# Supplementary material for: Extensive alternative polyadenylation during zebrafish development
Source: HighWire-hosted journal article supplement (doi:10.1101/gr.139733.112), 2012-06-21
Supplement: TableS2.xlsx [file TableS2.xlsx]

## Sheet: Sheet1
3P Tag cluster position	3' end	Number of tags	Category
chrM:10497-10522 (+)	10518	737353	Mitochondria
chr17:758919-758942 (-)	758921	649167	Known 3'UTR
chrM:8011-8041 (+)	8048	597846	Mitochondria
chrM:9709-9733 (+)	9733	319958	Mitochondria
chr20:54384229-54384260 (+)	54384260	316868	Known 3'UTR
chr20:54381012-54381040 (+)	54381041	316590	Known 3'UTR
chr1:34340605-34340635 (-)	34340609	311465	Known 3'UTR
chr3:61802778-61802803 (-)	61802778	299334	Known 3'UTR
chr7:31296937-31296965 (+)	31296974	292450	Novel 3'UTR
chr3:45814491-45814520 (-)	45814489	290863	Known 3'UTR
chrM:8787-8817 (+)	8820	287288	Mitochondria
chr22:26273765-26273794 (+)	26273793	270044	Known 3'UTR
chrM:3701-3730 (+)	3731	267826	Mitochondria
chr8:47909504-47909531 (-)	47909508	261757	Known 3'UTR
chr20:30398261-30398290 (-)	30398260	244939	Known 3'UTR
chr22:25658015-25658044 (+)	25658045	234336	Known 3'UTR
chr14:34306763-34306790 (-)	34306760	231194	Known 3'UTR
chr19:5980625-5980651 (-)	5980625	226136	Known 3'UTR
chr3:18132092-18132122 (+)	18132116	213329	Known 3'UTR
chrM:925-950 (+)	950	208145	Mitochondria
chrM:12650-12678 (+)	12679	193701	Mitochondria
chr20:54368477-54368500 (-)	54368477	190727	Novel 3'UTR
chr1:38578872-38578902 (-)	38578879	189155	Known 3'UTR
chr20:54569065-54569089 (+)	54569090	186987	Known 3'UTR
chr20:54441064-54441092 (+)	54441099	183624	Known 3'UTR
chr15:22997268-22997290 (-)	22997267	178133	Known 3'UTR
chr14:5871284-5871316 (+)	5871313	174910	Known 3'UTR
chr22:26305283-26305308 (+)	26305309	170988	Known 3'UTR
chr21:25158232-25158262 (+)	25158256	169256	Known 3'UTR
chr9:56199724-56199750 (+)	56199752	165532	Known 3'UTR
chr22:26185983-26186010 (+)	26186008	163847	Known 3'UTR
chr1:17552782-17552812 (-)	17552787	162951	Known 3'UTR
chr6:33608796-33608823 (-)	33608799	157254	Known 3'UTR
chr7:59995496-59995527 (+)	59995522	156843	Known 3'UTR
chr11:45988416-45988442 (+)	45988442	154146	Known 3'UTR
chr20:54564732-54564761 (+)	54564755	152533	Known 3'UTR
chrM:16420-16448 (+)	16448	142829	Mitochondria
chr12:17701282-17701311 (-)	17701281	142304	Novel 3'UTR
chr12:17962602-17962626 (-)	17962597	141944	Known 3'UTR
chr12:17784891-17784917 (-)	17784891	141746	Novel 3'UTR
chr6:57428412-57428442 (-)	57428412	141179	Known 3'UTR
chr14:53369689-53369715 (-)	53369686	139293	Known 3'UTR
chr14:40343861-40343886 (+)	40343886	138083	Novel 3'UTR
chr18:17195085-17195117 (+)	17195113	137415	Known 3'UTR
chr11:13398485-13398509 (+)	13398512	136922	Known 3'UTR
chr5:39439452-39439482 (+)	39439477	134630	Known 3'UTR
chrM:10903-10933 (+)	10938	132786	Mitochondria
chr2:56552149-56552178 (-)	56552151	130249	Known 3'UTR
chr4:7210123-7210147 (-)	7210121	126144	Known 3'UTR
chr3:3919419-3919443 (-)	3919422	122997	Known 3'UTR
chr20:54559354-54559381 (+)	54559381	122411	Known 3'UTR
chr17:2370347-2370377 (-)	2370347	121913	Known 3'UTR
chr5:34504776-34504802 (+)	34504804	118904	Novel 3'UTR
chr21:32382376-32382404 (-)	32382373	118828	Known 3'UTR
chr20:54572897-54572925 (+)	54572925	118673	Known 3'UTR
chr20:54591835-54591861 (-)	54591835	115680	Known 3'UTR
chr16:19254362-19254393 (-)	19254375	115221	Known 3'UTR
chr3:15852387-15852417 (+)	15852423	114274	Known 3'UTR
chr24:9777353-9777383 (-)	9777358	113548	Known 3'UTR
chr22:25896345-25896371 (-)	25896339	109709	Known 3'UTR
chr20:54550247-54550276 (+)	54550280	108975	Known 3'UTR
chr20:54390969-54390994 (+)	54390994	106166	Known 3'UTR
chr24:33723348-33723374 (-)	33723345	104439	Known 3'UTR
chr20:51546524-51546548 (+)	51546549	102689	Known 3'UTR
chr13:33906352-33906374 (-)	33906348	99296	Known 3'UTR
chr14:42999861-42999892 (-)	42999867	98522	Known 3'UTR
chr19:19381461-19381491 (+)	19381496	97814	Known 3'UTR
chr3:32950588-32950612 (-)	32950581	97749	Novel 3'UTR
chr11:5966151-5966182 (+)	5966182	97548	Known 3'UTR
chr23:45382149-45382179 (+)	45382174	97295	Known 3'UTR
chr22:18767274-18767301 (-)	18767283	91354	Known 3'UTR
chr22:7482109-7482133 (+)	7482131	91354	Novel 3'UTR
chr22:25833909-25833936 (+)	25833933	90550	Known 3'UTR
chr5:2059989-2060018 (-)	2059989	88719	Known 3'UTR
chr1:52223792-52223820 (+)	52223811	87436	Known 3'UTR
chr22:39555941-39555973 (-)	39555940	86852	Known 3'UTR
chr19:34236047-34236079 (+)	34236080	86437	Novel 3'UTR
chr10:46005419-46005451 (-)	46005419	85212	Known 3'UTR
chr20:54555132-54555157 (+)	54555152	84861	Known 3'UTR
chr23:35762912-35762941 (+)	35762941	83371	Known 3'UTR
chr1:7725184-7725207 (-)	7725188	82282	Known 3'UTR
chr3:40520890-40520913 (-)	40520890	82041	Known 3'UTR
chr17:50497329-50497356 (-)	50497327	81891	Known 3'UTR
chr14:22116433-22116462 (+)	22116460	79947	Known 3'UTR
chr18:19231884-19231912 (-)	19231878	78462	Known 3'UTR
chr8:2668868-2668894 (-)	2668868	77194	Known 3'UTR
chr17:2365367-2365397 (-)	2365374	77073	Known 3'UTR
chr23:3765487-3765513 (-)	3765485	75249	Known 3'UTR
chr13:8208789-8208817 (+)	8208820	74961	Known 3'UTR
chr5:55149859-55149887 (-)	55149851	74773	Known 3'UTR
chr4:20584705-20584733 (-)	20584705	74513	Known 3'UTR
chr22:26293552-26293576 (+)	26293584	73738	Known 3'UTR
chr9:46066077-46066106 (+)	46066105	72961	Known 3'UTR
chrM:15284-15306 (+)	15306	72902	Mitochondria
chr8:24595896-24595920 (+)	24595921	72509	Known 3'UTR
chr13:45629545-45629574 (-)	45629553	71903	Known 3'UTR
chr2:59487731-59487756 (-)	59487736	71748	Known 3'UTR
chr16:28254265-28254291 (+)	28254287	71454	Known 3'UTR
chr10:35931782-35931811 (-)	35931785	70780	Known 3'UTR
chr1:774715-774739 (-)	774715	70433	Known 3'UTR
chr16:19053474-19053503 (+)	19053504	69989	Known 3'UTR
chr14:23143138-23143167 (+)	23143174	69193	Known 3'UTR
chr1:609308-609337 (+)	609337	68874	Known 3'UTR
chr21:286512-286540 (-)	286521	68740	Known 3'UTR
chr19:5963567-5963591 (-)	5963567	68733	Known 3'UTR
chr7:31967593-31967622 (+)	31967623	68197	Known 3'UTR
chr14:6932409-6932436 (+)	6932431	65390	Known 3'UTR
chr5:46429465-46429488 (+)	46429495	63166	Known 3'UTR
chr11:31128883-31128910 (+)	31128901	63045	Unannotated region
chr16:26429327-26429357 (-)	26429326	62983	Known 3'UTR
chr5:33855164-33855195 (+)	33855190	62852	Known 3'UTR
chr10:40428878-40428906 (+)	40428902	62477	Novel 3'UTR
chr19:45290655-45290685 (+)	45290687	62449	Known 3'UTR
chr19:49963559-49963585 (+)	49963581	62282	Novel 3'UTR
chr20:31310768-31310795 (+)	31310796	62201	Known 3'UTR
chr8:52661176-52661205 (+)	52661201	61954	Known 3'UTR
chr3:30045086-30045113 (-)	30045085	61740	Known 3'UTR
chr10:30761436-30761461 (+)	30761465	61476	Known 3'UTR
chr9:8410202-8410228 (+)	8410227	60751	Known 3'UTR
chr11:43640207-43640235 (+)	43640231	58868	Known 3'UTR
chr20:34013992-34014023 (+)	34014028	58186	Known 3'UTR
chr16:55535266-55535293 (-)	55535265	58035	Known 3'UTR
chr10:40466684-40466711 (-)	40466687	57686	Known 3'UTR
chr6:39239363-39239386 (-)	39239363	57600	Known 3'UTR
chr8:49299969-49299997 (-)	49299969	56820	Known 3'UTR
chr19:49852376-49852404 (-)	49852381	56602	Known 3'UTR
chr14:49286536-49286563 (+)	49286569	56318	Novel 3'UTR
chr3:32237946-32237972 (+)	32237973	55681	Known 3'UTR
chr3:32257296-32257325 (+)	32257328	55403	Known 3'UTR
chr19:20267103-20267128 (-)	20267099	54699	Known 3'UTR
chr1:22043826-22043854 (-)	22043822	54644	Known 3'UTR
chr7:55231612-55231637 (+)	55231637	54391	Novel 3'UTR
chr21:5745514-5745543 (+)	5745539	53917	Known 3'UTR
chr6:7630151-7630178 (-)	7630159	53500	Known 3'UTR
chr12:5741970-5741996 (+)	5741999	53384	Known 3'UTR
chr8:2666293-2666323 (+)	2666321	53127	Novel 3'UTR
chr7:23962166-23962197 (+)	23962190	52925	Known 3'UTR
chr17:2358505-2358532 (-)	2358509	52886	Known 3'UTR
chr9:40046538-40046566 (-)	40046541	52747	Known 3'UTR
chr3:60296942-60296963 (+)	60296968	52270	Known 3'UTR
chr11:30416904-30416932 (+)	30416937	51489	Known 3'UTR
chr8:54978380-54978407 (+)	54978401	50846	Known 3'UTR
chr4:108167-108199 (+)	108196	50509	Novel 3'UTR
chr9:34251542-34251570 (+)	34251563	50439	Known 3'UTR
chr9:34254941-34254966 (+)	34254966	50081	Known 3'UTR
chr7:47639364-47639395 (+)	47639396	49544	Known 3'UTR
chr11:30529507-30529537 (-)	30529511	49469	Novel 3'UTR
chr22:25763018-25763046 (+)	25763041	49105	Known 3'UTR
chr22:25748355-25748379 (+)	25748384	48750	Known 3'UTR
chr21:38444345-38444374 (-)	38444345	48492	Known 3'UTR
chr6:34825032-34825060 (+)	34825058	48140	Known 3'UTR
chr14:33738543-33738569 (-)	33738543	47784	Known 3'UTR
chr6:34893287-34893313 (+)	34893313	47487	Known 3'UTR
chr16:51486516-51486548 (-)	51486520	47381	Known 3'UTR
chr6:10741798-10741824 (-)	10741794	47261	Known 3'UTR
Zv9_NA883:34774-34800 (-)	34768	47188	Known 3'UTR
chr23:10457949-10457978 (+)	10457978	47153	Known 3'UTR
chr5:24298077-24298102 (+)	24298102	47030	Novel 3'UTR
chr12:17941584-17941612 (-)	17941584	45530	Novel 3'UTR
chr7:60140308-60140340 (+)	60140342	45300	Known 3'UTR
chr12:17758538-17758564 (-)	17758537	45289	Known 3'UTR
chr16:27320041-27320064 (-)	27320045	44582	Known 3'UTR
chr20:23411330-23411357 (-)	23411327	44465	Known 3'UTR
chr20:34980624-34980649 (+)	34980649	44262	Known 3'UTR
chr23:36361135-36361157 (+)	36361158	44256	Known 3'UTR
chr2:23354452-23354479 (-)	23354449	44037	Known 3'UTR
chr7:21735287-21735315 (-)	21735290	43939	Known 3'UTR
chr5:48698381-48698409 (+)	48698405	43924	Known 3'UTR
chr3:33558101-33558130 (-)	33558103	43544	Known 3'UTR
chr1:33277897-33277925 (-)	33277888	43332	Novel 3'UTR
chr10:26328822-26328848 (-)	26328827	43270	Known 3'UTR
chr23:25593918-25593942 (+)	25593935	42914	Novel 3'UTR
chr9:57952806-57952837 (-)	57952805	42701	Known 3'UTR
Zv9_NA880:23207-23235 (+)	23231	42400	Known 3'UTR
chr21:3193042-3193072 (-)	3193048	42034	Novel 3'UTR
chr10:35028458-35028482 (-)	35028458	41899	Known 3'UTR
chr9:22269040-22269068 (-)	22269035	41335	Known 3'UTR
chr12:15890472-15890500 (+)	15890506	41312	Known 3'UTR
chr22:25203627-25203659 (-)	25203631	41111	Known 3'UTR
chr5:34636658-34636684 (-)	34636661	40949	Known 3'UTR
chr10:19606226-19606252 (+)	19606245	40749	Novel 3'UTR
chr5:43687042-43687070 (+)	43687071	40351	Known 3'UTR
chr17:26554797-26554821 (-)	26554802	40328	Known 3'UTR
chr1:23134484-23134509 (+)	23134509	40200	Known 3'UTR
chr14:22694974-22695001 (+)	22695001	40035	Novel 3'UTR
chr24:39196022-39196046 (+)	39196039	39899	Known 3'UTR
chr18:4945248-4945275 (-)	4945256	39576	Known 3'UTR
chr17:32836006-32836032 (+)	32836034	39221	Known 3'UTR
chr23:3765196-3765222 (-)	3765200	39200	Known 3'UTR
chr15:30810613-30810639 (-)	30810619	39033	Known 3'UTR
chr16:26027913-26027940 (-)	26027909	38773	Known 3'UTR
chr15:45650593-45650624 (-)	45650597	38739	Unannotated region
chr10:43743624-43743656 (+)	43743651	38404	Known 3'UTR
chr12:17586034-17586061 (+)	17586055	37876	Known 3'UTR
chr24:27278566-27278590 (-)	27278567	37347	Novel 3'UTR
chr12:17825932-17825962 (-)	17825927	37290	Known 3'UTR
chr1:49938549-49938574 (-)	49938549	37161	Novel 3'UTR
chr12:18005760-18005787 (-)	18005762	37148	Known 3'UTR
chr6:13110985-13111010 (-)	13110984	36849	Novel 3'UTR
chr15:34411587-34411611 (-)	34411595	36842	Known 3'UTR
chr5:17718234-17718257 (-)	17718234	36823	Known 3'UTR
chr9:36684377-36684405 (-)	36684369	36806	Known 3'UTR
chr24:18993293-18993316 (-)	18993296	36800	Known 3'UTR
chr8:41718606-41718631 (+)	41718637	36683	Known 3'UTR
chr10:6837632-6837654 (-)	6837632	36487	Known 3'UTR
chr23:35742200-35742226 (-)	35742208	35718	Known 3'UTR
chr6:6190308-6190332 (+)	6190332	35639	Known 3'UTR
chr3:55983696-55983723 (+)	55983728	35587	Known 3'UTR
chr24:17576417-17576444 (-)	17576416	35530	Known 3'UTR
chr3:6136699-6136727 (-)	6136694	35489	Known 3'UTR
chr7:13760843-13760872 (+)	13760869	35434	Known 3'UTR
chrM:1684-1711 (+)	1713	35345	Mitochondria
chr10:16085456-16085483 (+)	16085481	34918	Known 3'UTR
chr22:26215729-26215755 (+)	26215755	34319	Novel 3'UTR
chr22:21010301-21010326 (-)	21010304	34140	Known 3'UTR
chr14:31670874-31670904 (+)	31670900	34106	Novel 3'UTR
chr19:39050548-39050574 (-)	39050547	34102	Known 3'UTR
chr10:5020619-5020646 (-)	5020619	33925	Known 3'UTR
chr23:44720186-44720217 (+)	44720221	33844	Known 3'UTR
chr9:2336194-2336222 (+)	2336217	33710	Known 3'UTR
chr22:14270150-14270179 (+)	14270179	33578	Known 3'UTR
chr12:26465126-26465158 (+)	26465160	33561	Known 3'UTR
chr20:20888907-20888933 (-)	20888907	33088	Known 3'UTR
chr9:34182141-34182172 (+)	34182173	32890	Known 3'UTR
chr12:18772772-18772801 (-)	18772767	32856	Known 3'UTR
chr16:48994114-48994142 (+)	48994142	32847	Known 3'UTR
chr8:24629726-24629752 (-)	24629728	32655	Known 3'UTR
chr3:35621275-35621301 (-)	35621275	32604	Novel 3'UTR
chr8:49824031-49824055 (+)	49824055	32530	Known 3'UTR
chr16:25730349-25730370 (+)	25730370	31919	Known 3'UTR
chr22:25342157-25342185 (-)	25342160	31881	Known 3'UTR
chr5:14858586-14858607 (+)	14858607	31869	Known 3'UTR
chr6:9440526-9440550 (+)	9440548	31847	Novel 3'UTR
chr19:25952728-25952757 (+)	25952753	31780	Known 3'UTR
chr14:25279594-25279624 (+)	25279620	31554	Known 3'UTR
chr5:65066822-65066848 (+)	65066854	31533	Known 3'UTR
chr25:30180035-30180065 (+)	30180070	31378	Known 3'UTR
chr15:15091892-15091923 (-)	15091892	31375	Novel 3'UTR
chr3:39571806-39571832 (+)	39571827	31252	Known 3'UTR
chr14:48568664-48568689 (-)	48568665	31189	Unannotated region
chr9:12924939-12924967 (-)	12924937	31150	Known 3'UTR
chr22:25722575-25722597 (+)	25722605	31081	Known 3'UTR
chr12:44354889-44354915 (+)	44354919	31066	Known 3'UTR
chrM:6009-6037 (+)	6037	31038	Mitochondria
chr11:21577569-21577595 (-)	21577567	31014	Known 3'UTR
chr1:23155361-23155390 (+)	23155388	30816	Known 3'UTR
chr6:27918111-27918135 (+)	27918135	30808	Novel 3'UTR
chr19:21266033-21266059 (+)	21266054	30661	Known 3'UTR
chr1:54629266-54629293 (-)	54629265	30632	Unannotated region
chr1:23253424-23253454 (+)	23253454	30421	Unannotated region
chr7:28169846-28169873 (+)	28169875	30312	Known 3'UTR
chr16:31773695-31773726 (+)	31773723	30303	Known 3'UTR
chr22:25710287-25710313 (+)	25710313	30122	Known 3'UTR
chr22:14238828-14238856 (+)	14238859	30021	Known 3'UTR
chr8:29198437-29198464 (-)	29198440	29989	Known 3'UTR
chr24:9812389-9812413 (-)	9812391	29972	Known 3'UTR
chr3:23890529-23890556 (-)	23890532	29962	Known 3'UTR
chr19:6045359-6045385 (+)	6045386	29875	Novel 3'UTR
chr21:820944-820968 (-)	820942	29826	Known 3'UTR
chr5:36605346-36605377 (-)	36605343	29751	Novel 3'UTR
chr24:39080419-39080443 (-)	39080413	29708	Known 3'UTR
chr13:33833854-33833880 (+)	33833880	29408	Known 3'UTR
chr23:20001105-20001133 (-)	20001107	29404	Known 3'UTR
chr16:29459870-29459896 (+)	29459898	29214	Known 3'UTR
chr21:5331799-5331830 (+)	5331830	29203	Known 3'UTR
chr15:5433-5463 (+)	5468	29181	Novel 3'UTR
chr19:5974114-5974144 (-)	5974114	29155	Known 3'UTR
chr11:18651267-18651291 (-)	18651268	29155	Known 3'UTR
chr11:5890500-5890526 (-)	5890509	29049	Known 3'UTR
chr6:220899-220923 (+)	220923	28927	Known 3'UTR
chr3:59052799-59052830 (+)	59052830	28831	Known 3'UTR
chr15:5792226-5792252 (-)	5792223	28535	Unannotated region
chr19:9365865-9365894 (-)	9365868	28477	Known 3'UTR
chr14:3122607-3122636 (-)	3122607	28397	Known 3'UTR
chr17:4016809-4016834 (-)	4016809	28396	Known 3'UTR
chr5:38499283-38499310 (+)	38499305	28053	Known 3'UTR
chr25:240746-240771 (+)	240768	27954	Novel 3'UTR
chr4:61147422-61147453 (-)	61147430	27769	Unannotated region
chr22:14243487-14243514 (+)	14243512	27767	Known 3'UTR
chr10:30725321-30725345 (+)	30725345	27584	Known 3'UTR
chr10:37917429-37917460 (+)	37917456	27537	Known 3'UTR
chr25:248844-248869 (+)	248866	27377	Known 3'UTR
chr6:19955740-19955768 (+)	19955763	27094	Known 3'UTR
chr2:29901113-29901140 (+)	29901137	26944	Known 3'UTR
chr22:25808990-25809018 (+)	25809014	26844	Known 3'UTR
chr22:588439-588465 (-)	588433	26593	Known 3'UTR
chr15:33133896-33133919 (-)	33133896	26274	Known 3'UTR
chr12:18018778-18018804 (+)	18018797	26254	Known 3'UTR
chr13:36932096-36932122 (-)	36932096	26168	Known 3'UTR
chr17:25118266-25118294 (-)	25118273	26141	Known 3'UTR
chr6:10981209-10981239 (-)	10981208	26062	Known 3'UTR
chr6:8062499-8062529 (+)	8062529	25899	Known 3'UTR
chr1:11658036-11658059 (+)	11658059	25878	Known 3'UTR
chr2:10478582-10478609 (-)	10478582	25859	Known 3'UTR
chr10:29052596-29052623 (-)	29052598	25823	Known 3'UTR
chr23:21815648-21815674 (-)	21815648	25800	Known 3'UTR
chr17:52283834-52283862 (+)	52283859	25400	Known 3'UTR
chr1:24708904-24708929 (+)	24708929	25296	Known 3'UTR
chr12:4732695-4732722 (-)	4732694	25294	Known 3'UTR
chr9:34356410-34356440 (-)	34356414	25224	Known 3'UTR
chr14:27738360-27738389 (+)	27738385	25202	Known 3'UTR
chr13:43886608-43886636 (-)	43886605	25174	Known 3'UTR
chr25:33898763-33898789 (-)	33898766	25167	Known 3'UTR
chr19:9365796-9365826 (-)	9365796	25015	Known 3'UTR
chr16:26212919-26212947 (+)	26212947	24970	Known 3'UTR
chr1:25626431-25626456 (-)	25626437	24947	Known 3'UTR
chr24:9804120-9804147 (-)	9804124	24939	Known 3'UTR
chr14:6919853-6919881 (+)	6919872	24875	Known 3'UTR
chr4:61299019-61299045 (-)	61299021	24791	Known 3'UTR
chrM:4749-4779 (+)	4780	24743	Mitochondria
chr22:19170510-19170540 (+)	19170540	24716	Known 3'UTR
chr19:32245235-32245262 (-)	32245243	24696	Known 3'UTR
chr11:25043697-25043723 (+)	25043717	24612	Known 3'UTR
chr18:7031304-7031329 (+)	7031330	24580	Novel 3'UTR
chr23:18045038-18045063 (+)	18045058	24497	Known 3'UTR
chr24:9788558-9788583 (-)	9788557	24491	Known 3'UTR
chr24:9782945-9782970 (-)	9782945	24386	Unannotated region
chr16:26187802-26187828 (+)	26187828	24245	Known 3'UTR
chr22:26950-26970 (-)	26941	24150	Known 3'UTR
chr10:15641839-15641868 (+)	15641869	24102	Known 3'UTR
chr23:17598548-17598574 (-)	17598554	24076	Known 3'UTR
chr16:44947121-44947145 (-)	44947119	23924	Known 3'UTR
chr16:27369327-27369354 (+)	27369354	23916	Known 3'UTR
chr8:52657645-52657673 (+)	52657675	23773	Unannotated region
chr15:46777958-46777985 (+)	46777986	23753	Novel 3'UTR
chr22:17765334-17765362 (+)	17765362	23572	Known 3'UTR
chrM:1529-1553 (+)	1559	23490	Mitochondria
chr7:27044123-27044147 (+)	27044148	23429	Known 3'UTR
chr22:25934778-25934801 (+)	25934801	23408	Known 3'UTR
chr19:1975673-1975695 (-)	1975673	23407	Novel 3'UTR
chr5:26542499-26542531 (-)	26542495	23227	Known 3'UTR
chr16:7435502-7435530 (-)	7435502	23221	Known 3'UTR
chr7:40853053-40853081 (+)	40853078	23080	Known 3'UTR
chr6:54385569-54385599 (-)	54385571	22949	Known 3'UTR
chr3:23528901-23528930 (+)	23528932	22936	Novel 3'UTR
chrM:6391-6420 (+)	6420	22861	Mitochondria
chr1:9480117-9480143 (+)	9480143	22732	Known 3'UTR
chr4:15897293-15897319 (-)	15897290	22654	Known 3'UTR
chr7:36533219-36533246 (+)	36533246	22625	Known 3'UTR
chr14:19056584-19056608 (+)	19056610	22533	Known 3'UTR
chr11:18554903-18554929 (+)	18554930	22494	Known 3'UTR
chr21:44026868-44026896 (-)	44026870	22446	Known 3'UTR
chr11:209711-209739 (-)	209713	22338	Known 3'UTR
chr14:18746122-18746144 (+)	18746144	22299	Known 3'UTR
chr14:35691599-35691623 (+)	35691619	22298	Known 3'UTR
chr11:18539351-18539379 (+)	18539379	22260	Known 3'UTR
chr24:24772830-24772857 (-)	24772829	22245	Novel 3'UTR
chr9:8445855-8445882 (+)	8445890	22219	Known 3'UTR
chr23:34273484-34273510 (+)	34273514	22082	Known 3'UTR
chr13:45634916-45634942 (-)	45634915	22072	Known 3'UTR
chr11:18678101-18678129 (+)	18678129	21978	Known 3'UTR
chr5:43714891-43714916 (+)	43714913	21957	Known 3'UTR
chr22:17813702-17813730 (-)	17813695	21880	Known 3'UTR
chr15:34398713-34398742 (-)	34398713	21712	Known 3'UTR
chr19:31064021-31064045 (+)	31064045	21482	Known 3'UTR
chr11:38795035-38795065 (+)	38795066	21440	Known 3'UTR
chr1:45661399-45661425 (-)	45661398	21222	Known 3'UTR
chr16:39510468-39510491 (+)	39510491	21220	Known 3'UTR
chr23:18740017-18740046 (-)	18740023	21123	Known 3'UTR
chr3:17673192-17673216 (+)	17673214	21112	Known 3'UTR
chr8:26150847-26150876 (+)	26150870	21039	Known 3'UTR
chr16:55603590-55603616 (-)	55603587	20894	Novel 3'UTR
chr23:10355848-10355877 (-)	10355850	20877	Known 3'UTR
chr25:31332647-31332671 (-)	31332647	20859	Known 3'UTR
chr8:49300677-49300704 (-)	49300677	20843	Novel 3'UTR
chr15:28471898-28471921 (+)	28471915	20684	Known 3'UTR
chr9:47606305-47606332 (-)	47606306	20675	Known 3'UTR
chr14:40371532-40371555 (-)	40371532	20669	Known 3'UTR
chr24:21530133-21530163 (+)	21530163	20665	Known 3'UTR
chr20:16815699-16815730 (+)	16815721	20656	Known 3'UTR
chr12:18777972-18777997 (-)	18777980	20619	Known 3'UTR
chr13:46748086-46748114 (+)	46748114	20554	Known 3'UTR
chr17:43063818-43063846 (+)	43063846	20488	Known 3'UTR
chr16:58375338-58375368 (+)	58375367	20425	Known 3'UTR
chr2:5901165-5901193 (+)	5901184	20355	Known 3'UTR
chr3:40291917-40291946 (-)	40291917	20345	Novel 3'UTR
chr14:7141306-7141336 (-)	7141307	20343	Known 3'UTR
chr20:16478199-16478225 (-)	16478205	20147	Known 3'UTR
chr23:28568712-28568734 (+)	28568730	19972	Known 3'UTR
chr7:34234313-34234344 (+)	34234347	19846	Known 3'UTR
chr23:31674469-31674500 (+)	31674500	19784	Known 3'UTR
chr3:61784967-61784997 (-)	61784967	19765	Known 3'UTR
chr17:34974848-34974874 (+)	34974870	19726	Novel 3'UTR
chr3:13608062-13608091 (+)	13608100	19608	Known 3'UTR
chr8:2587652-2587677 (-)	2587652	19600	Known 3'UTR
chr1:45780341-45780370 (-)	45780343	19513	Unannotated region
chr13:22818286-22818315 (+)	22818313	19382	Known 3'UTR
chr14:32485446-32485473 (-)	32485456	19296	Known 3'UTR
chr16:26219620-26219648 (+)	26219648	19192	Known 3'UTR
chr14:40347355-40347382 (+)	40347382	19140	Known 3'UTR
chr8:55359745-55359773 (-)	55359745	19061	Known 3'UTR
chr8:51569481-51569512 (-)	51569481	18938	Novel 3'UTR
chr18:30454491-30454518 (+)	30454516	18936	Known 3'UTR
chr17:32731377-32731405 (+)	32731405	18919	Known 3'UTR
chr12:33408371-33408394 (-)	33408373	18897	Novel 3'UTR
chr21:26125538-26125568 (+)	26125572	18841	Known 3'UTR
chr20:28858668-28858699 (-)	28858670	18753	Known 3'UTR
chr23:18203289-18203318 (-)	18203289	18726	Known 3'UTR
chr5:74812575-74812602 (-)	74812580	18679	Known 3'UTR
chr5:2107093-2107119 (-)	2107093	18642	Unannotated region
chr15:23092626-23092645 (+)	23092649	18576	Known 3'UTR
chr25:3943685-3943716 (-)	3943685	18506	Known 3'UTR
chr8:2666507-2666532 (+)	2666536	18501	Known 3'UTR
chr2:5891523-5891551 (+)	5891552	18482	Known 3'UTR
chr12:14437774-14437800 (-)	14437774	18469	Known 3'UTR
chr18:37556276-37556303 (+)	37556294	18419	Known 3'UTR
chr11:46009529-46009555 (+)	46009553	18293	Known 3'UTR
chr9:30560296-30560322 (+)	30560326	18281	Known 3'UTR
chr18:26732460-26732483 (-)	26732459	18265	Known 3'UTR
chr18:39172977-39173008 (-)	39172976	18241	Known 3'UTR
chr11:19124529-19124557 (-)	19124533	18236	Known 3'UTR
chr5:30199065-30199091 (-)	30199065	18222	Known 3'UTR
chr19:49384434-49384464 (+)	49384462	18172	Known 3'UTR
chr22:26091761-26091786 (-)	26091765	18135	Known 3'UTR
chr7:31612742-31612769 (-)	31612744	18123	Novel 3'UTR
chr24:22233449-22233474 (+)	22233470	17952	Known 3'UTR
chr3:26878042-26878067 (-)	26878047	17947	Known 3'UTR
chr16:33984641-33984666 (-)	33984641	17892	Known 3'UTR
chr22:15867959-15867987 (+)	15867983	17888	Known 3'UTR
chr16:33741657-33741685 (-)	33741660	17856	Novel 3'UTR
chr3:19997504-19997535 (-)	19997503	17841	Known 3'UTR
chr20:20802350-20802376 (+)	20802370	17839	Unannotated region
chr1:16420958-16420987 (+)	16420983	17826	Known 3'UTR
chr3:31256020-31256051 (-)	31256020	17816	Known 3'UTR
chr2:30462816-30462843 (+)	30462841	17695	Known 3'UTR
chr13:8143344-8143371 (-)	8143346	17644	Known 3'UTR
chr12:36272051-36272079 (-)	36272049	17532	Known 3'UTR
chr22:25223574-25223604 (-)	25223573	17503	Known 3'UTR
chr20:18786085-18786114 (+)	18786108	17497	Known 3'UTR
chr7:67328063-67328090 (-)	67328061	17385	Novel 3'UTR
chr15:27598055-27598081 (-)	27598052	17366	Known 3'UTR
chr22:40858637-40858668 (+)	40858664	17364	Known 3'UTR
chr20:50009036-50009061 (-)	50009036	17346	Novel 3'UTR
chr3:12975223-12975246 (+)	12975246	17342	Known 3'UTR
chr19:41000211-41000240 (+)	41000247	17278	Known 3'UTR
chr22:17835642-17835667 (+)	17835669	17172	Known 3'UTR
chr19:5986764-5986796 (-)	5986768	16930	Known 3'UTR
chr25:3377390-3377418 (+)	3377425	16925	Known 3'UTR
chr19:49369107-49369138 (+)	49369139	16900	Novel 3'UTR
chr4:444188-444217 (+)	444222	16887	Novel 3'UTR
chr5:25978574-25978603 (+)	25978599	16846	Known 3'UTR
chr16:25671810-25671841 (+)	25671843	16788	Known 3'UTR
chr14:13985113-13985140 (+)	13985135	16732	Known 3'UTR
chr11:6179698-6179721 (+)	6179719	16702	Known 3'UTR
chr20:2771728-2771753 (+)	2771761	16665	Known 3'UTR
chr20:20768087-20768112 (+)	20768112	16596	Known 3'UTR
chr1:24708884-24708915 (+)	24708916	16520	Known 3'UTR
chr8:29120490-29120516 (-)	29120489	16503	Known 3'UTR
chr3:32493806-32493831 (-)	32493809	16363	Known 3'UTR
chr5:59147165-59147193 (+)	59147200	16300	Known 3'UTR
chr8:47503534-47503562 (-)	47503538	16275	Known 3'UTR
chr18:36685080-36685108 (-)	36685087	16262	Known 3'UTR
chr5:14973778-14973802 (-)	14973781	16259	Novel 3'UTR
chr10:1734816-1734846 (-)	1734815	16234	Unannotated region
chr19:43977680-43977709 (-)	43977683	16212	Known 3'UTR
chr11:2028060-2028088 (-)	2028066	16199	Known 3'UTR
chr19:16829022-16829048 (-)	16829022	16099	Known 3'UTR
chr18:15805214-15805245 (+)	15805247	16050	Known 3'UTR
Zv9_NA401:32773-32802 (-)	32773	16017	Unannotated region
chr6:10821621-10821648 (-)	10821621	15953	Known 3'UTR
chr4:61133255-61133283 (-)	61133262	15944	Unannotated region
chr20:51423315-51423342 (-)	51423315	15928	Known 3'UTR
chr25:8144229-8144257 (+)	8144257	15906	Known 3'UTR
chr21:17882598-17882627 (+)	17882627	15891	Known 3'UTR
chr1:51551625-51551649 (+)	51551648	15883	Known 3'UTR
chr7:74435496-74435527 (+)	74435522	15829	Known 3'UTR
chr16:36602966-36602997 (-)	36602964	15812	Known 3'UTR
chr4:13972000-13972025 (-)	13972004	15806	Known 3'UTR
chr3:55952578-55952607 (+)	55952602	15800	Known 3'UTR
chr6:59576578-59576606 (+)	59576600	15712	Known 3'UTR
chr19:36546432-36546462 (-)	36546426	15690	Known 3'UTR
chr20:30058542-30058568 (-)	30058544	15689	Known 3'UTR
chr16:56122647-56122674 (+)	56122674	15650	Known 3'UTR
chr21:26103293-26103321 (-)	26103287	15650	Known 3'UTR
chr25:38415115-38415139 (+)	38415139	15607	Known 3'UTR
chr21:42036213-42036238 (-)	42036215	15599	Known 3'UTR
chr4:61128600-61128627 (-)	61128600	15494	Novel 3'UTR
chr18:33747012-33747042 (-)	33747008	15421	Known 3'UTR
chr9:31296497-31296526 (-)	31296497	15399	Known 3'UTR
chr10:2951962-2951991 (-)	2951967	15398	Known 3'UTR
chr2:26649779-26649811 (+)	26649817	15386	Novel 3'UTR
chr6:37679227-37679252 (+)	37679252	15383	Novel 3'UTR
chr3:55957611-55957638 (+)	55957631	15362	Known 3'UTR
chr7:27707518-27707547 (-)	27707512	15322	Known 3'UTR
chr3:55442887-55442916 (-)	55442889	15265	Known 3'UTR
chr8:52006515-52006545 (-)	52006516	15243	Known 3'UTR
chr21:11532659-11532684 (+)	11532677	15235	Known 3'UTR
chr5:29078872-29078903 (+)	29078898	15177	Known 3'UTR
chr11:20031664-20031692 (+)	20031697	15168	Known 3'UTR
chr3:32014305-32014333 (-)	32014298	15156	Known 3'UTR
chr23:2457607-2457630 (+)	2457638	15152	Known 3'UTR
chr5:62948654-62948682 (-)	62948654	15152	Known 3'UTR
chr8:21919712-21919741 (+)	21919748	15144	Known 3'UTR
chr1:11640883-11640913 (+)	11640913	15139	Known 3'UTR
chr10:45752923-45752953 (-)	45752923	15099	Known 3'UTR
chr19:36905561-36905587 (-)	36905561	15087	Known 3'UTR
chr6:6148202-6148231 (-)	6148200	15081	Known 3'UTR
chr24:22679174-22679199 (-)	22679168	15050	Novel 3'UTR
chr20:50361668-50361698 (-)	50361662	14974	Known 3'UTR
chr19:44011707-44011731 (-)	44011702	14948	Known 3'UTR
chr20:10728018-10728048 (+)	10728046	14927	Known 3'UTR
chr10:30723407-30723432 (-)	30723401	14873	Known 3'UTR
chr2:19460036-19460059 (-)	19460036	14832	Known 3'UTR
chr21:9989889-9989920 (-)	9989897	14805	Known 3'UTR
chr14:24630966-24630994 (+)	24630997	14789	Known 3'UTR
chr18:684355-684386 (-)	684360	14747	Known 3'UTR
chr21:25468102-25468129 (+)	25468125	14737	Known 3'UTR
chr19:20673075-20673104 (+)	20673099	14727	Known 3'UTR
chr15:38602104-38602132 (-)	38602104	14706	Known 3'UTR
chr11:38891944-38891968 (+)	38891972	14698	Known 3'UTR
chr21:27895066-27895096 (+)	27895096	14677	Known 3'UTR
chr24:9795797-9795823 (-)	9795800	14637	Known 3'UTR
chr7:69502576-69502603 (+)	69502611	14586	Known 3'UTR
chr13:47413316-47413345 (+)	47413345	14388	Known 3'UTR
chr16:14004964-14004994 (+)	14005000	14355	Known 3'UTR
chr15:42362034-42362063 (-)	42362039	14335	Known 3'UTR
chr16:15663117-15663140 (-)	15663117	14319	Known 3'UTR
chr22:5591426-5591454 (+)	5591454	14318	Novel 3'UTR
chr2:57733418-57733444 (+)	57733440	14304	Novel 3'UTR
chr19:44596143-44596172 (+)	44596166	14253	Known 3'UTR
chr5:67983294-67983326 (+)	67983327	14251	Known 3'UTR
chr2:32223423-32223448 (-)	32223429	14242	Known 3'UTR
chr22:754605-754634 (-)	754598	14238	Known 3'UTR
chr18:49676870-49676896 (-)	49676862	14238	Unannotated region
chr18:37609143-37609167 (-)	37609143	14206	Novel 3'UTR
chr19:21279167-21279195 (+)	21279205	14189	Known 3'UTR
chr1:53316574-53316598 (+)	53316592	14185	Known 3'UTR
chr10:16063750-16063778 (+)	16063770	14170	Novel 3'UTR
chr21:27907426-27907454 (+)	27907448	14154	Known 3'UTR
chr6:54129939-54129967 (-)	54129939	14141	Known 3'UTR
chr19:11954410-11954439 (-)	11954415	14126	Known 3'UTR
chr1:56764164-56764189 (-)	56764163	14112	Known 3'UTR
chr10:11246435-11246464 (+)	11246458	14098	Known 3'UTR
chr24:9819383-9819408 (-)	9819383	14066	Known 3'UTR
chr3:16008999-16009025 (-)	16009000	14045	Known 3'UTR
chr20:20802218-20802243 (+)	20802244	13960	Unannotated region
chr18:25882613-25882640 (-)	25882612	13936	Novel 3'UTR
chr10:22344970-22344997 (-)	22344976	13895	Known 3'UTR
chr2:1964820-1964850 (+)	1964848	13870	Known 3'UTR
chr14:6251888-6251916 (+)	6251910	13868	Known 3'UTR
chr25:7917279-7917306 (-)	7917289	13837	Known 3'UTR
chrM:8088-8116 (+)	8119	13833	Mitochondria
chr3:10243874-10243906 (+)	10243907	13829	Known 3'UTR
chr24:14138791-14138820 (+)	14138820	13791	Novel 3'UTR
chr14:12425930-12425958 (+)	12425964	13751	Novel 3'UTR
chr25:13097826-13097849 (+)	13097849	13704	Known 3'UTR
chr13:6290307-6290335 (+)	6290340	13693	Known 3'UTR
chr24:27271790-27271811 (-)	27271788	13680	Known 3'UTR
chr11:27542166-27542195 (+)	27542193	13672	Known 3'UTR
chr21:5733664-5733692 (-)	5733664	13654	Novel 3'UTR
chr8:31593605-31593627 (+)	31593627	13652	Known 3'UTR
chr5:69801146-69801171 (-)	69801145	13625	Known 3'UTR
chr3:26798805-26798829 (+)	26798827	13620	Known 3'UTR
chr20:30973424-30973455 (+)	30973455	13555	Known 3'UTR
chr7:46457937-46457968 (+)	46457972	13555	Novel 3'UTR
chr23:44683246-44683272 (-)	44683241	13551	Known 3'UTR
chr11:11904842-11904870 (-)	11904846	13539	Known 3'UTR
chr8:2666529-2666552 (+)	2666547	13539	Known 3'UTR
chr5:59275773-59275800 (+)	59275800	13531	Known 3'UTR
chr10:6215836-6215861 (+)	6215867	13529	Known 3'UTR
chr11:30421801-30421832 (+)	30421832	13525	Novel 3'UTR
chr5:38512034-38512057 (+)	38512064	13521	Known 3'UTR
chr7:46582686-46582716 (+)	46582722	13505	Novel 3'UTR
chr22:1189218-1189245 (-)	1189221	13504	Known 3'UTR
chr7:739929-739954 (+)	739949	13449	Known 3'UTR
chr3:29806012-29806041 (+)	29806041	13435	Known 3'UTR
chr19:4828633-4828656 (+)	4828655	13414	Known 3'UTR
chr11:2407300-2407330 (+)	2407321	13391	Novel 3'UTR
chr11:1361346-1361376 (-)	1361339	13388	Known 3'UTR
chr8:14697200-14697230 (-)	14697200	13386	Novel 3'UTR
chr2:36845284-36845310 (-)	36845285	13371	Known 3'UTR
chr17:24446049-24446077 (+)	24446075	13354	Novel 3'UTR
chr8:24713634-24713659 (+)	24713659	13314	Known 3'UTR
chr18:35610548-35610571 (+)	35610575	13270	Known 3'UTR
chr11:44500630-44500656 (+)	44500653	13220	Known 3'UTR
chr18:2489506-2489534 (+)	2489534	13208	Known 3'UTR
chr24:17461975-17461996 (+)	17461996	13188	Known 3'UTR
chr7:27636647-27636671 (-)	27636639	13178	Known 3'UTR
chr20:23233135-23233159 (-)	23233135	13137	Known 3'UTR
chr9:33337853-33337882 (+)	33337884	13127	Known 3'UTR
chr8:21757460-21757483 (+)	21757483	13122	Known 3'UTR
chr11:25289597-25289621 (+)	25289621	13116	Known 3'UTR
chr19:27162180-27162207 (-)	27162178	13095	Unannotated region
chr21:38392300-38392329 (-)	38392296	13089	Known 3'UTR
chr14:201282-201306 (-)	201290	13078	Known 3'UTR
chr11:31506354-31506384 (-)	31506360	13015	Known 3'UTR
chr6:51720579-51720608 (-)	51720584	12993	Known 3'UTR
chr13:36305928-36305953 (-)	36305933	12976	Known 3'UTR
chr6:44138948-44138974 (+)	44138967	12925	Known 3'UTR
chr23:17602061-17602085 (-)	17602061	12913	Known 3'UTR
chr24:17570620-17570644 (-)	17570627	12903	Known 3'UTR
chr15:34240292-34240319 (+)	34240321	12897	Known 3'UTR
chr19:31596431-31596453 (-)	31596431	12868	Novel 3'UTR
chr7:44633174-44633200 (-)	44633173	12850	Novel 3'UTR
chr14:34389621-34389645 (+)	34389645	12849	Known 3'UTR
chr3:32561248-32561276 (+)	32561276	12847	Novel 3'UTR
Zv9_NA891:2854-2877 (+)	2883	12844	Unannotated region
chr2:2368254-2368283 (-)	2368259	12837	Known 3'UTR
chr19:24383329-24383358 (-)	24383331	12828	Known 3'UTR
chr1:45499245-45499270 (-)	45499246	12826	Known 3'UTR
chr13:19362167-19362194 (+)	19362195	12814	Novel 3'UTR
chr23:36361934-36361959 (+)	36361957	12782	Known 3'UTR
chr2:22072986-22073011 (+)	22073009	12755	Known 3'UTR
chr16:43696185-43696208 (+)	43696208	12744	Known 3'UTR
chr8:10910935-10910960 (-)	10910935	12743	Known 3'UTR
chr3:1958847-1958878 (+)	1958877	12735	Novel 3'UTR
chr23:31665072-31665097 (-)	31665072	12722	Known 3'UTR
chr2:42462489-42462518 (-)	42462493	12720	Known 3'UTR
chr5:29511194-29511225 (-)	29511200	12700	Known 3'UTR
chr21:43897577-43897603 (-)	43897581	12694	Known 3'UTR
chr15:4218135-4218166 (-)	4218141	12681	Known 3'UTR
chr3:25371383-25371411 (-)	25371387	12660	Known 3'UTR
chr25:27744404-27744427 (-)	27744410	12638	Known 3'UTR
chr19:11822067-11822096 (-)	11822072	12630	Novel 3'UTR
chr16:13802316-13802342 (-)	13802314	12606	Known 3'UTR
chr18:34147425-34147454 (-)	34147424	12564	Known 3'UTR
chr19:45381394-45381419 (+)	45381419	12546	Known 3'UTR
chr1:39003577-39003604 (-)	39003576	12545	Known 3'UTR
chr3:31041542-31041571 (-)	31041548	12541	Novel 3'UTR
chr19:32836149-32836176 (+)	32836175	12531	Known 3'UTR
chr19:22298481-22298512 (-)	22298481	12479	Known 3'UTR
chr12:28777750-28777777 (-)	28777758	12463	Known 3'UTR
chr12:3804711-3804735 (-)	3804709	12456	Known 3'UTR
chr24:41179011-41179040 (-)	41179011	12427	Known 3'UTR
chr3:15665029-15665056 (-)	15665032	12376	Known 3'UTR
chr3:18661103-18661133 (+)	18661127	12365	Known 3'UTR
chr14:7560-7586 (+)	7582	12355	Known 3'UTR
chr3:41719684-41719711 (+)	41719711	12340	Novel 3'UTR
chr19:28388148-28388170 (+)	28388170	12338	Known 3'UTR
chr11:3317106-3317137 (-)	3317111	12327	Known 3'UTR
chr20:52097281-52097310 (-)	52097283	12321	Known 3'UTR
chr22:4339292-4339317 (-)	4339292	12321	Known 3'UTR
chr19:31067897-31067923 (-)	31067903	12320	Known 3'UTR
chr20:4176765-4176795 (+)	4176795	12304	Unannotated region
chr7:35584101-35584129 (+)	35584137	12302	Known 3'UTR
chr3:32070722-32070748 (+)	32070748	12284	Known 3'UTR
chr9:9404585-9404612 (-)	9404589	12251	Known 3'UTR
chr20:26438446-26438476 (-)	26438445	12246	Known 3'UTR
chr21:5437733-5437756 (-)	5437729	12241	Known 3'UTR
chr15:20734449-20734480 (+)	20734479	12236	Known 3'UTR
chr8:49970962-49970987 (+)	49970983	12233	Known 3'UTR
chr10:7126562-7126592 (+)	7126592	12230	Known 3'UTR
chr9:33195162-33195190 (-)	33195155	12229	Novel 3'UTR
chr11:30428027-30428056 (+)	30428065	12225	Known 3'UTR
chr9:31162037-31162066 (+)	31162066	12211	Known 3'UTR
chr22:10322623-10322653 (+)	10322651	12180	Known 3'UTR
chr7:72194718-72194744 (+)	72194744	12178	Novel 3'UTR
chr22:10650594-10650617 (-)	10650600	12161	Known 3'UTR
chr1:12911497-12911525 (+)	12911525	12159	Known 3'UTR
chr21:24500215-24500245 (+)	24500243	12145	Unannotated region
chr16:47854539-47854567 (-)	47854539	12135	Known 3'UTR
chr10:20406048-20406077 (+)	20406077	12132	Known 3'UTR
chr14:12324909-12324937 (-)	12324911	12127	Novel 3'UTR
chr12:30388000-30388023 (-)	30388000	12127	Unannotated region
chr13:25950394-25950418 (+)	25950424	12103	Known 3'UTR
chr12:49763061-49763091 (-)	49763060	12071	Known 3'UTR
chr6:40503381-40503407 (+)	40503414	12056	Novel 3'UTR
chr20:29611204-29611234 (+)	29611243	12043	Known 3'UTR
chr7:34317951-34317975 (-)	34317951	12031	Known 3'UTR
chr23:36349702-36349727 (-)	36349701	12023	Known 3'UTR
chr4:534003-534034 (+)	534034	12019	Unannotated region
chr21:260732-260759 (+)	260753	12005	Novel 3'UTR
chr12:24852769-24852798 (+)	24852791	11977	Known 3'UTR
chr20:39285317-39285345 (-)	39285317	11906	Known 3'UTR
chr1:23415136-23415165 (+)	23415167	11906	Known 3'UTR
chr21:6070820-6070849 (+)	6070856	11879	Known 3'UTR
chr7:53249034-53249065 (+)	53249061	11872	Known 3'UTR
chr1:59741821-59741845 (-)	59741821	11870	Novel 3'UTR
chr12:27454407-27454438 (+)	27454439	11868	Known 3'UTR
chr4:613648-613675 (+)	613669	11850	Known 3'UTR
chr15:1568304-1568333 (+)	1568333	11848	Known 3'UTR
chr24:39595619-39595646 (-)	39595619	11830	Known 3'UTR
chr11:14583528-14583554 (+)	14583551	11802	Known 3'UTR
chr14:1358240-1358271 (-)	1358234	11798	Known 3'UTR
chr6:29109474-29109503 (+)	29109494	11787	Known 3'UTR
chr19:9581159-9581184 (-)	9581160	11779	Known 3'UTR
chr23:20715813-20715845 (+)	20715845	11750	Known 3'UTR
chr12:27409568-27409594 (+)	27409595	11729	Known 3'UTR
chr24:27076102-27076131 (-)	27076106	11707	Novel 3'UTR
chr20:47013664-47013690 (+)	47013690	11678	Known 3'UTR
chr8:3869703-3869734 (+)	3869731	11640	Novel 3'UTR
chr4:61123935-61123961 (-)	61123938	11638	Known 3'UTR
chr13:25603504-25603529 (+)	25603529	11636	Known 3'UTR
chr4:13790896-13790920 (+)	13790920	11635	Novel 3'UTR
chr20:10734239-10734267 (+)	10734267	11625	Known 3'UTR
chr25:37026414-37026440 (+)	37026440	11608	Known 3'UTR
chr6:59803906-59803935 (+)	59803932	11602	Known 3'UTR
chr6:28941254-28941282 (+)	28941282	11600	Known 3'UTR
chr7:49697693-49697722 (-)	49697695	11582	Known 3'UTR
chr4:12642189-12642220 (-)	12642189	11581	Known 3'UTR
chr2:55854909-55854933 (+)	55854933	11574	Known 3'UTR
chr24:29686550-29686578 (-)	29686553	11547	Novel 3'UTR
chr8:21673720-21673748 (+)	21673750	11543	Known 3'UTR
chr14:2809711-2809738 (+)	2809732	11533	Mitochondria
chr2:21404287-21404311 (+)	21404306	11526	Known 3'UTR
chr4:61142637-61142666 (-)	61142644	11526	Unannotated region
chr14:6932029-6932055 (+)	6932054	11524	Novel 3'UTR
chr10:46362715-46362745 (-)	46362724	11522	Known 3'UTR
chr14:9600361-9600388 (+)	9600393	11507	Known 3'UTR
chr4:61138032-61138062 (-)	61138031	11494	Known 3'UTR
chr4:15945014-15945043 (-)	15945016	11491	Known 3'UTR
chr14:26935223-26935249 (-)	26935220	11457	Known 3'UTR
chr2:19234768-19234795 (+)	19234798	11408	Known 3'UTR
chr20:36699695-36699720 (-)	36699686	11397	Known 3'UTR
chr16:19254426-19254453 (-)	19254426	11393	Known 3'UTR
Zv9_NA363:2497-2521 (-)	2497	11384	Known 3'UTR
chr20:40746889-40746914 (-)	40746894	11349	Known 3'UTR
chr11:6231844-6231874 (-)	6231839	11336	Known 3'UTR
chr10:25963447-25963475 (-)	25963452	11323	Known 3'UTR
chr18:19825774-19825800 (+)	19825797	11321	Known 3'UTR
chr20:18352039-18352066 (-)	18352043	11318	Known 3'UTR
chrM:1104-1132 (+)	1126	11286	Mitochondria
chr11:5887170-5887195 (+)	5887188	11273	Novel 3'UTR
chr3:46833188-46833217 (+)	46833213	11254	Novel 3'UTR
chr21:11419515-11419543 (+)	11419549	11253	Known 3'UTR
chr23:44158981-44159005 (-)	44158987	11247	Novel 3'UTR
chr10:7776987-7777017 (+)	7777015	11235	Known 3'UTR
chr13:17763635-17763661 (-)	17763644	11226	Novel 3'UTR
chr1:39176577-39176603 (+)	39176599	11206	Known 3'UTR
chr24:42241030-42241057 (-)	42241036	11203	Known 3'UTR
chr19:6002771-6002798 (-)	6002765	11196	Known 3'UTR
chr16:35454217-35454240 (+)	35454240	11186	Known 3'UTR
chr24:7707496-7707521 (-)	7707496	11179	Novel 3'UTR
chr21:26119334-26119364 (+)	26119364	11164	Known 3'UTR
chr7:14191170-14191195 (-)	14191170	11160	Known 3'UTR
chr14:27728128-27728158 (+)	27728150	11159	Known 3'UTR
chr18:34421713-34421740 (+)	34421742	11156	Known 3'UTR
chr18:32890481-32890508 (-)	32890477	11127	Known 3'UTR
chr23:16820081-16820111 (-)	16820086	11121	Novel 3'UTR
chr10:19619512-19619536 (+)	19619538	11110	Known 3'UTR
chr15:5678206-5678231 (-)	5678208	11103	Known 3'UTR
chr6:49917920-49917947 (+)	49917952	11100	Known 3'UTR
chr3:26666382-26666405 (-)	26666382	11097	Novel 3'UTR
chr19:31046181-31046207 (+)	31046209	11065	Known 3'UTR
chr17:1351946-1351974 (+)	1351974	11061	Known 3'UTR
chr2:29892306-29892329 (-)	29892308	11045	Known 3'UTR
chr14:7871424-7871450 (+)	7871450	11021	Novel 3'UTR
chr9:36975100-36975122 (+)	36975122	11017	Known 3'UTR
chr19:34305938-34305962 (-)	34305940	10999	Known 3'UTR
chr25:10710794-10710816 (-)	10710788	10995	Novel 3'UTR
chr19:30564111-30564138 (+)	30564138	10989	Known 3'UTR
chr3:30605472-30605500 (-)	30605472	10987	Known 3'UTR
chr3:30351642-30351673 (+)	30351674	10927	Known 3'UTR
chr20:49073175-49073200 (+)	49073203	10912	Novel 3'UTR
chr12:23043474-23043503 (+)	23043503	10879	Known 3'UTR
chr3:1991503-1991526 (+)	1991530	10834	Novel 3'UTR
chr14:22243470-22243497 (+)	22243497	10829	Known 3'UTR
chr4:29661787-29661817 (+)	29661817	10817	Known 3'UTR
chr19:22298342-22298373 (-)	22298344	10804	Known 3'UTR
chr18:32802231-32802258 (-)	32802233	10802	Known 3'UTR
chr7:14202789-14202821 (-)	14202795	10780	Unannotated region
chr12:17684087-17684118 (-)	17684091	10766	Known 3'UTR
chr5:25928905-25928931 (+)	25928926	10762	Known 3'UTR
chr6:29508822-29508845 (+)	29508836	10756	Known 3'UTR
chr6:8038098-8038123 (-)	8038093	10755	Known 3'UTR
chr17:49099288-49099319 (-)	49099291	10740	Unannotated region
chr19:5991634-5991662 (-)	5991627	10728	Known 3'UTR
chr7:23987878-23987908 (+)	23987906	10720	Known 3'UTR
chr10:33013053-33013081 (+)	33013087	10720	Known 3'UTR
chr19:45040521-45040552 (-)	45040524	10702	Known 3'UTR
chr13:18561781-18561807 (+)	18561799	10698	Known 3'UTR
chr13:25695899-25695925 (-)	25695896	10681	Known 3'UTR
Zv9_scaffold3539:43798-43823 (-)	43799	10671	Known 3'UTR
chr8:37682349-37682375 (+)	37682375	10655	Known 3'UTR
chr20:30957316-30957344 (-)	30957322	10642	Known 3'UTR
chr11:25839786-25839816 (+)	25839818	10637	Known 3'UTR
chr19:11721331-11721361 (-)	11721335	10625	Known 3'UTR
chr7:31875023-31875048 (-)	31875023	10605	Known 3'UTR
chr2:9297504-9297533 (-)	9297498	10605	Novel 3'UTR
chr2:23553488-23553516 (+)	23553509	10597	Known 3'UTR
chr10:22245296-22245324 (+)	22245326	10588	Known 3'UTR
chr10:6215855-6215885 (+)	6215878	10577	Known 3'UTR
chr3:40584232-40584260 (+)	40584268	10556	Known 3'UTR
chr21:4041157-4041186 (-)	4041164	10556	Known 3'UTR
chr4:13997722-13997753 (+)	13997750	10550	Known 3'UTR
chr5:26179551-26179581 (-)	26179554	10533	Known 3'UTR
chr21:26058289-26058312 (+)	26058312	10516	Known 3'UTR
chr10:11285868-11285892 (-)	11285868	10514	Known 3'UTR
chr11:40381824-40381852 (+)	40381846	10509	Known 3'UTR
chr21:33095463-33095491 (+)	33095491	10503	Novel 3'UTR
Zv9_NA165:377-403 (+)	403	10501	Unannotated region
chr11:3955376-3955404 (-)	3955378	10488	Known 3'UTR
chr19:8068185-8068215 (-)	8068188	10472	Known 3'UTR
chr8:24241548-24241574 (+)	24241583	10454	Known 3'UTR
chr12:4975637-4975666 (-)	4975645	10416	Known 3'UTR
chr3:19103750-19103779 (+)	19103775	10407	Known 3'UTR
chr12:11543981-11544007 (-)	11543983	10399	Known 3'UTR
chr16:8034033-8034064 (-)	8034038	10382	Known 3'UTR
chr23:10280090-10280113 (-)	10280088	10371	Known 3'UTR
chr24:34971176-34971199 (-)	34971182	10343	Known 3'UTR
chr21:3192724-3192751 (-)	3192723	10338	Known 3'UTR
chr23:20401930-20401953 (-)	20401929	10329	Known 3'UTR
chr4:27844-27868 (+)	27874	10323	Novel 3'UTR
chr19:17154642-17154666 (-)	17154640	10311	Known 3'UTR
chr23:20953059-20953088 (+)	20953085	10299	Known 3'UTR
chr16:50601118-50601147 (-)	50601120	10267	Known 3'UTR
chr1:44849949-44849976 (+)	44849977	10266	Known 3'UTR
chr8:26078533-26078562 (-)	26078533	10259	Known 3'UTR
chr2:35700759-35700790 (+)	35700787	10257	Novel 3'UTR
chr15:4860164-4860193 (+)	4860187	10257	Novel 3'UTR
chr5:43741384-43741412 (-)	43741392	10249	Known 3'UTR
chr15:2630154-2630182 (-)	2630160	10236	Known 3'UTR
chr12:24027790-24027812 (+)	24027812	10228	Known 3'UTR
chr1:21646339-21646366 (+)	21646365	10212	Known 3'UTR
chr13:36282168-36282197 (-)	36282175	10192	Known 3'UTR
chr22:32548210-32548236 (-)	32548213	10186	Known 3'UTR
chr9:23161848-23161876 (-)	23161852	10184	Known 3'UTR
chr14:43002995-43003021 (-)	43002998	10174	Known 3'UTR
chr2:28027081-28027108 (+)	28027104	10170	Unannotated region
chr1:22347294-22347320 (+)	22347322	10163	Known 3'UTR
chr21:12123092-12123120 (+)	12123116	10146	Known 3'UTR
chr10:19600532-19600558 (+)	19600566	10141	Novel 3'UTR
chr9:39214363-39214391 (+)	39214386	10128	Known 3'UTR
chr7:1757039-1757065 (+)	1757060	10124	Known 3'UTR
chr19:45303200-45303227 (+)	45303226	10117	Known 3'UTR
chr3:25201967-25201989 (+)	25201989	10107	Known 3'UTR
chr3:40255763-40255791 (-)	40255754	10100	Known 3'UTR
chr9:49030695-49030719 (-)	49030697	10098	Known 3'UTR
chr2:31480044-31480072 (-)	31480048	10096	Known 3'UTR
chr5:38545419-38545448 (-)	38545427	10094	Novel 3'UTR
chr12:1211474-1211502 (-)	1211474	10081	Known 3'UTR
chr4:15854022-15854050 (+)	15854050	10074	Unannotated region
chr7:58874326-58874347 (-)	58874321	10067	Known 3'UTR
chr17:6476619-6476647 (-)	6476615	10062	Novel 3'UTR
chr12:4644857-4644884 (-)	4644864	10059	Known 3'UTR
chr23:18103832-18103859 (+)	18103860	10056	Known 3'UTR
chr13:4650061-4650089 (-)	4650061	10036	Novel 3'UTR
chr19:16724681-16724707 (-)	16724680	10035	Known 3'UTR
chr16:26155251-26155280 (+)	26155271	10030	Known 3'UTR
chr11:21987883-21987909 (-)	21987881	10029	Known 3'UTR
chr12:27468001-27468029 (-)	27468001	10025	Known 3'UTR
chr19:24977963-24977990 (+)	24977990	10005	Known 3'UTR
chr6:41010863-41010892 (-)	41010868	9994	Known 3'UTR
chr14:29547514-29547543 (+)	29547541	9993	Novel 3'UTR
chr19:44693829-44693856 (+)	44693855	9984	Known 3'UTR
chr2:14895840-14895869 (+)	14895877	9960	Known 3'UTR
chr12:21992686-21992709 (+)	21992709	9959	Known 3'UTR
chr24:40751720-40751748 (+)	40751750	9958	Known 3'UTR
chrM:12795-12822 (+)	12822	9941	Mitochondria
chr5:32340877-32340905 (+)	32340905	9919	Known 3'UTR
chr12:40104539-40104570 (+)	40104567	9894	Known 3'UTR
chr9:58106891-58106918 (-)	58106891	9867	Novel 3'UTR
chr14:24612356-24612383 (+)	24612390	9857	Known 3'UTR
chr10:17976352-17976380 (+)	17976378	9839	Known 3'UTR
chr24:27081112-27081136 (-)	27081119	9837	Known 3'UTR
chr24:43808617-43808644 (-)	43808617	9804	Unannotated region
chr11:26245213-26245241 (+)	26245237	9802	Known 3'UTR
chr3:24509836-24509866 (+)	24509862	9801	Known 3'UTR
chr13:11729948-11729977 (-)	11729946	9782	Novel 3'UTR
chr24:11691798-11691828 (+)	11691830	9769	Known 3'UTR
chr3:23720203-23720232 (-)	23720197	9741	Known 3'UTR
chr6:57428426-57428451 (-)	57428425	9724	Known 3'UTR
chr5:24937049-24937077 (-)	24937057	9724	Known 3'UTR
chr21:9926949-9926976 (+)	9926971	9721	Known 3'UTR
chr5:42126831-42126858 (+)	42126861	9693	Known 3'UTR
chr10:9510453-9510482 (+)	9510476	9692	Known 3'UTR
chrM:4923-4953 (-)	4922	9661	Mitochondria
chr3:15059919-15059944 (-)	15059913	9657	Known 3'UTR
chr24:35832745-35832772 (-)	35832742	9622	Known 3'UTR
chr7:25374853-25374879 (+)	25374877	9619	Known 3'UTR
chr19:2001115-2001141 (+)	2001149	9610	Known 3'UTR
chr23:4323033-4323060 (+)	4323058	9584	Known 3'UTR
chr3:7007068-7007096 (+)	7007090	9579	Known 3'UTR
chr8:12011341-12011371 (+)	12011371	9574	Known 3'UTR
chr9:11830593-11830619 (-)	11830593	9568	Known 3'UTR
chr18:43242821-43242846 (-)	43242828	9559	Known 3'UTR
chr13:18373416-18373443 (+)	18373440	9556	Known 3'UTR
chr21:31224713-31224743 (-)	31224719	9555	Known 3'UTR
chr5:13926391-13926423 (-)	13926391	9554	Known 3'UTR
chr11:12826532-12826559 (+)	12826558	9527	Known 3'UTR
chr24:9694494-9694521 (+)	9694524	9526	Known 3'UTR
chr9:35217686-35217714 (-)	35217690	9503	Known 3'UTR
chr13:21806726-21806754 (-)	21806733	9497	Known 3'UTR
chr21:25146872-25146897 (+)	25146897	9494	Known 3'UTR
chr6:52192316-52192344 (+)	52192347	9491	Known 3'UTR
chr7:20783225-20783251 (-)	20783225	9473	Unannotated region
chr23:14305534-14305562 (-)	14305538	9469	Known 3'UTR
chr21:29535243-29535272 (-)	29535243	9461	Known 3'UTR
chr16:35959385-35959416 (-)	35959383	9447	Known 3'UTR
chr14:27237451-27237477 (+)	27237479	9447	Known 3'UTR
chr13:45321803-45321828 (-)	45321802	9444	Known 3'UTR
chr18:20346661-20346691 (+)	20346682	9441	Known 3'UTR
chr11:25278952-25278979 (+)	25278977	9439	Known 3'UTR
chr14:45848384-45848410 (-)	45848375	9429	Known 3'UTR
chr25:17129587-17129618 (-)	17129587	9414	Known 3'UTR
chr8:21633144-21633168 (-)	21633144	9411	Known 3'UTR
chr7:50120653-50120678 (-)	50120653	9406	Known 3'UTR
chr2:24537027-24537055 (+)	24537058	9404	Known 3'UTR
chr17:12960701-12960724 (+)	12960724	9357	Known 3'UTR
chr25:32119037-32119065 (+)	32119057	9357	Known 3'UTR
chr15:9375125-9375155 (-)	9375127	9352	Known 3'UTR
chr9:53979290-53979320 (+)	53979320	9345	Novel 3'UTR
chr5:1413490-1413521 (-)	1413483	9340	Known 3'UTR
chr14:32727655-32727679 (-)	32727655	9329	Known 3'UTR
chr19:49858226-49858255 (-)	49858224	9324	Known 3'UTR
chr13:46102162-46102192 (+)	46102189	9321	Known 3'UTR
chr22:40333595-40333621 (-)	40333601	9311	Known 3'UTR
chr12:33407776-33407803 (-)	33407776	9298	Known 3'UTR
chr1:15396032-15396061 (+)	15396056	9293	Known 3'UTR
chr1:52196043-52196066 (-)	52196037	9292	Known 3'UTR
chr8:43206072-43206102 (-)	43206072	9290	Known 3'UTR
chr5:64882631-64882656 (+)	64882662	9288	Novel 3'UTR
chr6:52290454-52290485 (-)	52290457	9282	Known 3'UTR
chr22:25256496-25256526 (-)	25256487	9279	Known 3'UTR
chr14:34449656-34449686 (-)	34449655	9272	Known 3'UTR
chr3:49649787-49649813 (+)	49649822	9250	Known 3'UTR
chr2:51887234-51887262 (+)	51887263	9248	Unannotated region
chr10:22032125-22032150 (+)	22032150	9244	Mitochondria
chr18:49386752-49386776 (+)	49386776	9239	Known 3'UTR
chr2:23065423-23065443 (+)	23065449	9231	Known 3'UTR
chr16:34058642-34058666 (+)	34058666	9222	Known 3'UTR
chr21:15543221-15543247 (-)	15543221	9218	Known 3'UTR
chr14:27476302-27476328 (-)	27476299	9218	Known 3'UTR
chr25:32878821-32878846 (-)	32878820	9217	Known 3'UTR
chr4:60264555-60264583 (+)	60264583	9210	Novel 3'UTR
chr25:37346617-37346646 (+)	37346648	9194	Unannotated region
chr13:13601555-13601584 (+)	13601584	9191	Novel 3'UTR
chr11:1512495-1512524 (-)	1512492	9185	Known 3'UTR
chr2:24712931-24712962 (+)	24712958	9172	Novel 3'UTR
chr6:49845157-49845185 (-)	49845157	9133	Known 3'UTR
chr7:56228056-56228078 (+)	56228078	9132	Known 3'UTR
chr5:25868116-25868146 (-)	25868115	9132	Known 3'UTR
chr21:10382627-10382652 (-)	10382622	9132	Novel 3'UTR
chr2:363200-363231 (-)	363196	9112	Unannotated region
chr10:43905937-43905966 (+)	43905962	9107	Known 3'UTR
chr3:37553273-37553301 (-)	37553273	9095	Known 3'UTR
chr4:15061543-15061574 (+)	15061577	9089	Known 3'UTR
chr18:4664246-4664270 (-)	4664244	9077	Known 3'UTR
chr9:22300026-22300051 (-)	22300029	9055	Known 3'UTR
chr13:2172586-2172613 (+)	2172612	9051	Known 3'UTR
chr22:12891579-12891603 (-)	12891579	9045	Known 3'UTR
chr23:25588789-25588820 (+)	25588820	9036	Known 3'UTR
chr11:21354885-21354915 (+)	21354919	9026	Known 3'UTR
chr4:7451259-7451286 (-)	7451259	9011	Known 3'UTR
chr3:35080243-35080270 (+)	35080279	9005	Known 3'UTR
chr20:34819253-34819282 (-)	34819252	9001	Known 3'UTR
chr4:19111833-19111860 (-)	19111831	8999	Known 3'UTR
chr22:793037-793065 (-)	793042	8984	Known 3'UTR
chr3:34330294-34330319 (+)	34330319	8982	Known 3'UTR
chr18:5955264-5955293 (+)	5955293	8950	Known 3'UTR
chr10:26825244-26825274 (-)	26825242	8949	Known 3'UTR
chr23:28631379-28631406 (+)	28631402	8943	Known 3'UTR
chr4:8254312-8254339 (+)	8254337	8935	Known 3'UTR
chr10:7004088-7004112 (-)	7004088	8915	Known 3'UTR
chr4:470797-470828 (-)	470796	8884	Novel 3'UTR
chr2:23376506-23376531 (+)	23376531	8866	Novel 3'UTR
chr2:25991597-25991628 (+)	25991620	8860	Novel 3'UTR
chr16:41395315-41395339 (+)	41395345	8852	Known 3'UTR
chr21:40509532-40509561 (-)	40509532	8838	Known 3'UTR
chr15:15085111-15085139 (-)	15085111	8835	Known 3'UTR
chr1:40663042-40663069 (+)	40663072	8832	Known 3'UTR
chr12:14437565-14437592 (-)	14437570	8831	Known 3'UTR
chr17:8786875-8786900 (+)	8786899	8831	Known 3'UTR
chr7:36517564-36517593 (-)	36517567	8830	Novel 3'UTR
chr5:67519127-67519157 (-)	67519127	8825	Known 3'UTR
chr10:40428479-40428507 (+)	40428500	8808	Novel 3'UTR
chr16:44753494-44753518 (-)	44753494	8803	Known 3'UTR
chr19:28766864-28766893 (-)	28766873	8788	Known 3'UTR
chr21:42051588-42051615 (-)	42051590	8784	Novel 3'UTR
chr5:31729495-31729526 (+)	31729519	8783	Known 3'UTR
chr21:25924888-25924918 (+)	25924920	8782	Known 3'UTR
chr10:42187907-42187936 (-)	42187909	8779	Known 3'UTR
chr13:15636620-15636648 (-)	15636616	8774	Known 3'UTR
chr24:10673552-10673578 (+)	10673578	8769	Known 3'UTR
chr20:51457940-51457968 (+)	51457975	8761	Known 3'UTR
chr22:12286808-12286830 (+)	12286830	8756	Known 3'UTR
chr10:37242184-37242211 (-)	37242184	8753	Known 3'UTR
chr24:7859841-7859864 (+)	7859864	8750	Known 3'UTR
chr21:7851968-7851997 (+)	7852004	8743	Known 3'UTR
chr25:6788863-6788891 (-)	6788855	8709	Known 3'UTR
chr14:22695052-22695080 (+)	22695077	8696	Novel 3'UTR
chrM:290-314 (-)	291	8677	Mitochondria
chr5:42743325-42743353 (-)	42743322	8667	Known 3'UTR
chr13:33894418-33894442 (-)	33894418	8647	Known 3'UTR
chr20:35462522-35462543 (+)	35462540	8630	Known 3'UTR
chr24:3241691-3241720 (+)	3241720	8621	Known 3'UTR
chr3:53869336-53869363 (+)	53869362	8619	Known 3'UTR
chr12:11446921-11446950 (-)	11446921	8613	Known 3'UTR
chr12:11719383-11719408 (+)	11719410	8605	Novel 3'UTR
chr20:26074857-26074887 (-)	26074865	8586	Known 3'UTR
chr5:24816563-24816590 (+)	24816599	8542	Known 3'UTR
chr19:18309665-18309691 (-)	18309668	8522	Known 3'UTR
chr5:25730715-25730739 (+)	25730739	8513	Known 3'UTR
chr23:44653395-44653420 (-)	44653397	8505	Known 3'UTR
chr21:15541017-15541043 (+)	15541044	8496	Known 3'UTR
chrM:1986-2012 (+)	2004	8491	Mitochondria
chr7:67938794-67938820 (+)	67938815	8490	Novel 3'UTR
chr19:2001018-2001046 (+)	2001038	8476	Novel 3'UTR
chr3:32817072-32817101 (+)	32817101	8459	Known 3'UTR
chr1:989324-989353 (-)	989326	8454	Novel 3'UTR
chr25:4189670-4189696 (-)	4189670	8444	Novel 3'UTR
chr4:5213051-5213077 (+)	5213077	8439	Known 3'UTR
chr7:27759902-27759928 (+)	27759928	8427	Known 3'UTR
chr7:76658320-76658347 (+)	76658353	8427	Unannotated region
chr25:38449473-38449500 (+)	38449508	8421	Known 3'UTR
chr21:26103354-26103381 (-)	26103359	8399	Known 3'UTR
chr16:47879732-47879757 (-)	47879732	8396	Known 3'UTR
chr10:16984975-16985004 (+)	16985011	8395	Known 3'UTR
chr23:27918118-27918144 (+)	27918151	8394	Known 3'UTR
chr7:31296829-31296858 (+)	31296863	8389	Novel 3'UTR
chr12:7909574-7909602 (-)	7909576	8365	Known 3'UTR
chr13:27548605-27548635 (+)	27548635	8359	Known 3'UTR
chr19:3118814-3118840 (+)	3118836	8331	Known 3'UTR
chr12:35462662-35462689 (-)	35462654	8325	Known 3'UTR
chr3:23528110-23528137 (+)	23528139	8304	Known 3'UTR
chr14:51229711-51229737 (+)	51229734	8303	Known 3'UTR
chr24:37031301-37031328 (-)	37031304	8302	Known 3'UTR
chr7:4261603-4261629 (-)	4261603	8301	Known 3'UTR
chr3:18105205-18105232 (-)	18105209	8300	Known 3'UTR
chr5:75257608-75257633 (+)	75257641	8299	Known 3'UTR
chr16:54740020-54740048 (+)	54740048	8284	Known 3'UTR
chr25:6324551-6324579 (-)	6324551	8276	Known 3'UTR
chr23:17284790-17284814 (+)	17284807	8247	Known 3'UTR
chr16:34146550-34146580 (+)	34146577	8241	Known 3'UTR
chr20:43807556-43807584 (-)	43807555	8235	Known 3'UTR
chr22:27551688-27551714 (-)	27551691	8226	Known 3'UTR
chr13:52297560-52297586 (+)	52297590	8222	Known 3'UTR
chr17:37553323-37553353 (-)	37553326	8218	Known 3'UTR
chr12:34831663-34831694 (+)	34831694	8218	Known 3'UTR
chr18:7016464-7016488 (+)	7016488	8210	Known 3'UTR
chr23:4753694-4753723 (-)	4753698	8209	Known 3'UTR
chr10:7080495-7080522 (-)	7080495	8204	Known 3'UTR
chr6:39996074-39996104 (-)	39996074	8199	Known 3'UTR
chr12:28808028-28808054 (+)	28808057	8191	Known 3'UTR
chr3:29694369-29694398 (+)	29694390	8174	Known 3'UTR
chr15:46787131-46787158 (+)	46787157	8147	Known 3'UTR
chr22:18767297-18767323 (-)	18767296	8146	Known 3'UTR
chr11:37183782-37183813 (-)	37183789	8144	Known 3'UTR
chr22:6955894-6955921 (-)	6955888	8134	Known 3'UTR
chr11:28694926-28694957 (-)	28694921	8114	Known 3'UTR
chr10:15350105-15350133 (-)	15350102	8111	Known 3'UTR
chr5:38695588-38695616 (+)	38695616	8102	Known 3'UTR
chr4:22059257-22059281 (+)	22059275	8088	Novel 3'UTR
chr10:3427332-3427360 (-)	3427337	8067	Known 3'UTR
chr19:10921540-10921567 (-)	10921538	8059	Known 3'UTR
chr7:60624253-60624281 (-)	60624251	8041	Known 3'UTR
chr17:25322030-25322059 (+)	25322062	8032	Known 3'UTR
chr1:1488314-1488345 (+)	1488349	8005	Known 3'UTR
chr21:29153632-29153657 (-)	29153628	8001	Novel 3'UTR
chr3:31220875-31220900 (-)	31220880	7985	Novel 3'UTR
chr22:26191723-26191749 (+)	26191750	7965	Known 3'UTR
chr21:19230529-19230558 (+)	19230558	7965	Known 3'UTR
chr10:15059969-15059996 (+)	15059995	7941	Known 3'UTR
chr2:9940706-9940732 (+)	9940732	7938	Known 3'UTR
chr2:9473390-9473412 (-)	9473389	7932	Novel 3'UTR
chr4:24260425-24260455 (-)	24260432	7926	Known 3'UTR
chr22:26169114-26169139 (+)	26169141	7922	Unannotated region
chr11:3299300-3299327 (+)	3299327	7920	Known 3'UTR
chr1:51500180-51500209 (+)	51500207	7919	Known 3'UTR
chr1:485384-485410 (-)	485388	7917	Known 3'UTR
chr16:26840429-26840461 (-)	26840438	7913	Unannotated region
chr9:231535-231560 (+)	231563	7912	Known 3'UTR
chr25:13540933-13540959 (-)	13540931	7908	Known 3'UTR
chr14:22983713-22983739 (-)	22983715	7907	Known 3'UTR
chr15:24834884-24834913 (-)	24834884	7906	Known 3'UTR
chr9:56199737-56199762 (+)	56199762	7898	Known 3'UTR
chr21:29145846-29145874 (-)	29145845	7898	Known 3'UTR
chr23:45540336-45540363 (+)	45540360	7870	Known 3'UTR
chr13:25626623-25626650 (+)	25626658	7870	Known 3'UTR
chr22:26262241-26262266 (+)	26262268	7868	Known 3'UTR
Zv9_NA192:22325-22352 (+)	22350	7865	Novel 3'UTR
chr10:46484714-46484737 (+)	46484741	7861	Known 3'UTR
chr25:17703663-17703695 (+)	17703687	7845	Known 3'UTR
chr18:16609889-16609916 (-)	16609892	7844	Known 3'UTR
chr21:26125629-26125654 (+)	26125658	7840	Known 3'UTR
chr18:24773970-24773996 (-)	24773967	7834	Unannotated region
chr24:6216529-6216554 (-)	6216525	7805	Known 3'UTR
chr18:35623602-35623629 (-)	35623601	7799	Known 3'UTR
chr10:6570223-6570250 (+)	6570246	7789	Known 3'UTR
chr18:39059009-39059039 (-)	39059004	7778	Known 3'UTR
chr19:36981560-36981586 (-)	36981557	7773	Known 3'UTR
chr4:61298469-61298499 (-)	61298474	7773	Repeat
chr11:37056509-37056535 (-)	37056513	7765	Known 3'UTR
chr23:36405614-36405642 (+)	36405649	7762	Known 3'UTR
chr19:48588-48613 (+)	48614	7756	Known 3'UTR
chr7:26146930-26146957 (-)	26146930	7753	Known 3'UTR
chr2:10133498-10133526 (-)	10133495	7751	Known 3'UTR
chr12:1642750-1642774 (-)	1642745	7747	Novel 3'UTR
chr8:7854035-7854060 (+)	7854060	7741	Known 3'UTR
chr5:22227227-22227258 (-)	22227219	7730	Known 3'UTR
chr12:1044226-1044252 (-)	1044230	7723	Known 3'UTR
chr5:33936242-33936268 (-)	33936242	7723	Known 3'UTR
chr5:44581257-44581285 (+)	44581285	7710	Known 3'UTR
chr8:11698030-11698059 (+)	11698059	7709	Known 3'UTR
chr19:12786551-12786579 (-)	12786556	7679	Known 3'UTR
chr16:26202720-26202750 (+)	26202750	7672	Known 3'UTR
chr6:52176073-52176101 (+)	52176103	7670	Novel 3'UTR
chr23:39890357-39890381 (-)	39890357	7662	Novel 3'UTR
chr25:33769844-33769868 (+)	33769870	7647	Known 3'UTR
chr6:12211110-12211140 (-)	12211109	7642	Known 3'UTR
chr2:32371843-32371867 (-)	32371845	7630	Known 3'UTR
chr13:9216660-9216684 (+)	9216678	7630	Known 3'UTR
chr5:72581739-72581768 (-)	72581741	7629	Known 3'UTR
chr16:11904520-11904547 (-)	11904520	7623	Known 3'UTR
chr13:997037-997064 (+)	997065	7602	Novel 3'UTR
chr3:32667957-32667986 (+)	32667979	7601	Unannotated region
chr21:29032633-29032661 (-)	29032630	7598	Known 3'UTR
chr2:689-712 (+)	710	7589	Unannotated region
chr24:22250775-22250804 (+)	22250805	7583	Known 3'UTR
chr24:2560147-2560177 (+)	2560172	7582	Novel 3'UTR
chr13:4705575-4705599 (+)	4705600	7571	Known 3'UTR
chr13:184766-184792 (+)	184798	7563	Known 3'UTR
chr19:36565374-36565403 (+)	36565404	7562	Known 3'UTR
chr15:1745050-1745080 (-)	1745050	7552	Known 3'UTR
chr5:72507440-72507472 (-)	72507443	7533	Known 3'UTR
chr21:10379295-10379321 (+)	10379321	7528	Known 3'UTR
chr5:75244055-75244086 (-)	75244061	7527	Known 3'UTR
chr2:8447419-8447444 (+)	8447444	7521	Known 3'UTR
chr15:6013853-6013882 (+)	6013882	7520	Novel 3'UTR
chr2:31168303-31168327 (+)	31168327	7497	Known 3'UTR
chr4:58941467-58941494 (-)	58941464	7491	Unannotated region
chr5:43103857-43103888 (-)	43103862	7486	Known 3'UTR
chr7:57985552-57985581 (+)	57985581	7475	Known 3'UTR
chr12:14329460-14329487 (+)	14329484	7471	Known 3'UTR
chr14:43492012-43492041 (-)	43492019	7460	Known 3'UTR
chr1:380284-380310 (+)	380314	7459	Known 3'UTR
chr14:11659604-11659628 (+)	11659628	7436	Known 3'UTR
chr10:14457998-14458025 (+)	14458033	7429	Known 3'UTR
chr9:1672689-1672713 (+)	1672713	7427	Known 3'UTR
chr20:33532823-33532846 (-)	33532823	7420	Known 3'UTR
chr16:34405122-34405147 (+)	34405142	7410	Known 3'UTR
chr23:22971958-22971986 (+)	22971986	7395	Novel 3'UTR
chr6:52993847-52993874 (-)	52993846	7391	Known 3'UTR
chr14:150832-150857 (-)	150829	7386	Known 3'UTR
chr20:46787595-46787623 (-)	46787595	7385	Known 3'UTR
chr18:16385346-16385372 (+)	16385372	7384	Known 3'UTR
chr1:19648159-19648188 (-)	19648162	7380	Known 3'UTR
chr15:44559302-44559329 (-)	44559302	7379	Novel 3'UTR
chr6:6712781-6712811 (+)	6712811	7349	Known 3'UTR
chr21:19205771-19205796 (-)	19205765	7339	Novel 3'UTR
chr16:34037178-34037207 (-)	34037176	7338	Known 3'UTR
chr1:54432505-54432527 (-)	54432505	7329	Known 3'UTR
chr10:21524332-21524362 (+)	21524364	7329	Novel 3'UTR
chr22:21989578-21989604 (+)	21989611	7324	Known 3'UTR
chr17:28143508-28143539 (-)	28143503	7322	Known 3'UTR
chr14:48280115-48280145 (-)	48280114	7322	Novel 3'UTR
chr19:49810204-49810235 (-)	49810209	7318	Novel 3'UTR
chr21:42057732-42057759 (-)	42057729	7311	Novel 3'UTR
chr8:46941557-46941584 (+)	46941582	7310	Known 3'UTR
chr14:49049702-49049732 (-)	49049708	7307	Unannotated region
chr9:19350564-19350586 (-)	19350564	7295	Known 3'UTR
chr3:27791913-27791943 (+)	27791941	7290	Novel 3'UTR
chrM:1066-1093 (+)	1092	7277	Mitochondria
chr5:25245249-25245275 (-)	25245259	7269	Known 3'UTR
chr19:37007189-37007219 (-)	37007182	7265	Known 3'UTR
chr16:15788089-15788116 (+)	15788115	7258	Known 3'UTR
chr22:21449885-21449910 (-)	21449888	7251	Known 3'UTR
chr3:55950124-55950152 (-)	55950129	7248	Known 3'UTR
chr6:28811161-28811188 (+)	28811185	7245	Known 3'UTR
chr2:57368918-57368944 (-)	57368918	7245	Known 3'UTR
chr17:10511330-10511355 (-)	10511336	7243	Known 3'UTR
chr5:57275953-57275980 (-)	57275953	7228	Known 3'UTR
chr1:492498-492528 (-)	492496	7228	Novel 3'UTR
chr11:4055585-4055613 (+)	4055611	7227	Known 3'UTR
chr17:28760361-28760392 (+)	28760392	7224	Known 3'UTR
chr4:15975077-15975106 (+)	15975106	7220	Known 3'UTR
chr13:2206942-2206971 (-)	2206941	7215	Known 3'UTR
chr5:36193368-36193395 (+)	36193399	7210	Known 3'UTR
chr12:10859031-10859059 (+)	10859059	7210	Known 3'UTR
chr14:26992513-26992535 (-)	26992513	7205	Known 3'UTR
chr5:38339643-38339672 (+)	38339672	7197	Known 3'UTR
chr22:12520609-12520637 (+)	12520637	7197	Known 3'UTR
chr19:2992355-2992383 (-)	2992352	7196	Known 3'UTR
chr11:37248629-37248657 (+)	37248654	7194	Known 3'UTR
chr7:19196928-19196953 (+)	19196953	7180	Known 3'UTR
chr2:4353807-4353831 (+)	4353827	7179	Known 3'UTR
chr8:55511712-55511736 (+)	55511737	7173	Known 3'UTR
chr17:43075109-43075137 (-)	43075109	7161	Known 3'UTR
chr7:30523244-30523268 (+)	30523268	7156	Novel 3'UTR
chr25:30047196-30047225 (-)	30047196	7152	Known 3'UTR
chr16:48968497-48968524 (-)	48968491	7147	Known 3'UTR
chr17:51367477-51367503 (+)	51367503	7134	Novel 3'UTR
chr22:25715951-25715974 (+)	25715974	7128	Known 3'UTR
chr1:24928735-24928762 (-)	24928734	7109	Known 3'UTR
chr9:44222903-44222931 (-)	44222897	7108	Known 3'UTR
chr16:32712345-32712375 (-)	32712337	7104	Known 3'UTR
chr20:16701285-16701312 (+)	16701314	7101	Known 3'UTR
chr2:33667822-33667846 (+)	33667846	7100	Known 3'UTR
chr10:7087708-7087737 (-)	7087700	7090	Known 3'UTR
chr7:25377182-25377209 (-)	25377177	7090	Known 3'UTR
chr20:47081829-47081860 (-)	47081829	7090	Novel 3'UTR
chr20:39383829-39383859 (+)	39383857	7072	Known 3'UTR
chr19:5775044-5775071 (+)	5775073	7070	Unannotated region
chr8:2781140-2781166 (-)	2781135	7067	Known 3'UTR
chr1:576784-576814 (-)	576789	7062	Known 3'UTR
chr9:53979418-53979445 (+)	53979445	7052	Novel 3'UTR
chr3:32787232-32787256 (+)	32787254	7051	Known 3'UTR
chr3:8436595-8436624 (+)	8436624	7047	Known 3'UTR
chr8:24732538-24732566 (+)	24732567	7045	Novel 3'UTR
chr10:24804085-24804115 (-)	24804083	7044	Known 3'UTR
chr16:25627881-25627909 (+)	25627912	7043	Known 3'UTR
chr8:53629093-53629122 (-)	53629091	7040	Known 3'UTR
chr3:32825542-32825569 (+)	32825567	7034	Known 3'UTR
chr14:18587706-18587731 (-)	18587706	7024	Known 3'UTR
chr3:17376815-17376840 (-)	17376815	7023	Known 3'UTR
chr19:28437059-28437087 (-)	28437055	7023	Known 3'UTR
chr21:42557038-42557067 (-)	42557035	7019	Known 3'UTR
chr21:20126838-20126868 (+)	20126869	7016	Known 3'UTR
chr13:50542128-50542152 (-)	50542126	7016	Known 3'UTR
chr1:1493166-1493193 (+)	1493199	7005	Novel 3'UTR
chr9:8332458-8332488 (-)	8332456	7004	Known 3'UTR
chr20:54639613-54639639 (-)	54639613	7002	Known 3'UTR
chr3:21461594-21461623 (-)	21461594	6999	Novel 3'UTR
chr25:29941850-29941876 (-)	29941849	6997	Known 3'UTR
chr6:7467928-7467953 (+)	7467953	6997	Known 3'UTR
chr13:8679134-8679160 (-)	8679134	6996	Known 3'UTR
chr8:51430612-51430643 (-)	51430613	6996	Known 3'UTR
chr12:17986366-17986390 (-)	17986366	6979	Known 3'UTR
chr21:11428689-11428720 (-)	11428693	6973	Known 3'UTR
chr3:39607972-39608001 (+)	39608003	6972	Known 3'UTR
chrM:6422-6447 (-)	6424	6970	Mitochondria
chr20:54322504-54322531 (-)	54322501	6960	Novel 3'UTR
chr11:2025038-2025067 (-)	2025044	6956	Known 3'UTR
chr5:58767849-58767879 (+)	58767872	6954	Known 3'UTR
chr1:21421855-21421885 (-)	21421850	6952	Known 3'UTR
chr19:49796253-49796284 (-)	49796245	6951	Known 3'UTR
chr7:17351488-17351517 (-)	17351484	6947	Known 3'UTR
chr20:14373705-14373730 (-)	14373705	6939	Known 3'UTR
chr9:55768857-55768886 (+)	55768886	6939	Novel 3'UTR
chr19:44619256-44619285 (+)	44619288	6938	Known 3'UTR
chr3:35618638-35618663 (+)	35618661	6936	Known 3'UTR
chr13:1014624-1014652 (-)	1014631	6930	Known 3'UTR
chr13:30392466-30392496 (+)	30392497	6929	Known 3'UTR
chr23:4753683-4753711 (-)	4753687	6925	Known 3'UTR
chr16:57306304-57306334 (-)	57306298	6924	Known 3'UTR
chr23:20097535-20097563 (+)	20097571	6921	Known 3'UTR
chr10:14571349-14571378 (-)	14571357	6918	Known 3'UTR
chr2:36357672-36357703 (+)	36357699	6917	Known 3'UTR
chr12:17809765-17809790 (-)	17809766	6913	Unannotated region
chr9:23835492-23835520 (+)	23835515	6908	Known 3'UTR
chr16:22890363-22890388 (-)	22890363	6907	Known 3'UTR
chr14:37904173-37904202 (-)	37904173	6907	Novel 3'UTR
chr5:58896074-58896104 (+)	58896112	6903	Known 3'UTR
chr25:493273-493301 (+)	493303	6897	Known 3'UTR
chr5:4471930-4471959 (+)	4471951	6897	Unannotated region
chr4:5198554-5198583 (+)	5198583	6893	Known 3'UTR
chr14:45834140-45834165 (-)	45834134	6890	Known 3'UTR
chr23:19273708-19273731 (-)	19273708	6855	Known 3'UTR
chr5:38265827-38265855 (+)	38265852	6845	Known 3'UTR
chr8:1383670-1383698 (-)	1383673	6838	Unannotated region
chr25:26772943-26772973 (+)	26772975	6834	Known 3'UTR
chrM:7589-7615 (+)	7607	6831	Mitochondria
chr7:60140488-60140515 (+)	60140512	6829	Novel 3'UTR
chr17:26450202-26450232 (-)	26450202	6815	Known 3'UTR
chr7:75065856-75065879 (-)	75065854	6812	Unannotated region
chr20:13808650-13808681 (+)	13808683	6806	Known 3'UTR
chr14:24617909-24617932 (+)	24617932	6793	Known 3'UTR
chr11:1496113-1496142 (+)	1496136	6792	Known 3'UTR
chr19:11478789-11478814 (-)	11478789	6791	Known 3'UTR
chr21:40170144-40170168 (-)	40170144	6783	Known 3'UTR
chr8:2684704-2684730 (-)	2684696	6783	Known 3'UTR
chr13:52339438-52339464 (-)	52339435	6777	Known 3'UTR
chr2:22134628-22134653 (+)	22134652	6777	Known 3'UTR
chr9:24773861-24773888 (-)	24773854	6772	Known 3'UTR
Zv9_NA237:11393-11421 (-)	11388	6771	Known 3'UTR
chr20:13828533-13828562 (+)	13828562	6753	Known 3'UTR
chr12:17659526-17659552 (-)	17659526	6749	Novel 3'UTR
chr19:12052996-12053022 (-)	12053000	6740	Novel 3'UTR
chr19:12744070-12744094 (-)	12744070	6736	Known 3'UTR
chr8:46922774-46922802 (-)	46922775	6730	Known 3'UTR
chr7:73835486-73835517 (-)	73835483	6722	Known 3'UTR
chr8:49315389-49315416 (-)	49315392	6717	Known 3'UTR
chr4:4107469-4107499 (-)	4107468	6708	Known 3'UTR
chr3:5863296-5863321 (-)	5863296	6708	Known 3'UTR
chr5:25804466-25804492 (+)	25804489	6706	Known 3'UTR
chr8:42715495-42715524 (+)	42715524	6706	Unannotated region
chr20:43778289-43778318 (-)	43778294	6704	Known 3'UTR
chr7:40087922-40087949 (-)	40087925	6703	Known 3'UTR
chr3:15692944-15692972 (-)	15692953	6703	Known 3'UTR
chr8:33224975-33225002 (-)	33224978	6703	Known 3'UTR
chr20:44292513-44292540 (+)	44292540	6703	Novel 3'UTR
chr9:23004662-23004693 (-)	23004669	6702	Known 3'UTR
chr13:38047975-38048000 (-)	38047975	6701	Known 3'UTR
chr17:2352398-2352426 (-)	2352389	6690	Known 3'UTR
chr23:19239670-19239695 (+)	19239692	6680	Known 3'UTR
chr2:19234623-19234649 (+)	19234644	6680	Novel 3'UTR
chr7:53088998-53089023 (-)	53088998	6669	Known 3'UTR
chr16:12532686-12532715 (-)	12532686	6668	Known 3'UTR
chr10:2786021-2786051 (-)	2786019	6667	Novel 3'UTR
chr7:51864796-51864822 (-)	51864795	6659	Known 3'UTR
chr20:33506337-33506364 (-)	33506341	6655	Known 3'UTR
chr23:32139929-32139955 (-)	32139928	6652	Known 3'UTR
Zv9_NA261:5812-5839 (+)	5841	6649	Unannotated region
chr2:31479889-31479917 (-)	31479888	6632	Novel 3'UTR
chr24:40430045-40430076 (-)	40430045	6630	Unannotated region
chr8:17135204-17135234 (-)	17135206	6628	Known 3'UTR
chr7:8305447-8305472 (-)	8305447	6626	Known 3'UTR
chr2:44254307-44254335 (-)	44254299	6612	Known 3'UTR
chr7:34680143-34680172 (-)	34680137	6608	Known 3'UTR
chr4:1499381-1499409 (+)	1499409	6606	Known 3'UTR
chr23:44417087-44417114 (+)	44417116	6602	Known 3'UTR
chr4:12035772-12035802 (-)	12035773	6591	Known 3'UTR
chr4:1682342-1682368 (-)	1682343	6590	Known 3'UTR
chr4:4803657-4803683 (-)	4803657	6585	Known 3'UTR
chr12:35431723-35431750 (+)	35431756	6584	Novel 3'UTR
chr6:40503409-40503435 (-)	40503408	6579	Novel 3'UTR
chr10:45523366-45523395 (-)	45523366	6577	Known 3'UTR
chr2:20978537-20978567 (+)	20978559	6576	Known 3'UTR
chr17:6201883-6201909 (-)	6201889	6575	Known 3'UTR
chr10:21524953-21524979 (+)	21524981	6572	Novel 3'UTR
chr14:15399931-15399961 (-)	15399936	6567	Known 3'UTR
chr13:27556538-27556563 (-)	27556541	6558	Known 3'UTR
chr23:14944540-14944567 (-)	14944538	6558	Known 3'UTR
chr2:37736923-37736950 (+)	37736948	6551	Known 3'UTR
chr5:9464016-9464043 (-)	9464019	6544	Novel 3'UTR
chr2:59624112-59624136 (-)	59624111	6537	Unannotated region
chr3:30392357-30392382 (-)	30392358	6536	Known 3'UTR
chr21:20520407-20520434 (-)	20520409	6536	Known 3'UTR
chr2:16528832-16528862 (+)	16528859	6535	Known 3'UTR
chr3:16299926-16299951 (+)	16299949	6532	Known 3'UTR
chr14:42835796-42835825 (-)	42835796	6525	Known 3'UTR
chr22:58374-58400 (+)	58397	6523	Known 3'UTR
chr14:42895357-42895382 (-)	42895353	6518	Known 3'UTR
chr13:43134032-43134056 (-)	43134031	6518	Novel 3'UTR
chr17:33614798-33614826 (-)	33614797	6515	Known 3'UTR
chr19:7898601-7898627 (-)	7898601	6502	Known 3'UTR
chr20:13088911-13088936 (+)	13088937	6500	Known 3'UTR
chr7:25997665-25997693 (-)	25997668	6497	Known 3'UTR
chr9:9451861-9451889 (-)	9451862	6496	Known 3'UTR
chr7:26178651-26178680 (+)	26178687	6495	Known 3'UTR
chr2:37985410-37985436 (-)	37985409	6490	Known 3'UTR
chr24:39585485-39585508 (-)	39585493	6488	Known 3'UTR
chr15:21249263-21249294 (+)	21249294	6482	Known 3'UTR
chr5:4059564-4059593 (+)	4059593	6479	Known 3'UTR
chr6:45874963-45874994 (-)	45874961	6478	Known 3'UTR
chr7:60030413-60030444 (-)	60030419	6458	Known 3'UTR
chr1:217990-218016 (-)	217983	6454	Known 3'UTR
chr20:35093851-35093876 (+)	35093867	6444	Novel 3'UTR
chr19:839731-839754 (-)	839733	6443	Known 3'UTR
chr7:62652523-62652548 (+)	62652547	6443	Known 3'UTR
chr18:7082387-7082418 (+)	7082424	6441	Known 3'UTR
Zv9_NA234:7488-7516 (+)	7517	6435	Known 3'UTR
chr13:1042571-1042598 (+)	1042593	6430	Known 3'UTR
chr16:45866133-45866162 (-)	45866129	6420	Known 3'UTR
chr16:22604847-22604871 (+)	22604863	6400	Known 3'UTR
chr7:42231104-42231127 (-)	42231104	6393	Known 3'UTR
chr1:8237887-8237916 (+)	8237918	6381	Known 3'UTR
chr8:43299193-43299222 (-)	43299190	6380	Known 3'UTR
chr2:29192217-29192245 (-)	29192217	6374	Known 3'UTR
chr3:22371081-22371107 (-)	22371081	6372	Known 3'UTR
chr16:40975048-40975072 (-)	40975044	6370	Known 3'UTR
chr12:44349478-44349508 (+)	44349503	6366	Known 3'UTR
chr22:5591456-5591485 (-)	5591460	6363	Known 3'UTR
chr3:55419606-55419635 (+)	55419632	6363	Known 3'UTR
chr6:52173741-52173767 (+)	52173768	6362	Known 3'UTR
chr25:20721130-20721155 (-)	20721130	6359	Known 3'UTR
chr3:22267853-22267878 (+)	22267883	6353	Known 3'UTR
chr19:10082356-10082381 (+)	10082381	6348	Novel 3'UTR
chrM:844-874 (+)	875	6337	Mitochondria
chr16:19704299-19704328 (-)	19704290	6336	Novel 3'UTR
chr22:15888235-15888262 (+)	15888257	6334	Unannotated region
chr9:33319917-33319943 (-)	33319915	6331	Known 3'UTR
chr25:14630474-14630499 (-)	14630478	6331	Novel 3'UTR
chr5:33919426-33919453 (-)	33919431	6327	Known 3'UTR
chr1:60060398-60060422 (+)	60060420	6323	Novel 3'UTR
chr5:4261225-4261254 (-)	4261225	6318	Known 3'UTR
chr11:44112952-44112977 (-)	44112952	6317	Novel 3'UTR
chr24:40849681-40849705 (+)	40849703	6315	Unannotated region
chr4:15604363-15604390 (-)	15604357	6310	Known 3'UTR
chr18:20217004-20217030 (-)	20217003	6293	Known 3'UTR
chr9:8435232-8435258 (+)	8435259	6291	Known 3'UTR
chr5:31487226-31487258 (+)	31487259	6290	Known 3'UTR
chr11:35041553-35041581 (+)	35041579	6275	Known 3'UTR
chr9:23372000-23372029 (-)	23372000	6273	Known 3'UTR
chr25:2982078-2982108 (-)	2982082	6272	Known 3'UTR
Zv9_scaffold3489:42592-42620 (-)	42592	6271	Novel 3'UTR
chr16:6974385-6974413 (-)	6974385	6260	Novel 3'UTR
chr2:29960688-29960714 (-)	29960688	6256	Known 3'UTR
chr16:31847586-31847614 (+)	31847602	6254	Known 3'UTR
chr10:34420102-34420132 (+)	34420132	6254	Novel 3'UTR
Zv9_scaffold3489:100726-100753 (+)	100755	6248	Known 3'UTR
chr1:59964011-59964041 (-)	59964011	6240	Repeat
chr20:50398322-50398347 (+)	50398348	6235	Known 3'UTR
chr2:12063607-12063635 (-)	12063607	6234	Novel 3'UTR
chr25:35074163-35074187 (+)	35074187	6224	Known 3'UTR
chr23:18542828-18542855 (-)	18542831	6221	Known 3'UTR
chr19:49720774-49720800 (-)	49720774	6220	Novel 3'UTR
chr10:8503575-8503598 (+)	8503598	6219	Known 3'UTR
chr19:8460740-8460768 (+)	8460762	6216	Known 3'UTR
chr21:43273692-43273717 (-)	43273692	6207	Novel 3'UTR
chr19:18799070-18799100 (+)	18799100	6206	Known 3'UTR
chr14:18624658-18624686 (-)	18624661	6201	Known 3'UTR
chr20:29645734-29645764 (-)	29645731	6198	Known 3'UTR
chr3:14296627-14296655 (-)	14296627	6191	Known 3'UTR
chr22:21635106-21635134 (-)	21635106	6187	Known 3'UTR
chr4:21235976-21236007 (+)	21236012	6183	Known 3'UTR
chr3:26848927-26848952 (+)	26848950	6182	Known 3'UTR
chr13:36970494-36970521 (-)	36970502	6179	Known 3'UTR
chr2:48398576-48398603 (-)	48398576	6173	Known 3'UTR
chr3:393758-393781 (+)	393781	6171	Known 3'UTR
chr19:3700050-3700073 (-)	3700050	6169	Known 3'UTR
chr1:30962711-30962741 (-)	30962709	6165	Known 3'UTR
chr19:4660574-4660602 (-)	4660574	6164	Novel 3'UTR
chr22:11550858-11550886 (-)	11550855	6159	Known 3'UTR
chr16:28262361-28262389 (+)	28262381	6158	Known 3'UTR
chr19:34236216-34236245 (+)	34236242	6152	Known 3'UTR
chr19:38857-38886 (+)	38888	6151	Known 3'UTR
chr14:53147607-53147636 (+)	53147633	6135	Known 3'UTR
chr2:58644258-58644284 (-)	58644258	6129	Known 3'UTR
chr1:34339554-34339577 (+)	34339582	6125	Known 3'UTR
chr11:13113706-13113734 (+)	13113725	6121	Known 3'UTR
chr19:28063063-28063088 (-)	28063056	6117	Known 3'UTR
chr14:27413736-27413763 (-)	27413741	6115	Known 3'UTR
chr3:15664660-15664684 (-)	15664659	6114	Known 3'UTR
chr13:997095-997121 (-)	997090	6110	Known 3'UTR
chr15:46577007-46577033 (+)	46577031	6108	Unannotated region
chr4:20251068-20251094 (+)	20251096	6106	Known 3'UTR
chr17:17593321-17593349 (-)	17593320	6105	Unannotated region
chr18:17719684-17719712 (+)	17719709	6097	Known 3'UTR
chr2:25991744-25991774 (+)	25991771	6096	Known 3'UTR
chr10:1713674-1713703 (-)	1713682	6096	Known 3'UTR
chr13:36441275-36441301 (-)	36441275	6096	Known 3'UTR
chr15:27773863-27773895 (+)	27773895	6094	Known 3'UTR
chr7:25653328-25653355 (-)	25653330	6088	Known 3'UTR
chr5:34913570-34913598 (-)	34913575	6084	Known 3'UTR
chr5:31441755-31441780 (+)	31441782	6082	Known 3'UTR
chr24:31176302-31176328 (-)	31176300	6077	Known 3'UTR
chr10:10966795-10966822 (-)	10966795	6071	Known 3'UTR
chr23:29605402-29605429 (+)	29605423	6067	Known 3'UTR
chr20:51700900-51700931 (-)	51700895	6067	Known 3'UTR
chr4:18983542-18983569 (-)	18983545	6063	Novel 3'UTR
chr24:22535145-22535177 (-)	22535141	6053	Known 3'UTR
chr14:53502903-53502930 (+)	53502928	6053	Known 3'UTR
chr3:3999015-3999045 (+)	3999046	6051	Known 3'UTR
chr19:16829007-16829034 (-)	16829012	6051	Known 3'UTR
chr1:2056305-2056334 (+)	2056337	6049	Known 3'UTR
chr7:15389363-15389387 (-)	15389370	6047	Known 3'UTR
chr23:45964749-45964777 (-)	45964749	6044	Known 3'UTR
chr19:8053367-8053394 (+)	8053390	6036	Known 3'UTR
chr21:602321-602352 (+)	602359	6032	Known 3'UTR
chr12:19597424-19597449 (-)	19597426	6028	Known 3'UTR
chr3:40163241-40163267 (+)	40163258	6019	Known 3'UTR
chr10:46287506-46287537 (-)	46287506	6018	Known 3'UTR
chr11:984244-984270 (-)	984250	6016	Known 3'UTR
chr16:8016914-8016942 (-)	8016913	6013	Novel 3'UTR
chr13:45634703-45634730 (-)	45634706	6013	Novel 3'UTR
chr12:14367761-14367790 (+)	14367790	6011	Known 3'UTR
chr9:47869596-47869628 (-)	47869600	6010	Known 3'UTR
chr14:34488030-34488061 (+)	34488057	6007	Known 3'UTR
chr2:8561812-8561838 (+)	8561835	6007	Known 3'UTR
chr19:362800-362823 (+)	362827	6004	Novel 3'UTR
chr3:21040814-21040839 (-)	21040813	5995	Novel 3'UTR
chr24:24333284-24333312 (+)	24333317	5993	Known 3'UTR
chr5:25254148-25254173 (-)	25254154	5992	Known 3'UTR
chr11:6942537-6942563 (-)	6942541	5990	Known 3'UTR
chr20:29503054-29503080 (-)	29503052	5988	Known 3'UTR
chr7:52375618-52375642 (-)	52375618	5978	Known 3'UTR
chr6:26981231-26981259 (+)	26981259	5974	Known 3'UTR
chr14:23105460-23105486 (-)	23105468	5962	Known 3'UTR
chr25:37286305-37286337 (-)	37286309	5957	Known 3'UTR
chr10:17087656-17087687 (-)	17087655	5956	Known 3'UTR
chr19:5715857-5715886 (+)	5715889	5956	Known 3'UTR
chr13:11286036-11286063 (+)	11286063	5954	Known 3'UTR
chr9:26205447-26205470 (-)	26205447	5952	Known 3'UTR
chr22:32690458-32690488 (+)	32690493	5942	Known 3'UTR
chr21:18735643-18735669 (-)	18735636	5940	Known 3'UTR
chr20:2638626-2638656 (-)	2638626	5938	Novel 3'UTR
chr14:51150671-51150696 (-)	51150671	5932	Novel 3'UTR
chr19:10082975-10082999 (-)	10082974	5923	Known 3'UTR
chr2:45004901-45004929 (-)	45004897	5918	Known 3'UTR
chr3:20876419-20876449 (-)	20876413	5916	Novel 3'UTR
chr4:7050535-7050559 (-)	7050534	5914	Known 3'UTR
chr2:2659525-2659553 (+)	2659549	5911	Novel 3'UTR
chr14:15412935-15412961 (-)	15412935	5909	Known 3'UTR
chr13:31648184-31648215 (-)	31648193	5909	Known 3'UTR
chr12:11503767-11503798 (-)	11503764	5904	Known 3'UTR
chr4:15925907-15925936 (-)	15925906	5900	Known 3'UTR
chr2:36810193-36810223 (-)	36810197	5900	Known 3'UTR
chr5:9421400-9421429 (+)	9421425	5900	Novel 3'UTR
chr16:31646052-31646082 (-)	31646052	5894	Known 3'UTR
chr8:55492594-55492624 (+)	55492617	5894	Known 3'UTR
chr9:31278943-31278970 (-)	31278946	5894	Known 3'UTR
chr8:8043460-8043488 (-)	8043459	5893	Known 3'UTR
chr14:31845044-31845067 (-)	31845044	5888	Known 3'UTR
chr19:20278276-20278303 (-)	20278281	5885	Known 3'UTR
chr20:32177910-32177935 (+)	32177940	5877	Known 3'UTR
chr22:40701671-40701696 (+)	40701696	5873	Known 3'UTR
chr7:43887740-43887768 (+)	43887768	5873	Known 3'UTR
chr16:34978822-34978849 (-)	34978828	5872	Known 3'UTR
chr24:14463464-14463491 (-)	14463467	5869	Known 3'UTR
chr22:11233641-11233669 (-)	11233637	5867	Known 3'UTR
chr9:34254951-34254983 (+)	34254976	5865	Known 3'UTR
chr23:33973421-33973446 (-)	33973418	5864	Novel 3'UTR
chr25:23058596-23058625 (+)	23058621	5860	Known 3'UTR
chr15:28440877-28440903 (+)	28440899	5860	Novel 3'UTR
chr25:3397834-3397863 (-)	3397834	5859	Known 3'UTR
chr21:21051457-21051486 (-)	21051463	5857	Novel 3'UTR
chr20:40504102-40504129 (+)	40504129	5855	Novel 3'UTR
chr13:5882590-5882619 (+)	5882622	5852	Novel 3'UTR
Zv9_NA910:1879-1903 (-)	1879	5850	Novel 3'UTR
chr9:886629-886656 (-)	886631	5845	Known 3'UTR
chr12:18033677-18033700 (+)	18033697	5839	Novel 3'UTR
chr6:53002837-53002862 (-)	53002832	5838	Known 3'UTR
chr7:58369959-58369988 (+)	58369984	5835	Known 3'UTR
chr13:36995451-36995482 (+)	36995483	5835	Known 3'UTR
chr3:17914556-17914587 (-)	17914556	5831	Known 3'UTR
chr7:1602146-1602174 (+)	1602175	5828	Known 3'UTR
chr23:496650-496675 (-)	496641	5826	Known 3'UTR
chr20:39715464-39715495 (+)	39715497	5820	Known 3'UTR
chr5:64616592-64616619 (+)	64616628	5816	Known 3'UTR
chr14:43711121-43711146 (-)	43711125	5813	Known 3'UTR
chr22:15498123-15498153 (+)	15498160	5809	Known 3'UTR
chr7:13785978-13786002 (-)	13785978	5808	Known 3'UTR
chr1:7615995-7616023 (-)	7615984	5807	Novel 3'UTR
chr14:43491942-43491970 (-)	43491946	5804	Known 3'UTR
chr17:11240315-11240339 (+)	11240342	5803	Known 3'UTR
chrM:799-825 (-)	792	5802	Mitochondria
chr3:40282326-40282354 (+)	40282354	5800	Novel 3'UTR
chr15:6532406-6532430 (-)	6532403	5793	Known 3'UTR
chr3:31077411-31077441 (+)	31077439	5792	Known 3'UTR
chr19:49409964-49409995 (+)	49409989	5788	Known 3'UTR
chr23:10933181-10933205 (+)	10933205	5785	Novel 3'UTR
chr17:18515655-18515680 (-)	18515655	5785	Unannotated region
chr7:75197282-75197308 (+)	75197301	5782	Known 3'UTR
chr21:13911661-13911692 (+)	13911693	5782	Known 3'UTR
chr24:20254909-20254934 (-)	20254909	5782	Novel 3'UTR
chr9:34251548-34251575 (+)	34251573	5778	Known 3'UTR
chr17:24663813-24663841 (+)	24663839	5772	Known 3'UTR
chr14:45820483-45820510 (-)	45820479	5771	Known 3'UTR
chr7:51365477-51365506 (+)	51365506	5763	Known 3'UTR
chr24:12743200-12743224 (+)	12743229	5758	Known 3'UTR
chr7:26213688-26213717 (+)	26213710	5757	Novel 3'UTR
chr16:24081467-24081491 (-)	24081467	5756	Known 3'UTR
chr4:1906111-1906138 (-)	1906117	5755	Known 3'UTR
chr8:25596785-25596812 (+)	25596808	5750	Novel 3'UTR
chr8:29301381-29301407 (-)	29301376	5745	Known 3'UTR
chr3:55955117-55955147 (-)	55955117	5744	Known 3'UTR
chr20:37401244-37401274 (+)	37401264	5742	Known 3'UTR
chr1:56317037-56317065 (+)	56317068	5741	Novel 3'UTR
chr6:1393805-1393833 (+)	1393833	5737	Known 3'UTR
chr21:32375614-32375642 (+)	32375648	5735	Unannotated region
chr19:49774634-49774660 (-)	49774634	5734	Known 3'UTR
chr5:13053491-13053514 (-)	13053491	5734	Unannotated region
chr7:44443548-44443574 (-)	44443548	5733	Known 3'UTR
chr18:37943111-37943139 (+)	37943145	5732	Known 3'UTR
chr14:22849419-22849445 (+)	22849445	5731	Known 3'UTR
chr13:2094951-2094975 (-)	2094951	5730	Known 3'UTR
chr21:18591417-18591447 (-)	18591422	5719	Known 3'UTR
chr19:3795203-3795233 (+)	3795237	5717	Known 3'UTR
chr7:31606920-31606947 (-)	31606920	5717	Known 3'UTR
chr16:5167053-5167084 (-)	5167056	5716	Unannotated region
chr23:16103085-16103109 (-)	16103080	5714	Known 3'UTR
chr14:22125131-22125160 (-)	22125134	5708	Known 3'UTR
chr19:33414009-33414037 (+)	33414040	5708	Known 3'UTR
chr23:9901567-9901595 (-)	9901567	5700	Known 3'UTR
chr2:30623107-30623135 (+)	30623132	5699	Known 3'UTR
chr14:47718534-47718562 (+)	47718564	5697	Known 3'UTR
chr9:39404493-39404522 (+)	39404525	5694	Known 3'UTR
chr9:900409-900437 (+)	900437	5690	Novel 3'UTR
chr6:33645493-33645519 (+)	33645517	5673	Known 3'UTR
chr7:32257790-32257817 (-)	32257794	5667	Known 3'UTR
chr18:39206926-39206953 (-)	39206919	5656	Known 3'UTR
chr18:20216992-20217018 (-)	20216985	5655	Known 3'UTR
chr5:25877542-25877568 (-)	25877546	5651	Novel 3'UTR
chr21:16081794-16081821 (+)	16081825	5649	Known 3'UTR
chr3:55441462-55441489 (+)	55441494	5644	Known 3'UTR
chr19:33522301-33522327 (+)	33522331	5637	Known 3'UTR
chr3:32950022-32950048 (-)	32950024	5631	Known 3'UTR
chr11:26342160-26342190 (+)	26342187	5631	Known 3'UTR
chr9:2878276-2878304 (-)	2878272	5620	Known 3'UTR
chr16:51977230-51977255 (+)	51977259	5616	Known 3'UTR
chr19:37271259-37271289 (-)	37271258	5613	Known 3'UTR
chr13:19074394-19074424 (-)	19074391	5613	Unannotated region
chr6:41391834-41391859 (+)	41391868	5612	Novel 3'UTR
chr9:33338277-33338307 (+)	33338313	5609	Known 3'UTR
chr5:1284692-1284717 (+)	1284720	5603	Unannotated region
chr17:24514695-24514723 (+)	24514723	5597	Known 3'UTR
chr21:42122184-42122211 (+)	42122211	5596	Known 3'UTR
chr18:40157297-40157328 (-)	40157302	5595	Known 3'UTR
chr7:40569128-40569155 (+)	40569151	5588	Known 3'UTR
chr18:7872892-7872917 (+)	7872914	5585	Novel 3'UTR
chr25:24278954-24278981 (-)	24278958	5573	Known 3'UTR
chr20:26054498-26054525 (+)	26054528	5572	Known 3'UTR
chr3:62007794-62007818 (+)	62007818	5570	Known 3'UTR
chr17:25477639-25477666 (-)	25477639	5568	Known 3'UTR
chr9:2552196-2552224 (-)	2552204	5565	Novel 3'UTR
chr3:26990355-26990382 (-)	26990354	5560	Known 3'UTR
chr16:44564175-44564206 (-)	44564175	5551	Known 3'UTR
chr20:26975831-26975854 (+)	26975845	5550	Novel 3'UTR
chr14:22053771-22053800 (-)	22053770	5545	Unannotated region
chr2:3463795-3463820 (-)	3463795	5540	Known 3'UTR
chr1:116369-116400 (+)	116398	5540	Known 3'UTR
chr19:45555857-45555886 (-)	45555855	5538	Known 3'UTR
chr6:49466044-49466074 (-)	49466042	5536	Known 3'UTR
chr10:38748425-38748454 (+)	38748445	5535	Known 3'UTR
chr14:8777069-8777098 (-)	8777069	5534	Known 3'UTR
chr17:53903422-53903450 (+)	53903446	5534	Novel 3'UTR
chr7:56900634-56900659 (-)	56900638	5530	Known 3'UTR
chr1:59820882-59820910 (+)	59820910	5527	Novel 3'UTR
chr20:31257008-31257033 (+)	31257030	5521	Known 3'UTR
chr24:26828839-26828868 (+)	26828871	5520	Novel 3'UTR
chr6:55261886-55261915 (-)	55261893	5518	Known 3'UTR
chr24:26446936-26446961 (+)	26446970	5511	Novel 3'UTR
chr8:4646184-4646213 (-)	4646179	5506	Known 3'UTR
chr17:28857835-28857858 (-)	28857835	5504	Known 3'UTR
chr17:15949593-15949618 (+)	15949621	5503	Known 3'UTR
chr16:56147791-56147819 (-)	56147791	5501	Known 3'UTR
chr23:13009542-13009568 (+)	13009565	5501	Known 3'UTR
chr13:12863004-12863029 (-)	12863008	5498	Known 3'UTR
chr14:10806076-10806103 (-)	10806076	5495	Known 3'UTR
chr21:18744327-18744357 (-)	18744336	5490	Known 3'UTR
chr14:31671153-31671181 (+)	31671177	5484	Known 3'UTR
chr19:15282732-15282759 (-)	15282736	5484	Novel 3'UTR
chr4:444168-444196 (+)	444192	5481	Novel 3'UTR
chr13:11730378-11730406 (-)	11730375	5480	Novel 3'UTR
chr21:13952760-13952784 (+)	13952784	5478	Known 3'UTR
chr17:995881-995909 (+)	995909	5476	Known 3'UTR
chr1:52946674-52946700 (-)	52946674	5475	Known 3'UTR
chr14:29479540-29479565 (+)	29479565	5472	Known 3'UTR
chr6:28504092-28504119 (+)	28504112	5471	Known 3'UTR
chr19:32824795-32824822 (-)	32824790	5471	Known 3'UTR
chr25:20068120-20068146 (-)	20068120	5468	Known 3'UTR
chr5:69134371-69134397 (+)	69134395	5463	Known 3'UTR
chr7:39656452-39656481 (+)	39656481	5454	Known 3'UTR
chr1:53887043-53887068 (-)	53887037	5439	Known 3'UTR
chr15:37028174-37028199 (+)	37028199	5439	Known 3'UTR
chr14:31420948-31420977 (-)	31420950	5439	Novel 3'UTR
chr20:22258457-22258486 (-)	22258457	5432	Known 3'UTR
chr21:29044082-29044111 (+)	29044108	5432	Known 3'UTR
chr5:59849249-59849273 (+)	59849271	5431	Known 3'UTR
chr15:1585021-1585050 (-)	1585021	5427	Known 3'UTR
chr13:25790169-25790200 (+)	25790197	5418	Known 3'UTR
chr22:34461567-34461592 (-)	34461569	5417	Known 3'UTR
chr1:7631413-7631442 (-)	7631413	5417	Known 3'UTR
chr14:31960021-31960049 (-)	31960028	5416	Novel 3'UTR
chr5:14858596-14858624 (+)	14858622	5415	Known 3'UTR
chr3:11836043-11836070 (-)	11836047	5409	Known 3'UTR
chr11:19931865-19931892 (+)	19931884	5408	Known 3'UTR
chr9:24938905-24938928 (+)	24938924	5407	Novel 3'UTR
chr5:3926094-3926117 (+)	3926117	5403	Known 3'UTR
chr12:25354980-25355011 (+)	25355016	5403	Known 3'UTR
chr21:131074-131101 (-)	131074	5402	Known 3'UTR
chr18:47502831-47502859 (+)	47502853	5400	Novel 3'UTR
chr4:61900672-61900699 (-)	61900672	5397	Unannotated region
chr17:53950898-53950929 (-)	53950900	5395	Known 3'UTR
chr7:74858923-74858949 (+)	74858942	5394	Known 3'UTR
chr22:2139840-2139865 (-)	2139840	5391	Known 3'UTR
chr14:25279487-25279516 (+)	25279514	5391	Novel 3'UTR
chr11:6540383-6540412 (+)	6540412	5383	Known 3'UTR
chr2:22837423-22837448 (-)	22837432	5382	Known 3'UTR
Zv9_scaffold3537:25684-25705 (+)	25706	5381	Known 3'UTR
chr15:25834683-25834710 (-)	25834680	5379	Known 3'UTR
chr13:18677879-18677907 (-)	18677877	5373	Known 3'UTR
chr18:30425305-30425333 (-)	30425310	5367	Known 3'UTR
chr2:7482657-7482685 (-)	7482662	5365	Known 3'UTR
chr10:21440337-21440362 (-)	21440331	5363	Novel 3'UTR
chr13:33475330-33475358 (-)	33475323	5360	Known 3'UTR
chr14:42752590-42752616 (-)	42752590	5357	Novel 3'UTR
chr19:33035922-33035947 (+)	33035947	5355	Known 3'UTR
chr10:29700-29727 (+)	29732	5344	Novel 3'UTR
chr7:51864685-51864716 (+)	51864716	5343	Known 3'UTR
chr15:9568764-9568790 (+)	9568791	5335	Novel 3'UTR
chr7:20649192-20649219 (+)	20649221	5333	Known 3'UTR
chr24:34522231-34522261 (-)	34522224	5331	Novel 3'UTR
chr8:908230-908254 (+)	908254	5330	Known 3'UTR
chr25:32131973-32131997 (+)	32131997	5329	Known 3'UTR
chr8:24509642-24509669 (+)	24509669	5324	Known 3'UTR
chr18:39008275-39008301 (-)	39008282	5319	Known 3'UTR
chr14:34272768-34272794 (-)	34272768	5315	Known 3'UTR
chr13:33483373-33483400 (+)	33483400	5315	Known 3'UTR
chr13:28839459-28839488 (+)	28839488	5309	Known 3'UTR
chr7:12880710-12880738 (-)	12880713	5306	Known 3'UTR
chr17:30663937-30663965 (-)	30663937	5302	Novel 3'UTR
chr1:47652530-47652561 (-)	47652526	5295	Known 3'UTR
chr2:55277404-55277430 (+)	55277424	5295	Known 3'UTR
chr7:28144327-28144357 (+)	28144357	5294	Known 3'UTR
chr14:26141374-26141399 (-)	26141377	5291	Known 3'UTR
chr6:59786010-59786039 (+)	59786034	5289	Known 3'UTR
chr5:34902042-34902062 (-)	34902040	5282	Known 3'UTR
chr19:45386765-45386792 (+)	45386798	5282	Novel 3'UTR
chr17:24442843-24442872 (+)	24442877	5276	Known 3'UTR
chr10:1983895-1983923 (-)	1983897	5269	Known 3'UTR
chr18:12693319-12693347 (+)	12693347	5269	Known 3'UTR
chr2:29617510-29617533 (-)	29617510	5266	Known 3'UTR
chr5:29915465-29915492 (+)	29915493	5266	Known 3'UTR
chr24:37016939-37016963 (-)	37016939	5260	Known 3'UTR
chr22:4786350-4786379 (+)	4786376	5256	Novel 3'UTR
chr16:35909617-35909644 (+)	35909644	5253	Known 3'UTR
chr22:15575239-15575264 (-)	15575241	5249	Novel 3'UTR
chr13:17520192-17520220 (+)	17520220	5249	Novel 3'UTR
chr12:26621013-26621039 (-)	26621015	5248	Novel 3'UTR
chr5:11850524-11850552 (+)	11850552	5248	Unannotated region
chr23:27738593-27738624 (-)	27738593	5246	Known 3'UTR
chr23:2757795-2757823 (+)	2757827	5244	Known 3'UTR
chr14:35619371-35619401 (+)	35619401	5239	Known 3'UTR
chr22:4849516-4849544 (+)	4849544	5234	Novel 3'UTR
chr5:42769719-42769746 (+)	42769746	5232	Novel 3'UTR
chr8:47170896-47170922 (-)	47170897	5231	Known 3'UTR
chr8:52657696-52657724 (+)	52657733	5227	Unannotated region
chr12:35485085-35485114 (+)	35485118	5225	Known 3'UTR
chr19:27843310-27843339 (+)	27843344	5223	Known 3'UTR
chr21:33845087-33845112 (-)	33845086	5222	Known 3'UTR
chr14:33716095-33716120 (-)	33716102	5217	Known 3'UTR
chr7:44631282-44631309 (+)	44631305	5214	Novel 3'UTR
chr18:20346668-20346692 (+)	20346692	5212	Known 3'UTR
chr16:40822433-40822464 (+)	40822465	5212	Known 3'UTR
chr10:27627292-27627320 (+)	27627324	5206	Novel 3'UTR
chr3:60353622-60353648 (+)	60353648	5201	Known 3'UTR
chr19:10135520-10135548 (-)	10135519	5199	Known 3'UTR
chr23:37193539-37193565 (-)	37193542	5191	Novel 3'UTR
chr18:17769165-17769193 (+)	17769194	5190	Known 3'UTR
chr8:49881065-49881095 (+)	49881095	5187	Known 3'UTR
chr13:54068479-54068506 (-)	54068478	5179	Novel 3'UTR
Zv9_NA660:14533-14561 (-)	14527	5175	Novel 3'UTR
chr3:31761166-31761194 (+)	31761187	5174	Known 3'UTR
chr22:25614075-25614098 (+)	25614098	5173	Known 3'UTR
chr16:12525093-12525121 (+)	12525118	5173	Unannotated region
chr20:36841771-36841803 (+)	36841797	5172	Novel 3'UTR
chr1:18303664-18303686 (+)	18303686	5166	Known 3'UTR
chr3:14834191-14834217 (-)	14834185	5164	Known 3'UTR
chr22:448430-448455 (-)	448434	5162	Known 3'UTR
chr10:8348975-8349000 (+)	8349000	5156	Known 3'UTR
chr4:5113371-5113401 (-)	5113375	5152	Known 3'UTR
chr10:40027265-40027290 (-)	40027262	5149	Known 3'UTR
chr5:66599687-66599712 (+)	66599712	5149	Known 3'UTR
chr14:20140562-20140592 (+)	20140592	5144	Known 3'UTR
chr10:27467511-27467537 (+)	27467534	5140	Known 3'UTR
chr6:27915944-27915972 (+)	27915974	5139	Novel 3'UTR
chr7:15231291-15231319 (-)	15231291	5138	Novel 3'UTR
chr17:43655689-43655717 (-)	43655681	5137	Known 3'UTR
chr2:47707900-47707931 (+)	47707924	5131	Known 3'UTR
chr10:8020001-8020024 (+)	8020024	5129	Known 3'UTR
chr6:55319647-55319675 (+)	55319679	5125	Known 3'UTR
chr12:33407875-33407901 (-)	33407871	5120	Known 3'UTR
chr3:32915185-32915212 (+)	32915221	5119	Known 3'UTR
chrM:7939-7967 (+)	7973	5118	Mitochondria
chr23:34273495-34273520 (+)	34273521	5117	Known 3'UTR
chr19:1017827-1017855 (-)	1017827	5117	Novel 3'UTR
chr13:33453049-33453078 (-)	33453049	5111	Known 3'UTR
chr16:14573160-14573187 (+)	14573187	5107	Known 3'UTR
chr23:24514181-24514210 (-)	24514181	5106	Known 3'UTR
chr5:1749041-1749071 (-)	1749048	5105	Novel 3'UTR
chr15:19367787-19367814 (-)	19367782	5102	Known 3'UTR
chr2:37900586-37900615 (-)	37900589	5102	Known 3'UTR
chr23:583371-583402 (+)	583398	5099	Known 3'UTR
chr16:42051997-42052023 (-)	42052001	5095	Known 3'UTR
chr18:20900902-20900930 (+)	20900928	5094	Known 3'UTR
chr16:31455162-31455191 (+)	31455188	5091	Novel 3'UTR
chr23:35693609-35693638 (-)	35693605	5089	Known 3'UTR
chr7:75016104-75016130 (+)	75016132	5087	Novel 3'UTR
chr22:21274808-21274833 (-)	21274806	5086	Known 3'UTR
chr6:58770275-58770298 (+)	58770298	5083	Known 3'UTR
chr16:49830680-49830709 (+)	49830707	5083	Known 3'UTR
chr19:13303825-13303855 (+)	13303855	5082	Known 3'UTR
chr1:54219994-54220015 (-)	54219989	5082	Novel 3'UTR
chr14:27461834-27461862 (-)	27461838	5081	Known 3'UTR
chr2:36926884-36926909 (+)	36926909	5080	Known 3'UTR
chr7:23476098-23476126 (+)	23476121	5076	Novel 3'UTR
chr13:24635819-24635849 (+)	24635855	5068	Known 3'UTR
chr19:43949876-43949905 (+)	43949905	5067	Unannotated region
chr13:8048735-8048765 (-)	8048734	5065	Novel 3'UTR
chr18:15472204-15472231 (+)	15472238	5064	Known 3'UTR
chr21:5273640-5273671 (-)	5273634	5059	Intronic
chr23:27816177-27816200 (-)	27816177	5057	Known 3'UTR
chr17:12161397-12161424 (-)	12161397	5054	Known 3'UTR
chr16:34481890-34481920 (-)	34481897	5052	Known 3'UTR
chr21:43886699-43886727 (-)	43886702	5052	Known 3'UTR
chr5:33506431-33506460 (+)	33506460	5048	Known 3'UTR
chr21:39578675-39578706 (-)	39578674	5047	Known 3'UTR
chr20:34365762-34365788 (+)	34365788	5046	Known 3'UTR
chr19:9851018-9851043 (+)	9851040	5045	Known 3'UTR
chr19:36553508-36553539 (-)	36553508	5039	Known 3'UTR
chr22:228950-228979 (+)	228983	5035	Known 3'UTR
chr11:26683591-26683618 (+)	26683618	5035	Known 3'UTR
chr4:8906033-8906063 (+)	8906071	5033	Known 3'UTR
chr14:53732008-53732033 (+)	53732031	5033	Novel 3'UTR
chr16:45093084-45093113 (-)	45093084	5033	Novel 3'UTR
chr20:30747743-30747773 (+)	30747769	5031	Known 3'UTR
chr5:32253547-32253574 (-)	32253551	5027	Known 3'UTR
chr6:3502087-3502116 (+)	3502113	5025	Known 3'UTR
chr19:29757140-29757167 (-)	29757140	5023	Known 3'UTR
chr3:6963951-6963976 (+)	6963969	5017	Known 3'UTR
chr25:18813588-18813617 (-)	18813588	5013	Known 3'UTR
chr19:44477950-44477973 (+)	44477978	5011	Known 3'UTR
chr3:24726117-24726147 (+)	24726147	5011	Known 3'UTR
chr13:30375818-30375847 (-)	30375820	5008	Known 3'UTR
chr5:28431520-28431545 (-)	28431523	5007	Known 3'UTR
chr21:28913677-28913703 (-)	28913685	5000	Known 3'UTR
chr21:249397-249423 (+)	249425	5000	Known 3'UTR
chr1:55499595-55499624 (-)	55499604	4997	Known 3'UTR
chr22:19865730-19865756 (-)	19865729	4994	Known 3'UTR
chr6:34999131-34999158 (+)	34999159	4994	Known 3'UTR
chr16:42740645-42740669 (+)	42740659	4987	Known 3'UTR
chr5:64567475-64567498 (+)	64567492	4987	Known 3'UTR
chr19:50167800-50167830 (-)	50167803	4987	Novel 3'UTR
chr7:1649104-1649132 (+)	1649124	4983	Novel 3'UTR
chr7:11445339-11445367 (-)	11445332	4977	Known 3'UTR
chr7:41483893-41483918 (+)	41483919	4977	Novel 3'UTR
chr6:10790887-10790915 (+)	10790909	4973	Known 3'UTR
chr5:72301339-72301365 (-)	72301337	4973	Unannotated region
chr23:35589198-35589228 (+)	35589228	4970	Known 3'UTR
chr17:20759580-20759608 (+)	20759613	4969	Known 3'UTR
chr21:18144097-18144125 (-)	18144101	4969	Novel 3'UTR
chr16:31811319-31811349 (-)	31811315	4968	Known 3'UTR
chr1:4243641-4243669 (-)	4243643	4964	Known 3'UTR
chr6:40701254-40701280 (-)	40701261	4964	Novel 3'UTR
chr25:31253120-31253148 (+)	31253148	4963	Known 3'UTR
chr17:8442430-8442459 (-)	8442430	4955	Known 3'UTR
chr1:8237819-8237847 (+)	8237842	4955	Known 3'UTR
chr11:5870822-5870849 (+)	5870842	4954	Known 3'UTR
chr8:993584-993614 (+)	993614	4952	Known 3'UTR
chr11:45483493-45483522 (-)	45483493	4948	Known 3'UTR
chrM:151-179 (+)	174	4947	Mitochondria
chr17:43564385-43564411 (-)	43564385	4945	Known 3'UTR
chr10:45263628-45263658 (-)	45263622	4943	Known 3'UTR
chr10:46549482-46549505 (-)	46549482	4942	Novel 3'UTR
chr19:44846526-44846555 (-)	44846526	4940	Known 3'UTR
chr22:10881265-10881296 (-)	10881265	4938	Known 3'UTR
chr11:5574392-5574420 (+)	5574420	4937	Known 3'UTR
chr9:33320332-33320359 (-)	33320331	4937	Known 3'UTR
chr16:31848235-31848264 (+)	31848255	4935	Known 3'UTR
chr23:6786567-6786597 (-)	6786561	4931	Novel 3'UTR
chr16:26230356-26230385 (+)	26230391	4928	Known 3'UTR
chr10:38117907-38117936 (-)	38117914	4928	Novel 3'UTR
chr6:7652621-7652645 (-)	7652621	4926	Known 3'UTR
Zv9_NA163:16865-16890 (-)	16870	4925	Novel 3'UTR
chr9:700854-700880 (+)	700880	4924	Known 3'UTR
chr5:3931678-3931707 (-)	3931671	4918	Known 3'UTR
chr13:43331993-43332024 (+)	43332021	4918	Known 3'UTR
chr10:8299505-8299535 (+)	8299535	4917	Known 3'UTR
chr14:6592232-6592259 (+)	6592256	4917	Unannotated region
chr6:9186814-9186842 (-)	9186812	4908	Known 3'UTR
chr7:40070163-40070193 (+)	40070191	4906	Known 3'UTR
chr22:35040670-35040695 (+)	35040696	4905	Known 3'UTR
chr6:40771736-40771760 (+)	40771766	4905	Novel 3'UTR
chr22:32342001-32342028 (+)	32342028	4902	Known 3'UTR
chr7:37810572-37810600 (+)	37810593	4901	Known 3'UTR
chr19:43756726-43756755 (+)	43756752	4897	Known 3'UTR
chr2:161048-161076 (-)	161048	4896	Known 3'UTR
chr21:36769619-36769648 (+)	36769648	4894	Unannotated region
chr3:25371128-25371157 (-)	25371131	4892	Known 3'UTR
chr5:25877343-25877369 (-)	25877348	4884	Known 3'UTR
chr10:38465248-38465275 (+)	38465277	4883	Known 3'UTR
chr9:42193206-42193232 (-)	42193201	4883	Known 3'UTR
chr2:25993168-25993194 (+)	25993194	4881	Known 3'UTR
chr13:31566933-31566957 (-)	31566928	4879	Known 3'UTR
Zv9_scaffold3537:230-261 (+)	261	4878	Unannotated region
chr2:16534446-16534471 (-)	16534441	4875	Known 3'UTR
chr9:25157096-25157127 (+)	25157118	4868	Novel 3'UTR
chr5:25457535-25457563 (-)	25457531	4866	Known 3'UTR
chr22:1227295-1227321 (+)	1227319	4865	Known 3'UTR
chr20:14012842-14012870 (-)	14012842	4859	Known 3'UTR
chr13:24608064-24608093 (-)	24608059	4857	Known 3'UTR
chr7:75729819-75729850 (+)	75729849	4856	Known 3'UTR
chr11:5890498-5890526 (-)	5890497	4852	Known 3'UTR
chr6:10652802-10652827 (-)	10652801	4849	Novel 3'UTR
chr1:44371235-44371264 (-)	44371233	4847	Known 3'UTR
chr5:34116964-34116993 (-)	34116967	4844	Known 3'UTR
chr7:33959194-33959221 (-)	33959194	4839	Known 3'UTR
chr8:11592050-11592074 (+)	11592071	4838	Known 3'UTR
chr3:18227754-18227782 (+)	18227788	4836	Known 3'UTR
chr22:342454-342486 (+)	342482	4835	Novel 3'UTR
chr14:42195496-42195515 (+)	42195515	4833	Known 3'UTR
chr1:56320025-56320050 (-)	56320020	4828	Known 3'UTR
chr23:29954459-29954483 (-)	29954460	4824	Known 3'UTR
chr23:20717558-20717586 (-)	20717558	4820	Novel 3'UTR
chr19:1483875-1483905 (-)	1483875	4817	Known 3'UTR
chr9:13161972-13162002 (-)	13161979	4808	Known 3'UTR
chr4:11097870-11097895 (+)	11097895	4807	Novel 3'UTR
chr12:28058363-28058392 (+)	28058393	4805	Known 3'UTR
chr1:59728353-59728382 (-)	59728356	4802	Novel 3'UTR
chr19:32050917-32050946 (-)	32050910	4799	Known 3'UTR
chr1:24985795-24985819 (+)	24985819	4798	Known 3'UTR
chr3:47711085-47711112 (+)	47711110	4795	Known 3'UTR
chr21:868845-868870 (+)	868870	4790	Novel 3'UTR
chr15:8935266-8935295 (+)	8935297	4784	Novel 3'UTR
chr18:44072038-44072065 (+)	44072068	4780	Known 3'UTR
chr7:9179704-9179734 (-)	9179703	4779	Known 3'UTR
chr16:6344530-6344556 (-)	6344539	4775	Known 3'UTR
chr17:21202308-21202339 (-)	21202306	4774	Known 3'UTR
chr3:26859956-26859986 (+)	26859986	4774	Known 3'UTR
chr3:39232874-39232901 (-)	39232883	4773	Novel 3'UTR
chr2:59624038-59624066 (+)	59624066	4769	Novel 3'UTR
chr6:50406230-50406254 (+)	50406254	4768	Novel 3'UTR
chr20:36420277-36420307 (-)	36420271	4763	Known 3'UTR
chr11:2441466-2441491 (+)	2441488	4762	Known 3'UTR
chr6:33624483-33624509 (-)	33624477	4761	Known 3'UTR
chr3:55966517-55966548 (+)	55966544	4753	Known 3'UTR
chr25:36401902-36401928 (-)	36401900	4751	Known 3'UTR
chr23:44669676-44669701 (-)	44669675	4750	Unannotated region
chr3:55975082-55975109 (+)	55975109	4749	Known 3'UTR
chr14:52000013-52000043 (-)	52000013	4748	Novel 3'UTR
chr4:15380015-15380046 (-)	15380017	4748	Unannotated region
chr21:11888009-11888040 (-)	11888022	4747	Known 3'UTR
chr5:60787865-60787888 (-)	60787865	4736	Known 3'UTR
chr2:45710635-45710657 (-)	45710635	4736	Known 3'UTR
chr24:41227055-41227084 (+)	41227089	4735	Known 3'UTR
chr14:51191763-51191791 (-)	51191763	4735	Novel 3'UTR
chr7:30500308-30500331 (-)	30500299	4734	Known 3'UTR
chr15:28230013-28230041 (-)	28230013	4732	Known 3'UTR
chr1:45761434-45761456 (-)	45761434	4732	Known 3'UTR
chr24:22472672-22472697 (-)	22472672	4724	Known 3'UTR
chr5:10963592-10963620 (-)	10963592	4721	Known 3'UTR
chr3:26086105-26086132 (+)	26086132	4718	Known 3'UTR
chr6:40693291-40693319 (-)	40693291	4718	Known 3'UTR
chr12:14270265-14270291 (+)	14270291	4716	Known 3'UTR
chr8:31635660-31635688 (-)	31635656	4716	Known 3'UTR
chr7:25982900-25982924 (-)	25982900	4709	Known 3'UTR
chr9:3310710-3310741 (+)	3310741	4709	Known 3'UTR
chr1:8816887-8816915 (-)	8816884	4707	Known 3'UTR
chr16:29787109-29787134 (+)	29787135	4706	Known 3'UTR
chr22:22504426-22504451 (-)	22504426	4701	Known 3'UTR
chr16:57920589-57920617 (-)	57920589	4695	Known 3'UTR
chr19:34195543-34195569 (+)	34195569	4695	Known 3'UTR
chr18:39879544-39879567 (+)	39879559	4694	Known 3'UTR
chr11:45644482-45644509 (-)	45644488	4694	Novel 3'UTR
chr21:20410276-20410303 (-)	20410276	4690	Known 3'UTR
chr5:63851253-63851281 (-)	63851255	4688	Known 3'UTR
chr3:15773659-15773687 (-)	15773659	4687	Known 3'UTR
chr24:25701250-25701276 (-)	25701244	4685	Known 3'UTR
chr17:10644481-10644509 (-)	10644483	4683	Novel 3'UTR
chr19:43861664-43861688 (+)	43861680	4682	Known 3'UTR
Zv9_scaffold3563:259138-259164 (+)	259172	4682	Novel 3'UTR
chrM:6761-6790 (+)	6792	4682	Mitochondria
chr18:1091678-1091702 (-)	1091675	4680	Novel 3'UTR
chr21:42299346-42299371 (-)	42299348	4677	Known 3'UTR
chr14:27422509-27422540 (-)	27422516	4669	Known 3'UTR
chr18:22502262-22502287 (-)	22502262	4666	Known 3'UTR
chr1:60300366-60300390 (+)	60300396	4665	Novel 3'UTR
chr6:39924469-39924496 (-)	39924469	4664	Known 3'UTR
chr6:52616451-52616479 (-)	52616460	4662	Novel 3'UTR
chr2:43765427-43765449 (-)	43765422	4661	Known 3'UTR
chr24:31197617-31197645 (-)	31197621	4658	Known 3'UTR
chr16:361696-361723 (+)	361722	4656	Known 3'UTR
chr9:6648574-6648603 (-)	6648574	4655	Known 3'UTR
chr22:39408419-39408449 (-)	39408412	4652	Known 3'UTR
chr14:34393485-34393513 (-)	34393493	4651	Known 3'UTR
chr25:3764502-3764528 (-)	3764510	4648	Known 3'UTR
chr16:30827538-30827564 (+)	30827565	4645	Known 3'UTR
chr8:27738838-27738861 (+)	27738861	4644	Novel 3'UTR
chr8:7916001-7916030 (+)	7916021	4643	Known 3'UTR
chr17:21900574-21900601 (+)	21900603	4638	Unannotated region
chr19:31655531-31655561 (-)	31655531	4636	Known 3'UTR
chr24:23850261-23850285 (-)	23850261	4633	Known 3'UTR
chr2:152149-152177 (+)	152184	4633	Novel 3'UTR
chr16:41610147-41610173 (+)	41610170	4628	Known 3'UTR
chr18:25538535-25538558 (-)	25538535	4618	Known 3'UTR
chr22:10670884-10670914 (-)	10670884	4618	Known 3'UTR
chr18:335232-335259 (+)	335262	4616	Known 3'UTR
chr5:3081051-3081079 (-)	3081053	4614	Known 3'UTR
chr13:7634148-7634172 (+)	7634174	4608	Known 3'UTR
chr13:724207-724231 (+)	724231	4607	Known 3'UTR
chr11:15013109-15013136 (-)	15013116	4605	Novel 3'UTR
chr24:21668132-21668158 (-)	21668140	4594	Known 3'UTR
chr8:11367222-11367250 (-)	11367222	4588	Known 3'UTR
chr1:47164176-47164205 (-)	47164182	4588	Novel 3'UTR
chr21:6778715-6778741 (+)	6778738	4581	Unannotated region
chr6:19304714-19304742 (+)	19304742	4576	Known 3'UTR
chr24:31462620-31462648 (+)	31462654	4576	Novel 3'UTR
chr5:23899076-23899098 (-)	23899076	4568	Novel 3'UTR
chr18:5636192-5636220 (+)	5636223	4563	Known 3'UTR
chr14:29048609-29048632 (-)	29048609	4562	Known 3'UTR
chr6:19365853-19365880 (-)	19365848	4561	Novel 3'UTR
chr9:31523819-31523847 (-)	31523812	4548	Known 3'UTR
chr5:24467307-24467333 (+)	24467339	4548	Known 3'UTR
chr19:33186466-33186495 (+)	33186491	4547	Novel 3'UTR
chr24:21792043-21792067 (+)	21792067	4540	Novel 3'UTR
chr5:33632985-33633015 (+)	33633015	4538	Known 3'UTR
chr10:17721355-17721382 (+)	17721387	4536	Known 3'UTR
chr22:15865503-15865532 (-)	15865511	4535	Known 3'UTR
chr13:31616795-31616823 (-)	31616800	4529	Known 3'UTR
chr17:4153094-4153117 (+)	4153123	4526	Known 3'UTR
chr6:2219833-2219857 (-)	2219833	4525	Known 3'UTR
chr19:7622779-7622802 (+)	7622797	4523	Novel 3'UTR
chr6:13904196-13904221 (-)	13904196	4520	Known 3'UTR
chr17:43521048-43521073 (+)	43521066	4516	Known 3'UTR
chr24:21549814-21549840 (-)	21549814	4515	Known 3'UTR
chr25:1209464-1209490 (+)	1209490	4511	Novel 3'UTR
chr3:35674507-35674539 (-)	35674510	4510	Known 3'UTR
chr6:9921905-9921928 (+)	9921928	4508	Novel 3'UTR
chr20:40507308-40507333 (-)	40507306	4507	Known 3'UTR
chr13:22383493-22383522 (+)	22383522	4507	Novel 3'UTR
chr13:11585273-11585300 (+)	11585295	4504	Known 3'UTR
chr24:17765147-17765174 (+)	17765170	4502	Known 3'UTR
chr22:539372-539397 (+)	539397	4502	Known 3'UTR
chr10:2722655-2722681 (-)	2722655	4502	Known 3'UTR
chr20:34018281-34018307 (+)	34018304	4500	Known 3'UTR
chr18:20222096-20222119 (-)	20222089	4494	Known 3'UTR
chr13:319432-319457 (+)	319465	4494	Known 3'UTR
chr21:28860487-28860514 (-)	28860487	4489	Known 3'UTR
chr5:25595419-25595448 (+)	25595452	4483	Known 3'UTR
chr16:45993404-45993433 (+)	45993436	4481	Known 3'UTR
chr5:69190683-69190712 (+)	69190716	4477	Novel 3'UTR
chr6:30543717-30543744 (-)	30543717	4467	Known 3'UTR
chr20:49073966-49073994 (+)	49074000	4467	Novel 3'UTR
chr6:40401349-40401379 (+)	40401379	4466	Known 3'UTR
chr7:31546271-31546299 (+)	31546297	4459	Known 3'UTR
chr9:49173963-49173989 (-)	49173963	4457	Novel 3'UTR
chr18:36654099-36654125 (-)	36654103	4456	Known 3'UTR
chr21:26390277-26390305 (-)	26390277	4456	Novel 3'UTR
chr20:23842885-23842911 (+)	23842904	4450	Known 3'UTR
chr4:18988965-18988995 (+)	18988992	4449	Known 3'UTR
chr5:29642687-29642712 (-)	29642690	4449	Novel 3'UTR
chr1:8194188-8194217 (-)	8194189	4445	Known 3'UTR
chr17:10608401-10608429 (+)	10608426	4443	Known 3'UTR
chr17:45239546-45239574 (-)	45239542	4438	Known 3'UTR
chr8:2760355-2760380 (-)	2760355	4433	Known 3'UTR
chr13:36980094-36980122 (-)	36980091	4433	Known 3'UTR
chr2:16918147-16918175 (-)	16918147	4433	Known 3'UTR
[truncated: 193,200 more rows]
