# Supplementary material for: Extensive alternative polyadenylation during zebrafish development
Source: HighWire-hosted journal article supplement (doi:10.1101/gr.139733.112), 2012-06-21
Supplement: TableS3.xlsx [file TableS3.xlsx]

## Sheet: Sheet1
Name	Transcripts (, delimited)	Position	Strand	Annotated 3' ends	Verdict	3'UTR ends	Longest original UTR	Longest 3'UTR after 3P-Seq reannotation	Chosen 3'UTR (longest and supported by >10% of the reads in at least one sample), only for genes with a single stop codon	All 3'UTRs - the format is "Category<tab>Total reads for category<tab>Total sites for category" followed by (tab-delimited) position<tab>Number of reads at position pairs.
CABZ01022254.1	ENSDART00000127092 CABZ01022254.1 Zv9_NA10:29174-34103 (-)	Zv9_NA10:29174-34103	-	0	No 3P tags	-	0	0
tec	ENSDART00000123196 tec Zv9_NA110:3426-25563 (+)	Zv9_NA110:3420-25563	+	0	No 3P tags	-	0	0
CABZ01111604.1	ENSDART00000129152 CABZ01111604.1 Zv9_NA113:21-9777 (-)	Zv9_NA113:21-9777	-	0	No 3P tags	-	0	0
PBX4 (2 of 2)	ENSDART00000127078 PBX4 (2 of 2) Zv9_NA116:3880-6636 (+)	Zv9_NA116:3880-6636	+	0	No 3P tags	-	0	0
CABZ01002188.1	ENSDART00000124576 CABZ01002188.1 Zv9_NA117:8757-13415 (-)	Zv9_NA117:8757-13415	-	0	Only extended	1	0	372	Zv9_NA117:8385-8757	Novel 3'UTR (Extended)	6	1	8385	6
CABZ01089783.1	ENSDART00000121547 CABZ01089783.1 Zv9_NA118:9406-20981 (+)	Zv9_NA118:4161-20981	+	0	No 3P tags	-	0	0
ppp4r1	ENSDART00000062798 ppp4r1 Zv9_NA119:1076-3884 (-)	Zv9_NA119:1076-3884	-	0	None associated with 3' UTR	0	0	0
FAM19A2	ENSDART00000128989 FAM19A2 Zv9_NA123:15078-15805 (+), ENSDART00000114283 FAM19A2 Zv9_NA123:15090-16207 (+)	Zv9_NA123:15078-16207	+	0	None associated with 3' UTR	0	0	0
SLC16A7	ENSDART00000130360 SLC16A7 Zv9_NA123:35157-44906 (-), ENSDART00000110209 SLC16A7 Zv9_NA123:39152-44920 (-)	Zv9_NA123:35157-44920	-	1	Only annotated	1	295	295		Known 3'UTR	11	1	39152	11
CABZ01099883.1	ENSDART00000046553 CABZ01099883.1 Zv9_NA124:22-8255 (+)	Zv9_NA124:22-8255	+	0	No 3P tags	-	0	0
CABZ01099885.1	ENSDART00000122570 CABZ01099885.1 Zv9_NA124:8680-20406 (+)	Zv9_NA124:8680-20406	+	0	None associated with 3' UTR	0	0	0
CAMKK2 (1 of 2)	ENSDART00000123394 CAMKK2 (1 of 2) Zv9_NA125:2480-7095 (-)	Zv9_NA125:2480-7095	-	0	No 3P tags	-	0	0
HMGXB4 (2 of 2)	ENSDART00000130435 HMGXB4 (2 of 2) Zv9_NA129:4182-8616 (+)	Zv9_NA129:4182-8616	+	0	None associated with 3' UTR	0	0	0
ROCK2 (2 of 11)	ENSDART00000122591 ROCK2 (2 of 11) Zv9_NA131:4576-8351 (+)	Zv9_NA131:4576-8351	+	0	None associated with 3' UTR	0	0	0
FIG4 (2 of 2)	ENSDART00000054706 FIG4 (2 of 2) Zv9_NA132:11655-36096 (-), NM_001114623 FIG4 Zv9_NA132:11763-30529 (-)	Zv9_NA132:11655-36096	-	0	None associated with 3' UTR	0	0	0
EPHA10 (2 of 2)	NM_001205822 EPHA10 Zv9_NA135:979-9835 (+), ENSDART00000064388 EPHA10 (2 of 2) Zv9_NA135:976-11941 (+)	Zv9_NA135:976-11941	+	0	None associated with 3' UTR	0	0	0
PREP (2 of 2)	ENSDART00000064387 PREP (2 of 2) Zv9_NA135:25442-29694 (-)	Zv9_NA135:25441-29694	-	1	Only extended	4	1	2392	Zv9_NA135:23050-25442	Novel 3'UTR (Extended)	122	4	23050	101	23202	12	23347	5	23774	4
CABZ01038802.1	ENSDART00000126389 CABZ01038802.1 Zv9_NA136:7310-10664 (-)	Zv9_NA136:7310-10664	-	0	No 3P tags	-	0	0
DMXL1 (1 of 3)	ENSDART00000128864 DMXL1 (1 of 3) Zv9_NA137:10027-10416 (+)	Zv9_NA137:10027-10416	+	0	No 3P tags	-	0	0
CABZ01032488.1	ENSDART00000123107 CABZ01032488.1 Zv9_NA141:4493-15048 (-), NM_001111576 rf2c Zv9_NA141:5244-15120 (-)	Zv9_NA141:4493-15120	-	0	Only extended	1	0	215	Zv9_NA141:4347-4493	Novel 3'UTR (Extended)	97	1	4347	97
CABZ01073004.1	ENSDART00000098962 CABZ01073004.1 Zv9_NA15:6289-17553 (+), ENSDART00000100930 CABZ01073004.1 Zv9_NA15:957-17553 (+)	Zv9_NA15:957-17553	+	1	Annotated and revised	5	5706	5706	Zv9_NA15:11755-17553	Known 3'UTR	1003	1	17553	1003	Novel 3'UTR (Shortened)	39	4	14851	6	15172	5	17403	4	17427	24
-	ENSDART00000114063 Zv9_NA150:418-12649 (-)	Zv9_NA150:418-12649	-	0	No 3P tags	-	0	0
MDGA2 (2 of 3)	ENSDART00000124684 MDGA2 (2 of 3) Zv9_NA152:393-53445 (-)	Zv9_NA152:393-53445	-	0	None associated with 3' UTR	0	0	0
trim32	ENSDART00000111216 trim32 Zv9_NA154:29809-32054 (-)	Zv9_NA154:29809-32054	-	1	Only extended	3	229	2763	Zv9_NA154:27798-30038	Novel 3'UTR (Extended)	536	3	27275	6	27798	267	29659	263
ASTN2 (3 of 3)	ENSDART00000126539 ASTN2 (3 of 3) Zv9_NA154:16740-19552 (+)	Zv9_NA154:16740-19552	+	0	No 3P tags	-	0	0
CABZ01025311.1	ENSDART00000109551 CABZ01025311.1 Zv9_NA156:36961-59463 (+)	Zv9_NA156:36961-59463	+	0	None associated with 3' UTR	0	0	0
CABZ01088071.1	ENSDART00000130296 CABZ01088071.1 Zv9_NA160:409-4759 (-)	Zv9_NA160:409-4759	-	0	Only extended	1	0	344	Zv9_NA160:65-409	Novel 3'UTR (Extended)	1806	1	65	1806
FBF1	ENSDART00000131088 FBF1 Zv9_NA163:2937-15295 (+)	Zv9_NA163:2937-15295	+	1	Only annotated	2	52	55	Zv9_NA163:15243-15298	Known 3'UTR	426	2	15298	402	15308	24
ROCK2 (8 of 11)	NM_001182999 CBK1 Zv9_NA164:3854-7751 (-), ENSDART00000078593 ROCK2 (8 of 11) Zv9_NA164:1956-7721 (-)	Zv9_NA164:1956-7751	-	0	None associated with 3' UTR	0	0	0
zgc:77614	ENSDART00000109864 zgc:77614 Zv9_NA166:9944-11457 (+)	Zv9_NA166:9944-11457	+	0	No 3P tags	-	0	0
CABZ01079005.1	ENSDART00000112707 CABZ01079005.1 Zv9_NA17:38197-46112 (+)	Zv9_NA17:38197-46112	+	0	No 3P tags	-	0	0
CABZ01030692.1	ENSDART00000122214 CABZ01030692.1 Zv9_NA175:3352-47162 (-)	Zv9_NA175:3350-47162	-	0	None associated with 3' UTR	0	0	0
pde8a	ENSDART00000127815 pde8a Zv9_NA18:65-2716 (+)	Zv9_NA18:65-2716	+	0	Only extended	2	0	251	Zv9_NA18:2716-3553	Novel 3'UTR (Extended)	170	2	3521	23	3553	147
CABZ01084869.1	ENSDART00000124929 CABZ01084869.1 Zv9_NA185:812-25938 (-)	Zv9_NA185:812-25938	-	0	No 3P tags	-	0	0
CABZ01058171.1	ENSDART00000125940 CABZ01058171.1 Zv9_NA186:3763-20122 (+)	Zv9_NA186:3763-20122	+	0	No 3P tags	-	0	0
CABZ01053381.1	NM_172794 Zfp454 Zv9_NA189:9323-19176 (-), ENSDART00000126526 CABZ01053381.1 Zv9_NA189:9004-34821 (-)	Zv9_NA189:9004-34821	-	0	None associated with 3' UTR	0	0	0
MRPS16	NM_001016347 mrps16 Zv9_NA192:18072-22018 (+), ENSDART00000123111 MRPS16 Zv9_NA192:15876-22657 (+)	Zv9_NA192:15876-22657	+	1	Annotated and revised	6	576	581	Zv9_NA192:22081-22350	Known 3'UTR	372	1	22662	372	Novel 3'UTR (Shortened)	6856	5	22176	47	22188	53	22236	186	22339	30	22350	6540
CABZ01087025.1	ENSDART00000130376 CABZ01087025.1 Zv9_NA192:39655-46498 (+)	Zv9_NA192:39655-46498	+	0	No 3P tags	-	0	0
ROCK2 (6 of 11)	ENSDART00000122163 ROCK2 (6 of 11) Zv9_NA195:3873-6039 (+)	Zv9_NA195:3873-6039	+	0	No 3P tags	-	0	0
CABZ01019032.1	ENSDART00000125811 CABZ01019032.1 Zv9_NA196:4047-5403 (+)	Zv9_NA196:4047-5403	+	0	No 3P tags	-	0	0
CABZ01019032.3	ENSDART00000125603 CABZ01019032.3 Zv9_NA196:588-1775 (-)	Zv9_NA196:588-1775	-	0	No 3P tags	-	0	0
CABZ01079304.1	NM_001077017 ZNF566 Zv9_NA199:11857-12397 (+), ENSDART00000097135 CABZ01079304.1 Zv9_NA199:11704-21951 (+)	Zv9_NA199:11704-21951	+	1	None associated with 3' UTR	0	39	0
CABZ01024333.1	ENSDART00000127287 CABZ01024333.1 Zv9_NA200:1942-10546 (+)	Zv9_NA200:1942-10546	+	0	No 3P tags	-	0	0
CABZ01083267.1	ENSDART00000124216 CABZ01083267.1 Zv9_NA201:3555-12121 (-)	Zv9_NA201:3555-12121	-	0	No 3P tags	-	0	0
SLC44A2 (2 of 2)	ENSDART00000015507 SLC44A2 (2 of 2) Zv9_NA203:8878-52872 (+)	Zv9_NA203:8878-52872	+	0	None associated with 3' UTR	0	0	0
FKBP15 (2 of 4)	ENSDART00000083443 FKBP15 (2 of 4) Zv9_NA208:42-26769 (-)	Zv9_NA208:42-26769	-	0	No 3P tags	-	0	0
SLC44A1 (3 of 3)	ENSDART00000123435 SLC44A1 (3 of 3) Zv9_NA213:1546-27528 (+)	Zv9_NA213:1546-27528	+	0	No 3P tags	-	0	0
gnrhr1	NM_204653 CGNRH-R Zv9_NA22:30594-42601 (-), ENSDART00000061346 gnrhr1 Zv9_NA22:30453-43051 (-)	Zv9_NA22:30453-43051	-	0	None associated with 3' UTR	0	0	0
CABZ01073054.1	NM_001096646 sh3rf3 Zv9_NA221:4079-4331 (+), ENSDART00000091103 CABZ01073054.1 Zv9_NA221:4085-5142 (+)	Zv9_NA221:4079-5142	+	0	Only annotated	1	0	56	Zv9_NA221:5142-5198	Known 3'UTR	13	1	5198	13
TAAR1 (8 of 9)	ENSDART00000127531 TAAR1 (8 of 9) Zv9_NA223:9753-11180 (+)	Zv9_NA223:9753-11180	+	1	No 3P tags	-	215	215
TAAR1 (7 of 9)	ENSDART00000123344 TAAR1 (7 of 9) Zv9_NA223:6228-7141 (+)	Zv9_NA223:6228-7141	+	0	Only extended	1	0	331	Zv9_NA223:7141-7472	Novel 3'UTR (Extended)	14	1	7472	14
CABZ01060453.1	ENSDART00000110636 CABZ01060453.1 Zv9_NA224:1558-4272 (-)	Zv9_NA224:1558-4272	-	0	None associated with 3' UTR	0	0	0
KMO (2 of 2)	ENSDART00000124522 KMO (2 of 2) Zv9_NA226:3549-9608 (+)	Zv9_NA226:3549-9608	+	0	No 3P tags	-	0	0
CABZ01117437.1	ENSDART00000059607 CABZ01117437.1 Zv9_NA229:14078-37029 (-)	Zv9_NA229:14078-37029	-	0	No 3P tags	-	0	0
WDR77	ENSDART00000131000 WDR77 Zv9_NA232:22678-34551 (-)	Zv9_NA232:22678-34551	-	0	Only extended	1	0	231	Zv9_NA232:22447-22678	Novel 3'UTR (Extended)	2648	1	22447	2648
FMN1 (1 of 3)	ENSDART00000130502 FMN1 (1 of 3) Zv9_NA233:7624-45605 (-), NM_204423 FMN1 Zv9_NA233:7690-45674 (-)	Zv9_NA233:7624-45674	-	0	No 3P tags	-	0	0
ZFP36	ENSDART00000065199 ZFP36 Zv9_NA234:5621-7517 (+), ENSDART00000109427 ZFP36 Zv9_NA234:5635-7517 (+)	Zv9_NA234:5621-7517	+	1	Only annotated	1	763	763	Zv9_NA234:6754-7517	Known 3'UTR	6431	1	7517	6431
wu:fy63c09	ENSDART00000109979 wu:fy63c09 Zv9_NA235:148-16784 (-)	Zv9_NA235:148-16784	-	0	No 3P tags	-	0	0
mcm2	ENSDART00000114363 mcm2 Zv9_NA237:11388-31977 (-), ENSDART00000049626 mcm2 Zv9_NA237:11388-31977 (-), ENSDART00000006598 mcm2 Zv9_NA237:11461-31970 (-)	Zv9_NA237:11388-31977	-	2	Only annotated	2	261	261	Zv9_NA237:11388-11649	Known 3'UTR	6674	2	11388	6647	11398	27
CABZ01086824.1	ENSDART00000061377 CABZ01086824.1 Zv9_NA243:35227-56323 (-)	Zv9_NA243:35227-56323	-	0	Only extended	1	0	398	Zv9_NA243:34829-35227	Novel 3'UTR (Extended)	109	1	34829	109
CABZ01072904.1	ENSDART00000054512 CABZ01072904.1 Zv9_NA248:878-4615 (+)	Zv9_NA248:878-4615	+	0	No 3P tags	-	0	0
CABZ01001448.1	ENSDART00000127535 CABZ01001448.1 Zv9_NA249:2638-3890 (+)	Zv9_NA249:2638-3890	+	0	No 3P tags	-	0	0
CABZ01001466.1	ENSDART00000124805 CABZ01001466.1 Zv9_NA250:2-5858 (-)	Zv9_NA250:2-5858	-	0	No 3P tags	-	0	0
CABZ01061549.1	ENSDART00000130631 CABZ01061549.1 Zv9_NA251:31041-47548 (-), NM_001128908 zf(c2h2)-138 Zv9_NA251:30906-31894 (-)	Zv9_NA251:30906-47548	-	0	None associated with 3' UTR	0	0	0
CABZ01048402.1	ENSDART00000124834 CABZ01048402.1 Zv9_NA255:1922-25160 (-), NM_001012821 ZFP92 Zv9_NA255:4812-25151 (-)	Zv9_NA255:1922-25160	-	0	None associated with 3' UTR	0	0	0
CABZ01029904.1	ENSDART00000114093 CABZ01029904.1 Zv9_NA257:89255-94080 (+)	Zv9_NA257:89255-94080	+	0	No 3P tags	-	0	0
CABZ01029902.2	ENSDART00000125741 CABZ01029902.2 Zv9_NA257:46270-47079 (-)	Zv9_NA257:46270-47079	-	0	No 3P tags	-	0	0
CABZ01029902.1	ENSDART00000111113 CABZ01029902.1 Zv9_NA257:57186-68399 (-), NM_174960 Gimap9 Zv9_NA257:57726-58119 (-)	Zv9_NA257:57186-68399	-	0	Only extended	1	0	1158	Zv9_NA257:56568-57186	Novel 3'UTR (Extended)	25	1	56568	25
CCDC134 (1 of 2)	ENSDART00000108803 CCDC134 (1 of 2) Zv9_NA257:71214-81131 (-)	Zv9_NA257:71175-81131	-	0	Only extended	1	0	2083	Zv9_NA257:69131-71214	Novel 3'UTR (Extended)	195	1	69131	195
CABZ01029900.1	ENSDART00000056043 CABZ01029900.1 Zv9_NA257:14296-24505 (-)	Zv9_NA257:14296-24505	-	0	No 3P tags	-	0	0
PGBD4 (1 of 7)	ENSDART00000108620 PGBD4 (1 of 7) Zv9_NA260:1011-3880 (+)	Zv9_NA260:1011-3880	+	0	Only extended	2	0	512	Zv9_NA260:3880-4684	Novel 3'UTR (Extended)	378	2	4661	12	4684	366
CABZ01081148.1	ENSDART00000124581 CABZ01081148.1 Zv9_NA265:7912-11573 (+)	Zv9_NA265:7912-11573	+	0	Only extended	4	0	3420	Zv9_NA265:11573-14993	Novel 3'UTR (Extended)	3000	4	11960	25	14088	24	14900	257	14993	2694
CABZ01078610.1	ENSDART00000058176 CABZ01078610.1 Zv9_NA266:44403-49847 (+)	Zv9_NA266:44403-49847	+	0	No 3P tags	-	0	0
TOPORS (2 of 2)	NM_001108658 Topors Zv9_NA266:25343-33715 (+), ENSDART00000058174 TOPORS (2 of 2) Zv9_NA266:25295-34378 (+)	Zv9_NA266:25295-34378	+	1	Only annotated	2	126	129	Zv9_NA266:34252-34381	Known 3'UTR	1363	2	34360	11	34381	1352
CABZ01078611.1	ENSDART00000127278 CABZ01078611.1 Zv9_NA266:54565-57421 (+)	Zv9_NA266:54565-57421	+	0	No 3P tags	-	0	0
CABZ01003296.1	ENSDART00000130621 CABZ01003296.1 Zv9_NA267:813-3297 (-)	Zv9_NA267:813-3297	-	0	No 3P tags	-	0	0
ROCK2 (7 of 11)	NM_127606 T13C7.6; T13C7_6 Zv9_NA269:2716-4683 (-), ENSDART00000124699 ROCK2 (7 of 11) Zv9_NA269:2458-4641 (-)	Zv9_NA269:2458-4683	-	0	No 3P tags	-	0	0
MUC19	ENSDART00000080097 MUC19 Zv9_NA27:12523-54683 (-)	Zv9_NA27:12523-54683	-	0	No 3P tags	-	0	0
SLC9A3R1 (1 of 2)	ENSDART00000111295 SLC9A3R1 (1 of 2) Zv9_NA276:15949-66927 (+)	Zv9_NA276:15949-66927	+	0	None associated with 3' UTR	0	0	0
RAB37	ENSDART00000129150 RAB37 Zv9_NA276:3253-13050 (+)	Zv9_NA276:3253-13050	+	0	Only extended	4	0	1191	Zv9_NA276:13050-14241	Novel 3'UTR (Extended)	1240	4	13970	6	14092	9	14154	30	14241	1195
CASKIN2 (2 of 4)	ENSDART00000099026 CASKIN2 (2 of 4) Zv9_NA276:74313-82040 (-)	Zv9_NA276:74313-82040	-	1	Only annotated	2	3338	3339	Zv9_NA276:74312-77651	Known 3'UTR	380	2	74312	368	74369	12
CABZ01063203.1	ENSDART00000128479 CABZ01063203.1 Zv9_NA277:18577-59179 (-)	Zv9_NA277:18577-59179	-	0	No 3P tags	-	0	0
CABZ01080397.1	ENSDART00000125530 CABZ01080397.1 Zv9_NA279:1384-3125 (-), NM_001087951 pxn Zv9_NA279:1501-5079 (-)	Zv9_NA279:1384-5079	-	0	No 3P tags	-	0	0
CABZ01003344.1	ENSDART00000128219 CABZ01003344.1 Zv9_NA28:41754-95653 (-)	Zv9_NA28:41754-95653	-	0	None associated with 3' UTR	0	0	0
CABZ01003346.1	ENSDART00000127701 CABZ01003346.1 Zv9_NA28:112491-120699 (+)	Zv9_NA28:112491-120699	+	0	No 3P tags	-	0	0
CABZ01003343.1	ENSDART00000128627 CABZ01003343.1 Zv9_NA28:987-1869 (+)	Zv9_NA28:987-1869	+	0	None associated with 3' UTR	0	0	0
CABZ01086542.1	ENSDART00000122723 CABZ01086542.1 Zv9_NA280:28513-32345 (+)	Zv9_NA280:28513-32345	+	0	No 3P tags	-	0	0
CABZ01086544.1	NM_001164786 Adamts20 Zv9_NA281:10965-17134 (+), ENSDART00000124879 CABZ01086544.1 Zv9_NA281:2109-13971 (+)	Zv9_NA281:2109-17134	+	0	No 3P tags	-	0	0
CABZ01083546.1	ENSDART00000126138 CABZ01083546.1 Zv9_NA282:1294-8441 (-)	Zv9_NA282:1294-8441	-	0	None associated with 3' UTR	0	0	0
ARHGAP6	ENSDART00000128142 ARHGAP6 Zv9_NA290:33457-55823 (-)	Zv9_NA290:33457-55823	-	0	Only extended	1	0	482	Zv9_NA290:32975-33457	Novel 3'UTR (Extended)	4	1	32975	4
VPS13B (2 of 3)	ENSDART00000059370 VPS13B (2 of 3) Zv9_NA291:4611-13233 (+)	Zv9_NA291:4611-13233	+	0	No 3P tags	-	0	0
VPS13B (1 of 3)	ENSDART00000130578 VPS13B (1 of 3) Zv9_NA291:15505-16893 (+)	Zv9_NA291:15505-16893	+	0	No 3P tags	-	0	0
CABZ01024848.1	ENSDART00000108516 CABZ01024848.1 Zv9_NA295:32422-36729 (+), ENSDART00000112672 CABZ01024848.1 Zv9_NA295:28265-36729 (+), ENSDART00000129186 CABZ01024848.1 Zv9_NA295:28265-36729 (+)	Zv9_NA295:28265-36729	+	0	No 3P tags	-	0	0
CABZ01024842.1	ENSDART00000108824 CABZ01024842.1 Zv9_NA295:2443-7960 (-)	Zv9_NA295:2443-7960	-	0	No 3P tags	-	0	0
CABZ01024854.1	ENSDART00000121976 CABZ01024854.1 Zv9_NA296:7866-15415 (+), NM_001046119 ZNF32 Zv9_NA296:13141-13702 (+)	Zv9_NA296:7866-15415	+	0	No 3P tags	-	0	0
CABZ01024856.1	ENSDART00000121557 CABZ01024856.1 Zv9_NA297:51453-56497 (-)	Zv9_NA297:51453-56497	-	0	No 3P tags	-	0	0
CABZ01074888.1	ENSDART00000082033 CABZ01074888.1 Zv9_NA303:23811-52955 (-)	Zv9_NA303:23811-52955	-	0	None associated with 3' UTR	0	0	0
CABZ01074886.1	ENSDART00000127229 CABZ01074886.1 Zv9_NA303:585-8883 (-)	Zv9_NA303:585-8883	-	0	No 3P tags	-	0	0
CABZ01074890.1	ENSDART00000082016 CABZ01074890.1 Zv9_NA303:56538-67283 (+)	Zv9_NA303:56538-67283	+	0	None associated with 3' UTR	0	0	0
KCNA6 (1 of 2)	ENSDART00000131038 KCNA6 (1 of 2) Zv9_NA310:12652-14179 (-), NM_001082036 KCNA5 Zv9_NA310:12745-14077 (-)	Zv9_NA310:12652-14179	-	0	No 3P tags	-	0	0
FNDC3B (3 of 3)	ENSDART00000130256 FNDC3B (3 of 3) Zv9_NA312:508-14464 (-)	Zv9_NA312:508-14464	-	0	No 3P tags	-	0	0
DIP2C (1 of 2)	ENSDART00000125541 DIP2C (1 of 2) Zv9_NA313:3269-11830 (+)	Zv9_NA313:3269-11830	+	0	No 3P tags	-	0	0
MYH9 (2 of 3)	ENSDART00000121593 MYH9 (2 of 3) Zv9_NA320:14066-18875 (+)	Zv9_NA320:14066-18875	+	0	No 3P tags	-	0	0
NFAT5 (1 of 2)	ENSDART00000003603 NFAT5 (1 of 2) Zv9_NA324:30369-47129 (+)	Zv9_NA324:9115-47129	+	0	Only extended	3	0	5901	Zv9_NA324:47129-53030	Novel 3'UTR (Extended)	260	3	48732	4	49037	7	53030	249
SHISA6 (2 of 3)	ENSDART00000126522 SHISA6 (2 of 3) Zv9_NA325:4967-20747 (-)	Zv9_NA325:4967-20759	-	0	None associated with 3' UTR	0	0	0
DNAJC13 (1 of 2)	ENSDART00000123919 DNAJC13 (1 of 2) Zv9_NA327:6948-8174 (+)	Zv9_NA327:1-8174	+	0	None associated with 3' UTR	0	0	0
CABZ01079804.1	ENSDART00000121455 CABZ01079804.1 Zv9_NA331:108439-110923 (-)	Zv9_NA331:108439-110923	-	0	No 3P tags	-	0	0
CABZ01080599.2	ENSDART00000057015 CABZ01080599.2 Zv9_NA331:1739-8813 (+)	Zv9_NA331:1739-8813	+	0	Only extended	2	0	2820	Zv9_NA331:8813-11633	Novel 3'UTR (Extended)	437	2	11523	7	11633	430
CABZ01079804.2	ENSDART00000127315 CABZ01079804.2 Zv9_NA331:97600-107633 (+)	Zv9_NA331:97600-107633	+	0	None associated with 3' UTR	0	0	0
CABZ01080599.1	NM_001077122 MGC133804 Zv9_NA331:22861-26090 (+), ENSDART00000114844 CABZ01080599.1 Zv9_NA331:14142-26271 (+)	Zv9_NA331:14142-26271	+	2	Only annotated	1	145	147	Zv9_NA331:26126-26273	Known 3'UTR	89	1	26273	89
golim4a	ENSDART00000109191 golim4a Zv9_NA331:36511-76311 (-), ENSDART00000127546 golim4a Zv9_NA331:36541-76212 (-)	Zv9_NA331:36511-76311	-	0	None associated with 3' UTR	0	0	0
CABZ01072487.1	ENSDART00000079354 CABZ01072487.1 Zv9_NA333:471-20026 (-)	Zv9_NA333:471-20026	-	0	No 3P tags	-	0	0
CABZ01072488.1	ENSDART00000126612 CABZ01072488.1 Zv9_NA333:19102-28858 (+)	Zv9_NA333:19102-28858	+	0	Only revised	1	0	1656	Zv9_NA333:21611-24469	Novel 3'UTR (Alternative last exon)	50	1	24469	50
CABZ01080014.1	ENSDART00000126567 CABZ01080014.1 Zv9_NA337:7748-52063 (+)	Zv9_NA337:898-52063	+	0	None associated with 3' UTR	0	0	0
MEX3D	ENSDART00000125492 MEX3D Zv9_NA337:68354-69659 (-)	Zv9_NA337:64558-69659	-	1	Only extended	2	56	282	Zv9_NA337:68072-68354	Novel 3'UTR (Extended)	23	2	68072	19	68246	4
CABZ01079952.1	ENSDART00000114477 CABZ01079952.1 Zv9_NA34:16456-17155 (+)	Zv9_NA34:16456-17155	+	0	No 3P tags	-	0	0
zgc:193711	ENSDART00000113165 zgc:193711 Zv9_NA347:1506-3611 (+)	Zv9_NA347:1506-3611	+	1	Annotated and revised	4	68	275	Zv9_NA347:3543-3818	Known 3'UTR	157	2	3623	150	3671	7	Novel 3'UTR (Extended)	175	2	3752	6	3818	169
CAMTA2	ENSDART00000009586 CAMTA2 Zv9_NA357:2987-27784 (+), NM_001105801 Camta2 Zv9_NA357:3086-22246 (+)	Zv9_NA357:2987-27784	+	0	Annotated and revised	7	0	4043	Zv9_NA357:27784-31827	Known 3'UTR	18	1	27856	18	Novel 3'UTR (Extended)	2211	6	27993	66	28003	13	29393	5	30575	37	31480	4	31827	2086
CABZ01114193.1	ENSDART00000128389 CABZ01114193.1 Zv9_NA358:0-2927 (+), ENSDART00000113636 CABZ01114193.1 Zv9_NA358:0-2640 (+)	Zv9_NA358:0-2927	+	0	None associated with 3' UTR	0	0	0
SEMA7A (2 of 2)	ENSDART00000127084 SEMA7A (2 of 2) Zv9_NA360:4717-27133 (-)	Zv9_NA360:4717-27133	-	0	None associated with 3' UTR	0	0	0
prc1a	ENSDART00000121678 prc1a Zv9_NA363:2497-24251 (-), ENSDART00000129850 prc1a Zv9_NA363:2497-24251 (-)	Zv9_NA363:2497-24251	-	1	Only annotated	2	387	387		Known 3'UTR	8505	2	2487	45	2497	8460
CABZ01111793.1	ENSDART00000121830 CABZ01111793.1 Zv9_NA364:2551-13760 (+)	Zv9_NA364:2551-13760	+	0	No 3P tags	-	0	0
CABZ01075684.1	ENSDART00000124058 CABZ01075684.1 Zv9_NA365:2690-11890 (-)	Zv9_NA365:2690-11890	-	0	No 3P tags	-	0	0
CABZ01075684.2	ENSDART00000099553 CABZ01075684.2 Zv9_NA365:13267-14875 (-)	Zv9_NA365:13267-14875	-	0	No 3P tags	-	0	0
OFCC1	ENSDART00000125114 OFCC1 Zv9_NA372:125960-205798 (-), NM_001122920 opo Zv9_NA372:152151-201255 (-)	Zv9_NA372:125960-205798	-	0	Only extended	1	0	452	Zv9_NA372:125508-125960	Novel 3'UTR (Extended)	43	1	125508	43
CABZ01003056.1	ENSDART00000100028 CABZ01003056.1 Zv9_NA376:3951-9664 (+)	Zv9_NA376:3951-9664	+	0	No 3P tags	-	0	0
CABZ01015815.1	ENSDART00000129879 CABZ01015815.1 Zv9_NA382:48607-58032 (+)	Zv9_NA382:48607-58032	+	0	None associated with 3' UTR	0	0	0
SSH3 (2 of 2)	ENSDART00000108667 SSH3 (2 of 2) Zv9_NA383:689-7646 (+)	Zv9_NA383:689-7646	+	0	None associated with 3' UTR	0	0	0
SLC12A2 (4 of 5)	ENSDART00000129004 SLC12A2 (4 of 5) Zv9_NA384:70700-79190 (+)	Zv9_NA384:70700-79190	+	0	No 3P tags	-	0	0
CABZ01063534.1	ENSDART00000124323 CABZ01063534.1 Zv9_NA384:542-3468 (+)	Zv9_NA384:542-3468	+	0	None associated with 3' UTR	0	0	0
GRAMD3	ENSDART00000126208 GRAMD3 Zv9_NA384:39225-61471 (+)	Zv9_NA384:39225-61471	+	0	Only extended	1	0	1620	Zv9_NA384:61471-63091	Novel 3'UTR (Extended)	10	1	63091	10
NUDT12	ENSDART00000063158 NUDT12 Zv9_NA384:16845-32259 (-)	Zv9_NA384:16845-32259	-	0	Only extended	2	0	257	Zv9_NA384:16588-16845	Novel 3'UTR (Extended)	1132	2	16578	314	16588	818
WSCD1 (3 of 3)	ENSDART00000084736 WSCD1 (3 of 3) Zv9_NA392:52028-55126 (+)	Zv9_NA392:52028-55126	+	0	No 3P tags	-	0	0
CABZ01087282.2	ENSDART00000128337 CABZ01087282.2 Zv9_NA395:33863-34631 (-)	Zv9_NA395:33863-34631	-	0	No 3P tags	-	0	0
CABZ01087282.1	ENSDART00000112264 CABZ01087282.1 Zv9_NA395:165-15589 (-)	Zv9_NA395:165-15589	-	0	No 3P tags	-	0	0
CABZ01088713.1	ENSDART00000065424 CABZ01088713.1 Zv9_NA398:5994-31385 (-)	Zv9_NA398:5994-34180	-	0	No 3P tags	-	0	0
DYNC1I1 (1 of 2)	ENSDART00000039186 DYNC1I1 (1 of 2) Zv9_NA399:15234-82835 (+)	Zv9_NA399:15234-82835	+	0	None associated with 3' UTR	0	0	0
CABZ01079864.1	ENSDART00000128228 CABZ01079864.1 Zv9_NA4:8832-18104 (-)	Zv9_NA4:8832-18104	-	0	No 3P tags	-	0	0
WDR48 (1 of 3)	ENSDART00000065267 WDR48 (1 of 3) Zv9_NA402:577-9924 (+)	Zv9_NA402:577-9924	+	0	Only annotated	1	0	45	Zv9_NA402:9924-9969	Known 3'UTR	5	1	9969	5
SYNPO	ENSDART00000122237 SYNPO Zv9_NA403:44368-57460 (-)	Zv9_NA403:44368-57460	-	0	None associated with 3' UTR	0	0	0
MAP4 (1 of 3)	ENSDART00000109028 MAP4 (1 of 3) Zv9_NA405:9248-11519 (-)	Zv9_NA405:9248-11519	-	0	No 3P tags	-	0	0
CABZ01072948.1	ENSDART00000086815 CABZ01072948.1 Zv9_NA407:35017-47618 (+)	Zv9_NA407:35017-47618	+	0	No 3P tags	-	0	0
BPHL	NM_001037206 Bphl Zv9_NA409:18549-23962 (+), ENSDART00000129538 BPHL Zv9_NA409:17996-35362 (+)	Zv9_NA409:17996-35362	+	0	Annotated and revised	6	0	585	Zv9_NA409:35362-35445	Known 3'UTR	2981	2	23975	9	35445	2972	Novel 3'UTR (Extended)	906	4	35467	15	35710	19	35853	834	35957	38
CABZ01080054.1	ENSDART00000108490 CABZ01080054.1 Zv9_NA41:1349-60360 (-)	Zv9_NA41:1349-60360	-	0	No 3P tags	-	0	0
CABZ01075923.1	ENSDART00000082051 CABZ01075923.1 Zv9_NA414:7417-15729 (+)	Zv9_NA414:7417-15729	+	0	None associated with 3' UTR	0	0	0
ASTN2 (1 of 3)	ENSDART00000125648 ASTN2 (1 of 3) Zv9_NA418:13974-26980 (-)	Zv9_NA418:13974-26980	-	0	No 3P tags	-	0	0
ABCD2 (1 of 2)	ENSDART00000128027 ABCD2 (1 of 2) Zv9_NA422:1730-16840 (+)	Zv9_NA422:1730-16840	+	0	None associated with 3' UTR	0	0	0
HUS1B	ENSDART00000087478 HUS1B Zv9_NA426:10765-13534 (+)	Zv9_NA426:10765-13534	+	1	Annotated and revised	2	148	263	Zv9_NA426:13386-13534	Known 3'UTR	693	1	13534	693	Novel 3'UTR (Extended)	6	1	13649	6
CABZ01071642.2	ENSDART00000129311 CABZ01071642.2 Zv9_NA428:47892-73081 (+)	Zv9_NA428:47892-73081	+	0	No 3P tags	-	0	0
CLCN2	NM_001082751 CLCN2 Zv9_NA428:31536-130208 (-), ENSDART00000089279 CLCN2 Zv9_NA428:31422-130220 (-)	Zv9_NA428:31422-130220	-	0	Only extended	1	0	365	Zv9_NA428:25775-31422	Novel 3'UTR (Extended)	53	1	25775	53
hspb12	ENSDART00000128824 hspb12 Zv9_NA428:3863-16021 (+)	Zv9_NA428:3863-16021	+	0	Only extended	1	0	1359	Zv9_NA428:16021-17399	Novel 3'UTR (Extended)	99	1	17399	99
FAM179B	ENSDART00000057266 FAM179B Zv9_NA429:50203-63890 (+)	Zv9_NA429:50203-63890	+	0	None associated with 3' UTR	0	0	0
CZv9_NA429H14orf28	ENSDART00000111290 CZv9_NA429H14orf28 Zv9_NA429:4132-10573 (+), NM_001017923 C14orf28 Zv9_NA429:4123-9726 (+)	Zv9_NA429:4123-10573	+	0	Only extended	4	0	2344	Zv9_NA429:10573-12070	Novel 3'UTR (Extended)	410	4	10097	7	11348	4	11716	15	12070	384
KLHL28	ENSDART00000092737 KLHL28 Zv9_NA429:20022-25212 (-)	Zv9_NA429:20022-28684	-	0	None associated with 3' UTR	0	0	0
CABZ01032951.1	ENSDART00000124007 CABZ01032951.1 Zv9_NA436:6117-19636 (+), NM_001141764 s47a1 Zv9_NA436:6796-19549 (+)	Zv9_NA436:6117-19636	+	0	Only extended	1	0	715	Zv9_NA436:19636-20264	Novel 3'UTR (Extended)	8	1	20264	8
CABZ01093494.1	ENSDART00000131062 CABZ01093494.1 Zv9_NA437:27117-33285 (+)	Zv9_NA437:27117-33285	+	0	No 3P tags	-	0	0
zgc:153411	ENSDART00000092756 zgc:153411 Zv9_NA437:2643-23655 (-)	Zv9_NA437:2643-23655	-	1	Annotated and revised	2	552	557	Zv9_NA437:2788-3195	Known 3'UTR	36	1	2638	36	Novel 3'UTR (Shortened)	254	1	2788	254
CABZ01079753.1	ENSDART00000126707 CABZ01079753.1 Zv9_NA437:33842-35526 (+)	Zv9_NA437:33842-35526	+	0	No 3P tags	-	0	0
CABZ01112049.2	ENSDART00000126980 CABZ01112049.2 Zv9_NA447:521-10065 (+)	Zv9_NA447:521-10065	+	1	Only annotated	2	196	196	Zv9_NA447:9869-10065	Known 3'UTR	230	2	10054	6	10065	224
CABZ01112049.1	ENSDART00000111693 CABZ01112049.1 Zv9_NA447:18069-36827 (+)	Zv9_NA447:18069-36827	+	0	No 3P tags	-	0	0
SPTBN5	ENSDART00000130717 SPTBN5 Zv9_NA454:5702-17087 (+)	Zv9_NA454:5612-17087	+	0	No 3P tags	-	0	0
CABZ01102076.1	ENSDART00000126023 CABZ01102076.1 Zv9_NA456:4891-6997 (-)	Zv9_NA456:4891-6997	-	0	No 3P tags	-	0	0
CABZ01088013.1	ENSDART00000112094 CABZ01088013.1 Zv9_NA461:22626-70442 (+)	Zv9_NA461:22626-70442	+	0	No 3P tags	-	0	0
TMEM164	NM_001199357 Tmem164 Zv9_NA463:17399-28016 (+), ENSDART00000097663 TMEM164 Zv9_NA463:11383-28103 (+)	Zv9_NA463:11383-28103	+	0	Only extended	1	0	273	Zv9_NA463:28103-28289	Novel 3'UTR (Extended)	23	1	28289	23
CABZ01074133.1	ENSDART00000111540 CABZ01074133.1 Zv9_NA466:31555-144310 (-)	Zv9_NA466:31555-144310	-	0	Only extended	3	0	4886	Zv9_NA466:26669-31555	Novel 3'UTR (Extended)	178	3	26669	166	26998	7	31281	5
CABZ01074130.1	NM_077291 col-176 Zv9_NA466:3015-18522 (+), ENSDART00000122269 CABZ01074130.1 Zv9_NA466:276-23564 (+)	Zv9_NA466:276-23564	+	1	Annotated and revised	3	480	484	Zv9_NA466:23084-23568	Known 3'UTR	668	1	23568	668	Novel 3'UTR (Shortened)	577	2	23287	15	23347	562
pmt	ENSDART00000097767 pmt Zv9_NA47:37272-47148 (-)	Zv9_NA47:37272-47148	-	0	Only extended	1	0	153	Zv9_NA47:37119-37272	Novel 3'UTR (Extended)	169	1	37119	169
MORC4	ENSDART00000079729 MORC4 Zv9_NA47:9455-34743 (-), NM_001079457 morc3 Zv9_NA47:14874-34538 (-)	Zv9_NA47:9455-34743	-	1	Only annotated	1	411	413	Zv9_NA47:9453-14799	Known 3'UTR	10	1	9453	10
CABZ01067727.1	ENSDART00000109768 CABZ01067727.1 Zv9_NA470:3057-45992 (-)	Zv9_NA470:3057-45992	-	0	No 3P tags	-	0	0
ccnf	ENSDART00000043144 ccnf Zv9_NA470:52951-84764 (-), NM_001086432 ccnf Zv9_NA470:57021-77669 (-)	Zv9_NA470:52951-84764	-	1	Annotated and revised	7	998	1070	Zv9_NA470:52951-53949	Known 3'UTR	1337	4	52879	17	52938	38	52951	1273	52962	9	Novel 3'UTR (Extended)	5	1	56752	5	Novel 3'UTR (Shortened)	74	2	53084	66	53136	8
edar	NM_001104759 edar Zv9_NA472:49338-88390 (+), ENSDART00000045290 edar Zv9_NA472:18863-88448 (+)	Zv9_NA472:18863-88448	+	1	No 3P tags	-	1	1
CCDC138	ENSDART00000125823 CCDC138 Zv9_NA472:102325-103337 (-)	Zv9_NA472:102325-103337	-	1	Only annotated	1	181	181	Zv9_NA472:102325-102506	Known 3'UTR	403	1	102325	403
CABZ01030429.1	ENSDART00000042340 CABZ01030429.1 Zv9_NA476:9126-9668 (+)	Zv9_NA476:9126-9668	+	0	No 3P tags	-	0	0
LAMP1 (2 of 2)	ENSDART00000076287 LAMP1 (2 of 2) Zv9_NA478:1735-5922 (-)	Zv9_NA478:1735-5922	-	0	No 3P tags	-	0	0
ATE1	ENSDART00000127375 ATE1 Zv9_NA48:15557-87808 (+)	Zv9_NA48:15557-87808	+	0	No 3P tags	-	0	0
ROCK2 (5 of 11)	ENSDART00000128578 ROCK2 (5 of 11) Zv9_NA481:11944-15920 (-)	Zv9_NA481:11944-15920	-	0	None associated with 3' UTR	0	0	0
BSPRY (7 of 9)	ENSDART00000123949 BSPRY (7 of 9) Zv9_NA482:8432-10719 (+)	Zv9_NA482:8432-10719	+	0	No 3P tags	-	0	0
LCP1	ENSDART00000129608 LCP1 Zv9_NA484:21676-28406 (+)	Zv9_NA484:21676-28406	+	0	No 3P tags	-	0	0
FAM131A	ENSDART00000108960 FAM131A Zv9_NA490:6729-20370 (-)	Zv9_NA490:6729-20370	-	1	Annotated and revised	2	520	520	Zv9_NA490:6729-7249	Known 3'UTR	43	1	6729	43	Novel 3'UTR (Shortened)	6	1	6922	6
ME1 (2 of 2)	ENSDART00000110493 ME1 (2 of 2) Zv9_NA491:21742-38113 (+)	Zv9_NA491:21742-38113	+	0	Only revised	1	0	166	Zv9_NA491:37688-37854	Novel 3'UTR (Alternative last exon)	51	1	37854	51
MCHR2 (1 of 2)	NM_001003037 MCHR2 Zv9_NA491:43985-58438 (+), ENSDART00000130885 MCHR2 (1 of 2) Zv9_NA491:43859-58507 (+)	Zv9_NA491:43859-58507	+	0	None associated with 3' UTR	0	0	0
CABZ01083607.2	ENSDART00000125568 CABZ01083607.2 Zv9_NA492:26624-27512 (+)	Zv9_NA492:26624-27512	+	0	No 3P tags	-	0	0
CABZ01083607.1	ENSDART00000127178 CABZ01083607.1 Zv9_NA492:168-45066 (-)	Zv9_NA492:168-45066	-	0	None associated with 3' UTR	0	0	0
BCAM (2 of 2)	ENSDART00000127731 BCAM (2 of 2) Zv9_NA493:32168-40369 (-)	Zv9_NA493:32168-40369	-	0	No 3P tags	-	0	0
CABZ01111936.2	ENSDART00000125542 CABZ01111936.2 Zv9_NA495:8045-9278 (-)	Zv9_NA495:8045-9278	-	0	No 3P tags	-	0	0
CABZ01111936.1	ENSDART00000124654 CABZ01111936.1 Zv9_NA495:10350-10897 (-)	Zv9_NA495:10350-10897	-	0	No 3P tags	-	0	0
CABZ01111935.1	ENSDART00000121609 CABZ01111935.1 Zv9_NA495:1175-7181 (+)	Zv9_NA495:1148-7181	+	0	No 3P tags	-	0	0
PDZRN4 (2 of 2)	ENSDART00000129735 PDZRN4 (2 of 2) Zv9_NA498:3524-4533 (+)	Zv9_NA498:3524-4577	+	1	Only extended	2	15	2722	Zv9_NA498:4533-7255	Novel 3'UTR (Extended)	248	2	4773	8	7255	240
CABZ01030016.1	ENSDART00000109175 CABZ01030016.1 Zv9_NA502:9923-18745 (-)	Zv9_NA502:9923-18745	-	0	No 3P tags	-	0	0
GPC5	ENSDART00000125684 GPC5 Zv9_NA503:37226-160006 (-)	Zv9_NA503:37226-160111	-	0	None associated with 3' UTR	0	0	0
CABZ01002349.1	ENSDART00000097512 CABZ01002349.1 Zv9_NA506:1653-10845 (+)	Zv9_NA506:1653-10845	+	0	No 3P tags	-	0	0
hs3st1l1	NM_001076122 HS3ST1 Zv9_NA509:45561-46254 (+), ENSDART00000127412 hs3st1l1 Zv9_NA509:45327-46447 (+)	Zv9_NA509:45327-46447	+	1	None associated with 3' UTR	0	100	0
CABZ01019476.1	NM_001110090 ZNF133 Zv9_NA51:19262-19808 (+), NM_001160590 zg57 Zv9_NA51:34808-35207 (+), NM_001171537 znf665 Zv9_NA51:19250-35686 (+), ENSDART00000128709 CABZ01019476.1 Zv9_NA51:35482-36223 (+)	Zv9_NA51:19250-36223	+	1	No 3P tags	-	30	30
CABZ01009725.1	ENSDART00000121423 CABZ01009725.1 Zv9_NA510:4046-15172 (-)	Zv9_NA510:4046-15172	-	0	No 3P tags	-	0	0
CABZ01011444.1	ENSDART00000112303 CABZ01011444.1 Zv9_NA513:11959-17352 (-)	Zv9_NA513:11959-17352	-	0	No 3P tags	-	0	0
CABZ01011447.1	NM_001135614 ZNF24 Zv9_NA513:21836-22058 (-), ENSDART00000129771 CABZ01011447.1 Zv9_NA513:21515-31537 (-)	Zv9_NA513:21515-31537	-	0	No 3P tags	-	0	0
CABZ01050270.1	ENSDART00000130724 CABZ01050270.1 Zv9_NA514:6828-12498 (+)	Zv9_NA514:6828-12498	+	0	No 3P tags	-	0	0
FAM20A (2 of 2)	ENSDART00000113369 FAM20A (2 of 2) Zv9_NA523:6585-8451 (-)	Zv9_NA523:6585-8451	-	0	Only extended	2	0	407	Zv9_NA523:6178-6585	Novel 3'UTR (Extended)	21	2	6159	9	6178	12
SMOC2 (2 of 2)	ENSDART00000077021 SMOC2 (2 of 2) Zv9_NA529:4399-19731 (+)	Zv9_NA529:4399-19731	+	0	No 3P tags	-	0	0
CABZ01067080.1	ENSDART00000092388 CABZ01067080.1 Zv9_NA532:2326-5564 (-)	Zv9_NA532:2326-5564	-	0	None associated with 3' UTR	0	0	0
CABZ01117349.1	ENSDART00000085358 CABZ01117349.1 Zv9_NA534:9485-23414 (-)	Zv9_NA534:9485-23414	-	0	Only extended	4	0	750	Zv9_NA534:8735-9485	Novel 3'UTR (Extended)	679	4	8725	4	8735	631	9230	31	9240	13
ACTN4	ENSDART00000032887 ACTN4 Zv9_NA540:741-19399 (-)	Zv9_NA540:739-19864	-	0	No 3P tags	-	0	0
ZACN (1 of 2)	ENSDART00000122264 ZACN (1 of 2) Zv9_NA542:18367-33152 (-)	Zv9_NA542:18367-33152	-	0	None associated with 3' UTR	0	0	0
LACTB2	ENSDART00000011776 LACTB2 Zv9_NA544:6599-7266 (+)	Zv9_NA544:6596-7266	+	0	No 3P tags	-	0	0
KCNQ4	ENSDART00000125605 KCNQ4 Zv9_NA546:9519-23017 (+)	Zv9_NA546:9519-23017	+	0	No 3P tags	-	0	0
CABZ01020188.2	ENSDART00000130220 CABZ01020188.2 Zv9_NA548:23528-28853 (-)	Zv9_NA548:23528-28853	-	0	Only extended	1	0	120	Zv9_NA548:23408-23528	Novel 3'UTR (Extended)	17	1	23408	17
CABZ01020188.1	NM_001160067 nAChRa6 Zv9_NA548:4764-13371 (+), ENSDART00000047811 CABZ01020188.1 Zv9_NA548:4743-22461 (+)	Zv9_NA548:4743-22461	+	0	Only extended	1	0	803	Zv9_NA548:22461-23264	Novel 3'UTR (Extended)	16	1	23264	16
CABZ01067020.1	ENSDART00000114717 CABZ01067020.1 Zv9_NA55:14864-19965 (+)	Zv9_NA55:14864-19965	+	0	No 3P tags	-	0	0
SNX1 (2 of 2)	ENSDART00000104763 SNX1 (2 of 2) Zv9_NA550:806-13880 (-)	Zv9_NA550:806-13880	-	0	No 3P tags	-	0	0
CABZ01073388.1	ENSDART00000127111 CABZ01073388.1 Zv9_NA551:7719-20743 (+)	Zv9_NA551:7719-20743	+	1	Only annotated	1	302	302	Zv9_NA551:20441-20743	Known 3'UTR	445	1	20743	445
CABZ01073390.1	ENSDART00000084795 CABZ01073390.1 Zv9_NA551:41603-42103 (+)	Zv9_NA551:41603-42103	+	0	No 3P tags	-	0	0
CABZ01073389.1	ENSDART00000084798 CABZ01073389.1 Zv9_NA551:27557-29779 (+)	Zv9_NA551:27557-29779	+	0	No 3P tags	-	0	0
CABZ01064771.1	ENSDART00000122565 CABZ01064771.1 Zv9_NA553:6083-7203 (-)	Zv9_NA553:6083-7203	-	0	None associated with 3' UTR	0	0	0
GABRB2 (2 of 2)	ENSDART00000020215 GABRB2 (2 of 2) Zv9_NA555:323-136087 (-)	Zv9_NA555:323-136087	-	0	None associated with 3' UTR	0	0	0
MPHOSPH9	ENSDART00000114418 MPHOSPH9 Zv9_NA556:31-3897 (+)	Zv9_NA556:31-3897	+	0	None associated with 3' UTR	0	0	0
CABZ01066716.1	ENSDART00000128836 CABZ01066716.1 Zv9_NA559:5854-7391 (+)	Zv9_NA559:5854-7391	+	0	No 3P tags	-	0	0
eif2ak4	NM_001177806 Eif2ak4 Zv9_NA561:6343-91248 (-), ENSDART00000112556 eif2ak4 Zv9_NA561:49489-81585 (-)	Zv9_NA561:6343-91248	-	0	No 3P tags	-	0	0
TACO1 (2 of 2)	ENSDART00000125001 TACO1 (2 of 2) Zv9_NA562:3217-12827 (+)	Zv9_NA562:3217-12827	+	1	Only annotated	1	191	197	Zv9_NA562:12636-12833	Known 3'UTR	406	1	12833	406
FKBP15 (1 of 4)	ENSDART00000083441 FKBP15 (1 of 4) Zv9_NA565:100-6488 (-)	Zv9_NA565:100-6488	-	0	No 3P tags	-	0	0
CABZ01026370.1	ENSDART00000130914 CABZ01026370.1 Zv9_NA566:7720-9892 (-)	Zv9_NA566:7720-9892	-	2	Only annotated	1	647	647	Zv9_NA566:7720-8367	Known 3'UTR	180	1	7720	180
cdk11b	ENSDART00000083701 cdk11b Zv9_NA566:197-6332 (+)	Zv9_NA566:188-6333	+	1	Only extended	2	1	539	Zv9_NA566:6332-6878	Novel 3'UTR (Extended)	1585	2	6652	539	6878	1046
SIPA1L2 (1 of 3)	ENSDART00000124553 SIPA1L2 (1 of 3) Zv9_NA573:2190-46814 (+)	Zv9_NA573:2190-46814	+	0	No 3P tags	-	0	0
CABZ01080142.1	NM_001106054 Klhl1 Zv9_NA577:5858-10498 (+), ENSDART00000127300 CABZ01080142.1 Zv9_NA577:5906-10498 (+)	Zv9_NA577:5858-10498	+	1	No 3P tags	-	392	392
CABZ01000592.1	ENSDART00000129706 CABZ01000592.1 Zv9_NA578:10409-15270 (-)	Zv9_NA578:10409-15270	-	0	No 3P tags	-	0	0
USP30 (3 of 3)	ENSDART00000129552 USP30 (3 of 3) Zv9_NA579:4056-9007 (+)	Zv9_NA579:4056-9007	+	0	No 3P tags	-	0	0
USP30 (2 of 3)	NM_001097946 usp30 Zv9_NA579:1605-3872 (+), ENSDART00000124394 USP30 (2 of 3) Zv9_NA579:978-3724 (+)	Zv9_NA579:978-3872	+	0	No 3P tags	-	0	0
POLR3D	ENSDART00000006960 POLR3D Zv9_NA583:4505-16419 (-)	Zv9_NA583:4505-16419	-	1	Only annotated	1	222	222	Zv9_NA583:4505-4727	Known 3'UTR	709	1	4505	709
CABZ01089974.1	ENSDART00000123791 CABZ01089974.1 Zv9_NA584:99-7320 (-), NM_112681 XPL1 Zv9_NA584:180-4162 (-)	Zv9_NA584:99-7320	-	0	No 3P tags	-	0	0
CABZ01073099.1	ENSDART00000124620 CABZ01073099.1 Zv9_NA585:319-3425 (-)	Zv9_NA585:319-3425	-	0	No 3P tags	-	0	0
tlr8a	ENSDART00000110194 tlr8a Zv9_NA586:7877-13442 (-)	Zv9_NA586:7865-13442	-	0	No 3P tags	-	0	0
CABZ01038979.1	ENSDART00000123060 CABZ01038979.1 Zv9_NA592:16020-21360 (+)	Zv9_NA592:16020-21360	+	0	No 3P tags	-	0	0
WNK1	ENSDART00000123663 WNK1 Zv9_NA593:1431-11789 (-)	Zv9_NA593:1431-11789	-	0	No 3P tags	-	0	0
CABZ01059923.1	ENSDART00000057172 CABZ01059923.1 Zv9_NA596:5223-6587 (-)	Zv9_NA596:5223-6587	-	0	Annotated and revised	2	0	123	Zv9_NA596:5171-5223	Known 3'UTR	40	1	5171	40	Novel 3'UTR (Extended)	26	1	5100	26
ROCK2 (4 of 11)	ENSDART00000127582 ROCK2 (4 of 11) Zv9_NA598:8348-8660 (+)	Zv9_NA598:8348-8660	+	0	No 3P tags	-	0	0
DYX1C1 (1 of 2)	ENSDART00000124585 DYX1C1 (1 of 2) Zv9_NA603:3915-14633 (-), ENSDART00000126341 DYX1C1 (1 of 2) Zv9_NA603:3915-14633 (-)	Zv9_NA603:3915-14633	-	0	Annotated and revised	3	0	3512	Zv9_NA603:403-3915	Known 3'UTR	93	2	3883	8	3893	85	Novel 3'UTR (Extended)	1340	1	403	1340
LRG1 (2 of 3)	ENSDART00000130214 LRG1 (2 of 3) Zv9_NA605:17435-19401 (-)	Zv9_NA605:17435-19401	-	0	None associated with 3' UTR	0	0	0
ROCK2 (10 of 11)	NM_127606 T13C7.6; T13C7_6 Zv9_NA605:5542-15547 (-), ENSDART00000123708 ROCK2 (10 of 11) Zv9_NA605:2906-5657 (-)	Zv9_NA605:2906-15547	-	0	No 3P tags	-	0	0
CABZ01068324.1	ENSDART00000034192 CABZ01068324.1 Zv9_NA605:27036-28267 (-)	Zv9_NA605:27036-28267	-	0	None associated with 3' UTR	0	0	0
LONP2 (1 of 2)	ENSDART00000124021 LONP2 (1 of 2) Zv9_NA607:834-8184 (-)	Zv9_NA607:834-8205	-	0	No 3P tags	-	0	0
CABZ01035080.1	ENSDART00000129246 CABZ01035080.1 Zv9_NA609:897-53002 (-)	Zv9_NA609:897-53002	-	0	No 3P tags	-	0	0
TTC39A (2 of 2)	ENSDART00000128403 TTC39A (2 of 2) Zv9_NA610:1039-5027 (-)	Zv9_NA610:1037-7150	-	0	No 3P tags	-	0	0
CABZ01026065.1	ENSDART00000125177 CABZ01026065.1 Zv9_NA618:24090-25188 (+)	Zv9_NA618:24090-25188	+	0	No 3P tags	-	0	0
CABZ01031998.1	ENSDART00000111264 CABZ01031998.1 Zv9_NA619:1-4947 (-)	Zv9_NA619:1-4947	-	0	No 3P tags	-	0	0
CABZ01086952.1	ENSDART00000082957 CABZ01086952.1 Zv9_NA620:5723-18042 (+), NM_001085826 znf568 Zv9_NA620:16614-17337 (+)	Zv9_NA620:5723-18042	+	0	None associated with 3' UTR	0	0	0
CABZ01072735.1	ENSDART00000130189 CABZ01072735.1 Zv9_NA625:17616-31182 (-), NM_001093694 rp1 Zv9_NA625:22146-31625 (-)	Zv9_NA625:17616-31625	-	1	None associated with 3' UTR	0	117	0
CABZ01088718.1	ENSDART00000130727 CABZ01088718.1 Zv9_NA628:53599-54424 (+)	Zv9_NA628:53599-54424	+	0	No 3P tags	-	0	0
CABZ01075191.1	ENSDART00000058053 CABZ01075191.1 Zv9_NA629:6468-20118 (-), NM_173480 ZNF57 Zv9_NA629:6626-19860 (-)	Zv9_NA629:6468-20118	-	0	None associated with 3' UTR	0	0	0
SSTR3 (2 of 2)	NM_009218 Sstr3 Zv9_NA631:3563-4427 (+), ENSDART00000109802 SSTR3 (2 of 2) Zv9_NA631:3422-4697 (+)	Zv9_NA631:3422-4697	+	0	None associated with 3' UTR	0	0	0
CUTA	ENSDART00000111175 CUTA Zv9_NA631:7695-10841 (-)	Zv9_NA631:7695-13262	-	0	Only extended	2	0	127	Zv9_NA631:7568-7695	Novel 3'UTR (Extended)	3063	2	7568	3057	7578	6
CABZ01082817.1	ENSDART00000130244 CABZ01082817.1 Zv9_NA633:9719-14365 (+)	Zv9_NA633:9719-14365	+	0	No 3P tags	-	0	0
CABZ01068060.1	ENSDART00000098235 CABZ01068060.1 Zv9_NA637:914-4194 (+)	Zv9_NA637:914-4194	+	0	None associated with 3' UTR	0	0	0
GPR98 (1 of 2)	ENSDART00000129005 GPR98 (1 of 2) Zv9_NA651:5340-9278 (+)	Zv9_NA651:5340-9278	+	0	No 3P tags	-	0	0
CABZ01061749.1	ENSDART00000021208 CABZ01061749.1 Zv9_NA654:4982-114445 (-)	Zv9_NA654:4958-114446	-	1	Only extended	2	24	1099	Zv9_NA654:3883-4982	Novel 3'UTR (Extended)	415	2	3883	411	4132	4
MLLT4 (2 of 2)	ENSDART00000129368 MLLT4 (2 of 2) Zv9_NA655:1912-4974 (-)	Zv9_NA655:1912-4974	-	0	No 3P tags	-	0	0
h1m	ENSDART00000059041 h1m Zv9_NA660:14112-19625 (-)	Zv9_NA660:14112-19625	-	1	Annotated and revised	14	505	487	Zv9_NA660:14527-14617	Known 3'UTR	10	1	14144	10	Novel 3'UTR (Extended)	5	1	12942	5	Novel 3'UTR (Shortened)	5070	12	14279	92	14297	20	14333	23	14353	25	14391	30	14446	37	14460	59	14485	35	14500	21	14510	1367	14527	3341	14537	20
RSBN1	ENSDART00000111538 RSBN1 Zv9_NA661:2258-12479 (+), NM_001206227 RSBN1 Zv9_NA661:4582-12422 (+)	Zv9_NA661:2258-12479	+	0	None associated with 3' UTR	0	0	0
CABZ01092925.1	ENSDART00000128983 CABZ01092925.1 Zv9_NA663:19521-37627 (+)	Zv9_NA663:19521-37627	+	0	No 3P tags	-	0	0
CABZ01056802.1	ENSDART00000124466 CABZ01056802.1 Zv9_NA667:2524-14238 (-)	Zv9_NA667:2524-14238	-	0	None associated with 3' UTR	0	0	0
KCNT1 (1 of 2)	ENSDART00000109046 KCNT1 (1 of 2) Zv9_NA672:878-67977 (-), NM_001170513 kcnt2 Zv9_NA672:1352-67968 (-)	Zv9_NA672:878-67977	-	0	None associated with 3' UTR	0	0	0
CABZ01045755.1	ENSDART00000122013 CABZ01045755.1 Zv9_NA673:289-8349 (-)	Zv9_NA673:289-8349	-	0	No 3P tags	-	0	0
SLITRK1	ENSDART00000112983 SLITRK1 Zv9_NA675:160914-162978 (-)	Zv9_NA675:160914-162984	-	0	Only extended	2	0	465	Zv9_NA675:160449-160914	Novel 3'UTR (Extended)	38	2	160449	29	160470	9
CABZ01040253.1	ENSDART00000103264 CABZ01040253.1 Zv9_NA676:3671-18098 (-)	Zv9_NA676:3671-18098	-	0	None associated with 3' UTR	0	0	0
CABZ01049625.1	ENSDART00000126055 CABZ01049625.1 Zv9_NA678:39483-48477 (-), ENSDART00000130668 CABZ01049625.1 Zv9_NA678:39483-48477 (-)	Zv9_NA678:39483-48477	-	0	No 3P tags	-	0	0
CABZ01033874.1	ENSDART00000112272 CABZ01033874.1 Zv9_NA681:92115-96589 (-), ENSDART00000123184 CABZ01033874.1 Zv9_NA681:92339-92813 (-)	Zv9_NA681:92115-96589	-	0	No 3P tags	-	0	0
USP15	ENSDART00000122830 USP15 Zv9_NA683:15448-28844 (+)	Zv9_NA683:15448-28844	+	0	Only extended	2	0	1076	Zv9_NA683:28844-29771	Novel 3'UTR (Extended)	1503	2	29771	1493	29920	10
KDM5A	NM_001113458 KDM5D Zv9_NA683:835-7591 (+), ENSDART00000088367 KDM5A Zv9_NA683:561-13111 (+)	Zv9_NA683:561-13111	+	0	Only extended	5	0	424	Zv9_NA683:13111-13535	Novel 3'UTR (Extended)	887	5	13268	34	13281	5	13321	22	13535	736	13555	90
NLRX1 (35 of 41)	ENSDART00000110576 NLRX1 (35 of 41) Zv9_NA683:40156-119442 (+), ENSDART00000126120 NLRX1 (35 of 41) Zv9_NA683:56199-87449 (+)	Zv9_NA683:40156-119442	+	1	Annotated and revised	3	2720	2720		Known 3'UTR	20	1	87449	20	Novel 3'UTR (Extended)	18	1	120518	18	Novel 3'UTR (Shortened)	6	1	86755	6
CABZ01081375.1	ENSDART00000122767 CABZ01081375.1 Zv9_NA684:22-4085 (-)	Zv9_NA684:22-4085	-	0	No 3P tags	-	0	0
CABZ01099847.1	ENSDART00000064835 CABZ01099847.1 Zv9_NA686:4115-14594 (-)	Zv9_NA686:4115-14594	-	0	No 3P tags	-	0	0
CABZ01068023.1	ENSDART00000129121 CABZ01068023.1 Zv9_NA688:751-11728 (+)	Zv9_NA688:751-11728	+	0	No 3P tags	-	0	0
plcb4	ENSDART00000053894 plcb4 Zv9_NA689:29385-35573 (+)	Zv9_NA689:29385-35573	+	0	No 3P tags	-	0	0
PLCB4	ENSDART00000122791 PLCB4 Zv9_NA689:4615-12010 (+), NM_001014720 norpA Zv9_NA689:4543-27624 (+)	Zv9_NA689:4543-27624	+	0	No 3P tags	-	0	0
DSP (3 of 3)	ENSDART00000127861 DSP (3 of 3) Zv9_NA692:492-20504 (-)	Zv9_NA692:492-20504	-	0	No 3P tags	-	0	0
BICD2 (1 of 2)	ENSDART00000113908 BICD2 (1 of 2) Zv9_NA698:64309-88558 (-), NM_001033674 Bicd2 Zv9_NA698:64449-88555 (-)	Zv9_NA698:64309-88558	-	0	Only extended	2	0	2029	Zv9_NA698:56771-64449	Novel 3'UTR (Extended)	35	2	56771	27	64008	8
dcp1a	ENSDART00000017567 dcp1a Zv9_NA698:37277-48796 (-), NM_001191831 Dcp1a Zv9_NA698:39297-48771 (-)	Zv9_NA698:37277-48796	-	1	Annotated and revised	3	1627	1725	Zv9_NA698:37277-38904	Known 3'UTR	1654	2	37179	11	37277	1643	Novel 3'UTR (Shortened)	25	1	37632	25
CABZ01075021.1	NM_001124328 cacna1d Zv9_NA698:839-28861 (-), ENSDART00000073924 CABZ01075021.1 Zv9_NA698:27837-30617 (-)	Zv9_NA698:839-30617	-	0	No 3P tags	-	0	0
ZNF251 (25 of 34)	ENSDART00000129370 ZNF251 (25 of 34) Zv9_NA70:24211-28988 (+)	Zv9_NA70:24211-28988	+	0	No 3P tags	-	0	0
CABZ01034089.1	ENSDART00000128109 CABZ01034089.1 Zv9_NA70:10464-19511 (-)	Zv9_NA70:10464-19511	-	0	No 3P tags	-	0	0
CABZ01002470.1	ENSDART00000078614 CABZ01002470.1 Zv9_NA704:32512-36280 (+)	Zv9_NA704:32512-36280	+	0	No 3P tags	-	0	0
HADHB	NM_001086608 hadhb Zv9_NA706:3131-20807 (+), ENSDART00000079738 HADHB Zv9_NA706:2469-21134 (+)	Zv9_NA706:2469-21134	+	0	Annotated and revised	2	0	854	Zv9_NA706:21134-21661	Known 3'UTR	54	1	21218	54	Novel 3'UTR (Extended)	2684	1	21661	2684
CABZ01111729.1	ENSDART00000082068 CABZ01111729.1 Zv9_NA715:15625-20854 (-)	Zv9_NA715:15625-20854	-	1	Only annotated	2	903	903	Zv9_NA715:15625-16528	Known 3'UTR	108	2	15615	6	15625	102
CABZ01111623.1	ENSDART00000124408 CABZ01111623.1 Zv9_NA717:7536-18165 (+)	Zv9_NA717:7536-18165	+	0	No 3P tags	-	0	0
FCGBP	ENSDART00000111258 FCGBP Zv9_NA719:296-19158 (+)	Zv9_NA719:296-19158	+	0	No 3P tags	-	0	0
ZNF660 (6 of 8)	ENSDART00000127893 ZNF660 (6 of 8) Zv9_NA723:12063-17794 (+)	Zv9_NA723:12063-17794	+	0	No 3P tags	-	0	0
FBXO2	ENSDART00000103153 FBXO2 Zv9_NA732:107870-114031 (+)	Zv9_NA732:107870-114031	+	1	Annotated and revised	8	447	447	Zv9_NA732:113584-113782	Known 3'UTR	1648	5	113976	166	113987	97	113998	48	114018	14	114031	1323	Novel 3'UTR (Shortened)	2544	3	113739	81	113765	518	113782	1945
PHF13	ENSDART00000114111 PHF13 Zv9_NA732:87586-96593 (-)	Zv9_NA732:87577-96593	-	1	Only extended	4	9	3690	Zv9_NA732:83896-87586	Novel 3'UTR (Extended)	59	4	83896	35	83967	5	86871	8	87385	11
DNAJC11 (2 of 2)	NM_001079115 dnajc11 Zv9_NA732:59980-76426 (+), ENSDART00000124366 DNAJC11 (2 of 2) Zv9_NA732:59974-77657 (+)	Zv9_NA732:59974-77657	+	0	Only extended	1	0	869	Zv9_NA732:77657-78499	Novel 3'UTR (Extended)	7	1	78499	7
CCDC23	ENSDART00000125786 CCDC23 Zv9_NA732:124928-125998 (-)	Zv9_NA732:124928-125998	-	2	Annotated and revised	4	589	985	Zv9_NA732:124928-125517	Known 3'UTR	134	1	124928	134	Novel 3'UTR (Extended)	24	1	124438	24	Novel 3'UTR (Shortened)	35	2	125211	28	125272	7
CABZ01064968.3	ENSDART00000123566 CABZ01064968.3 Zv9_NA735:32967-39368 (+)	Zv9_NA735:32967-39368	+	0	None associated with 3' UTR	0	0	0
MYO9B (2 of 3)	ENSDART00000112478 MYO9B (2 of 3) Zv9_NA735:120608-170862 (-), NM_001130065 MYO9B Zv9_NA735:122742-170862 (-)	Zv9_NA735:120608-170862	-	1	Annotated and revised	2	3	237	Zv9_NA735:120564-120608	Known 3'UTR	99	1	120564	99	Novel 3'UTR (Extended)	14	1	120371	14
CABZ01064968.2	ENSDART00000121896 CABZ01064968.2 Zv9_NA735:21210-29918 (+)	Zv9_NA735:21210-29918	+	0	Only extended	1	0	489	Zv9_NA735:29918-30407	Novel 3'UTR (Extended)	17	1	30407	17
CABZ01064972.2	ENSDART00000106119 CABZ01064972.2 Zv9_NA735:46961-57379 (+)	Zv9_NA735:46961-57379	+	0	No 3P tags	-	0	0
CABZ01064973.1	ENSDART00000127160 CABZ01064973.1 Zv9_NA735:109495-119564 (+)	Zv9_NA735:109495-119564	+	1	Only Novel 3'UTR (Shortened)	1	1823	125	Zv9_NA735:117741-117866	Novel 3'UTR (Shortened)	33	1	117866	33
CABZ01064973.2	ENSDART00000125464 CABZ01064973.2 Zv9_NA735:96543-97323 (-)	Zv9_NA735:96543-97323	-	0	Only extended	1	0	206	Zv9_NA735:96337-96543	Novel 3'UTR (Extended)	13	1	96337	13
CABZ01064972.1	ENSDART00000103889 CABZ01064972.1 Zv9_NA735:71525-72362 (-)	Zv9_NA735:71525-72362	-	0	Only extended	1	0	128	Zv9_NA735:71397-71525	Novel 3'UTR (Extended)	281	1	71397	281
CABZ01064968.1	ENSDART00000128033 CABZ01064968.1 Zv9_NA735:6766-9886 (+), ENSDART00000092422 CABZ01064968.1 Zv9_NA735:6664-9711 (+)	Zv9_NA735:6664-9886	+	0	No 3P tags	-	0	0
CABZ01021063.1	ENSDART00000003878 CABZ01021063.1 Zv9_NA736:3637-6199 (+)	Zv9_NA736:3637-6199	+	0	None associated with 3' UTR	0	0	0
CABZ01092804.1	ENSDART00000115201 CABZ01092804.1 Zv9_NA738:15732-16821 (-)	Zv9_NA738:15731-16822	-	1	None associated with 3' UTR	0	1	0
FKBP6 (1 of 2)	ENSDART00000129800 FKBP6 (1 of 2) Zv9_NA739:9880-12084 (-), NM_001102209 FKBP6 Zv9_NA739:11175-11881 (-)	Zv9_NA739:9880-12084	-	0	Only extended	1	0	178	Zv9_NA739:10997-11175	Novel 3'UTR (Extended)	13	1	10997	13
FBXO10 (2 of 2)	ENSDART00000130088 FBXO10 (2 of 2) Zv9_NA739:3642-6258 (-)	Zv9_NA739:3642-6258	-	0	No 3P tags	-	0	0
CABZ01055715.1	ENSDART00000130060 CABZ01055715.1 Zv9_NA740:711-1645 (-)	Zv9_NA740:711-1645	-	0	No 3P tags	-	0	0
CABZ01076758.1	ENSDART00000124940 CABZ01076758.1 Zv9_NA747:7990-15266 (-), NM_001006176 CORO7 Zv9_NA747:4452-14883 (-)	Zv9_NA747:4452-15266	-	0	Only extended	2	0	615	Zv9_NA747:4012-7990	Novel 3'UTR (Extended)	54	2	3951	9	4012	45
PRKD2 (2 of 2)	ENSDART00000121950 PRKD2 (2 of 2) Zv9_NA75:8830-13653 (+), NM_001013895 Prkd2 Zv9_NA75:2392-13557 (+)	Zv9_NA75:2392-13653	+	0	No 3P tags	-	0	0
ABCB11 (3 of 3)	ENSDART00000075636 ABCB11 (3 of 3) Zv9_NA756:13720-25344 (-)	Zv9_NA756:13720-25344	-	0	Only extended	1	0	350	Zv9_NA756:13370-13720	Novel 3'UTR (Extended)	7	1	13370	7
HEATR2 (1 of 2)	NM_001097038 heatr2 Zv9_NA758:744-12257 (+), ENSDART00000111988 HEATR2 (1 of 2) Zv9_NA758:735-4830 (+)	Zv9_NA758:735-12257	+	0	Only extended	1	0	110	Zv9_NA758:4830-4940	Novel 3'UTR (Extended)	9	1	4940	9
CABZ01081359.1	ENSDART00000111851 CABZ01081359.1 Zv9_NA759:8734-14921 (-)	Zv9_NA759:8734-14921	-	0	No 3P tags	-	0	0
FCHSD2	ENSDART00000121854 FCHSD2 Zv9_NA760:1164-19454 (+)	Zv9_NA760:1164-19454	+	0	No 3P tags	-	0	0
ADAMTS20	NM_001164785 Adamts20 Zv9_NA761:828-42180 (-), ENSDART00000110939 ADAMTS20 Zv9_NA761:265-42075 (-)	Zv9_NA761:265-42180	-	0	No 3P tags	-	0	0
CABZ01072815.1	ENSDART00000128111 CABZ01072815.1 Zv9_NA765:13760-28225 (+)	Zv9_NA765:13760-28225	+	0	No 3P tags	-	0	0
CABZ01114105.1	ENSDART00000110954 CABZ01114105.1 Zv9_NA767:7271-16339 (-)	Zv9_NA767:7271-16339	-	0	No 3P tags	-	0	0
DTX1	ENSDART00000091274 DTX1 Zv9_NA771:12735-43326 (+), NM_001088981 dtx1 Zv9_NA771:14228-42843 (+)	Zv9_NA771:12735-43326	+	0	None associated with 3' UTR	0	0	0
RASAL1 (1 of 2)	ENSDART00000130124 RASAL1 (1 of 2) Zv9_NA771:71374-99986 (-), NM_001008048 rasal1 Zv9_NA771:76472-100073 (-)	Zv9_NA771:71374-100073	-	0	None associated with 3' UTR	0	0	0
CABZ01080545.1	ENSDART00000057346 CABZ01080545.1 Zv9_NA774:475-22601 (+), NM_001026275 F33E2.7 Zv9_NA774:949-2162 (+)	Zv9_NA774:475-22601	+	0	Only extended	2	0	357	Zv9_NA774:22601-22958	Novel 3'UTR (Extended)	14	2	22946	4	22958	10
CABZ01080550.1	NM_023566 Muc2 Zv9_NA774:34046-53967 (+), ENSDART00000046576 CABZ01080550.1 Zv9_NA774:34004-55478 (+)	Zv9_NA774:34004-55478	+	0	No 3P tags	-	0	0
CABZ01087422.1	ENSDART00000129717 CABZ01087422.1 Zv9_NA776:5531-7721 (+)	Zv9_NA776:5531-7721	+	0	None associated with 3' UTR	0	0	0
CABZ01084877.1	ENSDART00000127146 CABZ01084877.1 Zv9_NA779:311-23840 (-)	Zv9_NA779:311-23840	-	0	No 3P tags	-	0	0
MDGA2 (3 of 3)	ENSDART00000122840 MDGA2 (3 of 3) Zv9_NA78:9452-18758 (+)	Zv9_NA78:9452-18758	+	0	Only extended	2	0	2235	Zv9_NA78:18758-19105	Novel 3'UTR (Extended)	10	2	19105	6	20993	4
CABZ01081333.1	ENSDART00000128559 CABZ01081333.1 Zv9_NA782:5481-14428 (-)	Zv9_NA782:5481-14428	-	0	No 3P tags	-	0	0
PPIC	NM_079049 cyp33 Zv9_NA783:19936-22368 (+), ENSDART00000055579 PPIC Zv9_NA783:18329-29516 (+)	Zv9_NA783:18329-29516	+	1	Annotated and revised	6	4402	4402	Zv9_NA783:25114-29516	Known 3'UTR	509	2	29516	504	29534	5	Novel 3'UTR (Shortened)	199	4	27472	8	27833	165	27884	7	28033	19
SHROOM3	ENSDART00000124854 SHROOM3 Zv9_NA784:1599-11645 (+)	Zv9_NA784:1599-11645	+	1	Annotated and revised	2	3131	3131	Zv9_NA784:8514-11645	Known 3'UTR	55	1	11645	55	Novel 3'UTR (Shortened)	4	1	8888	4
CABZ01112436.1	ENSDART00000126385 CABZ01112436.1 Zv9_NA786:407-22627 (+)	Zv9_NA786:407-22627	+	0	Only extended	1	0	447	Zv9_NA786:22627-23074	Novel 3'UTR (Extended)	7	1	23074	7
CABZ01070854.1	ENSDART00000126738 CABZ01070854.1 Zv9_NA787:91846-94610 (+)	Zv9_NA787:91846-94610	+	0	No 3P tags	-	0	0
CABZ01070852.2	ENSDART00000129746 CABZ01070852.2 Zv9_NA787:69923-78407 (+)	Zv9_NA787:69923-78407	+	0	No 3P tags	-	0	0
CABZ01070852.1	ENSDART00000128154 CABZ01070852.1 Zv9_NA787:47465-48052 (-)	Zv9_NA787:47465-48052	-	0	No 3P tags	-	0	0
zgc:158321	ENSDART00000093311 zgc:158321 Zv9_NA796:918-1912 (-)	Zv9_NA796:918-1912	-	0	None associated with 3' UTR	0	0	0
CABZ01067973.1	ENSDART00000067655 CABZ01067973.1 Zv9_NA797:32641-111749 (+)	Zv9_NA797:32635-111749	+	0	None associated with 3' UTR	0	0	0
CABZ01055017.1	ENSDART00000130236 CABZ01055017.1 Zv9_NA798:1167-8747 (-)	Zv9_NA798:1167-8747	-	0	No 3P tags	-	0	0
EIF4G1 (2 of 3)	ENSDART00000129126 EIF4G1 (2 of 3) Zv9_NA805:5412-17968 (-)	Zv9_NA805:5412-17968	-	1	None associated with 3' UTR	0	1660	0
im:7150988	ENSDART00000097417 im:7150988 Zv9_NA807:23458-25714 (+), NM_134824 CG16995 Zv9_NA807:25552-25663 (+)	Zv9_NA807:23458-25714	+	0	Annotated and revised	2	0	209	Zv9_NA807:25714-25872	Known 3'UTR	497	1	25809	497	Novel 3'UTR (Extended)	1588	1	25872	1588
CABZ01084942.1	NM_001204793 trhr3 Zv9_NA808:17993-21775 (+), ENSDART00000081490 CABZ01084942.1 Zv9_NA808:17798-23307 (+)	Zv9_NA808:17798-23307	+	1	Only annotated	1	1397	1398	Zv9_NA808:21910-23308	Known 3'UTR	90	1	23308	90
CLRN3	ENSDART00000122745 CLRN3 Zv9_NA81:22410-33451 (-), ENSDART00000129662 CLRN3 Zv9_NA81:22218-33451 (-)	Zv9_NA81:22218-33451	-	0	None associated with 3' UTR	0	0	0
CABZ01069268.1	ENSDART00000123930 CABZ01069268.1 Zv9_NA81:49910-51114 (+)	Zv9_NA81:49910-51114	+	0	No 3P tags	-	0	0
SEC14L1 (1 of 2)	ENSDART00000121420 SEC14L1 (1 of 2) Zv9_NA811:1141-29747 (+)	Zv9_NA811:1141-29747	+	0	Only annotated	1	0	77	Zv9_NA811:29747-29824	Known 3'UTR	8	1	29824	8
CABZ01073098.2	ENSDART00000128563 CABZ01073098.2 Zv9_NA816:9890-16922 (+)	Zv9_NA816:9890-16922	+	0	Only annotated	1	0	26	Zv9_NA816:16922-16948	Known 3'UTR	11	1	16948	11
ERMP1 (2 of 2)	ENSDART00000128899 ERMP1 (2 of 2) Zv9_NA820:1848-14173 (+)	Zv9_NA820:1848-14173	+	1	Annotated and revised	3	4939	4940	Zv9_NA820:9234-14174	Known 3'UTR	1010	1	14174	1010	Novel 3'UTR (Shortened)	31	2	9810	24	14018	7
TMEM90B	ENSDART00000110840 TMEM90B Zv9_NA824:42256-88030 (-)	Zv9_NA824:42256-88030	-	2	Annotated and revised	2	5425	5425	Zv9_NA824:42256-47681	Known 3'UTR	358	1	42256	358	Novel 3'UTR (Shortened)	5	1	46474	5
CST7	ENSDART00000122643 CST7 Zv9_NA824:101-3411 (-)	Zv9_NA824:101-3411	-	0	None associated with 3' UTR	0	0	0
CABZ01017723.1	ENSDART00000130756 CABZ01017723.1 Zv9_NA827:801-12077 (+)	Zv9_NA827:801-12077	+	0	No 3P tags	-	0	0
CABZ01017725.1	NM_001171537 znf665 Zv9_NA827:45741-46122 (-), ENSDART00000130123 CABZ01017725.1 Zv9_NA827:45057-55995 (-)	Zv9_NA827:45057-55995	-	0	None associated with 3' UTR	0	0	0
CABZ01017734.1	ENSDART00000123492 CABZ01017734.1 Zv9_NA828:19561-37586 (+)	Zv9_NA828:7752-37586	+	0	None associated with 3' UTR	0	0	0
CABZ01017733.1	ENSDART00000129064 CABZ01017733.1 Zv9_NA828:5048-9608 (-)	Zv9_NA828:5048-9608	-	0	Only extended	1	0	495	Zv9_NA828:4553-5048	Novel 3'UTR (Extended)	5	1	4553	5
RAP1GAP (2 of 3)	ENSDART00000122893 RAP1GAP (2 of 3) Zv9_NA830:4007-10235 (+), NM_001027019 F53A10.2 Zv9_NA830:4144-12683 (+)	Zv9_NA830:4007-12683	+	0	No 3P tags	-	0	0
CABZ01088737.1	ENSDART00000127096 CABZ01088737.1 Zv9_NA832:6986-8106 (-)	Zv9_NA832:6986-8106	-	0	None associated with 3' UTR	0	0	0
CABZ01113152.1	ENSDART00000129410 CABZ01113152.1 Zv9_NA834:19751-41261 (-)	Zv9_NA834:19751-41315	-	0	Only extended	1	0	501	Zv9_NA834:19250-19751	Novel 3'UTR (Extended)	5	1	19250	5
LRG1 (3 of 3)	ENSDART00000122537 LRG1 (3 of 3) Zv9_NA839:7267-10251 (+)	Zv9_NA839:7267-10251	+	0	Only extended	3	0	817	Zv9_NA839:10251-11068	Novel 3'UTR (Extended)	58	3	10720	8	11038	14	11068	36
CABZ01099929.1	ENSDART00000125517 CABZ01099929.1 Zv9_NA848:8525-23108 (+)	Zv9_NA848:8525-23108	+	0	None associated with 3' UTR	0	0	0
CABZ01081748.1	ENSDART00000124847 CABZ01081748.1 Zv9_NA851:16535-18966 (+), NM_001165276 zn271 Zv9_NA851:18372-18831 (+)	Zv9_NA851:16535-18966	+	0	Only extended	1	0	249	Zv9_NA851:18966-19080	Novel 3'UTR (Extended)	9	1	19080	9
CABZ01081749.1	ENSDART00000079956 CABZ01081749.1 Zv9_NA851:22340-30399 (-)	Zv9_NA851:22340-30399	-	1	Only annotated	1	2763	2763	Zv9_NA851:22340-25103	Known 3'UTR	726	1	22340	726
CABZ01081747.1	ENSDART00000113400 CABZ01081747.1 Zv9_NA851:699-1476 (-)	Zv9_NA851:699-1476	-	0	Only extended	2	0	466	Zv9_NA851:233-699	Novel 3'UTR (Extended)	39	2	217	4	233	35
CABZ01081747.2	ENSDART00000123337 CABZ01081747.2 Zv9_NA851:4802-10133 (-)	Zv9_NA851:4802-10133	-	0	Annotated and revised	4	0	76	Zv9_NA851:4726-4802	Known 3'UTR	30	2	4726	18	4761	12	Novel 3'UTR (Extended)	9	2	4685	5	4695	4
CABZ01081752.1	ENSDART00000123135 CABZ01081752.1 Zv9_NA851:37394-46666 (-)	Zv9_NA851:37394-46666	-	0	None associated with 3' UTR	0	0	0
KNDC1 (2 of 2)	ENSDART00000083839 KNDC1 (2 of 2) Zv9_NA856:27300-41615 (+), ENSDART00000129195 KNDC1 (2 of 2) Zv9_NA856:21015-41615 (+)	Zv9_NA856:21015-41615	+	0	Annotated and revised	2	0	128	Zv9_NA856:41615-41743	Known 3'UTR	4	1	41706	4	Novel 3'UTR (Extended)	50	1	41743	50
CASKIN2 (1 of 4)	ENSDART00000130451 CASKIN2 (1 of 4) Zv9_NA86:37899-77878 (+), NM_001136167 caskin2 Zv9_NA86:37926-77800 (+)	Zv9_NA86:37899-77878	+	0	No 3P tags	-	0	0
CABZ01072143.1	ENSDART00000121695 CABZ01072143.1 Zv9_NA866:223-11368 (-)	Zv9_NA866:223-11368	-	0	No 3P tags	-	0	0
CZv9_NA868H18orf45 (2 of 2)	ENSDART00000127134 CZv9_NA868H18orf45 (2 of 2) Zv9_NA868:3117-7794 (-)	Zv9_NA868:3117-7794	-	0	Only extended	2	0	143	Zv9_NA868:2974-3117	Novel 3'UTR (Extended)	51	2	2964	11	2974	40
CABZ01113582.1	ENSDART00000128553 CABZ01113582.1 Zv9_NA869:12545-15110 (+)	Zv9_NA869:12545-15110	+	0	No 3P tags	-	0	0
CABZ01072312.1	ENSDART00000127928 CABZ01072312.1 Zv9_NA872:7383-8773 (+), ENSDART00000125777 CABZ01072312.1 Zv9_NA872:7840-9056 (+)	Zv9_NA872:7383-9056	+	0	None associated with 3' UTR	0	0	0
GABPB1 (2 of 2)	ENSDART00000127749 GABPB1 (2 of 2) Zv9_NA873:3241-7541 (+), NM_002041 GABPB1 Zv9_NA873:3238-6713 (+)	Zv9_NA873:3238-7541	+	0	No 3P tags	-	0	0
CABZ01002768.1	ENSDART00000129000 CABZ01002768.1 Zv9_NA875:621-5773 (+), ENSDART00000130667 CABZ01002768.1 Zv9_NA875:621-5797 (+)	Zv9_NA875:621-5797	+	0	Only extended	1	0	872		Novel 3'UTR (Extended)	342	1	6645	342
zgc:174646	ENSDART00000130523 zgc:174646 Zv9_NA875:9289-10435 (-)	Zv9_NA875:9289-10435	-	0	Only extended	1	0	281	Zv9_NA875:9008-9289	Novel 3'UTR (Extended)	10	1	9008	10
CABZ01007829.1	ENSDART00000126482 CABZ01007829.1 Zv9_NA876:3712-7805 (+)	Zv9_NA876:3712-7805	+	0	No 3P tags	-	0	0
zgc:171695	ENSDART00000123551 zgc:171695 Zv9_NA876:29987-31113 (-), ENSDART00000125292 zgc:171695 Zv9_NA876:29099-30680 (-)	Zv9_NA876:29099-31113	-	0	None associated with 3' UTR	0	0	0
CZv9_NA879H1orf43 (1 of 2)	ENSDART00000129176 CZv9_NA879H1orf43 (1 of 2) Zv9_NA879:12875-21660 (+)	Zv9_NA879:12875-21660	+	0	No 3P tags	-	0	0
ntn4	ENSDART00000121986 ntn4 Zv9_NA880:4249-13867 (-), ENSDART00000130367 ntn4 Zv9_NA880:4249-13858 (-)	Zv9_NA880:4249-13867	-	0	None associated with 3' UTR	0	0	0
snrpf	ENSDART00000053129 snrpf Zv9_NA880:20079-23231 (+)	Zv9_NA880:19992-23231	+	1	Only annotated	1	166	166	Zv9_NA880:23065-23231	Known 3'UTR	40960	1	23231	40960
CABZ01022575.2	ENSDART00000122804 CABZ01022575.2 Zv9_NA881:2254-3256 (+)	Zv9_NA881:2254-3256	+	0	Only extended	4	0	569	Zv9_NA881:3256-3523	Novel 3'UTR (Extended)	997	4	3400	4	3457	133	3523	829	3825	31
ZGPAT (2 of 2)	ENSDART00000130971 ZGPAT (2 of 2) Zv9_NA881:6166-6859 (+)	Zv9_NA881:6166-6859	+	0	Only extended	1	0	205	Zv9_NA881:6859-7064	Novel 3'UTR (Extended)	4	1	7064	4
ptmab	ENSDART00000111160 ptmab Zv9_NA883:34776-37930 (-)	Zv9_NA883:34776-37930	-	1	Only annotated	2	607	615	Zv9_NA883:34768-35383	Known 3'UTR	47798	2	34768	44658	34780	3140
CASKIN2 (4 of 4)	ENSDART00000048631 CASKIN2 (4 of 4) Zv9_NA885:10804-15581 (+)	Zv9_NA885:10804-15581	+	0	No 3P tags	-	0	0
CABZ01038708.1	ENSDART00000124743 CABZ01038708.1 Zv9_NA885:24293-30205 (-)	Zv9_NA885:24012-30205	-	1	Only extended	1	18	122	Zv9_NA885:24171-24293	Novel 3'UTR (Extended)	299	1	24171	299
zgc:162999	ENSDART00000044386 zgc:162999 Zv9_NA887:24709-53849 (-)	Zv9_NA887:24709-53849	-	1	No 3P tags	-	160	160
CABZ01042513.2	ENSDART00000130484 CABZ01042513.2 Zv9_NA887:19071-20410 (+)	Zv9_NA887:19071-20410	+	0	No 3P tags	-	0	0
CABZ01042513.3	ENSDART00000112293 CABZ01042513.3 Zv9_NA887:15675-17132 (-)	Zv9_NA887:15675-17132	-	0	None associated with 3' UTR	0	0	0
CABZ01043311.1	ENSDART00000101499 CABZ01043311.1 Zv9_NA888:1162-4415 (+)	Zv9_NA888:1162-4415	+	1	None associated with 3' UTR	0	586	0
SNX2	ENSDART00000075387 SNX2 Zv9_NA89:53351-87221 (+)	Zv9_NA89:53351-87221	+	0	Only extended	3	0	306	Zv9_NA89:87221-87527	Novel 3'UTR (Extended)	2543	3	87326	8	87527	2510	87539	25
CABZ01080649.1	ENSDART00000115315 CABZ01080649.1 Zv9_NA89:1489-3253 (+)	Zv9_NA89:1489-3253	+	0	Only extended	1	0	185	Zv9_NA89:3253-3438	Novel 3'UTR (Extended)	6	1	3438	6
SNCAIP	ENSDART00000109721 SNCAIP Zv9_NA89:13917-31536 (+), NM_001098601 SNCAIP Zv9_NA89:13926-28407 (+)	Zv9_NA89:13917-31536	+	1	Only extended	4	232	10467	Zv9_NA89:31536-35032	Novel 3'UTR (Extended)	299	4	31748	7	31764	93	35032	159	35195	40
cyp1c1	ENSDART00000019953 cyp1c1 Zv9_NA892:103569-106640 (+)	Zv9_NA892:103569-106640	+	1	Only annotated	1	1254	1256	Zv9_NA892:105386-106642	Known 3'UTR	112	1	106642	112
CABZ01047284.1	ENSDART00000123133 CABZ01047284.1 Zv9_NA892:857-6828 (+)	Zv9_NA892:857-6828	+	0	Only extended	1	0	320	Zv9_NA892:6828-7148	Novel 3'UTR (Extended)	21	1	7148	21
CABZ01047286.1	ENSDART00000128861 CABZ01047286.1 Zv9_NA892:22569-27716 (+)	Zv9_NA892:22569-27716	+	0	None associated with 3' UTR	0	0	0
CWF19L2 (2 of 2)	ENSDART00000126098 CWF19L2 (2 of 2) Zv9_NA894:408-10830 (-)	Zv9_NA894:408-10842	-	0	No 3P tags	-	0	0
RIIAD1	ENSDART00000122076 RIIAD1 Zv9_NA896:3708-5873 (-), NM_001077049 RIIAD1 Zv9_NA896:5512-5726 (-)	Zv9_NA896:3708-5873	-	0	Annotated and revised	5	0	884	Zv9_NA896:5419-5512	Known 3'UTR	108	2	3668	4	5419	104	Novel 3'UTR (Extended)	84	3	2887	76	3031	4	3100	4
TFR2 (2 of 2)	ENSDART00000128022 TFR2 (2 of 2) Zv9_NA897:3600-11638 (-), ENSDART00000093150 TFR2 (2 of 2) Zv9_NA897:1068-11638 (-)	Zv9_NA897:1068-11638	-	0	No 3P tags	-	0	0
CABZ01054392.1	ENSDART00000125817 CABZ01054392.1 Zv9_NA899:40945-80274 (+)	Zv9_NA899:40945-80274	+	0	None associated with 3' UTR	0	0	0
CABZ01054391.1	ENSDART00000105198 CABZ01054391.1 Zv9_NA899:52039-62760 (-)	Zv9_NA899:52039-62760	-	0	No 3P tags	-	0	0
VPRBP	ENSDART00000126025 VPRBP Zv9_NA90:99-9559 (+)	Zv9_NA90:99-9559	+	1	Only extended	3	8	1076	Zv9_NA90:9559-10635	Novel 3'UTR (Extended)	798	3	10610	29	10621	6	10635	763
NUP85 (1 of 2)	ENSDART00000130033 NUP85 (1 of 2) Zv9_NA900:14970-22873 (-)	Zv9_NA900:14958-22873	-	1	Annotated and revised	3	12	184	Zv9_NA900:14786-14970	Known 3'UTR	53	2	14898	17	14918	36	Novel 3'UTR (Extended)	74	1	14786	74
CABZ01061146.1	ENSDART00000126893 CABZ01061146.1 Zv9_NA902:783-3198 (-)	Zv9_NA902:783-3198	-	0	Only extended	6	0	578	Zv9_NA902:205-783	Novel 3'UTR (Extended)	460	6	191	62	205	355	305	9	365	11	454	4	600	19
CABZ01061890.1	NM_001044071 Alpm Zv9_NA903:29388-39153 (-), ENSDART00000024841 CABZ01061890.1 Zv9_NA903:29241-50744 (-)	Zv9_NA903:29241-50744	-	0	Only extended	1	0	268	Zv9_NA903:29120-29241	Novel 3'UTR (Extended)	9	1	29120	9
ITIH4	ENSDART00000035094 ITIH4 Zv9_NA904:1309-8840 (+), NM_001001537 ITIH4 Zv9_NA904:1507-8597 (+)	Zv9_NA904:1309-8840	+	0	No 3P tags	-	0	0
CABZ01066511.1	ENSDART00000111427 CABZ01066511.1 Zv9_NA905:7187-13850 (-)	Zv9_NA905:7187-13850	-	0	No 3P tags	-	0	0
CABZ01066514.1	NM_001104847 xt-ii Zv9_NA905:53564-57421 (-), ENSDART00000130166 CABZ01066514.1 Zv9_NA905:53855-57427 (-)	Zv9_NA905:53564-57427	-	1	Only extended	3	3	1227	Zv9_NA905:53346-53567	Novel 3'UTR (Extended)	25	3	52628	5	53346	12	53358	8
CABZ01066717.1	ENSDART00000106433 CABZ01066717.1 Zv9_NA906:78144-82069 (+), ENSDART00000081778 CABZ01066717.1 Zv9_NA906:1521-78675 (+), ENSDART00000058720 CABZ01066717.1 Zv9_NA906:78144-79086 (+)	Zv9_NA906:1521-82069	+	0	Only extended	1	0	180		Novel 3'UTR (Extended)	4	1	79266	4
CABZ01066717.2	ENSDART00000106379 CABZ01066717.2 Zv9_NA906:14284-36610 (+)	Zv9_NA906:14284-36610	+	0	Only extended	1	0	183	Zv9_NA906:36610-36793	Novel 3'UTR (Extended)	58	1	36793	58
plxna1	ENSDART00000110838 plxna1 Zv9_NA907:14078-23041 (-)	Zv9_NA907:14078-23041	-	0	No 3P tags	-	0	0
CYYR1	ENSDART00000126923 CYYR1 Zv9_NA908:96331-104731 (+)	Zv9_NA908:96331-104731	+	0	Only extended	7	0	2234	Zv9_NA908:104731-107002	Novel 3'UTR (Extended)	991	7	104844	10	106378	21	106389	17	106510	11	106849	10	106978	44	107002	878
adamts1	NM_001192325 ADAMTS8 Zv9_NA908:51093-91845 (+), ENSDART00000060939 adamts1 Zv9_NA908:84739-93567 (+)	Zv9_NA908:51093-93567	+	1	Only annotated	2	969	969	Zv9_NA908:92598-93567	Known 3'UTR	616	2	93567	587	93577	29
APP (2 of 3)	ENSDART00000081472 APP (2 of 3) Zv9_NA908:108661-129357 (+)	Zv9_NA908:108661-129357	+	0	None associated with 3' UTR	0	0	0
CABZ01067743.1	ENSDART00000130653 CABZ01067743.1 Zv9_NA910:2271-7992 (-)	Zv9_NA910:2271-8643	-	0	Only extended	2	0	443	Zv9_NA910:1879-2271	Novel 3'UTR (Extended)	5334	2	1828	12	1879	5322
LEPROTL1	ENSDART00000122027 LEPROTL1 Zv9_NA911:12291-15403 (-)	Zv9_NA911:12291-15403	-	2	Annotated and revised	5	1897	1897	Zv9_NA911:12291-14188	Known 3'UTR	1555	2	12279	15	12291	1540	Novel 3'UTR (Shortened)	1424	3	13582	8	13905	94	13918	1322
CABZ01069239.1	ENSDART00000125196 CABZ01069239.1 Zv9_NA912:307-1837 (-), NM_001135772 LRP5L Zv9_NA912:623-1807 (-)	Zv9_NA912:307-1837	-	1	No 3P tags	-	191	191
NADK (1 of 2)	ENSDART00000111254 NADK (1 of 2) Zv9_NA913:1514-10866 (+)	Zv9_NA913:1514-10866	+	0	Only annotated	1	0	99	Zv9_NA913:10866-10965	Known 3'UTR	373	1	10965	373
WDR46 (1 of 2)	ENSDART00000023316 WDR46 (1 of 2) Zv9_NA913:22571-25087 (+)	Zv9_NA913:22571-25087	+	0	None associated with 3' UTR	0	0	0
YBEY (2 of 2)	ENSDART00000123462 YBEY (2 of 2) Zv9_NA914:2487-6263 (-), NM_001077120 YBEY Zv9_NA914:4852-6041 (-)	Zv9_NA914:2487-6263	-	1	Only annotated	1	117	117	Zv9_NA914:2487-2604	Known 3'UTR	1242	1	2487	1242
SLC37A3	ENSDART00000097192 SLC37A3 Zv9_NA915:25298-67538 (-), NM_032295 SLC37A3 Zv9_NA915:36034-60976 (-)	Zv9_NA915:25298-67538	-	0	Annotated and revised	6	0	697	Zv9_NA915:24601-25298	Known 3'UTR	127	1	25246	127	Novel 3'UTR (Extended)	1254	5	24591	167	24601	996	24621	67	24858	9	24963	15
zgc:171422	ENSDART00000113848 zgc:171422 Zv9_NA915:75115-94116 (-)	Zv9_NA915:75115-94116	-	1	Annotated and revised	4	2477	2478	Zv9_NA915:75114-77592	Known 3'UTR	288	2	75101	25	75114	263	Novel 3'UTR (Shortened)	47	2	75454	4	76922	43
tmem19	ENSDART00000051030 tmem19 Zv9_NA915:107377-114717 (-)	Zv9_NA915:107377-114717	-	0	Only extended	2	0	399	Zv9_NA915:106978-107377	Novel 3'UTR (Extended)	418	2	106978	409	107191	9
mkxb	ENSDART00000111884 mkxb Zv9_NA916:1685-9444 (-)	Zv9_NA916:1685-9444	-	0	No 3P tags	-	0	0
SLC35E2	NM_001192646 SLC35E2B Zv9_NA917:3959-13945 (-), ENSDART00000041466 SLC35E2 Zv9_NA917:3899-14023 (-)	Zv9_NA917:3899-14023	-	0	Only extended	4	0	1376	Zv9_NA917:2583-3899	Novel 3'UTR (Extended)	1001	4	2562	304	2583	682	2670	5	3181	10
CFI	ENSDART00000129111 CFI Zv9_NA918:18907-42259 (+), ENSDART00000053577 CFI Zv9_NA918:18907-42259 (+), ENSDART00000129892 CFI Zv9_NA918:14510-29550 (+)	Zv9_NA918:14510-42259	+	0	Only extended	2	0	155		Novel 3'UTR (Extended)	2140	2	42414	2112	42428	28
slc25a47b	ENSDART00000127752 slc25a47b Zv9_NA92:39901-44426 (+)	Zv9_NA92:39901-44426	+	0	No 3P tags	-	0	0
SLC25A29 (2 of 2)	NM_001039355 SLC25A29 Zv9_NA92:21055-29095 (-), ENSDART00000082061 SLC25A29 (2 of 2) Zv9_NA92:21002-29756 (-)	Zv9_NA92:21002-29756	-	0	None associated with 3' UTR	0	0	0
fancm	ENSDART00000052772 fancm Zv9_NA92:2601-17190 (+)	Zv9_NA92:2601-17190	+	0	No 3P tags	-	0	0
OLFML2A (2 of 2)	ENSDART00000078436 OLFML2A (2 of 2) Zv9_NA921:11159-67168 (-)	Zv9_NA921:11159-67168	-	1	Annotated and revised	4	4435	4435	Zv9_NA921:11159-15594	Known 3'UTR	390	2	11159	266	11216	124	Novel 3'UTR (Shortened)	95	2	15152	28	15358	67
CABZ01074397.1	ENSDART00000125026 CABZ01074397.1 Zv9_NA922:5205-18117 (+)	Zv9_NA922:5205-18117	+	0	No 3P tags	-	0	0
PDCL3	ENSDART00000109909 PDCL3 Zv9_NA923:2017-8368 (+), ENSDART00000020040 PDCL3 Zv9_NA923:2017-8368 (+)	Zv9_NA923:2017-8368	+	0	Only extended	10	0	1154	Zv9_NA923:8368-10030	Novel 3'UTR (Extended)	1096	10	8548	14	8690	6	8722	7	8750	6	8773	6	8813	5	9522	16	10030	846	10088	28	10128	162
nms	ENSDART00000111194 nms Zv9_NA923:12371-18613 (-)	Zv9_NA923:12371-18613	-	1	Only annotated	2	105	132	Zv9_NA923:12344-15518	Known 3'UTR	279	2	12332	131	12344	148
NEDD4 (2 of 2)	ENSDART00000126130 NEDD4 (2 of 2) Zv9_NA924:6296-11379 (+)	Zv9_NA924:6296-11379	+	0	No 3P tags	-	0	0
SPATS2 (1 of 2)	ENSDART00000098001 SPATS2 (1 of 2) Zv9_NA925:4421-5622 (+)	Zv9_NA925:4421-5622	+	0	No 3P tags	-	0	0
zgc:171497	ENSDART00000128708 zgc:171497 Zv9_NA926:7706-25586 (-)	Zv9_NA926:7706-25586	-	1	Annotated and revised	4	5014	5017	Zv9_NA926:10933-12720	Known 3'UTR	10	1	7703	10	Novel 3'UTR (Shortened)	41	3	10933	33	11152	4	11434	4
CABZ01079302.1	ENSDART00000126717 CABZ01079302.1 Zv9_NA926:33363-42325 (-)	Zv9_NA926:33363-42325	-	0	Only extended	2	0	498	Zv9_NA926:32865-33363	Novel 3'UTR (Extended)	20	2	32865	12	33260	8
CABZ01090219.1	ENSDART00000130193 CABZ01090219.1 Zv9_NA928:42567-48171 (+)	Zv9_NA928:42567-48171	+	0	No 3P tags	-	0	0
FAM116A (2 of 2)	ENSDART00000127961 FAM116A (2 of 2) Zv9_NA930:1265-20338 (+), NM_001012781 FAM116A Zv9_NA930:1277-12386 (+)	Zv9_NA930:1265-20338	+	1	Annotated and revised	5	7453	7453	Zv9_NA930:12885-20338	Known 3'UTR	579	1	20338	579	Novel 3'UTR (Shortened)	95	3	13428	7	14324	4	18462	84	Novel 3'UTR (Alternative last exon)	5	1	7748	5
DUPD1	ENSDART00000098580 DUPD1 Zv9_NA931:1607-2790 (-)	Zv9_NA931:1607-2790	-	0	No 3P tags	-	0	0
DUSP13 (3 of 3)	ENSDART00000128138 DUSP13 (3 of 3) Zv9_NA931:3543-4422 (-)	Zv9_NA931:3543-4422	-	0	Only extended	2	0	403	Zv9_NA931:3140-3543	Novel 3'UTR (Extended)	22	2	3140	16	3281	6
twsg1b	ENSDART00000059299 twsg1b Zv9_NA933:2062-3011 (+)	Zv9_NA933:2062-3011	+	0	No 3P tags	-	0	0
EGFR (1 of 4)	ENSDART00000124355 EGFR (1 of 4) Zv9_NA939:2075-4471 (+)	Zv9_NA939:2075-4471	+	0	No 3P tags	-	0	0
tmem85	ENSDART00000127257 tmem85 Zv9_NA940:15706-16220 (-)	Zv9_NA940:15703-16220	-	1	Only extended	1	3	195	Zv9_NA940:15511-15706	Novel 3'UTR (Extended)	1169	1	15511	1169
LPCAT4 (1 of 2)	ENSDART00000126553 LPCAT4 (1 of 2) Zv9_NA940:2059-9405 (-)	Zv9_NA940:2059-9405	-	0	None associated with 3' UTR	0	0	0
mfsd7	ENSDART00000129610 mfsd7 Zv9_NA941:932-1581 (+)	Zv9_NA941:932-1581	+	0	No 3P tags	-	0	0
SLC10A7	ENSDART00000023484 SLC10A7 Zv9_NA947:173811-188906 (+), NM_001031131 SLC10A7 Zv9_NA947:173820-188236 (+)	Zv9_NA947:173811-188906	+	1	Only annotated	3	446	446	Zv9_NA947:188460-188906	Known 3'UTR	832	3	188883	5	188894	17	188906	810
CABZ01117605.1	ENSDART00000123406 CABZ01117605.1 Zv9_NA947:195839-196307 (+)	Zv9_NA947:195839-196307	+	0	No 3P tags	-	0	0
CABZ01117603.1	ENSDART00000126306 CABZ01117603.1 Zv9_NA947:136421-141590 (-)	Zv9_NA947:136421-141590	-	0	Only extended	1	0	224	Zv9_NA947:136197-136421	Novel 3'UTR (Extended)	40	1	136197	40
E2F1	ENSDART00000109944 E2F1 Zv9_NA947:4605-23521 (-)	Zv9_NA947:4605-23521	-	0	Only extended	4	0	3135	Zv9_NA947:1470-4605	Novel 3'UTR (Extended)	585	4	1470	564	2108	9	2501	6	4113	6
ZNF341	ENSDART00000114834 ZNF341 Zv9_NA947:25988-56549 (+), NM_001047859 LOC296300 Zv9_NA947:26000-41036 (+)	Zv9_NA947:25988-56549	+	1	None associated with 3' UTR	0	184	0
ITCH (1 of 2)	NM_057405 Su(dx) Zv9_NA947:68777-93365 (-), ENSDART00000087334 ITCH (1 of 2) Zv9_NA947:72623-113371 (-)	Zv9_NA947:68777-113371	-	0	Only extended	1	0	498	Zv9_NA947:68279-68777	Novel 3'UTR (Extended)	21	1	68279	21
CABZ01118266.1	ENSDART00000122293 CABZ01118266.1 Zv9_NA948:2029-3903 (-)	Zv9_NA948:2029-3903	-	0	No 3P tags	-	0	0
CABZ01086639.3	ENSDART00000111459 CABZ01086639.3 Zv9_NA95:20190-21878 (+)	Zv9_NA95:20190-21878	+	0	None associated with 3' UTR	0	0	0
PGBD4 (6 of 7)	ENSDART00000108604 PGBD4 (6 of 7) Zv9_NA95:31652-38297 (-)	Zv9_NA95:31652-38297	-	0	Only extended	4	0	850	Zv9_NA95:31413-31652	Novel 3'UTR (Extended)	810	4	30802	4	31179	27	31413	704	31442	75
CABZ01086639.4	ENSDART00000127566 CABZ01086639.4 Zv9_NA95:44952-46068 (-)	Zv9_NA95:44952-46068	-	0	None associated with 3' UTR	0	0	0
CABZ01086642.1	ENSDART00000114794 CABZ01086642.1 Zv9_NA96:12256-13411 (-)	Zv9_NA96:12256-13411	-	0	Only extended	1	0	286	Zv9_NA96:11970-12256	Novel 3'UTR (Extended)	131	1	11970	131
gap43	ENSDART00000025036 gap43 Zv9_NA963:0-14235 (+)	Zv9_NA963:0-14235	+	1	Annotated and revised	3	370	482	Zv9_NA963:13865-14237	Known 3'UTR	1736	2	14202	6	14237	1730	Novel 3'UTR (Extended)	11	1	14347	11
LSAMP	ENSDART00000121937 LSAMP Zv9_NA963:18827-31648 (-)	Zv9_NA963:18827-31648	-	0	None associated with 3' UTR	0	0	0
CABZ01099890.1	ENSDART00000130254 CABZ01099890.1 Zv9_NA964:291-5178 (-)	Zv9_NA964:291-5178	-	0	No 3P tags	-	0	0
HTRA3 (2 of 2)	ENSDART00000074826 HTRA3 (2 of 2) Zv9_NA965:194-3458 (+)	Zv9_NA965:194-3458	+	0	Only extended	1	0	444	Zv9_NA965:3458-3902	Novel 3'UTR (Extended)	64	1	3902	64
TMEM117 (2 of 2)	ENSDART00000109106 TMEM117 (2 of 2) Zv9_NA966:1001-7302 (-)	Zv9_NA966:1001-7302	-	0	None associated with 3' UTR	0	0	0
TWF1 (2 of 3)	ENSDART00000128343 TWF1 (2 of 3) Zv9_NA966:8507-12269 (+)	Zv9_NA966:8507-12269	+	0	No 3P tags	-	0	0
KNDC1 (1 of 2)	ENSDART00000127770 KNDC1 (1 of 2) Zv9_NA97:20619-44236 (+)	Zv9_NA97:20619-44236	+	0	No 3P tags	-	0	0
SLC12A6	ENSDART00000113802 SLC12A6 Zv9_NA972:18550-24231 (-)	Zv9_NA972:18550-24231	-	1	Annotated and revised	3	1742	1742	Zv9_NA972:18550-20292	Known 3'UTR	1536	2	18533	120	18550	1416	Novel 3'UTR (Shortened)	4	1	18717	4
TOX4 (1 of 2)	NM_001097155 tox4 Zv9_NA972:2267-10440 (-), ENSDART00000092701 TOX4 (1 of 2) Zv9_NA972:2069-15965 (-)	Zv9_NA972:2069-15965	-	0	No 3P tags	-	0	0
CABZ01102527.1	ENSDART00000122278 CABZ01102527.1 Zv9_NA974:106-1101 (+), NM_001108331 Ap1s1 Zv9_NA974:350-663 (+)	Zv9_NA974:106-1101	+	0	No 3P tags	-	0	0
TFR2 (1 of 2)	ENSDART00000127744 TFR2 (1 of 2) Zv9_NA978:353-3761 (-)	Zv9_NA978:353-3761	-	0	No 3P tags	-	0	0
PLXND1 (1 of 2)	ENSDART00000123414 PLXND1 (1 of 2) Zv9_NA979:20-854 (-)	Zv9_NA979:20-854	-	0	No 3P tags	-	0	0
pin1	ENSDART00000123295 pin1 Zv9_NA985:305-956 (-)	Zv9_NA985:304-956	-	0	No 3P tags	-	0	0
RHO (2 of 3)	ENSDART00000122886 RHO (2 of 3) Zv9_NA986:129-1638 (-)	Zv9_NA986:129-1638	-	0	No 3P tags	-	0	0
CABZ01109599.1	ENSDART00000121903 CABZ01109599.1 Zv9_NA988:265-2023 (-)	Zv9_NA988:265-2023	-	0	No 3P tags	-	0	0
DDAH1	ENSDART00000101405 DDAH1 Zv9_NA991:2677-6612 (+), NM_001004924 ddah2 Zv9_NA991:2686-5453 (+)	Zv9_NA991:2677-6612	+	0	Only extended	2	0	1311	Zv9_NA991:6612-7913	Novel 3'UTR (Extended)	652	2	7018	5	7913	647
CZv9_NA991H1orf52	ENSDART00000112634 CZv9_NA991H1orf52 Zv9_NA991:8686-12326 (+)	Zv9_NA991:8686-12326	+	1	Only annotated	2	753	753	Zv9_NA991:11487-12326	Known 3'UTR	3529	2	12326	3497	12338	32
PPFIA1	ENSDART00000010885 PPFIA1 Zv9_NA992:1505-8417 (-), NM_001033319 Ppfia1 Zv9_NA992:2420-8417 (-)	Zv9_NA992:1505-8417	-	0	No 3P tags	-	0	0
BRPF1	ENSDART00000067828 BRPF1 Zv9_NA994:23314-41061 (+), ENSDART00000125388 BRPF1 Zv9_NA994:23314-41061 (+)	Zv9_NA994:23314-41061	+	0	Only annotated	1	0	56	Zv9_NA994:41061-41117	Known 3'UTR	11	1	41117	11
WNK2 (2 of 2)	ENSDART00000113202 WNK2 (2 of 2) Zv9_NA994:131-19741 (+)	Zv9_NA994:131-19741	+	1	Annotated and revised	3	2218	2218	Zv9_NA994:15894-19741	Known 3'UTR	614	1	19741	614	Novel 3'UTR (Shortened)	58	2	17841	5	18442	53
slco1d1	ENSDART00000127944 slco1d1 Zv9_NA995:3330-39201 (+), ENSDART00000084568 slco1d1 Zv9_NA995:3351-39201 (+)	Zv9_NA995:3330-39201	+	0	None associated with 3' UTR	0	0	0
slco1f3	ENSDART00000113623 slco1f3 Zv9_NA995:97865-108086 (+)	Zv9_NA995:97865-108086	+	1	Only annotated	1	225	225	Zv9_NA995:107861-108086	Known 3'UTR	52	1	108086	52
slco1f2	ENSDART00000051754 slco1f2 Zv9_NA995:129990-141483 (+)	Zv9_NA995:129990-141483	+	0	Only revised	2	0	1576	Zv9_NA995:139765-141341	Novel 3'UTR (Alternative last exon)	46	2	140197	9	141341	37
SLCO1B1	ENSDART00000084538 SLCO1B1 Zv9_NA995:75520-80778 (+)	Zv9_NA995:75520-80778	+	0	Only extended	1	0	162	Zv9_NA995:80778-80940	Novel 3'UTR (Extended)	62	1	80940	62
SMARCA4 (1 of 2)	NM_001131236 SMARCA2 Zv9_NA996:8661-10580 (+), NM_001023463 snf22 Zv9_NA996:104-3894 (+), ENSDART00000003698 SMARCA4 (1 of 2) Zv9_NA996:104-10087 (+)	Zv9_NA996:104-10580	+	0	Only extended	2	0	2109	Zv9_NA996:10087-11872	Novel 3'UTR (Extended)	1118	2	11872	598	12547	520
CABZ01086780.1	NM_001199891 LRP8 Zv9_NA996:16717-18899 (+), ENSDART00000125321 CABZ01086780.1 Zv9_NA996:17541-19242 (+)	Zv9_NA996:16717-19242	+	0	No 3P tags	-	0	0
AKAP17A	ENSDART00000112327 AKAP17A Zv9_NA998:29586-42920 (-), NM_001127246 Akap17a Zv9_NA998:32094-42734 (-)	Zv9_NA998:29586-42920	-	1	Annotated and revised	3	2262	2262	Zv9_NA998:29586-31848	Known 3'UTR	353	1	29586	353	Novel 3'UTR (Shortened)	66	2	30360	40	31691	26
ASMT	ENSDART00000111787 ASMT Zv9_NA998:14408-25816 (-)	Zv9_NA998:14408-25816	-	0	None associated with 3' UTR	0	0	0
NCAM2 (1 of 2)	ENSDART00000078058 NCAM2 (1 of 2) Zv9_NA999:6940-79629 (-)	Zv9_NA999:6940-79668	-	0	Only extended	2	0	875	Zv9_NA999:6352-6940	Novel 3'UTR (Extended)	15	2	6065	6	6352	9
BX248128.2	ENSDART00000127801 BX248128.2 Zv9_scaffold3453:167145-169242 (+), NM_001016767 znf350 Zv9_scaffold3453:167394-168198 (+)	Zv9_scaffold3453:167145-169242	+	0	No 3P tags	-	0	0
BX248128.3	ENSDART00000112810 BX248128.3 Zv9_scaffold3453:61930-62728 (+), ENSDART00000129267 BX248128.3 Zv9_scaffold3453:57662-62728 (+)	Zv9_scaffold3453:57662-62728	+	0	None associated with 3' UTR	0	0	0
zgc:173607	NM_001075931 ZNF621 Zv9_scaffold3453:85351-101998 (-), ENSDART00000127220 zgc:173607 Zv9_scaffold3453:100971-112983 (-)	Zv9_scaffold3453:85351-112983	-	1	None associated with 3' UTR	0	829	0
BX248128.4	ENSDART00000123893 BX248128.4 Zv9_scaffold3453:44138-49826 (-)	Zv9_scaffold3453:44138-49826	-	0	No 3P tags	-	0	0
COL21A1 (2 of 2)	ENSDART00000130646 COL21A1 (2 of 2) Zv9_scaffold3454:11422-20714 (+)	Zv9_scaffold3454:11422-20714	+	0	Only extended	2	0	2857	Zv9_scaffold3454:20714-23571	Novel 3'UTR (Extended)	59	2	23495	10	23571	49
bmp5	ENSDART00000019239 bmp5 Zv9_scaffold3454:26980-53287 (+)	Zv9_scaffold3454:26980-53287	+	0	Only extended	1	0	653	Zv9_scaffold3454:53287-53940	Novel 3'UTR (Extended)	1633	1	53940	1633
aplp	ENSDART00000019920 aplp Zv9_scaffold3455:137386-148097 (-)	Zv9_scaffold3455:137386-154843	-	2	Only extended	1	424	3329	Zv9_scaffold3455:134481-137810	Novel 3'UTR (Extended)	1803	1	134481	1803
kirrel3l	ENSDART00000125405 kirrel3l Zv9_scaffold3455:348775-378693 (-), ENSDART00000113050 kirrel3l Zv9_scaffold3455:348775-423355 (-), ENSDART00000045399 kirrel3l Zv9_scaffold3455:348775-398477 (-)	Zv9_scaffold3455:348775-423355	-	1	Only extended	1	359	1410	Zv9_scaffold3455:347724-349134	Novel 3'UTR (Extended)	208	1	347724	208
CTRL (2 of 3)	ENSDART00000006922 CTRL (2 of 3) Zv9_scaffold3455:23859-32834 (-)	Zv9_scaffold3455:23859-32834	-	0	Only extended	1	0	164	Zv9_scaffold3455:23695-23859	Novel 3'UTR (Extended)	103	1	23695	103
CU915738.1	ENSDART00000085942 CU915738.1 Zv9_scaffold3455:260996-341128 (+)	Zv9_scaffold3455:260996-341128	+	1	Annotated and revised	3	2620	2620	Zv9_scaffold3455:338025-341128	Known 3'UTR	408	1	341128	408	Novel 3'UTR (Shortened)	14	2	338485	6	340919	8
RNH1 (23 of 23)	ENSDART00000106044 RNH1 (23 of 23) Zv9_scaffold3456:4872-12722 (-)	Zv9_scaffold3456:4872-12722	-	0	No 3P tags	-	0	0
CABZ01062423.1	ENSDART00000124619 CABZ01062423.1 Zv9_scaffold3456:46296-56029 (-)	Zv9_scaffold3456:46296-56029	-	0	No 3P tags	-	0	0
RBFOX3 (2 of 2)	ENSDART00000128611 RBFOX3 (2 of 2) Zv9_scaffold3457:31034-98741 (+)	Zv9_scaffold3457:31034-98741	+	0	None associated with 3' UTR	0	0	0
CR388047.2	ENSDART00000124658 CR388047.2 Zv9_scaffold3458:151633-183537 (+)	Zv9_scaffold3458:151633-183537	+	0	None associated with 3' UTR	0	0	0
CR388047.1	ENSDART00000077959 CR388047.1 Zv9_scaffold3458:46623-55769 (+)	Zv9_scaffold3458:46623-55769	+	0	No 3P tags	-	0	0
CR388047.3	ENSDART00000121663 CR388047.3 Zv9_scaffold3458:186344-191799 (+)	Zv9_scaffold3458:186344-191799	+	0	No 3P tags	-	0	0
CR388047.4	ENSDART00000137405 CR388047.4 Zv9_scaffold3458:137241-137958 (+)	Zv9_scaffold3458:137241-137958	+	0	No 3P tags	-	0	0
CR388087.1	ENSDART00000077257 CR388087.1 Zv9_scaffold3459:56918-60487 (+)	Zv9_scaffold3459:56918-60487	+	0	No 3P tags	-	0	0
BX005376.1	ENSDART00000110797 BX005376.1 Zv9_scaffold3459:357292-385646 (+)	Zv9_scaffold3459:357292-385646	+	0	None associated with 3' UTR	0	0	0
BX005376.2	ENSDART00000140525 BX005376.2 Zv9_scaffold3459:298377-310518 (+)	Zv9_scaffold3459:298377-310518	+	0	None associated with 3' UTR	0	0	0
ARX (2 of 2)	ENSDART00000113329 ARX (2 of 2) Zv9_scaffold3460:3214-7915 (+), NM_001114366 Al Zv9_scaffold3460:4519-6183 (+)	Zv9_scaffold3460:3214-7915	+	0	Only extended	1	0	1029	Zv9_scaffold3460:7915-8470	Novel 3'UTR (Extended)	7	1	8470	7
TAOK1 (2 of 3)	ENSDART00000108917 TAOK1 (2 of 3) Zv9_scaffold3460:117151-142768 (+)	Zv9_scaffold3460:117139-142768	+	0	No 3P tags	-	0	0
SPAG16	ENSDART00000115055 SPAG16 Zv9_scaffold3460:103-1963 (-), NM_001134728 Spag16 Zv9_scaffold3460:256-700 (-)	Zv9_scaffold3460:103-1963	-	0	Only extended	1	0	127	Zv9_scaffold3460:129-256	Novel 3'UTR (Extended)	6	1	129	6
pcyt1bb	NM_001067587 Os08g0161800 Zv9_scaffold3460:54883-55275 (+), NM_208639 AGOS_ACL118C Zv9_scaffold3460:58438-58734 (+), ENSDART00000081198 pcyt1bb Zv9_scaffold3460:49290-64545 (+)	Zv9_scaffold3460:49290-64545	+	1	Annotated and revised	4	3810	3810	Zv9_scaffold3460:60735-64545	Known 3'UTR	309	2	64482	17	64545	292	Novel 3'UTR (Shortened)	10	2	61009	6	61347	4
pdk3b	NM_001006259 PDK3 Zv9_scaffold3460:66852-89881 (-), ENSDART00000124107 pdk3b Zv9_scaffold3460:66474-89923 (-)	Zv9_scaffold3460:66474-89923	-	0	Only extended	1	0	3158	Zv9_scaffold3460:63694-66474	Novel 3'UTR (Extended)	102	1	63694	102
BX293993.1	ENSDART00000109963 BX293993.1 Zv9_scaffold3461:228225-245953 (+)	Zv9_scaffold3461:228225-245953	+	0	No 3P tags	-	0	0
BX000442.2	ENSDART00000122380 BX000442.2 Zv9_scaffold3461:25764-38497 (-)	Zv9_scaffold3461:25764-38497	-	0	No 3P tags	-	0	0
BX293993.2	ENSDART00000140709 BX293993.2 Zv9_scaffold3461:255874-265041 (-)	Zv9_scaffold3461:255874-265041	-	0	None associated with 3' UTR	0	0	0
BX000442.1	ENSDART00000109966 BX000442.1 Zv9_scaffold3461:141711-146217 (-)	Zv9_scaffold3461:141711-146217	-	0	No 3P tags	-	0	0
BX548067.4	ENSDART00000140915 BX548067.4 Zv9_scaffold3462:199685-205898 (-)	Zv9_scaffold3462:199685-205898	-	0	No 3P tags	-	0	0
BX548067.1	ENSDART00000127529 BX548067.1 Zv9_scaffold3462:160715-170032 (-)	Zv9_scaffold3462:160715-170032	-	0	No 3P tags	-	0	0
BX548067.3	ENSDART00000123594 BX548067.3 Zv9_scaffold3462:217496-222370 (+)	Zv9_scaffold3462:217496-222370	+	0	No 3P tags	-	0	0
BX548067.2	ENSDART00000125166 BX548067.2 Zv9_scaffold3462:88678-96850 (-)	Zv9_scaffold3462:88678-96850	-	0	No 3P tags	-	0	0
zgc:173719	ENSDART00000109986 zgc:173719 Zv9_scaffold3464:95635-101553 (+)	Zv9_scaffold3464:95635-101553	+	1	No 3P tags	-	90	90
BX088603.2	ENSDART00000126637 BX088603.2 Zv9_scaffold3464:46264-62253 (+)	Zv9_scaffold3464:46264-62253	+	0	Only extended	1	0	360	Zv9_scaffold3464:62253-62613	Novel 3'UTR (Extended)	7	1	62613	7
BX088603.1	NM_001085826 znf568 Zv9_scaffold3464:14576-15299 (+), ENSDART00000110896 BX088603.1 Zv9_scaffold3464:4554-15398 (+)	Zv9_scaffold3464:4554-15398	+	0	No 3P tags	-	0	0
CABZ01021449.1	ENSDART00000128527 CABZ01021449.1 Zv9_scaffold3465:180626-193036 (-)	Zv9_scaffold3465:180626-193036	-	0	None associated with 3' UTR	0	0	0
zgc:152938	ENSDART00000125705 zgc:152938 Zv9_scaffold3465:197798-207404 (+)	Zv9_scaffold3465:197798-207404	+	0	Only extended	3	0	956	Zv9_scaffold3465:207404-208466	Novel 3'UTR (Extended)	613	3	208449	87	208466	311	208485	215
CABZ01021435.2	ENSDART00000126166 CABZ01021435.2 Zv9_scaffold3465:373172-380537 (+)	Zv9_scaffold3465:373172-380537	+	0	None associated with 3' UTR	0	0	0
CABZ01021435.3	ENSDART00000130816 CABZ01021435.3 Zv9_scaffold3465:333326-356150 (-)	Zv9_scaffold3465:333326-356150	-	1	Only annotated	1	2711	2713	Zv9_scaffold3465:333324-336037	Known 3'UTR	106	1	333324	106
CABZ01021437.1	ENSDART00000124136 CABZ01021437.1 Zv9_scaffold3465:322619-326625 (-)	Zv9_scaffold3465:322619-326625	-	0	No 3P tags	-	0	0
CABZ01021450.1	NM_001081065 Zfp707 Zv9_scaffold3465:78418-128681 (-), ENSDART00000123486 CABZ01021450.1 Zv9_scaffold3465:93173-160867 (-)	Zv9_scaffold3465:78418-160867	-	0	Only extended	4	0	2518	Zv9_scaffold3465:90655-93173	Novel 3'UTR (Extended)	660	4	90655	632	90800	4	90916	12	90972	12
ZNF251 (31 of 34)	ENSDART00000124270 ZNF251 (31 of 34) Zv9_scaffold3465:42820-51962 (+)	Zv9_scaffold3465:42820-51962	+	0	No 3P tags	-	0	0
CABZ01021426.1	NM_001012320 ZNF302 Zv9_scaffold3465:486333-491583 (-), ENSDART00000124078 CABZ01021426.1 Zv9_scaffold3465:486285-495751 (-)	Zv9_scaffold3465:486285-495751	-	1	Only extended	1	242	916	Zv9_scaffold3465:486098-486285	Novel 3'UTR (Extended)	4	1	486098	4
CABZ01021454.3	NM_001135633 ZNF80 Zv9_scaffold3465:23538-78215 (-), ENSDART00000121603 CABZ01021454.3 Zv9_scaffold3465:23397-38022 (-)	Zv9_scaffold3465:23397-78215	-	0	None associated with 3' UTR	0	0	0
FP245465.4	ENSDART00000126412 FP245465.4 Zv9_scaffold3465:261781-270523 (-)	Zv9_scaffold3465:261781-270523	-	0	Only extended	1	0	196	Zv9_scaffold3465:261585-261781	Novel 3'UTR (Extended)	6	1	261585	6
FP245465.1	ENSDART00000045678 FP245465.1 Zv9_scaffold3465:236400-253504 (+)	Zv9_scaffold3465:236400-253504	+	1	Annotated and revised	2	605	611	Zv9_scaffold3465:252899-253510	Known 3'UTR	11	1	253510	11	Novel 3'UTR (Shortened)	8	1	253213	8
CABZ01021433.1	ENSDART00000129754 CABZ01021433.1 Zv9_scaffold3465:393076-404340 (-)	Zv9_scaffold3465:393076-404340	-	0	Annotated and revised	4	0	245	Zv9_scaffold3465:392831-393076	Known 3'UTR	129	1	392997	129	Novel 3'UTR (Extended)	329	3	392831	286	392947	6	392968	37
CABZ01021430.1	ENSDART00000130421 CABZ01021430.1 Zv9_scaffold3465:406571-428640 (-)	Zv9_scaffold3465:406571-428640	-	0	None associated with 3' UTR	0	0	0
FP245465.3	ENSDART00000098377 FP245465.3 Zv9_scaffold3465:274939-280119 (-)	Zv9_scaffold3465:274939-280119	-	0	No 3P tags	-	0	0
FP245465.2	ENSDART00000066878 FP245465.2 Zv9_scaffold3465:299554-305284 (-)	Zv9_scaffold3465:299554-305284	-	0	No 3P tags	-	0	0
CR788286.1	ENSDART00000121636 CR788286.1 Zv9_scaffold3466:143430-152507 (-)	Zv9_scaffold3466:143430-152507	-	1	No 3P tags	-	89	89
CYGB (2 of 3)	ENSDART00000074114 CYGB (2 of 3) Zv9_scaffold3467:181930-191703 (-)	Zv9_scaffold3467:181930-191703	-	0	None associated with 3' UTR	0	0	0
CU104716.1	ENSDART00000125884 CU104716.1 Zv9_scaffold3469:23290-36040 (-)	Zv9_scaffold3469:23290-36040	-	0	Only revised	1	0	112	Zv9_scaffold3469:30105-30217	Novel 3'UTR (Alternative last exon)	26	1	30105	26
CU104716.2	ENSDART00000129614 CU104716.2 Zv9_scaffold3469:87677-116458 (-), ENSDART00000127227 CU104716.2 Zv9_scaffold3469:87677-88604 (-)	Zv9_scaffold3469:87677-116458	-	0	None associated with 3' UTR	0	0	0
BX511078.2	ENSDART00000128015 BX511078.2 Zv9_scaffold3470:117829-187939 (+)	Zv9_scaffold3470:117829-189037	+	1	None associated with 3' UTR	0	469	0
BX511078.1	ENSDART00000122771 BX511078.1 Zv9_scaffold3470:148143-200694 (-)	Zv9_scaffold3470:148143-200694	-	0	None associated with 3' UTR	0	0	0
CR388042.1	NM_001076678 ZNF493 Zv9_scaffold3470:314781-364975 (-), NM_001160590 zg57 Zv9_scaffold3470:364537-364936 (-), ENSDART00000128509 CR388042.1 Zv9_scaffold3470:314724-340859 (-)	Zv9_scaffold3470:314724-364975	-	1	No 3P tags	-	417	417
BX511078.3	ENSDART00000134108 BX511078.3 Zv9_scaffold3470:99502-110150 (-)	Zv9_scaffold3470:99502-110150	-	0	No 3P tags	-	0	0
CR388042.2	ENSDART00000141466 CR388042.2 Zv9_scaffold3470:343882-357518 (+)	Zv9_scaffold3470:343882-357518	+	0	No 3P tags	-	0	0
CCBL2 (1 of 4)	ENSDART00000147247 CCBL2 (1 of 4) Zv9_scaffold3471:64075-68311 (+), NM_172404 Ccbl1 Zv9_scaffold3471:68200-69147 (+)	Zv9_scaffold3471:64075-69147	+	0	No 3P tags	-	0	0
PKN2 (2 of 2)	ENSDART00000113923 PKN2 (2 of 2) Zv9_scaffold3471:94942-164739 (-)	Zv9_scaffold3471:94942-164739	-	2	Annotated and revised	6	638	1229	Zv9_scaffold3471:94479-95580	Known 3'UTR	66	2	94942	49	94989	17	Novel 3'UTR (Extended)	366	4	94351	107	94466	33	94479	221	94534	5
ccbl2	ENSDART00000063536 ccbl2 Zv9_scaffold3471:42615-46657 (+)	Zv9_scaffold3471:42615-46657	+	0	Only extended	3	0	172	Zv9_scaffold3471:46657-46829	Novel 3'UTR (Extended)	57	3	46808	24	46829	24	46847	9
BX511020.1	ENSDART00000126803 BX511020.1 Zv9_scaffold3472:12745-38129 (+), NM_001031721 ZNF613 Zv9_scaffold3472:10270-139837 (+)	Zv9_scaffold3472:10270-139837	+	0	None associated with 3' UTR	0	0	0
CU457778.2	ENSDART00000129245 CU457778.2 Zv9_scaffold3473:77093-84141 (+)	Zv9_scaffold3473:77093-84141	+	0	None associated with 3' UTR	0	0	0
CU457778.4	ENSDART00000147456 CU457778.4 Zv9_scaffold3473:135341-145714 (+)	Zv9_scaffold3473:135341-145714	+	0	None associated with 3' UTR	0	0	0
CU457778.3	ENSDART00000122712 CU457778.3 Zv9_scaffold3473:56631-67808 (-)	Zv9_scaffold3473:56631-67808	-	0	None associated with 3' UTR	0	0	0
CABZ01051641.1	ENSDART00000127349 CABZ01051641.1 Zv9_scaffold3473:275627-329819 (-), NM_001145935 Zfp691 Zv9_scaffold3473:251126-329073 (-)	Zv9_scaffold3473:251126-329819	-	1	None associated with 3' UTR	0	33	0
CABZ01051641.2	ENSDART00000141865 CABZ01051641.2 Zv9_scaffold3473:285003-293295 (+)	Zv9_scaffold3473:285003-293295	+	0	None associated with 3' UTR	0	0	0
CU457778.1	ENSDART00000103852 CU457778.1 Zv9_scaffold3473:148971-151329 (+)	Zv9_scaffold3473:148971-151329	+	0	Only extended	3	0	953	Zv9_scaffold3473:151329-152282	Novel 3'UTR (Extended)	85	3	151689	24	151827	20	152282	41
CU929113.1	ENSDART00000126774 CU929113.1 Zv9_scaffold3474:9890-20367 (-)	Zv9_scaffold3474:9890-20367	-	0	No 3P tags	-	0	0
cep72	ENSDART00000080696 cep72 Zv9_scaffold3474:24325-42020 (+)	Zv9_scaffold3474:24325-42020	+	1	Annotated and revised	3	203	203	Zv9_scaffold3474:41817-42020	Known 3'UTR	342	2	41933	4	42020	338	Novel 3'UTR (Shortened)	8	1	41905	8
TPPP	ENSDART00000097289 TPPP Zv9_scaffold3474:52529-56573 (-)	Zv9_scaffold3474:52529-56573	-	0	None associated with 3' UTR	0	0	0
CU137645.1	ENSDART00000027494 CU137645.1 Zv9_scaffold3477:86045-90077 (+)	Zv9_scaffold3477:86045-90077	+	1	Annotated and revised	3	555	560	Zv9_scaffold3477:89522-90082	Known 3'UTR	81	2	90082	48	90092	33	Novel 3'UTR (Shortened)	18	1	89757	18
B4GALNT3 (2 of 3)	ENSDART00000112818 B4GALNT3 (2 of 3) Zv9_scaffold3477:119744-136743 (-), NM_173593 B4GALNT3 Zv9_scaffold3477:120013-136532 (-)	Zv9_scaffold3477:119744-136743	-	0	Only extended	1	0	135	Zv9_scaffold3477:119878-120013	Novel 3'UTR (Extended)	4	1	119878	4
ST8SIA1 (2 of 2)	ENSDART00000078125 ST8SIA1 (2 of 2) Zv9_scaffold3477:34484-51415 (-)	Zv9_scaffold3477:34484-51415	-	0	Only extended	3	0	2293	Zv9_scaffold3477:32191-34484	Novel 3'UTR (Extended)	235	3	32173	7	32191	200	32747	28
zgc:77614	ENSDART00000136310 zgc:77614 Zv9_scaffold3478:63504-64707 (-)	Zv9_scaffold3478:63504-64707	-	0	No 3P tags	-	0	0
zgc:77614	ENSDART00000146187 zgc:77614 Zv9_scaffold3478:21391-22903 (-)	Zv9_scaffold3478:21391-22903	-	0	No 3P tags	-	0	0
zgc:77614	ENSDART00000139238 zgc:77614 Zv9_scaffold3478:39978-41181 (-)	Zv9_scaffold3478:39978-41181	-	0	No 3P tags	-	0	0
zgc:77614	ENSDART00000147206 zgc:77614 Zv9_scaffold3478:44679-45882 (-)	Zv9_scaffold3478:44679-45882	-	0	No 3P tags	-	0	0
zgc:77614	ENSDART00000133448 zgc:77614 Zv9_scaffold3478:30535-31738 (-)	Zv9_scaffold3478:30535-31738	-	0	No 3P tags	-	0	0
zgc:77614	ENSDART00000137186 zgc:77614 Zv9_scaffold3478:77616-78819 (-)	Zv9_scaffold3478:77616-78819	-	0	No 3P tags	-	0	0
zgc:77614	ENSDART00000104285 zgc:77614 Zv9_scaffold3478:16988-18191 (-)	Zv9_scaffold3478:16988-18191	-	0	No 3P tags	-	0	0
zgc:77614	ENSDART00000135751 zgc:77614 Zv9_scaffold3478:35245-36448 (-)	Zv9_scaffold3478:35245-36448	-	0	No 3P tags	-	0	0
zgc:77614	ENSDART00000145493 zgc:77614 Zv9_scaffold3478:68208-69411 (-)	Zv9_scaffold3478:68208-69411	-	0	No 3P tags	-	0	0
zgc:77614	ENSDART00000124281 zgc:77614 Zv9_scaffold3478:82010-83523 (-)	Zv9_scaffold3478:82010-83523	-	0	No 3P tags	-	0	0
zgc:77614	ENSDART00000138118 zgc:77614 Zv9_scaffold3478:54096-55299 (-)	Zv9_scaffold3478:54096-55299	-	0	No 3P tags	-	0	0
zgc:77614	ENSDART00000135152 zgc:77614 Zv9_scaffold3478:72912-74115 (-)	Zv9_scaffold3478:72912-74115	-	0	No 3P tags	-	0	0
GAPVD1 (2 of 2)	ENSDART00000085100 GAPVD1 (2 of 2) Zv9_scaffold3478:110556-135610 (+)	Zv9_scaffold3478:110556-135610	+	0	Only revised	1	0	145	Zv9_scaffold3478:129395-129540	Novel 3'UTR (Alternative last exon)	4	1	129540	4
CT737209.2	ENSDART00000131699 CT737209.2 Zv9_scaffold3478:49389-50592 (-)	Zv9_scaffold3478:49389-50592	-	0	No 3P tags	-	0	0
zgc:77614	ENSDART00000147749 zgc:77614 Zv9_scaffold3478:58800-60003 (-)	Zv9_scaffold3478:58800-60003	-	0	No 3P tags	-	0	0
CR628395.2	NM_001014017 Zfp819 Zv9_scaffold3480:174291-272107 (-), ENSDART00000130228 CR628395.2 Zv9_scaffold3480:271267-321302 (-)	Zv9_scaffold3480:174291-321302	-	0	None associated with 3' UTR	0	0	0
CR628395.1	ENSDART00000125434 CR628395.1 Zv9_scaffold3480:217836-265307 (+)	Zv9_scaffold3480:217836-265307	+	1	Only annotated	1	1329	1329	Zv9_scaffold3480:263978-265307	Known 3'UTR	91	1	265307	91
CR388390.1	NM_024106 ZNF426 Zv9_scaffold3480:14901-122764 (+), ENSDART00000124412 CR388390.1 Zv9_scaffold3480:14412-123254 (+)	Zv9_scaffold3480:14412-123254	+	1	None associated with 3' UTR	0	66	0
CR628395.3	ENSDART00000114494 CR628395.3 Zv9_scaffold3480:336182-353926 (-), ENSDART00000111593 CR628395.3 Zv9_scaffold3480:336182-353914 (-)	Zv9_scaffold3480:336182-353926	-	0	No 3P tags	-	0	0
CU207245.1	ENSDART00000099981 CU207245.1 Zv9_scaffold3482:148542-153877 (+)	Zv9_scaffold3482:148542-153877	+	0	Only extended	1	0	252	Zv9_scaffold3482:153877-154129	Novel 3'UTR (Extended)	21	1	154129	21
zgc:173619	ENSDART00000109374 zgc:173619 Zv9_scaffold3482:136843-141706 (-)	Zv9_scaffold3482:136843-141706	-	0	No 3P tags	-	0	0
CU302413.1	ENSDART00000125510 CU302413.1 Zv9_scaffold3482:43529-48853 (-)	Zv9_scaffold3482:43529-48853	-	0	None associated with 3' UTR	0	0	0
CU302413.2	ENSDART00000128449 CU302413.2 Zv9_scaffold3482:26451-76334 (+), NM_001159524 ZNF735 Zv9_scaffold3482:75554-76084 (+)	Zv9_scaffold3482:26451-76334	+	0	None associated with 3' UTR	0	0	0
CU207245.2	ENSDART00000127541 CU207245.2 Zv9_scaffold3482:254507-269352 (-), NM_001131316 ZNF334 Zv9_scaffold3482:160511-269253 (-)	Zv9_scaffold3482:160511-269352	-	1	None associated with 3' UTR	0	30	0
CU207245.3	ENSDART00000122541 CU207245.3 Zv9_scaffold3482:218288-238620 (+)	Zv9_scaffold3482:218288-238620	+	0	None associated with 3' UTR	0	0	0
MTMR4	ENSDART00000129940 MTMR4 Zv9_scaffold3484:55544-106981 (+), ENSDART00000056149 MTMR4 Zv9_scaffold3484:55582-106981 (+)	Zv9_scaffold3484:55544-106981	+	1	Annotated and revised	3	3045	3045		Known 3'UTR	769	1	106981	769	Novel 3'UTR (Shortened)	71	2	104377	9	106112	62
CLEC3A	ENSDART00000084118 CLEC3A Zv9_scaffold3485:179802-187004 (+)	Zv9_scaffold3485:179802-187010	+	1	No 3P tags	-	6	6
BCMO1 (2 of 2)	ENSDART00000046776 BCMO1 (2 of 2) Zv9_scaffold3485:32005-44716 (+), NM_133217 Bco2 Zv9_scaffold3485:35499-44243 (+)	Zv9_scaffold3485:32005-44716	+	1	Only annotated	1	410	410	Zv9_scaffold3485:44306-44716	Known 3'UTR	144	1	44716	144
DKK3 (1 of 2)	ENSDART00000111046 DKK3 (1 of 2) Zv9_scaffold3485:266551-284328 (-)	Zv9_scaffold3485:266551-284328	-	1	Only extended	1	39	299	Zv9_scaffold3485:266291-266590	Novel 3'UTR (Extended)	44	1	266291	44
MICAL2 (3 of 3)	ENSDART00000130148 MICAL2 (3 of 3) Zv9_scaffold3485:325732-326041 (+)	Zv9_scaffold3485:325732-326041	+	0	No 3P tags	-	0	0
CABZ01078654.1	ENSDART00000126235 CABZ01078654.1 Zv9_scaffold3485:321-7340 (-)	Zv9_scaffold3485:321-7340	-	0	No 3P tags	-	0	0
bcmo1	ENSDART00000105103 bcmo1 Zv9_scaffold3485:64571-82482 (+), NM_204635 BCMO1 Zv9_scaffold3485:64623-75427 (+)	Zv9_scaffold3485:64571-82482	+	1	Annotated and revised	3	114	215	Zv9_scaffold3485:82368-82482	Known 3'UTR	2217	2	82422	36	82482	2181	Novel 3'UTR (Extended)	26	1	82583	26
BOLA3	ENSDART00000056858 BOLA3 Zv9_scaffold3485:88975-98522 (+)	Zv9_scaffold3485:88975-98522	+	1	Annotated and revised	3	410	414	Zv9_scaffold3485:98112-98526	Known 3'UTR	1438	2	98466	354	98526	1084	Novel 3'UTR (Shortened)	8	1	98237	8
VAT1L	ENSDART00000126956 VAT1L Zv9_scaffold3485:101775-166677 (+)	Zv9_scaffold3485:101766-166677	+	0	Only extended	2	0	396	Zv9_scaffold3485:166677-167073	Novel 3'UTR (Extended)	21	2	166823	4	167073	17
usp47	NM_001095165 usp47 Zv9_scaffold3485:190794-255569 (+), ENSDART00000129206 usp47 Zv9_scaffold3485:190589-227559 (+)	Zv9_scaffold3485:190589-255569	+	1	Only extended	8	418	1421	Zv9_scaffold3485:255569-256228	Novel 3'UTR (Extended)	1045	8	255843	14	256228	772	256246	16	256839	161	256849	13	256878	13	256990	45	257002	11
SHISA6 (3 of 3)	NM_001191922 Shisa6 Zv9_scaffold3486:112455-149007 (-), ENSDART00000123796 SHISA6 (3 of 3) Zv9_scaffold3486:63829-149205 (-)	Zv9_scaffold3486:63829-149205	-	0	No 3P tags	-	0	0
-	ENSDART00000128517 Zv9_scaffold3487:224359-224707 (+)	Zv9_scaffold3487:224359-224707	+	0	None associated with 3' UTR	0	0	0
zgc:153845	ENSDART00000008337 zgc:153845 Zv9_scaffold3487:159486-160978 (+)	Zv9_scaffold3487:159486-160978	+	1	Only annotated	2	827	833	Zv9_scaffold3487:160151-160984	Known 3'UTR	516	2	160892	31	160984	485
CABZ01078634.1	ENSDART00000114832 CABZ01078634.1 Zv9_scaffold3487:211203-220965 (+)	Zv9_scaffold3487:211203-220965	+	1	No 3P tags	-	2777	2777
PRPSAP1	ENSDART00000053076 PRPSAP1 Zv9_scaffold3487:178384-204959 (-)	Zv9_scaffold3487:178373-204965	-	1	Only extended	4	11	1459	Zv9_scaffold3487:178051-178384	Novel 3'UTR (Extended)	1595	4	176925	151	178051	1061	178202	63	178216	320
CABZ01044157.1	ENSDART00000098333 CABZ01044157.1 Zv9_scaffold3487:92405-99836 (+)	Zv9_scaffold3487:92405-99836	+	0	None associated with 3' UTR	0	0	0
BX324179.1	ENSDART00000064307 BX324179.1 Zv9_scaffold3488:126203-137398 (+), ENSDART00000127437 BX324179.1 Zv9_scaffold3488:129231-136814 (+)	Zv9_scaffold3488:126203-137398	+	0	No 3P tags	-	0	0
BX324179.3	ENSDART00000129962 BX324179.3 Zv9_scaffold3488:93956-100340 (+)	Zv9_scaffold3488:93956-100340	+	0	Only extended	1	0	410	Zv9_scaffold3488:100340-100750	Novel 3'UTR (Extended)	6	1	100750	6
BX324179.2	NM_001172295 LOC100337651 Zv9_scaffold3488:25331-57665 (-), ENSDART00000125985 BX324179.2 Zv9_scaffold3488:25265-79161 (-)	Zv9_scaffold3488:25265-79161	-	0	None associated with 3' UTR	0	0	0
CT737138.1	ENSDART00000130935 CT737138.1 Zv9_scaffold3488:3764-10595 (+)	Zv9_scaffold3488:3764-10595	+	0	Only extended	1	0	170	Zv9_scaffold3488:10595-10765	Novel 3'UTR (Extended)	7	1	10765	7
CU138503.4	ENSDART00000101501 CU138503.4 Zv9_scaffold3489:6268-6772 (+)	Zv9_scaffold3489:6268-6772	+	0	Only extended	2	0	288	Zv9_scaffold3489:6772-7060	Novel 3'UTR (Extended)	3006	2	7060	2985	7070	21
ubxn1	ENSDART00000123760 ubxn1 Zv9_scaffold3489:132633-143489 (-)	Zv9_scaffold3489:132633-143489	-	1	Annotated and revised	3	274	300	Zv9_scaffold3489:132607-132907	Known 3'UTR	776	2	132607	568	132621	208	Novel 3'UTR (Shortened)	14	1	132736	14
EHD1 (2 of 3)	ENSDART00000123102 EHD1 (2 of 3) Zv9_scaffold3489:151229-161167 (+)	Zv9_scaffold3489:151229-161167	+	0	No 3P tags	-	0	0
RARRES3 (2 of 4)	NM_004585 RARRES3 Zv9_scaffold3489:45255-45707 (-), ENSDART00000105403 RARRES3 (2 of 4) Zv9_scaffold3489:43414-48764 (-)	Zv9_scaffold3489:43414-48764	-	0	Annotated and revised	4	0	957	Zv9_scaffold3489:42592-43414	Known 3'UTR	166	2	43337	96	43378	70	Novel 3'UTR (Extended)	6299	2	42592	6252	43118	47
CU138503.2	ENSDART00000021944 CU138503.2 Zv9_scaffold3489:103438-126188 (+)	Zv9_scaffold3489:103438-126188	+	0	None associated with 3' UTR	0	0	0
INTS5 (2 of 2)	ENSDART00000109483 INTS5 (2 of 2) Zv9_scaffold3489:60732-64679 (+), NM_001098026 INTS5 Zv9_scaffold3489:61152-63732 (+)	Zv9_scaffold3489:60732-64679	+	0	Only extended	1	0	274	Zv9_scaffold3489:63732-64006	Novel 3'UTR (Extended)	29	1	64006	29
SCYL1 (1 of 2)	ENSDART00000007671 SCYL1 (1 of 2) Zv9_scaffold3489:18483-39312 (+)	Zv9_scaffold3489:18483-39312	+	1	Annotated and revised	5	649	665	Zv9_scaffold3489:38663-39328	Known 3'UTR	729	2	39313	340	39328	389	Novel 3'UTR (Shortened)	100	3	38764	26	39142	6	39162	68
RARRES3 (4 of 4)	ENSDART00000105402 RARRES3 (4 of 4) Zv9_scaffold3489:50131-56511 (-)	Zv9_scaffold3489:50131-56511	-	1	Annotated and revised	3	776	811	Zv9_scaffold3489:50805-50907	Known 3'UTR	79	1	50096	79	Novel 3'UTR (Shortened)	107	2	50637	7	50805	100
GANAB (2 of 3)	ENSDART00000113271 GANAB (2 of 3) Zv9_scaffold3489:65005-100755 (+), NM_001097763 ganab Zv9_scaffold3489:66782-96514 (+)	Zv9_scaffold3489:65005-100755	+	1	Annotated and revised	2	1136	1136	Zv9_scaffold3489:99619-100755	Known 3'UTR	5178	1	100755	5178	Novel 3'UTR (Shortened)	5	1	100125	5
BX664622.1	NM_198494 ZNF642 Zv9_scaffold3490:144440-155219 (-), NM_001016882 znf33b Zv9_scaffold3490:144443-145575 (-), ENSDART00000123526 BX664622.1 Zv9_scaffold3490:154676-161401 (-)	Zv9_scaffold3490:144440-161401	-	0	Only extended	1	0	428	Zv9_scaffold3490:154248-154676	Novel 3'UTR (Extended)	68	1	154248	68
BX664622.3	ENSDART00000124681 BX664622.3 Zv9_scaffold3490:168237-174367 (+)	Zv9_scaffold3490:168237-174377	+	0	Only extended	1	0	547	Zv9_scaffold3490:174367-174914	Novel 3'UTR (Extended)	4	1	174914	4
BX664622.2	ENSDART00000129096 BX664622.2 Zv9_scaffold3490:24689-69810 (-)	Zv9_scaffold3490:24689-69810	-	0	None associated with 3' UTR	0	0	0
CABZ01049117.1	NM_001163065 LOC100302406 Zv9_scaffold3490:189878-190328 (-), ENSDART00000108530 CABZ01049117.1 Zv9_scaffold3490:189617-190523 (-)	Zv9_scaffold3490:189617-190523	-	0	No 3P tags	-	0	0
CT737182.1	ENSDART00000128076 CT737182.1 Zv9_scaffold3491:180476-206889 (-)	Zv9_scaffold3491:180476-206889	-	0	None associated with 3' UTR	0	0	0
CU457816.2	ENSDART00000146429 CU457816.2 Zv9_scaffold3491:6132-17980 (-)	Zv9_scaffold3491:6132-17980	-	0	No 3P tags	-	0	0
RNH1 (22 of 23)	ENSDART00000110156 RNH1 (22 of 23) Zv9_scaffold3491:155390-163220 (+)	Zv9_scaffold3491:155390-163220	+	0	No 3P tags	-	0	0
RNH1 (14 of 23)	ENSDART00000140911 RNH1 (14 of 23) Zv9_scaffold3491:32893-44457 (-)	Zv9_scaffold3491:32893-44457	-	0	No 3P tags	-	0	0
CT737182.3	ENSDART00000133741 CT737182.3 Zv9_scaffold3491:121199-132470 (-)	Zv9_scaffold3491:121199-132470	-	0	No 3P tags	-	0	0
CU182823.4	ENSDART00000130948 CU182823.4 Zv9_scaffold3493:10184-14280 (+)	Zv9_scaffold3493:9748-14450	+	1	No 3P tags	-	170	170
CU182823.3	ENSDART00000121662 CU182823.3 Zv9_scaffold3493:44226-67165 (+)	Zv9_scaffold3493:44226-67165	+	0	None associated with 3' UTR	0	0	0
CU182823.2	ENSDART00000128092 CU182823.2 Zv9_scaffold3493:117345-123681 (+)	Zv9_scaffold3493:117345-123681	+	0	No 3P tags	-	0	0
CU182823.1	ENSDART00000112604 CU182823.1 Zv9_scaffold3493:131445-131855 (-), ENSDART00000081068 CU182823.1 Zv9_scaffold3493:131717-133823 (-)	Zv9_scaffold3493:131445-133823	-	0	No 3P tags	-	0	0
CR792415.1	ENSDART00000128168 CR792415.1 Zv9_scaffold3494:104435-105192 (-)	Zv9_scaffold3494:104435-105192	-	0	No 3P tags	-	0	0
zgc:171886	ENSDART00000121856 zgc:171886 Zv9_scaffold3494:153645-155631 (-)	Zv9_scaffold3494:153645-155631	-	1	No 3P tags	-	569	569
GPR179 (1 of 2)	ENSDART00000111970 GPR179 (1 of 2) Zv9_scaffold3496:10708-20074 (-)	Zv9_scaffold3496:10708-20074	-	0	No 3P tags	-	0	0
LPL (1 of 2)	ENSDART00000124328 LPL (1 of 2) Zv9_scaffold3497:29342-57902 (+), NM_008509 Lpl Zv9_scaffold3497:30097-45536 (+)	Zv9_scaffold3497:29342-57902	+	1	Annotated and revised	5	4088	4088	Zv9_scaffold3497:53814-57902	Known 3'UTR	120	1	57902	120	Novel 3'UTR (Shortened)	45	4	53830	21	53849	12	55370	5	56709	7
AP1M1	ENSDART00000053427 AP1M1 Zv9_scaffold3497:93629-108394 (+)	Zv9_scaffold3497:93608-108394	+	0	No 3P tags	-	0	0
BX927374.1	ENSDART00000126695 BX927374.1 Zv9_scaffold3498:41945-62861 (-)	Zv9_scaffold3498:41945-62861	-	0	No 3P tags	-	0	0
CR927215.2	ENSDART00000127265 CR927215.2 Zv9_scaffold3498:319682-326956 (-)	Zv9_scaffold3498:319682-326956	-	0	None associated with 3' UTR	0	0	0
CR927215.3	ENSDART00000124398 CR927215.3 Zv9_scaffold3498:298097-312930 (+)	Zv9_scaffold3498:298097-312930	+	0	No 3P tags	-	0	0
CR927215.1	ENSDART00000127967 CR927215.1 Zv9_scaffold3498:213094-338670 (+), NM_001172295 LOC100337651 Zv9_scaffold3498:337073-337879 (+), NM_001096768 znf16 Zv9_scaffold3498:197831-246168 (+)	Zv9_scaffold3498:197831-338670	+	0	None associated with 3' UTR	0	0	0
olfcd2	ENSDART00000099219 olfcd2 Zv9_scaffold3499:28769-31890 (+)	Zv9_scaffold3499:28769-31890	+	0	None associated with 3' UTR	0	0	0
CU929403.1	ENSDART00000003955 CU929403.1 Zv9_scaffold3499:7630-12282 (+)	Zv9_scaffold3499:7630-12282	+	0	None associated with 3' UTR	0	0	0
NLRX1 (9 of 41)	ENSDART00000110521 NLRX1 (9 of 41) Zv9_scaffold3501:133587-143706 (+)	Zv9_scaffold3501:133587-143706	+	0	No 3P tags	-	0	0
BX942821.1	ENSDART00000109271 BX942821.1 Zv9_scaffold3501:95299-106542 (-)	Zv9_scaffold3501:95299-106542	-	0	No 3P tags	-	0	0
BX942821.2	ENSDART00000099176 BX942821.2 Zv9_scaffold3501:2302-5631 (+)	Zv9_scaffold3501:2302-5631	+	0	No 3P tags	-	0	0
BX470149.1	ENSDART00000125186 BX470149.1 Zv9_scaffold3503:321563-327819 (+)	Zv9_scaffold3503:321563-327819	+	1	No 3P tags	-	961	961
BX294653.1	ENSDART00000111920 BX294653.1 Zv9_scaffold3503:643870-674026 (-)	Zv9_scaffold3503:643870-674026	-	0	No 3P tags	-	0	0
BX294653.5	ENSDART00000143651 BX294653.5 Zv9_scaffold3503:713415-719241 (+)	Zv9_scaffold3503:713415-719241	+	0	No 3P tags	-	0	0
ZNF764	NM_001016882 znf33b Zv9_scaffold3503:300080-411307 (-), ENSDART00000138091 ZNF764 Zv9_scaffold3503:364279-411787 (-)	Zv9_scaffold3503:300080-411787	-	1	Only extended	1	33	465	Zv9_scaffold3503:363814-364279	Novel 3'UTR (Extended)	7	1	363814	7
BX294653.2	ENSDART00000123751 BX294653.2 Zv9_scaffold3503:581445-598968 (+)	Zv9_scaffold3503:581445-598968	+	0	None associated with 3' UTR	0	0	0
BX294653.3	ENSDART00000130598 BX294653.3 Zv9_scaffold3503:555879-569041 (+)	Zv9_scaffold3503:555879-569041	+	0	No 3P tags	-	0	0
BX324142.1	ENSDART00000136396 BX324142.1 Zv9_scaffold3503:376379-381341 (+), ENSDART00000135611 BX324142.1 Zv9_scaffold3503:380447-381725 (+)	Zv9_scaffold3503:376379-381725	+	0	None associated with 3' UTR	0	0	0
CR450840.2	ENSDART00000131853 CR450840.2 Zv9_scaffold3503:152031-158906 (+), NM_001126839 LOC100145373 Zv9_scaffold3503:151581-159001 (+)	Zv9_scaffold3503:151581-159001	+	1	Only annotated	1	138	398	Zv9_scaffold3503:158542-158940	Known 3'UTR	8	1	158940	8
CR450840.3	ENSDART00000142093 CR450840.3 Zv9_scaffold3503:59719-60865 (+)	Zv9_scaffold3503:59719-60865	+	0	None associated with 3' UTR	0	0	0
BX324142.4	ENSDART00000141531 BX324142.4 Zv9_scaffold3503:463116-469433 (+)	Zv9_scaffold3503:463116-469433	+	0	Only extended	1	0	148	Zv9_scaffold3503:469433-469581	Novel 3'UTR (Extended)	33	1	469581	33
BX321887.1	NM_003431 ZNF124 Zv9_scaffold3503:821052-836111 (-), ENSDART00000129508 BX321887.1 Zv9_scaffold3503:820884-896912 (-)	Zv9_scaffold3503:820884-896912	-	0	None associated with 3' UTR	0	0	0
BX324155.1	ENSDART00000040430 BX324155.1 Zv9_scaffold3503:754303-756500 (-)	Zv9_scaffold3503:754303-756500	-	0	No 3P tags	-	0	0
BX294653.4	ENSDART00000138521 BX294653.4 Zv9_scaffold3503:697871-710957 (-)	Zv9_scaffold3503:697871-710957	-	0	No 3P tags	-	0	0
CU466240.1	ENSDART00000113338 CU466240.1 Zv9_scaffold3503:211514-218553 (+)	Zv9_scaffold3503:211514-218553	+	0	No 3P tags	-	0	0
BX324142.3	ENSDART00000137753 BX324142.3 Zv9_scaffold3503:430314-437528 (+)	Zv9_scaffold3503:430314-437528	+	0	None associated with 3' UTR	0	0	0
BX324155.2	ENSDART00000147163 BX324155.2 Zv9_scaffold3503:781204-788243 (+)	Zv9_scaffold3503:781204-788243	+	0	None associated with 3' UTR	0	0	0
CR450840.1	ENSDART00000115096 CR450840.1 Zv9_scaffold3503:69979-77090 (-)	Zv9_scaffold3503:69979-77090	-	0	None associated with 3' UTR	0	0	0
mib	ENSDART00000128234 mib Zv9_scaffold3504:38977-65722 (-)	Zv9_scaffold3504:38977-65722	-	0	None associated with 3' UTR	0	0	0
PTCHD3 (1 of 3)	ENSDART00000126422 PTCHD3 (1 of 3) Zv9_scaffold3504:553-997 (-), NM_029049 Ptchd3 Zv9_scaffold3504:379-1018 (-)	Zv9_scaffold3504:379-1018	-	0	No 3P tags	-	0	0
rab18b	ENSDART00000042737 rab18b Zv9_scaffold3504:8948-22048 (+)	Zv9_scaffold3504:8948-22048	+	1	Annotated and revised	11	1081	3520	Zv9_scaffold3504:20967-21481	Known 3'UTR	192	3	22037	4	22048	179	22112	9	Novel 3'UTR (Extended)	6	1	24487	6	Novel 3'UTR (Shortened)	1026	7	21077	12	21346	8	21465	125	21481	859	21524	9	21558	9	21683	4
yme1l1	ENSDART00000123541 yme1l1 Zv9_scaffold3504:69384-82038 (+)	Zv9_scaffold3504:69384-82038	+	0	No 3P tags	-	0	0
UNC13C (3 of 3)	ENSDART00000075229 UNC13C (3 of 3) Zv9_scaffold3505:93864-120604 (-), ENSDART00000124494 UNC13C (3 of 3) Zv9_scaffold3505:16695-95106 (-)	Zv9_scaffold3505:16695-120604	-	1	No 3P tags	-	4330	4330
CU138542.2	ENSDART00000111488 CU138542.2 Zv9_scaffold3506:44852-117023 (-)	Zv9_scaffold3506:44852-117023	-	0	No 3P tags	-	0	0
CU138542.3	ENSDART00000130795 CU138542.3 Zv9_scaffold3506:185120-205552 (+), NM_032788 ZNF514 Zv9_scaffold3506:204895-205640 (+)	Zv9_scaffold3506:185120-205640	+	0	None associated with 3' UTR	0	0	0
CU138542.4	ENSDART00000130517 CU138542.4 Zv9_scaffold3506:145972-169531 (-)	Zv9_scaffold3506:145972-169531	-	0	Only revised	2	0	533	Zv9_scaffold3506:168245-168778	Novel 3'UTR (Alternative last exon)	69	2	168228	4	168245	65
CU138542.1	ENSDART00000125965 CU138542.1 Zv9_scaffold3506:99100-106394 (+)	Zv9_scaffold3506:99100-106394	+	0	No 3P tags	-	0	0
LRRC24 (2 of 2)	ENSDART00000057160 LRRC24 (2 of 2) Zv9_scaffold3509:164900-180338 (-), NM_001024678 LRRC24 Zv9_scaffold3509:165116-171595 (-)	Zv9_scaffold3509:164900-180338	-	0	None associated with 3' UTR	0	0	0
CT027690.4	ENSDART00000123014 CT027690.4 Zv9_scaffold3509:141560-152572 (+)	Zv9_scaffold3509:141560-152572	+	0	None associated with 3' UTR	0	0	0
CT027690.3	ENSDART00000110733 CT027690.3 Zv9_scaffold3509:103898-106854 (+)	Zv9_scaffold3509:103898-106854	+	0	No 3P tags	-	0	0
CT027690.2	ENSDART00000113872 CT027690.2 Zv9_scaffold3509:233338-236216 (+)	Zv9_scaffold3509:233338-236216	+	0	No 3P tags	-	0	0
CR762480.5	ENSDART00000134508 CR762480.5 Zv9_scaffold3510:45752-46679 (+)	Zv9_scaffold3510:45752-46679	+	0	No 3P tags	-	0	0
zgc:171310	ENSDART00000100879 zgc:171310 Zv9_scaffold3510:13745-15095 (+)	Zv9_scaffold3510:13745-15095	+	1	No 3P tags	-	132	132
CR762480.4	ENSDART00000140192 CR762480.4 Zv9_scaffold3510:116497-117424 (+)	Zv9_scaffold3510:116497-117424	+	0	No 3P tags	-	0	0
CR762480.2	ENSDART00000111057 CR762480.2 Zv9_scaffold3510:73043-73856 (+)	Zv9_scaffold3510:73043-73856	+	0	No 3P tags	-	0	0
CR762480.3	ENSDART00000139075 CR762480.3 Zv9_scaffold3510:144392-145319 (+)	Zv9_scaffold3510:144392-145319	+	0	No 3P tags	-	0	0
zgc:171310	ENSDART00000097502 zgc:171310 Zv9_scaffold3510:162676-164020 (+)	Zv9_scaffold3510:162676-164020	+	1	None associated with 3' UTR	0	132	0
CR847571.1	ENSDART00000123525 CR847571.1 Zv9_scaffold3510:239649-240576 (+)	Zv9_scaffold3510:239649-240576	+	0	No 3P tags	-	0	0
CR762480.1	ENSDART00000110406 CR762480.1 Zv9_scaffold3510:85203-86016 (+)	Zv9_scaffold3510:85203-86016	+	0	No 3P tags	-	0	0
psmd7	NM_001141146 psd7 Zv9_scaffold3511:28128-34330 (-), ENSDART00000098229 psmd7 Zv9_scaffold3511:27577-34396 (-)	Zv9_scaffold3511:27577-34396	-	2	Annotated and revised	7	456	459	Zv9_scaffold3511:27699-28033	Known 3'UTR	774	2	27574	719	27606	55	Novel 3'UTR (Shortened)	3115	5	27689	7	27699	2443	27709	51	27882	67	27936	547
zgc:92195	NM_025225 PNPLA3 Zv9_scaffold3512:30765-43065 (+), ENSDART00000064726 zgc:92195 Zv9_scaffold3512:30684-45752 (+)	Zv9_scaffold3512:30684-45752	+	1	Annotated and revised	3	375	1021	Zv9_scaffold3512:45377-46050	Known 3'UTR	9	1	45757	9	Novel 3'UTR (Extended)	223	2	45993	92	46050	131
sult4a1	ENSDART00000091573 sult4a1 Zv9_scaffold3512:15194-28738 (-)	Zv9_scaffold3512:15194-28738	-	1	Annotated and revised	4	1860	1857	Zv9_scaffold3512:15197-17054	Known 3'UTR	2190	3	15176	9	15187	30	15197	2151	Novel 3'UTR (Shortened)	5	1	16512	5
TTLL12	ENSDART00000023846 TTLL12 Zv9_scaffold3512:46745-82380 (+)	Zv9_scaffold3512:46745-82380	+	1	Only annotated	1	71	65	Zv9_scaffold3512:82309-82374	Known 3'UTR	578	1	82374	578
CR450780.2	ENSDART00000110893 CR450780.2 Zv9_scaffold3514:81916-87158 (+)	Zv9_scaffold3514:81916-87158	+	0	No 3P tags	-	0	0
zgc:173714	ENSDART00000110153 zgc:173714 Zv9_scaffold3514:158371-165432 (-)	Zv9_scaffold3514:158371-165432	-	1	Only annotated	1	619	619	Zv9_scaffold3514:158371-158990	Known 3'UTR	39	1	158371	39
CR450780.1	ENSDART00000130649 CR450780.1 Zv9_scaffold3514:167917-173426 (+), ENSDART00000112148 CR450780.1 Zv9_scaffold3514:167917-175444 (+)	Zv9_scaffold3514:167917-175444	+	0	Only extended	1	0	416		Novel 3'UTR (Extended)	8	1	173842	8
CR450780.4	ENSDART00000130334 CR450780.4 Zv9_scaffold3514:39074-49726 (-)	Zv9_scaffold3514:39074-49726	-	0	No 3P tags	-	0	0
CR450780.3	ENSDART00000129790 CR450780.3 Zv9_scaffold3514:53645-80138 (+)	Zv9_scaffold3514:53645-80138	+	0	None associated with 3' UTR	0	0	0
NTRK3 (2 of 2)	ENSDART00000091728 NTRK3 (2 of 2) Zv9_scaffold3515:11116-273941 (-)	Zv9_scaffold3515:11110-273941	-	1	Only extended	2	6	1295	Zv9_scaffold3515:9821-11116	Novel 3'UTR (Extended)	381	2	9809	19	9821	362
CABZ01079241.1	ENSDART00000112252 CABZ01079241.1 Zv9_scaffold3516:11868-37339 (-)	Zv9_scaffold3516:11868-37339	-	0	Annotated and revised	7	0	4242	Zv9_scaffold3516:10374-11868	Known 3'UTR	8	1	11864	8	Novel 3'UTR (Extended)	222	6	7626	68	10374	94	10900	4	11508	42	11649	10	11756	4
apooa	ENSDART00000121857 apooa Zv9_scaffold3516:63879-100057 (+), ENSDART00000127710 apooa Zv9_scaffold3516:63911-100053 (+), ENSDART00000067863 apooa Zv9_scaffold3516:67488-100057 (+)	Zv9_scaffold3516:63879-100057	+	1	Only annotated	3	230	230		Known 3'UTR	953	3	100043	5	100057	908	100084	40
CZv9_scaffold3516HXorf58	ENSDART00000126599 CZv9_scaffold3516HXorf58 Zv9_scaffold3516:50251-60900 (-)	Zv9_scaffold3516:50251-60900	-	0	Annotated and revised	3	0	329	Zv9_scaffold3516:50181-50251	Known 3'UTR	389	1	50181	389	Novel 3'UTR (Extended)	26	2	49922	8	49983	18
BX004873.1	NM_001078828 MGC145688 Zv9_scaffold3517:76285-113819 (-), ENSDART00000126398 BX004873.1 Zv9_scaffold3517:76207-114012 (-)	Zv9_scaffold3517:76207-114012	-	0	None associated with 3' UTR	0	0	0
BX004873.3	ENSDART00000125194 BX004873.3 Zv9_scaffold3517:133267-150745 (-)	Zv9_scaffold3517:133267-150745	-	1	Only annotated	1	1067	1071	Zv9_scaffold3517:133263-134334	Known 3'UTR	19	1	133263	19
BX537144.1	ENSDART00000128408 BX537144.1 Zv9_scaffold3517:9957-14755 (+), ENSDART00000130362 BX537144.1 Zv9_scaffold3517:9819-14755 (+)	Zv9_scaffold3517:9819-14755	+	0	None associated with 3' UTR	0	0	0
BX004873.2	ENSDART00000123690 BX004873.2 Zv9_scaffold3517:90711-167294 (+), NM_001171529 znf184 Zv9_scaffold3517:91035-166908 (+)	Zv9_scaffold3517:90711-167294	+	0	None associated with 3' UTR	0	0	0
BX004873.4	ENSDART00000139987 BX004873.4 Zv9_scaffold3517:188080-193327 (-)	Zv9_scaffold3517:188080-193327	-	0	None associated with 3' UTR	0	0	0
zgc:101560	ENSDART00000034692 zgc:101560 Zv9_scaffold3518:11357-17894 (-)	Zv9_scaffold3518:11357-17894	-	1	Only annotated	1	869	869	Zv9_scaffold3518:11357-12226	Known 3'UTR	40	1	11357	40
zgc:101560	ENSDART00000124395 zgc:101560 Zv9_scaffold3518:232509-237916 (-), ENSDART00000104309 zgc:101560 Zv9_scaffold3518:231648-247343 (-)	Zv9_scaffold3518:231648-247343	-	1	Only annotated	1	861	861	Zv9_scaffold3518:231648-232509	Known 3'UTR	44	1	231648	44
LRRN3 (1 of 2)	ENSDART00000124670 LRRN3 (1 of 2) Zv9_scaffold3518:419702-421823 (+), NM_001099658 LRRN3 Zv9_scaffold3518:419732-421277 (+)	Zv9_scaffold3518:419702-421823	+	0	Only extended	5	0	1686	Zv9_scaffold3518:421823-422963	Novel 3'UTR (Extended)	188	5	422504	32	422561	63	422820	6	422953	4	422963	83
CABZ01006178.1	ENSDART00000129935 CABZ01006178.1 Zv9_scaffold3518:500335-503034 (-)	Zv9_scaffold3518:500335-503034	-	0	None associated with 3' UTR	0	0	0
CR354372.1	ENSDART00000130587 CR354372.1 Zv9_scaffold3518:185431-186187 (+)	Zv9_scaffold3518:185431-186187	+	0	No 3P tags	-	0	0
zgc:113098	ENSDART00000127240 zgc:113098 Zv9_scaffold3519:160782-171883 (+), ENSDART00000074703 zgc:113098 Zv9_scaffold3519:166211-172154 (+)	Zv9_scaffold3519:160782-172154	+	1	Annotated and revised	2	256	7200		Known 3'UTR	160	1	172155	160	Novel 3'UTR (Alternative last exon)	14	1	170861	14
CT025651.2	ENSDART00000123772 CT025651.2 Zv9_scaffold3519:71355-80088 (-)	Zv9_scaffold3519:71355-80088	-	0	No 3P tags	-	0	0
CABZ01023255.1	ENSDART00000099838 CABZ01023255.1 Zv9_scaffold3519:183886-189808 (+)	Zv9_scaffold3519:183886-189808	+	0	No 3P tags	-	0	0
CT025651.1	ENSDART00000127121 CT025651.1 Zv9_scaffold3519:120723-139063 (-)	Zv9_scaffold3519:120723-139063	-	0	Only extended	1	0	494	Zv9_scaffold3519:120229-120723	Novel 3'UTR (Extended)	9	1	120229	9
BSPRY (4 of 9)	ENSDART00000122950 BSPRY (4 of 9) Zv9_scaffold3519:179833-180724 (+)	Zv9_scaffold3519:179833-180724	+	0	None associated with 3' UTR	0	0	0
AL929029.1	ENSDART00000130946 AL929029.1 Zv9_scaffold3521:8262-11443 (-), NM_001171537 znf665 Zv9_scaffold3521:9741-11389 (-)	Zv9_scaffold3521:8262-11443	-	1	No 3P tags	-	31	31
vstm2l	ENSDART00000064157 vstm2l Zv9_scaffold3522:53493-61807 (+), NM_001016985 vstm2l Zv9_scaffold3522:58952-60678 (+)	Zv9_scaffold3522:53493-61807	+	1	Only annotated	2	973	945	Zv9_scaffold3522:60834-61779	Known 3'UTR	33	2	61759	16	61779	17
PXMP4	ENSDART00000082893 PXMP4 Zv9_scaffold3522:15597-21328 (+)	Zv9_scaffold3522:15597-21328	+	1	Annotated and revised	6	1880	1880	Zv9_scaffold3522:18900-19643	Known 3'UTR	66	1	21328	66	Novel 3'UTR (Shortened)	501	5	19545	98	19584	17	19616	4	19643	336	19714	46
EPB42	ENSDART00000109821 EPB42 Zv9_scaffold3522:24530-41501 (+), NM_004245 TGM5 Zv9_scaffold3522:30646-32939 (+)	Zv9_scaffold3522:24530-41501	+	1	Annotated and revised	3	171	368	Zv9_scaffold3522:41330-41507	Known 3'UTR	308	1	41507	308	Novel 3'UTR (Extended)	49	2	41698	36	41709	13
FAM36A	ENSDART00000026816 FAM36A Zv9_scaffold3525:60107-65009 (+), NM_001140690 fa36a Zv9_scaffold3525:62078-62352 (+)	Zv9_scaffold3525:60107-65009	+	1	Annotated and revised	4	112	232	Zv9_scaffold3525:64897-65009	Known 3'UTR	1587	3	64979	295	65009	1255	65026	37	Novel 3'UTR (Extended)	6	1	65129	6
lhb	ENSDART00000051787 lhb Zv9_scaffold3525:54870-57837 (-)	Zv9_scaffold3525:54870-57837	-	2	Annotated and revised	2	864	864	Zv9_scaffold3525:54870-55734	Known 3'UTR	101	1	54870	101	Novel 3'UTR (Shortened)	94	1	55300	94
-	ENSDART00000113865 Zv9_scaffold3525:82938-85567 (-)	Zv9_scaffold3525:82932-88329	-	1	Only extended	2	6	568	Zv9_scaffold3525:82760-82938	Novel 3'UTR (Extended)	22	2	82370	7	82760	15
NPTN (2 of 2)	ENSDART00000129419 NPTN (2 of 2) Zv9_scaffold3527:2676-12936 (+)	Zv9_scaffold3527:2676-12936	+	0	No 3P tags	-	0	0
FAM129B (3 of 3)	ENSDART00000122162 FAM129B (3 of 3) Zv9_scaffold3528:88951-109891 (+)	Zv9_scaffold3528:88951-109891	+	0	None associated with 3' UTR	0	0	0
STXBP1 (3 of 3)	NM_214669 sec1 Zv9_scaffold3528:61546-75599 (-), ENSDART00000113495 STXBP1 (3 of 3) Zv9_scaffold3528:58465-84634 (-)	Zv9_scaffold3528:58465-84634	-	1	None associated with 3' UTR	0	51	0
DFNB31 (2 of 3)	ENSDART00000087238 DFNB31 (2 of 3) Zv9_scaffold3528:15342-49399 (+)	Zv9_scaffold3528:15342-49399	+	0	None associated with 3' UTR	0	0	0
BX649556.2	ENSDART00000129545 BX649556.2 Zv9_scaffold3530:36564-43335 (-)	Zv9_scaffold3530:36564-43335	-	0	Only extended	1	0	279	Zv9_scaffold3530:36285-36564	Novel 3'UTR (Extended)	19	1	36285	19
BX649556.3	ENSDART00000106382 BX649556.3 Zv9_scaffold3530:37024-100672 (+)	Zv9_scaffold3530:37024-100672	+	0	None associated with 3' UTR	0	0	0
BX649556.6	ENSDART00000133790 BX649556.6 Zv9_scaffold3530:164059-165199 (+)	Zv9_scaffold3530:164059-165199	+	0	None associated with 3' UTR	0	0	0
BX649556.5	ENSDART00000125488 BX649556.5 Zv9_scaffold3530:141058-153860 (-)	Zv9_scaffold3530:141058-153860	-	0	None associated with 3' UTR	0	0	0
BX908777.1	ENSDART00000099577 BX908777.1 Zv9_scaffold3530:1324357-1348511 (+)	Zv9_scaffold3530:1324357-1348511	+	0	Only extended	1	0	394	Zv9_scaffold3530:1348511-1348905	Novel 3'UTR (Extended)	42	1	1348905	42
BX572103.5	ENSDART00000142711 BX572103.5 Zv9_scaffold3530:784949-801038 (+), NM_001202406 ZNF559 Zv9_scaffold3530:785446-800334 (+)	Zv9_scaffold3530:784949-801038	+	0	None associated with 3' UTR	0	0	0
CT573234.2	ENSDART00000140286 CT573234.2 Zv9_scaffold3530:1425475-1452687 (+)	Zv9_scaffold3530:1425475-1452687	+	0	None associated with 3' UTR	0	0	0
BX088712.3	ENSDART00000123543 BX088712.3 Zv9_scaffold3530:990494-991026 (-)	Zv9_scaffold3530:990494-991026	-	0	None associated with 3' UTR	0	0	0
ZNF251 (16 of 34)	ENSDART00000138839 ZNF251 (16 of 34) Zv9_scaffold3530:686281-695100 (-)	Zv9_scaffold3530:686281-695100	-	0	None associated with 3' UTR	0	0	0
CT573263.1	ENSDART00000123472 CT573263.1 Zv9_scaffold3530:485696-490935 (+)	Zv9_scaffold3530:485696-490935	+	0	No 3P tags	-	0	0
CT573263.3	ENSDART00000148078 CT573263.3 Zv9_scaffold3530:466177-473150 (-), NM_001078504 zf(c2h2)-29 Zv9_scaffold3530:466489-552850 (-)	Zv9_scaffold3530:466177-552850	-	0	Only extended	1	0	922	Zv9_scaffold3530:465567-466177	Novel 3'UTR (Extended)	21	1	465567	21
BX649308.2	ENSDART00000129896 BX649308.2 Zv9_scaffold3530:1182444-1183791 (+)	Zv9_scaffold3530:1182444-1183791	+	0	No 3P tags	-	0	0
BX649556.1	ENSDART00000114843 BX649556.1 Zv9_scaffold3530:170161-172847 (-)	Zv9_scaffold3530:170161-172847	-	0	None associated with 3' UTR	0	0	0
CT573263.2	ENSDART00000133975 CT573263.2 Zv9_scaffold3530:552940-590275 (-)	Zv9_scaffold3530:552940-590275	-	0	No 3P tags	-	0	0
BX572103.2	NM_016324 ZNF274 Zv9_scaffold3530:640083-660469 (+), ENSDART00000125562 BX572103.2 Zv9_scaffold3530:639996-662157 (+)	Zv9_scaffold3530:639996-662157	+	0	None associated with 3' UTR	0	0	0
zgc:174311	ENSDART00000114257 zgc:174311 Zv9_scaffold3530:380114-385643 (+)	Zv9_scaffold3530:380114-385643	+	1	Only annotated	1	1230	1230	Zv9_scaffold3530:384413-385643	Known 3'UTR	10	1	385643	10
CT573234.1	ENSDART00000114594 CT573234.1 Zv9_scaffold3530:1519077-1523778 (-)	Zv9_scaffold3530:1519077-1523778	-	0	No 3P tags	-	0	0
BX649331.2	ENSDART00000136369 BX649331.2 Zv9_scaffold3530:328203-334513 (+)	Zv9_scaffold3530:328203-334513	+	0	Only extended	1	0	141	Zv9_scaffold3530:334513-334654	Novel 3'UTR (Extended)	75	1	334654	75
BX572103.4	ENSDART00000144537 BX572103.4 Zv9_scaffold3530:749599-759503 (+)	Zv9_scaffold3530:749599-759503	+	0	None associated with 3' UTR	0	0	0
BX649331.1	ENSDART00000124473 BX649331.1 Zv9_scaffold3530:303156-309954 (-)	Zv9_scaffold3530:303156-309954	-	0	No 3P tags	-	0	0
BX511215.1	ENSDART00000114889 BX511215.1 Zv9_scaffold3530:1116509-1130252 (-)	Zv9_scaffold3530:1116509-1130252	-	0	No 3P tags	-	0	0
CR936856.1	ENSDART00000099540 CR936856.1 Zv9_scaffold3530:847482-854845 (-)	Zv9_scaffold3530:847482-854845	-	0	No 3P tags	-	0	0
BX908777.2	ENSDART00000138352 BX908777.2 Zv9_scaffold3530:1356243-1357035 (-)	Zv9_scaffold3530:1356243-1357035	-	0	No 3P tags	-	0	0
BX088712.1	ENSDART00000067127 BX088712.1 Zv9_scaffold3530:924794-926549 (-)	Zv9_scaffold3530:924794-926549	-	0	No 3P tags	-	0	0
BX649308.1	ENSDART00000122312 BX649308.1 Zv9_scaffold3530:1294740-1310157 (-)	Zv9_scaffold3530:1294740-1310157	-	0	No 3P tags	-	0	0
BX649556.4	ENSDART00000129123 BX649556.4 Zv9_scaffold3530:191805-220712 (+)	Zv9_scaffold3530:191805-220712	+	0	None associated with 3' UTR	0	0	0
CR361561.2	ENSDART00000122572 CR361561.2 Zv9_scaffold3531:127162-135867 (+)	Zv9_scaffold3531:127162-135867	+	0	None associated with 3' UTR	0	0	0
CR361561.1	ENSDART00000128750 CR361561.1 Zv9_scaffold3531:2407-15441 (-), ENSDART00000123537 CR361561.1 Zv9_scaffold3531:2407-15277 (-), ENSDART00000123582 CR361561.1 Zv9_scaffold3531:2407-15441 (-)	Zv9_scaffold3531:2407-15441	-	0	No 3P tags	-	0	0
CR361561.3	ENSDART00000126532 CR361561.3 Zv9_scaffold3531:108027-192224 (+)	Zv9_scaffold3531:108027-192224	+	0	Only extended	2	0	460	Zv9_scaffold3531:192224-192684	Novel 3'UTR (Extended)	18	2	192509	5	192684	13
ZNF251 (22 of 34)	ENSDART00000124783 ZNF251 (22 of 34) Zv9_scaffold3531:145824-147001 (-)	Zv9_scaffold3531:145824-147001	-	0	None associated with 3' UTR	0	0	0
FP017150.2	ENSDART00000129799 FP017150.2 Zv9_scaffold3532:7898-8876 (+)	Zv9_scaffold3532:7898-8876	+	0	None associated with 3' UTR	0	0	0
FP017150.1	ENSDART00000053522 FP017150.1 Zv9_scaffold3532:14777-37134 (-)	Zv9_scaffold3532:14777-37134	-	0	No 3P tags	-	0	0
BX537120.2	ENSDART00000122129 BX537120.2 Zv9_scaffold3533:5381-6308 (-)	Zv9_scaffold3533:5381-6308	-	0	No 3P tags	-	0	0
BX537120.1	ENSDART00000097503 BX537120.1 Zv9_scaffold3533:203169-221456 (-)	Zv9_scaffold3533:203169-221456	-	0	No 3P tags	-	0	0
TNRC6C (3 of 3)	ENSDART00000112970 TNRC6C (3 of 3) Zv9_scaffold3534:118133-138648 (+)	Zv9_scaffold3534:106134-142951	+	1	None associated with 3' UTR	0	70	0
CABZ01061524.1	ENSDART00000130478 CABZ01061524.1 Zv9_scaffold3535:22211-40366 (+)	Zv9_scaffold3535:22211-40366	+	0	Only extended	2	0	162	Zv9_scaffold3535:40366-40528	Novel 3'UTR (Extended)	671	2	40528	553	40540	118
CSMD1	ENSDART00000059170 CSMD1 Zv9_scaffold3535:176396-231794 (-), ENSDART00000097148 CSMD1 Zv9_scaffold3535:176396-194510 (-)	Zv9_scaffold3535:176396-231794	-	0	Only extended	1	0	3835	Zv9_scaffold3535:172561-176396	Novel 3'UTR (Extended)	384	1	172561	384
zgc:112970	ENSDART00000110036 zgc:112970 Zv9_scaffold3536:197554-203788 (+)	Zv9_scaffold3536:197554-203788	+	1	Only annotated	1	258	258	Zv9_scaffold3536:203530-203788	Known 3'UTR	184	1	203788	184
zgc:174680	ENSDART00000112431 zgc:174680 Zv9_scaffold3536:203601-207814 (-)	Zv9_scaffold3536:203601-207814	-	1	Only annotated	1	148	148	Zv9_scaffold3536:203601-203749	Known 3'UTR	4	1	203601	4
CU182107.1	ENSDART00000135491 CU182107.1 Zv9_scaffold3536:148200-153853 (+)	Zv9_scaffold3536:148200-153853	+	0	Only extended	1	0	478	Zv9_scaffold3536:153853-154331	Novel 3'UTR (Extended)	4	1	154331	4
CABZ01060496.1	ENSDART00000137403 CABZ01060496.1 Zv9_scaffold3536:181525-194307 (+)	Zv9_scaffold3536:181525-194307	+	0	No 3P tags	-	0	0
CABZ01074982.1	ENSDART00000122759 CABZ01074982.1 Zv9_scaffold3536:516-6251 (-)	Zv9_scaffold3536:516-6251	-	0	No 3P tags	-	0	0
CABZ01060490.2	ENSDART00000123885 CABZ01060490.2 Zv9_scaffold3536:290421-299022 (-)	Zv9_scaffold3536:290421-299022	-	0	None associated with 3' UTR	0	0	0
CABZ01060490.1	ENSDART00000125144 CABZ01060490.1 Zv9_scaffold3536:312738-323508 (-)	Zv9_scaffold3536:312738-323508	-	0	No 3P tags	-	0	0
CABZ01060491.1	ENSDART00000127242 CABZ01060491.1 Zv9_scaffold3536:280704-285959 (+)	Zv9_scaffold3536:280704-285959	+	0	No 3P tags	-	0	0
CABZ01060490.3	NM_001099282 ZNF239 Zv9_scaffold3536:307221-308085 (+), ENSDART00000132403 CABZ01060490.3 Zv9_scaffold3536:300969-308313 (+)	Zv9_scaffold3536:300969-308313	+	0	None associated with 3' UTR	0	0	0
wu:fb94b09	ENSDART00000133040 wu:fb94b09 Zv9_scaffold3536:10035-18437 (+)	Zv9_scaffold3536:10035-18437	+	0	No 3P tags	-	0	0
surf4	ENSDART00000097949 surf4 Zv9_scaffold3537:3070-25711 (+)	Zv9_scaffold3537:3070-25711	+	2	Only annotated	2	339	334	Zv9_scaffold3537:25372-25706	Known 3'UTR	5448	2	25706	5326	25717	122
CR391997.1	ENSDART00000126647 CR391997.1 Zv9_scaffold3538:123578-129528 (+)	Zv9_scaffold3538:123578-129528	+	0	Only extended	1	0	473	Zv9_scaffold3538:129528-130001	Novel 3'UTR (Extended)	50	1	130001	50
CR391997.2	ENSDART00000129968 CR391997.2 Zv9_scaffold3538:216299-217880 (+)	Zv9_scaffold3538:216299-217880	+	0	No 3P tags	-	0	0
CABZ01002345.1	ENSDART00000123175 CABZ01002345.1 Zv9_scaffold3538:15734-29519 (-)	Zv9_scaffold3538:15734-29519	-	0	None associated with 3' UTR	0	0	0
CABZ01002339.1	ENSDART00000126159 CABZ01002339.1 Zv9_scaffold3538:69816-72291 (-)	Zv9_scaffold3538:69816-72291	-	0	None associated with 3' UTR	0	0	0
tfec	ENSDART00000049863 tfec Zv9_scaffold3539:166183-180780 (+)	Zv9_scaffold3539:166183-180780	+	1	None associated with 3' UTR	0	57	0
arl1	ENSDART00000021786 arl1 Zv9_scaffold3539:43801-46956 (-)	Zv9_scaffold3539:43801-46956	-	1	Only annotated	2	439	441	Zv9_scaffold3539:43799-44240	Known 3'UTR	10423	2	43775	215	43799	10208
UTP20	ENSDART00000033957 UTP20 Zv9_scaffold3539:191-43587 (+)	Zv9_scaffold3539:191-43587	+	0	Annotated and revised	6	0	170	Zv9_scaffold3539:43587-43757	Known 3'UTR	4	1	43666	4	Novel 3'UTR (Extended)	941	5	43717	27	43747	5	43757	833	43767	19	43792	57
gata6	ENSDART00000051998 gata6 Zv9_scaffold3540:164848-175324 (-), ENSDART00000051999 gata6 Zv9_scaffold3540:164733-174290 (-), ENSDART00000077947 gata6 Zv9_scaffold3540:164848-174242 (-)	Zv9_scaffold3540:164733-175324	-	2	Only annotated	3	583	468	Zv9_scaffold3540:164848-165316	Known 3'UTR	2953	3	164830	305	164848	2641	164863	7
cables1	ENSDART00000089207 cables1 Zv9_scaffold3540:23856-79366 (-)	Zv9_scaffold3540:23856-79366	-	2	Only annotated	1	5058	5058	Zv9_scaffold3540:23856-28914	Known 3'UTR	414	1	23856	414
WAC (2 of 3)	ENSDART00000126869 WAC (2 of 3) Zv9_scaffold3540:3298-7062 (-)	Zv9_scaffold3540:3298-7062	-	0	No 3P tags	-	0	0
MIB1 (1 of 2)	ENSDART00000077966 MIB1 (1 of 2) Zv9_scaffold3540:221355-278892 (-)	Zv9_scaffold3540:221355-278952	-	2	Annotated and revised	3	1437	1451	Zv9_scaffold3540:221341-222792	Known 3'UTR	1073	2	221341	690	221352	383	Novel 3'UTR (Shortened)	10	1	222310	10
CR847893.1	ENSDART00000126638 CR847893.1 Zv9_scaffold3542:101331-114050 (-)	Zv9_scaffold3542:101331-114050	-	0	None associated with 3' UTR	0	0	0
CR847893.4	ENSDART00000142541 CR847893.4 Zv9_scaffold3542:57929-71917 (-)	Zv9_scaffold3542:57929-71917	-	0	None associated with 3' UTR	0	0	0
CR847893.3	ENSDART00000108783 CR847893.3 Zv9_scaffold3542:12073-13236 (-)	Zv9_scaffold3542:12073-13236	-	0	No 3P tags	-	0	0
CR847893.2	ENSDART00000128491 CR847893.2 Zv9_scaffold3542:73514-81624 (+)	Zv9_scaffold3542:73514-81624	+	0	None associated with 3' UTR	0	0	0
KCNIP3 (2 of 2)	ENSDART00000122427 KCNIP3 (2 of 2) Zv9_scaffold3543:4392-16368 (+)	Zv9_scaffold3543:1285-16368	+	0	None associated with 3' UTR	0	0	0
MCOLN2	ENSDART00000023960 MCOLN2 Zv9_scaffold3544:6524-22546 (-), NM_001012059 Mcoln3 Zv9_scaffold3544:13134-20618 (-)	Zv9_scaffold3544:6524-22546	-	0	Only extended	3	0	751	Zv9_scaffold3544:5773-6524	Novel 3'UTR (Extended)	77	3	5773	66	6172	5	12692	6
WDR47 (2 of 2)	ENSDART00000083218 WDR47 (2 of 2) Zv9_scaffold3544:54951-86322 (-), ENSDART00000121497 WDR47 (2 of 2) Zv9_scaffold3544:55619-83817 (-)	Zv9_scaffold3544:54951-86322	-	1	Annotated and revised	3	668	673	Zv9_scaffold3544:54946-55619	Known 3'UTR	398	2	54946	347	55019	51	Novel 3'UTR (Shortened)	23	1	55204	23
CU693480.1	ENSDART00000128854 CU693480.1 Zv9_scaffold3544:43460-51621 (+)	Zv9_scaffold3544:43460-51621	+	0	Only extended	1	0	494	Zv9_scaffold3544:51621-52115	Novel 3'UTR (Extended)	77	1	52115	77
CLCC1	ENSDART00000123465 CLCC1 Zv9_scaffold3544:25029-42233 (-)	Zv9_scaffold3544:25029-42233	-	0	Only extended	2	0	918	Zv9_scaffold3544:24111-25029	Novel 3'UTR (Extended)	301	2	24111	293	24892	8
BX901894.1	ENSDART00000144437 BX901894.1 Zv9_scaffold3545:268822-287038 (+)	Zv9_scaffold3545:268822-287038	+	0	None associated with 3' UTR	0	0	0
BX649303.1	ENSDART00000111352 BX649303.1 Zv9_scaffold3545:153966-162806 (+)	Zv9_scaffold3545:153966-162806	+	0	No 3P tags	-	0	0
CPNE8 (1 of 2)	ENSDART00000127507 CPNE8 (1 of 2) Zv9_scaffold3545:5292-32252 (+), ENSDART00000055274 CPNE8 (1 of 2) Zv9_scaffold3545:5286-107869 (+)	Zv9_scaffold3545:5286-107869	+	0	Only extended	1	0	4385		Novel 3'UTR (Extended)	175	1	112254	175
BX901894.2	ENSDART00000135227 BX901894.2 Zv9_scaffold3545:172858-194556 (-)	Zv9_scaffold3545:172858-194556	-	0	None associated with 3' UTR	0	0	0
zgc:174178	ENSDART00000113571 zgc:174178 Zv9_scaffold3545:217213-243814 (-)	Zv9_scaffold3545:217213-243814	-	1	No 3P tags	-	627	627
ZNF251 (12 of 34)	NM_181266 Zfp120 Zv9_scaffold3547:241700-246333 (-), ENSDART00000122783 ZNF251 (12 of 34) Zv9_scaffold3547:244777-258432 (-)	Zv9_scaffold3547:241700-258432	-	1	Only extended	1	30	487	Zv9_scaffold3547:244290-244777	Novel 3'UTR (Extended)	5	1	244290	5
gchfr	ENSDART00000015230 gchfr Zv9_scaffold3548:229916-235080 (-)	Zv9_scaffold3548:229916-235080	-	1	Annotated and revised	2	403	408	Zv9_scaffold3548:229911-230319	Known 3'UTR	1065	1	229911	1065	Novel 3'UTR (Shortened)	198	1	230062	198
cyp1c2	ENSDART00000016487 cyp1c2 Zv9_scaffold3548:298352-300627 (-), NM_001185032 cyp1c2 Zv9_scaffold3548:299097-300495 (-)	Zv9_scaffold3548:298352-300627	-	0	No 3P tags	-	0	0
dnajc17	ENSDART00000041746 dnajc17 Zv9_scaffold3548:124181-224562 (+), ENSDART00000034165 dnajc17 Zv9_scaffold3548:124108-224603 (+)	Zv9_scaffold3548:124108-224603	+	2	Only Novel 3'UTR (Shortened)	1	782	497		Novel 3'UTR (Shortened)	15	1	178655	15
INF2	ENSDART00000002526 INF2 Zv9_scaffold3548:907-42073 (-)	Zv9_scaffold3548:907-42073	-	0	No 3P tags	-	0	0
CU694219.1	ENSDART00000124284 CU694219.1 Zv9_scaffold3549:77123-101668 (-)	Zv9_scaffold3549:77123-101668	-	0	Annotated and revised	2	0	3640	Zv9_scaffold3549:73483-77123	Known 3'UTR	4	1	77103	4	Novel 3'UTR (Extended)	121	1	73483	121
BX649314.1	ENSDART00000110557 BX649314.1 Zv9_scaffold3551:90205-91755 (+), NM_001097291 plxna1 Zv9_scaffold3551:90672-277893 (+)	Zv9_scaffold3551:90205-277893	+	0	No 3P tags	-	0	0
BX005448.2	ENSDART00000130889 BX005448.2 Zv9_scaffold3552:38476-87907 (+), NM_001101948 ZNF596 Zv9_scaffold3552:41844-87589 (+)	Zv9_scaffold3552:38476-87907	+	0	Only annotated	1	0	90	Zv9_scaffold3552:87907-87997	Known 3'UTR	4	1	87997	4
BX005448.1	ENSDART00000128432 BX005448.1 Zv9_scaffold3552:71928-76398 (-)	Zv9_scaffold3552:71928-76398	-	0	No 3P tags	-	0	0
PIK3CA (2 of 2)	ENSDART00000112973 PIK3CA (2 of 2) Zv9_scaffold3553:105721-134443 (-)	Zv9_scaffold3553:105720-134443	-	1	Only extended	2	1	251	Zv9_scaffold3553:105576-105721	Novel 3'UTR (Extended)	42	2	105470	6	105576	36
CZv9_scaffold3553H3orf21 (2 of 2)	ENSDART00000103304 CZv9_scaffold3553H3orf21 (2 of 2) Zv9_scaffold3553:19048-93431 (-)	Zv9_scaffold3553:19048-93431	-	0	None associated with 3' UTR	0	0	0
zgc:174698	ENSDART00000109212 zgc:174698 Zv9_scaffold3554:274710-281870 (-)	Zv9_scaffold3554:274710-281870	-	0	Only extended	1	0	346	Zv9_scaffold3554:274364-274710	Novel 3'UTR (Extended)	13	1	274364	13
CR847906.6	ENSDART00000139611 CR847906.6 Zv9_scaffold3554:46670-51277 (-)	Zv9_scaffold3554:46670-51277	-	0	No 3P tags	-	0	0
CR792455.1	ENSDART00000124771 CR792455.1 Zv9_scaffold3554:208037-257095 (-)	Zv9_scaffold3554:208025-257095	-	1	None associated with 3' UTR	0	33	0
CABZ01000451.1	NM_001145083 ZNF619 Zv9_scaffold3554:300464-303828 (+), ENSDART00000127446 CABZ01000451.1 Zv9_scaffold3554:291965-304038 (+)	Zv9_scaffold3554:291965-304038	+	0	None associated with 3' UTR	0	0	0
CR847906.1	ENSDART00000129781 CR847906.1 Zv9_scaffold3554:105856-128665 (-)	Zv9_scaffold3554:105856-128665	-	0	Only extended	1	0	889	Zv9_scaffold3554:104967-105856	Novel 3'UTR (Extended)	59	1	104967	59
BX465848.1	ENSDART00000127369 BX465848.1 Zv9_scaffold3555:149501-157097 (+)	Zv9_scaffold3555:149501-157097	+	0	No 3P tags	-	0	0
BX465848.2	ENSDART00000126633 BX465848.2 Zv9_scaffold3555:42090-89208 (+)	Zv9_scaffold3555:42090-89208	+	0	None associated with 3' UTR	0	0	0
BX465848.3	ENSDART00000130738 BX465848.3 Zv9_scaffold3555:142608-163453 (-)	Zv9_scaffold3555:142608-163453	-	0	Only extended	1	0	238	Zv9_scaffold3555:142370-142608	Novel 3'UTR (Extended)	126	1	142370	126
CABZ01072971.1	ENSDART00000129328 CABZ01072971.1 Zv9_scaffold3556:60350-63735 (+)	Zv9_scaffold3556:60350-63735	+	0	No 3P tags	-	0	0
dbx2	ENSDART00000057730 dbx2 Zv9_scaffold3556:4518-13947 (-)	Zv9_scaffold3556:4518-13947	-	0	Only extended	2	0	2082	Zv9_scaffold3556:2436-4518	Novel 3'UTR (Extended)	241	2	2436	197	2838	44
szl	ENSDART00000030667 szl Zv9_scaffold3556:21744-26239 (-), NM_001088521 szl Zv9_scaffold3556:24300-26163 (-)	Zv9_scaffold3556:21744-26239	-	1	Annotated and revised	2	632	1202	Zv9_scaffold3556:21742-22376	Known 3'UTR	482	1	21742	482	Novel 3'UTR (Extended)	7	1	21633	7
RFX7 (2 of 2)	ENSDART00000108633 RFX7 (2 of 2) Zv9_scaffold3556:51594-53691 (+), NM_001097380 rfx7 Zv9_scaffold3556:44989-53931 (+)	Zv9_scaffold3556:44989-53931	+	0	Annotated and revised	4	0	2482	Zv9_scaffold3556:53931-56173	Known 3'UTR	14	1	53935	14	Novel 3'UTR (Extended)	1168	3	54105	9	55896	5	56173	1154
sbno2a	NM_001100122 SBNO2 Zv9_scaffold3557:61931-90965 (+), ENSDART00000074354 sbno2a Zv9_scaffold3557:33658-91198 (+)	Zv9_scaffold3557:33658-91198	+	0	No 3P tags	-	0	0
zgc:85843	ENSDART00000050824 zgc:85843 Zv9_scaffold3557:7492-26638 (-), NM_001127654 Tm6sf2 Zv9_scaffold3557:8152-21225 (-)	Zv9_scaffold3557:7492-26638	-	1	Only annotated	1	588	592	Zv9_scaffold3557:7488-8080	Known 3'UTR	1175	1	7488	1175
PIGB	ENSDART00000028357 PIGB Zv9_scaffold3559:19408-37534 (+)	Zv9_scaffold3559:19408-37534	+	1	Only annotated	2	139	144	Zv9_scaffold3559:37395-37539	Known 3'UTR	367	2	37539	359	37549	8
BX510909.3	ENSDART00000130315 BX510909.3 Zv9_scaffold3560:34046-115165 (-)	Zv9_scaffold3560:34046-115165	-	0	None associated with 3' UTR	0	0	0
BX510909.4	ENSDART00000102945 BX510909.4 Zv9_scaffold3560:2374-4794 (+)	Zv9_scaffold3560:2374-4794	+	0	Only extended	1	0	3014	Zv9_scaffold3560:4794-7808	Novel 3'UTR (Extended)	24	1	7808	24
BX510909.1	ENSDART00000075592 BX510909.1 Zv9_scaffold3560:148262-149744 (-)	Zv9_scaffold3560:148262-149744	-	0	No 3P tags	-	0	0
BX510909.2	NM_001203250 ZNF20 Zv9_scaffold3560:72912-137536 (+), ENSDART00000121650 BX510909.2 Zv9_scaffold3560:72843-137635 (+)	Zv9_scaffold3560:72843-137635	+	0	None associated with 3' UTR	0	0	0
BX276122.3	NM_001016882 znf33b Zv9_scaffold3561:97124-118508 (+), ENSDART00000122802 BX276122.3 Zv9_scaffold3561:108991-120408 (+)	Zv9_scaffold3561:97124-120408	+	1	None associated with 3' UTR	0	33	0
BX276122.1	ENSDART00000130959 BX276122.1 Zv9_scaffold3561:27557-32636 (-), NM_001023561 ZNF749 Zv9_scaffold3561:10683-28016 (-)	Zv9_scaffold3561:10683-32636	-	0	No 3P tags	-	0	0
BX276122.2	ENSDART00000126944 BX276122.2 Zv9_scaffold3561:173744-184762 (-)	Zv9_scaffold3561:173744-184762	-	0	No 3P tags	-	0	0
rab3ip	ENSDART00000059404 rab3ip Zv9_scaffold3562:17221-54526 (+)	Zv9_scaffold3562:17221-54526	+	1	Annotated and revised	3	381	388	Zv9_scaffold3562:54145-54533	Known 3'UTR	1423	2	54533	1414	54543	9	Novel 3'UTR (Shortened)	717	1	54352	717
CZv9_scaffold3562H12orf28	ENSDART00000059397 CZv9_scaffold3562H12orf28 Zv9_scaffold3562:68376-120468 (+), NM_001102323 C5H12orf28 Zv9_scaffold3562:68376-93619 (+)	Zv9_scaffold3562:68376-120468	+	0	Only extended	1	0	315	Zv9_scaffold3562:120468-120783	Novel 3'UTR (Extended)	24	1	120783	24
sh3bp5	ENSDART00000012414 sh3bp5 Zv9_scaffold3563:195806-232099 (-), NM_001018009 SH3BP5 Zv9_scaffold3563:197348-230486 (-)	Zv9_scaffold3563:195806-232099	-	1	Only annotated	3	1353	1353	Zv9_scaffold3563:195806-197159	Known 3'UTR	2309	3	195795	188	195806	2106	195817	15
MRPS15	ENSDART00000128936 MRPS15 Zv9_scaffold3563:240876-261913 (+), NM_001201216 pl8l1 Zv9_scaffold3563:260952-261614 (+), NM_001192201 MRPS15 Zv9_scaffold3563:256460-256646 (+)	Zv9_scaffold3563:240876-261913	+	2	Annotated and revised	6	1640	1836	Zv9_scaffold3563:259003-259172	Known 3'UTR	436	2	261913	320	261925	116	Novel 3'UTR (Extended)	99	2	263409	22	263460	77	Novel 3'UTR (Shortened)	4067	2	259156	14	259172	4053
CAPN7	ENSDART00000043112 CAPN7 Zv9_scaffold3563:162371-191165 (+)	Zv9_scaffold3563:162371-191165	+	1	Annotated and revised	4	1853	1853	Zv9_scaffold3563:189312-191107	Known 3'UTR	536	3	191107	396	191165	102	191180	38	Novel 3'UTR (Shortened)	35	1	190622	35
OSCP1 (1 of 2)	ENSDART00000114729 OSCP1 (1 of 2) Zv9_scaffold3563:265295-282999 (+), ENSDART00000113225 OSCP1 (1 of 2) Zv9_scaffold3563:265295-282999 (+)	Zv9_scaffold3563:265295-282999	+	0	Only extended	6	0	1180	Zv9_scaffold3563:282999-284058	Novel 3'UTR (Extended)	186	6	283144	13	283909	13	283968	4	284058	129	284074	20	284179	7
CABZ01065723.1	ENSDART00000126527 CABZ01065723.1 Zv9_scaffold3563:294732-295316 (+)	Zv9_scaffold3563:294732-295316	+	0	No 3P tags	-	0	0
FBXO16 (2 of 2)	ENSDART00000099775 FBXO16 (2 of 2) Zv9_scaffold3564:130268-137112 (-), NM_001013132 Fbxo16 Zv9_scaffold3564:132737-136756 (-)	Zv9_scaffold3564:130268-137112	-	1	Only annotated	1	443	436	Zv9_scaffold3564:130275-130711	Known 3'UTR	6	1	130275	6
FAM49A (1 of 2)	ENSDART00000062791 FAM49A (1 of 2) Zv9_scaffold3564:88052-129500 (-)	Zv9_scaffold3564:88052-129500	-	2	Only annotated	1	521	620	Zv9_scaffold3564:87953-88573	Known 3'UTR	462	1	87953	462
zgc:194906	ENSDART00000111614 zgc:194906 chr1:59128093-59136372 (-)	chr1:59128093-59136372	-	1	None associated with 3' UTR	0	25	0
coro2a	ENSDART00000011645 coro2a chr1:25571326-25620378 (+)	chr1:25571326-25620378	+	1	Annotated and revised	5	1057	1377	chr1:25619321-25620378	Known 3'UTR	715	2	25620378	683	25620437	32	Novel 3'UTR (Extended)	92	1	25620698	92	Novel 3'UTR (Shortened)	29	2	25619705	4	25619985	25
rgs11	ENSDART00000135702 rgs11 chr1:8963074-8990323 (+), ENSDART00000054829 rgs11 chr1:8963110-8990308 (+)	chr1:8963074-8990323	+	0	Only extended	2	0	408		Novel 3'UTR (Extended)	225	2	8990651	67	8990716	158
AL935184.1	ENSDART00000121673 AL935184.1 chr1:24565017-24566450 (+)	chr1:24565017-24566450	+	1	Only annotated	1	133	163	chr1:24566317-24566480	Known 3'UTR	4	1	24566480	4
si:ch73-343l4.6	ENSDART00000138446 si:ch73-343l4.6 chr1:56433239-56435396 (+), ENSDART00000032177 si:ch73-343l4.6 chr1:56416612-56435399 (+)	chr1:56416612-56435399	+	0	Only extended	1	0	294		Novel 3'UTR (Extended)	18	1	56435690	18
CHST12 (5 of 7)	ENSDART00000134588 CHST12 (5 of 7) chr1:10807374-10812757 (-)	chr1:10807374-10812757	-	0	Only extended	1	0	339	chr1:10807035-10807374	Novel 3'UTR (Extended)	15	1	10807035	15
atp5j	ENSDART00000004062 atp5j chr1:485023-489280 (-), ENSDART00000147937 atp5j chr1:485385-489289 (-), ENSDART00000146351 atp5j chr1:485389-489289 (-), ENSDART00000134456 atp5j chr1:484778-489335 (-)	chr1:484778-489335	-	3	Annotated and revised	5	819	1211		Known 3'UTR	8147	2	485025	306	485388	7841	Novel 3'UTR (Extended)	106	2	484621	16	484631	90	Novel 3'UTR (Shortened)	34	1	485249	34
CU302202.7	ENSDART00000124611 CU302202.7 chr1:58226965-58243277 (+), ENSDART00000121467 CU302202.7 chr1:58227320-58243277 (+)	chr1:58226965-58243277	+	0	None associated with 3' UTR	0	0	0
C1H11orf73	ENSDART00000059341 C1H11orf73 chr1:576789-579246 (-)	chr1:576789-579246	-	2	Only annotated	2	155	155	chr1:576789-576944	Known 3'UTR	6659	2	576771	54	576789	6605
FRG1	ENSDART00000079001 FRG1 chr1:15417525-15430769 (-)	chr1:15417523-15430769	-	1	Only extended	6	2	774	chr1:15416950-15417525	Novel 3'UTR (Extended)	1867	6	15416751	4	15416848	26	15416940	18	15416950	1705	15416973	67	15417158	47
RASD2 (1 of 2)	ENSDART00000034898 RASD2 (1 of 2) chr1:57737781-57741410 (+)	chr1:57737781-57741410	+	1	Only annotated	1	1652	1652	chr1:57739758-57741410	Known 3'UTR	164	1	57741410	164
si:dkey-117m1.3	ENSDART00000147317 si:dkey-117m1.3 chr1:40487640-40495354 (-), ENSDART00000109096 si:dkey-117m1.3 chr1:40488010-40495091 (-)	chr1:40487640-40495354	-	1	Only revised	2	370	3278	chr1:40484732-40488010	Novel 3'UTR (Extended)	430	1	40484732	430	Novel 3'UTR (Shortened)	166	1	40487752	166
qdprb1	ENSDART00000054386 qdprb1 chr1:21619318-21625575 (-)	chr1:21619318-21625575	-	1	Annotated and revised	5	245	1077	chr1:21619408-21619563	Known 3'UTR	661	2	21619315	328	21619408	333	Novel 3'UTR (Extended)	27	2	21618486	10	21618829	17	Novel 3'UTR (Shortened)	24	1	21619456	24
bactin1	ENSDART00000138324 bactin1 chr1:7726279-7728732 (-), ENSDART00000054987 bactin1 chr1:7725182-7728816 (-), ENSDART00000133319 bactin1 chr1:7725987-7727802 (-)	chr1:7725182-7728816	-	1	Only annotated	1	504	498		Known 3'UTR	81424	1	7725188	81424
khsrp	ENSDART00000038330 khsrp chr1:55499598-55511646 (-), ENSDART00000140016 khsrp chr1:55506801-55511378 (-)	chr1:55499598-55511646	-	1	Annotated and revised	8	912	1149		Known 3'UTR	4702	5	55499533	19	55499585	39	55499604	4442	55499614	190	55499661	12	Novel 3'UTR (Extended)	176	2	55499361	115	55499376	61	Novel 3'UTR (Shortened)	6	1	55499779	6
si:ch211-15j1.1;si:dkey-222h21.11	ENSDART00000147397 si:dkey-222h21.11 chr1:58868838-58883771 (+), ENSDART00000144784 si:ch211-15j1.1 chr1:58868821-58870199 (+), ENSDART00000146252 si:dkey-222h21.11 chr1:58880637-58881270 (+)	chr1:58868821-58883771	+	0	None associated with 3' UTR	0	0	0
FNIP2	ENSDART00000138276 FNIP2 chr1:18506889-18544497 (+), ENSDART00000112490 FNIP2 chr1:18520571-18544497 (+)	chr1:18506889-18544497	+	0	Only extended	5	0	2806	chr1:18544497-18547303	Novel 3'UTR (Extended)	493	5	18544947	6	18545082	90	18546722	33	18546736	12	18547303	352
elf2b	ENSDART00000011414 elf2b chr1:12841964-12860838 (-), ENSDART00000103383 elf2b chr1:12841964-12852898 (-)	chr1:12841964-12860838	-	1	Annotated and revised	6	1062	1062	chr1:12841964-12843026	Known 3'UTR	2572	1	12841964	2572	Novel 3'UTR (Shortened)	121	5	12842445	21	12842598	18	12842813	6	12842835	66	12842847	10
MDH1B	ENSDART00000141653 MDH1B chr1:5082291-5088945 (-), ENSDART00000103710 MDH1B chr1:5082383-5088944 (-)	chr1:5082291-5088945	-	2	Only annotated	2	156	149	chr1:5082379-5082447	Known 3'UTR	2473	2	5082298	774	5082379	1699
cnn1a	ENSDART00000010236 cnn1a chr1:52709820-52717915 (-)	chr1:52709820-52717915	-	0	Only extended	1	0	3742	chr1:52706078-52709820	Novel 3'UTR (Extended)	54	1	52706078	54
SLC9A3R2 (3 of 3)	ENSDART00000080385 SLC9A3R2 (3 of 3) chr1:54706626-54728998 (+)	chr1:54706626-54728998	+	0	Only extended	5	0	3307	chr1:54728998-54730249	Novel 3'UTR (Extended)	265	5	54729106	9	54729148	22	54730249	171	54730278	12	54732305	51
uso1	ENSDART00000011809 uso1 chr1:25349780-25390224 (+), ENSDART00000137492 uso1 chr1:25363477-25380594 (+), ENSDART00000112329 uso1 chr1:25349658-25390732 (+), ENSDART00000140976 uso1 chr1:25349669-25363294 (+)	chr1:25349658-25390732	+	2	Annotated and revised	4	879	1048		Known 3'UTR	224	2	25390224	36	25390725	188	Novel 3'UTR (Extended)	86	1	25390901	86	Novel 3'UTR (Shortened)	61	1	25390113	61
si:dkey-29d5.1	ENSDART00000142017 si:dkey-29d5.1 chr1:26679448-26699248 (+)	chr1:26679448-26699248	+	1	None associated with 3' UTR	0	333	0
CENPE	ENSDART00000148172 CENPE chr1:141725-144574 (+), ENSDART00000092584 CENPE chr1:134729-170746 (+), ENSDART00000111806 CENPE chr1:134729-170748 (+), ENSDART00000148261 CENPE chr1:167235-170748 (+), ENSDART00000133431 CENPE chr1:152421-154950 (+)	chr1:134729-170748	+	1	Annotated and revised	5	344	342		Known 3'UTR	303	1	170746	303	Novel 3'UTR (Shortened)	807	4	170515	708	170554	12	170574	61	170614	26
si:ch211-163g19.2	ENSDART00000135159 si:ch211-163g19.2 chr1:36155612-36180900 (-)	chr1:36155612-36180900	-	0	None associated with 3' UTR	0	0	0
zgc:194443	ENSDART00000074953 zgc:194443 chr1:40541262-40542933 (+), ENSDART00000138072 zgc:194443 chr1:40540710-40542336 (+)	chr1:40540710-40542933	+	1	Only annotated	3	94	158		Known 3'UTR	20	3	40542850	5	40542937	5	40542997	10
CD97 (3 of 3)	ENSDART00000109528 CD97 (3 of 3) chr1:59439204-59469619 (-)	chr1:59439204-59469619	-	1	Annotated and revised	2	2236	2408	chr1:59439200-59441440	Known 3'UTR	415	1	59439200	415	Novel 3'UTR (Extended)	4	1	59439032	4
NLRX1 (8 of 41)	ENSDART00000147654 NLRX1 (8 of 41) chr1:37752949-37758646 (+)	chr1:37752949-37758646	+	0	None associated with 3' UTR	0	0	0
gtf3c3	ENSDART00000127329 gtf3c3 chr1:5125554-5136072 (+), NM_001006515 GTF3C3 chr1:5107775-5135687 (+)	chr1:5107775-5136072	+	1	Only annotated	1	77	77	chr1:5135995-5136072	Known 3'UTR	1887	1	5136072	1887
msxb	NM_204559 MSX2 chr1:49860739-49861016 (+), ENSDART00000008468 msxb chr1:49859333-49861712 (+)	chr1:49859333-49861712	+	1	Annotated and revised	4	561	2298	chr1:49861151-49861622	Known 3'UTR	697	2	49861622	691	49861705	6	Novel 3'UTR (Extended)	6	1	49863314	6	Novel 3'UTR (Shortened)	5	1	49861338	5
frem3	ENSDART00000114228 frem3 chr1:35322204-35361833 (-), ENSDART00000142154 frem3 chr1:35322203-35361675 (-)	chr1:35322203-35361833	-	1	Annotated and revised	9	578	3680	chr1:35322204-35322781	Known 3'UTR	137	2	35322204	124	35322246	13	Novel 3'UTR (Extended)	216	7	35319101	6	35319156	20	35319399	25	35319734	88	35320987	42	35321022	9	35321577	26
2012-03-01	ENSDART00000131206 march1 chr1:18450402-18498254 (+), ENSDART00000054581 march1 chr1:18450402-18498132 (+)	chr1:18450402-18498254	+	1	Only extended	4	122	4332	chr1:18498132-18502464	Novel 3'UTR (Extended)	201	4	18502351	5	18502365	7	18502464	180	18502475	9
CABZ01035189.1	NM_168751 CG32188 chr1:52866267-52869856 (+), ENSDART00000128834 CABZ01035189.1 chr1:52838164-52866695 (+), NM_001103783 CG34220 chr1:52840773-52864560 (+)	chr1:52838164-52869856	+	0	Only extended	1	0	4053	chr1:52869856-52877803	Novel 3'UTR (Extended)	38	1	52877803	38
pspc1	ENSDART00000102335 pspc1 chr1:26774853-26830272 (+)	chr1:26774853-26830272	+	1	Annotated and revised	13	420	2490	chr1:26829852-26830272	Known 3'UTR	1137	4	26830262	126	26830272	676	26830310	317	26830324	18	Novel 3'UTR (Extended)	100	5	26830730	20	26830755	6	26831452	57	26831533	7	26832342	10	Novel 3'UTR (Shortened)	249	4	26830050	12	26830057	2	26830132	232	26830138	3
crfb17	ENSDART00000114506 crfb17 chr1:54409098-54430062 (+)	chr1:54409098-54430062	+	1	Only Novel 3'UTR (Shortened)	1	520	29	chr1:54429542-54429571	Novel 3'UTR (Shortened)	4	1	54429571	4
eef1a1	ENSDART00000075340 eef1a1 chr1:30168739-30186478 (+), ENSDART00000137863 eef1a1 chr1:30167073-30186479 (+)	chr1:30167073-30186479	+	1	Only annotated	2	639	638	chr1:30185840-30186478	Known 3'UTR	3733	2	30186478	3702	30186495	31
EFNB2 (2 of 3)	ENSDART00000023180 EFNB2 (2 of 3) chr1:6774235-6799314 (+)	chr1:6774235-6799314	+	0	Only extended	1	0	2454	chr1:6799314-6801768	Novel 3'UTR (Extended)	239	1	6801768	239
zgc:152658	ENSDART00000101640 zgc:152658 chr1:40533015-40539300 (+)	chr1:40533015-40539300	+	1	Annotated and revised	2	1745	1744	chr1:40537555-40539299	Known 3'UTR	5	1	40539299	5	Novel 3'UTR (Shortened)	4	1	40538576	4
si:ch211-114l13.4	ENSDART00000115190 si:ch211-114l13.4 chr1:58754735-58775306 (+), ENSDART00000141678 si:ch211-114l13.4 chr1:58754150-58755641 (+)	chr1:58754150-58775306	+	0	None associated with 3' UTR	0	0	0
TSGA10	ENSDART00000108894 TSGA10 chr1:50159398-50180278 (+), ENSDART00000074380 TSGA10 chr1:50157414-50180405 (+), ENSDART00000135487 TSGA10 chr1:50179887-50180403 (+), ENSDART00000101017 TSGA10 chr1:50157420-50180402 (+)	chr1:50157414-50180405	+	1	Only annotated	1	118	117		Known 3'UTR	812	1	50180404	812
c3a	ENSDART00000024624 c3a chr1:56677111-56723732 (-), ENSDART00000052688 c3a chr1:56676992-56723747 (-)	chr1:56676992-56723747	-	1	Annotated and revised	3	119	409	chr1:56676993-56677111	Known 3'UTR	4090	2	56676993	3740	56677017	350	Novel 3'UTR (Extended)	15	1	56676702	15
tmem154	ENSDART00000144711 tmem154 chr1:24011475-24034486 (-), ENSDART00000112120 tmem154 chr1:24022659-24034451 (-)	chr1:24011475-24034486	-	2	Annotated and revised	3	599	2433	chr1:24009641-24022676	Known 3'UTR	153	1	24011458	153	Novel 3'UTR (Extended)	1614	2	24009641	1600	24009839	14
tbc1d1	ENSDART00000133194 tbc1d1 chr1:17387242-17514136 (-), ENSDART00000089328 tbc1d1 chr1:17443808-17514136 (-), ENSDART00000147525 tbc1d1 chr1:17387242-17514136 (-), ENSDART00000089294 tbc1d1 chr1:17388492-17494282 (-), ENSDART00000147645 tbc1d1 chr1:17387242-17514136 (-)	chr1:17387242-17514136	-	2	Annotated and revised	6	1250	1302		Known 3'UTR	911	4	17387190	4	17387229	10	17387240	842	17388475	55	Novel 3'UTR (Shortened)	110	2	17388286	106	17388299	4
c3b	ENSDART00000019644 c3b chr1:56776458-56813305 (+), ENSDART00000127714 c3b chr1:56777739-56813502 (+)	chr1:56776458-56813502	+	1	Only annotated	6	197	174	chr1:56813305-56813479	Known 3'UTR	495	6	56813385	170	56813395	14	56813433	44	56813448	8	56813479	210	56813495	49
RBM47	ENSDART00000089070 RBM47 chr1:18094950-18111256 (-), ENSDART00000135552 RBM47 chr1:18094942-18144697 (-)	chr1:18094942-18144697	-	1	Annotated and revised	5	5051	5043	chr1:18094950-18099993	Known 3'UTR	1105	1	18094950	1105	Novel 3'UTR (Shortened)	41	4	18095103	17	18095180	11	18095251	4	18095291	9
BX469930.3	ENSDART00000125082 BX469930.3 chr1:58626843-58627400 (+)	chr1:58626843-58627400	+	0	Only extended	1	0	129	chr1:58627400-58627529	Novel 3'UTR (Extended)	18	1	58627529	18
zgc:153642	ENSDART00000093269 zgc:153642 chr1:41130700-41132161 (-)	chr1:41130700-41132161	-	1	Only annotated	2	591	591	chr1:41130764-41131291	Known 3'UTR	10	2	41130700	5	41130764	5
CACNG3 (2 of 2)	ENSDART00000055023 CACNG3 (2 of 2) chr1:8158500-8168019 (+), ENSDART00000146303 CACNG3 (2 of 2) chr1:8158500-8167743 (+)	chr1:8158500-8168019	+	0	Only annotated	1	0	66		Known 3'UTR	13	1	8168085	13
zdhhc5a	ENSDART00000147702 zdhhc5a chr1:44978993-45021911 (+), ENSDART00000003497 zdhhc5a chr1:44995770-45021903 (+), ENSDART00000149764 zdhhc5a chr1:45009582-45015040 (+)	chr1:44978993-45021911	+	1	Annotated and revised	3	1378	1377		Known 3'UTR	240	1	45021910	240	Novel 3'UTR (Shortened)	31	2	45021198	19	45021325	12
RAPH1 (1 of 2)	ENSDART00000125402 RAPH1 (1 of 2) chr1:28661099-28664085 (+), ENSDART00000136066 RAPH1 (1 of 2) chr1:28687082-28688709 (+), NM_001006357 APBB1IP chr1:28677376-28683233 (+), ENSDART00000088290 RAPH1 (1 of 2) chr1:28609575-28688880 (+)	chr1:28609575-28688880	+	2	Only annotated	1	1313	1307		Known 3'UTR	1596	1	28688874	1596
si:ch211-165a10.5	ENSDART00000134960 si:ch211-165a10.5 chr1:44490452-44493075 (-)	chr1:44490452-44493075	-	0	No 3P tags	-	0	0
ccdc147	ENSDART00000101066 ccdc147 chr1:48329044-48509475 (+), ENSDART00000110335 ccdc147 chr1:48328725-48473713 (+)	chr1:48328725-48509475	+	0	Only extended	2	0	198		Novel 3'UTR (Extended)	1055	2	48509648	91	48509673	964
si:dkey-167i21.2	ENSDART00000142026 si:dkey-167i21.2 chr1:17552785-17553412 (-)	chr1:17552785-17553412	-	1	Only annotated	2	132	130	chr1:17552787-17552917	Known 3'UTR	161510	2	17552787	161466	17552801	44
si:ch211-196h16.5	ENSDART00000145381 si:ch211-196h16.5 chr1:55410114-55411898 (+), ENSDART00000100657 si:ch211-196h16.5 chr1:55405077-55428911 (+)	chr1:55405077-55428911	+	1	Annotated and revised	5	1005	1005		Known 3'UTR	392	3	55428832	97	55428861	4	55428911	291	Novel 3'UTR (Shortened)	27	2	55428329	6	55428741	21
CDC37	ENSDART00000058692 CDC37 chr1:59998109-60060115 (+), NM_133541 Gtf3c1 chr1:60041153-60058294 (+)	chr1:59998109-60060115	+	0	Only extended	1	0	305	chr1:60060115-60060420	Novel 3'UTR (Extended)	6102	1	60060420	6102
arfip1	ENSDART00000102501 arfip1 chr1:24300098-24343971 (-), ENSDART00000141892 arfip1 chr1:24300115-24343927 (-), ENSDART00000134200 arfip1 chr1:24303909-24343871 (-), ENSDART00000125686 arfip1 chr1:24298451-24337038 (-)	chr1:24298451-24343971	-	2	Annotated and revised	6	2015	2015		Known 3'UTR	1385	2	24298441	7	24298451	1378	Novel 3'UTR (Shortened)	365	4	24298557	57	24298769	20	24299888	14	24299910	274
MFAP4 (5 of 12)	ENSDART00000130791 MFAP4 (5 of 12) chr1:59828399-59829577 (+), ENSDART00000149937 MFAP4 (5 of 12) chr1:59828264-59829489 (+)	chr1:59828264-59829577	+	0	Only extended	2	0	236		Novel 3'UTR (Extended)	202	2	59829709	29	59829725	173
CASKIN1 (3 of 3)	ENSDART00000146756 CASKIN1 (3 of 3) chr1:6870158-6880301 (+)	chr1:6870158-6880301	+	0	Only extended	1	0	1552	chr1:6880301-6883416	Novel 3'UTR (Extended)	5	1	6883416	5
ENDOD1 (2 of 10)	ENSDART00000109218 ENDOD1 (2 of 10) chr1:7691936-7694395 (-)	chr1:7691936-7694395	-	0	None associated with 3' UTR	0	0	0
sh3d19	ENSDART00000126950 sh3d19 chr1:23169029-23237548 (-), ENSDART00000140197 sh3d19 chr1:23187024-23232914 (-)	chr1:23169029-23237548	-	1	Annotated and revised	3	147	347		Known 3'UTR	778	1	23169025	778	Novel 3'UTR (Extended)	139	2	23168829	50	23168881	89
neurla	ENSDART00000101079 neurla chr1:48199030-48268849 (-)	chr1:48199030-48268849	-	1	Only extended	6	2052	6856	chr1:48194226-48201082	Novel 3'UTR (Extended)	546	6	48194226	519	48194676	6	48196686	4	48197979	7	48197995	4	48198415	6
zgc:112980	ENSDART00000135197 zgc:112980 chr1:7625932-7629249 (-), ENSDART00000054981 zgc:112980 chr1:7615754-7629379 (-)	chr1:7615754-7629379	-	1	Annotated and revised	3	415	412		Known 3'UTR	772	2	7615757	390	7615813	382	Novel 3'UTR (Shortened)	3031	1	7615984	3031
FSCN1 (2 of 2)	ENSDART00000054989 FSCN1 (2 of 2) chr1:7738604-7744286 (+)	chr1:7738604-7744286	+	0	Only extended	1	0	2284	chr1:7744286-7746570	Novel 3'UTR (Extended)	956	1	7746570	956
STX3 (2 of 2)	ENSDART00000146962 STX3 (2 of 2) chr1:45281844-45291216 (+), ENSDART00000108875 STX3 (2 of 2) chr1:45281793-45290723 (+)	chr1:45281793-45291216	+	2	Only extended	2	613	4325		Novel 3'UTR (Extended)	633	2	45293669	13	45293990	620
scoc	ENSDART00000135578 scoc chr1:40959515-40961268 (+), ENSDART00000122059 scoc chr1:40955057-40962131 (+), ENSDART00000137047 scoc chr1:40959495-40961345 (+)	chr1:40955057-40962131	+	3	Annotated and revised	18	1261	4397	chr1:40960870-40965267	Known 3'UTR	15	3	40961254	5	40961440	4	40962195	6	Novel 3'UTR (Extended)	1717	10	40962242	61	40962311	24	40962435	37	40962578	3	40962616	47	40963338	5	40963574	29	40963809	26	40965267	1457	40965301	28	Novel 3'UTR (Shortened)	163	5	40960980	133	40961066	8	40961088
UBAC2 (1 of 2)	ENSDART00000085514 UBAC2 (1 of 2) chr1:29595192-29624482 (-), ENSDART00000140806 UBAC2 (1 of 2) chr1:29595181-29624482 (-)	chr1:29595181-29624482	-	1	Only revised	7	543	2037	chr1:29593845-29595724	Novel 3'UTR (Extended)	54	3	29593687	13	29593845	36	29594079	5	Novel 3'UTR (Shortened)	41	4	29595340	4	29595355	4	29595642	11	29595693	22
EIF3F	ENSDART00000115195 EIF3F chr1:9473156-9480141 (+)	chr1:9473156-9480141	+	1	Only annotated	1	38	40	chr1:9480103-9480143	Known 3'UTR	22465	1	9480143	22465
slc2a15b	ENSDART00000075286 slc2a15b chr1:31027196-31052389 (+), NM_001127842 slc2a9-a chr1:31030700-31052035 (+)	chr1:31027196-31052389	+	1	Annotated and revised	4	210	506	chr1:31052179-31052379	Known 3'UTR	429	3	31052379	273	31052391	131	31052458	25	Novel 3'UTR (Extended)	22	1	31052541	22
adamtsl7	ENSDART00000148327 adamtsl7 chr1:20359325-20381871 (-), ENSDART00000077833 adamtsl7 chr1:20359324-20375363 (-)	chr1:20359324-20381871	-	1	Annotated and revised	2	204	1922	chr1:20359324-20359528	Known 3'UTR	137	1	20359324	137	Novel 3'UTR (Extended)	5	1	20357606	5
si:ch211-76m11.12	ENSDART00000149509 si:ch211-76m11.12 chr1:37572158-37576112 (+)	chr1:37572158-37576112	+	1	No 3P tags	-	227	227
si:ch211-281g13.5	ENSDART00000113315 si:ch211-281g13.5 chr1:50031494-50037014 (-)	chr1:50031494-50037014	-	1	Annotated and revised	4	109	763	chr1:50030840-50031603	Known 3'UTR	19	3	50031462	4	50031478	6	50031545	9	Novel 3'UTR (Extended)	297	1	50030840	297
trappc5	ENSDART00000038574 trappc5 chr1:46134419-46140137 (+), ENSDART00000149565 trappc5 chr1:46134499-46139728 (+), ENSDART00000141144 trappc5 chr1:46134462-46139697 (+)	chr1:46134419-46140137	+	3	Only annotated	3	540	530	chr1:46139597-46140127	Known 3'UTR	1144	3	46139792	4	46140094	5	46140127	1135
lbx1b	ENSDART00000007770 lbx1b chr1:30985961-30988061 (-), ENSDART00000123968 lbx1b chr1:30985702-30988061 (-)	chr1:30985702-30988061	-	1	Annotated and revised	2	570	579		Known 3'UTR	7	1	30985952	7	Novel 3'UTR (Shortened)	152	1	30986079	152
CT826376.1	ENSDART00000079359 CT826376.1 chr1:13141902-13161637 (-)	chr1:13141902-13161637	-	0	Only extended	3	0	439	chr1:13141463-13141902	Novel 3'UTR (Extended)	19	3	13141463	6	13141481	4	13141617	9
si:dkey-222h21.3	ENSDART00000145743 si:dkey-222h21.3 chr1:59010349-59011004 (+)	chr1:59010349-59011004	+	0	No 3P tags	-	0	0
b4galt1	ENSDART00000109161 b4galt1 chr1:11440984-11457325 (-), ENSDART00000054801 b4galt1 chr1:11437845-11457518 (-), ENSDART00000103445 b4galt1 chr1:11441452-11457519 (-), ENSDART00000149913 b4galt1 chr1:11440943-11457519 (-), ENSDART00000011977 b4galt1 chr1:11438246-11457519 (-)	chr1:11437845-11457519	-	2	Annotated and revised	5	401	4177		Known 3'UTR	93	2	11437771	4	11437833	89	Novel 3'UTR (Extended)	68	3	11436945	8	11437270	24	11437711	36
LUC7L2	ENSDART00000100619 LUC7L2 chr1:55708457-55722416 (-), NM_001016024 luc7l2 chr1:55714104-55721908 (-)	chr1:55708457-55722416	-	1	Annotated and revised	3	1936	1936	chr1:55708457-55710393	Known 3'UTR	3144	1	55708457	3144	Novel 3'UTR (Shortened)	894	2	55708759	863	55709990	31
abcg2d	ENSDART00000146892 abcg2d chr1:51073338-51097709 (-), ENSDART00000022733 abcg2d chr1:51075220-51097709 (-)	chr1:51073338-51097709	-	1	Only extended	3	126	1280		Novel 3'UTR (Extended)	153	3	51072170	50	51072184	99	51073094	4
slit2	ENSDART00000007531 slit2 chr1:22557442-22684130 (+), NM_003061 SLIT1 chr1:22559046-22677130 (+)	chr1:22557442-22684130	+	1	Only annotated	1	1331	1334	chr1:22682799-22684133	Known 3'UTR	4171	1	22684133	4171
si:ch211-157h5.5	ENSDART00000141795 si:ch211-157h5.5 chr1:17816220-17821852 (-), ENSDART00000110517 si:ch211-157h5.5 chr1:17816348-17820526 (-)	chr1:17816220-17821852	-	1	Annotated and revised	2	128	601	chr1:17816218-17816348	Known 3'UTR	8	1	17816218	8	Novel 3'UTR (Extended)	7	1	17815747	7
lmo7b	ENSDART00000140515 lmo7b chr1:33999529-34080196 (-), ENSDART00000083736 lmo7b chr1:34061002-34083303 (-), ENSDART00000075577 lmo7b chr1:33999531-34080241 (-), ENSDART00000143048 lmo7b chr1:33999529-34080196 (-)	chr1:33999529-34083303	-	2	Annotated and revised	5	453	1459		Known 3'UTR	576	2	33999531	484	33999543	92	Novel 3'UTR (Extended)	304	2	33998523	6	33999047	298	Novel 3'UTR (Shortened)	7	1	33999669	7
CU928072.1	ENSDART00000127426 CU928072.1 chr1:6299147-6332454 (+), NM_001095593 erbb2 chr1:6298681-6328532 (+)	chr1:6298681-6332454	+	0	Only extended	2	0	7902	chr1:6332454-6340356	Novel 3'UTR (Extended)	17	2	6339995	8	6340356	9
KLHL2	ENSDART00000088545 KLHL2 chr1:19713355-19751570 (-)	chr1:19713355-19751570	-	2	Only extended	3	522	1352	chr1:19712525-19713877	Novel 3'UTR (Extended)	431	3	19712525	342	19712804	20	19712918	69
scpp9	ENSDART00000148719 scpp9 chr1:44352316-44355479 (-), ENSDART00000129813 scpp9 chr1:44352319-44355588 (-)	chr1:44352316-44355588	-	1	Only annotated	1	325	322	chr1:44352319-44352641	Known 3'UTR	30	1	44352319	30
si:ch211-243a20.3	ENSDART00000145486 si:ch211-243a20.3 chr1:45822582-45837115 (+)	chr1:45822582-45837115	+	1	Only annotated	1	256	279	chr1:45836859-45837138	Known 3'UTR	110	1	45837138	110
CABZ01059421.2	ENSDART00000143063 CABZ01059421.2 chr1:57253844-57256758 (+)	chr1:57253844-57256758	+	0	No 3P tags	-	0	0
mogs	ENSDART00000132189 mogs chr1:41991773-41999628 (+), ENSDART00000084708 mogs chr1:41992195-41999624 (+)	chr1:41991773-41999628	+	1	Annotated and revised	9	325	524	chr1:41999303-41999624	Known 3'UTR	275	6	41999557	28	41999614	11	41999624	154	41999634	31	41999647	18	41999672	33	Novel 3'UTR (Extended)	19	1	41999827	19	Novel 3'UTR (Shortened)	47	2	41999319	39	41999473	8
BCL9	ENSDART00000053284 BCL9 chr1:47828750-47902806 (+), ENSDART00000113559 BCL9 chr1:47888302-47907556 (+)	chr1:47828750-47907556	+	1	Annotated and revised	6	1483	1483		Known 3'UTR	793	3	47907533	5	47907556	784	47907566	4	Novel 3'UTR (Shortened)	40	3	47906138	9	47906747	26	47907422	5
CASKIN1 (2 of 3)	ENSDART00000113289 CASKIN1 (2 of 3) chr1:7049572-7088804 (-)	chr1:7049566-7128158	-	1	Only extended	1	6	1701	chr1:7047871-7049572	Novel 3'UTR (Extended)	240	1	7047871	240
atic	ENSDART00000022307 atic chr1:4374952-4393284 (+)	chr1:4374952-4393284	+	1	Annotated and revised	11	606	4823	chr1:4392678-4393282	Known 3'UTR	2604	4	4393258	57	4393271	5	4393282	2529	4393292	13	Novel 3'UTR (Extended)	67	4	4393739	17	4394389	10	4394490	20	4397501	20	Novel 3'UTR (Shortened)	164	3	4392860	1	4392866	113	4392976	50
gne	ENSDART00000146549 gne chr1:11598283-11611392 (+), ENSDART00000054814 gne chr1:11591628-11630714 (+)	chr1:11591628-11630714	+	1	Annotated and revised	10	1332	2350		Known 3'UTR	342	1	11630714	342	Novel 3'UTR (Extended)	66	1	11631732	66	Novel 3'UTR (Shortened)	545	8	11629527	27	11629794	16	11629930	4	11630089	31	11630105	27	11630198	6	11630351	429	11630514	5
LPAR2 (1 of 2)	ENSDART00000062426 LPAR2 (1 of 2) chr1:59938139-59962020 (-), ENSDART00000111243 LPAR2 (1 of 2) chr1:59937887-59952964 (-)	chr1:59937887-59962020	-	2	Annotated and revised	4	316	2478	chr1:59937887-59938515	Known 3'UTR	858	2	59937887	742	59938145	116	Novel 3'UTR (Shortened)	61	1	59938359	61	Novel 3'UTR (Alternative last exon)	732	1	59941285	732
BX927068.5	ENSDART00000145350 BX927068.5 chr1:57351859-57355322 (+), ENSDART00000144552 BX927068.5 chr1:57351850-57354997 (+)	chr1:57351850-57355322	+	0	None associated with 3' UTR	0	0	0
ATP5J (2 of 2)	NM_001093968 MGC86324 chr1:47483946-47484057 (-), ENSDART00000129072 ATP5J (2 of 2) chr1:47482990-47486757 (-)	chr1:47482990-47486757	-	0	Only extended	1	0	175	chr1:47482851-47482990	Novel 3'UTR (Extended)	9	1	47482851	9
bdh2	ENSDART00000132542 bdh2 chr1:44096738-44110096 (-), ENSDART00000133715 bdh2 chr1:44102605-44109938 (-), ENSDART00000074597 bdh2 chr1:44096668-44110075 (-)	chr1:44096668-44110096	-	2	Annotated and revised	8	275	581		Known 3'UTR	108	5	44096573	8	44096594	9	44096672	56	44096736	30	44096789	5	Novel 3'UTR (Extended)	21	2	44096362	17	44096393	4	Novel 3'UTR (Shortened)	116	1	44096844	116
pwp2h	NM_001135528 PWP2 chr1:27830436-27880701 (-), ENSDART00000110270 pwp2h chr1:27829554-27880976 (-)	chr1:27829554-27880976	-	1	Annotated and revised	4	535	534	chr1:27829555-27830089	Known 3'UTR	1348	3	27829510	8	27829555	1333	27829594	7	Novel 3'UTR (Shortened)	130	1	27830061	130
TNPO2 (1 of 2)	ENSDART00000062945 TNPO2 (1 of 2) chr1:54733374-54746156 (-)	chr1:54733374-54746156	-	1	Annotated and revised	3	1040	1040	chr1:54733605-54736766	Known 3'UTR	1189	1	54733374	1189	Novel 3'UTR (Shortened)	2983	2	54733605	2935	54733620	48
SUGT1	ENSDART00000115319 SUGT1 chr1:26959197-27001092 (+), ENSDART00000026147 SUGT1 chr1:26950020-27000978 (+)	chr1:26950020-27001092	+	2	Annotated and revised	11	477	560	chr1:27000615-27000978	Known 3'UTR	2295	6	27000886	3	27000967	12	27000978	1902	27001091	332	27001102	37	27001175	9	Novel 3'UTR (Shortened)	168	5	27000647	7	27000741	135	27000751	13	27000852	7	27000874	6
OSBP	ENSDART00000031301 OSBP chr1:53158017-53193726 (+), ENSDART00000141530 OSBP chr1:53156865-53193726 (+)	chr1:53156865-53193726	+	0	Annotated and revised	8	0	4632	chr1:53193726-53198358	Known 3'UTR	29	1	53193793	29	Novel 3'UTR (Extended)	999	7	53194148	164	53194693	15	53194770	12	53195308	4	53195974	48	53198344	33	53198358	723
MTTP (2 of 2)	ENSDART00000015251 MTTP (2 of 2) chr1:11411055-11422839 (-)	chr1:11411055-11422839	-	0	No 3P tags	-	0	0
FP015850.4	ENSDART00000137471 FP015850.4 chr1:59873768-59874245 (-)	chr1:59873768-59874245	-	0	Only extended	1	0	166	chr1:59873602-59873768	Novel 3'UTR (Extended)	92	1	59873602	92
BX927068.2	ENSDART00000035575 BX927068.2 chr1:57450608-57454619 (+), ENSDART00000041884 BX927068.2 chr1:57451457-57454751 (+)	chr1:57450608-57454751	+	0	None associated with 3' UTR	0	0	0
emp1	ENSDART00000132366 emp1 chr1:45794092-45801144 (+), ENSDART00000132210 emp1 chr1:45793834-45798201 (+), ENSDART00000101477 emp1 chr1:45795063-45803328 (+), ENSDART00000148906 emp1 chr1:45794092-45795443 (+)	chr1:45793834-45803328	+	2	Only annotated	2	2437	2437		Known 3'UTR	1640	2	45801152	7	45803328	1633
C1H9orf156	ENSDART00000054184 C1H9orf156 chr1:25636948-25642038 (-)	chr1:25636948-25642038	-	1	Annotated and revised	9	94	5494	chr1:25637005-25637042	Known 3'UTR	433	1	25637005	433	Novel 3'UTR (Extended)	222	8	25631548	4	25631826	41	25632042	5	25634268	6	25634612	8	25634716	10	25635897	33	25636248	115
dnaja1l	NM_001079380 dnaja4.1 chr1:45458979-45464917 (+), ENSDART00000021336 dnaja1l chr1:45458475-45469909 (+)	chr1:45458475-45469909	+	1	Annotated and revised	16	929	2418	chr1:45468980-45471398	Known 3'UTR	45	1	45469914	45	Novel 3'UTR (Extended)	1831	7	45470019	4	45470078	41	45470150	18	45470163	52	45470287	29	45470810	11	45471398	1676	Novel 3'UTR (Shortened)	249	8	45469056	16	45469072	14	45469444	13	45469597	23	45469616	137	45469659	3	45469745	5	45469793
STIM2 (2 of 2)	ENSDART00000114097 STIM2 (2 of 2) chr1:13351604-13367292 (+), NM_001169117 STIM2 chr1:13353124-13367268 (+)	chr1:13351604-13367292	+	1	Only extended	3	48	5450	chr1:13367292-13368342	Novel 3'UTR (Extended)	72	3	13367946	15	13368342	41	13368355	16
si:ch211-127n13.2	ENSDART00000135759 si:ch211-127n13.2 chr1:26496893-26508188 (-)	chr1:26496893-26508188	-	1	Annotated and revised	2	484	517	chr1:26496860-26497487	Known 3'UTR	259	1	26496860	259	Novel 3'UTR (Shortened)	22	1	26497062	22
PKD1	ENSDART00000039911 PKD1 chr1:54829727-54941279 (-)	chr1:54829727-54973271	-	0	Only extended	5	0	4578	chr1:54825149-54829727	Novel 3'UTR (Extended)	380	5	54825129	140	54825149	215	54827456	4	54827475	14	54829239	7
N6AMT1	NM_001096083 n6amt1 chr1:981461-984702 (+), ENSDART00000051919 N6AMT1 chr1:977846-987211 (+)	chr1:977846-987211	+	1	Annotated and revised	8	318	514	chr1:986893-987211	Known 3'UTR	820	4	987141	16	987211	762	987222	33	987236	9	Novel 3'UTR (Extended)	288	3	987312	16	987382	6	987407	266	Novel 3'UTR (Shortened)	11	1	986916	11
fbxw7;si:dkey-104e13.1	ENSDART00000137406 si:dkey-104e13.1 chr1:23881783-24001782 (-), ENSDART00000086512 fbxw7 chr1:23725916-23881880 (-), ENSDART00000132355 si:dkey-104e13.1 chr1:23881546-24001717 (-), ENSDART00000148076 fbxw7 chr1:23727469-23775495 (-)	chr1:23725916-24001782	-	2	Annotated and revised	6	1981	2192		Known 3'UTR	1604	3	23725818	46	23725831	288	23725916	1270	Novel 3'UTR (Extended)	29	1	23725705	29	Novel 3'UTR (Shortened)	313	2	23726147	4	23727219	309
HTR1F (2 of 2)	ENSDART00000075626 HTR1F (2 of 2) chr1:33266866-33267985 (+)	chr1:33266866-33267985	+	0	None associated with 3' UTR	0	0	0
WDR17	ENSDART00000110824 WDR17 chr1:39130727-39156856 (+), ENSDART00000136300 WDR17 chr1:39112878-39157082 (+)	chr1:39112878-39157082	+	1	Only extended	3	226	1517	chr1:39156856-39158373	Novel 3'UTR (Extended)	755	3	39158000	7	39158216	19	39158373	729
dlx2b	ENSDART00000008469 dlx2b chr1:30034192-30035964 (-)	chr1:30034192-30035964	-	1	Annotated and revised	5	546	516	chr1:30034379-30034738	Known 3'UTR	26	2	30034222	18	30034258	8	Novel 3'UTR (Shortened)	321	3	30034379	205	30034396	11	30034413	105
fgb	ENSDART00000011701 fgb chr1:9127846-9135580 (+), ENSDART00000041987 fgb chr1:9127889-9135261 (+)	chr1:9127846-9135580	+	1	Annotated and revised	7	304	1083		Known 3'UTR	2081	5	9135292	21	9135500	4	9135515	1643	9135532	33	9135579	380	Novel 3'UTR (Extended)	10	1	9136344	10	Novel 3'UTR (Alternative last exon)	47	1	9127996	47
CABZ01058865.2	ENSDART00000124442 CABZ01058865.2 chr1:58120593-58123873 (+), ENSDART00000102882 CABZ01058865.2 chr1:58120593-58123867 (+)	chr1:58120593-58123873	+	0	None associated with 3' UTR	0	0	0
C1H7orf26	ENSDART00000138630 C1H7orf26 chr1:8949378-8961410 (-), ENSDART00000054843 C1H7orf26 chr1:8949398-8961404 (-)	chr1:8949378-8961410	-	1	Only annotated	1	216	199	chr1:8949395-8949594	Known 3'UTR	171	1	8949395	171
slc34a2a	ENSDART00000024328 slc34a2a chr1:13317178-13327647 (+), NM_204474 SLC34A2 chr1:13319471-13327035 (+)	chr1:13317178-13327647	+	1	Only annotated	1	467	467	chr1:13327180-13327647	Known 3'UTR	48	1	13327647	48
si:ch211-76m11.3	ENSDART00000136953 si:ch211-76m11.3 chr1:37672997-37688847 (+), ENSDART00000131380 si:ch211-76m11.3 chr1:37675877-37688806 (+), ENSDART00000147136 si:ch211-76m11.3 chr1:37672991-37688847 (+)	chr1:37672991-37688847	+	1	No 3P tags	-	41	41
si:ch73-341p18.5	ENSDART00000141089 si:ch73-341p18.5 chr1:56243400-56247139 (+)	chr1:56243400-56247139	+	0	No 3P tags	-	0	0
uchl1	ENSDART00000122309 uchl1 chr1:21421849-21422305 (-), ENSDART00000036797 uchl1 chr1:21421850-21426118 (-)	chr1:21421849-21426118	-	1	Annotated and revised	3	372	371	chr1:21421850-21422221	Known 3'UTR	6526	2	21421840	45	21421850	6481	Novel 3'UTR (Shortened)	44	1	21422018	44
dkk2	ENSDART00000114098 dkk2 chr1:50899798-50945330 (-)	chr1:50899798-50945330	-	1	Only extended	2	297	4470	chr1:50896380-50900095	Novel 3'UTR (Extended)	102	2	50895541	5	50896380	97
mfap4	NM_001141245 mfap4 chr1:59846093-59846883 (+), ENSDART00000100199 mfap4 chr1:59845804-59847118 (+)	chr1:59845804-59847118	+	1	Only annotated	2	130	127	chr1:59846988-59847115	Known 3'UTR	333	2	59847115	293	59847137	40
PROS1	ENSDART00000098627 PROS1 chr1:217982-228857 (-), NM_174438 PROS1 chr1:218511-227133 (-)	chr1:217982-228857	-	1	Only annotated	1	414	413	chr1:217983-218396	Known 3'UTR	3780	1	217983	3780
CNTLN	ENSDART00000134032 CNTLN chr1:25973817-25980957 (-), ENSDART00000147414 CNTLN chr1:25793077-25980941 (-), ENSDART00000044234 CNTLN chr1:25793677-25980177 (-)	chr1:25793077-25980957	-	1	Only annotated	1	600	594		Known 3'UTR	182	1	25793083	182
mettl14	ENSDART00000102993 mettl14 chr1:18807187-18811849 (-)	chr1:18807187-18811849	-	1	Annotated and revised	6	236	1063	chr1:18807190-18807423	Known 3'UTR	1119	2	18807190	1111	18807213	8	Novel 3'UTR (Extended)	57	4	18806360	26	18806869	5	18806888	11	18807014	15
pnpla6	ENSDART00000139219 pnpla6 chr1:46341139-46359301 (-), ENSDART00000049716 pnpla6 chr1:46337734-46384492 (-), ENSDART00000144735 pnpla6 chr1:46350955-46360513 (-), ENSDART00000140890 pnpla6 chr1:46337384-46391325 (-)	chr1:46337384-46391325	-	2	Annotated and revised	5	3513	2929		Known 3'UTR	1677	3	46337734	1652	46337755	9	46337794	16	Novel 3'UTR (Shortened)	13	2	46337898	6	46340375	7
ugp2a	ENSDART00000010449 ugp2a chr1:51506477-51524949 (+)	chr1:51506477-51524949	+	2	Only extended	2	62	2985	chr1:51524887-51527872	Novel 3'UTR (Extended)	100	2	51527753	16	51527872	84
si:ch73-41e3.7	ENSDART00000147610 si:ch73-41e3.7 chr1:393549-399130 (-), ENSDART00000121630 si:ch73-41e3.7 chr1:393577-397303 (-)	chr1:393549-399130	-	1	Annotated and revised	2	28	664	chr1:393550-393577	Known 3'UTR	88	1	393550	88	Novel 3'UTR (Extended)	20	1	392913	20
lias	ENSDART00000036448 lias chr1:22048803-22057562 (+), NM_001011234 lias chr1:22050896-22054723 (+)	chr1:22048803-22057562	+	1	Annotated and revised	5	337	331	chr1:22057225-22057556	Known 3'UTR	2346	4	22057481	6	22057520	9	22057556	2321	22057568	10	Novel 3'UTR (Shortened)	10	1	22057306	10
hlxb9lb	ENSDART00000040368 hlxb9lb chr1:4339023-4344652 (-), ENSDART00000114035 hlxb9lb chr1:4338930-4344656 (-)	chr1:4338930-4344656	-	2	Only extended	1	102	2658	chr1:4336374-4339032	Novel 3'UTR (Extended)	34	1	4336374	34
IFNGR2	ENSDART00000149931 IFNGR2 chr1:9985706-10005135 (-), ENSDART00000111406 IFNGR2 chr1:9987515-9991549 (-)	chr1:9985706-10005135	-	1	Only extended	3	133	1845		Novel 3'UTR (Extended)	123	3	9984344	23	9984354	95	9984367	5
SNX8 (2 of 3)	ENSDART00000113560 SNX8 (2 of 3) chr1:11390513-11400926 (-), NM_001046533 SNX8 chr1:11390735-11394110 (-)	chr1:11390513-11400926	-	0	None associated with 3' UTR	0	0	0
MMD2 (1 of 2)	ENSDART00000147383 MMD2 (1 of 2) chr1:7001579-7004772 (+), ENSDART00000126987 MMD2 (1 of 2) chr1:6997449-7006421 (+)	chr1:6997449-7006421	+	0	None associated with 3' UTR	0	0	0
si:ch211-235f1.3	ENSDART00000144500 si:ch211-235f1.3 chr1:2088422-2091040 (-)	chr1:2088422-2091040	-	1	Only annotated	1	333	394	chr1:2088361-2088755	Known 3'UTR	797	1	2088361	797
adprhl1	ENSDART00000060968 adprhl1 chr1:74984-80899 (-)	chr1:74984-80899	-	2	Annotated and revised	3	435	684	chr1:74984-75797	Known 3'UTR	66	2	74929	4	74984	62	Novel 3'UTR (Extended)	7	1	74735	7
BX927114.1	ENSDART00000110391 BX927114.1 chr1:58520144-58524010 (-)	chr1:58520144-58524010	-	0	No 3P tags	-	0	0
cpb2	ENSDART00000101856 cpb2 chr1:28704917-28709300 (+), ENSDART00000054059 cpb2 chr1:28704917-28709296 (+)	chr1:28704917-28709300	+	1	Only annotated	1	324	292	chr1:28708976-28709268	Known 3'UTR	5	1	28709268	5
fam114a1	ENSDART00000082063 fam114a1 chr1:17317641-17333963 (-), ENSDART00000147228 fam114a1 chr1:17320145-17326941 (-)	chr1:17317641-17333963	-	1	Annotated and revised	8	389	3519		Known 3'UTR	230	3	17317636	159	17317652	12	17317719	59	Novel 3'UTR (Extended)	104	4	17314511	7	17316532	14	17317063	76	17317446	7	Novel 3'UTR (Shortened)	6	1	17318005	6
CTNND1 (1 of 2)	ENSDART00000111490 CTNND1 (1 of 2) chr1:44757239-44783336 (+), ENSDART00000127839 CTNND1 (1 of 2) chr1:44757227-44786957 (+)	chr1:44757227-44786957	+	0	Only extended	11	0	2006		Novel 3'UTR (Extended)	1150	11	44787136	5	44787366	7	44787585	6	44787633	4	44787779	208	44788176	8	44788377	32	44788739	6	44788766	395	44788950	211	44788963	268
CABZ01060296.1	ENSDART00000126345 CABZ01060296.1 chr1:41941655-41955238 (+)	chr1:41941655-41955238	+	0	None associated with 3' UTR	0	0	0
C1H13orf1 (2 of 2)	ENSDART00000074514 C1H13orf1 (2 of 2) chr1:47207753-47215460 (-)	chr1:47207753-47215460	-	2	Annotated and revised	13	441	1723	chr1:47206471-47208194	Known 3'UTR	32	4	47207740	4	47207787	6	47207801	16	47207811	6	Novel 3'UTR (Extended)	1564	5	47206471	1214	47206553	307	47206633	28	47207009	11	47207619	4	Novel 3'UTR (Shortened)	78	4	47207855	10	47207870	60	47207886	4	47207919	4
CABZ01113191.1	ENSDART00000124478 CABZ01113191.1 chr1:667780-682454 (+)	chr1:667780-682454	+	1	Only annotated	1	3384	3384	chr1:679070-682454	Known 3'UTR	4	1	682454	4
plrg1	ENSDART00000054235 plrg1 chr1:24508316-24524004 (+), ENSDART00000125834 plrg1 chr1:24507027-24523652 (+), ENSDART00000131111 plrg1 chr1:24508384-24523999 (+), ENSDART00000123032 plrg1 chr1:24508359-24524001 (+)	chr1:24507027-24524004	+	1	Annotated and revised	7	1245	5329		Known 3'UTR	3369	4	24523718	22	24523999	1807	24524038	1391	24524054	149	Novel 3'UTR (Extended)	120	2	24524762	107	24524883	13	Novel 3'UTR (Shortened)	235	1	24523642	235
aimp1	ENSDART00000084184 aimp1 chr1:50801020-50826737 (+)	chr1:50801020-50826737	+	1	Only annotated	1	91	90	chr1:50826646-50826736	Known 3'UTR	2663	1	50826736	2663
fabp2	NM_001085877 fabp2-a chr1:24706041-24708591 (+), ENSDART00000027973 fabp2 chr1:24705630-24708975 (+)	chr1:24705630-24708975	+	1	Only annotated	3	250	204	chr1:24708725-24708929	Known 3'UTR	42341	3	24708916	19409	24708929	22407	24708976	525
BX927068.1	ENSDART00000019896 BX927068.1 chr1:57424258-57428446 (+)	chr1:57424258-57428446	+	0	None associated with 3' UTR	0	0	0
CU914627.1	ENSDART00000006357 CU914627.1 chr1:30418457-30430072 (-)	chr1:30414964-30430072	-	1	Only extended	4	87	4436	chr1:30417738-30418457	Novel 3'UTR (Extended)	63	4	30414021	18	30417435	12	30417738	29	30418333	4
CR788255.3	ENSDART00000128858 CR788255.3 chr1:55989388-55994560 (+)	chr1:55989388-55994560	+	0	None associated with 3' UTR	0	0	0
CU914621.2	ENSDART00000109641 CU914621.2 chr1:59145476-59154476 (-)	chr1:59145476-59154476	-	0	None associated with 3' UTR	0	0	0
asah1b	ENSDART00000040434 asah1b chr1:15396152-15406860 (-)	chr1:15396152-15406860	-	2	Annotated and revised	8	438	2654	chr1:15396152-15396590	Known 3'UTR	1666	4	15396108	173	15396127	685	15396152	789	15396187	19	Novel 3'UTR (Extended)	13	2	15393936	7	15395384	6	Novel 3'UTR (Shortened)	19	2	15396267	6	15396440	13
GK	ENSDART00000148536 GK chr1:27654940-27762748 (-), ENSDART00000148522 GK chr1:27654716-27680504 (-), ENSDART00000075470 GK chr1:27654941-27762679 (-)	chr1:27654716-27762748	-	2	Annotated and revised	6	612	1465	chr1:27653863-27655328	Known 3'UTR	80	3	27654773	27	27654803	6	27654941	47	Novel 3'UTR (Extended)	882	1	27653863	882	Novel 3'UTR (Shortened)	22	2	27655080	9	27655264	13
si:dkey-222h21.10	ENSDART00000138007 si:dkey-222h21.10 chr1:58908970-58923684 (+), ENSDART00000138467 si:dkey-222h21.10 chr1:58907741-58909577 (+)	chr1:58907741-58923684	+	0	None associated with 3' UTR	0	0	0
si:zfos-2330d3.6	ENSDART00000149962 si:zfos-2330d3.6 chr1:59862723-59863393 (-)	chr1:59862723-59863393	-	1	Only annotated	1	163	164	chr1:59862722-59862886	Known 3'UTR	219	1	59862722	219
p2rx3b	ENSDART00000049701 p2rx3b chr1:45201631-45213868 (+), ENSDART00000133926 p2rx3b chr1:45201631-45213866 (+)	chr1:45201631-45213868	+	1	Only annotated	3	1520	1454	chr1:45212346-45213834	Known 3'UTR	32	3	45213834	14	45213846	8	45213871	10
CENPQ;MRPL39 (1 of 2);mrpl39	ENSDART00000149101 MRPL39 (1 of 2) chr1:407554-466021 (+), ENSDART00000147633 mrpl39 chr1:455338-466028 (+), ENSDART00000060944 mrpl39 chr1:407503-466025 (+), ENSDART00000088071 CENPQ chr1:408912-427013 (+)	chr1:407503-466028	+	1	Annotated and revised	10	68	4882		Known 3'UTR	1609	2	466023	1594	466033	15	Novel 3'UTR (Extended)	385	7	428156	7	428184	94	431068	170	431895	74	466998	12	467076	20	467132	8	Novel 3'UTR (Alternative last exon)	35	1	424468	35
galnt7	ENSDART00000135666 galnt7 chr1:38563309-38571942 (+), ENSDART00000114903 galnt7 chr1:38552423-38580268 (+), ENSDART00000079928 galnt7 chr1:38552080-38576180 (+)	chr1:38552080-38580268	+	2	Annotated and revised	11	4806	806		Known 3'UTR	728	4	38576093	5	38576124	7	38576142	7	38576173	709	Novel 3'UTR (Shortened)	128	5	38575503	8	38575648	40	38575689	45	38575766	4	38576012	31	Novel 3'UTR (Alternative last exon)	17	2	38563806	7	38563825	10
FGFBP1 (2 of 2)	ENSDART00000128918 FGFBP1 (2 of 2) chr1:21451705-21452326 (-), NM_001141875 fgfp1 chr1:21451897-21452071 (-)	chr1:21451705-21452326	-	0	Only extended	1	0	1106	chr1:21450791-21451705	Novel 3'UTR (Extended)	66	1	21450791	66
si:dkey-26i13.8	ENSDART00000147623 si:dkey-26i13.8 chr1:10892348-10914253 (+), ENSDART00000090721 si:dkey-26i13.8 chr1:10892775-10914206 (+), ENSDART00000138355 si:dkey-26i13.8 chr1:10892625-10900144 (+)	chr1:10892348-10914253	+	1	Only extended	2	47	292		Novel 3'UTR (Extended)	222	2	10914432	218	10914498	4
NPY2R (1 of 3)	NM_001205099 Npy2r chr1:9181879-9192514 (-), ENSDART00000080453 NPY2R (1 of 3) chr1:9181786-9192922 (-)	chr1:9181786-9192922	-	0	Only extended	2	0	1090	chr1:9179467-9181786	Novel 3'UTR (Extended)	10	2	9179435	4	9179467	6
BX284640.3	ENSDART00000131015 BX284640.3 chr1:55789910-55801379 (-)	chr1:55789910-55801379	-	1	Only annotated	2	73	73	chr1:55789910-55789983	Known 3'UTR	1259	2	55789910	1255	55789924	4
CABZ01058863.1	ENSDART00000046961 CABZ01058863.1 chr1:58174834-58183630 (-)	chr1:58174834-58183630	-	0	Only extended	1	0	283	chr1:58174551-58174834	Novel 3'UTR (Extended)	26	1	58174551	26
CABZ01086597.1	ENSDART00000125342 CABZ01086597.1 chr1:54357715-54361386 (+)	chr1:54357715-54361386	+	0	Only extended	2	0	374	chr1:54361386-54361661	Novel 3'UTR (Extended)	37	2	54361661	25	54361760	12
scpp5	ENSDART00000113673 scpp5 chr1:44292452-44298087 (-)	chr1:44292452-44298087	-	1	Annotated and revised	3	308	308	chr1:44292452-44292879	Known 3'UTR	107	2	44292452	93	44292522	14	Novel 3'UTR (Shortened)	39	1	44292640	39
znf330	ENSDART00000131520 znf330 chr1:53765282-53772878 (-), ENSDART00000127141 znf330 chr1:53762199-53772814 (-), ENSDART00000014232 znf330 chr1:53762194-53773351 (-)	chr1:53762194-53773351	-	1	Annotated and revised	6	617	1054		Known 3'UTR	2546	2	53762198	1833	53762296	713	Novel 3'UTR (Extended)	5	1	53762048	5	Novel 3'UTR (Shortened)	88	3	53762306	9	53762379	11	53762575	68
si:dkeyp-75b4.7	ENSDART00000142906 si:dkeyp-75b4.7 chr1:9048648-9056849 (-), ENSDART00000127564 si:dkeyp-75b4.7 chr1:9048908-9056865 (-)	chr1:9048648-9056865	-	1	No 3P tags	-	577	577
CABZ01059392.2	ENSDART00000073987 CABZ01059392.2 chr1:56998772-56999682 (+)	chr1:56998772-56999682	+	0	No 3P tags	-	0	0
si:dkey-265k11.2	ENSDART00000136916 si:dkey-265k11.2 chr1:40683571-40700326 (+), ENSDART00000110014 si:dkey-265k11.2 chr1:40683583-40686432 (+)	chr1:40683571-40700326	+	1	Annotated and revised	4	374	373		Known 3'UTR	136	1	40700325	136	Novel 3'UTR (Shortened)	141	3	40699973	118	40699984	15	40700163	8
exosc9	ENSDART00000131948 exosc9 chr1:17825426-17832218 (+), ENSDART00000002886 exosc9 chr1:17825395-17834050 (+)	chr1:17825395-17834050	+	1	Only annotated	3	104	162		Known 3'UTR	483	3	17834050	395	17834087	78	17834108	10
gas6	NM_001143945 GAS6 chr1:193306-195944 (-), ENSDART00000010092 gas6 chr1:187474-213136 (-)	chr1:187474-213136	-	1	Only annotated	1	443	442	chr1:187475-187917	Known 3'UTR	1082	1	187475	1082
ATG4D (1 of 2)	ENSDART00000063936 ATG4D (1 of 2) chr1:51899921-51915529 (+), NM_001093948 atg4d chr1:51900050-51911940 (+)	chr1:51899921-51915529	+	1	Annotated and revised	7	3040	3340	chr1:51912489-51915387	Known 3'UTR	68	1	51915529	68	Novel 3'UTR (Extended)	23	1	51915634	23	Novel 3'UTR (Shortened)	747	5	51913020	10	51915226	69	51915239	11	51915387	555	51915411	102
ANK2 (1 of 2)	NM_001104063 Ank2 chr1:12962581-13012431 (+), ENSDART00000021693 ANK2 (1 of 2) chr1:12914286-13044995 (+)	chr1:12914286-13044995	+	1	Only annotated	1	1832	1832	chr1:13043163-13044995	Known 3'UTR	1072	1	13044995	1072
cd99	ENSDART00000136383 cd99 chr1:33020649-33045276 (-), ENSDART00000141347 cd99 chr1:33021426-33045263 (-), ENSDART00000102198 cd99 chr1:33020652-33045240 (-)	chr1:33020649-33045276	-	2	Annotated and revised	12	1070	7658	chr1:33020652-33021719	Known 3'UTR	1570	3	33020631	11	33020652	1508	33020730	51	Novel 3'UTR (Extended)	55	2	33019457	10	33020543	45	Novel 3'UTR (Shortened)	197	3	33020770	74	33020784	11	33020877	112	Novel 3'UTR (Alternative last exon)	684	4	33023938	242	33025592	405	33026617	8	33030496	29
elmod2	ENSDART00000134285 elmod2 chr1:53890802-53903138 (-), ENSDART00000111938 elmod2 chr1:53887037-53945782 (-), ENSDART00000074215 elmod2 chr1:53887037-53903154 (-)	chr1:53887037-53945782	-	2	Annotated and revised	3	4176	2543	chr1:53887037-53891446	Known 3'UTR	5073	1	53887037	5073	Novel 3'UTR (Shortened)	28	2	53887275	22	53891170	6
ndst3	ENSDART00000146084 ndst3 chr1:18885369-19054531 (-), ENSDART00000136145 ndst3 chr1:18885369-19051984 (-), ENSDART00000061232 ndst3 chr1:18885603-19051984 (-)	chr1:18885369-19054531	-	1	Only extended	3	234	860	chr1:18884743-18885603	Novel 3'UTR (Extended)	539	3	18884719	11	18884733	146	18884743	382
rbm46	NM_001135717 Rbm46 chr1:9305260-9310072 (+), ENSDART00000110698 rbm46 chr1:9303311-9313555 (+)	chr1:9303311-9313555	+	1	Only annotated	2	356	351	chr1:9313199-9313550	Known 3'UTR	1328	2	9313477	52	9313550	1276
CU302202.5	ENSDART00000125051 CU302202.5 chr1:58265628-58267053 (+)	chr1:58265628-58267053	+	0	No 3P tags	-	0	0
MAML3	ENSDART00000144135 MAML3 chr1:40729191-40733208 (-), ENSDART00000114659 MAML3 chr1:40726407-40911858 (-)	chr1:40726407-40911858	-	1	Annotated and revised	5	2677	2678		Known 3'UTR	150	1	40726406	150	Novel 3'UTR (Shortened)	300	4	40726714	6	40727049	9	40728410	5	40728678	280
mtnr1aa	ENSDART00000054674 mtnr1aa chr1:16993229-17078773 (-)	chr1:16993229-17078773	-	1	Annotated and revised	5	524	4310	chr1:16989443-16993753	Known 3'UTR	4	1	16993233	4	Novel 3'UTR (Extended)	19	2	16989404	6	16989443	13	Novel 3'UTR (Shortened)	9	2	16993441	5	16993586	4
CU914621.1	ENSDART00000111316 CU914621.1 chr1:59114762-59115784 (-)	chr1:59114762-59115784	-	0	None associated with 3' UTR	0	0	0
SETDB2	ENSDART00000129342 SETDB2 chr1:769341-772993 (+)	chr1:769341-772993	+	0	Only extended	2	0	200	chr1:772993-773193	Novel 3'UTR (Extended)	355	2	773193	344	773212	11
BX927068.3	ENSDART00000099106 BX927068.3 chr1:57373889-57377691 (+), ENSDART00000129527 BX927068.3 chr1:57373533-57379446 (+)	chr1:57373533-57379446	+	0	None associated with 3' UTR	0	0	0
rnaseh2a	ENSDART00000045894 rnaseh2a chr1:52206820-52214585 (-), NM_001038534 RNASEH2A chr1:52207308-52213055 (-)	chr1:52206820-52214585	-	1	Only annotated	1	159	159	chr1:52206820-52206979	Known 3'UTR	330	1	52206820	330
slc25a4	ENSDART00000030665 slc25a4 chr1:16418639-16420984 (+)	chr1:16418639-16420984	+	1	Only annotated	1	463	462	chr1:16420521-16420983	Known 3'UTR	17818	1	16420983	17818
BX901881.1	ENSDART00000114249 BX901881.1 chr1:27639078-27640382 (-)	chr1:27639078-27640382	-	0	No 3P tags	-	0	0
WFIKKN1	NM_001168825 WFIKKN1 chr1:60021563-60022767 (-), ENSDART00000065642 WFIKKN1 chr1:59992738-60022767 (-)	chr1:59992738-60022767	-	1	No 3P tags	-	678	678
pdlim3a	ENSDART00000018238 pdlim3a chr1:16463747-16477756 (-)	chr1:16463747-16477756	-	1	Annotated and revised	4	541	539	chr1:16464078-16464288	Known 3'UTR	15	2	16463749	10	16463768	5	Novel 3'UTR (Shortened)	27	2	16464078	14	16464106	13
ebpl	ENSDART00000053220 ebpl chr1:47157319-47161104 (-), ENSDART00000134450 ebpl chr1:47157319-47161104 (-)	chr1:47157319-47161104	-	1	Only annotated	2	307	307	chr1:47157319-47157626	Known 3'UTR	474	2	47157319	466	47157329	8
TMEM66	ENSDART00000137697 TMEM66 chr1:11231969-11240873 (-), ENSDART00000103403 TMEM66 chr1:11231664-11240875 (-)	chr1:11231664-11240875	-	2	Only extended	1	523	707	chr1:11231480-11232187	Novel 3'UTR (Extended)	901	1	11231480	901
SORCS1	NM_021377 Sorcs1 chr1:48826360-49428444 (-), ENSDART00000114711 SORCS1 chr1:49109596-49185906 (-)	chr1:48826360-49428444	-	1	None associated with 3' UTR	0	30	0
OLFM2 (2 of 2)	ENSDART00000014000 OLFM2 (2 of 2) chr1:60305459-60313172 (+)	chr1:60305459-60313172	+	1	Only annotated	1	770	770	chr1:60312402-60313172	Known 3'UTR	139	1	60313172	139
si:ch211-76m11.15	ENSDART00000149111 si:ch211-76m11.15 chr1:37696174-37697609 (+)	chr1:37696174-37697609	+	1	No 3P tags	-	570	570
FBXO48	ENSDART00000129052 FBXO48 chr1:52117856-52123828 (-)	chr1:52117856-52123828	-	0	Only extended	12	0	818	chr1:52117433-52117856	Novel 3'UTR (Extended)	1314	12	52117038	17	52117062	5	52117084	4	52117132	201	52117152	4	52117175	148	52117270	189	52117348	11	52117362	25	52117418	80	52117433	626	52117600	4
CCDC111	ENSDART00000147076 CCDC111 chr1:20345962-20349028 (+), ENSDART00000006147 CCDC111 chr1:20345985-20355665 (+)	chr1:20345962-20355665	+	1	Annotated and revised	6	216	1555		Known 3'UTR	76	2	20355619	45	20355661	31	Novel 3'UTR (Extended)	18	2	20349457	12	20355869	6	Novel 3'UTR (Shortened)	10	2	20355540	6	20355552	4
BRP44 (2 of 2)	ENSDART00000054879 BRP44 (2 of 2) chr1:9860144-9875371 (+), NM_001170100 CG9399 chr1:9863696-9868190 (+)	chr1:9860144-9875371	+	1	Annotated and revised	7	2936	3471	chr1:9872435-9875371	Known 3'UTR	1205	1	9875371	1205	Novel 3'UTR (Extended)	177	4	9875471	102	9875487	18	9875822	42	9875842	15	Novel 3'UTR (Shortened)	267	2	9872690	237	9875135	30
METRNL (2 of 2)	ENSDART00000018758 METRNL (2 of 2) chr1:57636522-57646803 (-)	chr1:57636522-57646803	-	0	Only extended	2	0	1602	chr1:57634920-57636522	Novel 3'UTR (Extended)	186	2	57634906	23	57634920	163
gpm6ba	ENSDART00000019770 gpm6ba chr1:27892262-27976036 (-), ENSDART00000101911 gpm6ba chr1:27893186-27976033 (-)	chr1:27892262-27976036	-	2	Only extended	2	1178	3175	chr1:27890333-27893440	Novel 3'UTR (Extended)	4844	2	27890265	578	27890333	4266
pcm1	ENSDART00000089654 pcm1 chr1:15367572-15395356 (+), ENSDART00000149026 pcm1 chr1:15363239-15396056 (+)	chr1:15363239-15396056	+	1	Annotated and revised	2	700	700	chr1:15395356-15396056	Known 3'UTR	6843	1	15396056	6843	Novel 3'UTR (Shortened)	19	1	15395750	19
CU302202.1	ENSDART00000056226 CU302202.1 chr1:58246308-58252883 (-)	chr1:58246308-58252883	-	0	No 3P tags	-	0	0
si:ch73-90k17.1	ENSDART00000133572 si:ch73-90k17.1 chr1:45786755-45790819 (-)	chr1:45786755-45790819	-	0	None associated with 3' UTR	0	0	0
C1H19orf67	ENSDART00000101410 C1H19orf67 chr1:46214810-46222703 (-), ENSDART00000141756 C1H19orf67 chr1:46220755-46222954 (-), ENSDART00000133979 C1H19orf67 chr1:46215077-46221084 (-)	chr1:46214810-46222954	-	2	Annotated and revised	6	812	817		Known 3'UTR	153	3	46214805	81	46214833	8	46214904	64	Novel 3'UTR (Shortened)	40	3	46215391	6	46215540	26	46215552	8
nanos3	ENSDART00000098615 nanos3 chr1:55787172-55788301 (-)	chr1:55787172-55788301	-	1	Annotated and revised	2	618	615	chr1:55787175-55787790	Known 3'UTR	1325	1	55787175	1325	Novel 3'UTR (Shortened)	4	1	55787404	4
NPY2R (3 of 3)	ENSDART00000140172 NPY2R (3 of 3) chr1:24590114-24591267 (+), NM_001012637 NPY2R chr1:24590244-24591120 (+)	chr1:24590114-24591267	+	0	None associated with 3' UTR	0	0	0
radil	ENSDART00000145460 radil chr1:7020256-7025402 (+)	chr1:7020256-7025402	+	0	No 3P tags	-	0	0
si:dkey-222h21.1	ENSDART00000140754 si:dkey-222h21.1 chr1:59047304-59050281 (+)	chr1:59047304-59050281	+	0	No 3P tags	-	0	0
si:dkey-234d14.2	ENSDART00000147193 si:dkey-234d14.2 chr1:21201228-21202947 (+)	chr1:21201228-21202947	+	1	Only annotated	1	21	36	chr1:21202926-21202962	Known 3'UTR	23	1	21202962	23
CABZ01084503.1	ENSDART00000110428 CABZ01084503.1 chr1:59762241-59763166 (+), ENSDART00000050389 CABZ01084503.1 chr1:59762163-59762762 (+)	chr1:59762163-59763166	+	0	Only extended	1	0	757		Novel 3'UTR (Extended)	4	1	59763519	4
timm10	ENSDART00000100321 timm10 chr1:44846026-44849977 (+)	chr1:44846026-44849977	+	1	Only annotated	2	402	402	chr1:44849575-44849977	Known 3'UTR	7848	2	44849977	7825	44849989	23
TNIP2	NM_001165345 tnip2 chr1:37223704-37227754 (-), ENSDART00000113542 TNIP2 chr1:37223710-37227925 (-)	chr1:37223704-37227925	-	1	Only revised	3	90	1065	chr1:37222645-37223710	Novel 3'UTR (Extended)	148	2	37222635	24	37222645	124	Novel 3'UTR (Alternative last exon)	4	1	37225832	4
cxxc4	ENSDART00000112899 cxxc4 chr1:25135779-25175791 (-), ENSDART00000142073 cxxc4 chr1:25135779-25175485 (-)	chr1:25135779-25175791	-	0	Only extended	3	0	2220	chr1:25134239-25135779	Novel 3'UTR (Extended)	30	3	25133559	5	25134239	13	25134300	12
CR848833.1	ENSDART00000122532 CR848833.1 chr1:14185450-14219429 (-)	chr1:14185450-14219429	-	0	No 3P tags	-	0	0
vegfc	ENSDART00000136102 vegfc chr1:39248831-39270471 (-), ENSDART00000101489 vegfc chr1:39213357-39270725 (-)	chr1:39213357-39270725	-	1	Annotated and revised	4	305	857		Known 3'UTR	12	2	39213272	4	39213285	8	Novel 3'UTR (Extended)	227	2	39212805	183	39213230	44
dok1a	ENSDART00000109925 dok1a chr1:41859419-41865666 (+), ENSDART00000134626 dok1a chr1:41859316-41865833 (+)	chr1:41859316-41865833	+	1	Only extended	2	5	638		Novel 3'UTR (Extended)	83	2	41865947	64	41866304	19
TMEM39A	ENSDART00000103925 TMEM39A chr1:571454-576655 (+), NM_001141322 ubil chr1:644896-645031 (+), ENSDART00000103928 TMEM39A chr1:571454-576655 (+), ENSDART00000129489 TMEM39A chr1:572579-658993 (+)	chr1:571454-658993	+	2	Annotated and revised	7	3300	4547		Known 3'UTR	3838	4	576654	370	576664	161	658993	2084	659041	1223	Novel 3'UTR (Extended)	5	1	650458	5	Novel 3'UTR (Shortened)	321	2	645806	229	658873	92
BX469930.2	ENSDART00000128873 BX469930.2 chr1:58668192-58677395 (+)	chr1:58668192-58677395	+	0	No 3P tags	-	0	0
acsl1	ENSDART00000146946 acsl1 chr1:16297838-16311908 (-), ENSDART00000125125 acsl1 chr1:16280825-16311688 (-), ENSDART00000039917 acsl1 chr1:16279345-16329447 (-)	chr1:16279345-16329447	-	2	Annotated and revised	5	2198	2516		Known 3'UTR	254	1	16279344	254	Novel 3'UTR (Extended)	1073	2	16279027	8	16279216	1065	Novel 3'UTR (Shortened)	28	2	16281067	13	16281138	15
CR848663.1	ENSDART00000100335 CR848663.1 chr1:44609370-44611495 (-)	chr1:44609370-44611495	-	0	None associated with 3' UTR	0	0	0
wu:fc75a09	ENSDART00000127325 wu:fc75a09 chr1:53249322-53256921 (+)	chr1:53249322-53256921	+	1	Annotated and revised	2	2893	2893	chr1:53254028-53254062	Known 3'UTR	20	1	53256921	20	Novel 3'UTR (Shortened)	147	1	53254062	147
si:dkey-30k22.7	ENSDART00000126068 si:dkey-30k22.7 chr1:24483790-24488697 (-), ENSDART00000135763 si:dkey-30k22.7 chr1:24482157-24505968 (-), ENSDART00000125204 si:dkey-30k22.7 chr1:24488766-24499794 (-), ENSDART00000126076 si:dkey-30k22.7 chr1:24499904-24506039 (-), ENSDART00000032841 si:dkey-30k22.7 chr1:24458228-24483688 (-)	chr1:24458228-24506039	-	0	No 3P tags	-	0	0
FP245449.1	ENSDART00000111879 FP245449.1 chr1:56205752-56206209 (+)	chr1:56205752-56206209	+	0	None associated with 3' UTR	0	0	0
ddx39aa	ENSDART00000101224 ddx39aa chr1:45661398-45670713 (-), ENSDART00000145757 ddx39aa chr1:45666649-45669043 (-), ENSDART00000014727 ddx39aa chr1:45661397-45670821 (-)	chr1:45661397-45670821	-	1	Only annotated	1	244	243		Known 3'UTR	14079	1	45661398	14079
zgc:154142	ENSDART00000064036 zgc:154142 chr1:51303753-51347482 (-), ENSDART00000138224 zgc:154142 chr1:51312421-51347482 (-)	chr1:51303753-51347482	-	1	Annotated and revised	6	1475	2507		Known 3'UTR	299	2	51303662	5	51303753	294	Novel 3'UTR (Extended)	83	4	51302721	10	51303043	48	51303104	5	51303453	20
si:dkey-256e7.8	ENSDART00000133027 si:dkey-256e7.8 chr1:16454585-16457388 (-)	chr1:16454585-16457388	-	1	None associated with 3' UTR	0	326	0
mxa	ENSDART00000122566 mxa chr1:6488340-6496024 (+), ENSDART00000103588 mxa chr1:6488340-6496206 (+)	chr1:6488340-6496206	+	2	Only revised	3	701	1146		Novel 3'UTR (Extended)	49	2	6496651	42	6496671	7	Novel 3'UTR (Shortened)	85	1	6495874	85
cyp4v2	NM_001092584 cyp4v2 chr1:16642918-16653300 (+), ENSDART00000089480 cyp4v2 chr1:16642200-16654540 (+)	chr1:16642200-16654540	+	1	Annotated and revised	5	893	922	chr1:16653647-16654391	Known 3'UTR	85	2	16654511	4	16654569	81	Novel 3'UTR (Shortened)	135	3	16654156	38	16654317	13	16654391	84
LIPT1	ENSDART00000033669 LIPT1 chr1:46393391-46394688 (+), NM_001093873 lipt1 chr1:46393650-46394409 (+)	chr1:46393391-46394688	+	1	Only annotated	1	9	20	chr1:46394679-46394699	Known 3'UTR	132	1	46394699	132
si:ch211-202h22.8	ENSDART00000143997 si:ch211-202h22.8 chr1:55177535-55187060 (+), ENSDART00000136764 si:ch211-202h22.8 chr1:55178202-55188176 (+), ENSDART00000109342 si:ch211-202h22.8 chr1:55178782-55187038 (+)	chr1:55177535-55188176	+	2	Annotated and revised	2	1138	1131	chr1:55187038-55188169	Known 3'UTR	156	1	55188169	156	Novel 3'UTR (Shortened)	135	1	55187969	135
si:ch211-205a14.4	ENSDART00000132805 si:ch211-205a14.4 chr1:37844660-37851599 (+), ENSDART00000104410 si:ch211-205a14.4 chr1:37844660-37846408 (+)	chr1:37844660-37851599	+	2	No 3P tags	-	103	103
CABZ01079541.1	ENSDART00000129557 CABZ01079541.1 chr1:2809160-2821811 (+)	chr1:2809160-2821811	+	0	No 3P tags	-	0	0
OXGR1 (4 of 4)	ENSDART00000058878 OXGR1 (4 of 4) chr1:1817215-1818205 (-)	chr1:1817215-1818205	-	0	No 3P tags	-	0	0
cab39l	ENSDART00000132861 cab39l chr1:47095608-47109156 (+), ENSDART00000053240 cab39l chr1:47095870-47114390 (+)	chr1:47095608-47114390	+	1	Only revised	5	1661	3177		Novel 3'UTR (Extended)	107	1	47115906	107	Novel 3'UTR (Shortened)	2997	4	47112821	195	47113293	8	47113973	1238	47114274	1556
zgc:101859	ENSDART00000023642 zgc:101859 chr1:44877400-44890170 (-), ENSDART00000110148 zgc:101859 chr1:44877397-44890185 (-), ENSDART00000126631 zgc:101859 chr1:44878347-44890178 (-)	chr1:44877397-44890185	-	1	Only annotated	1	941	469		Known 3'UTR	379	1	44877400	379
CU302202.2	ENSDART00000113371 CU302202.2 chr1:58374525-58385872 (-)	chr1:58374525-58387678	-	1	Only annotated	2	4000	3994	chr1:58374531-58378525	Known 3'UTR	459	2	58374531	445	58374550	14
poll	ENSDART00000057880 poll chr1:31111813-31126315 (+), ENSDART00000127666 poll chr1:31111742-31126225 (+)	chr1:31111742-31126315	+	2	Annotated and revised	13	316	1888	chr1:31125999-31126225	Known 3'UTR	1303	6	31126137	13	31126214	15	31126225	801	31126247	57	31126313	122	31126332	295	Novel 3'UTR (Extended)	170	6	31126657	9	31126680	5	31126733	18	31126745	22	31126833	20	31127887	96	Novel 3'UTR (Shortened)	11	1	31126118	11
si:ch211-165a10.5	ENSDART00000140237 si:ch211-165a10.5 chr1:44487601-44489839 (-)	chr1:44487601-44489839	-	1	No 3P tags	-	263	263
qdprb2	ENSDART00000123789 qdprb2 chr1:23157507-23160836 (+)	chr1:23157507-23160836	+	1	Only annotated	3	44	43	chr1:23160792-23160835	Known 3'UTR	1461	3	23160798	97	23160815	40	23160835	1324
tuba8l2	ENSDART00000040204 tuba8l2 chr1:4291629-4308270 (+)	chr1:4291629-4308270	+	1	Only annotated	1	61	61	chr1:4308209-4308270	Known 3'UTR	3505	1	4308270	3505
arl13b	ENSDART00000122316 arl13b chr1:33300916-33316897 (+), ENSDART00000102184 arl13b chr1:33300924-33327476 (+)	chr1:33300916-33327476	+	2	Only annotated	2	1040	1039		Known 3'UTR	186	2	33327452	34	33327475	152
C1H4orf43	ENSDART00000005733 C1H4orf43 chr1:18501264-18505933 (-)	chr1:18501264-18505933	-	2	Only revised	5	1412	3811	chr1:18502474-18502676	Novel 3'UTR (Extended)	6	1	18498865	6	Novel 3'UTR (Shortened)	1705	4	18502288	24	18502344	7	18502463	11	18502474	1663
taf5	ENSDART00000015007 taf5 chr1:49921679-49938546 (+)	chr1:49921679-49938546	+	1	Annotated and revised	4	401	2442	chr1:49938145-49938543	Known 3'UTR	215	2	49938543	207	49938554	8	Novel 3'UTR (Extended)	17	2	49940056	12	49940587	5
BX284640.1	ENSDART00000129658 BX284640.1 chr1:55890244-55891356 (+)	chr1:55890244-55891356	+	0	None associated with 3' UTR	0	0	0
zgc:172106	ENSDART00000128979 zgc:172106 chr1:55833809-55838971 (+)	chr1:55833809-55838971	+	1	Only extended	1	437	1313	chr1:55838534-55839847	Novel 3'UTR (Extended)	13	1	55839847	13
lsm6	ENSDART00000053773 lsm6 chr1:35902875-35912115 (+), ENSDART00000147458 lsm6 chr1:35902895-35912114 (+)	chr1:35902875-35912115	+	1	Annotated and revised	5	189	3438	chr1:35911926-35912114	Known 3'UTR	1944	3	35912102	4	35912114	1913	35912199	27	Novel 3'UTR (Extended)	10	1	35915364	10	Novel 3'UTR (Shortened)	33	1	35912006	33
MRI1	ENSDART00000140153 MRI1 chr1:55730477-55735431 (-), ENSDART00000111671 MRI1 chr1:55730478-55750050 (-)	chr1:55730477-55750050	-	1	Annotated and revised	5	474	6855	chr1:55724096-55730951	Known 3'UTR	74	1	55730478	74	Novel 3'UTR (Extended)	1834	4	55724096	1707	55726911	9	55729114	16	55729739	102
erbb4a	ENSDART00000145822 erbb4a chr1:5694954-5802766 (+), ENSDART00000092118 erbb4a chr1:5694954-5803070 (+)	chr1:5694954-5803070	+	1	Only extended	1	304	5155	chr1:5802766-5807921	Novel 3'UTR (Extended)	101	1	5807921	101
rfc1	ENSDART00000146575 rfc1 chr1:22039765-22042107 (-), ENSDART00000077055 rfc1 chr1:22017138-22042622 (-), ENSDART00000121783 rfc1 chr1:22017138-22041825 (-), ENSDART00000143948 rfc1 chr1:22017186-22042663 (-), ENSDART00000114600 rfc1 chr1:22017769-22041747 (-)	chr1:22017138-22042663	-	2	Annotated and revised	3	583	745		Known 3'UTR	2934	2	22017138	2906	22017676	28	Novel 3'UTR (Extended)	13	1	22017024	13
poglut1	NM_170040 CG31139 chr1:27805706-27816188 (-), ENSDART00000075500 poglut1 chr1:27805646-27820094 (-)	chr1:27805646-27820094	-	0	Annotated and revised	5	0	1945	chr1:27805293-27805646	Known 3'UTR	9	1	27805617	9	Novel 3'UTR (Extended)	720	4	27803742	4	27803761	4	27805274	15	27805293	697
gab1	ENSDART00000053806 gab1 chr1:35203451-35317473 (+), ENSDART00000101740 gab1 chr1:35203532-35317772 (+), ENSDART00000140724 gab1 chr1:35202951-35317774 (+)	chr1:35202951-35317774	+	2	Annotated and revised	5	1739	3825	chr1:35316035-35317777	Known 3'UTR	920	3	35317745	12	35317758	343	35317777	565	Novel 3'UTR (Extended)	4	1	35319860	4	Novel 3'UTR (Shortened)	35	1	35316804	35
zgc:73228	ENSDART00000078610 zgc:73228 chr1:17553573-17558701 (+)	chr1:17553573-17558701	+	1	Only extended	6	89	5000	chr1:17558612-17563612	Novel 3'UTR (Extended)	1358	6	17559188	7	17559325	35	17559337	140	17559352	5	17559591	54	17563612	1117
prdx2	ENSDART00000040397 prdx2 chr1:52215802-52223814 (+)	chr1:52215802-52223814	+	1	Only annotated	1	311	308	chr1:52223503-52223811	Known 3'UTR	80756	1	52223811	80756
mnd1	ENSDART00000141648 mnd1 chr1:24035511-24073635 (+), ENSDART00000054265 mnd1 chr1:24035505-24072164 (+)	chr1:24035505-24073635	+	2	Only extended	6	743	702		Novel 3'UTR (Extended)	1335	6	24073812	4	24073838	6	24073999	1077	24074017	46	24074034	6	24074044	196
capn9	NM_023709 Capn9 chr1:54451674-54473592 (-), ENSDART00000007732 capn9 chr1:54448597-54473846 (-)	chr1:54448597-54473846	-	1	Annotated and revised	5	507	671	chr1:54448716-54449104	Known 3'UTR	29	3	54448587	2	54448595	18	54448643	9	Novel 3'UTR (Extended)	84	1	54448433	84	Novel 3'UTR (Shortened)	533	1	54448716	533
MUC17 (6 of 6)	ENSDART00000143142 MUC17 (6 of 6) chr1:45631880-45632851 (-), ENSDART00000034549 MUC17 (6 of 6) chr1:45628898-45632879 (-)	chr1:45628898-45632879	-	1	Annotated and revised	5	536	534		Known 3'UTR	611	4	45628900	202	45628939	19	45628950	384	45628963	6	Novel 3'UTR (Shortened)	7	1	45629012	7
SLC25A10	ENSDART00000037576 SLC25A10 chr1:56969372-56981222 (-), NM_001127291 SLC25A10 chr1:56970888-56981216 (-)	chr1:56969372-56981222	-	1	Annotated and revised	5	1844	1844	chr1:56969372-56971216	Known 3'UTR	612	2	56969361	13	56969372	599	Novel 3'UTR (Shortened)	20	3	56970178	7	56970385	6	56970452	7
KIF16B	ENSDART00000131674 KIF16B chr1:51742112-51743732 (-), ENSDART00000109333 KIF16B chr1:51739028-51779390 (-), ENSDART00000140079 KIF16B chr1:51754190-51771124 (-), NM_001054627 Os02g0742900 chr1:51773468-51776397 (-)	chr1:51739028-51779390	-	1	Only annotated	1	3084	3084		Known 3'UTR	973	1	51739028	973
si:ch211-165a10.1	ENSDART00000134099 si:ch211-165a10.1 chr1:44511283-44513915 (-)	chr1:44511283-44513915	-	0	No 3P tags	-	0	0
BX530018.2	NM_001045702 ociad1 chr1:13308478-13310984 (-), ENSDART00000123895 BX530018.2 chr1:13300930-13311472 (-)	chr1:13300930-13311472	-	1	Only revised	2	1205	488	chr1:13303141-13303257	Novel 3'UTR (Extended)	7	1	13305543	7	Novel 3'UTR (Shortened)	313	1	13303141	313
igf2bp2b	ENSDART00000137127 igf2bp2b chr1:29430690-29460860 (-), ENSDART00000088166 igf2bp2b chr1:29430747-29444484 (-), ENSDART00000088170 igf2bp2b chr1:29430692-29561482 (-), ENSDART00000141457 igf2bp2b chr1:29442535-29498284 (-), ENSDART00000141303 igf2bp2b chr1:29430626-29445495 (-), ENSDART00000136148 igf2bp2b chr1:29426875-29498343 (-), ENSDART00000144916 igf2bp2b chr1:29442471-29484141 (-)	chr1:29426875-29561482	-	3	Annotated and revised	7	3872	4221		Known 3'UTR	966	2	29426870	8	29426885	958	Novel 3'UTR (Extended)	6	1	29426526	6	Novel 3'UTR (Shortened)	58	4	29427098	26	29428565	8	29429874	20	29430451	4
CABZ01049362.1	ENSDART00000109498 CABZ01049362.1 chr1:57301009-57318945 (+)	chr1:57301009-57318945	+	0	Only extended	1	0	2666	chr1:57318945-57321611	Novel 3'UTR (Extended)	9	1	57321611	9
b3gntl1	ENSDART00000063750 b3gntl1 chr1:57653317-57669614 (-), ENSDART00000143018 b3gntl1 chr1:57663336-57670472 (-), ENSDART00000104222 b3gntl1 chr1:57653795-57670482 (-)	chr1:57653317-57670482	-	2	Annotated and revised	7	478	2569		Known 3'UTR	52	2	57653261	4	57653318	48	Novel 3'UTR (Extended)	309	5	57651226	85	57651800	108	57652933	5	57652946	55	57653163	56
grin2ab	ENSDART00000103652 grin2ab chr1:7839803-7983514 (-), ENSDART00000137900 grin2ab chr1:7841707-7993986 (-)	chr1:7839803-7993986	-	2	Annotated and revised	6	2265	2364	chr1:7840307-7842068	Known 3'UTR	390	3	7839704	53	7839803	333	7841684	4	Novel 3'UTR (Shortened)	1027	3	7840178	101	7840307	878	7840317	48
CR381601.2	ENSDART00000103323 CR381601.2 chr1:13427655-13429261 (+)	chr1:13427655-13429261	+	0	No 3P tags	-	0	0
si:dkey-27h10.2	ENSDART00000136157 si:dkey-27h10.2 chr1:35373887-35403093 (-), ENSDART00000145291 si:dkey-27h10.2 chr1:35399069-35403730 (-), ENSDART00000133813 si:dkey-27h10.2 chr1:35373887-35403729 (-)	chr1:35373887-35403730	-	1	Only extended	3	71	1109		Novel 3'UTR (Extended)	215	3	35370843	165	35371221	37	35371453	13
C1H3orf70 (2 of 2)	ENSDART00000125759 C1H3orf70 (2 of 2) chr1:29331167-29354278 (-)	chr1:29331167-29354278	-	1	Only annotated	1	3680	3678	chr1:29331169-29334847	Known 3'UTR	426	1	29331169	426
CU896661.2	ENSDART00000097626 CU896661.2 chr1:1299843-1314361 (+)	chr1:1299843-1314361	+	1	Only annotated	2	212	211	chr1:1314149-1314360	Known 3'UTR	134	2	1314360	86	1314397	48
F8A2	ENSDART00000110390 F8A2 chr1:45803333-45812544 (-), ENSDART00000148289 F8A2 chr1:45803521-45812463 (-), ENSDART00000034615 F8A2 chr1:45803322-45812486 (-), ENSDART00000149183 F8A2 chr1:45807746-45812453 (-)	chr1:45803322-45812544	-	2	Only annotated	5	419	517		Known 3'UTR	1411	5	45803224	60	45803270	5	45803328	1334	45803369	8	45803450	4
pane1	ENSDART00000035725 pane1 chr1:55700410-55705897 (-)	chr1:55700410-55705897	-	1	Only annotated	1	240	239	chr1:55700411-55700650	Known 3'UTR	1814	1	55700411	1814
atp1a1a.2	ENSDART00000006449 atp1a1a.2 chr1:1546142-1553618 (+), NM_001173048 Atp1a1 chr1:1546462-1552905 (+)	chr1:1546142-1553618	+	1	Only annotated	2	99	107	chr1:1553519-1553626	Known 3'UTR	774	2	1553614	47	1553626	727
gucy1b3	ENSDART00000129471 gucy1b3 chr1:24659047-24699059 (+), NM_079864 Gycbeta100B chr1:24659640-24696683 (+)	chr1:24659047-24699059	+	1	Only extended	2	120	1269	chr1:24698939-24700208	Novel 3'UTR (Extended)	304	2	24696948	5	24700208	299
SLC5A3 (2 of 2)	NM_053715 Slc5a3 chr1:1781885-1783511 (+), ENSDART00000008332 SLC5A3 (2 of 2) chr1:1781870-1783886 (+)	chr1:1781870-1783886	+	0	Only extended	1	0	2771	chr1:1783886-1786282	Novel 3'UTR (Extended)	21	1	1786282	21
SGCZ	NM_001108875 Sgcz chr1:14350661-14523900 (-), ENSDART00000130418 SGCZ chr1:14345878-14594464 (-)	chr1:14345878-14594464	-	0	Only extended	2	0	363	chr1:14345515-14345878	Novel 3'UTR (Extended)	121	2	14345515	113	14345653	8
asb5	ENSDART00000075230 asb5 chr1:39159394-39171119 (-), ENSDART00000149080 asb5 chr1:39161660-39169909 (-)	chr1:39159394-39171119	-	1	Only annotated	1	507	512		Known 3'UTR	272	1	39159389	272
rhoh	NM_001126963 rhoh chr1:22172519-22173032 (+), ENSDART00000102646 rhoh chr1:22172498-22173086 (+)	chr1:22172498-22173086	+	0	Only extended	2	0	561	chr1:22173086-22173324	Novel 3'UTR (Extended)	9	2	22173324	5	22173724	4
RAC1 (6 of 6)	ENSDART00000063774 RAC1 (6 of 6) chr1:57846075-57848224 (+), NM_001032522 rhou chr1:57848937-57849153 (+), NM_138542 Rhov chr1:57846073-57849255 (+)	chr1:57846073-57849255	+	1	Annotated and revised	2	1584	1584	chr1:57846640-57846676	Known 3'UTR	27	1	57848224	27	Novel 3'UTR (Shortened)	41	1	57846676	41
atp1a1a.5	ENSDART00000006013 atp1a1a.5 chr1:1594949-1606890 (+), NM_001082027 ATP12A chr1:1595252-1603319 (+)	chr1:1594949-1606890	+	1	No 3P tags	-	680	680
clock3	ENSDART00000133959 clock3 chr1:18174898-18208348 (+), ENSDART00000012552 clock3 chr1:18176102-18207958 (+), ENSDART00000103119 clock3 chr1:18176102-18207958 (+)	chr1:18174898-18208348	+	2	Only extended	3	395	2665		Novel 3'UTR (Extended)	427	3	18208650	8	18210379	19	18210602	400
sh3pxd2aa	ENSDART00000084457 sh3pxd2aa chr1:48082807-48180364 (+), ENSDART00000109244 sh3pxd2aa chr1:48013415-48188418 (+)	chr1:48013415-48188418	+	1	Only annotated	1	8054	8054	chr1:48180364-48188418	Known 3'UTR	1327	1	48188418	1327
palb2	ENSDART00000142132 palb2 chr1:8208418-8210129 (-), ENSDART00000113013 palb2 chr1:8201106-8206220 (-), ENSDART00000128550 palb2 chr1:8201288-8209827 (-)	chr1:8201106-8210129	-	1	Annotated and revised	4	182	462		Known 3'UTR	2263	3	8201081	343	8201094	1909	8201154	11	Novel 3'UTR (Extended)	20	1	8200826	20
pds5a	ENSDART00000143014 pds5a chr1:22117856-22144489 (-), ENSDART00000126785 pds5a chr1:22097263-22144623 (-), ENSDART00000102654 pds5a chr1:22097392-22144614 (-), ENSDART00000033078 pds5a chr1:22097392-22144614 (-)	chr1:22097263-22144623	-	2	Annotated and revised	5	538	738		Known 3'UTR	3847	4	22097381	77	22097392	3023	22097445	731	22097464	16	Novel 3'UTR (Extended)	114	1	22097063	114
dpy30	ENSDART00000024743 dpy30 chr1:51548879-51551650 (+)	chr1:51548879-51551650	+	1	Only annotated	1	138	136	chr1:51551512-51551648	Known 3'UTR	13770	1	51551648	13770
CABZ01059415.2	ENSDART00000110690 CABZ01059415.2 chr1:57207006-57211253 (-)	chr1:57207006-57211253	-	0	None associated with 3' UTR	0	0	0
GPA33 (1 of 2)	ENSDART00000059335 GPA33 (1 of 2) chr1:544504-550272 (+)	chr1:544504-550272	+	1	Annotated and revised	4	1336	1336	chr1:548936-550272	Known 3'UTR	2821	1	550272	2821	Novel 3'UTR (Shortened)	192	3	549680	23	549801	19	549896	150
CASKIN1 (3 of 3)	ENSDART00000140787 CASKIN1 (3 of 3) chr1:6888660-6890971 (+)	chr1:6888660-6890971	+	1	Only extended	1	486	1705	chr1:6890485-6892190	Novel 3'UTR (Extended)	759	1	6892190	759
si:dkeyp-72g6.2	ENSDART00000136556 si:dkeyp-72g6.2 chr1:19718014-19719816 (+)	chr1:19718014-19719816	+	1	No 3P tags	-	455	455
cpo	NM_173077 CPO chr1:4469880-4475742 (+), ENSDART00000109756 cpo chr1:4464894-4476319 (+)	chr1:4464894-4476319	+	1	Annotated and revised	2	445	438	chr1:4475874-4476312	Known 3'UTR	176	1	4476312	176	Novel 3'UTR (Shortened)	5	1	4475947	5
TMEM134	ENSDART00000135791 TMEM134 chr1:40245750-40258387 (-), ENSDART00000035739 TMEM134 chr1:40245068-40258446 (-)	chr1:40245068-40258446	-	2	Annotated and revised	2	764	761	chr1:40245071-40245832	Known 3'UTR	1566	1	40245071	1566	Novel 3'UTR (Shortened)	5	1	40245410	5
CCKBR (2 of 2)	ENSDART00000109224 CCKBR (2 of 2) chr1:28553367-28598712 (-)	chr1:28553367-28598712	-	1	Annotated and revised	4	160	5008	chr1:28548519-28553527	Known 3'UTR	85	2	28553281	5	28553369	80	Novel 3'UTR (Extended)	442	2	28548519	425	28552314	17
cdadc1	ENSDART00000053232 cdadc1 chr1:47116303-47130073 (-), ENSDART00000148893 cdadc1 chr1:47114112-47130055 (-)	chr1:47114112-47130073	-	2	Only annotated	4	531	531		Known 3'UTR	226	4	47114078	6	47114095	20	47114112	196	47116305	4
CR388002.2	ENSDART00000128955 CR388002.2 chr1:12883122-12899421 (-)	chr1:12883122-12899421	-	0	None associated with 3' UTR	0	0	0
trpc5	ENSDART00000040502 trpc5 chr1:9662984-9754031 (-), ENSDART00000131294 trpc5 chr1:9662984-9796448 (-), ENSDART00000140495 trpc5 chr1:9685679-9796448 (-)	chr1:9662984-9796448	-	1	Annotated and revised	3	382	509		Known 3'UTR	21	1	9685687	21	Novel 3'UTR (Extended)	5	1	9662475	5	Novel 3'UTR (Shortened)	5	1	9685958	5
serhl	ENSDART00000042158 serhl chr1:46120977-46133467 (-)	chr1:46120977-46133467	-	1	Annotated and revised	3	473	474	chr1:46120976-46121450	Known 3'UTR	3849	1	46120976	3849	Novel 3'UTR (Shortened)	31	2	46121160	23	46121202	8
ankrd37	NM_001017037 ankrd37 chr1:16437655-16437796 (+), ENSDART00000103236 ankrd37 chr1:16437320-16440668 (+)	chr1:16437320-16440668	+	1	Only extended	4	438	1866	chr1:16440230-16441596	Novel 3'UTR (Extended)	138	4	16441174	5	16441493	4	16441561	4	16441596	125
si:dkeyp-75b4.9	ENSDART00000019294 si:dkeyp-75b4.9 chr1:9061383-9066911 (-), ENSDART00000144565 si:dkeyp-75b4.9 chr1:9062758-9064924 (-)	chr1:9061383-9066911	-	0	Only extended	1	0	1062		Novel 3'UTR (Extended)	33	1	9060321	33
glrba	ENSDART00000148863 glrba chr1:20206146-20261203 (-), ENSDART00000102790 glrba chr1:20205661-20266484 (-)	chr1:20205661-20266484	-	1	Annotated and revised	2	485	489	chr1:20205657-20206146	Known 3'UTR	422	1	20205657	422	Novel 3'UTR (Shortened)	10	1	20205763	10
GRK4 (2 of 2)	ENSDART00000144137 GRK4 (2 of 2) chr1:11376933-11382795 (+), ENSDART00000138557 GRK4 (2 of 2) chr1:11316762-11387525 (+), ENSDART00000066638 GRK4 (2 of 2) chr1:11316762-11387524 (+)	chr1:11316762-11387525	+	2	Annotated and revised	6	5235	5232		Known 3'UTR	155	2	11387522	94	11387532	61	Novel 3'UTR (Shortened)	314	4	11382475	97	11382675	32	11384277	172	11386130	13
CABZ01034531.1	ENSDART00000124836 CABZ01034531.1 chr1:58405378-58408963 (+)	chr1:58405378-58408963	+	0	None associated with 3' UTR	0	0	0
EARS2	ENSDART00000063824 EARS2 chr1:60061324-60068255 (-)	chr1:60061324-60068255	-	0	Only annotated	1	0	33	chr1:60061291-60061324	Known 3'UTR	450	1	60061291	450
si:dkey-22i16.9	ENSDART00000148883 si:dkey-22i16.9 chr1:44356399-44365925 (-)	chr1:44356399-44365925	-	1	Only annotated	1	2468	2487	chr1:44356380-44358867	Known 3'UTR	43	1	44356380	43
DLC1	ENSDART00000109970 DLC1 chr1:14017726-14055663 (-)	chr1:14017726-14055663	-	2	Annotated and revised	2	2505	2505	chr1:14017726-14020231	Known 3'UTR	763	1	14017726	763	Novel 3'UTR (Shortened)	9	1	14017938	9
BX000690.1	ENSDART00000122503 BX000690.1 chr1:14934071-14962132 (+), NM_001004212 Tusc3 chr1:14822877-14958311 (+)	chr1:14822877-14962132	+	1	Only annotated	1	111	108	chr1:14962021-14962129	Known 3'UTR	626	1	14962129	626
HPGD	ENSDART00000018533 HPGD chr1:38808061-38824488 (-)	chr1:38808061-38824488	-	1	Annotated and revised	2	410	410	chr1:38808061-38808471	Known 3'UTR	599	1	38808061	599	Novel 3'UTR (Shortened)	5	1	38808177	5
si:dkey-9i23.4	ENSDART00000073717 si:dkey-9i23.4 chr1:45223134-45225532 (+)	chr1:45223134-45225532	+	1	None associated with 3' UTR	0	100	0
sgms2	ENSDART00000141476 sgms2 chr1:50441222-50454373 (-), ENSDART00000074388 sgms2 chr1:50441222-50452060 (-), ENSDART00000138301 sgms2 chr1:50451629-50457726 (-), ENSDART00000143398 sgms2 chr1:50444342-50454565 (-)	chr1:50441222-50457726	-	0	Only extended	1	0	517		Novel 3'UTR (Extended)	15	1	50440705	15
faah2a	ENSDART00000037553 faah2a chr1:40629793-40650948 (+)	chr1:40629793-40650948	+	1	Annotated and revised	4	694	1393	chr1:40650254-40650937	Known 3'UTR	319	2	40650937	303	40650994	16	Novel 3'UTR (Extended)	5	1	40651647	5	Novel 3'UTR (Shortened)	37	1	40650591	37
C3 (3 of 9)	ENSDART00000064202 C3 (3 of 9) chr1:56614610-56626806 (-), ENSDART00000075469 C3 (3 of 9) chr1:56576601-56626806 (-)	chr1:56576601-56626806	-	1	Only annotated	3	306	311		Known 3'UTR	663	3	56576596	620	56576606	26	56576631	17
PTGFRN (2 of 2)	ENSDART00000110331 PTGFRN (2 of 2) chr1:1704761-1756978 (+)	chr1:1704761-1756978	+	0	Only extended	3	0	5366	chr1:1756978-1762344	Novel 3'UTR (Extended)	149	3	1759143	7	1762322	22	1762344	120
si:ch211-15j1.4	ENSDART00000134826 si:ch211-15j1.4 chr1:58825471-58826901 (+)	chr1:58825471-58826901	+	0	No 3P tags	-	0	0
pus10	ENSDART00000114689 pus10 chr1:54275482-54291088 (+), NM_001091946 pus10 chr1:54282723-54290576 (+)	chr1:54275482-54291088	+	1	Only annotated	2	138	136	chr1:54290950-54291086	Known 3'UTR	884	2	54291086	733	54291097	151
EVI5L	ENSDART00000125037 EVI5L chr1:45673096-45717877 (+), ENSDART00000125276 EVI5L chr1:45673094-45706172 (+), ENSDART00000074683 EVI5L chr1:45691636-45760950 (+)	chr1:45673094-45760950	+	0	Only revised	11	0	11646		Novel 3'UTR (Extended)	16	1	45761072	16	Novel 3'UTR (Alternative last exon)	437	10	45739655	26	45741721	26	45741770	4	45742783	60	45742800	6	45745317	50	45745603	5	45745818	206	45749122	8	45750835	46
RAP2A (1 of 2)	NM_001012572 RAP2C chr1:1979118-1996851 (+), ENSDART00000058877 RAP2A (1 of 2) chr1:1979148-1996905 (+)	chr1:1979118-1996905	+	1	Only extended	5	34	5946	chr1:1996905-2001715	Novel 3'UTR (Extended)	172	5	2001715	140	2001987	12	2001999	9	2002592	4	2002763	7
NXNL1	ENSDART00000143829 NXNL1 chr1:58692866-58695586 (-), ENSDART00000073776 NXNL1 chr1:58692866-58695106 (-)	chr1:58692866-58695586	-	0	None associated with 3' UTR	0	0	0
si:ch211-145b13.5	ENSDART00000054202 si:ch211-145b13.5 chr1:24894066-24906266 (-)	chr1:24894066-24906266	-	1	Only annotated	1	1744	1760	chr1:24894050-24895810	Known 3'UTR	126	1	24894050	126
BX908759.5	ENSDART00000100509 BX908759.5 chr1:57825371-57829848 (-)	chr1:57825371-57829848	-	0	Only extended	1	0	3544	chr1:57821827-57825371	Novel 3'UTR (Extended)	13	1	57821827	13
A2LD1 (1 of 3)	ENSDART00000103785 A2LD1 (1 of 3) chr1:2203808-2206121 (-)	chr1:2203808-2206121	-	1	Only extended	2	1071	1917	chr1:2202962-2204879	Novel 3'UTR (Extended)	24	2	2202962	16	2203286	8
sparcl1	NM_001104901 sparcl1 chr1:37255113-37268081 (+), ENSDART00000083593 sparcl1 chr1:37241623-37268289 (+)	chr1:37241623-37268289	+	1	Only extended	2	20	407	chr1:37268269-37268643	Novel 3'UTR (Extended)	83	2	37268595	15	37268643	68
LRAT (2 of 2)	NM_001091928 lrat chr1:9294727-9295126 (+), ENSDART00000114436 LRAT (2 of 2) chr1:9294557-9300000 (+)	chr1:9294557-9300000	+	1	Only extended	1	91	548	chr1:9299909-9300297	Novel 3'UTR (Extended)	162	1	9300297	162
chrnb3a	ENSDART00000074678 chrnb3a chr1:21162892-21186136 (-)	chr1:21162892-21186136	-	1	Annotated and revised	9	482	4085	chr1:21162895-21163374	Known 3'UTR	328	2	21162880	43	21162895	285	Novel 3'UTR (Extended)	308	6	21159289	7	21159823	56	21159834	98	21160672	26	21161848	107	21162765	14	Novel 3'UTR (Shortened)	11	1	21163139	11
si:dkey-27f16.4	ENSDART00000138992 si:dkey-27f16.4 chr1:40700594-40722159 (+), ENSDART00000101664 si:dkey-27f16.4 chr1:40700980-40721706 (+)	chr1:40700594-40722159	+	1	Only Novel 3'UTR (Shortened)	1	453	254	chr1:40721706-40721960	Novel 3'UTR (Shortened)	54	1	40721960	54
NSUN3	ENSDART00000131664 NSUN3 chr1:33329850-33355461 (+), ENSDART00000023768 NSUN3 chr1:33329895-33355459 (+)	chr1:33329850-33355461	+	1	Only revised	7	459	1535	chr1:33355002-33355016	Novel 3'UTR (Extended)	60	5	33355810	13	33356041	17	33356167	13	33356182	11	33356537	6	Novel 3'UTR (Shortened)	101	2	33355005	10	33355016	91
mcoln1	ENSDART00000019646 mcoln1 chr1:46142583-46171266 (+), ENSDART00000146101 mcoln1 chr1:46142379-46171267 (+)	chr1:46142379-46171267	+	1	Annotated and revised	8	3670	9404	chr1:46167597-46171266	Known 3'UTR	357	1	46171266	357	Novel 3'UTR (Extended)	26	2	46175874	9	46177054	17	Novel 3'UTR (Shortened)	31	5	46167914	7	46167935	5	46168269	4	46168578	7	46170379	8
xpo1a	ENSDART00000108906 xpo1a chr1:54220652-54244553 (-)	chr1:54220652-54244553	-	0	Only extended	2	0	1101	chr1:54219989-54220652	Novel 3'UTR (Extended)	4729	2	54219551	1034	54219989	3695
LRBA	ENSDART00000146960 LRBA chr1:22749491-23029334 (-), ENSDART00000025224 LRBA chr1:22694786-23124646 (-), ENSDART00000142740 LRBA chr1:23038401-23124616 (-)	chr1:22694786-23124646	-	1	Only annotated	1	1332	1332		Known 3'UTR	1547	1	22694786	1547
fhdc1	ENSDART00000134470 fhdc1 chr1:24256913-24296137 (-), ENSDART00000111686 fhdc1 chr1:24256265-24277420 (-)	chr1:24256265-24296137	-	2	Annotated and revised	4	2476	2730	chr1:24256229-24258741	Known 3'UTR	57	3	24256229	45	24256258	3	24256271	9	Novel 3'UTR (Extended)	10	1	24256011	10
si:ch73-343l4.5	ENSDART00000109353 si:ch73-343l4.5 chr1:56420676-56430629 (+)	chr1:56420676-56430629	+	0	No 3P tags	-	0	0
ppp2r2c	ENSDART00000075749 ppp2r2c chr1:13169089-13194741 (+), ENSDART00000017679 ppp2r2c chr1:13168436-13191598 (+), ENSDART00000141592 ppp2r2c chr1:13168574-13177780 (+)	chr1:13168436-13194741	+	2	Annotated and revised	7	3837	3805		Known 3'UTR	852	3	13194709	512	13194731	8	13194741	332	Novel 3'UTR (Shortened)	44	4	13191470	4	13191873	7	13192655	28	13194101	5
mycbpap	ENSDART00000100500 mycbpap chr1:57712476-57736637 (-), ENSDART00000149688 mycbpap chr1:57700572-57748929 (-), ENSDART00000127828 mycbpap chr1:57700713-57736496 (-), ENSDART00000149397 mycbpap chr1:57700998-57706469 (-)	chr1:57700572-57748929	-	2	Annotated and revised	3	166	1203		Known 3'UTR	530	1	57700621	530	Novel 3'UTR (Extended)	92	2	57699510	12	57700452	80
THUMPD1	ENSDART00000067096 THUMPD1 chr1:60036455-60040027 (+)	chr1:60036455-60040027	+	0	Only extended	1	0	213	chr1:60040027-60040240	Novel 3'UTR (Extended)	301	1	60040240	301
si:busm1-105l16.2	ENSDART00000104382 si:busm1-105l16.2 chr1:46998549-47000856 (-)	chr1:46998549-47000856	-	0	No 3P tags	-	0	0
CABZ01036814.1	ENSDART00000005694 CABZ01036814.1 chr1:56517095-56534610 (-)	chr1:56517095-56534610	-	0	No 3P tags	-	0	0
HECW2 (1 of 2)	ENSDART00000090286 HECW2 (1 of 2) chr1:5170256-5228525 (+), NM_172655 Hecw2 chr1:5170268-5192541 (+)	chr1:5170256-5228525	+	0	Only extended	3	0	3663	chr1:5228525-5232188	Novel 3'UTR (Extended)	274	3	5231321	40	5231581	13	5232188	221
BX927114.5	ENSDART00000123618 BX927114.5 chr1:58493150-58515586 (+)	chr1:58493150-58515586	+	0	Only extended	1	0	954	chr1:58515586-58516540	Novel 3'UTR (Extended)	6	1	58516540	6
CACNA1H (2 of 2)	ENSDART00000103611 CACNA1H (2 of 2) chr1:7381100-7479825 (+), ENSDART00000141604 CACNA1H (2 of 2) chr1:7331802-7477477 (+)	chr1:7331802-7479825	+	0	Only extended	3	0	6149		Novel 3'UTR (Extended)	27	3	7482949	7	7484985	12	7485974	8
il15	ENSDART00000134222 il15 chr1:53730383-53755437 (-)	chr1:53730383-53755437	-	1	Only annotated	1	295	292	chr1:53730386-53730678	Known 3'UTR	809	1	53730386	809
arhgef7b	ENSDART00000042086 arhgef7b chr1:46464644-46517372 (+), ENSDART00000108528 arhgef7b chr1:46429124-46517387 (+)	chr1:46429124-46517387	+	1	Annotated and revised	6	1055	1041	chr1:46516332-46517373	Known 3'UTR	405	2	46517373	384	46517387	21	Novel 3'UTR (Shortened)	29	3	46517137	5	46517171	9	46517242	15	Novel 3'UTR (Alternative last exon)	24	1	46465135	24
zgc:152968	ENSDART00000053780 zgc:152968 chr1:35694223-35701357 (+), ENSDART00000130013 zgc:152968 chr1:35694337-35706220 (+), ENSDART00000075160 zgc:152968 chr1:35694337-35706220 (+), ENSDART00000139636 zgc:152968 chr1:35694007-35706512 (+)	chr1:35694007-35706512	+	1	Annotated and revised	10	292	2124		Known 3'UTR	212	7	35706248	92	35706270	11	35706295	3	35706311	5	35706461	4	35706477	7	35706509	90	Novel 3'UTR (Extended)	15	1	35707600	15	Novel 3'UTR (Shortened)	18	2	35706340	11	35706380	7
si:dkey-245p14.4	ENSDART00000103089 si:dkey-245p14.4 chr1:18277038-18279254 (+)	chr1:18277038-18279254	+	1	Only extended	1	293	1127	chr1:18278961-18280088	Novel 3'UTR (Extended)	230	1	18280088	230
si:dkey-27n6.5	ENSDART00000135469 si:dkey-27n6.5 chr1:37487968-37491731 (-)	chr1:37487968-37491731	-	1	None associated with 3' UTR	0	791	0
spcs3	NM_029541 Arxes1 chr1:39172838-39174686 (+), ENSDART00000129714 spcs3 chr1:39172749-39176597 (+)	chr1:39172749-39176597	+	1	Only annotated	1	77	79	chr1:39176520-39176599	Known 3'UTR	10041	1	39176599	10041
pcdh10a	ENSDART00000105494 pcdh10a chr1:12097483-12128586 (-), ENSDART00000127020 pcdh10a chr1:12120499-12126855 (-), ENSDART00000076443 pcdh10a chr1:12097468-12128416 (-)	chr1:12097468-12128586	-	0	Only extended	2	0	248		Novel 3'UTR (Extended)	99	2	12097235	95	12097367	4
MFAP4 (11 of 12)	ENSDART00000138870 MFAP4 (11 of 12) chr1:59886270-59887406 (-)	chr1:59886270-59887406	-	0	Only extended	1	0	155	chr1:59886115-59886270	Novel 3'UTR (Extended)	425	1	59886115	425
zgc:175214	ENSDART00000137357 zgc:175214 chr1:49987601-50004515 (-), ENSDART00000030435 zgc:175214 chr1:49987601-50003937 (-)	chr1:49987601-50004515	-	1	Annotated and revised	3	2895	2896	chr1:49987600-49990496	Known 3'UTR	583	2	49987559	85	49987600	498	Novel 3'UTR (Shortened)	85	1	49989556	85
abcb6	ENSDART00000092324 abcb6 chr1:4998835-5022269 (+)	chr1:4998835-5022269	+	1	Annotated and revised	5	201	2447	chr1:5022068-5024515	Known 3'UTR	4	1	5022198	4	Novel 3'UTR (Extended)	772	4	5024321	50	5024463	87	5024474	8	5024515	627
si:ch211-44l19.2	ENSDART00000113853 si:ch211-44l19.2 chr1:52166979-52178893 (-), NM_021381 Prokr1 chr1:52167336-52178556 (-)	chr1:52166979-52178893	-	1	Annotated and revised	8	231	4582	chr1:52167074-52167210	Known 3'UTR	79	2	52166951	12	52167074	67	Novel 3'UTR (Extended)	132	5	52162742	4	52162754	24	52164269	55	52165247	6	52165260	43	Novel 3'UTR (Shortened)	6	1	52167184	6
pgam1b	ENSDART00000016350 pgam1b chr1:55247077-55258229 (-), ENSDART00000122601 pgam1b chr1:55247076-55258273 (-)	chr1:55247076-55258273	-	1	Annotated and revised	11	1678	974	chr1:55247072-55248754	Known 3'UTR	3581	2	55247072	3355	55247082	226	Novel 3'UTR (Shortened)	80	9	55247197	7	55247272	5	55247322	32	55247474	5	55247496	8	55247556	5	55247571	7	55247692	7	55247976	4
si:ch211-165a10.4	ENSDART00000131222 si:ch211-165a10.4 chr1:44498240-44499853 (-), ENSDART00000146032 si:ch211-165a10.4 chr1:44497788-44500184 (-)	chr1:44497788-44500184	-	1	None associated with 3' UTR	0	263	0
gart	ENSDART00000073560 gart chr1:989726-1015830 (-)	chr1:989726-1015830	-	0	Only extended	3	0	400	chr1:989326-989726	Novel 3'UTR (Extended)	8450	3	989310	101	989326	8344	989342	5
eng1b	ENSDART00000016642 eng1b chr1:6750435-6754481 (-)	chr1:6750435-6754481	-	2	Annotated and revised	2	476	596	chr1:6750433-6750911	Known 3'UTR	648	1	6750433	648	Novel 3'UTR (Extended)	87	1	6750315	87
zgc:65894	ENSDART00000019573 zgc:65894 chr1:56764158-56770684 (-)	chr1:56764158-56770684	-	2	Only annotated	1	156	151	chr1:56764163-56764314	Known 3'UTR	14101	1	56764163	14101
pdcd4a	ENSDART00000030141 pdcd4a chr1:24928735-24945386 (-), ENSDART00000147595 pdcd4a chr1:24928735-24945776 (-)	chr1:24928735-24945776	-	1	Annotated and revised	2	1207	1318	chr1:24928734-24929942	Known 3'UTR	6296	1	24928734	6296	Novel 3'UTR (Extended)	75	1	24928624	75
CEP44	ENSDART00000075086 CEP44 chr1:38771731-38784163 (+), ENSDART00000127635 CEP44 chr1:38771978-38781654 (+)	chr1:38771731-38784163	+	1	Annotated and revised	3	1422	1422		Known 3'UTR	226	1	38784163	226	Novel 3'UTR (Shortened)	83	2	38783209	75	38783219	8
rnf175	ENSDART00000125358 rnf175 chr1:9113527-9124598 (-), ENSDART00000054835 rnf175 chr1:9113527-9124598 (-)	chr1:9113527-9124598	-	1	Only annotated	1	476	473	chr1:9113530-9114003	Known 3'UTR	1125	1	9113530	1125
zgc:85910	ENSDART00000146258 zgc:85910 chr1:16422938-16435168 (-), ENSDART00000078874 zgc:85910 chr1:16422939-16431753 (-)	chr1:16422938-16435168	-	1	Annotated and revised	8	440	2459	chr1:16422933-16423378	Known 3'UTR	2199	1	16422933	2199	Novel 3'UTR (Extended)	51	4	16420919	4	16421107	28	16421441	8	16422193	11	Novel 3'UTR (Shortened)	179	3	16423189	102	16423257	28	16423373	49
POLD4	ENSDART00000139036 POLD4 chr1:45162531-45166415 (-), ENSDART00000112960 POLD4 chr1:45162533-45166458 (-)	chr1:45162531-45166458	-	1	Only annotated	1	123	121	chr1:45162533-45162654	Known 3'UTR	1749	1	45162533	1749
grhprb	ENSDART00000009457 grhprb chr1:18578765-18587294 (-), ENSDART00000132958 grhprb chr1:18578765-18587294 (-), ENSDART00000147502 grhprb chr1:18577697-18587434 (-), ENSDART00000139314 grhprb chr1:18580940-18587273 (-)	chr1:18577697-18587434	-	2	Annotated and revised	6	1190	2497		Known 3'UTR	1200	3	18578765	679	18578780	13	18578840	508	Novel 3'UTR (Extended)	25	3	18576390	5	18576468	12	18576759	8
CHST12 (4 of 7)	ENSDART00000140725 CHST12 (4 of 7) chr1:10776920-10777952 (-)	chr1:10776920-10777952	-	0	No 3P tags	-	0	0
si:ch211-113e8.6	ENSDART00000133738 si:ch211-113e8.6 chr1:40578924-40582411 (-), ENSDART00000020237 si:ch211-113e8.6 chr1:40575625-40581084 (-)	chr1:40575625-40582411	-	0	No 3P tags	-	0	0
CCDC86	ENSDART00000083836 CCDC86 chr1:52946672-52955985 (-)	chr1:52946672-52955985	-	1	Annotated and revised	2	220	451	chr1:52946674-52946892	Known 3'UTR	5010	1	52946674	5010	Novel 3'UTR (Extended)	7	1	52946441	7
BTBD18 (1 of 2)	ENSDART00000125123 BTBD18 (1 of 2) chr1:44826682-44829970 (+)	chr1:44826682-44829970	+	0	None associated with 3' UTR	0	0	0
TPP2	ENSDART00000112730 TPP2 chr1:293647-318435 (+), NM_001091911 tpp2 chr1:293662-316009 (+)	chr1:293647-318435	+	1	Annotated and revised	5	1595	3008	chr1:316840-318439	Known 3'UTR	101	2	318439	95	318458	6	Novel 3'UTR (Extended)	8	1	319017	8	Novel 3'UTR (Shortened)	35	2	317126	25	317966	10
tmed1b	ENSDART00000113387 tmed1b chr1:59667309-59677015 (-), ENSDART00000098308 tmed1b chr1:59667321-59677129 (-)	chr1:59667309-59677129	-	1	Annotated and revised	5	3629	271	chr1:59667308-59670938	Known 3'UTR	1456	2	59667308	1384	59667328	72	Novel 3'UTR (Shortened)	30	3	59670783	5	59670794	7	59670816	18
si:ch73-380n15.2	ENSDART00000127506 si:ch73-380n15.2 chr1:21057719-21144754 (-)	chr1:21057719-21144754	-	0	No 3P tags	-	0	0
si:dkey-151m22.8	ENSDART00000149380 si:dkey-151m22.8 chr1:34381375-34382850 (-)	chr1:34381375-34382850	-	1	None associated with 3' UTR	0	44	0
cnppd1	NM_001039307 CNPPD1 chr1:5025791-5031141 (+), ENSDART00000037036 cnppd1 chr1:5025589-5033477 (+)	chr1:5025589-5033477	+	1	Annotated and revised	3	962	960	chr1:5032515-5033475	Known 3'UTR	1572	1	5033475	1572	Novel 3'UTR (Shortened)	9	2	5033319	5	5033347	4
fgf20a	ENSDART00000013024 fgf20a chr1:15134971-15136368 (-)	chr1:15134971-15136368	-	2	Only extended	2	46	818	chr1:15134305-15135017	Novel 3'UTR (Extended)	137	2	15134199	6	15134305	131
AL954695.6	ENSDART00000145374 AL954695.6 chr1:25546252-25549136 (+)	chr1:25546252-25549136	+	0	Only extended	1	0	292	chr1:25549136-25549428	Novel 3'UTR (Extended)	6	1	25549428	6
CR788255.2	ENSDART00000123946 CR788255.2 chr1:56140387-56146376 (+)	chr1:56140387-56146376	+	0	No 3P tags	-	0	0
si:ch211-197n1.2;si:dkey-256e7.5	ENSDART00000114386 si:ch211-197n1.2 chr1:16360151-16416714 (-), ENSDART00000043484 si:ch211-197n1.2 chr1:16359909-16392118 (-), ENSDART00000131559 si:dkey-256e7.5 chr1:16394282-16405003 (-), ENSDART00000142689 si:dkey-256e7.5 chr1:16409827-16416932 (-)	chr1:16359909-16416932	-	1	Only annotated	2	242	243		Known 3'UTR	285	2	16359898	23	16359908	262
atp1a1a.3	ENSDART00000103850 atp1a1a.3 chr1:1562079-1572446 (+), NM_133517 Atp12a chr1:1563833-1569645 (+)	chr1:1562079-1572446	+	1	Only annotated	2	119	118	chr1:1572327-1572445	Known 3'UTR	363	2	1572427	5	1572445	358
CABZ01058865.1	ENSDART00000089946 CABZ01058865.1 chr1:58093920-58105044 (-)	chr1:58093920-58105044	-	0	None associated with 3' UTR	0	0	0
mad1l1	ENSDART00000048610 mad1l1 chr1:8816887-8932348 (-), ENSDART00000103478 mad1l1 chr1:8816884-8934573 (-), ENSDART00000103479 mad1l1 chr1:8816884-8934573 (-), ENSDART00000147904 mad1l1 chr1:8815453-8934592 (-)	chr1:8815453-8934592	-	2	Annotated and revised	9	1795	5484	chr1:8816884-8817248	Known 3'UTR	2585	4	8815465	5	8816812	19	8816854	7	8816884	2554	Novel 3'UTR (Extended)	22	2	8811764	5	8813697	17	Novel 3'UTR (Shortened)	174	3	8815961	162	8816705	4	8816992	8
HERC3	ENSDART00000112994 HERC3 chr1:51149530-51198265 (+), ENSDART00000141977 HERC3 chr1:51146498-51198621 (+)	chr1:51146498-51198621	+	1	Annotated and revised	5	356	2517	chr1:51198265-51198592	Known 3'UTR	163	2	51198592	157	51198654	6	Novel 3'UTR (Extended)	8	2	51200035	4	51200782	4	Novel 3'UTR (Shortened)	44	1	51198416	44
si:ch211-93g23.2	ENSDART00000147638 si:ch211-93g23.2 chr1:5503644-5509564 (+), ENSDART00000103696 si:ch211-93g23.2 chr1:5503612-5509565 (+)	chr1:5503612-5509565	+	1	Only annotated	1	98	92	chr1:5509467-5509559	Known 3'UTR	175	1	5509559	175
odz3	ENSDART00000005592 odz3 chr1:39960336-40139975 (+), ENSDART00000148701 odz3 chr1:39750403-40139247 (+), ENSDART00000122700 odz3 chr1:39845115-40140106 (+), ENSDART00000137676 odz3 chr1:39915567-40142441 (+), ENSDART00000084891 odz3 chr1:39750403-39854301 (+)	chr1:39750403-40142441	+	5	Annotated and revised	6	3197	3193		Known 3'UTR	1052	3	40140104	530	40142347	227	40142437	295	Novel 3'UTR (Shortened)	265	3	40140213	176	40141089	9	40141099	80
grin2bb	ENSDART00000092613 grin2bb chr1:45847162-45998380 (-), ENSDART00000143664 grin2bb chr1:45843254-46024295 (-)	chr1:45843254-46024295	-	1	Only Novel 3'UTR (Shortened)	3	3908	3631	chr1:45843531-45847162	Novel 3'UTR (Shortened)	148	3	45843531	133	45845647	5	45846483	10
C1H4orf34	ENSDART00000137567 C1H4orf34 chr1:22073029-22082319 (-), ENSDART00000008201 C1H4orf34 chr1:22071716-22082402 (-)	chr1:22071716-22082402	-	2	Annotated and revised	19	1425	1403	chr1:22072938-22073141	Known 3'UTR	214	7	22071699	10	22071738	13	22071761	4	22071776	5	22071800	5	22072938	171	22072958	6	Novel 3'UTR (Shortened)	74	12	22071819	4	22071836	8	22071918	5	22072000	11	22072015	6	22072041	5	22072075	3	22072098	9	22072146	4	22072195	7
dpcd	ENSDART00000085309 dpcd chr1:31108174-31111826 (-), ENSDART00000142296 dpcd chr1:31108235-31111616 (-)	chr1:31108174-31111826	-	2	Annotated and revised	4	224	644		Known 3'UTR	1666	1	31108175	1666	Novel 3'UTR (Extended)	52	3	31107815	26	31108037	4	31108066	22
si:ch211-202h22.9	ENSDART00000108755 si:ch211-202h22.9 chr1:55166167-55176585 (+), ENSDART00000136063 si:ch211-202h22.9 chr1:55165900-55176788 (+)	chr1:55165900-55176788	+	1	Only annotated	2	203	200	chr1:55176585-55176785	Known 3'UTR	455	2	55176785	355	55176803	100
mcf2l	ENSDART00000114083 mcf2l chr1:46991050-47091395 (+), ENSDART00000144821 mcf2l chr1:47076991-47087744 (+)	chr1:46991050-47091395	+	1	Only extended	2	389	1321		Novel 3'UTR (Extended)	3129	2	47091637	17	47092162	3112
si:dkey-27n6.11	ENSDART00000139818 si:dkey-27n6.11 chr1:37434885-37458734 (-), ENSDART00000144472 si:dkey-27n6.11 chr1:37433378-37482633 (-)	chr1:37433378-37482633	-	1	Only Novel 3'UTR (Shortened)	1	1501	924		Novel 3'UTR (Shortened)	6	1	37433955	6
zgc:171452	ENSDART00000097964 zgc:171452 chr1:57009533-57014641 (+)	chr1:57009533-57014641	+	1	No 3P tags	-	59	59
ncapg	ENSDART00000133659 ncapg chr1:22333571-22347324 (+), ENSDART00000142879 ncapg chr1:22337784-22346668 (+), ENSDART00000102609 ncapg chr1:22334561-22347322 (+)	chr1:22333571-22347324	+	1	Annotated and revised	5	405	403		Known 3'UTR	6530	3	22347278	27	22347286	25	22347322	6478	Novel 3'UTR (Shortened)	18	2	22347070	7	22347211	11
fam155a	ENSDART00000112106 fam155a chr1:28212405-28321676 (+), NM_001081283 Tmem28 chr1:28212992-28314343 (+)	chr1:28212405-28321676	+	1	Only extended	1	1168	4179	chr1:28320508-28324687	Novel 3'UTR (Extended)	29	1	28324687	29
CR626902.1	ENSDART00000046215 CR626902.1 chr1:57605185-57610074 (+)	chr1:57605185-57610074	+	0	None associated with 3' UTR	0	0	0
lrrc58a	ENSDART00000114746 lrrc58a chr1:47983210-47990068 (+)	chr1:47983210-47990068	+	0	Only extended	4	0	2996	chr1:47990068-47993064	Novel 3'UTR (Extended)	56	4	47991001	12	47992386	11	47992932	4	47993064	29
slkb	ENSDART00000134399 slkb chr1:50112916-50154867 (-), ENSDART00000017965 slkb chr1:50115502-50154867 (-)	chr1:50112916-50154867	-	1	Annotated and revised	3	2586	4022	chr1:50112917-50115502	Known 3'UTR	809	1	50112917	809	Novel 3'UTR (Extended)	26	1	50111480	26	Novel 3'UTR (Shortened)	6	1	50113210	6
nlgn4a	ENSDART00000113818 nlgn4a chr1:32080645-32244350 (+), ENSDART00000128317 nlgn4a chr1:32080645-32244350 (+)	chr1:32080645-32244350	+	0	Only extended	4	0	1645	chr1:32244350-32245995	Novel 3'UTR (Extended)	768	4	32244938	15	32245025	30	32245117	63	32245995	660
itsn1	ENSDART00000000087 itsn1 chr1:47492920-47569055 (-), ENSDART00000139573 itsn1 chr1:47516117-47569055 (-), ENSDART00000132378 itsn1 chr1:47496547-47569055 (-)	chr1:47492920-47569055	-	3	Annotated and revised	7	3931	3931		Known 3'UTR	857	5	47492920	767	47496520	8	47496578	4	47516059	25	47516116	53	Novel 3'UTR (Shortened)	46	2	47495851	6	47496027	40
CABZ01043829.1	ENSDART00000125575 CABZ01043829.1 chr1:55012684-55013167 (+)	chr1:55012684-55013167	+	0	No 3P tags	-	0	0
kctd12.2	ENSDART00000075584 kctd12.2 chr1:33928605-33930081 (+)	chr1:33928605-33930081	+	2	Annotated and revised	3	608	5016	chr1:33929473-33930081	Known 3'UTR	624	2	33930081	612	33930094	12	Novel 3'UTR (Extended)	7	1	33934489	7
camk2d2	ENSDART00000040049 camk2d2 chr1:13048223-13118821 (-), ENSDART00000044896 camk2d2 chr1:13048223-13118821 (-)	chr1:13048223-13118821	-	1	Only extended	2	500	1506	chr1:13047217-13048723	Novel 3'UTR (Extended)	1336	2	13047217	1329	13047630	7
vps8	ENSDART00000041419 vps8 chr1:29071031-29298137 (+), ENSDART00000143639 vps8 chr1:29071031-29298143 (+), ENSDART00000101779 vps8 chr1:29071031-29298143 (+), ENSDART00000146783 vps8 chr1:29090750-29144452 (+), ENSDART00000131092 vps8 chr1:29071501-29242864 (+)	chr1:29071031-29298143	+	2	Annotated and revised	3	122	4458		Known 3'UTR	352	2	29298122	4	29298137	348	Novel 3'UTR (Extended)	7	1	29302632	7
ptprdb	ENSDART00000127145 ptprdb chr1:17947091-17975785 (-), ENSDART00000089132 ptprdb chr1:17865504-17951715 (-), ENSDART00000131579 ptprdb chr1:17864814-17979507 (-), ENSDART00000143663 ptprdb chr1:17947454-17979471 (-)	chr1:17864814-17979507	-	3	Only extended	5	690	4884		Novel 3'UTR (Extended)	979	5	17860604	9	17860620	917	17864325	9	17864336	33	17864390	11
CD200 (4 of 5)	ENSDART00000074160 CD200 (4 of 5) chr1:34817259-34840332 (-)	chr1:34817259-34840332	-	0	None associated with 3' UTR	0	0	0
rcan1	ENSDART00000123271 rcan1 chr1:2692807-2706447 (+), ENSDART00000060324 rcan1 chr1:2694267-2703212 (+)	chr1:2692807-2706447	+	2	Annotated and revised	4	3764	3765		Known 3'UTR	2179	2	2703168	5	2706448	2174	Novel 3'UTR (Shortened)	13	2	2702898	8	2704511	5
fn1b	ENSDART00000103755 fn1b chr1:4393281-4432219 (-), ENSDART00000017312 fn1b chr1:4393282-4399026 (-), ENSDART00000023692 fn1b chr1:4393281-4432219 (-)	chr1:4393281-4432219	-	1	Only annotated	2	1173	1163		Known 3'UTR	979	2	4393282	380	4393292	599
chtf18	ENSDART00000109177 chtf18 chr1:8275127-8303232 (+), ENSDART00000092058 chtf18 chr1:8275114-8303288 (+)	chr1:8275114-8303288	+	2	Annotated and revised	6	1164	4862		Known 3'UTR	320	2	8303232	92	8303284	228	Novel 3'UTR (Extended)	40	4	8303543	5	8303689	4	8303739	27	8305282	4
tubgcp3	ENSDART00000042064 tubgcp3 chr1:46902579-46946309 (+), ENSDART00000143228 tubgcp3 chr1:46902400-46947377 (+)	chr1:46902400-46947377	+	1	Annotated and revised	6	1068	1058	chr1:46946309-46947367	Known 3'UTR	313	3	46947320	5	46947367	303	46947389	5	Novel 3'UTR (Shortened)	122	3	46946775	49	46946893	15	46947052	58
ern2	ENSDART00000143587 ern2 chr1:8245890-8271713 (-), ENSDART00000081355 ern2 chr1:8245896-8268155 (-)	chr1:8245890-8271713	-	0	Annotated and revised	8	0	5967		Known 3'UTR	7	1	8245807	7	Novel 3'UTR (Extended)	326	7	8239929	191	8239995	9	8240020	5	8240037	5	8240048	96	8240110	4	8243863	16
CABZ01059294.1	ENSDART00000143568 CABZ01059294.1 chr1:59432702-59433977 (-)	chr1:59432702-59433977	-	0	None associated with 3' UTR	0	0	0
lgi2b	ENSDART00000101623 lgi2b chr1:40416157-40421377 (+), ENSDART00000113109 lgi2b chr1:40416054-40422389 (+)	chr1:40416054-40422389	+	2	Annotated and revised	3	1033	1033	chr1:40421356-40422389	Known 3'UTR	323	2	40422389	305	40422400	18	Novel 3'UTR (Shortened)	4	1	40421986	4
si:ch73-343l4.1	ENSDART00000143931 si:ch73-343l4.1 chr1:56391535-56391818 (+)	chr1:56391535-56391818	+	0	No 3P tags	-	0	0
CABZ01084613.1	ENSDART00000112921 CABZ01084613.1 chr1:59533895-59539069 (+)	chr1:59533895-59539069	+	0	Only extended	2	0	2578	chr1:59539069-59541647	Novel 3'UTR (Extended)	14	2	59541647	9	59541663	5
CABZ01025474.1	ENSDART00000101749 CABZ01025474.1 chr1:34631127-34634673 (-), ENSDART00000101750 CABZ01025474.1 chr1:34633889-34634658 (-), ENSDART00000099354 CABZ01025474.1 chr1:34631127-34634685 (-)	chr1:34631127-34634685	-	0	No 3P tags	-	0	0
PARD3B (2 of 2)	ENSDART00000097632 PARD3B (2 of 2) chr1:4670971-4855754 (-)	chr1:4670971-4855754	-	1	Annotated and revised	4	3729	3724	chr1:4670976-4674700	Known 3'UTR	80	2	4670976	73	4670981	7	Novel 3'UTR (Shortened)	9	2	4672433	5	4673660	4
si:dkey-79f11.7	ENSDART00000141765 si:dkey-79f11.7 chr1:6938756-6946420 (+)	chr1:6938756-6946420	+	0	None associated with 3' UTR	0	0	0
NANS	ENSDART00000067086 NANS chr1:11631991-11640923 (+)	chr1:11631991-11640923	+	1	Only annotated	2	197	187	chr1:11640726-11640913	Known 3'UTR	13368	2	11640896	28	11640913	13340
SLC5A10	ENSDART00000112160 SLC5A10 chr1:7137598-7190147 (+), NM_001033227 Slc5a10 chr1:7137589-7184499 (+)	chr1:7137589-7190147	+	0	Only extended	4	0	2103	chr1:7190147-7192250	Novel 3'UTR (Extended)	67	4	7190539	11	7190554	7	7190762	7	7192250	42
tsc2	NM_000548 TSC2 chr1:54750065-54818990 (+), ENSDART00000122071 tsc2 chr1:54750008-54821473 (+)	chr1:54750008-54821473	+	0	Annotated and revised	6	0	4719	chr1:54821473-54822491	Known 3'UTR	5	1	54821521	5	Novel 3'UTR (Extended)	428	5	54821898	125	54822334	13	54822349	9	54822491	263	54823709	18
mxb	NM_204609 MX1 chr1:6475776-6477774 (+), ENSDART00000110696 mxb chr1:6475662-6484075 (+)	chr1:6475662-6484075	+	0	Only extended	1	0	220	chr1:6484075-6484295	Novel 3'UTR (Extended)	201	1	6484295	201
snapc3	ENSDART00000124781 snapc3 chr1:27049292-27149818 (-), ENSDART00000130180 snapc3 chr1:27127981-27149823 (-), ENSDART00000105184 snapc3 chr1:27049663-27071824 (-)	chr1:27049292-27149823	-	3	Only annotated	7	557	558		Known 3'UTR	349	7	27049291	153	27049324	14	27049636	15	27049684	71	27049743	5	27127967	26	27128015	65
STK16	ENSDART00000055047 STK16 chr1:4311592-4323415 (+), ENSDART00000142248 STK16 chr1:4311729-4315860 (+)	chr1:4311592-4323415	+	1	Annotated and revised	11	581	3636		Known 3'UTR	354	2	4323329	20	4323412	334	Novel 3'UTR (Extended)	1197	8	4323537	4	4323613	17	4323665	12	4323877	4	4325494	29	4325504	5	4326059	5	4326470	1121	Novel 3'UTR (Shortened)	6	1	4322942	6
wu:fj30f06	ENSDART00000127601 wu:fj30f06 chr1:642737-644549 (-)	chr1:642737-644549	-	0	Only extended	2	0	758	chr1:642033-642737	Novel 3'UTR (Extended)	1789	2	641979	5	642033	1784
si:ch73-343l4.3	ENSDART00000144358 si:ch73-343l4.3 chr1:56408792-56413397 (+)	chr1:56408792-56413397	+	0	Only extended	1	0	277	chr1:56413397-56413674	Novel 3'UTR (Extended)	8	1	56413674	8
f7i	ENSDART00000122230 f7i chr1:23265-58985 (+), ENSDART00000128600 f7i chr1:23255-58896 (+), ENSDART00000003463 f7i chr1:23259-30081 (+)	chr1:23255-58985	+	3	Only annotated	2	358	358		Known 3'UTR	1959	2	30083	979	58985	980
rpl9	ENSDART00000054340 rpl9 chr1:22043820-22048568 (-), ENSDART00000130277 rpl9 chr1:22043823-22048519 (-), ENSDART00000054338 rpl9 chr1:22043596-22048598 (-), ENSDART00000147800 rpl9 chr1:22043820-22048487 (-)	chr1:22043596-22048598	-	2	Only annotated	1	396	170		Known 3'UTR	52918	1	22043822	52918
creb1	ENSDART00000075632 creb1 chr1:33180212-33190596 (-)	chr1:33180212-33190596	-	2	Annotated and revised	11	877	1623	chr1:33179768-33181089	Known 3'UTR	56	3	33180114	9	33180199	4	33180216	43	Novel 3'UTR (Extended)	1979	6	33179466	161	33179684	9	33179768	1648	33179815	28	33179898	68	33179914	65	Novel 3'UTR (Shortened)	134	2	33180520	119	33180571	15
hdhd1	ENSDART00000137156 hdhd1 chr1:31882590-31926772 (+), ENSDART00000037293 hdhd1 chr1:31882840-31926768 (+), ENSDART00000135078 hdhd1 chr1:31882840-31884058 (+)	chr1:31882590-31926772	+	2	Annotated and revised	5	438	2668		Known 3'UTR	111	2	31884017	22	31926768	89	Novel 3'UTR (Extended)	80	3	31926944	36	31927321	10	31929002	34
hmx4	NM_001104865 LOC100049513 chr1:41291419-41291731 (-), ENSDART00000027463 hmx4 chr1:41290721-41292304 (-)	chr1:41290721-41292304	-	1	Annotated and revised	3	626	688	chr1:41290724-41291347	Known 3'UTR	114	2	41290659	44	41290724	70	Novel 3'UTR (Shortened)	14	1	41290889	14
si:ch211-205a14.7	ENSDART00000135833 si:ch211-205a14.7 chr1:37902407-37917655 (+), ENSDART00000143053 si:ch211-205a14.7 chr1:37897921-37917626 (+)	chr1:37897921-37917655	+	0	None associated with 3' UTR	0	0	0
chrnb2a	ENSDART00000002532 chrnb2a chr1:21321055-21367770 (-), ENSDART00000142524 chrnb2a chr1:21321052-21341234 (-)	chr1:21321052-21367770	-	0	Only extended	1	0	448		Novel 3'UTR (Extended)	4	1	21320607	4
FAM161A	ENSDART00000127216 FAM161A chr1:54247908-54255339 (-)	chr1:54247908-54255339	-	0	Only extended	4	0	2509	chr1:54246082-54247908	Novel 3'UTR (Extended)	51	4	54245399	8	54245540	13	54246063	12	54246082	18
MFAP4 (10 of 12)	ENSDART00000100197 MFAP4 (10 of 12) chr1:59843330-59844660 (+)	chr1:59843330-59844660	+	1	Only annotated	1	143	142	chr1:59844517-59844659	Known 3'UTR	206	1	59844659	206
map2k7	ENSDART00000148086 map2k7 chr1:46310619-46326871 (+), ENSDART00000048191 map2k7 chr1:46310640-46326871 (+)	chr1:46310619-46326871	+	0	Only extended	8	0	7599	chr1:46326871-46333057	Novel 3'UTR (Extended)	152	8	46327300	4	46327773	15	46327780	3	46328357	5	46331585	4	46332429	20	46333057	97	46334470	4
fip1l1	ENSDART00000103346 fip1l1 chr1:13267563-13288426 (+)	chr1:13267563-13288428	+	1	Annotated and revised	3	169	444	chr1:13288259-13288432	Known 3'UTR	404	2	13288409	38	13288432	366	Novel 3'UTR (Extended)	12	1	13288703	12
si:dkey-22n8.2	ENSDART00000053099 si:dkey-22n8.2 chr1:47443006-47454392 (+), ENSDART00000132843 si:dkey-22n8.2 chr1:47445116-47454458 (+)	chr1:47443006-47454458	+	0	Only extended	1	0	369		Novel 3'UTR (Extended)	61	1	47455932	61
fat1	ENSDART00000145068 fat1 chr1:16118816-16266817 (+), ENSDART00000010526 fat1 chr1:16118816-16264608 (+), ENSDART00000103262 fat1 chr1:16118816-16264608 (+)	chr1:16118816-16266817	+	2	Annotated and revised	4	2414	2419	chr1:16264403-16266822	Known 3'UTR	1258	3	16266781	103	16266807	14	16266822	1141	Novel 3'UTR (Shortened)	6	1	16266545	6
cldng	ENSDART00000142111 cldng chr1:33278168-33279819 (-), ENSDART00000015547 cldng chr1:33277724-33279850 (-)	chr1:33277724-33279850	-	1	Annotated and revised	4	293	297		Known 3'UTR	174	1	33277720	174	Novel 3'UTR (Shortened)	25527	3	33277856	9	33277888	25465	33277904	53
CPZ	ENSDART00000109165 CPZ chr1:41182654-41201686 (+), ENSDART00000147497 CPZ chr1:41182667-41199872 (+)	chr1:41182654-41201686	+	2	Only annotated	1	2582	2586	chr1:41199104-41201690	Known 3'UTR	200	1	41201690	200
WDR19	ENSDART00000131257 WDR19 chr1:20278501-20321325 (-), ENSDART00000034477 WDR19 chr1:20282851-20321276 (-), ENSDART00000135905 WDR19 chr1:20298689-20312293 (-)	chr1:20278501-20321325	-	1	Annotated and revised	5	265	828		Known 3'UTR	357	2	20278504	353	20278514	4	Novel 3'UTR (Extended)	77	3	20277938	22	20278186	16	20278378	39
cnnm2b	ENSDART00000112333 cnnm2b chr1:31178765-31253331 (+), NM_001102471 Cnnm2 chr1:31179391-31251484 (+)	chr1:31178765-31253331	+	1	Annotated and revised	3	1781	1779	chr1:31251550-31253329	Known 3'UTR	110	1	31253329	110	Novel 3'UTR (Shortened)	9	2	31252829	4	31252974	5
NDUFB7	ENSDART00000142069 NDUFB7 chr1:56319930-56325525 (-), ENSDART00000043933 NDUFB7 chr1:56320019-56325525 (-)	chr1:56319930-56325525	-	2	Only annotated	1	171	81	chr1:56320020-56320101	Known 3'UTR	4749	1	56320020	4749
pcca	ENSDART00000034097 pcca chr1:28807324-28898982 (+), ENSDART00000135252 pcca chr1:28807372-28821884 (+), ENSDART00000133905 pcca chr1:28807313-28898986 (+), ENSDART00000136786 pcca chr1:28807321-28821264 (+)	chr1:28807313-28898986	+	1	Annotated and revised	8	845	2291		Known 3'UTR	200	1	28898982	200	Novel 3'UTR (Extended)	18	2	28822430	4	28823555	14	Novel 3'UTR (Shortened)	409	5	28898227	4	28898321	7	28898454	7	28898707	379	28898719	12
TRIP10 (2 of 2)	ENSDART00000055107 TRIP10 (2 of 2) chr1:59764488-59776970 (+)	chr1:59764488-59776970	+	0	None associated with 3' UTR	0	0	0
SOCS1 (2 of 2)	ENSDART00000136198 SOCS1 (2 of 2) chr1:8038707-8042130 (-), ENSDART00000123246 SOCS1 (2 of 2) chr1:8038972-8039554 (-)	chr1:8038707-8042130	-	1	Only extended	2	265	1874	chr1:8037098-8038972	Novel 3'UTR (Extended)	120	2	8037088	20	8037098	100
BX908759.7	ENSDART00000146799 BX908759.7 chr1:57782268-57809115 (-)	chr1:57782268-57809115	-	0	None associated with 3' UTR	0	0	0
CABZ01084616.1	ENSDART00000105993 CABZ01084616.1 chr1:59563309-59565679 (+)	chr1:59563309-59565679	+	1	Only annotated	2	1207	1211	chr1:59564472-59565683	Known 3'UTR	24	2	59565597	5	59565683	19
RNF38	ENSDART00000139241 RNF38 chr1:17604954-17675566 (+), ENSDART00000089233 RNF38 chr1:17609400-17678864 (+)	chr1:17604954-17678864	+	2	Annotated and revised	11	3836	4704	chr1:17674967-17678937	Known 3'UTR	855	2	17678864	303	17678937	552	Novel 3'UTR (Extended)	80	2	17679093	61	17679732	19	Novel 3'UTR (Shortened)	79	7	17675144	14	17675195	5	17675278	4	17675331	19	17675361	18	17676404	8	17676521	11
pax5	ENSDART00000076986 pax5 chr1:20561271-20650521 (+), ENSDART00000132602 pax5 chr1:20560787-20650521 (+), ENSDART00000054395 pax5 chr1:20566348-20650521 (+)	chr1:20560787-20650521	+	0	Only extended	1	0	316	chr1:20650521-20650837	Novel 3'UTR (Extended)	71	1	20650837	71
cx44.1	ENSDART00000126904 cx44.1 chr1:47943138-47944832 (+), ENSDART00000007262 cx44.1 chr1:47943138-47945957 (+)	chr1:47943138-47945957	+	1	Only extended	1	1125	2160	chr1:47944832-47946992	Novel 3'UTR (Extended)	214	1	47946992	214
BX927114.3	ENSDART00000127091 BX927114.3 chr1:58460907-58461987 (+)	chr1:58460907-58461987	+	0	None associated with 3' UTR	0	0	0
BX571828.1	ENSDART00000113431 BX571828.1 chr1:27421889-27424153 (-)	chr1:27421889-27424153	-	0	None associated with 3' UTR	0	0	0
MUC17 (3 of 6);MUC17 (4 of 6)	ENSDART00000144997 MUC17 (4 of 6) chr1:45594382-45602312 (-), ENSDART00000131882 MUC17 (3 of 6) chr1:45605321-45612721 (-), ENSDART00000101355 MUC17 (3 of 6) chr1:45594646-45608530 (-)	chr1:45594382-45612721	-	2	Only extended	2	378	917		Novel 3'UTR (Extended)	42	2	45593682	17	45593729	25
si:dkey-245p14.6	NM_172381 AI314180 chr1:18308304-18340331 (-), ENSDART00000088949 si:dkey-245p14.6 chr1:18304646-18341137 (-)	chr1:18304646-18341137	-	1	Annotated and revised	9	755	754	chr1:18304647-18305401	Known 3'UTR	480	4	18304647	465	18304668	7	18304719	4	18304737	4	Novel 3'UTR (Shortened)	37	5	18304788	7	18305055	4	18305066	7	18305091	12	18305108	7
C1H16orf72 (1 of 2)	ENSDART00000025604 C1H16orf72 (1 of 2) chr1:7770279-7778767 (+)	chr1:7770279-7778767	+	1	Annotated and revised	6	952	1048	chr1:7777815-7778763	Known 3'UTR	2554	3	7778745	21	7778763	2466	7778863	67	Novel 3'UTR (Shortened)	13	2	7778210	4	7778506	9	Novel 3'UTR (Alternative last exon)	63	1	7775111	63
kdm2aa	ENSDART00000106684 kdm2aa chr1:45302406-45324816 (+), ENSDART00000135067 kdm2aa chr1:45307974-45325450 (+), ENSDART00000083103 kdm2aa chr1:45307974-45325447 (+), ENSDART00000147357 kdm2aa chr1:45294191-45325450 (+), ENSDART00000083127 kdm2aa chr1:45294183-45325450 (+)	chr1:45294183-45325450	+	1	Only annotated	2	916	913		Known 3'UTR	123	2	45325427	16	45325447	107
si:dkey-9i23.11	ENSDART00000140402 si:dkey-9i23.11 chr1:45374698-45381491 (+), ENSDART00000142820 si:dkey-9i23.11 chr1:45361994-45379732 (+)	chr1:45361994-45381491	+	2	Annotated and revised	3	2148	2112	chr1:45377584-45379696	Known 3'UTR	313	1	45379696	313	Novel 3'UTR (Shortened)	17	2	45377940	6	45377950	11
si:ch211-205a14.1	ENSDART00000146182 si:ch211-205a14.1 chr1:37821148-37838127 (+), ENSDART00000146047 si:ch211-205a14.1 chr1:37828331-37837963 (+)	chr1:37821148-37838127	+	1	None associated with 3' UTR	0	164	0
zgc:152698	ENSDART00000046507 zgc:152698 chr1:8221041-8221978 (+), NM_001088853 LOC398404 chr1:8221163-8221472 (+)	chr1:8221041-8221978	+	1	Only annotated	1	206	206	chr1:8221772-8221978	Known 3'UTR	102	1	8221978	102
SCLT1	ENSDART00000144596 SCLT1 chr1:11684333-11693389 (-), ENSDART00000134708 SCLT1 chr1:11680406-11690232 (-), ENSDART00000146067 SCLT1 chr1:11660586-11690179 (-), ENSDART00000079782 SCLT1 chr1:11660919-11689183 (-)	chr1:11660586-11693389	-	1	Annotated and revised	2	333	333		Known 3'UTR	1142	1	11660586	1142	Novel 3'UTR (Shortened)	23	1	11660785	23
chrna9	ENSDART00000077335 chrna9 chr1:22182711-22191655 (+), ENSDART00000140706 chrna9 chr1:22182715-22192005 (+)	chr1:22182711-22192005	+	1	Only Novel 3'UTR (Shortened)	1	350	135	chr1:22191655-22191790	Novel 3'UTR (Shortened)	56	1	22191790	56
ednrb1	NM_001079208 ednrb2 chr1:27559071-27561874 (-), ENSDART00000121758 ednrb1 chr1:27549860-27562105 (-)	chr1:27549860-27562105	-	1	Annotated and revised	3	5675	5677	chr1:27549858-27555535	Known 3'UTR	106	1	27549858	106	Novel 3'UTR (Shortened)	14	2	27550332	8	27555039	6
BX284640.2	ENSDART00000129019 BX284640.2 chr1:55879043-55879346 (+)	chr1:55879043-55879346	+	0	None associated with 3' UTR	0	0	0
ldb2b	NM_057734 Chi chr1:21582919-21604921 (-), ENSDART00000043556 ldb2b chr1:21579491-21608918 (-)	chr1:21579491-21608918	-	1	Only extended	1	3287	3752	chr1:21579167-21582778	Novel 3'UTR (Extended)	1966	1	21579167	1966
EIF3B (2 of 2)	ENSDART00000134531 EIF3B (2 of 2) chr1:10872844-10888788 (+), ENSDART00000111041 EIF3B (2 of 2) chr1:10871413-10881803 (+)	chr1:10871413-10888788	+	0	Only extended	1	0	2535		Novel 3'UTR (Extended)	201	1	10891323	201
tmco3	ENSDART00000109529 tmco3 chr1:93295-99795 (+)	chr1:93293-99795	+	0	Only extended	4	0	895	chr1:99795-100690	Novel 3'UTR (Extended)	1333	4	100236	8	100248	93	100490	5	100690	1227
LONRF2	ENSDART00000148175 LONRF2 chr1:27451829-27488177 (-), ENSDART00000129204 LONRF2 chr1:27450151-27533549 (-)	chr1:27450151-27533549	-	2	Annotated and revised	5	2118	2246	chr1:27450150-27452269	Known 3'UTR	340	1	27450150	340	Novel 3'UTR (Extended)	25	1	27450023	25	Novel 3'UTR (Shortened)	146	3	27450291	113	27450528	28	27450607	5
CABZ01052573.1	ENSDART00000101226 CABZ01052573.1 chr1:60193002-60194320 (+)	chr1:60193002-60194320	+	0	No 3P tags	-	0	0
CABZ01059406.1	ENSDART00000126054 CABZ01059406.1 chr1:57074107-57083388 (-)	chr1:57074107-57083388	-	0	Only extended	1	0	169	chr1:57073938-57074107	Novel 3'UTR (Extended)	11	1	57073938	11
tmem41ab	NM_001075200 TMEM41A chr1:29416940-29424421 (+), ENSDART00000033024 tmem41ab chr1:29409596-29425490 (+)	chr1:29409596-29425490	+	1	Only annotated	1	982	981	chr1:29424508-29425489	Known 3'UTR	170	1	29425489	170
si:ch211-14k19.6;si:ch211-14k19.7;si:ch211-14k19.8	ENSDART00000146642 si:ch211-14k19.8 chr1:8176530-8180715 (-), ENSDART00000132910 si:ch211-14k19.6 chr1:8189713-8191118 (-), ENSDART00000125596 si:ch211-14k19.7 chr1:8176616-8190903 (-), ENSDART00000147833 si:ch211-14k19.7 chr1:8181122-8185783 (-)	chr1:8176530-8191118	-	1	Annotated and revised	3	86	1655		Known 3'UTR	121	1	8176533	121	Novel 3'UTR (Extended)	76	2	8174961	63	8174997	13
znf827	ENSDART00000037516 znf827 chr1:35725789-35859492 (-), NM_178267 Zfp827 chr1:35729393-35859322 (-)	chr1:35725789-35859492	-	2	Only Novel 3'UTR (Shortened)	1	4477	4284	chr1:35725982-35730612	Novel 3'UTR (Shortened)	659	1	35725982	659
DNAJB14	ENSDART00000102337 DNAJB14 chr1:26837430-26863161 (+), NM_001031723 DNAJB14 chr1:26837456-26862121 (+)	chr1:26837430-26863161	+	1	Annotated and revised	3	807	880	chr1:26862354-26863161	Known 3'UTR	480	2	26863161	473	26863234	7	Novel 3'UTR (Shortened)	7	1	26862731	7
sid4	ENSDART00000100152 sid4 chr1:59519115-59528888 (-)	chr1:59519115-59528888	-	1	Only annotated	2	226	231	chr1:59519110-59519341	Known 3'UTR	864	2	59519091	415	59519110	449
GPRIN3 (1 of 2)	ENSDART00000132779 GPRIN3 (1 of 2) chr1:51359130-51368375 (-), ENSDART00000112258 GPRIN3 (1 of 2) chr1:51357956-51359717 (-), ENSDART00000137648 GPRIN3 (1 of 2) chr1:51357104-51368376 (-)	chr1:51357104-51368376	-	1	Annotated and revised	2	852	2271		Known 3'UTR	51	1	51357103	51	Novel 3'UTR (Extended)	11	1	51356859	11
CLIC6	NM_001009651 Clic2 chr1:1320862-1329376 (-), ENSDART00000097629 CLIC6 chr1:1319017-1331666 (-)	chr1:1319017-1331666	-	0	Only extended	4	0	2172	chr1:1317525-1319017	Novel 3'UTR (Extended)	579	4	1316810	6	1316845	16	1317525	538	1317536	19
si:ch211-76m11.7	ENSDART00000146520 si:ch211-76m11.7 chr1:37700407-37711117 (-)	chr1:37700407-37711117	-	0	Only extended	2	0	473	chr1:37699934-37700407	Novel 3'UTR (Extended)	261	2	37699934	241	37700136	20
scpp1	ENSDART00000127579 scpp1 chr1:37231109-37233939 (-)	chr1:37231109-37233939	-	1	Only extended	1	96	1440	chr1:37229765-37231205	Novel 3'UTR (Extended)	19	1	37229765	19
nfix	ENSDART00000135861 nfix chr1:52397835-52455018 (+), ENSDART00000121795 nfix chr1:52397903-52595159 (+)	chr1:52397835-52595159	+	1	Only extended	4	4131	9642		Novel 3'UTR (Extended)	1476	4	52456284	10	52598241	5	52600670	1357	52600688	104
PDXK (1 of 3)	ENSDART00000053102 PDXK (1 of 3) chr1:47385502-47421793 (-), ENSDART00000142560 PDXK (1 of 3) chr1:47385139-47421908 (-)	chr1:47385139-47421908	-	1	Only extended	5	363	5891	chr1:47381623-47385502	Novel 3'UTR (Extended)	235	5	47379611	13	47380640	8	47381332	4	47381623	206	47381759	4
pgm2	NM_001106007 Pgm2 chr1:17526385-17541449 (-), ENSDART00000020970 pgm2 chr1:17521062-17545814 (-)	chr1:17521062-17545814	-	1	Annotated and revised	3	1474	3245	chr1:17521061-17522536	Known 3'UTR	850	2	17521044	135	17521061	715	Novel 3'UTR (Extended)	12	1	17519396	12
si:dkey-222h21.14	ENSDART00000073779 si:dkey-222h21.14 chr1:59019260-59033187 (+), ENSDART00000145234 si:dkey-222h21.14 chr1:59018369-59033241 (+)	chr1:59018369-59033241	+	2	Only annotated	1	1415	1283	chr1:59031826-59033187	Known 3'UTR	13	1	59033187	13
tbc1d9	ENSDART00000083799 tbc1d9 chr1:53842370-53855639 (+), ENSDART00000143909 tbc1d9 chr1:53830083-53856474 (+), NM_001114237 tbc1d8b chr1:53817607-53837328 (+)	chr1:53817607-53856474	+	0	Only extended	7	0	5162		Novel 3'UTR (Extended)	240	7	53857215	4	53857902	9	53860359	21	53860909	7	53860934	139	53860944	8	53860955	52
rnf24	NM_001108591 Rnf24 chr1:42154243-42156965 (-), ENSDART00000053681 rnf24 chr1:42153361-42200304 (-), ENSDART00000144098 rnf24 chr1:42165884-42200262 (-)	chr1:42153361-42200304	-	1	Only revised	3	813	4121		Novel 3'UTR (Extended)	2440	2	42150122	2423	42150537	17	Novel 3'UTR (Shortened)	21	1	42153618	21
UBA6	ENSDART00000111454 UBA6 chr1:18591062-18628284 (+)	chr1:18591062-18628284	+	1	Only revised	2	257	1988	chr1:18628027-18630015	Novel 3'UTR (Extended)	760	1	18630015	760	Novel 3'UTR (Shortened)	6	1	18628105	6
lcorl	ENSDART00000134860 lcorl chr1:22348925-22369873 (-), ENSDART00000102600 lcorl chr1:22360654-22363090 (-), ENSDART00000138852 lcorl chr1:22347317-22370015 (-)	chr1:22347317-22370015	-	2	Annotated and revised	15	1769	4560		Known 3'UTR	557	2	22347319	550	22348909	7	Novel 3'UTR (Extended)	427	10	22356094	4	22356627	285	22356709	8	22357029	12	22357046	30	22357227	9	22357242	46	22358277	16	22358593	8	22359757	9	Novel 3'UTR (Shortened)	159	3	22348337	101	22348349	4	22348634	54
myo15ab	ENSDART00000143547 myo15ab chr1:7518154-7583314 (+), ENSDART00000113333 myo15ab chr1:7561329-7581347 (+)	chr1:7518154-7583314	+	0	None associated with 3' UTR	0	0	0
si:dkey-79f11.8	ENSDART00000138187 si:dkey-79f11.8 chr1:6963509-6967670 (+), ENSDART00000145441 si:dkey-79f11.8 chr1:6966852-6967399 (+)	chr1:6963509-6967670	+	1	None associated with 3' UTR	0	247	0
CD200 (1 of 5)	ENSDART00000103548 CD200 (1 of 5) chr1:9818785-9823408 (-)	chr1:9818785-9823408	-	0	Only extended	1	0	181	chr1:9818604-9818785	Novel 3'UTR (Extended)	68	1	9818604	68
tlr3	ENSDART00000013021 tlr3 chr1:16634838-16640122 (+), ENSDART00000128529 tlr3 chr1:16635070-16639915 (+)	chr1:16634838-16640122	+	1	Only extended	2	207	1186	chr1:16639915-16640756	Novel 3'UTR (Extended)	39	2	16640756	33	16641101	6
si:ch211-71k14.1	ENSDART00000150124 si:ch211-71k14.1 chr1:42663827-42672224 (-), ENSDART00000125882 si:ch211-71k14.1 chr1:42664335-42672235 (-)	chr1:42663827-42672235	-	1	No 3P tags	-	508	508
dachc	NM_001078708 dach1 chr1:29650398-29744844 (-), ENSDART00000018827 dachc chr1:29641396-29745261 (-)	chr1:29641396-29745261	-	1	Annotated and revised	4	670	811	chr1:29641255-29642066	Known 3'UTR	118	1	29641395	118	Novel 3'UTR (Extended)	123	2	29641230	10	29641255	113	Novel 3'UTR (Shortened)	5	1	29641538	5
RGAG1	ENSDART00000142702 RGAG1 chr1:45576870-45591356 (+), ENSDART00000101347 RGAG1 chr1:45576553-45591090 (+)	chr1:45576553-45591356	+	1	Only revised	2	266	1204	chr1:45591090-45592294	Novel 3'UTR (Extended)	784	1	45592294	784	Novel 3'UTR (Shortened)	23	1	45591225	23
PGBD4 (7 of 7)	ENSDART00000057044 PGBD4 (7 of 7) chr1:13384327-13417763 (-)	chr1:13384327-13417763	-	0	Only extended	9	0	1465	chr1:13383777-13384327	Novel 3'UTR (Extended)	364	9	13382862	4	13383343	13	13383563	10	13383655	56	13383748	70	13383777	194	13383787	5	13384053	7	13384086	5
taf5l	ENSDART00000125063 taf5l chr1:54475846-54484479 (-), ENSDART00000032552 taf5l chr1:54478591-54485532 (-)	chr1:54475846-54485532	-	2	Annotated and revised	4	2839	2846	chr1:54475839-54478685	Known 3'UTR	285	2	54475839	221	54478591	64	Novel 3'UTR (Shortened)	46	2	54476175	38	54476602	8
CASKIN1 (3 of 3)	ENSDART00000145308 CASKIN1 (3 of 3) chr1:6883799-6885424 (+)	chr1:6883799-6885424	+	0	No 3P tags	-	0	0
tmem8a	ENSDART00000138726 tmem8a chr1:8995992-9016578 (-), ENSDART00000041849 tmem8a chr1:8992461-9017000 (-)	chr1:8992461-9017000	-	2	Only annotated	1	3702	3702	chr1:8992461-8996163	Known 3'UTR	586	1	8992461	586
rad23a	ENSDART00000041265 rad23a chr1:52605850-52623351 (-), ENSDART00000149939 rad23a chr1:52606198-52623351 (-)	chr1:52605850-52623351	-	2	Annotated and revised	5	393	2467	chr1:52604666-52606344	Known 3'UTR	166	3	52605829	4	52605850	146	52606209	16	Novel 3'UTR (Extended)	198	2	52603877	8	52604666	190
atp1b1b	ENSDART00000139387 atp1b1b chr1:9896396-9915324 (+), ENSDART00000114114 atp1b1b chr1:9896313-9915262 (+)	chr1:9896313-9915324	+	2	Only revised	4	1327	2272	chr1:9913997-9916269	Novel 3'UTR (Extended)	1435	2	9916233	17	9916269	1418	Novel 3'UTR (Shortened)	57	2	9914084	14	9914215	43
tbck	ENSDART00000125099 tbck chr1:50773490-50801031 (-), ENSDART00000043309 tbck chr1:50705691-50798349 (-), ENSDART00000053028 tbck chr1:50777700-50801029 (-)	chr1:50705691-50801031	-	2	Annotated and revised	2	191	231		Known 3'UTR	803	1	50705690	803	Novel 3'UTR (Extended)	4	1	50773259	4
chrna6	ENSDART00000031546 chrna6 chr1:21258658-21286157 (-)	chr1:21258658-21286157	-	1	Only extended	1	240	2518	chr1:21256380-21258898	Novel 3'UTR (Extended)	149	1	21256380	149
zgc:136614	ENSDART00000039459 zgc:136614 chr1:47640916-47648885 (-), ENSDART00000063529 zgc:136614 chr1:47637894-47648897 (-)	chr1:47637894-47648897	-	1	Only annotated	2	1040	1102		Known 3'UTR	62	2	47637832	5	47637891	57
C3 (1 of 9)	ENSDART00000133079 C3 (1 of 9) chr1:56658815-56669256 (-), ENSDART00000058210 C3 (1 of 9) chr1:56664006-56666154 (-)	chr1:56658815-56669256	-	0	No 3P tags	-	0	0
CABZ01058868.1	ENSDART00000026776 CABZ01058868.1 chr1:58055209-58056356 (+)	chr1:58055209-58056356	+	0	None associated with 3' UTR	0	0	0
gtf2e2	ENSDART00000016488 gtf2e2 chr1:21625839-21646368 (+)	chr1:21625839-21646368	+	1	Only annotated	1	269	266	chr1:21646099-21646365	Known 3'UTR	7639	1	21646365	7639
bnc2	ENSDART00000102322 bnc2 chr1:25990136-26175158 (+), ENSDART00000128671 bnc2 chr1:26078547-26175158 (+), ENSDART00000129074 bnc2 chr1:26125729-26174491 (+), ENSDART00000125744 bnc2 chr1:26078543-26175139 (+)	chr1:25990136-26175158	+	1	Only extended	2	1476	5333		Novel 3'UTR (Extended)	929	2	26175362	14	26177825	915
hand2	ENSDART00000020409 hand2 chr1:38602512-38604378 (-)	chr1:38602512-38604378	-	1	Only annotated	1	533	527	chr1:38602518-38603045	Known 3'UTR	1138	1	38602518	1138
CABZ01070637.1	ENSDART00000100559 CABZ01070637.1 chr1:56961726-56966120 (-)	chr1:56961726-56966120	-	0	No 3P tags	-	0	0
si:ch211-76m11.5	ENSDART00000139992 si:ch211-76m11.5 chr1:37643375-37652927 (+), ENSDART00000146198 si:ch211-76m11.5 chr1:37641982-37651895 (+)	chr1:37641982-37652927	+	1	No 3P tags	-	78	78
si:dkeyp-13d11.1	ENSDART00000144669 si:dkeyp-13d11.1 chr1:38106738-38110487 (-), ENSDART00000140181 si:dkeyp-13d11.1 chr1:38106746-38110494 (-), ENSDART00000110685 si:dkeyp-13d11.1 chr1:38106628-38109177 (-)	chr1:38106628-38110494	-	1	None associated with 3' UTR	0	180	0
si:ch73-341p18.7	ENSDART00000148075 si:ch73-341p18.7 chr1:56276140-56283439 (+), ENSDART00000110119 si:ch73-341p18.7 chr1:56276175-56278491 (+)	chr1:56276140-56283439	+	0	None associated with 3' UTR	0	0	0
mtp	ENSDART00000079930 mtp chr1:11180887-11184203 (+)	chr1:11180887-11184203	+	1	Annotated and revised	8	2093	2505	chr1:11182110-11184198	Known 3'UTR	2922	2	11184105	185	11184198	2737	Novel 3'UTR (Extended)	369	2	11184605	124	11184615	245	Novel 3'UTR (Shortened)	154	4	11182713	90	11183914	28	11183939	10	11184036	26
tlr2	ENSDART00000055006 tlr2 chr1:8062221-8064588 (+), ENSDART00000122568 tlr2 chr1:8060151-8064588 (+)	chr1:8060151-8064588	+	0	Only extended	2	0	2035	chr1:8064588-8066623	Novel 3'UTR (Extended)	34	2	8064982	12	8066623	22
zgc:153650	ENSDART00000011560 zgc:153650 chr1:58029342-58041628 (+), NM_001034270 TSPAN1 chr1:58036228-58039275 (+)	chr1:58029342-58041628	+	1	Annotated and revised	2	399	399	chr1:58041229-58041628	Known 3'UTR	662	1	58041628	662	Novel 3'UTR (Shortened)	7	1	58041324	7
pibf1;tpt1	ENSDART00000122137 tpt1 chr1:34248736-34346307 (-), ENSDART00000141569 tpt1 chr1:34340907-34346391 (-), ENSDART00000102111 tpt1 chr1:34340612-34346481 (-), ENSDART00000125944 pibf1 chr1:34248734-34318010 (-), ENSDART00000008277 pibf1 chr1:34248736-34318010 (-)	chr1:34248734-34346481	-	3	Only annotated	2	623	623		Known 3'UTR	302360	2	34248736	1428	34340609	300932
golga7ba	ENSDART00000089603 golga7ba chr1:55450913-55471323 (+), ENSDART00000145652 golga7ba chr1:55448304-55471070 (+)	chr1:55448304-55471323	+	2	Annotated and revised	5	2844	2841	chr1:55468479-55471320	Known 3'UTR	578	3	55471069	111	55471320	449	55471336	18	Novel 3'UTR (Shortened)	10	2	55468771	5	55468962	5
MARCH4 (1 of 2)	ENSDART00000086935 MARCH4 (1 of 2) chr1:28899929-28984571 (-), ENSDART00000143800 MARCH4 (1 of 2) chr1:28936011-28984572 (-)	chr1:28899929-28984572	-	1	Annotated and revised	6	106	1927		Known 3'UTR	3819	4	28899931	2677	28899942	84	28899956	1031	28935970	27	Novel 3'UTR (Extended)	8	2	28898108	4	28899165	4
mab21l2	ENSDART00000014608 mab21l2 chr1:22850480-22852291 (+)	chr1:22850480-22852291	+	2	Annotated and revised	4	393	1032	chr1:22851898-22852291	Known 3'UTR	1102	3	22852209	9	22852291	1086	22852323	7	Novel 3'UTR (Extended)	18	1	22852930	18
SMU1	ENSDART00000073694 SMU1 chr1:45471470-45497637 (-)	chr1:45471470-45497637	-	2	Annotated and revised	3	888	888	chr1:45471470-45472358	Known 3'UTR	287	1	45471470	287	Novel 3'UTR (Shortened)	13	2	45471695	7	45472022	6
A2LD1 (3 of 3)	ENSDART00000103795 A2LD1 (3 of 3) chr1:2210926-2214312 (-), NM_001162290 LOC100167721 chr1:2212265-2212526 (-)	chr1:2210926-2214312	-	1	Only annotated	1	1180	1174	chr1:2210932-2212106	Known 3'UTR	101	1	2210932	101
CABZ01059415.1	ENSDART00000130990 CABZ01059415.1 chr1:57172756-57190333 (-)	chr1:57172756-57190333	-	0	Only extended	1	0	843	chr1:57171913-57172756	Novel 3'UTR (Extended)	4	1	57171913	4
zgc:77880	NM_001016218 dnz1 chr1:9481775-9489350 (+), ENSDART00000043881 zgc:77880 chr1:9481713-9491309 (+)	chr1:9481713-9491309	+	1	Annotated and revised	5	772	833	chr1:9490537-9491308	Known 3'UTR	726	2	9491308	569	9491370	157	Novel 3'UTR (Shortened)	31	3	9490733	4	9490782	13	9491071	14
si:ch211-165a10.3	ENSDART00000132585 si:ch211-165a10.3 chr1:44500797-44503424 (-)	chr1:44500797-44503424	-	0	No 3P tags	-	0	0
med19b	ENSDART00000137980 med19b chr1:45037846-45046967 (+), ENSDART00000003022 med19b chr1:45037940-45046664 (+)	chr1:45037846-45046967	+	1	Only annotated	2	303	301	chr1:45046664-45046965	Known 3'UTR	1936	2	45046965	1897	45046973	39
BX569798.1	ENSDART00000054787 BX569798.1 chr1:10841251-10849905 (+)	chr1:10841251-10849905	+	0	Only extended	5	0	5762	chr1:10849905-10854732	Novel 3'UTR (Extended)	36	5	10851723	6	10853218	6	10854732	11	10855426	8	10855776	5
CASC5	ENSDART00000102929 CASC5 chr1:10270506-10290582 (-), ENSDART00000147648 CASC5 chr1:10270507-10288356 (-)	chr1:10270506-10290582	-	1	Only annotated	2	113	113	chr1:10270506-10270619	Known 3'UTR	2778	2	10270506	2404	10270532	374
CABZ01084505.1	ENSDART00000057946 CABZ01084505.1 chr1:59777307-59777994 (-)	chr1:59777307-59777994	-	0	No 3P tags	-	0	0
BX569778.1	ENSDART00000054790 BX569778.1 chr1:10957100-10958420 (-)	chr1:10957100-10958420	-	0	Only extended	3	0	3919	chr1:10953065-10957100	Novel 3'UTR (Extended)	24	3	10952629	4	10953011	8	10953065	12
CABZ01059391.1	ENSDART00000059982 CABZ01059391.1 chr1:56989378-56990032 (-)	chr1:56989378-56990032	-	0	None associated with 3' UTR	0	0	0
si:ch73-6k14.1	ENSDART00000111598 si:ch73-6k14.1 chr1:49728967-49732289 (-)	chr1:49728967-49732289	-	1	Only extended	1	184	589	chr1:49728562-49729151	Novel 3'UTR (Extended)	1180	1	49728562	1180
ASPG (2 of 2)	ENSDART00000147527 ASPG (2 of 2) chr1:45385934-45388572 (-)	chr1:45385934-45388572	-	1	Only annotated	5	11	80	chr1:45385929-45385945	Known 3'UTR	598	5	45385851	14	45385865	36	45385900	6	45385914	44	45385929	498
SLITRK6	ENSDART00000128124 SLITRK6 chr1:3427786-3430649 (-), ENSDART00000121523 SLITRK6 chr1:3429062-3479522 (-)	chr1:3427786-3479522	-	0	Only extended	3	0	2328		Novel 3'UTR (Extended)	60	3	3426734	17	3426922	7	3426938	36
zgc:136791	ENSDART00000129831 zgc:136791 chr1:55313286-55324592 (+), ENSDART00000144759 zgc:136791 chr1:55306352-55324593 (+)	chr1:55306352-55324593	+	1	Annotated and revised	3	871	870	chr1:55323722-55324592	Known 3'UTR	308	1	55324592	308	Novel 3'UTR (Shortened)	17	2	55324173	5	55324330	12
PCNP	ENSDART00000146682 PCNP chr1:6497450-6501545 (-), ENSDART00000134213 PCNP chr1:6497883-6501461 (-), ENSDART00000140189 PCNP chr1:6497507-6501504 (-), ENSDART00000054925 PCNP chr1:6497300-6501545 (-), ENSDART00000101586 PCNP chr1:6497387-6501557 (-)	chr1:6497300-6501557	-	4	Annotated and revised	5	552	549		Known 3'UTR	2990	4	6497291	44	6497303	2446	6497425	401	6497506	99	Novel 3'UTR (Alternative last exon)	4	1	6498141	4
lrpap1	ENSDART00000043552 lrpap1 chr1:41512495-41522415 (+), ENSDART00000145272 lrpap1 chr1:41512452-41522418 (+)	chr1:41512452-41522418	+	1	Annotated and revised	3	925	2475	chr1:41521493-41522411	Known 3'UTR	3600	2	41522411	2919	41522429	681	Novel 3'UTR (Extended)	20	1	41523968	20
CABZ01021530.1	ENSDART00000134180 CABZ01021530.1 chr1:53208508-53209057 (+)	chr1:53208508-53209057	+	0	No 3P tags	-	0	0
ing2	ENSDART00000110880 ing2 chr1:40343979-40377036 (-), ENSDART00000005775 ing2 chr1:40343978-40346258 (-)	chr1:40343978-40377036	-	1	Annotated and revised	3	543	966	chr1:40343981-40344521	Known 3'UTR	2245	1	40343981	2245	Novel 3'UTR (Extended)	85	2	40343555	22	40343619	63
TMEM132A	ENSDART00000126296 TMEM132A chr1:45441382-45452806 (+)	chr1:45441382-45452806	+	0	Only extended	1	0	174	chr1:45452806-45452980	Novel 3'UTR (Extended)	60	1	45452980	60
CR848663.2	ENSDART00000147099 CR848663.2 chr1:44588783-44590396 (-)	chr1:44588783-44590396	-	0	No 3P tags	-	0	0
BX927114.4	ENSDART00000128972 BX927114.4 chr1:58482374-58483019 (+)	chr1:58482374-58483019	+	0	No 3P tags	-	0	0
si:dkeyp-80c12.8	ENSDART00000144349 si:dkeyp-80c12.8 chr1:49864093-49868304 (-)	chr1:49864093-49868304	-	1	Annotated and revised	2	251	249	chr1:49864095-49864344	Known 3'UTR	240	1	49864095	240	Novel 3'UTR (Shortened)	4	1	49864235	4
ube2k	ENSDART00000025770 ube2k chr1:22085996-22096682 (+), ENSDART00000139003 ube2k chr1:22085710-22097063 (+)	chr1:22085710-22097063	+	2	Annotated and revised	9	1615	1677	chr1:22095448-22095893	Known 3'UTR	36	2	22097108	5	22097125	31	Novel 3'UTR (Shortened)	206	7	22095793	20	22095877	28	22095893	137	22096326	5	22096409	5	22096486	6	22096509	5
alkbh5	NM_001193988 ALKBH5 chr1:7585205-7587979 (+), ENSDART00000091683 alkbh5 chr1:7584836-7592679 (+)	chr1:7584836-7592679	+	1	Annotated and revised	14	134	1795	chr1:7592545-7592678	Known 3'UTR	2705	3	7592678	2647	7592691	49	7592713	9	Novel 3'UTR (Extended)	675	11	7593135	7	7593476	7	7593644	106	7593667	7	7593688	30	7593741	98	7593863	24	7593882	7	7594274	30	7594294	8	7594340	351
SON	ENSDART00000113095 SON chr1:683991-706241 (-)	chr1:683991-706241	-	0	Only extended	4	0	712	chr1:683500-683991	Novel 3'UTR (Extended)	669	4	683279	5	683488	6	683500	518	683705	140
CR626902.2	ENSDART00000134129 CR626902.2 chr1:57542386-57547466 (+)	chr1:57542386-57547466	+	0	None associated with 3' UTR	0	0	0
lig4	ENSDART00000085648 lig4 chr1:28198482-28202115 (+)	chr1:28198482-28202115	+	1	Annotated and revised	3	305	1558	chr1:28201810-28202100	Known 3'UTR	69	2	28202100	58	28202141	11	Novel 3'UTR (Extended)	8	1	28203368	8
arl11	ENSDART00000053221 arl11 chr1:47149743-47151627 (+)	chr1:47149743-47151627	+	1	Only Novel 3'UTR (Shortened)	1	1263	184	chr1:47150364-47150548	Novel 3'UTR (Shortened)	44	1	47150548	44
CU550716.4	ENSDART00000114197 CU550716.4 chr1:59245731-59249008 (-)	chr1:59245731-59249008	-	1	Only annotated	1	791	791	chr1:59245731-59246522	Known 3'UTR	5	1	59245731	5
med28	ENSDART00000054442 med28 chr1:20092031-20095242 (+), ENSDART00000145661 med28 chr1:20092049-20094734 (+)	chr1:20092031-20095242	+	2	Only annotated	3	346	345		Known 3'UTR	2370	3	20095241	2196	20095255	142	20095280	32
si:dkey-22i16.7	ENSDART00000132038 si:dkey-22i16.7 chr1:44328148-44331346 (-)	chr1:44328148-44331346	-	1	Only annotated	1	185	190	chr1:44328143-44328333	Known 3'UTR	7	1	44328143	7
TMOD1	NM_001166116 TMOD1 chr1:11527854-11548118 (+), ENSDART00000111485 TMOD1 chr1:11527848-11554350 (+)	chr1:11527848-11554350	+	1	Only extended	2	195	2536	chr1:11554155-11556691	Novel 3'UTR (Extended)	63	2	11556691	57	11556714	6
pcid2	ENSDART00000018741 pcid2 chr1:48009-53546 (-)	chr1:48009-53546	-	2	Annotated and revised	7	308	427	chr1:48114-48317	Known 3'UTR	600	3	48009	521	48025	74	48044	5	Novel 3'UTR (Extended)	95	1	47890	95	Novel 3'UTR (Shortened)	617	3	48114	588	48124	17	48164	12
FARP1 (1 of 2)	ENSDART00000143361 FARP1 (1 of 2) chr1:2058759-2165912 (+), ENSDART00000142944 FARP1 (1 of 2) chr1:2058759-2200996 (+), ENSDART00000108919 FARP1 (1 of 2) chr1:2058746-2151759 (+), ENSDART00000108619 FARP1 (1 of 2) chr1:2078169-2200558 (+)	chr1:2058746-2200996	+	2	Annotated and revised	4	438	7265		Known 3'UTR	116	1	2200903	116	Novel 3'UTR (Extended)	1292	3	2173177	505	2202876	8	2202902	779
LPHN3	ENSDART00000146871 LPHN3 chr1:21717644-21814452 (-), ENSDART00000144208 LPHN3 chr1:21717644-21931677 (-), ENSDART00000086797 LPHN3 chr1:21717645-21846734 (-), ENSDART00000042366 LPHN3 chr1:21868671-21884903 (-)	chr1:21717644-21931677	-	1	Annotated and revised	3	1716	2723		Known 3'UTR	2066	2	21717645	2056	21717657	10	Novel 3'UTR (Extended)	9	1	21716637	9
EPN3 (2 of 2)	ENSDART00000062841 EPN3 (2 of 2) chr1:57678408-57686541 (-), NM_017957 EPN3 chr1:57678176-57686541 (-)	chr1:57678176-57686541	-	1	Only extended	7	1	2534	chr1:57677821-57678408	Novel 3'UTR (Extended)	73	7	57675838	5	57675874	6	57675973	6	57676858	17	57676947	6	57677810	7	57677821	26
as3mt	ENSDART00000057879 as3mt chr1:31160639-31176847 (+)	chr1:31160639-31176847	+	1	Annotated and revised	3	146	323	chr1:31176701-31176839	Known 3'UTR	427	1	31176839	427	Novel 3'UTR (Extended)	194	2	31177024	169	31177047	25
C1H2orf55 (2 of 2)	ENSDART00000108523 C1H2orf55 (2 of 2) chr1:50192938-50205475 (+), ENSDART00000140824 C1H2orf55 (2 of 2) chr1:50192806-50204509 (+), ENSDART00000136747 C1H2orf55 (2 of 2) chr1:50188710-50194784 (+)	chr1:50188710-50205475	+	1	Annotated and revised	6	714	712		Known 3'UTR	262	3	50205473	177	50205487	21	50205499	64	Novel 3'UTR (Shortened)	74	3	50205263	4	50205342	59	50205361	11
spock3	ENSDART00000078295 spock3 chr1:19416580-19487596 (+), ENSDART00000145418 spock3 chr1:19416493-19476419 (+), ENSDART00000102969 spock3 chr1:19416690-19487600 (+), ENSDART00000139461 spock3 chr1:19416575-19481760 (+), ENSDART00000148518 spock3 chr1:19416517-19486383 (+)	chr1:19416493-19487600	+	2	Annotated and revised	3	1299	1295		Known 3'UTR	3221	1	19487596	3221	Novel 3'UTR (Shortened)	66	2	19487167	25	19487449	41
aptx	ENSDART00000029252 aptx chr1:53148485-53154211 (-)	chr1:53148485-53154211	-	1	Only extended	3	104	3627	chr1:53148287-53148589	Novel 3'UTR (Extended)	1365	3	53144962	6	53148277	15	53148287	1344
si:ch73-222h13.1	ENSDART00000111387 si:ch73-222h13.1 chr1:9959834-9965692 (-), ENSDART00000139749 si:ch73-222h13.1 chr1:9959772-9982728 (-), ENSDART00000128335 si:ch73-222h13.1 chr1:9970529-9981189 (-)	chr1:9959772-9982728	-	1	Annotated and revised	5	62	673		Known 3'UTR	149	2	9959763	4	9959773	145	Novel 3'UTR (Extended)	18	3	9959161	9	9959508	5	9959593	4
si:dkey-9i23.8	ENSDART00000139044 si:dkey-9i23.8 chr1:45258271-45267492 (-)	chr1:45258271-45267492	-	1	No 3P tags	-	61	61
kal1a	ENSDART00000007522 kal1a chr1:31396988-31433511 (+), NM_001104849 kal1.1 chr1:31397040-31432244 (+)	chr1:31396988-31433511	+	1	Only extended	3	375	1036	chr1:31433136-31434094	Novel 3'UTR (Extended)	630	3	31433879	5	31434084	47	31434094	578
g3bp2	NM_001006150 G3BP1 chr1:25328222-25345739 (+), ENSDART00000046376 g3bp2 chr1:25327573-25348017 (+)	chr1:25327573-25348017	+	1	Only annotated	1	2062	2061	chr1:25345955-25348016	Known 3'UTR	2596	1	25348016	2596
si:ch211-15j1.3	ENSDART00000145009 si:ch211-15j1.3 chr1:58836502-58839946 (+), ENSDART00000137836 si:ch211-15j1.3 chr1:58836444-58838210 (+)	chr1:58836444-58839946	+	0	No 3P tags	-	0	0
si:dkey-222h21.5	ENSDART00000147678 si:dkey-222h21.5 chr1:58990261-58991551 (+)	chr1:58990261-58991551	+	0	None associated with 3' UTR	0	0	0
cdk2ap2	ENSDART00000101620 cdk2ap2 chr1:40402045-40408329 (-), ENSDART00000136613 cdk2ap2 chr1:40406746-40408329 (-), ENSDART00000142701 cdk2ap2 chr1:40402045-40407993 (-), ENSDART00000133836 cdk2ap2 chr1:40402048-40408297 (-), ENSDART00000144987 cdk2ap2 chr1:40406760-40408300 (-)	chr1:40402045-40408329	-	2	Only annotated	4	303	290		Known 3'UTR	3837	4	40402027	582	40402043	1714	40406739	392	40406759	1149
si:dkey-9i23.5	ENSDART00000145895 si:dkey-9i23.5 chr1:45236326-45239036 (+), ENSDART00000131280 si:dkey-9i23.5 chr1:45238052-45238804 (+)	chr1:45236326-45239036	+	1	No 3P tags	-	211	211
SP6	NM_001108833 Sp6 chr1:59981019-59981403 (+), ENSDART00000126914 SP6 chr1:59980600-59981744 (+)	chr1:59980600-59981744	+	1	Only annotated	2	209	209	chr1:59981535-59981744	Known 3'UTR	600	2	59981732	14	59981744	586
CALHM1 (2 of 2)	ENSDART00000132171 CALHM1 (2 of 2) chr1:50008967-50011848 (-), ENSDART00000101001 CALHM1 (2 of 2) chr1:50008652-50011851 (-)	chr1:50008652-50011851	-	0	Only extended	1	0	1051		Novel 3'UTR (Extended)	11	1	50007916	11
C1H20orf7	ENSDART00000138878 C1H20orf7 chr1:51731041-51739160 (+), ENSDART00000088092 C1H20orf7 chr1:51731041-51739159 (+)	chr1:51731041-51739160	+	1	Only annotated	3	148	232	chr1:51739012-51739161	Known 3'UTR	3533	3	51739161	3423	51739171	74	51739244	36
ARHGEF38	ENSDART00000112263 ARHGEF38 chr1:25302595-25319959 (+), ENSDART00000146412 ARHGEF38 chr1:25294083-25320408 (+)	chr1:25294083-25320408	+	1	No 3P tags	-	449	449
ugt5b3;ugt5b4	ENSDART00000080323 ugt5b4 chr1:8707080-8728780 (-), ENSDART00000123725 ugt5b3 chr1:8712143-8713829 (-), ENSDART00000128441 ugt5b4 chr1:8707080-8717920 (-), ENSDART00000122512 ugt5b3 chr1:8712061-8717929 (-), ENSDART00000121490 ugt5b4 chr1:8707080-8717920 (-), ENSDART00000126996 ugt5b3 chr1:8713445-8728809 (-)	chr1:8707080-8728809	-	2	Annotated and revised	3	476	476		Known 3'UTR	233	2	8707080	211	8711988	22	Novel 3'UTR (Extended)	56	1	8711907	56
slc43a3a	ENSDART00000083213 slc43a3a chr1:44693716-44708951 (+), NM_021398 Slc43a3 chr1:44693764-44705448 (+)	chr1:44693716-44708951	+	0	Only extended	1	0	780	chr1:44708951-44709460	Novel 3'UTR (Extended)	66	1	44709460	66
SPP2	ENSDART00000133225 SPP2 chr1:28688681-28692942 (-)	chr1:28688681-28692942	-	1	Only annotated	1	375	369	chr1:28688687-28689056	Known 3'UTR	15	1	28688687	15
efnb2b	ENSDART00000085203 efnb2b chr1:6398651-6424064 (+)	chr1:6398651-6424064	+	1	Only extended	2	58	2771	chr1:6424006-6426777	Novel 3'UTR (Extended)	243	2	6426103	4	6426777	239
CABZ01058871.1	ENSDART00000125801 CABZ01058871.1 chr1:58026123-58026424 (-)	chr1:58026123-58026424	-	0	No 3P tags	-	0	0
CR790369.1	ENSDART00000122508 CR790369.1 chr1:55962302-55964271 (+)	chr1:55962302-55964271	+	0	No 3P tags	-	0	0
cdkn2b	ENSDART00000054209 cdkn2b chr1:25011640-25013676 (-)	chr1:25011640-25013676	-	0	Only extended	3	0	1828	chr1:25010017-25011640	Novel 3'UTR (Extended)	741	3	25009812	16	25010017	721	25011152	4
CU914621.3	ENSDART00000141143 CU914621.3 chr1:59076223-59087049 (+)	chr1:59076223-59087049	+	0	None associated with 3' UTR	0	0	0
tapt1b	ENSDART00000086867 tapt1b chr1:21544348-21577241 (-)	chr1:21544348-21577241	-	1	Annotated and revised	2	2293	2292	chr1:21544349-21546641	Known 3'UTR	551	1	21544349	551	Novel 3'UTR (Shortened)	7	1	21546030	7
junb	ENSDART00000122628 junb chr1:52226931-52228460 (-)	chr1:52226931-52228460	-	1	Only annotated	1	348	348	chr1:52226931-52227279	Known 3'UTR	2881	1	52226931	2881
si:dkey-9i23.16	ENSDART00000141145 si:dkey-9i23.16 chr1:45396508-45401702 (+)	chr1:45396508-45401702	+	1	Only extended	1	223	3494	chr1:45401479-45404973	Novel 3'UTR (Extended)	269	1	45404973	269
TESK1 (1 of 2)	ENSDART00000112133 TESK1 (1 of 2) chr1:40601009-40618639 (-), ENSDART00000146680 TESK1 (1 of 2) chr1:40603357-40619684 (-)	chr1:40601009-40619684	-	2	Annotated and revised	4	2931	2931	chr1:40601009-40603940	Known 3'UTR	1140	1	40601009	1140	Novel 3'UTR (Shortened)	30	3	40602069	6	40602442	15	40603520	9
zcchc7	ENSDART00000077799 zcchc7 chr1:20394059-20431265 (-), ENSDART00000142751 zcchc7 chr1:20392902-20548992 (-), ENSDART00000102837 zcchc7 chr1:20483378-20548971 (-), ENSDART00000129066 zcchc7 chr1:20392903-20548971 (-)	chr1:20392902-20548992	-	1	Annotated and revised	2	1708	1707		Known 3'UTR	1284	1	20392903	1284	Novel 3'UTR (Shortened)	30	1	20394459	30
DCAF15	ENSDART00000108601 DCAF15 chr1:54636219-54651493 (+)	chr1:54636216-54651493	+	1	Annotated and revised	3	475	857	chr1:54651018-54651495	Known 3'UTR	644	1	54651495	644	Novel 3'UTR (Extended)	7	1	54651875	7	Novel 3'UTR (Shortened)	31	1	54651143	31
si:dkey-56e3.3	ENSDART00000111367 si:dkey-56e3.3 chr1:41978618-41988629 (+)	chr1:41978618-41988629	+	1	Annotated and revised	5	438	531	chr1:41988191-41988629	Known 3'UTR	69	4	41988606	4	41988619	4	41988629	57	41988722	4	Novel 3'UTR (Shortened)	12	1	41988426	12
si:dkey-9i23.15	ENSDART00000134635 si:dkey-9i23.15 chr1:45380899-45384465 (-)	chr1:45380899-45384465	-	1	Only annotated	4	434	428	chr1:45380905-45381333	Known 3'UTR	390	4	45380889	27	45380905	351	45380951	8	45380990	4
CR407598.1	ENSDART00000121591 CR407598.1 chr1:29885834-29897118 (-)	chr1:29885834-29897118	-	0	No 3P tags	-	0	0
zgc:56685	ENSDART00000015372 zgc:56685 chr1:774781-775204 (-), NM_001030329 hist1h2aa chr1:774835-775204 (-)	chr1:774781-775204	-	0	Annotated and revised	3	0	615	chr1:774715-774781	Known 3'UTR	40975	1	774715	40975	Novel 3'UTR (Extended)	35	2	774207	11	774220	24
CABZ01058873.4	ENSDART00000146545 CABZ01058873.4 chr1:57961713-57963560 (-), ENSDART00000139804 CABZ01058873.4 chr1:57961174-57963542 (-)	chr1:57961174-57963560	-	0	No 3P tags	-	0	0
zgc:91844	ENSDART00000037986 zgc:91844 chr1:34318085-34327046 (+)	chr1:34318085-34327047	+	1	Annotated and revised	5	343	1297	chr1:34326704-34327045	Known 3'UTR	959	2	34327045	935	34327057	24	Novel 3'UTR (Extended)	83	2	34327500	34	34328001	49	Novel 3'UTR (Shortened)	72	1	34326770	72
cx41.8	ENSDART00000101104 cx41.8 chr1:47911840-47928560 (-), NM_001198964 GJA5 chr1:47913128-47913947 (-)	chr1:47911840-47928560	-	1	No 3P tags	-	994	994
si:ch73-109d9.1	ENSDART00000073746 si:ch73-109d9.1 chr1:44402932-44423718 (-), ENSDART00000148932 si:ch73-109d9.1 chr1:44393991-44407568 (-)	chr1:44393991-44423718	-	1	Annotated and revised	3	26	3438		Known 3'UTR	247	1	44393998	247	Novel 3'UTR (Extended)	435	2	44399481	133	44399494	302
si:ch211-213b8.4	ENSDART00000141348 si:ch211-213b8.4 chr1:54069590-54090067 (+)	chr1:54069590-54090067	+	0	None associated with 3' UTR	0	0	0
UNC93B1	NM_001100253 unc93b1 chr1:44853399-44873169 (+), ENSDART00000025145 UNC93B1 chr1:44852041-44875455 (+)	chr1:44852041-44875455	+	1	Annotated and revised	8	2085	4125	chr1:44873370-44875440	Known 3'UTR	107	3	44875440	85	44875455	16	44875485	6	Novel 3'UTR (Extended)	101	3	44876487	4	44876595	30	44877294	67	Novel 3'UTR (Shortened)	16	2	44873698	9	44874020	7
si:ch211-114l13.7	ENSDART00000081122 si:ch211-114l13.7 chr1:58701200-58722813 (-), NM_001131781 GLT25D2 chr1:58700006-58710335 (-)	chr1:58700006-58722813	-	1	Only revised	2	1132	5254	chr1:58697464-58701200	Novel 3'UTR (Extended)	112	1	58697464	112	Novel 3'UTR (Shortened)	4	1	58701393	4
sts	ENSDART00000146602 sts chr1:31505552-31531445 (+), ENSDART00000075252 sts chr1:31507023-31531134 (+)	chr1:31505552-31531445	+	1	None associated with 3' UTR	0	281	0
zgc:171517	ENSDART00000102542 zgc:171517 chr1:23151250-23155390 (+)	chr1:23151250-23155390	+	1	Only annotated	1	47	45	chr1:23155343-23155388	Known 3'UTR	30612	1	23155388	30612
CABZ01058873.3	ENSDART00000127878 CABZ01058873.3 chr1:57983886-57989617 (-)	chr1:57983886-57989617	-	0	None associated with 3' UTR	0	0	0
ptpn9b	ENSDART00000114514 ptpn9b chr1:17836442-17854829 (+)	chr1:17836442-17854829	+	1	Only extended	8	266	2789	chr1:17854563-17856767	Novel 3'UTR (Extended)	1273	8	17855297	8	17855391	7	17855480	6	17855486	7	17856767	575	17856890	450	17856972	197	17857352	23
CU896655.8	ENSDART00000140677 CU896655.8 chr1:59355225-59357654 (-)	chr1:59355225-59357654	-	0	No 3P tags	-	0	0
CABZ01058867.1	ENSDART00000031329 CABZ01058867.1 chr1:58081165-58082686 (-)	chr1:58081165-58082686	-	0	None associated with 3' UTR	0	0	0
si:ch211-113e8.11	ENSDART00000113954 si:ch211-113e8.11 chr1:40500328-40507760 (+)	chr1:40500328-40507760	+	1	Only Novel 3'UTR (Shortened)	5	3000	1450	chr1:40504760-40506210	Novel 3'UTR (Shortened)	926	5	40504780	4	40504790	19	40505461	10	40506139	14	40506210	879
HGSNAT	ENSDART00000109911 HGSNAT chr1:13953061-13983028 (+)	chr1:13953061-13983028	+	1	Annotated and revised	6	3046	3046	chr1:13979982-13983028	Known 3'UTR	2084	1	13983028	2084	Novel 3'UTR (Shortened)	164	5	13980759	14	13980815	6	13980850	12	13980884	6	13982799	126
CABZ01059392.1	ENSDART00000091924 CABZ01059392.1 chr1:56993312-56995701 (+)	chr1:56993312-56995701	+	0	None associated with 3' UTR	0	0	0
CU896655.4	ENSDART00000073801 CU896655.4 chr1:59263865-59276086 (-)	chr1:59263865-59276086	-	0	Only extended	2	0	4008	chr1:59263387-59263865	Novel 3'UTR (Extended)	9	2	59259857	4	59263387	5
CU302202.3	ENSDART00000101900 CU302202.3 chr1:58307307-58314200 (+)	chr1:58307307-58314200	+	0	No 3P tags	-	0	0
si:dkey-222h21.6	ENSDART00000135300 si:dkey-222h21.6 chr1:58980076-59003251 (+), ENSDART00000140536 si:dkey-222h21.6 chr1:58977302-58980682 (+)	chr1:58977302-59003251	+	0	None associated with 3' UTR	0	0	0
si:ch211-198k9.6	ENSDART00000114536 si:ch211-198k9.6 chr1:28108758-28110572 (+), ENSDART00000101876 si:ch211-198k9.6 chr1:28108972-28110487 (+)	chr1:28108758-28110572	+	1	No 3P tags	-	300	300
rac1l	ENSDART00000018622 rac1l chr1:57493451-57494030 (-), NM_073285 chw-1 chr1:57489352-57489667 (-), NM_001140962 rho1 chr1:57489349-57493880 (-)	chr1:57489349-57494030	-	0	None associated with 3' UTR	0	0	0
EIF5B	ENSDART00000144245 EIF5B chr1:46396057-46406699 (+), ENSDART00000074689 EIF5B chr1:46396046-46426613 (+)	chr1:46396046-46426613	+	1	Annotated and revised	7	835	3052		Known 3'UTR	936	2	46426613	927	46426627	9	Novel 3'UTR (Extended)	22	3	46427978	5	46428520	6	46428830	11	Novel 3'UTR (Shortened)	14	2	46426117	4	46426267	10
RPS6	ENSDART00000023336 RPS6 chr1:45499246-45505056 (-)	chr1:45499246-45505056	-	2	Only annotated	1	42	42	chr1:45499246-45499288	Known 3'UTR	12637	1	45499246	12637
CU928197.1	ENSDART00000122445 CU928197.1 chr1:54296203-54311074 (-)	chr1:54296197-54311077	-	1	Only extended	4	6	4331	chr1:54292651-54296203	Novel 3'UTR (Extended)	1968	4	54291872	18	54292651	1935	54295858	7	54295992	8
gli1	ENSDART00000049151 gli1 chr1:30667485-30744303 (+), ENSDART00000123101 gli1 chr1:30726796-30746919 (+)	chr1:30667485-30746919	+	2	Only annotated	1	2792	2796	chr1:30744127-30746923	Known 3'UTR	127	1	30746923	127
slc43a1b	NM_001198810 SLC43A1 chr1:45048925-45078102 (-), ENSDART00000081835 slc43a1b chr1:45046969-45093536 (-)	chr1:45046969-45093536	-	1	Only annotated	1	1881	1885	chr1:45046965-45048850	Known 3'UTR	153	1	45046965	153
C1H1orf96 (2 of 2)	ENSDART00000037729 C1H1orf96 (2 of 2) chr1:54521737-54532906 (+)	chr1:54521737-54532906	+	1	Annotated and revised	4	3778	3779	chr1:54529128-54532907	Known 3'UTR	747	1	54532907	747	Novel 3'UTR (Shortened)	29	3	54529366	19	54529384	5	54531451	5
eed	ENSDART00000059345 eed chr1:581650-588152 (-)	chr1:581650-588152	-	1	Only annotated	1	82	82	chr1:581650-581732	Known 3'UTR	1455	1	581650	1455
dnah7l	ENSDART00000137429 dnah7l chr1:21009217-21014522 (+), ENSDART00000054388 dnah7l chr1:20841664-21057496 (+), ENSDART00000141317 dnah7l chr1:20837615-21057441 (+)	chr1:20837615-21057496	+	0	None associated with 3' UTR	0	0	0
cdc25d	ENSDART00000109089 cdc25d chr1:55260649-55274851 (-)	chr1:55260649-55274851	-	1	Annotated and revised	3	256	588	chr1:55260585-55260905	Known 3'UTR	15	2	55260585	9	55260651	6	Novel 3'UTR (Extended)	6	1	55260317	6
sertad2a	ENSDART00000133915 sertad2a chr1:55652647-55658073 (-), ENSDART00000142348 sertad2a chr1:55652128-55655781 (-)	chr1:55652128-55658073	-	1	Annotated and revised	4	133	1367		Known 3'UTR	59	1	55652145	59	Novel 3'UTR (Extended)	138	3	55651280	9	55651928	19	55651940	110
INHBE	ENSDART00000059762 INHBE chr1:30609326-30615423 (+)	chr1:30609326-30615429	+	1	Only extended	3	6	3096	chr1:30615423-30618519	Novel 3'UTR (Extended)	98	3	30617455	4	30618451	12	30618519	82
FAM193A	ENSDART00000075216 FAM193A chr1:37162967-37212687 (+)	chr1:37162967-37212691	+	1	Only annotated	2	933	922	chr1:37211754-37212676	Known 3'UTR	1003	2	37212676	575	37212692	428
foxe1	NM_001160456 LOC100301610 chr1:25668423-25668918 (-), ENSDART00000109297 foxe1 chr1:25667934-25668999 (-)	chr1:25667934-25668999	-	0	Only extended	1	0	1051	chr1:25667372-25667934	Novel 3'UTR (Extended)	9	1	25667372	9
si:ch211-15j1.6	ENSDART00000134949 si:ch211-15j1.6 chr1:58792707-58798199 (-), ENSDART00000141787 si:ch211-15j1.6 chr1:58792131-58801668 (-)	chr1:58792131-58801668	-	1	Annotated and revised	3	576	590	chr1:58792117-58792707	Known 3'UTR	63	1	58792117	63	Novel 3'UTR (Shortened)	12	2	58792240	5	58792350	7
CABZ01052573.2	ENSDART00000122050 CABZ01052573.2 chr1:60198284-60201640 (+)	chr1:60198284-60201640	+	0	No 3P tags	-	0	0
sox1b	ENSDART00000010894 sox1b chr1:46691463-46693213 (+)	chr1:46691463-46693213	+	2	Annotated and revised	4	516	3799	chr1:46692697-46693213	Known 3'UTR	309	1	46693213	309	Novel 3'UTR (Extended)	21	2	46694802	7	46696496	14	Novel 3'UTR (Shortened)	7	1	46693107	7
kcnq5b	ENSDART00000085370 kcnq5b chr1:30191199-30406008 (-), ENSDART00000148069 kcnq5b chr1:30191219-30245075 (-)	chr1:30191199-30406008	-	1	Annotated and revised	3	736	736	chr1:30191199-30191935	Known 3'UTR	286	1	30191199	286	Novel 3'UTR (Shortened)	11	2	30191330	7	30191349	4
ankrd10a	ENSDART00000150133 ankrd10a chr1:28071590-28073108 (+), ENSDART00000053926 ankrd10a chr1:28071623-28094988 (+), ENSDART00000141441 ankrd10a chr1:28093119-28094992 (+)	chr1:28071590-28094992	+	1	Annotated and revised	5	508	969		Known 3'UTR	2144	2	28094988	2073	28095046	71	Novel 3'UTR (Extended)	9	1	28095453	9	Novel 3'UTR (Shortened)	75	2	28094763	65	28094840	10
spast	ENSDART00000035150 spast chr1:51530600-51548157 (-)	chr1:51530600-51548157	-	1	Annotated and revised	5	534	2754	chr1:51530602-51531134	Known 3'UTR	1431	3	51530582	33	51530602	1383	51530609	15	Novel 3'UTR (Extended)	65	2	51528380	19	51528498	46
GPR183 (3 of 3)	ENSDART00000101763 GPR183 (3 of 3) chr1:29610139-29611225 (+), NM_001109386 Gpr183 chr1:29610178-29611135 (+)	chr1:29610139-29611225	+	0	No 3P tags	-	0	0
cyp3a65	ENSDART00000113943 cyp3a65 chr1:60208633-60218577 (+), NM_001105095 cyp3a40 chr1:60208667-60215690 (+)	chr1:60208633-60218577	+	1	Only annotated	1	438	438	chr1:60218139-60218577	Known 3'UTR	421	1	60218577	421
ZNF654	ENSDART00000114384 ZNF654 chr1:33280362-33296386 (+)	chr1:33280362-33296386	+	1	Annotated and revised	3	1121	1121	chr1:33295265-33296386	Known 3'UTR	732	2	33296319	65	33296386	667	Novel 3'UTR (Shortened)	11	1	33295761	11
DENND1C	ENSDART00000137237 DENND1C chr1:56748397-56760631 (-), ENSDART00000062505 DENND1C chr1:56737835-56760494 (-), ENSDART00000142505 DENND1C chr1:56742304-56760494 (-)	chr1:56737835-56760631	-	0	Only extended	4	0	4809		Novel 3'UTR (Extended)	46	4	56731041	15	56732503	22	56734992	5	56735017	4
ugt5b6	ENSDART00000016750 ugt5b6 chr1:8719112-8723043 (-), ENSDART00000123773 ugt5b6 chr1:8721358-8728809 (-), ENSDART00000126877 ugt5b6 chr1:8721358-8728809 (-), ENSDART00000127735 ugt5b6 chr1:8719059-8728625 (-)	chr1:8719059-8728809	-	2	Only extended	5	89	742		Novel 3'UTR (Extended)	714	5	8718370	6	8718602	15	8718913	23	8718932	656	8720978	14
WFS1 (1 of 2)	ENSDART00000090025 WFS1 (1 of 2) chr1:13198594-13222764 (-)	chr1:13198594-13222764	-	0	Only extended	3	0	3680	chr1:13196652-13198594	Novel 3'UTR (Extended)	118	3	13194914	15	13196652	72	13198035	31
si:dkey-22i16.10	ENSDART00000114781 si:dkey-22i16.10 chr1:44389642-44391500 (+), ENSDART00000131337 si:dkey-22i16.10 chr1:44386173-44391806 (+)	chr1:44386173-44391806	+	1	None associated with 3' UTR	0	160	0
casp3a	ENSDART00000140076 casp3a chr1:16269272-16273422 (+), ENSDART00000005593 casp3a chr1:16269272-16278202 (+), ENSDART00000139702 casp3a chr1:16269236-16273437 (+), ENSDART00000131927 casp3a chr1:16269825-16273707 (+)	chr1:16269236-16278202	+	1	Annotated and revised	9	1788	4957		Known 3'UTR	2454	4	16278131	4	16278202	2375	16278215	62	16278288	13	Novel 3'UTR (Extended)	79	2	16278498	17	16278664	62	Novel 3'UTR (Shortened)	56	3	16276617	11	16276633	9	16277001	36
BSPRY (9 of 9)	ENSDART00000101645 BSPRY (9 of 9) chr1:58661394-58666430 (+)	chr1:58661394-58666430	+	1	Only annotated	1	3242	3242	chr1:58663188-58666430	Known 3'UTR	5	1	58666430	5
zgc:111991	ENSDART00000054441 zgc:111991 chr1:60031623-60033162 (+)	chr1:60031623-60033162	+	0	Only extended	1	0	531	chr1:60033162-60033809	Novel 3'UTR (Extended)	733	1	60033809	733
ildr1a	NM_001096392 ildr1 chr1:566963-568319 (+), ENSDART00000131042 ildr1a chr1:566148-571141 (+)	chr1:566148-571141	+	1	Annotated and revised	4	673	673	chr1:570468-571141	Known 3'UTR	2833	2	571118	23	571141	2810	Novel 3'UTR (Shortened)	13	2	570706	8	570885	5
USO1 (1 of 2)	ENSDART00000130805 USO1 (1 of 2) chr1:25455781-25483997 (+), NM_001093001 LOC446301 chr1:25442422-25466771 (+)	chr1:25442422-25483997	+	0	Only extended	4	0	1050	chr1:25483997-25484869	Novel 3'UTR (Extended)	377	4	25484257	69	25484368	39	25484869	192	25485047	77
abca1a	ENSDART00000142465 abca1a chr1:53057960-53123070 (+), ENSDART00000051558 abca1a chr1:53057960-53120449 (+)	chr1:53057960-53123070	+	1	Annotated and revised	3	2621	2620	chr1:53120449-53123069	Known 3'UTR	1051	1	53123069	1051	Novel 3'UTR (Shortened)	29	2	53121594	25	53122567	4
UBE2F	ENSDART00000103701 UBE2F chr1:5509779-5527331 (+), ENSDART00000138919 UBE2F chr1:5509823-5526029 (+), ENSDART00000144641 UBE2F chr1:5509736-5526134 (+)	chr1:5509736-5527331	+	3	Annotated and revised	3	1421	3307	chr1:5525910-5527329	Known 3'UTR	650	1	5527329	650	Novel 3'UTR (Extended)	11	1	5529217	11	Novel 3'UTR (Shortened)	10	1	5526779	10
rfx1b	ENSDART00000005646 rfx1b chr1:54655301-54674053 (-), ENSDART00000148382 rfx1b chr1:54655316-54674075 (-)	chr1:54655301-54674075	-	1	Annotated and revised	6	665	3771	chr1:54655301-54655966	Known 3'UTR	865	2	54655301	859	54655311	6	Novel 3'UTR (Extended)	46	4	54652195	5	54653110	9	54653616	19	54653840	13
CT573492.1	ENSDART00000109349 CT573492.1 chr1:23260924-23264642 (+)	chr1:23260924-23264642	+	0	Only annotated	2	0	23	chr1:23264642-23264665	Known 3'UTR	93	2	23264648	45	23264665	48
sod3	ENSDART00000132436 sod3 chr1:40383063-40384231 (+)	chr1:40383063-40384231	+	1	Only extended	1	193	503	chr1:40384038-40384541	Novel 3'UTR (Extended)	4	1	40384541	4
b3gnt2a	NM_001102497 B3GNT2 chr1:54029821-54030574 (-), ENSDART00000074221 b3gnt2a chr1:54029575-54031260 (-)	chr1:54029575-54031260	-	1	Only extended	3	168	4256	chr1:54025565-54029743	Novel 3'UTR (Extended)	250	3	54025565	234	54025661	7	54027737	9
NLRX1 (3 of 41)	ENSDART00000097774 NLRX1 (3 of 41) chr1:37558369-37562777 (+)	chr1:37558369-37562777	+	1	No 3P tags	-	74	74
exosc1	ENSDART00000083633 exosc1 chr1:55240066-55245449 (-)	chr1:55240066-55245449	-	1	Only extended	3	14	2496	chr1:55237584-55240080	Novel 3'UTR (Extended)	1087	3	55237584	1067	55237607	12	55237857	8
DUSP27	ENSDART00000123097 DUSP27 chr1:619433-626314 (+), ENSDART00000126069 DUSP27 chr1:620920-626454 (+), ENSDART00000125062 DUSP27 chr1:620971-626299 (+)	chr1:619433-626454	+	1	Only annotated	2	140	140		Known 3'UTR	231	2	626349	25	626454	206
CU896655.6	ENSDART00000122068 CU896655.6 chr1:59372954-59383273 (-)	chr1:59372954-59383273	-	0	Only extended	1	0	434	chr1:59372520-59372954	Novel 3'UTR (Extended)	4	1	59372520	4
SOD3 (2 of 2)	ENSDART00000112150 SOD3 (2 of 2) chr1:40353470-40354049 (+)	chr1:40353470-40354049	+	0	None associated with 3' UTR	0	0	0
A2LD1 (2 of 3)	NM_001200559 a2ldb chr1:2208676-2208976 (-), ENSDART00000055779 A2LD1 (2 of 3) chr1:2206950-2209919 (-)	chr1:2206950-2209919	-	1	Annotated and revised	3	1438	1438	chr1:2206950-2208388	Known 3'UTR	509	1	2206950	509	Novel 3'UTR (Shortened)	12	2	2207211	4	2207282	8
tm9sf2	ENSDART00000019743 tm9sf2 chr1:28743379-28769615 (+)	chr1:28743379-28769615	+	1	Annotated and revised	5	935	1624	chr1:28768680-28769611	Known 3'UTR	225	2	28769562	6	28769611	219	Novel 3'UTR (Extended)	12	1	28770304	12	Novel 3'UTR (Shortened)	8	2	28769037	4	28769157	4
TEKT4	ENSDART00000049010 TEKT4 chr1:55153166-55161637 (-)	chr1:55153166-55161637	-	1	Annotated and revised	5	805	801	chr1:55153170-55153971	Known 3'UTR	630	3	55153170	545	55153228	79	55153242	6	Novel 3'UTR (Shortened)	23	2	55153657	8	55153778	15
CU550716.1	ENSDART00000127281 CU550716.1 chr1:59187102-59187882 (-), ENSDART00000073516 CU550716.1 chr1:59187099-59187882 (-)	chr1:59187099-59187882	-	0	No 3P tags	-	0	0
CC2D1A	ENSDART00000110818 CC2D1A chr1:55755228-55778413 (-), NM_001126913 cc2d1a chr1:55762436-55773666 (-)	chr1:55755228-55778413	-	0	Only extended	7	0	4092	chr1:55751136-55755228	Novel 3'UTR (Extended)	167	7	55751136	60	55752267	10	55753528	21	55754041	18	55754916	47	55754932	6	55754978	5
rnf11	ENSDART00000018817 rnf11 chr1:52625138-52632239 (+)	chr1:52625138-52632239	+	1	Annotated and revised	4	2026	2027	chr1:52630213-52632240	Known 3'UTR	1808	1	52632240	1808	Novel 3'UTR (Shortened)	33	3	52630568	9	52630695	16	52630786	8
f7	ENSDART00000013209 f7 chr1:15961-21248 (+)	chr1:15961-21248	+	1	Annotated and revised	2	491	487	chr1:20757-21244	Known 3'UTR	459	1	21244	459	Novel 3'UTR (Shortened)	13	1	20846	13
AL929150.1	ENSDART00000074058 AL929150.1 chr1:55517969-55536713 (-)	chr1:55517969-55536713	-	0	Only extended	5	0	2563	chr1:55513603-55517969	Novel 3'UTR (Extended)	208	5	55513603	149	55513612	27	55513775	10	55515406	18	55517310	4
fga	ENSDART00000135522 fga chr1:9142183-9147506 (-), ENSDART00000033118 fga chr1:9142183-9147623 (-), ENSDART00000080442 fga chr1:9141768-9142962 (-)	chr1:9141768-9147623	-	1	Only annotated	1	1074	1072		Known 3'UTR	433	1	9142185	433
CNRIP1 (2 of 2)	ENSDART00000130828 CNRIP1 (2 of 2) chr1:52102724-52115356 (-)	chr1:52102724-52115356	-	1	Annotated and revised	6	843	891	chr1:52102676-52103567	Known 3'UTR	397	5	52102644	46	52102665	96	52102676	108	52102719	106	52102758	41	Novel 3'UTR (Shortened)	19	1	52102942	19
atp1a1	ENSDART00000081047 atp1a1 chr1:1468925-1488350 (+)	chr1:1468925-1488350	+	2	Annotated and revised	3	214	5063	chr1:1488136-1493199	Known 3'UTR	6602	2	1488338	41	1488349	6561	Novel 3'UTR (Extended)	7005	1	1493199	7005
melk	ENSDART00000047728 melk chr1:20696353-20716785 (-), ENSDART00000125259 melk chr1:20696017-20715668 (-)	chr1:20696017-20716785	-	2	Annotated and revised	8	654	2040	chr1:20696353-20696671	Known 3'UTR	940	4	20696017	176	20696341	9	20696353	738	20696433	17	Novel 3'UTR (Extended)	74	3	20694631	4	20694989	39	20695833	31	Novel 3'UTR (Shortened)	14	1	20696535	14
G3BP2 (1 of 3)	NM_001093037 g3bp2 chr1:25421055-25423628 (+), ENSDART00000132535 G3BP2 (1 of 3) chr1:25421061-25438574 (+)	chr1:25421055-25438574	+	0	Only extended	2	0	2084	chr1:25438574-25440658	Novel 3'UTR (Extended)	2557	2	25439123	4	25440658	2553
C1H15orf23	ENSDART00000109858 C1H15orf23 chr1:10291238-10301481 (+)	chr1:10291238-10301481	+	1	Only annotated	4	451	541	chr1:10301030-10301483	Known 3'UTR	2270	4	10301421	46	10301483	2192	10301494	28	10301571	4
CNGA1 (2 of 2)	ENSDART00000134649 CNGA1 (2 of 2) chr1:44276757-44281942 (-), ENSDART00000048225 CNGA1 (2 of 2) chr1:44277044-44279254 (-)	chr1:44276757-44281942	-	1	Only extended	1	287	1022	chr1:44276022-44277044	Novel 3'UTR (Extended)	15	1	44276022	15
dmd	ENSDART00000102903 dmd chr1:10008301-10258954 (-), ENSDART00000007013 dmd chr1:10008203-10098074 (-), ENSDART00000148305 dmd chr1:10009846-10024899 (-), ENSDART00000126518 dmd chr1:10036865-10068820 (-), ENSDART00000009886 dmd chr1:10008203-10068890 (-), ENSDART00000141052 dmd chr1:10008301-10031304 (-)	chr1:10008203-10258954	-	3	Annotated and revised	8	199	2820		Known 3'UTR	105	2	10008204	101	10008256	4	Novel 3'UTR (Extended)	142	6	10005582	40	10005737	6	10005806	34	10005918	4	10007553	12	10007894	46
si:dkey-27n6.4	ENSDART00000149006 si:dkey-27n6.4 chr1:37502166-37512340 (-), ENSDART00000149165 si:dkey-27n6.4 chr1:37502062-37513631 (-), ENSDART00000108572 si:dkey-27n6.4 chr1:37502111-37519672 (-), ENSDART00000149341 si:dkey-27n6.4 chr1:37501872-37534246 (-), ENSDART00000135010 si:dkey-27n6.4 chr1:37517914-37530155 (-)	chr1:37501872-37534246	-	3	No 3P tags	-	239	239
smarca5	ENSDART00000024215 smarca5 chr1:53288210-53316592 (+), ENSDART00000123972 smarca5 chr1:53288129-53316645 (+)	chr1:53288129-53316645	+	2	Only annotated	2	420	419	chr1:53316225-53316592	Known 3'UTR	10670	2	53316592	10223	53316644	447
TRIM35 (41 of 43)	ENSDART00000073777 TRIM35 (41 of 43) chr1:58725920-58735885 (+)	chr1:58725920-58735885	+	1	Annotated and revised	4	1778	1782	chr1:58734107-58735889	Known 3'UTR	59	1	58735889	59	Novel 3'UTR (Shortened)	39	3	58734125	13	58734136	22	58734185	4
MFAP4 (8 of 12)	ENSDART00000149436 MFAP4 (8 of 12) chr1:59849609-59851252 (-), ENSDART00000100203 MFAP4 (8 of 12) chr1:59849610-59851138 (-)	chr1:59849609-59851252	-	1	Only extended	1	1	686	chr1:59848924-59849610	Novel 3'UTR (Extended)	190	1	59848924	190
ENDOD1 (1 of 10)	ENSDART00000139443 ENDOD1 (1 of 10) chr1:7698785-7700966 (-)	chr1:7698785-7700966	-	0	No 3P tags	-	0	0
fbxl18	ENSDART00000103644 fbxl18 chr1:7714245-7723025 (-)	chr1:7714245-7723025	-	1	Only annotated	2	298	311	chr1:7714232-7714543	Known 3'UTR	904	2	7714232	893	7714292	11
ppp3r1b	ENSDART00000100869 ppp3r1b chr1:52066633-52100204 (-)	chr1:52066633-52100204	-	2	Annotated and revised	7	2020	2020	chr1:52066633-52068653	Known 3'UTR	1364	1	52066633	1364	Novel 3'UTR (Shortened)	673	6	52066738	302	52066967	7	52066982	24	52067731	38	52068182	297	52068198	5
btr01	ENSDART00000073689 btr01 chr1:45519442-45531891 (+)	chr1:45519442-45531891	+	0	Only extended	3	0	3106	chr1:45531891-45533141	Novel 3'UTR (Extended)	129	3	45531994	4	45533141	100	45534997	25
MTUS1 (2 of 2)	ENSDART00000048855 MTUS1 (2 of 2) chr1:15282564-15359635 (+), NM_001112947 mtus1 chr1:15355750-15358854 (+)	chr1:15282564-15359635	+	1	Annotated and revised	3	724	724	chr1:15358911-15359635	Known 3'UTR	1766	1	15359635	1766	Novel 3'UTR (Shortened)	102	2	15359262	79	15359279	23
ITGAL	ENSDART00000065640 ITGAL chr1:60006660-60019406 (-)	chr1:60006660-60019406	-	1	Only annotated	1	359	346	chr1:60006673-60007019	Known 3'UTR	279	1	60006673	279
si:dkey-24h22.5	ENSDART00000140157 si:dkey-24h22.5 chr1:33954254-33968433 (-)	chr1:33954254-33968433	-	1	None associated with 3' UTR	0	437	0
si:ch73-343l4.8	ENSDART00000110562 si:ch73-343l4.8 chr1:56446166-56447431 (+), ENSDART00000147516 si:ch73-343l4.8 chr1:56442874-56447831 (+)	chr1:56442874-56447831	+	1	Only revised	3	394	1669		Novel 3'UTR (Extended)	53	1	56449100	53	Novel 3'UTR (Shortened)	20	2	56447567	8	56447636	12
si:dkeyp-9d4.2	ENSDART00000041462 si:dkeyp-9d4.2 chr1:6895148-6897901 (+), ENSDART00000143881 si:dkeyp-9d4.2 chr1:6893922-6897443 (+)	chr1:6893922-6897901	+	2	Only annotated	1	812	812	chr1:6897089-6897901	Known 3'UTR	151	1	6897901	151
si:dkey-66n24.2	ENSDART00000149876 si:dkey-66n24.2 chr1:36056474-36059494 (-), ENSDART00000144631 si:dkey-66n24.2 chr1:36057092-36059609 (-), ENSDART00000148467 si:dkey-66n24.2 chr1:36057089-36059609 (-), ENSDART00000148560 si:dkey-66n24.2 chr1:36057092-36058281 (-), ENSDART00000150203 si:dkey-66n24.2 chr1:36057177-36059505 (-), ENSDART00000149616 si:dkey-66n24.2 chr1:36057079-36058338 (-), ENSDART00000148975 si…	chr1:36056474-36059609	-	4	No 3P tags	-	580	580
zgc:56493	NM_001132431 TXN chr1:40659059-40659306 (+), ENSDART00000045697 zgc:56493 chr1:40656188-40663079 (+)	chr1:40656188-40663079	+	1	Only annotated	3	237	230	chr1:40662842-40663072	Known 3'UTR	8576	3	40662988	10	40663046	88	40663072	8478
CABZ01058873.1	ENSDART00000017279 CABZ01058873.1 chr1:57994650-57997793 (-)	chr1:57994650-57997793	-	1	Only annotated	1	1108	1108	chr1:57994650-57995758	Known 3'UTR	5	1	57994650	5
map9	ENSDART00000054225 map9 chr1:24595167-24607057 (-), ENSDART00000133937 map9 chr1:24595166-24607288 (-)	chr1:24595166-24607288	-	1	Annotated and revised	4	417	416	chr1:24595167-24595583	Known 3'UTR	468	1	24595167	468	Novel 3'UTR (Shortened)	37	3	24595357	15	24595516	12	24595567	10
srd5a2a	ENSDART00000064007 srd5a2a chr1:51575992-51582450 (+)	chr1:51575992-51582450	+	2	Only annotated	2	236	216	chr1:51582214-51582430	Known 3'UTR	99	2	51582430	78	51582444	21
GLRA3	ENSDART00000009777 GLRA3 chr1:38827488-38873612 (-)	chr1:38827488-38873612	-	0	Only extended	3	0	1986	chr1:38825636-38827488	Novel 3'UTR (Extended)	239	3	38825502	4	38825636	225	38826088	10
rtn4rl2a	NM_178570 RTN4RL2 chr1:44947852-44948527 (+), ENSDART00000073736 rtn4rl2a chr1:44946554-44949026 (+)	chr1:44946554-44949026	+	1	Only extended	3	85	2588	chr1:44948941-44951115	Novel 3'UTR (Extended)	2184	3	44949980	7	44949991	772	44951115	1405
zgc:174945	ENSDART00000103550 zgc:174945 chr1:9812181-9816727 (-)	chr1:9812181-9816727	-	1	Annotated and revised	2	1638	1638	chr1:9812181-9813819	Known 3'UTR	27	1	9812181	27	Novel 3'UTR (Shortened)	4	1	9813699	4
dachb	ENSDART00000103535 dachb chr1:9554808-9672902 (+), ENSDART00000046283 dachb chr1:9554808-9624627 (+), ENSDART00000132076 dachb chr1:9554808-9672912 (+), ENSDART00000103531 dachb chr1:9554945-9624083 (+)	chr1:9554808-9672912	+	2	Only extended	1	589	650		Novel 3'UTR (Extended)	652	1	9624733	652
cep97	ENSDART00000128927 cep97 chr1:600016-604250 (-), ENSDART00000036682 cep97 chr1:599607-603993 (-)	chr1:599607-604250	-	1	Only annotated	1	409	409	chr1:599607-600016	Known 3'UTR	304	1	599607	304
arglu1b	ENSDART00000013264 arglu1b chr1:6760700-6772194 (+)	chr1:6760694-6772194	+	1	Annotated and revised	5	1259	1259	chr1:6770935-6771718	Known 3'UTR	1445	1	6772194	1445	Novel 3'UTR (Shortened)	2730	4	6771718	2192	6771729	412	6771781	54	6771804	72
chmp2bl	ENSDART00000018472 chmp2bl chr1:33191235-33201926 (+), ENSDART00000125682 chmp2bl chr1:33191230-33201916 (+)	chr1:33191230-33201926	+	1	Annotated and revised	7	1199	1193	chr1:33200727-33201024	Known 3'UTR	538	2	33201854	13	33201920	525	Novel 3'UTR (Shortened)	745	5	33201024	669	33201037	12	33201366	37	33201379	20	33201450	7
HS3ST6	ENSDART00000132638 HS3ST6 chr1:52759056-52787161 (-), ENSDART00000083940 HS3ST6 chr1:52759056-52787853 (-)	chr1:52759056-52787853	-	0	None associated with 3' UTR	0	0	0
nrp2a	ENSDART00000125437 nrp2a chr1:4561943-4565752 (-), ENSDART00000103769 nrp2a chr1:4495203-4565751 (-)	chr1:4495203-4565752	-	1	Annotated and revised	2	1884	1883		Known 3'UTR	2068	1	4495204	2068	Novel 3'UTR (Extended)	6	1	4561483	6
MFAP4 (2 of 12)	ENSDART00000131567 MFAP4 (2 of 12) chr1:59728645-59729564 (-)	chr1:59728645-59729564	-	0	Only extended	2	0	289	chr1:59728356-59728645	Novel 3'UTR (Extended)	5066	2	59728356	4801	59728368	265
cpe	ENSDART00000078271 cpe chr1:19648161-19692601 (-)	chr1:19648161-19692601	-	1	Annotated and revised	3	4069	4068	chr1:19648162-19652230	Known 3'UTR	7713	2	19648162	7379	19648182	334	Novel 3'UTR (Shortened)	23	1	19651589	23
CABZ01036821.1	ENSDART00000122496 CABZ01036821.1 chr1:56636768-56639220 (-)	chr1:56636768-56639220	-	0	No 3P tags	-	0	0
si:ch211-269i23.2	ENSDART00000132466 si:ch211-269i23.2 chr1:30128657-30161633 (-), ENSDART00000111307 si:ch211-269i23.2 chr1:30128969-30160382 (-), ENSDART00000138113 si:ch211-269i23.2 chr1:30129074-30139792 (-)	chr1:30128657-30161633	-	1	Only revised	4	312	2881		Novel 3'UTR (Extended)	608	3	30125760	16	30127885	10	30127966	582	Novel 3'UTR (Shortened)	7	1	30128861	7
MFAP4 (4 of 12)	ENSDART00000043516 MFAP4 (4 of 12) chr1:59830856-59832712 (-)	chr1:59830856-59832712	-	1	Only annotated	1	108	189	chr1:59830775-59830964	Known 3'UTR	179	1	59830775	179
cbr1	ENSDART00000053152 cbr1 chr1:47662948-47670284 (+)	chr1:47662948-47670284	+	1	Annotated and revised	5	2928	2997	chr1:47667356-47670283	Known 3'UTR	2346	2	47670283	2326	47670353	20	Novel 3'UTR (Shortened)	64	3	47668666	10	47669565	5	47669609	49
HSF2BP	ENSDART00000075546 HSF2BP chr1:28041807-28069751 (-), ENSDART00000133246 HSF2BP chr1:28032620-28069793 (-)	chr1:28032620-28069793	-	2	Annotated and revised	3	316	378		Known 3'UTR	35	2	28032618	23	28041748	12	Novel 3'UTR (Extended)	17	1	28041440	17
CU550716.2	ENSDART00000099238 CU550716.2 chr1:59167907-59169365 (-)	chr1:59167907-59169365	-	0	None associated with 3' UTR	0	0	0
parn	ENSDART00000030873 parn chr1:60290607-60304899 (+), NM_001030629 PARN chr1:60291001-60297281 (+)	chr1:60290607-60304899	+	1	Annotated and revised	4	4953	4953	chr1:60299946-60300396	Known 3'UTR	185	1	60304899	185	Novel 3'UTR (Shortened)	3559	3	60300090	6	60300381	4	60300396	3549
DRD5 (2 of 2)	NM_001204677 Apoa chr1:13257607-13257910 (+), ENSDART00000046874 DRD5 (2 of 2) chr1:13257424-13258486 (+)	chr1:13257424-13258486	+	0	None associated with 3' UTR	0	0	0
zgc:174928	ENSDART00000127941 zgc:174928 chr1:59179871-59181335 (-), ENSDART00000127718 zgc:174928 chr1:59172037-59184715 (-), ENSDART00000073862 zgc:174928 chr1:59172004-59173683 (-), ENSDART00000073836 zgc:174928 chr1:59172040-59180494 (-), ENSDART00000073833 zgc:174928 chr1:59177241-59181379 (-)	chr1:59172004-59184715	-	1	Annotated and revised	12	147	664		Known 3'UTR	145	1	59177202	145	Novel 3'UTR (Extended)	808	11	59171589	5	59171685	5	59171697	68	59171830	4	59176724	5	59176800	4	59176871	4	59176886	36	59177021	4	59177059	424	59177074	249
si:dkeyp-75b4.10	ENSDART00000110749 si:dkeyp-75b4.10 chr1:9071017-9076445 (+), ENSDART00000143719 si:dkeyp-75b4.10 chr1:9070894-9076445 (+)	chr1:9070894-9076445	+	1	Only annotated	1	148	148	chr1:9076297-9076445	Known 3'UTR	129	1	9076445	129
si:dkeyp-80c12.7	NM_001058389 Os03g0841800 chr1:49880664-49902948 (-), ENSDART00000074317 si:dkeyp-80c12.7 chr1:49876947-49915948 (-)	chr1:49876947-49915948	-	0	Only extended	8	0	5231	chr1:49871716-49876947	Novel 3'UTR (Extended)	546	8	49871716	471	49874250	4	49874987	7	49876181	8	49876212	11	49876299	4	49876361	19	49876400	22
ALG11	ENSDART00000049514 ALG11 chr1:28696176-28704187 (-), ENSDART00000136760 ALG11 chr1:28700261-28706326 (-), ENSDART00000140345 ALG11 chr1:28700027-28704187 (-)	chr1:28696176-28706326	-	1	Only revised	10	1298	4546		Novel 3'UTR (Extended)	85	4	28693782	5	28694662	45	28694911	10	28699592	25	Novel 3'UTR (Shortened)	603	6	28696948	14	28696964	336	28697145	10	28697213	191	28697228	42	28697238	10
NLRX1 (11 of 41)	ENSDART00000108632 NLRX1 (11 of 41) chr1:37719105-37730150 (-), ENSDART00000147906 NLRX1 (11 of 41) chr1:37719064-37746112 (-)	chr1:37719064-37746112	-	1	None associated with 3' UTR	0	41	0
NSUN7	ENSDART00000103003 NSUN7 chr1:18783253-18785561 (-)	chr1:18783253-18785561	-	0	No 3P tags	-	0	0
best2	NM_001080245 BEST1 chr1:52657567-52662942 (+), ENSDART00000111165 best2 chr1:52657567-52665061 (+)	chr1:52657567-52665061	+	0	No 3P tags	-	0	0
si:dkey-222h21.2	ENSDART00000148275 si:dkey-222h21.2 chr1:59040871-59053199 (+), ENSDART00000148079 si:dkey-222h21.2 chr1:59040796-59053199 (+), ENSDART00000140074 si:dkey-222h21.2 chr1:59040545-59041478 (+), ENSDART00000138698 si:dkey-222h21.2 chr1:59039798-59043826 (+)	chr1:59039798-59053199	+	0	None associated with 3' UTR	0	0	0
caly	ENSDART00000137179 caly chr1:49773284-49801458 (+), ENSDART00000052272 caly chr1:49777659-49802847 (+)	chr1:49773284-49802847	+	2	Annotated and revised	7	2616	2616	chr1:49800231-49802847	Known 3'UTR	3290	3	49802768	5	49802787	22	49802847	3263	Novel 3'UTR (Shortened)	58	4	49800425	31	49800568	5	49801256	9	49802447	13
C1H10orf28	ENSDART00000122551 C1H10orf28 chr1:55489773-55498014 (+)	chr1:55489773-55498014	+	1	Annotated and revised	2	729	729	chr1:55497200-55498014	Known 3'UTR	2766	1	55498014	2766	Novel 3'UTR (Shortened)	44	1	55497795	44
pkd2	ENSDART00000020412 pkd2 chr1:51045921-51064113 (+)	chr1:51045921-51064113	+	1	Annotated and revised	4	205	4115	chr1:51063908-51068023	Known 3'UTR	38	2	51064057	10	51064082	28	Novel 3'UTR (Extended)	1337	2	51065390	6	51068023	1331
psip1	ENSDART00000123655 psip1 chr1:27149901-27255466 (+), NM_001140420 psip1 chr1:27205379-27252307 (+)	chr1:27149901-27255466	+	1	Annotated and revised	2	258	1897	chr1:27255208-27255465	Known 3'UTR	1827	1	27255465	1827	Novel 3'UTR (Extended)	6	1	27257105	6
slc44a1	ENSDART00000134658 slc44a1 chr1:53128029-53146349 (+), ENSDART00000011725 slc44a1 chr1:53128314-53147096 (+)	chr1:53128029-53147096	+	0	Annotated and revised	7	0	1921		Known 3'UTR	4	1	53147148	4	Novel 3'UTR (Extended)	230	6	53147089	12	53147689	18	53148125	13	53148270	177	53148280	4	53152766	6
TSPAN5 (2 of 3)	NM_001078730 tspan5 chr1:11149242-11162776 (+), ENSDART00000080053 TSPAN5 (2 of 3) chr1:11148976-11165736 (+)	chr1:11148976-11165736	+	1	Only revised	12	989	6102	chr1:11164747-11170607	Novel 3'UTR (Extended)	913	9	11167709	38	11170063	92	11170101	25	11170302	14	11170479	21	11170607	554	11170623	129	11170635	33	11170849	7	Novel 3'UTR (Shortened)	279	3	11164965	30	11165076	242	11165333	7
si:ch211-287j19.6	ENSDART00000101143 si:ch211-287j19.6 chr1:47613227-47619221 (-)	chr1:47613227-47619221	-	1	Annotated and revised	5	950	947	chr1:47614021-47614525	Known 3'UTR	49	1	47613230	49	Novel 3'UTR (Shortened)	381	4	47613732	6	47613984	14	47614021	347	47614045	14
tcirg1	ENSDART00000145354 tcirg1 chr1:45340081-45356641 (-), ENSDART00000136419 tcirg1 chr1:45328313-45333276 (-), ENSDART00000033405 tcirg1 chr1:45327779-45354765 (-)	chr1:45327779-45356641	-	1	Only annotated	1	506	506		Known 3'UTR	72	1	45327779	72
CR786582.1	ENSDART00000099756 CR786582.1 chr1:34651058-34653304 (+), ENSDART00000128175 CR786582.1 chr1:34651876-34655406 (+), ENSDART00000101748 CR786582.1 chr1:34651876-34655406 (+)	chr1:34651058-34655406	+	0	None associated with 3' UTR	0	0	0
AL928650.4	NM_001193196 SLC29A4 chr1:7679928-7686502 (+), ENSDART00000110932 AL928650.4 chr1:7679205-7686562 (+)	chr1:7679205-7686562	+	0	Only extended	2	0	1974	chr1:7686562-7688476	Novel 3'UTR (Extended)	822	2	7686988	7	7688476	815
BSPRY (6 of 9);si:dkey-27n6.10	ENSDART00000109499 si:dkey-27n6.10 chr1:37406006-37417473 (+), ENSDART00000143709 BSPRY (6 of 9) chr1:37415011-37417470 (+), ENSDART00000147709 si:dkey-27n6.10 chr1:37403582-37408167 (+)	chr1:37403582-37417473	+	1	None associated with 3' UTR	0	263	0
scpp6	ENSDART00000108933 scpp6 chr1:44308673-44315791 (-), ENSDART00000121605 scpp6 chr1:44308672-44315791 (-)	chr1:44308672-44315791	-	1	Only extended	3	117	1006	chr1:44307908-44308789	Novel 3'UTR (Extended)	21	3	44307783	4	44307887	7	44307908	10
zc3h13	ENSDART00000054064 zc3h13 chr1:28711964-28743147 (+), ENSDART00000110816 zc3h13 chr1:28711964-28743079 (+)	chr1:28711964-28743147	+	2	Annotated and revised	7	548	3460		Known 3'UTR	1614	4	28743082	1122	28743148	448	28743230	15	28743240	29	Novel 3'UTR (Shortened)	755	2	28742854	11	28742973	744	Novel 3'UTR (Alternative last exon)	14	1	28735313	14
mmaa	ENSDART00000085021 mmaa chr1:35664549-35678374 (+), ENSDART00000148505 mmaa chr1:35664643-35671375 (+)	chr1:35664549-35678374	+	1	Annotated and revised	2	261	444		Known 3'UTR	2180	1	35678372	2180	Novel 3'UTR (Extended)	4	1	35671819	4
NDFIP2	ENSDART00000103724 NDFIP2 chr1:4243642-4283906 (-)	chr1:4243642-4283906	-	2	Annotated and revised	7	4517	4516	chr1:4243643-4252724	Known 3'UTR	4963	1	4243643	4963	Novel 3'UTR (Shortened)	170	6	4243944	7	4246739	28	4247651	15	4247726	106	4247966	5	4248046	9
F7 (2 of 3)	ENSDART00000109479 F7 (2 of 3) chr1:3799-15138 (+)	chr1:3799-15138	+	1	Annotated and revised	4	1172	1698	chr1:13620-15135	Known 3'UTR	450	1	15135	450	Novel 3'UTR (Extended)	31	1	15664	31	Novel 3'UTR (Shortened)	33	2	14519	24	14707	9
nup133	ENSDART00000020680 nup133 chr1:54485863-54508659 (+), ENSDART00000139388 nup133 chr1:54497141-54508660 (+)	chr1:54485863-54508660	+	1	Only annotated	2	104	103	chr1:54508556-54508659	Known 3'UTR	2966	2	54508630	298	54508659	2668
naa15b	ENSDART00000130490 naa15b chr1:41005886-41029284 (+), ENSDART00000040798 naa15b chr1:41005814-41031327 (+)	chr1:41005814-41031327	+	0	Only revised	1	0	368		Novel 3'UTR (Alternative last exon)	4	1	41015588	4
psen2	ENSDART00000006381 psen2 chr1:51558296-51571727 (-)	chr1:51558296-51571727	-	2	Annotated and revised	9	370	6018	chr1:51558377-51558666	Known 3'UTR	332	3	51558297	37	51558367	4	51558377	291	Novel 3'UTR (Extended)	373	6	51552648	5	51552892	150	51552910	143	51554550	4	51556481	66	51556690	5
SORCS3 (1 of 2)	NM_001191563 Sorcs1 chr1:48752184-48978478 (+), ENSDART00000110573 SORCS3 (1 of 2) chr1:48606635-49100620 (+)	chr1:48606635-49100620	+	0	None associated with 3' UTR	0	0	0
smcr8b	NM_001191919 Smcr8 chr1:7611198-7613610 (+), ENSDART00000021504 smcr8b chr1:7610781-7616134 (+)	chr1:7610781-7616134	+	1	Only annotated	1	407	428	chr1:7615727-7616155	Known 3'UTR	10	1	7616155	10
si:ch211-113e8.5	ENSDART00000136849 si:ch211-113e8.5 chr1:40591600-40593658 (+), ENSDART00000101649 si:ch211-113e8.5 chr1:40591623-40593200 (+)	chr1:40591600-40593658	+	1	Only annotated	1	458	453	chr1:40593200-40593653	Known 3'UTR	4	1	40593653	4
GCGR (1 of 2)	NM_001085752 gcgr chr1:56892006-56906975 (-), ENSDART00000021878 GCGR (1 of 2) chr1:56891751-56908189 (-)	chr1:56891751-56908189	-	0	Only extended	3	0	2766	chr1:56889240-56891751	Novel 3'UTR (Extended)	34	3	56889219	6	56889240	12	56890746	16
FAM83G (2 of 2)	ENSDART00000091508 FAM83G (2 of 2) chr1:7155447-7167743 (-), NM_138435 FAM83F chr1:7162074-7167461 (-)	chr1:7155447-7167743	-	1	Annotated and revised	5	2860	2860	chr1:7155447-7158543	Known 3'UTR	272	2	7155447	266	7155467	6	Novel 3'UTR (Shortened)	288	3	7156287	13	7156692	259	7157003	16
si:dkey-192k22.2	ENSDART00000142515 si:dkey-192k22.2 chr1:17292758-17305216 (+)	chr1:17292758-17305216	+	0	No 3P tags	-	0	0
CU915778.2	ENSDART00000124873 CU915778.2 chr1:44436223-44449278 (+)	chr1:44436223-44449278	+	1	Only annotated	1	2505	2505	chr1:44446773-44449278	Known 3'UTR	314	1	44449278	314
CABZ01059404.1	ENSDART00000129864 CABZ01059404.1 chr1:57067051-57071882 (+)	chr1:57067051-57071882	+	0	No 3P tags	-	0	0
tmem176	ENSDART00000137216 tmem176 chr1:45391030-45396431 (-), ENSDART00000097500 tmem176 chr1:45391049-45396308 (-), ENSDART00000134464 tmem176 chr1:45390919-45396408 (-)	chr1:45390919-45396431	-	2	Only annotated	2	252	251		Known 3'UTR	1760	2	45390920	1753	45390997	7
suclg1	ENSDART00000074609 suclg1 chr1:44034999-44067104 (-)	chr1:44034999-44067104	-	2	Annotated and revised	6	337	1424	chr1:44035001-44035336	Known 3'UTR	1702	1	44035001	1702	Novel 3'UTR (Extended)	163	2	44033912	154	44034695	9	Novel 3'UTR (Shortened)	31	3	44035155	11	44035165	14	44035183	6
morc3b	ENSDART00000074450 morc3b chr1:47675635-47699270 (+), ENSDART00000137448 morc3b chr1:47675658-47682073 (+)	chr1:47675635-47699270	+	1	Annotated and revised	5	566	559		Known 3'UTR	79	1	47699263	79	Novel 3'UTR (Shortened)	251	4	47698904	20	47699075	44	47699120	148	47699131	39
FAM13A	ENSDART00000080389 FAM13A chr1:51202170-51300156 (-), ENSDART00000110106 FAM13A chr1:51202459-51244989 (-)	chr1:51202170-51300156	-	0	Only extended	2	0	1297		Novel 3'UTR (Extended)	3142	2	51201038	3128	51201587	14
ufsp2	ENSDART00000078848 ufsp2 chr1:16441381-16453256 (-), ENSDART00000122670 ufsp2 chr1:16441371-16453571 (-), ENSDART00000148322 ufsp2 chr1:16441365-16453531 (-)	chr1:16441365-16453571	-	1	Annotated and revised	4	325	1021	chr1:16441386-16441690	Known 3'UTR	648	2	16441376	249	16441386	399	Novel 3'UTR (Extended)	33	2	16440669	18	16440683	15
prmt10	ENSDART00000148386 prmt10 chr1:36478977-36479827 (-), ENSDART00000053369 prmt10 chr1:36454192-36480262 (-), NM_001099051 PRMT10 chr1:36454424-36478924 (-)	chr1:36454192-36480262	-	1	Annotated and revised	3	160	494		Known 3'UTR	16	2	36454199	7	36454258	9	Novel 3'UTR (Extended)	14	1	36453930	14
etaa1	ENSDART00000112177 etaa1 chr1:52046089-52054756 (+)	chr1:52046089-52054756	+	1	Annotated and revised	9	383	647	chr1:52054373-52054756	Known 3'UTR	868	4	52054690	12	52054749	5	52054756	789	52054778	62	Novel 3'UTR (Extended)	221	4	52054869	9	52054943	80	52055002	6	52055020	126	Novel 3'UTR (Shortened)	10	1	52054514	10
C1H4orf27	ENSDART00000079716 C1H4orf27 chr1:12905186-12911525 (+)	chr1:12905186-12911525	+	1	Annotated and revised	3	755	755	chr1:12910770-12911525	Known 3'UTR	6446	2	12911441	7	12911525	6439	Novel 3'UTR (Shortened)	330	1	12910967	330
si:ch211-89o9.6	ENSDART00000114449 si:ch211-89o9.6 chr1:41868371-41873748 (+), ENSDART00000142508 si:ch211-89o9.6 chr1:41868310-41870740 (+)	chr1:41868310-41873748	+	2	Annotated and revised	5	606	1544		Known 3'UTR	3165	4	41870739	2417	41873667	565	41873746	156	41873760	27	Novel 3'UTR (Extended)	4	1	41874686	4
smcr7b	ENSDART00000121439 smcr7b chr1:7597406-7608091 (+), ENSDART00000141283 smcr7b chr1:7597415-7605897 (+), ENSDART00000019704 smcr7b chr1:7600300-7606594 (+), ENSDART00000103626 smcr7b chr1:7597406-7608093 (+)	chr1:7597406-7608093	+	1	Annotated and revised	12	1493	3951		Known 3'UTR	785	6	7606656	20	7607998	4	7608077	706	7608091	35	7608135	9	7608146	11	Novel 3'UTR (Extended)	97	3	7608927	5	7609547	87	7609848	5	Novel 3'UTR (Shortened)	22	3	7607241	9	7607895	7	7607911	6
fgf8b	ENSDART00000057885 fgf8b chr1:31092245-31097474 (+)	chr1:31092245-31097474	+	1	Only annotated	2	1198	1188	chr1:31096276-31097464	Known 3'UTR	164	2	31097464	153	31097475	11
si:ch211-138g9.3	ENSDART00000122362 si:ch211-138g9.3 chr1:46736182-46738183 (-), ENSDART00000143908 si:ch211-138g9.3 chr1:46735880-46741630 (-)	chr1:46735880-46741630	-	1	None associated with 3' UTR	0	156	0
arhgap10	ENSDART00000149022 arhgap10 chr1:36480068-36538290 (+), ENSDART00000109314 arhgap10 chr1:36480190-36621188 (+), ENSDART00000148640 arhgap10 chr1:36620040-36621189 (+), NM_001107389 Arhgap26 chr1:36539029-36616526 (+)	chr1:36480068-36621189	+	1	Annotated and revised	2	1059	1064		Known 3'UTR	1440	1	36621194	1440	Novel 3'UTR (Shortened)	4	1	36620704	4
FRMD7 (2 of 2)	NM_001078770 frmd7 chr1:9512786-9519103 (-), ENSDART00000109141 FRMD7 (2 of 2) chr1:9506237-9519118 (-)	chr1:9506237-9519118	-	0	Only extended	3	0	1746	chr1:9504295-9506237	Novel 3'UTR (Extended)	59	3	9504295	44	9504720	11	9505646	4
prom1b	ENSDART00000134831 prom1b chr1:21504466-21510018 (-), ENSDART00000045368 prom1b chr1:21487024-21531238 (-), ENSDART00000140920 prom1b chr1:21495081-21500327 (-), ENSDART00000102768 prom1b chr1:21487025-21531239 (-), ENSDART00000134719 prom1b chr1:21487024-21531239 (-)	chr1:21487024-21531239	-	1	Annotated and revised	2	1082	1277		Known 3'UTR	200	1	21487025	200	Novel 3'UTR (Extended)	55	1	21486829	55
c3c	NM_205405 C3 chr1:56824045-56851078 (+), ENSDART00000052683 c3c chr1:56821453-56867334 (+)	chr1:56821453-56867334	+	1	Annotated and revised	4	177	185	chr1:56867157-56867225	Known 3'UTR	43	3	56867235	5	56867278	14	56867342	24	Novel 3'UTR (Shortened)	27	1	56867225	27
si:ch211-134c9.2	ENSDART00000137138 si:ch211-134c9.2 chr1:20556617-20558296 (-)	chr1:20556617-20558296	-	1	None associated with 3' UTR	0	266	0
plk1	ENSDART00000081343 plk1 chr1:8229224-8237927 (+)	chr1:8229224-8237927	+	1	Annotated and revised	5	430	501	chr1:8237497-8237918	Known 3'UTR	8292	4	8237842	2600	8237918	5596	8237966	82	8237998	14	Novel 3'UTR (Shortened)	1681	1	8237777	1681
si:dkey-1h24.6	ENSDART00000132063 si:dkey-1h24.6 chr1:28599686-28603961 (-)	chr1:28599686-28603961	-	1	Annotated and revised	3	447	945	chr1:28599188-28600133	Known 3'UTR	4	1	28599590	4	Novel 3'UTR (Extended)	15	1	28599188	15	Novel 3'UTR (Shortened)	12	1	28600002	12
AL954695.2	ENSDART00000109627 AL954695.2 chr1:25517742-25519707 (+)	chr1:25517742-25519707	+	0	Only annotated	1	0	60	chr1:25519707-25519767	Known 3'UTR	4	1	25519767	4
uncx4.1	NM_017179 Uncx chr1:8365979-8369524 (+), ENSDART00000055009 uncx4.1 chr1:8366186-8370199 (+)	chr1:8365979-8370199	+	1	Only annotated	1	330	326	chr1:8369869-8370195	Known 3'UTR	18	1	8370195	18
zgc:91963	ENSDART00000147672 zgc:91963 chr1:41137786-41150722 (+), ENSDART00000080563 zgc:91963 chr1:41138119-41151045 (+)	chr1:41137786-41151045	+	0	No 3P tags	-	0	0
PLD6	NM_001016875 pld6 chr1:52698596-52701380 (-), ENSDART00000083946 PLD6 chr1:52697934-52705876 (-)	chr1:52697934-52705876	-	1	Only annotated	3	551	547	chr1:52697938-52698485	Known 3'UTR	589	3	52697938	551	52697999	26	52698023	12
tdrd7	ENSDART00000040307 tdrd7 chr1:11492070-11524487 (+), ENSDART00000112171 tdrd7 chr1:11492100-11524473 (+), ENSDART00000143839 tdrd7 chr1:11493058-11496021 (+), ENSDART00000103451 tdrd7 chr1:11492093-11524487 (+)	chr1:11492070-11524487	+	1	Annotated and revised	3	422	422		Known 3'UTR	571	1	11524487	571	Novel 3'UTR (Shortened)	3867	2	11524273	3860	11524332	7
FP015850.2	ENSDART00000130089 FP015850.2 chr1:59899716-59903474 (+)	chr1:59899716-59903474	+	0	Only extended	1	0	966	chr1:59903474-59904440	Novel 3'UTR (Extended)	4	1	59904440	4
RG9MTD1	ENSDART00000112581 RG9MTD1 chr1:383768-388445 (-), ENSDART00000144606 RG9MTD1 chr1:383581-388483 (-), ENSDART00000060954 RG9MTD1 chr1:382414-386877 (-), ENSDART00000148162 RG9MTD1 chr1:383768-388459 (-)	chr1:382414-388483	-	3	Only annotated	4	1441	274	chr1:383770-383855	Known 3'UTR	320	4	383581	84	383717	4	383757	34	383770	198
tll1	ENSDART00000054472 tll1 chr1:19514405-19607327 (-)	chr1:19514405-19607327	-	2	Only revised	5	1095	5861	chr1:19509639-19515500	Novel 3'UTR (Extended)	174	4	19509625	4	19509639	159	19513298	7	19513490	4	Novel 3'UTR (Shortened)	8	1	19514846	8
AL953865.1	ENSDART00000077796 AL953865.1 chr1:40624551-40625726 (+)	chr1:40624551-40625726	+	0	Only extended	1	0	211	chr1:40625726-40625937	Novel 3'UTR (Extended)	127	1	40625937	127
TXNDC11	ENSDART00000114770 TXNDC11 chr1:60280913-60289276 (-)	chr1:60280913-60289276	-	0	Only extended	7	0	960	chr1:60279953-60280913	Novel 3'UTR (Extended)	173	7	60279953	88	60279981	5	60280093	4	60280120	7	60280136	4	60280175	15	60280510	50
cnga3b	ENSDART00000027050 cnga3b chr1:9943232-9952650 (+), ENSDART00000137185 cnga3b chr1:9947576-9952650 (+)	chr1:9943232-9952650	+	0	None associated with 3' UTR	0	0	0
gria2a	ENSDART00000077805 gria2a chr1:20115771-20127124 (-), ENSDART00000102782 gria2a chr1:20115713-20192523 (-)	chr1:20115713-20192523	-	2	Only extended	2	518	1986		Novel 3'UTR (Extended)	3825	2	20114245	3821	20115412	4
rab3da	ENSDART00000023757 rab3da chr1:52673913-52693374 (-), ENSDART00000146372 rab3da chr1:52673841-52696205 (-), ENSDART00000143805 rab3da chr1:52676588-52696192 (-)	chr1:52673841-52696205	-	2	Only extended	6	308	2358		Novel 3'UTR (Extended)	656	6	52671555	8	52671828	15	52671833	436	52671851	95	52671870	6	52672025	96
cisd2	ENSDART00000137791 cisd2 chr1:44068854-44071101 (+), ENSDART00000074604 cisd2 chr1:44068770-44074661 (+)	chr1:44068770-44074661	+	2	Annotated and revised	6	780	781		Known 3'UTR	3034	1	44074662	3034	Novel 3'UTR (Shortened)	188	5	44070952	5	44073946	96	44074065	52	44074164	19	44074535	16
cha	ENSDART00000052992 cha chr1:52320997-52323243 (+)	chr1:52320997-52323243	+	1	No 3P tags	-	450	450
si:dkey-222h21.13	ENSDART00000149091 si:dkey-222h21.13 chr1:58928867-58944269 (+), ENSDART00000130630 si:dkey-222h21.13 chr1:58932764-58944269 (+)	chr1:58928867-58944269	+	0	No 3P tags	-	0	0
zgc:136908	ENSDART00000100551 zgc:136908 chr1:56326838-56350533 (-), NM_063304 cdc-48.2 chr1:56327237-56346830 (-)	chr1:56326838-56350533	-	1	Only annotated	2	207	258	chr1:56326840-56327045	Known 3'UTR	255	2	56326787	108	56326840	147
klf5a	ENSDART00000004361 klf5a chr1:34226170-34245294 (-)	chr1:34226170-34245294	-	2	Only Novel 3'UTR (Shortened)	4	4197	3777	chr1:34226590-34230367	Novel 3'UTR (Shortened)	294	4	34226578	25	34226590	246	34226962	5	34229499	18
si:dkeyp-13d11.2	ENSDART00000108599 si:dkeyp-13d11.2 chr1:38110682-38113173 (+), ENSDART00000132318 si:dkeyp-13d11.2 chr1:38110626-38113549 (+)	chr1:38110626-38113549	+	1	Only annotated	1	376	392	chr1:38113173-38113565	Known 3'UTR	4	1	38113565	4
PKN1 (2 of 2)	ENSDART00000084512 PKN1 (2 of 2) chr1:46226242-46306861 (+), ENSDART00000132555 PKN1 (2 of 2) chr1:46254578-46306860 (+)	chr1:46226242-46306861	+	1	Annotated and revised	8	3184	4976	chr1:46303677-46308653	Known 3'UTR	325	1	46306861	325	Novel 3'UTR (Extended)	956	3	46306993	4	46307145	4	46308653	948	Novel 3'UTR (Shortened)	123	4	46306465	29	46306494	6	46306726	29	46306737	59
CU915778.1	ENSDART00000125424 CU915778.1 chr1:44449882-44467566 (-)	chr1:44449882-44467566	-	1	Annotated and revised	3	2763	9739	chr1:44449882-44452645	Known 3'UTR	23	1	44449882	23	Novel 3'UTR (Extended)	7	1	44442906	7	Novel 3'UTR (Shortened)	6	1	44452468	6
CU861653.2	ENSDART00000127356 CU861653.2 chr1:6853649-6862055 (+), ENSDART00000130658 CU861653.2 chr1:6833335-6862151 (+), ENSDART00000128998 CU861653.2 chr1:6853649-6862151 (+)	chr1:6833335-6862151	+	1	Only extended	1	96	220	chr1:6862055-6862275	Novel 3'UTR (Extended)	137	1	6862275	137
MRPL16	ENSDART00000102421 MRPL16 chr1:399413-405632 (+), ENSDART00000020327 MRPL16 chr1:399084-405632 (+)	chr1:399084-405632	+	1	Annotated and revised	3	443	674	chr1:405189-405635	Known 3'UTR	1739	1	405635	1739	Novel 3'UTR (Extended)	29	2	405770	11	405863	18
AL953865.2	ENSDART00000109892 AL953865.2 chr1:40568933-40569953 (+)	chr1:40568933-40569953	+	0	Only extended	1	0	3062	chr1:40569953-40573015	Novel 3'UTR (Extended)	33	1	40573015	33
commd1	ENSDART00000100788 commd1 chr1:54045654-54059105 (-), ENSDART00000048349 commd1 chr1:54046453-54059982 (-)	chr1:54045654-54059982	-	1	Only extended	9	799	5224	chr1:54042924-54046453	Novel 3'UTR (Extended)	296	9	54041229	5	54041318	9	54042908	30	54042924	82	54044620	68	54044829	34	54044936	6	54045007	5	54045177	57
si:ch73-191k20.3	ENSDART00000148182 si:ch73-191k20.3 chr1:8054991-8056749 (-)	chr1:8054991-8056749	-	1	None associated with 3' UTR	0	382	0
si:ch73-343l4.4	ENSDART00000137078 si:ch73-343l4.4 chr1:56417149-56418343 (+)	chr1:56417149-56418343	+	0	No 3P tags	-	0	0
papss1	ENSDART00000123274 papss1 chr1:50993335-51040923 (-), ENSDART00000024984 papss1 chr1:50994668-51035047 (-)	chr1:50993335-51040923	-	2	Annotated and revised	12	1698	1909	chr1:50993338-50995033	Known 3'UTR	231	4	50993316	4	50993338	211	50993357	12	50993391	4	Novel 3'UTR (Extended)	106	3	50993090	18	50993114	27	50993124	61	Novel 3'UTR (Shortened)	35	5	50993490	5	50993606	6	50993749	4	50994304	14	50994429	6
TMEM55B (1 of 2)	ENSDART00000029774 TMEM55B (1 of 2) chr1:9494191-9501127 (+), NM_001014233 Tmem55b chr1:9496151-9500390 (+)	chr1:9494191-9501127	+	1	Annotated and revised	4	312	1426	chr1:9500815-9501134	Known 3'UTR	88	1	9501134	88	Novel 3'UTR (Extended)	132	3	9500715	12	9501633	33	9501816	87
BRAT1	ENSDART00000090689 BRAT1 chr1:10852001-10870648 (-)	chr1:10852001-10870648	-	1	Annotated and revised	2	63	191	chr1:10852001-10852064	Known 3'UTR	242	1	10852001	242	Novel 3'UTR (Extended)	17	1	10851873	17
helt	NM_001029887 HELT chr1:16336035-16336557 (+), ENSDART00000078889 helt chr1:16335286-16336940 (+)	chr1:16335286-16336940	+	1	Only annotated	1	92	91	chr1:16336848-16336939	Known 3'UTR	211	1	16336939	211
GPR152	ENSDART00000102431 GPR152 chr1:426971-432957 (-)	chr1:426971-432957	-	0	Only extended	1	0	2754	chr1:424217-426971	Novel 3'UTR (Extended)	256	1	424217	256
rps3a	ENSDART00000051763 rps3a chr1:23130371-23134510 (+)	chr1:23130371-23134510	+	1	Only annotated	1	45	44	chr1:23134465-23134509	Known 3'UTR	37922	1	23134509	37922
SAMD1 (1 of 2)	ENSDART00000109711 SAMD1 (1 of 2) chr1:56358088-56379852 (-), ENSDART00000137909 SAMD1 (1 of 2) chr1:56357455-56359920 (-)	chr1:56357455-56379852	-	1	Only extended	4	633	2159	chr1:56356779-56358088	Novel 3'UTR (Extended)	197	4	56355929	10	56356593	6	56356779	167	56356803	14
C1H13orf34	ENSDART00000127943 C1H13orf34 chr1:29779636-29784264 (+), ENSDART00000062628 C1H13orf34 chr1:29779714-29791053 (+), ENSDART00000127670 C1H13orf34 chr1:29779717-29790620 (+)	chr1:29779636-29791053	+	2	Only annotated	1	688	693		Known 3'UTR	828	1	29791058	828
hadh	ENSDART00000050603 hadh chr1:50416754-50426125 (-)	chr1:50416754-50426125	-	1	Annotated and revised	3	290	291	chr1:50416753-50417044	Known 3'UTR	1911	2	50416753	1907	50416770	4	Novel 3'UTR (Shortened)	4	1	50416938	4
ZMYND10	ENSDART00000017413 ZMYND10 chr1:21465389-21477477 (+), NM_001096803 zmynd10 chr1:21465672-21477312 (+)	chr1:21465389-21477477	+	1	Annotated and revised	6	99	960	chr1:21477378-21477599	Known 3'UTR	93	2	21477456	83	21477481	10	Novel 3'UTR (Extended)	218	4	21477599	202	21477613	8	21477682	4	21478272	4
xpa	ENSDART00000055566 xpa chr1:11192285-11221304 (-), NM_001141862 xpa chr1:11212935-11220614 (-)	chr1:11192285-11221304	-	1	Annotated and revised	10	58	2817	chr1:11191525-11198769	Known 3'UTR	12	1	11212894	12	Novel 3'UTR (Extended)	394	9	11191525	127	11191543	77	11192029	4	11192147	12	11210102	23	11210118	104	11210467	31	11210478	11	11212806	5
si:ch211-138g9.2	ENSDART00000074572 si:ch211-138g9.2 chr1:46525346-46527077 (+), ENSDART00000132705 si:ch211-138g9.2 chr1:46523563-46527684 (+)	chr1:46523563-46527684	+	1	No 3P tags	-	461	461
smc2	ENSDART00000008616 smc2 chr1:18280288-18304105 (+), ENSDART00000109416 smc2 chr1:18280193-18303696 (+)	chr1:18280193-18304105	+	1	Annotated and revised	5	378	368		Known 3'UTR	3373	1	18303686	3373	Novel 3'UTR (Shortened)	81	4	18303399	8	18303434	7	18303457	9	18303581	57
FBXO10 (1 of 2)	ENSDART00000141579 FBXO10 (1 of 2) chr1:18344283-18374048 (+), ENSDART00000143077 FBXO10 (1 of 2) chr1:18358693-18373981 (+), ENSDART00000111555 FBXO10 (1 of 2) chr1:18344283-18374048 (+), ENSDART00000088933 FBXO10 (1 of 2) chr1:18344283-18351568 (+)	chr1:18344283-18374048	+	0	Only extended	6	0	5031		Novel 3'UTR (Extended)	190	6	18374263	33	18374622	11	18375304	44	18377104	7	18377159	4	18379012	91
prkx	ENSDART00000136761 prkx chr1:32883162-32948941 (+), NM_001033963 Prkx chr1:32905216-32934442 (+)	chr1:32883162-32948941	+	1	Only annotated	1	3242	3241	chr1:32945699-32948940	Known 3'UTR	802	1	32948940	802
CHST12 (6 of 7)	ENSDART00000136093 CHST12 (6 of 7) chr1:10787132-10788026 (-), NM_001095506 chst12 chr1:10787246-10787945 (-)	chr1:10787132-10788026	-	0	Only extended	1	0	453	chr1:10786793-10787132	Novel 3'UTR (Extended)	48	1	10786793	48
col17a1a	ENSDART00000142957 col17a1a chr1:50074733-50112253 (+), ENSDART00000101004 col17a1a chr1:50083793-50111387 (+)	chr1:50074733-50112253	+	1	Annotated and revised	8	342	3978		Known 3'UTR	43	1	50112197	43	Novel 3'UTR (Extended)	3804	7	50112660	4	50112693	89	50112712	12	50112727	48	50112738	11	50112851	3636	50115365	4
mxd4	ENSDART00000141043 mxd4 chr1:24954456-24979160 (+), ENSDART00000059264 mxd4 chr1:24954624-24976033 (+)	chr1:24954456-24979160	+	1	Only revised	4	3127	3838	chr1:24976033-24979949	Novel 3'UTR (Extended)	343	1	24979949	343	Novel 3'UTR (Shortened)	32	3	24976231	15	24976392	12	24976407	5
AL935184.2	ENSDART00000130857 AL935184.2 chr1:24454560-24458030 (-)	chr1:24454560-24458030	-	0	None associated with 3' UTR	0	0	0
UBAC2 (2 of 2)	ENSDART00000144297 UBAC2 (2 of 2) chr1:29528002-29534595 (-)	chr1:29528002-29534595	-	0	Annotated and revised	6	0	2480	chr1:29526037-29528002	Known 3'UTR	32	2	29527920	14	29527976	18	Novel 3'UTR (Extended)	260	4	29525522	18	29525769	59	29526037	176	29526272	7
CU302202.4	ENSDART00000123831 CU302202.4 chr1:58186261-58194968 (+)	chr1:58186261-58194968	+	0	No 3P tags	-	0	0
sfrp2	ENSDART00000102498 sfrp2 chr1:24348723-24353533 (-)	chr1:24348723-24353533	-	2	Only extended	2	297	2241	chr1:24347122-24349020	Novel 3'UTR (Extended)	198	2	24346779	16	24347122	182
ssrp1b	ENSDART00000100268 ssrp1b chr1:45166452-45186546 (+), NM_001099617 LOC100101161 chr1:45188117-45188261 (+), ENSDART00000142187 ssrp1b chr1:45166452-45185845 (+), ENSDART00000003895 ssrp1b chr1:45166452-45185843 (+), ENSDART00000131296 ssrp1b chr1:45166432-45193409 (+)	chr1:45166432-45193409	+	1	Annotated and revised	2	419	2397		Known 3'UTR	7	1	45193480	7	Novel 3'UTR (Extended)	1515	1	45195021	1515
adra2c	ENSDART00000101562 adra2c chr1:41373858-41375231 (-)	chr1:41373858-41375231	-	1	Only extended	2	32	1196	chr1:41372860-41373890	Novel 3'UTR (Extended)	240	2	41372694	18	41372860	222
C3 (4 of 9)	ENSDART00000143793 C3 (4 of 9) chr1:56535324-56571729 (-)	chr1:56535324-56571729	-	0	None associated with 3' UTR	0	0	0
acy3.1;acy3.2	ENSDART00000122217 acy3.2 chr1:52985186-52999743 (-), ENSDART00000052907 acy3.1 chr1:52994074-52999942 (-), ENSDART00000136469 acy3.2 chr1:52987266-52992497 (-), ENSDART00000139600 acy3.2 chr1:52984875-52987227 (-), ENSDART00000004233 acy3.2 chr1:52984624-52992606 (-)	chr1:52984624-52999942	-	3	Annotated and revised	10	562	2891		Known 3'UTR	290	4	52984722	43	52984784	11	52985143	111	52994076	125	Novel 3'UTR (Extended)	71	5	52982295	6	52982438	37	52982967	12	52983042	9	52984127	7	Novel 3'UTR (Shortened)	7	1	52985045	7
C1H19orf53	ENSDART00000083572 C1H19orf53 chr1:55546681-55548292 (-)	chr1:55546681-55548292	-	1	Annotated and revised	5	1044	1039	chr1:55547567-55547725	Known 3'UTR	23	1	55546686	23	Novel 3'UTR (Shortened)	388	4	55547018	16	55547034	17	55547272	19	55547567	336
mdh1a	ENSDART00000012842 mdh1a chr1:51486407-51500202 (+), ENSDART00000022290 mdh1a chr1:51486296-51500208 (+), ENSDART00000140657 mdh1a chr1:51496856-51497496 (+), ENSDART00000140982 mdh1a chr1:51486397-51487319 (+)	chr1:51486296-51500208	+	3	Only annotated	4	308	307		Known 3'UTR	8114	4	51500163	8	51500178	20	51500188	643	51500207	7443
cplx2l	ENSDART00000108526 cplx2l chr1:11559451-11562466 (-), ENSDART00000137463 cplx2l chr1:11559350-11574450 (-), ENSDART00000142122 cplx2l chr1:11559350-11574893 (-), ENSDART00000139336 cplx2l chr1:11559350-11574427 (-), ENSDART00000003825 cplx2l chr1:11559450-11574952 (-)	chr1:11559350-11574952	-	2	Only annotated	3	949	949	chr1:11559350-11560299	Known 3'UTR	7054	3	11559350	3937	11559431	42	11559451	3075
RUNX1 (1 of 2)	ENSDART00000130697 RUNX1 (1 of 2) chr1:1088739-1093175 (-)	chr1:1088739-1093175	-	0	No 3P tags	-	0	0
CU550714.1	ENSDART00000074839 CU550714.1 chr1:41133786-41134998 (+)	chr1:41133786-41134998	+	0	None associated with 3' UTR	0	0	0
ednra	NM_001104844 ednr chr1:36382926-36409211 (+), ENSDART00000128557 ednra chr1:36373669-36382810 (+), ENSDART00000010632 ednra chr1:36373716-36410470 (+)	chr1:36373669-36410470	+	1	Annotated and revised	3	1149	2271		Known 3'UTR	343	2	36410460	222	36410567	121	Novel 3'UTR (Extended)	7	1	36411482	7
si:ch211-217k17.9	ENSDART00000143225 si:ch211-217k17.9 chr1:52892867-52895323 (+)	chr1:52892867-52895323	+	1	Only annotated	3	430	430	chr1:52894893-52895323	Known 3'UTR	4299	3	52895274	536	52895323	3708	52895333	55
TTYH3 (2 of 2)	ENSDART00000131116 TTYH3 (2 of 2) chr1:10962800-11030729 (-), ENSDART00000033361 TTYH3 (2 of 2) chr1:10962666-11031476 (-)	chr1:10962666-11031476	-	2	Annotated and revised	8	4220	4505	chr1:10962668-10966886	Known 3'UTR	3928	3	10962641	140	10962668	2805	10962800	983	Novel 3'UTR (Extended)	222	3	10962369	7	10962381	110	10962411	105	Novel 3'UTR (Shortened)	329	1	10963443	329	Novel 3'UTR (Alternative last exon)	99	1	10974052	99
CHST12 (2 of 7)	ENSDART00000115316 CHST12 (2 of 7) chr1:10917509-10918718 (+), ENSDART00000140329 CHST12 (2 of 7) chr1:10917542-10918718 (+)	chr1:10917509-10918718	+	0	Only extended	1	0	144	chr1:10918718-10918862	Novel 3'UTR (Extended)	26	1	10918862	26
INPP4B	ENSDART00000108492 INPP4B chr1:53556807-53720579 (+), ENSDART00000147683 INPP4B chr1:53424875-53720812 (+)	chr1:53424875-53720812	+	1	Only extended	6	233	2602	chr1:53720579-53723027	Novel 3'UTR (Extended)	109	6	53722617	5	53722706	8	53723027	63	53723082	10	53723108	5	53723181	18
GTF3C1	ENSDART00000124264 GTF3C1 chr1:60221102-60228551 (-), NM_202770 AT4G01985 chr1:60127092-60226892 (-)	chr1:60127092-60228551	-	0	Only extended	1	0	197	chr1:60220905-60221102	Novel 3'UTR (Extended)	57	1	60220905	57
IRS2	NM_001095193 irs2 chr1:28142405-28145120 (+), ENSDART00000053924 IRS2 chr1:28142181-28159035 (+)	chr1:28142181-28159035	+	1	Only revised	3	936	2008	chr1:28158099-28160107	Novel 3'UTR (Extended)	402	1	28160107	402	Novel 3'UTR (Shortened)	21	2	28158545	9	28158609	12
si:dkey-162b23.4	NM_178877 Nhedc2 chr1:44081987-44091034 (-), ENSDART00000074600 si:dkey-162b23.4 chr1:44077552-44094640 (-)	chr1:44077552-44094640	-	1	Annotated and revised	6	502	3817	chr1:44074881-44078054	Known 3'UTR	28	1	44077634	28	Novel 3'UTR (Extended)	827	5	44074318	122	44074871	106	44074881	570	44075416	23	44077363	6
dhrsx	ENSDART00000110026 dhrsx chr1:33067093-33151186 (+), ENSDART00000149786 dhrsx chr1:33067025-33151184 (+), ENSDART00000139004 dhrsx chr1:33055537-33069347 (+), ENSDART00000148946 dhrsx chr1:33067081-33133644 (+), ENSDART00000150043 dhrsx chr1:33049222-33151184 (+)	chr1:33049222-33151186	+	1	Annotated and revised	4	1864	1669		Known 3'UTR	304	1	33151186	304	Novel 3'UTR (Shortened)	55	3	33150259	8	33150557	38	33150892	9
slc27a1b	ENSDART00000121642 slc27a1b chr1:59228421-59245724 (+), ENSDART00000108769 slc27a1b chr1:59228424-59245724 (+), ENSDART00000067775 slc27a1b chr1:59230273-59244744 (+)	chr1:59228421-59245724	+	1	Only Novel 3'UTR (Shortened)	4	1165	966		Novel 3'UTR (Shortened)	398	4	59245062	58	59245073	305	59245147	26	59245525	9
si:dkey-222h21.9	ENSDART00000132423 si:dkey-222h21.9 chr1:58914911-58920765 (+)	chr1:58914911-58920765	+	0	None associated with 3' UTR	0	0	0
CABZ01049362.2	ENSDART00000133693 CABZ01049362.2 chr1:57328803-57333153 (+)	chr1:57328803-57333153	+	0	No 3P tags	-	0	0
KDM4C	NM_001146695 KDM4C chr1:20772974-20794469 (+), ENSDART00000087729 KDM4C chr1:20772167-20806880 (+)	chr1:20772167-20806880	+	1	Annotated and revised	6	478	3056	chr1:20806402-20806879	Known 3'UTR	136	2	20806867	6	20806879	130	Novel 3'UTR (Alternative last exon)	87	4	20787275	27	20787341	40	20787625	10	20787675	10
arl6	ENSDART00000046094 arl6 chr1:33836538-33866619 (+), ENSDART00000123118 arl6 chr1:33857936-33866618 (+)	chr1:33836538-33866619	+	1	Annotated and revised	8	1700	1885	chr1:33864919-33866618	Known 3'UTR	952	1	33866618	952	Novel 3'UTR (Extended)	147	2	33866727	14	33866804	133	Novel 3'UTR (Shortened)	630	4	33865076	454	33865087	79	33865251	8	33865285	89	Novel 3'UTR (Alternative last exon)	18	1	33858262	18
rbpja	ENSDART00000005067 rbpja chr1:13339434-13348758 (+), NM_001090878 rbpj chr1:13339437-13345646 (+)	chr1:13339434-13348758	+	2	Annotated and revised	7	3614	3614	chr1:13345144-13348758	Known 3'UTR	2134	1	13348758	2134	Novel 3'UTR (Shortened)	144	6	13345758	33	13345927	28	13345950	22	13345991	39	13346079	17	13346178	5
zic2b	NM_001087724 zic2-a chr1:28803550-28805363 (+), ENSDART00000054066 zic2b chr1:28803271-28806135 (+)	chr1:28803271-28806135	+	1	Annotated and revised	4	685	891	chr1:28805450-28806254	Known 3'UTR	105	1	28806132	105	Novel 3'UTR (Extended)	3095	1	28806254	3095	Novel 3'UTR (Shortened)	85	2	28805502	13	28805564	72
polr1e	ENSDART00000054574 polr1e chr1:18379206-18390122 (-)	chr1:18379206-18390122	-	1	Only annotated	2	122	119	chr1:18379209-18379328	Known 3'UTR	1999	2	18379196	23	18379209	1976
GPR183 (2 of 3)	ENSDART00000112778 GPR183 (2 of 3) chr1:29541326-29542427 (+), ENSDART00000148342 GPR183 (2 of 3) chr1:29539772-29543235 (+)	chr1:29539772-29543235	+	1	No 3P tags	-	808	808
si:dkey-117m1.4	ENSDART00000136990 si:dkey-117m1.4 chr1:40449929-40479496 (-)	chr1:40449929-40479496	-	1	Annotated and revised	6	198	2962	chr1:40447509-40450127	Known 3'UTR	94	2	40449881	80	40449965	14	Novel 3'UTR (Extended)	1147	4	40447165	60	40447442	4	40447493	124	40447509	959
pnpla4	ENSDART00000112639 pnpla4 chr1:31551150-31565854 (-), ENSDART00000101958 pnpla4 chr1:31555055-31565896 (-)	chr1:31551150-31565896	-	2	Annotated and revised	10	324	2660		Known 3'UTR	5	1	31551153	5	Novel 3'UTR (Extended)	265	9	31548814	28	31548967	10	31548982	9	31549408	13	31550447	137	31550461	46	31550617	13	31550660	4	31550981	5
zgc:174320	ENSDART00000110898 zgc:174320 chr1:32450728-32452453 (+)	chr1:32450728-32452453	+	0	No 3P tags	-	0	0
ugdh	ENSDART00000122648 ugdh chr1:22058231-22067355 (-), ENSDART00000013263 ugdh chr1:22057625-22068847 (-)	chr1:22057625-22068847	-	2	Annotated and revised	5	632	634	chr1:22057623-22058257	Known 3'UTR	22	3	22057623	11	22057658	7	22057717	4	Novel 3'UTR (Shortened)	16	2	22057837	14	22057854	2
akap8l	ENSDART00000126152 akap8l chr1:60320253-60332019 (+)	chr1:60320253-60332019	+	0	None associated with 3' UTR	0	0	0
si:ch73-343l4.2	ENSDART00000113302 si:ch73-343l4.2 chr1:56397189-56400341 (+), ENSDART00000142371 si:ch73-343l4.2 chr1:56397151-56400642 (+)	chr1:56397151-56400642	+	1	Only annotated	1	301	300	chr1:56400341-56400641	Known 3'UTR	29	1	56400641	29
CABZ01084613.2	ENSDART00000123441 CABZ01084613.2 chr1:59489942-59514625 (+), NM_001170404 Zfp157 chr1:59436708-59514073 (+)	chr1:59436708-59514625	+	0	Only extended	3	0	1118	chr1:59514625-59514967	Novel 3'UTR (Extended)	156	3	59514967	121	59515181	4	59515191	31
chst10	ENSDART00000149785 chst10 chr1:27013574-27027864 (+), ENSDART00000149479 chst10 chr1:27013620-27018338 (+), ENSDART00000047211 chst10 chr1:27013563-27028673 (+), ENSDART00000149817 chst10 chr1:27013619-27018081 (+)	chr1:27013563-27028673	+	1	Annotated and revised	7	450	977		Known 3'UTR	1460	2	27018409	10	27028633	1450	Novel 3'UTR (Extended)	129	4	27018454	12	27028810	5	27028841	89	27028862	23	Novel 3'UTR (Shortened)	8	1	27028551	8
aftpha	ENSDART00000100630 aftpha chr1:55638314-55648921 (+), ENSDART00000127068 aftpha chr1:55638590-55648921 (+), ENSDART00000100631 aftpha chr1:55634641-55639484 (+), ENSDART00000132727 aftpha chr1:55634641-55649200 (+)	chr1:55634641-55649200	+	1	Only extended	5	279	6102		Novel 3'UTR (Extended)	40	5	55645586	7	55649904	4	55650232	7	55650251	6	55650325	16
zgc:171470	ENSDART00000080600 zgc:171470 chr1:58006903-58010244 (-)	chr1:58006903-58010244	-	1	Annotated and revised	2	551	543	chr1:58007436-58007454	Known 3'UTR	4	1	58006911	4	Novel 3'UTR (Shortened)	5	1	58007436	5
BX511256.2	NM_002589 PCDH7 chr1:13865638-13869317 (+), ENSDART00000111475 BX511256.2 chr1:13865539-13927467 (+)	chr1:13865539-13927467	+	0	Only extended	1	0	2451	chr1:13927467-13929918	Novel 3'UTR (Extended)	1148	1	13929918	1148
CABZ01067150.2	ENSDART00000122386 CABZ01067150.2 chr1:54685556-54688427 (-)	chr1:54685556-54688427	-	0	No 3P tags	-	0	0
FRMPD1 (1 of 6)	ENSDART00000139937 FRMPD1 (1 of 6) chr1:20739921-20744575 (-), ENSDART00000140553 FRMPD1 (1 of 6) chr1:20728255-20736556 (-), ENSDART00000114719 FRMPD1 (1 of 6) chr1:20717266-20744575 (-)	chr1:20717266-20744575	-	1	Annotated and revised	3	1249	1251		Known 3'UTR	62	1	20717264	62	Novel 3'UTR (Shortened)	9	2	20717902	4	20717998	5
METTL21C (1 of 2)	ENSDART00000114831 METTL21C (1 of 2) chr1:318470-332177 (-), NM_001010977 METTL21C chr1:321019-321912 (-), NM_001010977 METTL21C chr1:324748-331286 (-)	chr1:318470-332177	-	1	Annotated and revised	3	2207	2208	chr1:318469-320677	Known 3'UTR	20	1	318469	20	Novel 3'UTR (Shortened)	12	2	318677	5	318724	7
prss12	ENSDART00000088653 prss12 chr1:18813342-18876795 (+), ENSDART00000140263 prss12 chr1:18822536-18879992 (+)	chr1:18813342-18879992	+	1	Annotated and revised	7	3197	3667	chr1:18876795-18880462	Known 3'UTR	66	3	18879912	6	18879956	14	18879968	46	Novel 3'UTR (Extended)	462	4	18880352	15	18880362	12	18880443	51	18880462	384
TACR3 (1 of 3)	ENSDART00000003278 TACR3 (1 of 3) chr1:53012838-53030493 (+), ENSDART00000132494 TACR3 (1 of 3) chr1:53012838-53030293 (+)	chr1:53012838-53030493	+	0	Annotated and revised	4	0	2991		Known 3'UTR	75	1	53030534	75	Novel 3'UTR (Extended)	172	3	53032948	8	53033414	13	53033450	151
si:dkey-40h17.4	ENSDART00000130356 si:dkey-40h17.4 chr1:23162515-23166530 (+)	chr1:23162515-23166530	+	1	Only annotated	3	46	23	chr1:23166484-23166507	Known 3'UTR	97	3	23166490	34	23166507	57	23166530	6
acta1a	ENSDART00000052838 acta1a chr1:54512687-54520286 (+)	chr1:54512687-54520286	+	1	Annotated and revised	5	350	815	chr1:54519936-54520283	Known 3'UTR	1885	1	54520283	1885	Novel 3'UTR (Extended)	123	4	54520446	15	54520487	27	54520751	71	54520768	10
si:ch211-114l13.10	ENSDART00000144276 si:ch211-114l13.10 chr1:58655442-58656398 (+)	chr1:58655442-58656398	+	0	No 3P tags	-	0	0
rdh8l	ENSDART00000005116 rdh8l chr1:60269730-60279318 (+), NM_001047132 HSD17B1 chr1:60269827-60274134 (+)	chr1:60269730-60279318	+	1	Annotated and revised	2	1058	1056	chr1:60278260-60279316	Known 3'UTR	24	1	60279316	24	Novel 3'UTR (Shortened)	15	1	60278774	15
CABZ01021532.1	ENSDART00000126992 CABZ01021532.1 chr1:53239950-53240595 (+)	chr1:53239950-53240595	+	0	Only extended	1	0	232	chr1:53240595-53240827	Novel 3'UTR (Extended)	34	1	53240827	34
CLDND1 (2 of 2)	ENSDART00000074231 CLDND1 (2 of 2) chr1:52975994-52981658 (+)	chr1:52975994-52981658	+	1	Only extended	3	804	3958	chr1:52980854-52984812	Novel 3'UTR (Extended)	61	3	52984280	7	52984482	15	52984812	39
GPR78 (2 of 2)	NM_138841 Gpr26 chr1:41175886-41177907 (+), ENSDART00000111656 GPR78 (2 of 2) chr1:41175366-41178331 (+)	chr1:41175366-41178331	+	1	Only annotated	2	331	359	chr1:41178000-41178302	Known 3'UTR	642	2	41178302	605	41178359	37
si:ch73-341p18.6	ENSDART00000146614 si:ch73-341p18.6 chr1:56265581-56267665 (+)	chr1:56265581-56267665	+	0	None associated with 3' UTR	0	0	0
aip	ENSDART00000101617 aip chr1:40357601-40401966 (+), ENSDART00000016877 aip chr1:40389193-40401983 (+), NM_001140060 aip chr1:40357598-40371550 (+)	chr1:40357598-40401983	+	1	Annotated and revised	15	688	690	chr1:40401295-40401985	Known 3'UTR	796	6	40401881	7	40401925	22	40401935	134	40401985	613	40402006	13	40402034	7	Novel 3'UTR (Extended)	66	5	40371814	4	40371945	9	40371974	42	40372021	7	40372035	4	Novel 3'UTR (Shortened)	193	4	40401584	20	40401617	39	40401684	127	40401781	7
mtmr7b	NM_001075641 MTMR7 chr1:15229566-15249458 (-), ENSDART00000127370 mtmr7b chr1:15226107-15249679 (-)	chr1:15226107-15249679	-	1	Annotated and revised	5	463	2502	chr1:15224821-15226570	Known 3'UTR	36	1	15226107	36	Novel 3'UTR (Extended)	1870	4	15224170	6	15224821	1845	15224842	9	15225577	10
NDUFAB1 (2 of 2)	ENSDART00000081337 NDUFAB1 (2 of 2) chr1:8194183-8199549 (-)	chr1:8194183-8199549	-	1	Annotated and revised	5	256	250	chr1:8194189-8194532	Known 3'UTR	4028	4	8194179	99	8194189	3918	8194211	7	8194228	4	Novel 3'UTR (Shortened)	9	1	8194314	9
gucy1a3	ENSDART00000102455 gucy1a3 chr1:24641200-24656451 (+), ENSDART00000016936 gucy1a3 chr1:24641200-24650104 (+)	chr1:24641200-24656451	+	2	Only annotated	1	530	528		Known 3'UTR	1434	1	24656449	1434
smad1	ENSDART00000033566 smad1 chr1:35605158-35637057 (-), ENSDART00000125043 smad1 chr1:35605159-35637026 (-)	chr1:35605158-35637057	-	1	Annotated and revised	4	1373	1596	chr1:35605159-35606531	Known 3'UTR	621	1	35605159	621	Novel 3'UTR (Extended)	41	2	35604935	32	35604950	9	Novel 3'UTR (Shortened)	92	1	35605297	92
lrrtm1	ENSDART00000074618 lrrtm1 chr1:43159461-43161030 (-), ENSDART00000133917 lrrtm1 chr1:43159072-43161595 (-)	chr1:43159072-43161595	-	1	Only extended	4	389	2156	chr1:43157305-43159461	Novel 3'UTR (Extended)	626	4	43157305	511	43157568	74	43158567	6	43158915	35
dla	ENSDART00000012104 dla chr1:54580210-54592934 (+), ENSDART00000126339 dla chr1:54580218-54591983 (+), ENSDART00000006180 dla chr1:54580218-54591983 (+)	chr1:54580210-54592934	+	2	Only annotated	1	1260	1256		Known 3'UTR	1233	1	54592930	1233
mtap	ENSDART00000054208 mtap chr1:24993572-25010532 (+), NM_001160570 mtap chr1:25001891-25002535 (+), NM_063228 B0228.7 chr1:25006349-25006520 (+)	chr1:24993572-25010532	+	1	Annotated and revised	5	356	1472	chr1:25010176-25010549	Known 3'UTR	325	2	25010525	10	25010549	315	Novel 3'UTR (Extended)	9	1	25007992	9	Novel 3'UTR (Shortened)	16	2	25010349	9	25010359	7
atp1a1a.4	ENSDART00000048828 atp1a1a.4 chr1:1446560-1462945 (+), NM_001089111 atp1a1-b chr1:1446854-1462675 (+)	chr1:1446560-1462945	+	1	Only annotated	1	96	95	chr1:1462849-1462944	Known 3'UTR	2795	1	1462944	2795
CREG1	NM_003851 CREG1 chr1:776419-778429 (+), ENSDART00000092502 CREG1 chr1:776250-780068 (+)	chr1:776250-780068	+	1	Only annotated	1	421	423	chr1:779600-780070	Known 3'UTR	1365	1	780070	1365
gstcd	ENSDART00000124185 gstcd chr1:50458789-50468274 (+), ENSDART00000053016 gstcd chr1:50458819-50572679 (+), ENSDART00000134661 gstcd chr1:50458790-50572686 (+), ENSDART00000006394 gstcd chr1:50462996-50572679 (+), ENSDART00000133255 gstcd chr1:50458789-50468278 (+)	chr1:50458789-50572686	+	2	Annotated and revised	5	280	271		Known 3'UTR	633	3	50468269	203	50468280	6	50572684	424	Novel 3'UTR (Shortened)	31	2	50572493	5	50572570	26
AL929150.2	ENSDART00000037250 AL929150.2 chr1:55542026-55546724 (+), NM_001113017 RGS16 chr1:55544944-55545041 (+)	chr1:55542026-55546724	+	1	Only annotated	2	106	109	chr1:55546618-55546727	Known 3'UTR	175	2	55546713	9	55546727	166
jag1a	ENSDART00000137172 jag1a chr1:51614687-51667364 (-), ENSDART00000047851 jag1a chr1:51614689-51667364 (-), ENSDART00000123632 jag1a chr1:51615149-51667295 (-)	chr1:51614687-51667364	-	2	Annotated and revised	4	2710	2708	chr1:51614689-51617397	Known 3'UTR	252	2	51614689	240	51614708	12	Novel 3'UTR (Shortened)	15	2	51616682	10	51617034	5
micall2b	ENSDART00000140660 micall2b chr1:8551461-8562164 (-), ENSDART00000008682 micall2b chr1:8536099-8562164 (-), ENSDART00000144158 micall2b chr1:8553648-8562205 (-), ENSDART00000137821 micall2b chr1:8536102-8553760 (-), ENSDART00000134369 micall2b chr1:8551483-8562164 (-)	chr1:8536099-8562205	-	3	Annotated and revised	5	1769	1764		Known 3'UTR	1063	1	8536104	1063	Novel 3'UTR (Extended)	4	1	8550429	4	Novel 3'UTR (Shortened)	38	3	8536202	24	8536318	4	8546060	10
anxa5b	ENSDART00000019698 anxa5b chr1:21428977-21439189 (+)	chr1:21428977-21439189	+	1	Annotated and revised	6	805	805	chr1:21438384-21439189	Known 3'UTR	1550	4	21439175	15	21439189	877	21439206	119	21439221	539	Novel 3'UTR (Shortened)	16	2	21438821	8	21438931	8
si:ch211-214c7.4	ENSDART00000149116 si:ch211-214c7.4 chr1:46210875-46215547 (+), ENSDART00000101413 si:ch211-214c7.4 chr1:46198523-46215393 (+), ENSDART00000143363 si:ch211-214c7.4 chr1:46177911-46215547 (+)	chr1:46177911-46215547	+	2	Annotated and revised	4	3643	3647		Known 3'UTR	810	1	46215397	810	Novel 3'UTR (Alternative last exon)	978	3	46209596	8	46209619	24	46209857	946
BX927130.1	ENSDART00000122490 BX927130.1 chr1:37484563-37485703 (-)	chr1:37484563-37485703	-	0	No 3P tags	-	0	0
fam184b	ENSDART00000077394 fam184b chr1:22281184-22331792 (-), ENSDART00000145942 fam184b chr1:22280618-22331971 (-)	chr1:22280618-22331971	-	1	Only annotated	2	566	570	chr1:22280614-22281184	Known 3'UTR	650	2	22280614	639	22280691	11
hmx1	NM_001085757 hmx3 chr1:41294115-41294370 (-), ENSDART00000113087 hmx1 chr1:41293584-41295724 (-)	chr1:41293584-41295724	-	1	Annotated and revised	3	381	378	chr1:41293587-41293965	Known 3'UTR	69	2	41293587	64	41293670	5	Novel 3'UTR (Shortened)	10	1	41293695	10
elfn1	ENSDART00000111131 elfn1 chr1:8784917-8787329 (+)	chr1:8784917-8787329	+	0	Only extended	6	0	4421	chr1:8787329-8791537	Novel 3'UTR (Extended)	243	6	8787614	40	8788056	4	8788827	9	8791537	179	8791560	6	8791750	5
prkag3	ENSDART00000126468 prkag3 chr1:5035471-5049178 (+), ENSDART00000024358 prkag3 chr1:5035244-5046178 (+)	chr1:5035244-5049178	+	2	Only annotated	1	374	376		Known 3'UTR	331	1	5049180	331
npy1r	ENSDART00000142109 npy1r chr1:20025481-20080394 (-), ENSDART00000054444 npy1r chr1:20025481-20070028 (-)	chr1:20025481-20080394	-	0	None associated with 3' UTR	0	0	0
FBXO41	ENSDART00000113650 FBXO41 chr1:42072921-42137659 (+), ENSDART00000145789 FBXO41 chr1:42049130-42138019 (+)	chr1:42049130-42138019	+	1	Annotated and revised	2	360	5834	chr1:42137659-42143493	Known 3'UTR	11	1	42138013	11	Novel 3'UTR (Extended)	535	1	42143493	535
APLF	ENSDART00000129213 APLF chr1:52126310-52147697 (+)	chr1:52126310-52147697	+	1	Annotated and revised	9	2691	2696	chr1:52145006-52147702	Known 3'UTR	585	1	52147702	585	Novel 3'UTR (Shortened)	254	8	52145814	58	52146281	28	52146342	10	52146740	62	52146783	16	52146807	14	52147316	9	52147484	57
si:dkey-22i16.3	ENSDART00000132089 si:dkey-22i16.3 chr1:44284485-44287783 (-), ENSDART00000135477 si:dkey-22i16.3 chr1:44284582-44287772 (-)	chr1:44284485-44287783	-	2	Only annotated	2	387	385	chr1:44284487-44284872	Known 3'UTR	595	2	44284487	555	44284558	40
spry2	ENSDART00000052423 spry2 chr1:4171020-4174337 (+)	chr1:4171020-4174337	+	1	Annotated and revised	5	179	857	chr1:4174158-4175015	Known 3'UTR	14	2	4174289	5	4174308	9	Novel 3'UTR (Extended)	987	3	4174494	19	4175015	929	4175037	39
CABZ01058865.3	ENSDART00000125679 CABZ01058865.3 chr1:58130027-58138626 (-)	chr1:58130027-58138626	-	0	No 3P tags	-	0	0
si:dkey-222h21.8	ENSDART00000142736 si:dkey-222h21.8 chr1:58949816-58954576 (+), ENSDART00000110453 si:dkey-222h21.8 chr1:58947305-58950583 (+)	chr1:58947305-58954576	+	0	Only extended	1	0	304		Novel 3'UTR (Extended)	7	1	58954880	7
MFAP4 (9 of 12)	NM_001141245 mfap4 chr1:59825824-59826415 (+), ENSDART00000100195 MFAP4 (9 of 12) chr1:59825824-59826517 (+)	chr1:59825824-59826517	+	0	Only extended	3	0	627	chr1:59826517-59827042	Novel 3'UTR (Extended)	56	3	59826805	12	59827031	13	59827042	31
si:ch211-114l13.3	ENSDART00000144190 si:ch211-114l13.3 chr1:58771717-58772381 (+)	chr1:58771717-58772381	+	0	None associated with 3' UTR	0	0	0
SH3D19 (1 of 2)	ENSDART00000122220 SH3D19 (1 of 2) chr1:23267188-23320192 (-)	chr1:23267188-23320192	-	1	Annotated and revised	5	149	347	chr1:23267186-23267337	Known 3'UTR	850	3	23267186	840	23267210	4	23267227	6	Novel 3'UTR (Extended)	145	2	23266990	38	23267042	107
AL954695.1	ENSDART00000075814 AL954695.1 chr1:25539503-25540660 (-)	chr1:25539503-25540660	-	0	None associated with 3' UTR	0	0	0
il8	NM_001124362 LOC100136039 chr1:13138190-13138497 (+), ENSDART00000140139 il8 chr1:13137909-13138866 (+)	chr1:13137909-13138866	+	1	Only annotated	1	221	221	chr1:13138645-13138866	Known 3'UTR	70	1	13138866	70
CABZ01084615.1	ENSDART00000114576 CABZ01084615.1 chr1:59543536-59550894 (-)	chr1:59543536-59550894	-	0	Only extended	3	0	2793	chr1:59543267-59543536	Novel 3'UTR (Extended)	182	3	59540743	30	59543267	142	59543296	10
FP236452.2	ENSDART00000130654 FP236452.2 chr1:35176367-35177090 (-)	chr1:35176367-35177090	-	0	No 3P tags	-	0	0
vps37a	ENSDART00000078675 vps37a chr1:15204973-15222101 (+)	chr1:15204973-15222101	+	1	Annotated and revised	3	496	4731	chr1:15221510-15222106	Known 3'UTR	2879	1	15222106	2879	Novel 3'UTR (Extended)	14	2	15224133	10	15226241	4
zgc:66472	ENSDART00000138447 zgc:66472 chr1:44371234-44383531 (-), ENSDART00000134932 zgc:66472 chr1:44371234-44383460 (-), ENSDART00000109334 zgc:66472 chr1:44372013-44380995 (-)	chr1:44371234-44383531	-	1	Annotated and revised	3	779	780	chr1:44371233-44372013	Known 3'UTR	4174	2	44371233	3884	44371314	290	Novel 3'UTR (Shortened)	40	1	44371499	40
PELI1 (2 of 2)	ENSDART00000125878 PELI1 (2 of 2) chr1:55588234-55598025 (-)	chr1:55588234-55598025	-	0	Only extended	6	0	3385	chr1:55585522-55588234	Novel 3'UTR (Extended)	175	6	55584849	51	55584905	6	55585331	4	55585507	6	55585522	55	55588130	53
ctnna2	ENSDART00000101311 ctnna2 chr1:42607579-42774043 (+), ENSDART00000143871 ctnna2 chr1:42728051-42773740 (+), ENSDART00000138740 ctnna2 chr1:42607579-43265577 (+), ENSDART00000101306 ctnna2 chr1:42607715-43418249 (+), ENSDART00000017139 ctnna2 chr1:42607579-42857497 (+), ENSDART00000110860 ctnna2 chr1:42662235-43042727 (+)	chr1:42607579-43418249	+	1	Only annotated	1	650	650		Known 3'UTR	2512	1	43418249	2512
si:dkey-56e3.2	ENSDART00000139175 si:dkey-56e3.2 chr1:41970689-41975966 (+)	chr1:41970689-41975966	+	1	Only annotated	1	450	448	chr1:41975516-41975964	Known 3'UTR	76	1	41975964	76
BX908759.6	ENSDART00000124100 BX908759.6 chr1:57834233-57840136 (-)	chr1:57834233-57840136	-	0	No 3P tags	-	0	0
tmem144a	ENSDART00000054440 tmem144a chr1:20095810-20104128 (-)	chr1:20095810-20104128	-	2	Annotated and revised	5	849	798	chr1:20095861-20096659	Known 3'UTR	115	2	20095842	16	20095861	99	Novel 3'UTR (Shortened)	21	3	20095989	13	20096248	4	20096455	4
lratb	ENSDART00000131090 lratb chr1:9250793-9289291 (+), ENSDART00000080576 lratb chr1:9286304-9289291 (+)	chr1:9250793-9289291	+	1	Only annotated	2	256	256	chr1:9289035-9289291	Known 3'UTR	1604	2	9289291	1600	9289301	4
dcun1d2	ENSDART00000060971 dcun1d2 chr1:82874-89602 (-)	chr1:82874-89602	-	1	Annotated and revised	4	691	1203	chr1:84117-84953	Known 3'UTR	4	1	82913	4	Novel 3'UTR (Extended)	4	1	82362	4	Novel 3'UTR (Shortened)	8	1	83794	8	Novel 3'UTR (Alternative last exon)	9	1	84117	9
appa	ENSDART00000037385 appa chr1:496070-508054 (-), ENSDART00000082039 appa chr1:496709-505038 (-)	chr1:496070-508054	-	0	Only extended	2	0	4213		Novel 3'UTR (Extended)	7474	2	492496	7115	494501	359
SH2D3A	ENSDART00000130415 SH2D3A chr1:59799089-59812722 (-)	chr1:59799089-59812722	-	0	No 3P tags	-	0	0
SPINK4	ENSDART00000126020 SPINK4 chr1:11431512-11434980 (+)	chr1:11431512-11434980	+	1	Annotated and revised	3	57	4301	chr1:11434923-11434980	Known 3'UTR	2336	1	11434980	2336	Novel 3'UTR (Extended)	17	2	11436147	11	11441131	6
atf7ip	ENSDART00000148413 atf7ip chr1:46048362-46085174 (-), ENSDART00000149725 atf7ip chr1:46047421-46085011 (-), ENSDART00000149155 atf7ip chr1:46040751-46055100 (-), ENSDART00000150066 atf7ip chr1:46048363-46086935 (-), ENSDART00000101452 atf7ip chr1:46040756-46055100 (-), ENSDART00000150165 atf7ip chr1:46048362-46087163 (-), ENSDART00000135089 atf7ip chr1:46040751-46051480 (-)	chr1:46040751-46087163	-	1	Annotated and revised	6	508	2876		Known 3'UTR	1001	1	46040756	1001	Novel 3'UTR (Extended)	24	3	46040613	10	46045013	8	46047948	6	Novel 3'UTR (Shortened)	337	2	46040885	274	46040898	63
RAPGEF2 (2 of 2)	ENSDART00000146630 RAPGEF2 (2 of 2) chr1:19921465-19948417 (-), ENSDART00000141077 RAPGEF2 (2 of 2) chr1:19921465-19986760 (-), ENSDART00000087670 RAPGEF2 (2 of 2) chr1:19924164-19961060 (-)	chr1:19921465-19986760	-	1	Only extended	1	637	1029		Novel 3'UTR (Extended)	1903	1	19921073	1903
BX470266.1	ENSDART00000011186 BX470266.1 chr1:7031126-7038714 (-)	chr1:7031126-7038714	-	0	No 3P tags	-	0	0
cars2	NM_024537 CARS2 chr1:28114966-28126850 (+), ENSDART00000113735 cars2 chr1:28114603-28133331 (+)	chr1:28114603-28133331	+	1	Annotated and revised	6	295	6694	chr1:28133036-28133177	Known 3'UTR	19	1	28133342	19	Novel 3'UTR (Extended)	107	3	28128599	13	28133434	88	28133544	6	Novel 3'UTR (Shortened)	933	2	28133177	918	28133190	15
pdia2	ENSDART00000130181 pdia2 chr1:9030610-9040716 (+), ENSDART00000005895 pdia2 chr1:9030572-9040849 (+)	chr1:9030572-9040849	+	1	Only extended	2	133	620	chr1:9040716-9041336	Novel 3'UTR (Extended)	18	2	9041138	8	9041336	10
irf2a	ENSDART00000130270 irf2a chr1:40228280-40232702 (+), ENSDART00000149984 irf2a chr1:40222309-40232170 (+), ENSDART00000131954 irf2a chr1:40228275-40242717 (+), ENSDART00000024945 irf2a chr1:40228984-40242304 (+)	chr1:40222309-40242717	+	3	Annotated and revised	8	834	1400		Known 3'UTR	617	5	40232613	54	40232645	16	40232663	19	40232702	283	40232742	245	Novel 3'UTR (Extended)	1967	1	40233268	1967	Novel 3'UTR (Shortened)	45	2	40231903	7	40232536	38
gpm6ab	ENSDART00000128794 gpm6ab chr1:39003574-39063985 (-), ENSDART00000148404 gpm6ab chr1:39003574-39111329 (-), ENSDART00000130324 gpm6ab chr1:39003574-39111304 (-), ENSDART00000040280 gpm6ab chr1:39003579-39111304 (-)	chr1:39003574-39111329	-	1	Annotated and revised	3	2609	2607		Known 3'UTR	12549	2	39003576	12545	39003673	4	Novel 3'UTR (Shortened)	42	1	39004023	42
chic2	ENSDART00000030083 chic2 chr1:13290842-13301180 (+)	chr1:13290842-13301182	+	1	Annotated and revised	5	1253	1252	chr1:13299929-13301181	Known 3'UTR	1040	2	13301114	5	13301181	1035	Novel 3'UTR (Shortened)	70	3	13300750	9	13301014	39	13301070	22
2012-09-03	ENSDART00000128383 sept3 chr1:46087336-46102326 (-), ENSDART00000044057 sept3 chr1:46087334-46104648 (-)	chr1:46087334-46104648	-	1	Annotated and revised	4	1161	1159	chr1:46087336-46088495	Known 3'UTR	2660	3	46087336	2541	46087404	18	46087417	101	Novel 3'UTR (Shortened)	8	1	46087742	8
dok7	ENSDART00000135369 dok7 chr1:41523852-41573178 (-), ENSDART00000084665 dok7 chr1:41524565-41573031 (-)	chr1:41523852-41573178	-	1	Only revised	2	713	2090	chr1:41522475-41524565	Novel 3'UTR (Extended)	145	1	41522475	145	Novel 3'UTR (Shortened)	9	1	41524410	9
si:ch211-142c4.1	ENSDART00000132440 si:ch211-142c4.1 chr1:19374956-19388456 (+)	chr1:19374956-19388456	+	1	No 3P tags	-	75	75
CT573492.3	ENSDART00000129804 CT573492.3 chr1:23255866-23258852 (+)	chr1:23255866-23258852	+	0	Only annotated	3	0	43	chr1:23258852-23258895	Known 3'UTR	1470	3	23258858	110	23258875	38	23258895	1322
trim2a	ENSDART00000050445 trim2a chr1:24179844-24227681 (-)	chr1:24179844-24227681	-	2	Only extended	3	643	5698	chr1:24174789-24180487	Novel 3'UTR (Extended)	321	3	24174789	191	24174909	126	24177451	4
TSPAN5 (3 of 3)	ENSDART00000103399 TSPAN5 (3 of 3) chr1:11295393-11312678 (-), NM_001200967 tsn17 chr1:11298883-11312383 (-)	chr1:11295393-11312678	-	1	Only revised	9	985	6118	chr1:11290260-11296378	Novel 3'UTR (Extended)	231	7	11290249	22	11290260	154	11290561	6	11290769	4	11290807	32	11293422	4	11293443	9	Novel 3'UTR (Shortened)	70	2	11296049	64	11296162	6
C1H16orf88	ENSDART00000132785 C1H16orf88 chr1:55223064-55233219 (+), ENSDART00000146677 C1H16orf88 chr1:55227025-55228800 (+), ENSDART00000077578 C1H16orf88 chr1:55224891-55235466 (+)	chr1:55223064-55235466	+	2	Annotated and revised	14	2335	2335		Known 3'UTR	666	5	55233153	312	55233193	12	55233229	9	55235466	321	55235487	12	Novel 3'UTR (Shortened)	154	9	55233356	28	55233620	53	55233685	25	55233727	6	55234208	4	55234230	7	55234301	4	55234983	19	55235073	8
klhl5	ENSDART00000089442 klhl5 chr1:17105727-17188056 (-)	chr1:17105727-17188056	-	1	Only extended	1	145	6208	chr1:17099664-17105872	Novel 3'UTR (Extended)	18	1	17099664	18
ZFP91	ENSDART00000135647 ZFP91 chr1:40509089-40525349 (-), ENSDART00000148234 ZFP91 chr1:40521465-40532942 (-), ENSDART00000146917 ZFP91 chr1:40510200-40516461 (-), ENSDART00000113527 ZFP91 chr1:40509086-40525026 (-)	chr1:40509086-40532942	-	1	Annotated and revised	6	212	6145		Known 3'UTR	1190	1	40509092	1190	Novel 3'UTR (Extended)	159	5	40504055	44	40504078	16	40507074	14	40507361	73	40508923	12
TUSC3	ENSDART00000054707 TUSC3 chr1:14899826-14908864 (-)	chr1:14899826-14908864	-	0	No 3P tags	-	0	0
ndufs8a	ENSDART00000059227 ndufs8a chr1:45269799-45278549 (+)	chr1:45269799-45278549	+	1	Annotated and revised	5	858	855	chr1:45277691-45278546	Known 3'UTR	3006	3	45278519	18	45278529	6	45278546	2982	Novel 3'UTR (Shortened)	62	2	45277888	56	45278142	6
kpnb3	ENSDART00000058876 kpnb3 chr1:2017192-2056339 (+), NM_001037817 RANBP6 chr1:2017226-2035861 (+)	chr1:2017192-2056339	+	1	Annotated and revised	6	921	919	chr1:2055418-2056337	Known 3'UTR	5572	2	2056326	38	2056337	5534	Novel 3'UTR (Shortened)	86	4	2055695	29	2055966	9	2056181	20	2056204	28
DCLK2 (2 of 3)	ENSDART00000046260 DCLK2 (2 of 3) chr1:36837389-36853526 (+)	chr1:36837389-36853526	+	0	No 3P tags	-	0	0
si:dkey-29d5.2	ENSDART00000133553 si:dkey-29d5.2 chr1:26704715-26708219 (-)	chr1:26704715-26708219	-	1	Only annotated	1	334	331	chr1:26704718-26705049	Known 3'UTR	21	1	26704718	21
asna1	ENSDART00000007079 asna1 chr1:52632453-52647919 (+), ENSDART00000074265 asna1 chr1:52632506-52645446 (+)	chr1:52632453-52647919	+	2	Annotated and revised	17	3445	3444		Known 3'UTR	1481	5	52645438	37	52645452	93	52645508	59	52647897	7	52647918	1285	Novel 3'UTR (Shortened)	446	12	52644647	8	52644657	285	52644667	24	52644677	7	52645770	6	52645894	41	52646008	25	52646293	4	52646476	5	52646741	8	52646813	21	52647792	12
MFAP4 (3 of 12)	ENSDART00000013762 MFAP4 (3 of 12) chr1:59741974-59743179 (-)	chr1:59741974-59743179	-	1	Only extended	2	147	300	chr1:59741821-59742121	Novel 3'UTR (Extended)	12545	2	59741821	11870	59741833	675
fgg	ENSDART00000054230 fgg chr1:24527198-24536783 (-), ENSDART00000127889 fgg chr1:24527207-24536739 (-)	chr1:24527198-24536783	-	1	Only annotated	3	663	665		Known 3'UTR	1477	3	24527195	119	24527205	1329	24527304	29
tyrp1b	ENSDART00000078594 tyrp1b chr1:18074731-18087943 (+), NM_000550 TYRP1 chr1:18076916-18083527 (+)	chr1:18074731-18087943	+	1	Only annotated	1	309	309	chr1:18087634-18087943	Known 3'UTR	792	1	18087943	792
lap3	ENSDART00000089025 lap3 chr1:18160274-18173405 (-)	chr1:18160274-18173405	-	1	Annotated and revised	3	416	2193	chr1:18160279-18160690	Known 3'UTR	1244	2	18160264	268	18160279	976	Novel 3'UTR (Extended)	8	1	18158497	8
CABZ01059291.1	ENSDART00000111526 CABZ01059291.1 chr1:59422997-59429026 (-)	chr1:59422997-59429026	-	0	No 3P tags	-	0	0
BX469930.4	ENSDART00000127852 BX469930.4 chr1:58646191-58646654 (+)	chr1:58646191-58646654	+	0	None associated with 3' UTR	0	0	0
FP312971.1	ENSDART00000062422 FP312971.1 chr1:60314808-60320004 (+)	chr1:60314808-60320004	+	1	Only annotated	4	3606	3607	chr1:60316398-60320005	Known 3'UTR	1350	4	60319954	16	60319995	4	60320005	1326	60320028	4
clgn	ENSDART00000101671 clgn chr1:40965274-41000910 (-)	chr1:40965274-41000910	-	1	Annotated and revised	5	887	1421	chr1:40965276-40966161	Known 3'UTR	4055	4	40965211	53	40965231	18	40965276	2291	40965311	1693	Novel 3'UTR (Extended)	19	1	40964740	19
fstl1a	ENSDART00000015046 fstl1a chr1:47956829-47982467 (+), NM_001017950 FSTL1 chr1:47967613-47980577 (+)	chr1:47956829-47982467	+	1	Only annotated	1	477	475	chr1:47981990-47982465	Known 3'UTR	24	1	47982465	24
ERBB4 (2 of 4)	ENSDART00000092114 ERBB4 (2 of 4) chr1:6216169-6280457 (-)	chr1:6216169-6280457	-	0	None associated with 3' UTR	0	0	0
rgs12	ENSDART00000022546 rgs12 chr1:41582557-41668886 (-), ENSDART00000101536 rgs12 chr1:41582557-41668886 (-), ENSDART00000125886 rgs12 chr1:41583740-41668711 (-), ENSDART00000126853 rgs12 chr1:41595624-41668886 (-), ENSDART00000125988 rgs12 chr1:41595624-41668886 (-)	chr1:41582557-41668886	-	2	Only annotated	2	2157	1685		Known 3'UTR	786	2	41595625	771	41595646	15
lef1	ENSDART00000047876 lef1 chr1:50321630-50410566 (+), ENSDART00000132405 lef1 chr1:50321630-50410570 (+)	chr1:50321630-50410570	+	1	Only annotated	1	1288	1290	chr1:50393582-50410572	Known 3'UTR	2121	1	50410572	2121
itga6b	NM_008398 Itga7 chr1:30075528-30119903 (+), ENSDART00000102210 itga6b chr1:30075421-30120963 (+)	chr1:30075421-30120963	+	1	Annotated and revised	4	919	926	chr1:30120044-30120970	Known 3'UTR	166	3	30120914	12	30120946	72	30120970	82	Novel 3'UTR (Shortened)	35	1	30120487	35
btbd3	ENSDART00000132244 btbd3 chr1:51700752-51704521 (+), ENSDART00000014970 btbd3 chr1:51700753-51706762 (+), ENSDART00000132141 btbd3 chr1:51700894-51706165 (+)	chr1:51700752-51706762	+	0	Annotated and revised	9	0	5633		Known 3'UTR	23	1	51704524	23	Novel 3'UTR (Extended)	1136	8	51707305	69	51707327	7	51707337	3	51707476	9	51707586	72	51707827	5	51708287	8	51711798	963
n4bp2	ENSDART00000087658 n4bp2 chr1:22146587-22167909 (+)	chr1:22146587-22167909	+	1	Annotated and revised	13	724	1290	chr1:22167185-22167307	Known 3'UTR	57	2	22167849	42	22167925	15	Novel 3'UTR (Extended)	75	2	22168211	67	22168475	8	Novel 3'UTR (Shortened)	175	9	22167237	12	22167284	15	22167307	61	22167386	13	22167469	15	22167635	37	22167759	6	22167792	12	22167805	4
smox	ENSDART00000053685 smox chr1:42231671-42248506 (+)	chr1:42231671-42248506	+	1	Annotated and revised	7	369	6633	chr1:42248137-42248504	Known 3'UTR	1043	4	42248478	12	42248504	919	42248514	6	42248569	106	Novel 3'UTR (Extended)	58	2	42253818	5	42254770	53	Novel 3'UTR (Shortened)	28	1	42248285	28
si:dkey-179o14.1	ENSDART00000147566 si:dkey-179o14.1 chr1:30853427-30959378 (-), ENSDART00000087115 si:dkey-179o14.1 chr1:30851856-30959116 (-)	chr1:30851856-30959378	-	0	Only extended	1	0	2927		Novel 3'UTR (Extended)	5	1	30848929	5
ENDOD1 (5 of 10)	ENSDART00000110474 ENDOD1 (5 of 10) chr1:7703220-7705493 (-)	chr1:7703220-7705493	-	0	No 3P tags	-	0	0
CENPK	ENSDART00000057886 CENPK chr1:30962711-30970083 (-), ENSDART00000146567 CENPK chr1:30962710-30970084 (-), ENSDART00000139828 CENPK chr1:30963501-30970063 (-)	chr1:30962710-30970084	-	2	Annotated and revised	4	289	636		Known 3'UTR	5116	2	30962709	5023	30962726	93	Novel 3'UTR (Extended)	62	1	30963006	62	Novel 3'UTR (Shortened)	102	1	30962995	102
prkcba	ENSDART00000137211 prkcba chr1:8080835-8120431 (+), ENSDART00000006211 prkcba chr1:8080802-8140996 (+)	chr1:8080802-8140996	+	2	Only extended	4	529	3246		Novel 3'UTR (Extended)	875	4	8143645	91	8143896	607	8143915	49	8144118	128
CD200 (5 of 5)	ENSDART00000077725 CD200 (5 of 5) chr1:34396219-34419640 (+), ENSDART00000113808 CD200 (5 of 5) chr1:34396223-34439740 (+)	chr1:34396219-34439740	+	1	Only extended	3	350	13621		Novel 3'UTR (Extended)	209	3	34440029	61	34440063	22	34440104	126
grtp1a	ENSDART00000045884 grtp1a chr1:62117-66487 (-), NM_001005632 grtp1 chr1:62326-63501 (-)	chr1:62117-66487	-	0	No 3P tags	-	0	0
si:ch211-15j1.2	ENSDART00000139666 si:ch211-15j1.2 chr1:58848922-58849673 (+)	chr1:58848922-58849673	+	0	No 3P tags	-	0	0
CR385050.1	ENSDART00000108821 CR385050.1 chr1:44368915-44370139 (-)	chr1:44368915-44370139	-	0	Only extended	1	0	117	chr1:44368798-44368915	Novel 3'UTR (Extended)	13	1	44368798	13
KCTD15	ENSDART00000045414 KCTD15 chr1:35076911-35117056 (+)	chr1:35076903-35117056	+	0	Only extended	8	0	4611	chr1:35117056-35121667	Novel 3'UTR (Extended)	890	8	35117207	6	35117281	4	35117302	13	35117535	4	35117590	6	35118362	5	35121596	183	35121667	669
si:dkey-79f11.5	ENSDART00000133098 si:dkey-79f11.5 chr1:6914083-6920400 (+), ENSDART00000111461 si:dkey-79f11.5 chr1:6914142-6920405 (+)	chr1:6914083-6920405	+	1	Only annotated	1	456	381	chr1:6919944-6920405	Known 3'UTR	56	1	6920405	56
clta	ENSDART00000138759 clta chr1:11644362-11657751 (+), ENSDART00000144920 clta chr1:11644343-11657548 (+), ENSDART00000067082 clta chr1:11644362-11658061 (+)	chr1:11644343-11658061	+	3	Annotated and revised	2	542	540	chr1:11657519-11658059	Known 3'UTR	22624	1	11658059	22624	Novel 3'UTR (Shortened)	85	1	11657938	85
runx1	ENSDART00000055968 runx1 chr1:1063376-1075836 (+)	chr1:1063376-1075842	+	1	None associated with 3' UTR	0	6	0
pcdh18a	ENSDART00000127838 pcdh18a chr1:12145909-12155872 (-)	chr1:12145909-12155872	-	2	Only annotated	1	613	613	chr1:12145909-12146522	Known 3'UTR	791	1	12145909	791
GSG2	ENSDART00000134576 GSG2 chr1:22263362-22280628 (+)	chr1:22263362-22280628	+	1	Annotated and revised	6	142	3313	chr1:22280486-22281540	Known 3'UTR	31	2	22280608	27	22280641	4	Novel 3'UTR (Extended)	91	4	22280807	10	22281540	53	22281766	24	22283799	4
si:ch211-202h22.7	ENSDART00000109919 si:ch211-202h22.7 chr1:55194832-55199216 (+), ENSDART00000141207 si:ch211-202h22.7 chr1:55189457-55199333 (+)	chr1:55189457-55199333	+	1	Only extended	2	117	2262	chr1:55199216-55201647	Novel 3'UTR (Extended)	32	2	55201647	24	55201663	8
PAIP2B	ENSDART00000122333 PAIP2B chr1:41846834-41852592 (+), ENSDART00000010211 PAIP2B chr1:41846742-41853059 (+), ENSDART00000135280 PAIP2B chr1:41846982-41852177 (+)	chr1:41846742-41853059	+	3	Annotated and revised	9	1118	1112		Known 3'UTR	1097	6	41852546	20	41852581	19	41852592	999	41852609	28	41853053	25	41853065	6	Novel 3'UTR (Shortened)	54	3	41852386	38	41852397	6	41852438	10
topors	ENSDART00000121658 topors chr1:24989280-24992076 (+), ENSDART00000127154 topors chr1:24989232-24990801 (+), ENSDART00000141661 topors chr1:24987747-24989695 (+), ENSDART00000129269 topors chr1:24987728-24992549 (+), ENSDART00000102379 topors chr1:24987780-24991833 (+)	chr1:24987728-24992549	+	1	Annotated and revised	2	317	314		Known 3'UTR	583	1	24992546	583	Novel 3'UTR (Shortened)	190	1	24992371	190
zgc:136758	ENSDART00000077390 zgc:136758 chr1:55620124-55630034 (+)	chr1:55620124-55630034	+	1	Annotated and revised	2	2877	2881	chr1:55627157-55630038	Known 3'UTR	116	1	55630038	116	Novel 3'UTR (Shortened)	10	1	55629390	10
CR788255.1	ENSDART00000060693 CR788255.1 chr1:56183147-56185920 (+)	chr1:56183147-56185920	+	0	Only extended	1	0	392	chr1:56185920-56186312	Novel 3'UTR (Extended)	8	1	56186312	8
ITPRIP (2 of 2)	ENSDART00000052998 ITPRIP (2 of 2) chr1:50016607-50018943 (+)	chr1:50016607-50018943	+	0	Annotated and revised	3	0	681	chr1:50018943-50018957	Known 3'UTR	22	1	50018957	22	Novel 3'UTR (Extended)	34	2	50019065	15	50019624	19
prkacab	ENSDART00000019936 prkacab chr1:56466028-56495655 (+)	chr1:56466028-56495655	+	1	Annotated and revised	4	1186	1183	chr1:56494469-56495652	Known 3'UTR	1527	2	56495640	5	56495652	1522	Novel 3'UTR (Shortened)	15	2	56494933	11	56495020	4
CR774189.1	ENSDART00000111546 CR774189.1 chr1:28445864-28449638 (+)	chr1:28445864-28449638	+	0	Only extended	1	0	232	chr1:28449638-28449870	Novel 3'UTR (Extended)	7	1	28449870	7
si:ch211-216c6.1	ENSDART00000113020 si:ch211-216c6.1 chr1:25256873-25269817 (+), ENSDART00000149120 si:ch211-216c6.1 chr1:25238947-25269896 (+)	chr1:25238947-25269896	+	2	Annotated and revised	8	3235	3147	chr1:25266661-25269546	Known 3'UTR	803	2	25269808	758	25269825	45	Novel 3'UTR (Shortened)	1389	6	25268119	36	25269183	42	25269331	6	25269460	13	25269546	1223	25269677	69
OXGR1 (2 of 4)	NM_207588 Oxgr1 chr1:1805694-1806048 (-), ENSDART00000041936 OXGR1 (2 of 4) chr1:1804832-1808385 (-)	chr1:1804832-1808385	-	1	Only extended	1	265	4389	chr1:1801305-1805097	Novel 3'UTR (Extended)	24	1	1801305	24
CCRN4L (1 of 2)	ENSDART00000111026 CCRN4L (1 of 2) chr1:12832674-12836850 (+)	chr1:12832667-12836850	+	0	Only extended	7	0	1627	chr1:12836850-12838477	Novel 3'UTR (Extended)	330	7	12837100	69	12837374	62	12837440	4	12837748	80	12837761	4	12837859	8	12838477	103
si:ch211-89o9.4	ENSDART00000148251 si:ch211-89o9.4 chr1:41835181-41844979 (+)	chr1:41835181-41844979	+	1	Only Novel 3'UTR (Shortened)	1	411	72	chr1:41844568-41844640	Novel 3'UTR (Shortened)	1974	1	41844640	1974
ltv1	ENSDART00000010543 ltv1 chr1:54432430-54447381 (-)	chr1:54432430-54447381	-	1	Annotated and revised	3	564	824	chr1:54432505-54432994	Known 3'UTR	5391	1	54432505	5391	Novel 3'UTR (Extended)	19	1	54432170	19	Novel 3'UTR (Shortened)	12	1	54432557	12
SLC24A2 (2 of 2)	ENSDART00000111805 SLC24A2 (2 of 2) chr1:11249038-11280423 (-), ENSDART00000080100 SLC24A2 (2 of 2) chr1:11245713-11280431 (-)	chr1:11245713-11280431	-	2	Annotated and revised	2	3526	3523		Known 3'UTR	389	1	11245716	389	Novel 3'UTR (Shortened)	4	1	11247537	4
CD97 (2 of 3)	ENSDART00000110808 CD97 (2 of 3) chr1:59215521-59225986 (+)	chr1:59215521-59225986	+	0	Only extended	2	0	673	chr1:59225986-59226659	Novel 3'UTR (Extended)	323	2	59226288	4	59226659	319
SDK1 (2 of 2)	ENSDART00000141238 SDK1 (2 of 2) chr1:10308296-10556009 (-), ENSDART00000144164 SDK1 (2 of 2) chr1:10523584-10556007 (-), ENSDART00000091205 SDK1 (2 of 2) chr1:10308652-10556008 (-)	chr1:10308296-10556009	-	2	Only extended	3	356	4122		Novel 3'UTR (Extended)	41	3	10304530	13	10307816	14	10307997	14
LPHN1 (2 of 2)	ENSDART00000083358 LPHN1 (2 of 2) chr1:59475544-59484499 (-)	chr1:59475544-59484499	-	0	None associated with 3' UTR	0	0	0
dis3	NM_001094711 dis3 chr1:29797908-29818461 (-), ENSDART00000085454 dis3 chr1:29792708-29818461 (-)	chr1:29792708-29818461	-	1	Annotated and revised	3	331	643	chr1:29792708-29793039	Known 3'UTR	438	2	29792698	14	29792708	424	Novel 3'UTR (Extended)	8	1	29792468	8
klf3	ENSDART00000014916 klf3 chr1:17336040-17356958 (-)	chr1:17336040-17356958	-	2	Annotated and revised	7	2061	2125	chr1:17336030-17338101	Known 3'UTR	617	3	17335976	4	17336030	415	17336042	198	Novel 3'UTR (Shortened)	197	4	17336207	15	17337567	10	17337581	107	17337835	65
zp3c	ENSDART00000143474 zp3c chr1:50020623-50027810 (-)	chr1:50020623-50027810	-	1	Annotated and revised	6	103	1093	chr1:50020624-50020726	Known 3'UTR	767	5	50020570	5	50020624	712	50020634	18	50020652	20	50020688	12	Novel 3'UTR (Extended)	19	1	50019633	19
gng13a	ENSDART00000028276 gng13a chr1:8303323-8303888 (-), ENSDART00000147277 gng13a chr1:8303164-8304091 (-), ENSDART00000135219 gng13a chr1:8303168-8304091 (-)	chr1:8303164-8304091	-	2	No 3P tags	-	211	211
fam160a1	ENSDART00000086556 fam160a1 chr1:23343889-23368434 (+)	chr1:23343889-23368434	+	0	Only extended	5	0	6943	chr1:23368434-23375377	Novel 3'UTR (Extended)	641	5	23368823	4	23371505	13	23371646	10	23371915	44	23375377	570
FASTKD2	ENSDART00000108816 FASTKD2 chr1:5089767-5107583 (+), ENSDART00000145378 FASTKD2 chr1:5089152-5104178 (+)	chr1:5089152-5107583	+	1	Annotated and revised	2	136	138		Known 3'UTR	52	1	5107585	52	Novel 3'UTR (Shortened)	13	1	5107478	13
inab	ENSDART00000075260 inab chr1:31318462-31324554 (+), NM_001086482 MGC68885 chr1:31318164-31320998 (+)	chr1:31318164-31324554	+	1	Annotated and revised	2	3340	3340	chr1:31321214-31324554	Known 3'UTR	1342	1	31324554	1342	Novel 3'UTR (Shortened)	4	1	31321688	4
cct4	ENSDART00000026409 cct4 chr1:54262346-54275393 (-)	chr1:54262346-54275393	-	1	Annotated and revised	3	120	477	chr1:54262346-54262466	Known 3'UTR	2376	1	54262346	2376	Novel 3'UTR (Extended)	32	2	54261989	20	54262132	12
si:ch211-145b13.6	ENSDART00000136938 si:ch211-145b13.6 chr1:24907879-24909925 (-), ENSDART00000102346 si:ch211-145b13.6 chr1:24909033-24909544 (-), ENSDART00000133502 si:ch211-145b13.6 chr1:24907922-24909915 (-)	chr1:24907879-24909925	-	2	Only annotated	1	128	122		Known 3'UTR	684	1	24907885	684
esf1	ENSDART00000033047 esf1 chr1:51712827-51729638 (-), ENSDART00000146612 esf1 chr1:51712687-51729669 (-)	chr1:51712687-51729669	-	1	Annotated and revised	4	140	989	chr1:51712688-51712827	Known 3'UTR	1120	2	51712677	442	51712688	678	Novel 3'UTR (Extended)	18	2	51711838	8	51712070	10
CABZ01072534.1	ENSDART00000114414 CABZ01072534.1 chr1:41080394-41120369 (-)	chr1:41080394-41120369	-	0	None associated with 3' UTR	0	0	0
vps54	ENSDART00000074034 vps54 chr1:55551106-55577651 (-)	chr1:55551097-55577651	-	1	Only extended	6	9	2511	chr1:55548887-55551106	Novel 3'UTR (Extended)	982	6	55548595	16	55548887	618	55548953	149	55549244	12	55550462	30	55550644	157
NFKBIZ	ENSDART00000140496 NFKBIZ chr1:592854-595703 (-), NM_001107095 Nfkbiz chr1:592783-596463 (-)	chr1:592783-596463	-	1	Only extended	1	30	865	chr1:592142-592854	Novel 3'UTR (Extended)	438	1	592142	438
CHST12 (3 of 7)	ENSDART00000139755 CHST12 (3 of 7) chr1:10822604-10823555 (-)	chr1:10822604-10823555	-	0	No 3P tags	-	0	0
atp11a	ENSDART00000040284 atp11a chr1:46766820-46897807 (-), ENSDART00000145117 atp11a chr1:46773132-46841106 (-), ENSDART00000150029 atp11a chr1:46760579-46898492 (-)	chr1:46760579-46898492	-	1	Annotated and revised	5	6241	6257		Known 3'UTR	188	1	46760563	188	Novel 3'UTR (Extended)	31	2	46768769	8	46768790	23	Novel 3'UTR (Shortened)	9	1	46761744	9	Novel 3'UTR (Alternative last exon)	4	1	46768755	4
usp53b	ENSDART00000109714 usp53b chr1:24711568-24768692 (-), ENSDART00000145012 usp53b chr1:24743836-24768692 (-)	chr1:24711568-24768692	-	0	Only extended	2	0	653		Novel 3'UTR (Extended)	324	2	24709698	316	24709708	8
si:ch211-15j1.5	ENSDART00000146788 si:ch211-15j1.5 chr1:58805486-58807894 (+)	chr1:58805486-58807894	+	0	No 3P tags	-	0	0
CT583626.4	ENSDART00000123123 CT583626.4 chr1:44810133-44811748 (+)	chr1:44810133-44811748	+	0	No 3P tags	-	0	0
UGT8	ENSDART00000124770 UGT8 chr1:19337370-19375082 (-), ENSDART00000054510 UGT8 chr1:19340626-19375073 (-)	chr1:19337370-19375082	-	1	Annotated and revised	2	3517	3516		Known 3'UTR	1241	1	19337371	1241	Novel 3'UTR (Shortened)	4	1	19339522	4
rcbtb1	ENSDART00000053222 rcbtb1 chr1:47132342-47147148 (-), ENSDART00000148759 rcbtb1 chr1:47139628-47147129 (-)	chr1:47132342-47147148	-	1	Annotated and revised	3	1030	1029		Known 3'UTR	227	1	47132343	227	Novel 3'UTR (Shortened)	9	2	47132625	4	47133010	5
NPY2R (2 of 3)	ENSDART00000125009 NPY2R (2 of 3) chr1:9398834-9409901 (+)	chr1:9398834-9409901	+	0	None associated with 3' UTR	0	0	0
CABZ01058873.2	ENSDART00000125980 CABZ01058873.2 chr1:57970214-57974923 (-)	chr1:57970214-57974923	-	0	None associated with 3' UTR	0	0	0
SPRED2 (2 of 2)	ENSDART00000074284 SPRED2 (2 of 2) chr1:51953409-51983483 (-)	chr1:51953409-51983483	-	2	Annotated and revised	7	5082	5090	chr1:51953401-51958491	Known 3'UTR	840	2	51953390	88	51953401	752	Novel 3'UTR (Shortened)	173	5	51953959	9	51953970	14	51955689	43	51955974	102	51956063	5
USP38	ENSDART00000109678 USP38 chr1:35183732-35196266 (+)	chr1:35183732-35196266	+	0	Annotated and revised	5	0	1370	chr1:35196266-35196852	Known 3'UTR	14	1	35196362	14	Novel 3'UTR (Extended)	580	4	35196479	26	35196562	5	35196852	540	35197636	9
klf12a	ENSDART00000012873 klf12a chr1:34129535-34189404 (+)	chr1:34129535-34189404	+	1	Only annotated	1	1128	1122	chr1:34188276-34189398	Known 3'UTR	183	1	34189398	183
npnt	ENSDART00000134988 npnt chr1:50592553-50639094 (+), ENSDART00000018469 npnt chr1:50592522-50694666 (+)	chr1:50592522-50694666	+	0	Only extended	2	0	3409		Novel 3'UTR (Extended)	35	2	50697806	15	50698075	20
si:ch211-205a14.13	ENSDART00000150059 si:ch211-205a14.13 chr1:37868853-37873147 (+)	chr1:37868853-37873147	+	1	No 3P tags	-	361	361
nt5c2b	ENSDART00000065125 nt5c2b chr1:31263156-31310602 (-), ENSDART00000126286 nt5c2b chr1:31260663-31307517 (-)	chr1:31260663-31310602	-	2	Annotated and revised	3	2642	2642	chr1:31260663-31263305	Known 3'UTR	4414	2	31260663	4399	31263156	15	Novel 3'UTR (Shortened)	19	1	31262446	19
si:ch211-208h7.4	ENSDART00000133208 si:ch211-208h7.4 chr1:24075576-24173549 (+), ENSDART00000111426 si:ch211-208h7.4 chr1:24075571-24173548 (+)	chr1:24075571-24173549	+	1	Only annotated	1	199	203	chr1:24173350-24173553	Known 3'UTR	14	1	24173553	14
anp32b	NM_001139759 LOC100194711 chr1:25626462-25628906 (-), ENSDART00000102500 anp32b chr1:25626436-25630757 (-)	chr1:25626436-25630757	-	2	Annotated and revised	4	540	1009	chr1:25626437-25626976	Known 3'UTR	22253	2	25626425	2168	25626437	20085	Novel 3'UTR (Extended)	637	2	25625950	244	25625967	393
pi4k2a	ENSDART00000130675 pi4k2a chr1:55276762-55294966 (+)	chr1:55276762-55294966	+	2	Annotated and revised	7	2365	2364	chr1:55292601-55294965	Known 3'UTR	420	6	55294895	6	55294937	5	55294947	53	55294965	312	55294976	40	55295008	4	Novel 3'UTR (Shortened)	16	1	55293115	16
si:dkeyp-75b4.8	ENSDART00000132607 si:dkeyp-75b4.8 chr1:9042467-9058198 (+), ENSDART00000111299 si:dkeyp-75b4.8 chr1:9045172-9058104 (+)	chr1:9042467-9058198	+	1	Only extended	2	94	1032	chr1:9058104-9058469	Novel 3'UTR (Extended)	20	2	9058469	13	9059136	7
obfc1	ENSDART00000027624 obfc1 chr1:47996994-48010591 (+)	chr1:47996994-48010591	+	1	Only annotated	3	222	220	chr1:48010369-48010500	Known 3'UTR	857	3	48010500	505	48010589	345	48010599	7
gyg2	ENSDART00000041191 gyg2 chr1:33002714-33019030 (-)	chr1:33002714-33019030	-	1	No 3P tags	-	262	262
si:dkey-222h21.4	ENSDART00000142285 si:dkey-222h21.4 chr1:58999218-58999898 (+)	chr1:58999218-58999898	+	0	No 3P tags	-	0	0
CU896655.2	ENSDART00000112794 CU896655.2 chr1:59287549-59298201 (+)	chr1:59287549-59298201	+	0	Only extended	1	0	528	chr1:59298201-59298729	Novel 3'UTR (Extended)	16	1	59298729	16
wu:fa03e10	ENSDART00000130750 wu:fa03e10 chr1:57116381-57122151 (-)	chr1:57116381-57122151	-	1	Annotated and revised	2	2652	2646	chr1:57116387-57119033	Known 3'UTR	1306	1	57116387	1306	Novel 3'UTR (Shortened)	218	1	57116531	218
INTS12 (1 of 2)	ENSDART00000003618 INTS12 (1 of 2) chr1:25414013-25419172 (-)	chr1:25328936-25419172	-	2	Only annotated	1	194	201	chr1:25414006-25414207	Known 3'UTR	1225	1	25414006	1225
ccdc149b	ENSDART00000125414 ccdc149b chr1:40426694-40444866 (+), ENSDART00000011727 ccdc149b chr1:40426578-40445530 (+)	chr1:40426578-40445530	+	1	Annotated and revised	6	664	903	chr1:40444866-40445526	Known 3'UTR	604	2	40445506	3	40445526	601	Novel 3'UTR (Extended)	157	2	40445757	19	40445769	138	Novel 3'UTR (Shortened)	12	2	40445093	8	40445301	4
hhip	ENSDART00000085051 hhip chr1:35498196-35543978 (+)	chr1:35498150-35543978	+	1	Annotated and revised	2	2083	2084	chr1:35541895-35543979	Known 3'UTR	1128	1	35543979	1128	Novel 3'UTR (Shortened)	14	1	35542617	14
VPS37C	ENSDART00000067621 VPS37C chr1:45405386-45418016 (+)	chr1:45405386-45418016	+	1	Annotated and revised	3	2989	2988	chr1:45415027-45418015	Known 3'UTR	736	1	45418015	736	Novel 3'UTR (Shortened)	98	2	45415547	93	45417147	5
zgc:66455	ENSDART00000074218 zgc:66455 chr1:54009244-54022662 (-), ENSDART00000143349 zgc:66455 chr1:54009242-54022662 (-)	chr1:54009242-54022662	-	1	Annotated and revised	4	158	1678	chr1:54009238-54009400	Known 3'UTR	1107	3	54009147	8	54009238	1075	54009249	24	Novel 3'UTR (Extended)	5	1	54007722	5
C1H4orf33	ENSDART00000008127 C1H4orf33 chr1:11690609-11694017 (+), ENSDART00000136421 C1H4orf33 chr1:11690394-11693431 (+), ENSDART00000139440 C1H4orf33 chr1:11690425-11693483 (+), ENSDART00000138622 C1H4orf33 chr1:11690335-11693911 (+)	chr1:11690335-11694017	+	2	Annotated and revised	7	349	2302		Known 3'UTR	928	4	11693849	4	11693880	150	11694006	6	11694016	768	Novel 3'UTR (Extended)	48	3	11694137	6	11694651	34	11695785	8
ppm1k	ENSDART00000148285 ppm1k chr1:51101257-51118114 (-), ENSDART00000015591 ppm1k chr1:51100793-51115698 (-), ENSDART00000048814 ppm1k chr1:51101656-51115383 (-)	chr1:51100793-51118114	-	3	Annotated and revised	3	2131	2131	chr1:51100793-51102924	Known 3'UTR	3110	2	51100783	187	51100793	2923	Novel 3'UTR (Shortened)	7	1	51102186	7
CABZ01084618.1	ENSDART00000123327 CABZ01084618.1 chr1:59604335-59605730 (+), NM_001008701 LPHN1 chr1:59592845-59617083 (+)	chr1:59592845-59617083	+	0	Only extended	2	0	1508	chr1:59617083-59618591	Novel 3'UTR (Extended)	11	2	59617544	4	59618591	7
pou4f2	ENSDART00000124112 pou4f2 chr1:36145050-36148416 (+)	chr1:36145050-36148416	+	2	Annotated and revised	4	1637	6023	chr1:36146779-36148372	Known 3'UTR	412	1	36148372	412	Novel 3'UTR (Extended)	167	2	36150184	15	36152802	152	Novel 3'UTR (Shortened)	13	1	36147595	13
klf7	ENSDART00000109356 klf7 chr1:5266775-5357592 (-)	chr1:5266775-5357592	-	1	Only extended	2	1853	7217	chr1:5261411-5268628	Novel 3'UTR (Extended)	582	2	5261411	571	5263291	11
fam134a	ENSDART00000092277 fam134a chr1:5053608-5074378 (+), ENSDART00000146473 fam134a chr1:5070609-5074378 (+)	chr1:5053608-5074378	+	1	Annotated and revised	12	486	5830	chr1:5073892-5078610	Known 3'UTR	178	2	5074377	141	5074475	37	Novel 3'UTR (Extended)	300	9	5074559	4	5074648	4	5076273	17	5076729	5	5078191	4	5078597	4	5078610	189	5078820	17	5079841	56	Novel 3'UTR (Shortened)	30	1	5074170	30
sorbs2a	ENSDART00000041215 sorbs2a chr1:16489843-16545516 (-), ENSDART00000138475 sorbs2a chr1:16489550-16545509 (-)	chr1:16489550-16545516	-	1	Only revised	11	293	6934	chr1:16483547-16489843	Novel 3'UTR (Extended)	384	10	16482909	44	16482992	8	16483392	21	16483434	21	16483444	9	16483547	135	16484171	14	16486189	4	16486392	81	16486468	47	Novel 3'UTR (Alternative last exon)	6	1	16493262	6
pdcd11	ENSDART00000124833 pdcd11 chr1:49941415-49987572 (+), ENSDART00000074342 pdcd11 chr1:49943844-49987559 (+), ENSDART00000108733 pdcd11 chr1:49941436-49980388 (+)	chr1:49941415-49987572	+	2	Only annotated	1	1472	211		Known 3'UTR	1612	1	49987567	1612
tmx2b	ENSDART00000130873 tmx2b chr1:45024760-45037337 (-), ENSDART00000009858 tmx2b chr1:45024759-45037415 (-)	chr1:45024759-45037415	-	1	Annotated and revised	40	2445	1601	chr1:45024760-45027204	Known 3'UTR	4244	2	45024749	46	45024760	4198	Novel 3'UTR (Shortened)	687	38	45024984	6	45025093	126	45025128	8	45025192	18	45025216	29	45025304	30	45025416	10	45025432	13	45025451	10	45025465	9	45025671	5	45025695	35	45026001	34	45026017	11	45026030	37
TRIM35 (42 of 43)	ENSDART00000100405 TRIM35 (42 of 43) chr1:59409272-59419126 (-)	chr1:59409272-59419126	-	0	None associated with 3' UTR	0	0	0
RADIL (1 of 2)	ENSDART00000110154 RADIL (1 of 2) chr1:6566680-6586364 (+)	chr1:6566680-6586364	+	0	Only extended	1	0	195	chr1:6586364-6586559	Novel 3'UTR (Extended)	41	1	6586559	41
myoz2b	ENSDART00000128472 myoz2b chr1:24775678-24791691 (-), ENSDART00000054213 myoz2b chr1:24774991-24794052 (-), ENSDART00000146488 myoz2b chr1:24775618-24794077 (-), ENSDART00000136321 myoz2b chr1:24774990-24794079 (-)	chr1:24774990-24794079	-	2	Only annotated	2	688	739	chr1:24774991-24775678	Known 3'UTR	592	2	24774939	97	24774991	495
CABZ01118678.1	ENSDART00000100163 CABZ01118678.1 chr1:59908884-59915757 (-)	chr1:59908884-59915757	-	0	None associated with 3' UTR	0	0	0
snrpb2	ENSDART00000057601 snrpb2 chr1:52196039-52204177 (-)	chr1:52196039-52204177	-	2	Annotated and revised	2	253	2075	chr1:52196037-52196292	Known 3'UTR	6506	1	52196037	6506	Novel 3'UTR (Extended)	31	1	52194217	31
PDILT	ENSDART00000055011 PDILT chr1:8311011-8326027 (-)	chr1:8311011-8326027	-	1	Annotated and revised	4	113	225	chr1:8311012-8311124	Known 3'UTR	156	1	8311012	156	Novel 3'UTR (Alternative last exon)	23	3	8313324	15	8313466	4	8314181	4
crb3b	ENSDART00000089358 crb3b chr1:56727186-56731247 (+)	chr1:56727186-56731247	+	1	Only extended	5	354	1793	chr1:56730893-56731700	Novel 3'UTR (Extended)	1275	5	56731599	7	56731700	622	56731716	356	56731937	285	56732686	5
si:dkey-28b4.8	ENSDART00000046562 si:dkey-28b4.8 chr1:45108953-45156791 (-), ENSDART00000133210 si:dkey-28b4.8 chr1:45107204-45159739 (-)	chr1:45107204-45159739	-	1	Annotated and revised	5	1749	1748	chr1:45107205-45108953	Known 3'UTR	2750	1	45107205	2750	Novel 3'UTR (Shortened)	477	4	45107761	354	45108324	4	45108335	46	45108464	73
grk1a	ENSDART00000081743 grk1a chr1:119766-132829 (+), NM_204695 GRK1 chr1:119940-130445 (+)	chr1:119766-132829	+	1	Only annotated	1	2189	2184	chr1:130640-132824	Known 3'UTR	102	1	132824	102
cyp2u1	ENSDART00000048281 cyp2u1 chr1:50430484-50439123 (-)	chr1:50430484-50439123	-	1	Only extended	5	14	2615	chr1:50427883-50430498	Novel 3'UTR (Extended)	807	5	50427883	630	50427904	142	50428024	7	50428215	16	50428744	12
crybb1l2	ENSDART00000100309 crybb1l2 chr1:44895138-44902395 (+), ENSDART00000127380 crybb1l2 chr1:44897415-44902394 (+), ENSDART00000127087 crybb1l2 chr1:44895138-44902394 (+)	chr1:44895138-44902395	+	1	Only annotated	1	504	503	chr1:44901891-44902394	Known 3'UTR	1418	1	44902394	1418
CR855327.1	ENSDART00000121738 CR855327.1 chr1:50920315-50921353 (+)	chr1:50920315-50921353	+	0	No 3P tags	-	0	0
zgc:92518	ENSDART00000102235 zgc:92518 chr1:341477-345509 (-), ENSDART00000123620 zgc:92518 chr1:342015-346228 (-), ENSDART00000125141 zgc:92518 chr1:340909-345493 (-)	chr1:340909-346228	-	1	Only annotated	1	842	842		Known 3'UTR	311	1	341477	311
si:ch73-190m4.1	ENSDART00000131544 si:ch73-190m4.1 chr1:51120950-51128153 (+), ENSDART00000140883 si:ch73-190m4.1 chr1:51134404-51144304 (+), ENSDART00000111114 si:ch73-190m4.1 chr1:51121102-51143796 (+)	chr1:51120950-51144304	+	1	Only extended	1	508	1238		Novel 3'UTR (Extended)	25	1	51145034	25
stox2	ENSDART00000139354 stox2 chr1:40264071-40340079 (-), ENSDART00000149730 stox2 chr1:40260854-40306124 (-), ENSDART00000102735 stox2 chr1:40264378-40275035 (-)	chr1:40260854-40340079	-	2	Only Novel 3'UTR (Shortened)	7	3524	3258	chr1:40261120-40264378	Novel 3'UTR (Shortened)	731	7	40261120	568	40261400	6	40262818	88	40262987	21	40263438	5	40263515	19	40264209	24
si:dkey-79f11.10	ENSDART00000146090 si:dkey-79f11.10 chr1:6983832-6989556 (+)	chr1:6983832-6989556	+	1	Only annotated	1	254	255	chr1:6989302-6989557	Known 3'UTR	658	1	6989557	658
pknox1.2	ENSDART00000053097 pknox1.2 chr1:47461133-47475112 (-), ENSDART00000130607 pknox1.2 chr1:47457342-47478241 (-), ENSDART00000125032 pknox1.2 chr1:47461099-47481249 (-)	chr1:47457342-47481249	-	2	Annotated and revised	7	3791	3791	chr1:47457342-47461133	Known 3'UTR	1643	1	47457342	1643	Novel 3'UTR (Shortened)	179	6	47457701	64	47457712	9	47457800	27	47458047	17	47458263	4	47460208	58
CABP2 (1 of 2)	ENSDART00000073742 CABP2 (1 of 2) chr1:44709370-44723520 (-)	chr1:44709370-44723520	-	1	Only annotated	2	861	861	chr1:44709370-44710382	Known 3'UTR	31	2	44709370	19	44709380	12
si:dkey-222h21.7	ENSDART00000132546 si:dkey-222h21.7 chr1:58968870-58971836 (+), ENSDART00000131475 si:dkey-222h21.7 chr1:58968855-58969477 (+)	chr1:58968855-58971836	+	0	No 3P tags	-	0	0
caspb	ENSDART00000136998 caspb chr1:58737274-58751108 (-), ENSDART00000073778 caspb chr1:58737282-58751091 (-)	chr1:58737274-58751108	-	1	Only annotated	1	550	542	chr1:58737282-58737824	Known 3'UTR	328	1	58737282	328
PLA2G12A	ENSDART00000143628 PLA2G12A chr1:11225388-11228181 (+), ENSDART00000128845 PLA2G12A chr1:11225368-11229671 (+), ENSDART00000103406 PLA2G12A chr1:11225304-11228820 (+)	chr1:11225304-11229671	+	3	Annotated and revised	9	1621	3660	chr1:11228050-11229671	Known 3'UTR	437	4	11228094	31	11228158	5	11229671	395	11229688	6	Novel 3'UTR (Extended)	5	1	11231710	5	Novel 3'UTR (Shortened)	136	4	11228432	73	11228503	25	11228560	16	11229517	22
odam	ENSDART00000137646 odam chr1:44340717-44345961 (-), ENSDART00000114345 odam chr1:44340717-44345899 (-)	chr1:44340717-44345961	-	1	Only annotated	1	113	119	chr1:44340711-44340914	Known 3'UTR	52	1	44340711	52
CABZ01059421.1	ENSDART00000127947 CABZ01059421.1 chr1:57263866-57289613 (-)	chr1:57263866-57289613	-	0	No 3P tags	-	0	0
GPC6 (2 of 4)	ENSDART00000126093 GPC6 (2 of 4) chr1:2641198-2673283 (+)	chr1:2546652-2673283	+	0	No 3P tags	-	0	0
CABZ01072534.2	ENSDART00000127907 CABZ01072534.2 chr1:41067044-41078571 (-)	chr1:41067044-41078571	-	1	Only annotated	1	273	273	chr1:41067044-41067317	Known 3'UTR	585	1	41067044	585
DTX4 (2 of 2)	ENSDART00000146310 DTX4 (2 of 2) chr1:41879161-41880116 (+), ENSDART00000114230 DTX4 (2 of 2) chr1:41879455-41911414 (+)	chr1:41879161-41911414	+	1	Only extended	5	166	6031		Novel 3'UTR (Extended)	170	5	41914093	5	41914113	13	41914258	35	41914272	9	41917445	108
BX005416.1	ENSDART00000039465 BX005416.1 chr1:47626630-47632322 (-)	chr1:47626630-47632322	-	0	None associated with 3' UTR	0	0	0
GEMIN8	ENSDART00000131124 GEMIN8 chr1:27988881-27991901 (-), ENSDART00000053933 GEMIN8 chr1:27988877-27991895 (-), ENSDART00000142350 GEMIN8 chr1:27989299-27991897 (-)	chr1:27988877-27991901	-	2	Annotated and revised	7	568	806	chr1:27988881-27989445	Known 3'UTR	2908	5	27988861	54	27988881	2529	27989214	24	27989239	221	27989339	80	Novel 3'UTR (Extended)	5	1	27988639	5	Novel 3'UTR (Shortened)	67	1	27989067	67
crmp1	ENSDART00000098095 crmp1 chr1:13228200-13249023 (+), ENSDART00000064468 crmp1 chr1:13233143-13249457 (+)	chr1:13228200-13249457	+	1	Annotated and revised	3	434	2854	chr1:13249023-13251877	Known 3'UTR	45	2	13249113	9	13249455	36	Novel 3'UTR (Extended)	1048	1	13251877	1048
lrata	ENSDART00000054228 lrata chr1:24554197-24555439 (+)	chr1:24554197-24555439	+	1	Only annotated	3	454	516	chr1:24554985-24555437	Known 3'UTR	1084	3	24555437	1066	24555478	6	24555501	12
-	ENSDART00000128742 chr1:59918685-59926949 (-)	chr1:59918685-59926949	-	0	Only extended	1	0	2146	chr1:59916539-59918685	Novel 3'UTR (Extended)	1455	1	59916539	1455
si:dkey-222h21.12	ENSDART00000147324 si:dkey-222h21.12 chr1:58892273-58902388 (+), NM_001206214 GGT1 chr1:58892855-58900066 (+)	chr1:58892273-58902388	+	0	None associated with 3' UTR	0	0	0
tecrb	ENSDART00000134770 tecrb chr1:56292487-56316413 (+), ENSDART00000144983 tecrb chr1:56295106-56313461 (+), ENSDART00000139312 tecrb chr1:56298059-56314106 (+), ENSDART00000108838 tecrb chr1:56292395-56316957 (+)	chr1:56292395-56316957	+	1	Annotated and revised	7	413	5435		Known 3'UTR	375	4	56316895	18	56316905	16	56316954	334	56317047	7	Novel 3'UTR (Extended)	6104	3	56317068	5667	56318743	364	56318896	73
ints12	ENSDART00000125690 ints12 chr1:25321185-25326663 (-)	chr1:25321185-25326663	-	2	Only annotated	1	194	194	chr1:25321185-25321379	Known 3'UTR	106	1	25321185	106
tnrc5	NM_001075439 CNPY3 chr1:9646205-9648897 (-), ENSDART00000040116 tnrc5 chr1:9638794-9649733 (-)	chr1:9638794-9649733	-	1	Only revised	11	708	1346	chr1:9638438-9639502	Novel 3'UTR (Extended)	697	10	9638146	63	9638156	73	9638177	24	9638198	5	9638232	12	9638417	22	9638438	459	9638457	25	9638567	7	9638657	7	Novel 3'UTR (Shortened)	4	1	9638963	4
dctd	ENSDART00000053763 dctd chr1:40175764-40221985 (-), NM_001161515 Dctd chr1:39959911-40216003 (-)	chr1:39959911-40221985	-	2	Annotated and revised	8	710	916	chr1:40176420-40176474	Known 3'UTR	852	4	40175669	13	40175762	827	40175777	7	40175787	5	Novel 3'UTR (Extended)	5	1	40175558	5	Novel 3'UTR (Shortened)	1046	3	40175940	6	40175951	77	40176420	963
[truncated: 23,908 more rows]
[truncated: 53 more columns]
