# Supplementary material for: Extensive alternative polyadenylation during zebrafish development
Source: HighWire-hosted journal article supplement (doi:10.1101/gr.139733.112), 2012-06-21
Supplement: TableS4.xlsx [file TableS4.xlsx]

## Sheet: Sheet1
Transcripts in cluster	Transcript with longest exonic sequence	Symbol	Chromosome	Strand	Start	End	Coding sequence start	Coding sequence end	Number of exons	Exon start positions	Exon end positions
[ENSDART00000124576 CABZ01002188.1 Zv9_NA117:8757-13415 (-)]	ENSDART00000124576	CABZ01002188.1	Zv9_NA117	-	8385	13415	8727	13415	4	8385,11481,11771,13376,	8790,11692,12673,13415,
[ENSDART00000064387 PREP (2 of 2) Zv9_NA135:25442-29694 (-)]	ENSDART00000064387	PREP (2 of 2)	Zv9_NA135	-	23050	29694	25442	29694	6	23050,27012,28129,29306,29506,29681,	25731,27169,28261,29401,29651,29694,
[ENSDART00000123107 CABZ01032488.1 Zv9_NA141:4493-15048 (-), NM_001111576 rf2c Zv9_NA141:5244-15120 (-)]	ENSDART00000123107	CABZ01032488.1	Zv9_NA141	-	4347	15048	4493	15048	7	4347,5208,5406,5776,8387,12189,15009,	4526,5323,5564,5941,8572,12292,15048,
[ENSDART00000100930 CABZ01073004.1 Zv9_NA15:957-17553 (+), ENSDART00000098962 CABZ01073004.1 Zv9_NA15:6289-17553 (+)]	ENSDART00000098962	CABZ01073004.1	Zv9_NA15	+	6289	17553	6289	11755	4	6289,7482,11579,12838,	6655,7597,12746,17553,
[ENSDART00000111216 trim32 Zv9_NA154:29809-32054 (-)]	ENSDART00000111216	trim32	Zv9_NA154	-	27798	32054	30038	32030	1	27798,	32054,
[ENSDART00000130296 CABZ01088071.1 Zv9_NA160:409-4759 (-)]	ENSDART00000130296	CABZ01088071.1	Zv9_NA160	-	65	4759	409	4759	1	65,	4759,
[ENSDART00000131088 FBF1 Zv9_NA163:2937-15295 (+)]	ENSDART00000131088	FBF1	Zv9_NA163	+	2937	15298	2937	15243	4	2937,6597,8872,15168,	2976,6694,8976,15298,
[ENSDART00000127815 pde8a Zv9_NA18:65-2716 (+)]	ENSDART00000127815	pde8a	Zv9_NA18	+	65	3553	65	3422	8	65,301,1177,1298,1971,2263,2583,3303,	143,466,1226,1434,2170,2481,2717,3553,
[ENSDART00000123111 MRPS16 Zv9_NA192:15876-22657 (+), NM_001016347 mrps16 Zv9_NA192:18072-22018 (+)]	ENSDART00000123111	MRPS16	Zv9_NA192	+	15876	22350	16539	22081	4	15876,16525,18070,21965,	15980,16552,18331,22350,
[ENSDART00000091103 CABZ01073054.1 Zv9_NA221:4085-5142 (+), NM_001096646 sh3rf3 Zv9_NA221:4079-4331 (+)]	ENSDART00000091103	CABZ01073054.1	Zv9_NA221	+	4085	5198	4085	5142	2	4085,4953,	4292,5198,
[ENSDART00000123344 TAAR1 (7 of 9) Zv9_NA223:6228-7141 (+)]	ENSDART00000123344	TAAR1 (7 of 9)	Zv9_NA223	+	6228	7472	6228	7141	3	6228,6841,7087,	6829,6846,7472,
[ENSDART00000131000 WDR77 Zv9_NA232:22678-34551 (-)]	ENSDART00000131000	WDR77	Zv9_NA232	-	22447	34551	22663	34551	12	22447,22900,26265,26436,26830,26948,27148,27266,27335,28418,28466,34466,	22762,22922,26336,26499,26844,27024,27165,27333,27374,28443,28677,34551,
[ENSDART00000109427 ZFP36 Zv9_NA234:5635-7517 (+), ENSDART00000065199 ZFP36 Zv9_NA234:5621-7517 (+)]	ENSDART00000109427	ZFP36	Zv9_NA234	+	5635	7517	6138	6754	3	5635,5842,6160,	5735,6159,7517,
[ENSDART00000114363 mcm2 Zv9_NA237:11388-31977 (-), ENSDART00000006598 mcm2 Zv9_NA237:11461-31970 (-), ENSDART00000049626 mcm2 Zv9_NA237:11388-31977 (-)]	ENSDART00000006598	mcm2	Zv9_NA237	-	11388	31970	11649	31931	22	11388,12311,14224,14733,17219,17426,17829,21048,21218,24238,24577,26519,26538,26659,26690,26700,27237,27314,27388,29575,31107,31925,	11760,12467,14407,14976,17332,17553,18080,21142,21410,24373,24785,26533,26658,26689,26699,26735,27313,27386,27510,29748,31292,31970,
[ENSDART00000061377 CABZ01086824.1 Zv9_NA243:35227-56323 (-)]	ENSDART00000061377	CABZ01086824.1	Zv9_NA243	-	34829	56323	35227	56323	5	34829,40583,43086,48284,56244,	35407,40727,43195,48378,56323,
[ENSDART00000111113 CABZ01029902.1 Zv9_NA257:57186-68399 (-), NM_174960 Gimap9 Zv9_NA257:57726-58119 (-)]	ENSDART00000111113	CABZ01029902.1	Zv9_NA257	-	56568	68399	57186	68399	4	56568,64386,68161,68370,	58181,65022,68220,68399,
[ENSDART00000108803 CCDC134 (1 of 2) Zv9_NA257:71214-81131 (-)]	ENSDART00000108803	CCDC134 (1 of 2)	Zv9_NA257	-	69131	81131	71175	74609	7	69131,73433,73629,73940,74192,74515,80976,	71301,73505,73811,74025,74314,74614,81131,
[ENSDART00000108620 PGBD4 (1 of 7) Zv9_NA260:1011-3880 (+)]	ENSDART00000108620	PGBD4 (1 of 7)	Zv9_NA260	+	1011	4684	1011	4607	7	1011,2282,2456,3855,4107,4393,4552,	1166,2444,3776,4007,4297,4456,4684,
[ENSDART00000124581 CABZ01081148.1 Zv9_NA265:7912-11573 (+)]	ENSDART00000124581	CABZ01081148.1	Zv9_NA265	+	7912	14993	7912	11588	3	7912,11047,11565,	8360,11095,14993,
[NM_001108658 Topors Zv9_NA266:25343-33715 (+), ENSDART00000058174 TOPORS (2 of 2) Zv9_NA266:25295-34378 (+)]	ENSDART00000058174	TOPORS (2 of 2)	Zv9_NA266	+	25295	34381	25295	34252	2	25295,32419,	26282,34381,
[ENSDART00000129150 RAB37 Zv9_NA276:3253-13050 (+)]	ENSDART00000129150	RAB37	Zv9_NA276	+	3253	14241	3253	13050	4	3253,7771,7910,12941,	3319,7828,7987,14241,
[ENSDART00000099026 CASKIN2 (2 of 4) Zv9_NA276:74313-82040 (-)]	ENSDART00000099026	CASKIN2 (2 of 4)	Zv9_NA276	-	74312	82040	77651	82040	6	74312,79134,79597,81632,81842,82028,	77748,79387,81151,81771,81944,82040,
[ENSDART00000128142 ARHGAP6 Zv9_NA290:33457-55823 (-)]	ENSDART00000128142	ARHGAP6	Zv9_NA290	-	32975	55823	33457	55823	12	32975,37714,37869,44507,45542,48271,48952,50649,51114,51510,55205,55705,	33843,37795,38033,44605,45722,48420,49103,50705,51322,51758,55274,55823,
[ENSDART00000003603 NFAT5 (1 of 2) Zv9_NA324:30369-47129 (+)]	ENSDART00000003603	NFAT5 (1 of 2)	Zv9_NA324	+	30369	53030	30369	47138	12	30369,33563,34634,34915,43700,43913,44410,44691,44855,45048,45649,46899,	30728,33750,34825,35088,43835,43969,44543,44772,44950,45519,46817,53030,
[ENSDART00000057015 CABZ01080599.2 Zv9_NA331:1739-8813 (+)]	ENSDART00000057015	CABZ01080599.2	Zv9_NA331	+	1739	11633	1739	8819	5	1739,4652,5976,8395,8809,	1839,4739,6066,8465,11633,
[ENSDART00000114844 CABZ01080599.1 Zv9_NA331:14142-26271 (+), NM_001077122 MGC133804 Zv9_NA331:22861-26090 (+)]	ENSDART00000114844	CABZ01080599.1	Zv9_NA331	+	14142	26273	14142	26126	7	14142,19864,20073,20239,22858,24096,26017,	14153,19991,20167,20370,23001,24294,26273,
[ENSDART00000126612 CABZ01072488.1 Zv9_NA333:19102-28858 (+)]	ENSDART00000126612	CABZ01072488.1	Zv9_NA333	+	19102	24469	19102	24367	7	19102,19625,20278,20709,21116,21476,24197,	19122,19656,20318,21027,21416,22995,24469,
[ENSDART00000125492 MEX3D Zv9_NA337:68354-69659 (-)]	ENSDART00000125492	MEX3D	Zv9_NA337	-	68072	69659	68354	69659	2	68072,68584,	68533,69659,
[ENSDART00000113165 zgc:193711 Zv9_NA347:1506-3611 (+)]	ENSDART00000113165	zgc:193711	Zv9_NA347	+	1506	3818	1528	3543	4	1506,2926,3112,3228,	1560,2976,3141,3818,
[ENSDART00000009586 CAMTA2 Zv9_NA357:2987-27784 (+), NM_001105801 Camta2 Zv9_NA357:3086-22246 (+)]	ENSDART00000009586	CAMTA2	Zv9_NA357	+	2987	31827	2987	27838	22	2987,4031,4063,4158,4819,6643,6711,6854,7009,7433,8141,8484,8578,9427,9550,11115,12381,13232,16776,22170,27536,27768,	3123,4049,4092,4227,5057,6658,6752,6892,7018,7519,8174,8519,8890,9475,9594,11320,12436,13238,16981,22229,27603,31827,
[ENSDART00000125114 OFCC1 Zv9_NA372:125960-205798 (-), NM_001122920 opo Zv9_NA372:152151-201255 (-)]	ENSDART00000125114	OFCC1	Zv9_NA372	-	125508	205798	125960	205798	8	125508,134852,135052,152145,184817,199107,201015,205721,	125985,134913,135167,152328,184977,199271,201268,205798,
[ENSDART00000063158 NUDT12 Zv9_NA384:16845-32259 (-)]	ENSDART00000063158	NUDT12	Zv9_NA384	-	16588	32259	16845	32259	7	16588,18640,20551,21141,23855,27104,32059,	16956,18840,20665,21309,24075,27393,32259,
[ENSDART00000126208 GRAMD3 Zv9_NA384:39225-61471 (+)]	ENSDART00000126208	GRAMD3	Zv9_NA384	+	39225	63091	39225	61471	12	39225,45472,48863,50866,54057,57899,58070,59103,59276,60897,61175,61404,	39341,45586,48951,50936,54161,57995,58142,59187,59391,60993,61257,63091,
[ENSDART00000065267 WDR48 (1 of 3) Zv9_NA402:577-9924 (+)]	ENSDART00000065267	WDR48 (1 of 3)	Zv9_NA402	+	577	9969	577	9924	13	577,1391,2224,3549,4067,4596,5643,5809,7040,7466,7684,8115,9828,	682,1616,2299,3652,4165,4704,5740,5908,7144,7546,7771,8308,9969,
[ENSDART00000129538 BPHL Zv9_NA409:17996-35362 (+), NM_001037206 Bphl Zv9_NA409:18549-23962 (+)]	ENSDART00000129538	BPHL	Zv9_NA409	+	17996	35445	17996	35362	8	17996,18061,18524,23318,23890,28938,32420,35271,	18059,18132,18625,23485,24044,29070,32544,35445,
[ENSDART00000087478 HUS1B Zv9_NA426:10765-13534 (+)]	ENSDART00000087478	HUS1B	Zv9_NA426	+	10765	13534	10889	13386	8	10765,11162,11767,12085,12321,12499,12837,13303,	10941,11290,11944,12193,12396,12599,12969,13534,
[ENSDART00000128824 hspb12 Zv9_NA428:3863-16021 (+)]	ENSDART00000128824	hspb12	Zv9_NA428	+	3863	17399	3863	16021	7	3863,11589,11839,15862,16272,17241,17267,	4089,11691,11970,16269,17225,17267,17399,
[NM_001082751 CLCN2 Zv9_NA428:31536-130208 (-), ENSDART00000089279 CLCN2 Zv9_NA428:31422-130220 (-)]	ENSDART00000089279	CLCN2	Zv9_NA428	-	25775	130220	31422	130220	25	25775,25826,31417,33283,35974,37764,48149,51683,52713,54898,56837,57149,59785,68800,69271,71028,71988,73135,74061,74638,75106,77746,80574,90552,130169,	25826,26021,31623,33370,36079,37803,48220,51795,52904,55032,57051,57260,59855,68956,69356,71130,72073,73261,74140,74716,75240,77875,80706,90706,130220,
[NM_001017923 C14orf28 Zv9_NA429:4123-9726 (+), ENSDART00000111290 CZv9_NA429H14orf28 Zv9_NA429:4132-10573 (+)]	ENSDART00000111290	CZv9_NA429H14orf28	Zv9_NA429	+	4132	12070	4132	10612	6	4132,5806,8433,8751,9543,10552,	4369,6093,8523,8872,9708,12070,
[ENSDART00000124007 CABZ01032951.1 Zv9_NA436:6117-19636 (+), NM_001141764 s47a1 Zv9_NA436:6796-19549 (+)]	ENSDART00000124007	CABZ01032951.1	Zv9_NA436	+	6117	20264	6117	19642	17	6117,6464,6793,7834,9812,9994,10317,10779,11017,11386,15168,15387,15556,16647,17049,19211,19360,	6213,6566,6862,7983,9855,10039,10415,10877,11131,11454,15289,15463,15626,16780,17144,19286,20264,
[ENSDART00000092756 zgc:153411 Zv9_NA437:2643-23655 (-)]	ENSDART00000092756	zgc:153411	Zv9_NA437	-	2788	23655	3195	23435	5	2788,8097,8569,12684,23347,	3364,8281,8711,12779,23655,
[ENSDART00000126980 CABZ01112049.2 Zv9_NA447:521-10065 (+)]	ENSDART00000126980	CABZ01112049.2	Zv9_NA447	+	521	10065	521	9869	18	521,748,1024,1358,2257,2552,2808,4349,4546,6189,6458,6686,6808,7010,7287,7511,7636,9652,	608,923,1272,1542,2468,2728,2878,4450,4578,6367,6563,6727,6931,7106,7416,7551,7760,10065,
[NM_001199357 Tmem164 Zv9_NA463:17399-28016 (+), ENSDART00000097663 TMEM164 Zv9_NA463:11383-28103 (+)]	ENSDART00000097663	TMEM164	Zv9_NA463	+	11383	28289	11383	28103	5	11383,17398,19581,25107,27896,	11397,17465,19660,25208,28289,
[NM_077291 col-176 Zv9_NA466:3015-18522 (+), ENSDART00000122269 CABZ01074130.1 Zv9_NA466:276-23564 (+)]	ENSDART00000122269	CABZ01074130.1	Zv9_NA466	+	276	23568	276	23084	28	276,468,680,813,2982,4248,4823,5645,5821,6604,6902,7466,7994,8167,9455,9679,9813,10160,10595,12697,12861,13008,13150,16536,17324,18325,20481,22884,	315,504,704,867,3054,4290,4880,5699,5875,6658,6956,7520,8048,8221,9509,9724,9867,10214,10649,12769,12897,13053,13183,16683,17379,18520,20559,23568,
[ENSDART00000111540 CABZ01074133.1 Zv9_NA466:31555-144310 (-)]	ENSDART00000111540	CABZ01074133.1	Zv9_NA466	-	26669	144310	31555	144310	68	26669,31883,32041,32295,32441,33728,33851,34094,34296,34434,34578,38019,38335,38499,40180,40325,40476,40617,40753,40950,41280,42861,43193,45769,45911,46303,46438,48843,48966,49874,50037,50127,50231,51697,51851,52449,55119,58423,58620,61315,61680,61823,63492,63707,63897,64067,67226,72831,74829,74962,75082,76978,77179,79973,82139,82264,85097,93930,94188,94362,96398,99305,100997,101531,101886,125035…	31749,31961,32224,32362,32621,33773,33887,34166,34350,34488,34632,38064,38389,38553,40234,40379,40530,40671,40807,41064,41292,42897,43238,45823,45947,46381,46478,48870,49010,49979,50041,50153,50255,51751,51905,52503,55173,58456,58662,61369,61743,61868,63546,63761,63951,64121,67280,72885,74883,74992,75118,77038,77233,80024,82193,82318,85151,93969,94251,94407,96515,99386,101273,101655,101998,125116…
[NM_001079457 morc3 Zv9_NA47:14874-34538 (-), ENSDART00000079729 MORC4 Zv9_NA47:9455-34743 (-)]	ENSDART00000079729	MORC4	Zv9_NA47	-	9453	34743	14799	34664	14	9453,11007,11511,13217,14773,17127,18506,18737,22917,28087,28775,29248,34468,34625,	9602,11047,11589,13337,14938,17231,18626,18866,23077,28233,28998,29381,34541,34743,
[ENSDART00000097767 pmt Zv9_NA47:37272-47148 (-)]	ENSDART00000097767	pmt	Zv9_NA47	-	37119	47148	37272	47148	8	37119,39352,39987,42320,43872,44173,45763,46986,	37383,39469,40119,42443,43962,44263,45958,47148,
[ENSDART00000043144 ccnf Zv9_NA470:52951-84764 (-), NM_001086432 ccnf Zv9_NA470:57021-77669 (-)]	ENSDART00000043144	ccnf	Zv9_NA470	-	52951	84764	53949	84643	17	52951,57020,58794,59011,64388,64682,67150,67547,71277,74256,74436,75242,77302,77599,81823,82017,84630,	54353,57193,58928,59111,64476,64863,67274,67712,71426,74334,74541,75296,77499,77667,81930,82172,84764,
[ENSDART00000125823 CCDC138 Zv9_NA472:102325-103337 (-)]	ENSDART00000125823	CCDC138	Zv9_NA472	-	102325	103337	102506	103337	2	102325,103122,	102648,103337,
[ENSDART00000108960 FAM131A Zv9_NA490:6729-20370 (-)]	ENSDART00000108960	FAM131A	Zv9_NA490	-	6729	20370	7249	20344	6	6729,12998,18189,18264,18304,20274,	7746,13130,18262,18303,18372,20370,
[ENSDART00000110493 ME1 (2 of 2) Zv9_NA491:21742-38113 (+)]	ENSDART00000110493	ME1 (2 of 2)	Zv9_NA491	+	21742	37854	21742	37745	8	21742,23543,24023,26485,26681,26909,37347,37531,	21863,23641,24137,26591,26824,27083,37446,37854,
[ENSDART00000129735 PDZRN4 (2 of 2) Zv9_NA498:3524-4533 (+)]	ENSDART00000129735	PDZRN4 (2 of 2)	Zv9_NA498	+	3524	7255	3524	4533	2	3524,4148,	4072,7255,
[ENSDART00000113369 FAM20A (2 of 2) Zv9_NA523:6585-8451 (-)]	ENSDART00000113369	FAM20A (2 of 2)	Zv9_NA523	-	6178	8451	6534	8451	3	6178,6886,8368,	6790,6946,8451,
[ENSDART00000085358 CABZ01117349.1 Zv9_NA534:9485-23414 (-)]	ENSDART00000085358	CABZ01117349.1	Zv9_NA534	-	8735	23414	9485	23414	23	8735,9867,12345,12548,13387,13678,13838,14219,14478,15991,16075,16291,16641,17082,17322,17471,18212,18331,18523,18714,19133,21254,23353,	9574,10006,12447,12672,13503,13753,14050,14254,14489,16052,16194,16345,16734,17243,17377,17552,18258,18415,18611,18769,19262,21349,23414,
[ENSDART00000047811 CABZ01020188.1 Zv9_NA548:4743-22461 (+), NM_001160067 nAChRa6 Zv9_NA548:4764-13371 (+)]	ENSDART00000047811	CABZ01020188.1	Zv9_NA548	+	4743	23264	4743	22461	5	4743,13174,16156,16389,21918,	4933,13369,16243,16499,23264,
[ENSDART00000130220 CABZ01020188.2 Zv9_NA548:23528-28853 (-)]	ENSDART00000130220	CABZ01020188.2	Zv9_NA548	-	23408	28853	23528	28853	3	23408,27156,28766,	23632,27379,28853,
[ENSDART00000127111 CABZ01073388.1 Zv9_NA551:7719-20743 (+)]	ENSDART00000127111	CABZ01073388.1	Zv9_NA551	+	7719	20743	7719	20441	14	7719,8955,9156,10595,10786,12419,12615,13609,13794,17266,17465,18680,19977,20272,	7767,9051,9276,10691,10906,12515,12735,13705,13914,17365,17585,18720,20089,20743,
[ENSDART00000125001 TACO1 (2 of 2) Zv9_NA562:3217-12827 (+)]	ENSDART00000125001	TACO1 (2 of 2)	Zv9_NA562	+	3217	12833	3427	12636	5	3217,5285,7109,7321,12426,	3635,5392,7240,7484,12833,
[ENSDART00000083701 cdk11b Zv9_NA566:197-6332 (+)]	ENSDART00000083701	cdk11b	Zv9_NA566	+	197	6878	197	6332	11	197,560,1058,1233,3221,3406,4835,5342,6239,6399,6646,	410,773,1164,1355,3329,3523,4984,5532,6393,6645,6878,
[ENSDART00000130914 CABZ01026370.1 Zv9_NA566:7720-9892 (-)]	ENSDART00000130914	CABZ01026370.1	Zv9_NA566	-	7720	9892	8367	9892	2	7720,9740,	8542,9892,
[ENSDART00000006960 POLR3D Zv9_NA583:4505-16419 (-)]	ENSDART00000006960	POLR3D	Zv9_NA583	-	4505	16419	4727	15154	9	4505,5978,7674,8439,9916,11574,13921,15007,16242,	4844,6131,7925,8596,10038,11729,13965,15165,16419,
[ENSDART00000057172 CABZ01059923.1 Zv9_NA596:5223-6587 (-)]	ENSDART00000057172	CABZ01059923.1	Zv9_NA596	-	5171	6587	5223	6587	6	5171,5363,5573,5851,6338,6494,	5265,5470,5744,6221,6389,6587,
[ENSDART00000124585 DYX1C1 (1 of 2) Zv9_NA603:3915-14633 (-), ENSDART00000126341 DYX1C1 (1 of 2) Zv9_NA603:3915-14633 (-)]	ENSDART00000126341	DYX1C1 (1 of 2)	Zv9_NA603	-	403	14633	3915	14633	8	403,6026,9792,12242,13144,13672,14396,14611,	4114,7027,10048,12367,13159,13777,14422,14633,
[ENSDART00000111175 CUTA Zv9_NA631:7695-10841 (-)]	ENSDART00000111175	CUTA	Zv9_NA631	-	7568	10841	7695	10841	2	7568,10791,	7795,10841,
[ENSDART00000021208 CABZ01061749.1 Zv9_NA654:4982-114445 (-)]	ENSDART00000021208	CABZ01061749.1	Zv9_NA654	-	3883	114445	4982	114445	26	3883,8626,10793,22267,27219,27430,30011,34818,36948,37090,38570,39720,43772,81819,93569,96634,99852,102881,105107,105502,106902,109591,111590,112012,112468,114232,	5105,8824,10865,22351,27324,27541,30104,34947,36990,37234,38696,39795,43886,81970,93663,96803,100022,102984,105174,105613,107060,109766,111798,112031,112471,114445,
[ENSDART00000059041 h1m Zv9_NA660:14112-19625 (-)]	ENSDART00000059041	h1m	Zv9_NA660	-	14527	19625	14617	19607	5	14527,14953,16370,16569,19486,	14869,14997,16488,16847,19625,
[ENSDART00000112983 SLITRK1 Zv9_NA675:160914-162978 (-)]	ENSDART00000112983	SLITRK1	Zv9_NA675	-	160449	162978	160908	162978	1	160449,	162978,
[NM_001113458 KDM5D Zv9_NA683:835-7591 (+), ENSDART00000088367 KDM5A Zv9_NA683:561-13111 (+)]	ENSDART00000088367	KDM5A	Zv9_NA683	+	561	13535	561	13111	27	561,835,1067,1286,1567,1916,4409,4607,4890,5159,5368,5546,5631,5892,6326,6717,7009,8213,8365,8487,9041,9441,9567,11627,12001,12389,12913,	657,994,1187,1445,1752,2079,4521,4816,5072,5284,5496,5566,5755,6248,6465,6897,7726,8342,8401,8638,9085,9478,9614,11641,12059,12812,13535,
[ENSDART00000122830 USP15 Zv9_NA683:15448-28844 (+)]	ENSDART00000122830	USP15	Zv9_NA683	+	15448	29771	15448	28958	27	15448,15697,16940,17364,17755,18113,18289,18968,19416,19611,20115,20303,20508,21559,21710,21831,23466,24224,25037,25091,25574,25936,26088,26470,26717,27006,28766,	15543,15825,17060,17375,17786,18173,18316,19111,19476,19670,20203,20488,20654,21696,21763,21898,23696,24235,25066,25203,25811,26004,26208,26619,26821,27095,29771,
[NM_001191831 Dcp1a Zv9_NA698:39297-48771 (-), ENSDART00000017567 dcp1a Zv9_NA698:37277-48796 (-)]	ENSDART00000017567	dcp1a	Zv9_NA698	-	37277	48796	38904	48768	10	37277,39297,40117,43011,44888,45138,45594,47139,48321,48633,	38985,39480,40171,43419,44972,45277,45661,47267,48362,48796,
[ENSDART00000113908 BICD2 (1 of 2) Zv9_NA698:64309-88558 (-), NM_001033674 Bicd2 Zv9_NA698:64449-88555 (-)]	NM_001033674	Bicd2	Zv9_NA698	-	56771	88555	64449	88555	11	56771,64390,75708,77620,77938,78028,78485,83743,83917,86859,88405,	58741,64615,75849,77905,77989,78220,78746,83866,84037,87012,88555,
[ENSDART00000079738 HADHB Zv9_NA706:2469-21134 (+), NM_001086608 hadhb Zv9_NA706:3131-20807 (+)]	ENSDART00000079738	HADHB	Zv9_NA706	+	2469	21661	2469	21134	15	2469,2663,3132,5337,5513,6335,7442,9356,10971,11184,12405,13790,14640,20642,21098,	2536,2705,3223,5382,5613,6423,7630,9537,11093,11264,12453,13878,14715,20807,21661,
[ENSDART00000082068 CABZ01111729.1 Zv9_NA715:15625-20854 (-)]	ENSDART00000082068	CABZ01111729.1	Zv9_NA715	-	15625	20854	16528	20854	9	15625,16766,18746,18960,19448,19807,19951,20309,20532,	16677,16950,18843,19361,19627,19863,20095,20451,20854,
[ENSDART00000124366 DNAJC11 (2 of 2) Zv9_NA732:59974-77657 (+), NM_001079115 dnajc11 Zv9_NA732:59980-76426 (+)]	ENSDART00000124366	DNAJC11 (2 of 2)	Zv9_NA732	+	59974	78499	59974	77657	16	59974,61991,64734,64908,66924,67135,67333,69520,70771,72345,72554,72818,72999,76064,76297,77631,	60049,62121,64808,65010,67053,67258,67407,69710,70857,72462,72710,72888,73057,76207,76427,78499,
[ENSDART00000114111 PHF13 Zv9_NA732:87586-96593 (-)]	ENSDART00000114111	PHF13	Zv9_NA732	-	83896	96593	87586	96593	4	83896,89971,90144,96449,	87813,90057,90647,96593,
[ENSDART00000103153 FBXO2 Zv9_NA732:107870-114031 (+)]	ENSDART00000103153	FBXO2	Zv9_NA732	+	107870	113782	108326	113584	6	107870,108297,109545,110039,110228,113449,	107907,108363,109672,110135,110367,113782,
[ENSDART00000125786 CCDC23 Zv9_NA732:124928-125998 (-)]	ENSDART00000125786	CCDC23	Zv9_NA732	-	124928	125998	125517	125998	2	124928,125887,	125604,125998,
[ENSDART00000121896 CABZ01064968.2 Zv9_NA735:21210-29918 (+)]	ENSDART00000121896	CABZ01064968.2	Zv9_NA735	+	21210	30407	21210	30053	7	21210,21619,21803,24259,25266,28401,29844,	21279,21635,22112,24553,25407,28794,30407,
[ENSDART00000103889 CABZ01064972.1 Zv9_NA735:71525-72362 (-)]	ENSDART00000103889	CABZ01064972.1	Zv9_NA735	-	71397	72362	71525	72362	1	71397,	72362,
[ENSDART00000125464 CABZ01064973.2 Zv9_NA735:96543-97323 (-)]	ENSDART00000125464	CABZ01064973.2	Zv9_NA735	-	96337	97323	96543	97323	1	96337,	97323,
[ENSDART00000127160 CABZ01064973.1 Zv9_NA735:109495-119564 (+)]	ENSDART00000127160	CABZ01064973.1	Zv9_NA735	+	109495	117866	109495	117741	4	109495,110402,114226,117622,	109503,110443,114553,117866,
[ENSDART00000112478 MYO9B (2 of 3) Zv9_NA735:120608-170862 (-), NM_001130065 MYO9B Zv9_NA735:122742-170862 (-)]	ENSDART00000112478	MYO9B (2 of 3)	Zv9_NA735	-	120564	170862	120584	170862	44	120564,122756,123888,124986,126721,127487,129341,129527,131874,132800,134110,134314,134448,135866,137110,137589,137636,142694,143565,143695,145632,145797,146119,146760,147138,147391,147839,148052,148290,148738,149326,150313,152270,155836,156394,157593,157793,158013,158204,158408,158634,161738,163109,170761,	120997,122884,124004,125034,126845,127619,129447,129656,132060,132890,134222,134356,134619,135983,137289,137596,137721,142727,143630,143821,145690,146053,146454,146912,147312,147541,147959,148163,148371,148855,149366,150427,152355,156032,156536,157715,157928,158130,158294,158538,158735,161838,163172,170862,
[ENSDART00000129800 FKBP6 (1 of 2) Zv9_NA739:9880-12084 (-), NM_001102209 FKBP6 Zv9_NA739:11175-11881 (-)]	NM_001102209	FKBP6	Zv9_NA739	-	10997	11881	11175	11881	2	10997,11692,	11307,11881,
[ENSDART00000124940 CABZ01076758.1 Zv9_NA747:7990-15266 (-), NM_001006176 CORO7 Zv9_NA747:4452-14883 (-)]	ENSDART00000124940	CABZ01076758.1	Zv9_NA747	-	4012	15266	4362	15266	14	4012,4452,6366,7974,8461,10968,11147,11372,11541,14097,14333,14512,14706,15247,	4371,4539,6458,8110,8578,11058,11289,11458,11646,14240,14420,14621,14882,15266,
[ENSDART00000075636 ABCB11 (3 of 3) Zv9_NA756:13720-25344 (-)]	ENSDART00000075636	ABCB11 (3 of 3)	Zv9_NA756	-	13370	25344	13678	25344	5	13370,15475,21495,23042,25093,	13849,15647,21629,23127,25344,
[ENSDART00000111988 HEATR2 (1 of 2) Zv9_NA758:735-4830 (+), NM_001097038 heatr2 Zv9_NA758:744-12257 (+)]	ENSDART00000111988	HEATR2 (1 of 2)	Zv9_NA758	+	735	4940	735	4857	3	735,3950,4728,	1288,4135,4940,
[ENSDART00000057346 CABZ01080545.1 Zv9_NA774:475-22601 (+), NM_001026275 F33E2.7 Zv9_NA774:949-2162 (+)]	ENSDART00000057346	CABZ01080545.1	Zv9_NA774	+	475	22958	475	22616	20	475,1836,2075,2659,2913,5794,6631,10600,10920,11103,11312,12837,13254,13555,17256,19747,19942,21828,22008,22447,	916,1978,2297,2818,3152,5978,6803,10785,10983,11214,11344,12982,13347,13596,17376,19846,20062,21873,22130,22958,
[ENSDART00000122840 MDGA2 (3 of 3) Zv9_NA78:9452-18758 (+)]	ENSDART00000122840	MDGA2 (3 of 3)	Zv9_NA78	+	9452	19105	9452	18758	4	9452,13288,15407,18669,	9606,13422,15507,19105,
[ENSDART00000055579 PPIC Zv9_NA783:18329-29516 (+), NM_079049 cyp33 Zv9_NA783:19936-22368 (+)]	ENSDART00000055579	PPIC	Zv9_NA783	+	18329	29516	18329	25114	5	18329,19939,20935,22195,24985,	18545,20053,21029,22380,29516,
[ENSDART00000124854 SHROOM3 Zv9_NA784:1599-11645 (+)]	ENSDART00000124854	SHROOM3	Zv9_NA784	+	1599	11645	1599	8514	2	1599,8166,	1719,11645,
[ENSDART00000126385 CABZ01112436.1 Zv9_NA786:407-22627 (+)]	ENSDART00000126385	CABZ01112436.1	Zv9_NA786	+	407	23074	407	22627	6	407,3708,6345,10574,13478,21269,	561,3847,6553,10704,13568,23074,
[NM_134824 CG16995 Zv9_NA807:25552-25663 (+), ENSDART00000097417 im:7150988 Zv9_NA807:23458-25714 (+)]	ENSDART00000097417	im:7150988	Zv9_NA807	+	23458	25872	23458	25714	3	23458,25361,25556,	23678,25439,25872,
[ENSDART00000081490 CABZ01084942.1 Zv9_NA808:17798-23307 (+), NM_001204793 trhr3 Zv9_NA808:17993-21775 (+)]	ENSDART00000081490	CABZ01084942.1	Zv9_NA808	+	17798	23308	17798	21910	2	17798,21553,	18704,23308,
[ENSDART00000121420 SEC14L1 (1 of 2) Zv9_NA811:1141-29747 (+)]	ENSDART00000121420	SEC14L1 (1 of 2)	Zv9_NA811	+	1141	29824	1141	29747	9	1141,17768,22208,22405,25560,26906,27214,27539,29564,	1255,17958,22297,22476,25732,27041,27349,27791,29824,
[ENSDART00000128563 CABZ01073098.2 Zv9_NA816:9890-16922 (+)]	ENSDART00000128563	CABZ01073098.2	Zv9_NA816	+	9890	16948	9890	16922	4	9890,9973,14026,16646,	9893,10081,14122,16948,
[ENSDART00000128899 ERMP1 (2 of 2) Zv9_NA820:1848-14173 (+)]	ENSDART00000128899	ERMP1 (2 of 2)	Zv9_NA820	+	1848	14174	1848	9234	7	1848,2336,3487,4424,4874,5477,9060,	1912,2527,3640,4627,4990,5641,14174,
[ENSDART00000110840 TMEM90B Zv9_NA824:42256-88030 (-)]	ENSDART00000110840	TMEM90B	Zv9_NA824	-	42256	88030	47681	88030	3	42256,77234,87502,	47840,77372,88030,
[ENSDART00000129064 CABZ01017733.1 Zv9_NA828:5048-9608 (-)]	ENSDART00000129064	CABZ01017733.1	Zv9_NA828	-	4553	9608	5003	9608	6	4553,7257,7585,7753,9397,9523,	5719,7286,7628,7779,9431,9608,
[ENSDART00000129410 CABZ01113152.1 Zv9_NA834:19751-41261 (-)]	ENSDART00000129410	CABZ01113152.1	Zv9_NA834	-	19250	41261	19751	41261	2	19250,41108,	20093,41261,
[ENSDART00000122537 LRG1 (3 of 3) Zv9_NA839:7267-10251 (+)]	ENSDART00000122537	LRG1 (3 of 3)	Zv9_NA839	+	7267	11068	7267	10251	2	7267,10074,	7669,11068,
[ENSDART00000113400 CABZ01081747.1 Zv9_NA851:699-1476 (-)]	ENSDART00000113400	CABZ01081747.1	Zv9_NA851	-	233	1476	699	1476	2	233,1459,	922,1476,
[ENSDART00000123337 CABZ01081747.2 Zv9_NA851:4802-10133 (-)]	ENSDART00000123337	CABZ01081747.2	Zv9_NA851	-	4726	10133	4802	10133	2	4726,10006,	5992,10133,
[NM_001165276 zn271 Zv9_NA851:18372-18831 (+), ENSDART00000124847 CABZ01081748.1 Zv9_NA851:16535-18966 (+)]	ENSDART00000124847	CABZ01081748.1	Zv9_NA851	+	16535	19080	16535	18966	2	16535,18214,	16614,19080,
[ENSDART00000079956 CABZ01081749.1 Zv9_NA851:22340-30399 (-)]	ENSDART00000079956	CABZ01081749.1	Zv9_NA851	-	22340	30399	25103	30399	2	22340,30314,	25996,30399,
[ENSDART00000083839 KNDC1 (2 of 2) Zv9_NA856:27300-41615 (+), ENSDART00000129195 KNDC1 (2 of 2) Zv9_NA856:21015-41615 (+)]	ENSDART00000083839	KNDC1 (2 of 2)	Zv9_NA856	+	27300	41743	27300	41615	17	27300,27419,28784,29059,29800,29831,31978,34831,36222,36321,36429,37102,37287,39470,39918,39959,41373,	27341,27530,28917,29236,29813,29849,32010,34978,36305,36337,36496,37149,37364,39522,39930,40116,41743,
[ENSDART00000127134 CZv9_NA868H18orf45 (2 of 2) Zv9_NA868:3117-7794 (-)]	ENSDART00000127134	CZv9_NA868H18orf45 (2 of 2)	Zv9_NA868	-	2974	7794	3117	7794	9	2974,3273,5407,5532,7035,7181,7351,7526,7722,	3167,3322,5459,5558,7113,7263,7429,7573,7794,
[ENSDART00000130523 zgc:174646 Zv9_NA875:9289-10435 (-)]	ENSDART00000130523	zgc:174646	Zv9_NA875	-	9008	10435	9289	10435	1	9008,	10435,
[ENSDART00000053129 snrpf Zv9_NA880:20079-23231 (+)]	ENSDART00000053129	snrpf	Zv9_NA880	+	20079	23231	20079	23065	4	20079,20943,22840,22998,	20082,21069,22911,23231,
[ENSDART00000122804 CABZ01022575.2 Zv9_NA881:2254-3256 (+)]	ENSDART00000122804	CABZ01022575.2	Zv9_NA881	+	2254	3523	2254	3256	3	2254,2978,3200,	2363,3101,3523,
[ENSDART00000130971 ZGPAT (2 of 2) Zv9_NA881:6166-6859 (+)]	ENSDART00000130971	ZGPAT (2 of 2)	Zv9_NA881	+	6166	7064	6166	6859	1	6166,	7064,
[ENSDART00000111160 ptmab Zv9_NA883:34776-37930 (-)]	ENSDART00000111160	ptmab	Zv9_NA883	-	34768	37930	35383	37832	5	34768,35502,35679,35835,37787,	35419,35600,35758,35898,37930,
[ENSDART00000124743 CABZ01038708.1 Zv9_NA885:24293-30205 (-)]	ENSDART00000124743	CABZ01038708.1	Zv9_NA885	-	24171	30205	24293	30205	6	24171,25829,25924,28141,28430,30076,	24411,25843,25954,28215,28527,30205,
[ENSDART00000115315 CABZ01080649.1 Zv9_NA89:1489-3253 (+)]	ENSDART00000115315	CABZ01080649.1	Zv9_NA89	+	1489	3438	1489	3253	4	1489,2558,3037,3246,	1633,2654,3153,3438,
[NM_001098601 SNCAIP Zv9_NA89:13926-28407 (+), ENSDART00000109721 SNCAIP Zv9_NA89:13917-31536 (+)]	ENSDART00000109721	SNCAIP	Zv9_NA89	+	13917	35032	13917	31536	13	13917,14626,17353,18987,22561,24690,25287,28368,28555,28710,29285,30360,30731,	13974,14690,17584,19376,22741,24804,25413,28538,28588,28730,29316,30363,35032,
[ENSDART00000075387 SNX2 Zv9_NA89:53351-87221 (+)]	ENSDART00000075387	SNX2	Zv9_NA89	+	53351	87527	53351	87221	19	53351,58191,64546,67121,67600,67958,68098,68140,68253,68408,68463,68614,70484,72063,73485,76154,85653,85829,87170,	53450,58297,64689,67191,67644,67994,68117,68218,68290,68409,68516,68690,70598,72157,73691,76298,85734,85901,87527,
[ENSDART00000123133 CABZ01047284.1 Zv9_NA892:857-6828 (+)]	ENSDART00000123133	CABZ01047284.1	Zv9_NA892	+	857	7148	857	6828	5	857,1084,5973,6154,6673,	994,1350,6064,6438,7148,
[ENSDART00000019953 cyp1c1 Zv9_NA892:103569-106640 (+)]	ENSDART00000019953	cyp1c1	Zv9_NA892	+	103569	106642	103814	105386	1	103569,	106642,
[NM_001077049 RIIAD1 Zv9_NA896:5512-5726 (-), ENSDART00000122076 RIIAD1 Zv9_NA896:3708-5873 (-)]	NM_001077049	RIIAD1	Zv9_NA896	-	5419	5726	5512	5726	2	5419,5637,	5552,5726,
[ENSDART00000126025 VPRBP Zv9_NA90:99-9559 (+)]	ENSDART00000126025	VPRBP	Zv9_NA90	+	99	10635	99	9559	11	99,282,1773,3092,6602,6979,7333,9088,9356,9436,9494,	182,367,2007,3186,6707,7053,7426,9266,9386,9463,10635,
[ENSDART00000130033 NUP85 (1 of 2) Zv9_NA900:14970-22873 (-)]	ENSDART00000130033	NUP85 (1 of 2)	Zv9_NA900	-	14786	22873	14970	22873	6	14786,17615,18018,19913,20783,22719,	15069,17705,18173,20017,20898,22873,
[ENSDART00000126893 CABZ01061146.1 Zv9_NA902:783-3198 (-)]	ENSDART00000126893	CABZ01061146.1	Zv9_NA902	-	205	3198	783	3198	4	205,211,1194,3168,	211,845,1315,3198,
[ENSDART00000024841 CABZ01061890.1 Zv9_NA903:29241-50744 (-), NM_001044071 Alpm Zv9_NA903:29388-39153 (-)]	ENSDART00000024841	CABZ01061890.1	Zv9_NA903	-	29120	50744	29241	50744	11	29120,33397,35811,36557,36791,38104,38452,38981,47046,47359,50686,	29552,33514,36003,36692,36861,38245,38625,39156,47162,47476,50744,
[ENSDART00000130166 CABZ01066514.1 Zv9_NA905:53855-57427 (-), NM_001104847 xt-ii Zv9_NA905:53564-57421 (-)]	NM_001104847	xt-ii	Zv9_NA905	-	53346	57421	53567	57421	3	53346,55859,57280,	53881,56202,57421,
[ENSDART00000106379 CABZ01066717.2 Zv9_NA906:14284-36610 (+)]	ENSDART00000106379	CABZ01066717.2	Zv9_NA906	+	14284	36793	14284	36610	2	14284,35531,	14627,36793,
[ENSDART00000060939 adamts1 Zv9_NA908:84739-93567 (+), NM_001192325 ADAMTS8 Zv9_NA908:51093-91845 (+)]	ENSDART00000060939	adamts1	Zv9_NA908	+	84739	93567	84739	92598	8	84739,87209,89146,89360,89989,90249,90512,91565,	85313,87550,89279,89818,90176,90428,90688,93567,
[ENSDART00000126923 CYYR1 Zv9_NA908:96331-104731 (+)]	ENSDART00000126923	CYYR1	Zv9_NA908	+	96331	107002	96331	104731	14	96331,98158,98281,98815,103782,104594,104773,104868,105001,105263,105547,106485,106706,106755,	96410,98198,98297,98856,103943,104773,104867,105001,105237,105545,106483,106700,106755,107002,
[ENSDART00000130653 CABZ01067743.1 Zv9_NA910:2271-7992 (-)]	ENSDART00000130653	CABZ01067743.1	Zv9_NA910	-	1879	7992	2271	7992	4	1879,2464,4785,7857,	2360,2507,4872,7992,
[ENSDART00000122027 LEPROTL1 Zv9_NA911:12291-15403 (-)]	ENSDART00000122027	LEPROTL1	Zv9_NA911	-	12291	15403	14188	15403	3	12291,14592,15314,	14305,14779,15403,
[ENSDART00000111254 NADK (1 of 2) Zv9_NA913:1514-10866 (+)]	ENSDART00000111254	NADK (1 of 2)	Zv9_NA913	+	1514	10965	1514	10866	8	1514,2216,3797,6349,7021,8739,9115,10718,	1650,2302,3900,6489,7121,8897,9198,10965,
[ENSDART00000123462 YBEY (2 of 2) Zv9_NA914:2487-6263 (-), NM_001077120 YBEY Zv9_NA914:4852-6041 (-)]	ENSDART00000123462	YBEY (2 of 2)	Zv9_NA914	-	2487	6263	2604	6131	4	2487,3901,4822,5921,	2685,3970,4954,6263,
[NM_032295 SLC37A3 Zv9_NA915:36034-60976 (-), ENSDART00000097192 SLC37A3 Zv9_NA915:25298-67538 (-)]	ENSDART00000097192	SLC37A3	Zv9_NA915	-	24601	67538	25298	67538	15	24601,36061,39826,40058,41301,44422,44639,47341,51719,55044,57764,58292,60220,60853,67449,	25391,36127,39978,40106,41403,44564,44815,47353,51804,55141,57910,58376,60313,60974,67538,
[ENSDART00000113848 zgc:171422 Zv9_NA915:75115-94116 (-)]	ENSDART00000113848	zgc:171422	Zv9_NA915	-	75114	94116	77592	94116	9	75114,80970,84968,86086,86296,88470,89653,91115,94112,	78809,81023,85224,86207,86407,88566,89746,91318,94116,
[ENSDART00000051030 tmem19 Zv9_NA915:107377-114717 (-)]	ENSDART00000051030	tmem19	Zv9_NA915	-	106978	114717	107377	114717	4	106978,107996,110747,114578,	107541,108206,111002,114717,
[ENSDART00000041466 SLC35E2 Zv9_NA917:3899-14023 (-), NM_001192646 SLC35E2B Zv9_NA917:3959-13945 (-)]	ENSDART00000041466	SLC35E2	Zv9_NA917	-	2583	14023	3869	14023	9	2583,7566,9155,9450,9823,9995,12567,12876,13800,	4110,7712,9228,9476,9891,10129,12703,12909,14023,
[ENSDART00000078436 OLFML2A (2 of 2) Zv9_NA921:11159-67168 (-)]	ENSDART00000078436	OLFML2A (2 of 2)	Zv9_NA921	-	11159	67168	15594	67168	8	11159,22604,23730,35987,39334,42187,51476,67042,	16208,22790,23997,36249,39523,42295,51737,67168,
[ENSDART00000020040 PDCL3 Zv9_NA923:2017-8368 (+), ENSDART00000109909 PDCL3 Zv9_NA923:2017-8368 (+)]	ENSDART00000109909	PDCL3	Zv9_NA923	+	2017	10030	2017	8368	12	2017,3537,4083,5799,6203,6430,6720,7069,8219,8378,8863,9976,	2023,3658,4174,5821,6247,6479,6749,7278,8373,8434,8899,10030,
[ENSDART00000111194 nms Zv9_NA923:12371-18613 (-)]	ENSDART00000111194	nms	Zv9_NA923	-	12344	18613	15518	18611	8	12344,15482,15611,15756,15895,16013,16966,18562,	12440,15527,15680,15810,15922,16067,17025,18613,
[ENSDART00000128708 zgc:171497 Zv9_NA926:7706-25586 (-)]	ENSDART00000128708	zgc:171497	Zv9_NA926	-	10933	25586	12720	25586	6	10933,15525,15749,18689,23161,25525,	12735,15644,16103,19013,23479,25586,
[ENSDART00000126717 CABZ01079302.1 Zv9_NA926:33363-42325 (-)]	ENSDART00000126717	CABZ01079302.1	Zv9_NA926	-	32865	42325	33363	42325	6	32865,33911,34066,35303,37238,42273,	33396,33937,34180,35345,37577,42325,
[ENSDART00000127961 FAM116A (2 of 2) Zv9_NA930:1265-20338 (+), NM_001012781 FAM116A Zv9_NA930:1277-12386 (+)]	ENSDART00000127961	FAM116A (2 of 2)	Zv9_NA930	+	1265	20338	1265	12885	11	1265,2909,4676,7604,9728,9916,10077,11547,11682,12208,12753,	1336,3032,4772,7699,9794,9981,10167,11601,11792,12386,20338,
[ENSDART00000128138 DUSP13 (3 of 3) Zv9_NA931:3543-4422 (-)]	ENSDART00000128138	DUSP13 (3 of 3)	Zv9_NA931	-	3140	4422	3543	4422	2	3140,4193,	3761,4422,
[ENSDART00000127257 tmem85 Zv9_NA940:15706-16220 (-)]	ENSDART00000127257	tmem85	Zv9_NA940	-	15511	16220	15706	16220	2	15511,16055,	15742,16220,
[ENSDART00000109944 E2F1 Zv9_NA947:4605-23521 (-)]	ENSDART00000109944	E2F1	Zv9_NA947	-	1470	23521	4605	23521	7	1470,5168,7294,12948,15405,19085,23278,	4853,5382,7404,13112,15625,19188,23521,
[NM_057405 Su(dx) Zv9_NA947:68777-93365 (-), ENSDART00000087334 ITCH (1 of 2) Zv9_NA947:72623-113371 (-)]	NM_057405	Su(dx)	Zv9_NA947	-	68279	93365	68777	93365	11	68279,72638,73031,73557,76078,77111,79949,80394,89479,89855,93287,	68813,72709,73119,73656,76216,77246,80111,80484,89565,89886,93365,
[ENSDART00000126306 CABZ01117603.1 Zv9_NA947:136421-141590 (-)]	ENSDART00000126306	CABZ01117603.1	Zv9_NA947	-	136197	141590	136361	141590	4	136197,137035,138802,141241,	136516,137257,138871,141590,
[NM_001031131 SLC10A7 Zv9_NA947:173820-188236 (+), ENSDART00000023484 SLC10A7 Zv9_NA947:173811-188906 (+)]	ENSDART00000023484	SLC10A7	Zv9_NA947	+	173811	188906	173823	188460	12	173811,175640,177160,178046,178565,178703,182052,184176,185000,185258,188090,188442,	173923,175723,177297,178122,178604,178739,182136,184342,185052,185332,188236,188906,
[ENSDART00000108604 PGBD4 (6 of 7) Zv9_NA95:31652-38297 (-)]	ENSDART00000108604	PGBD4 (6 of 7)	Zv9_NA95	-	31413	38297	31652	38297	6	31413,34289,35730,37605,37776,38204,	31920,35519,35939,37685,38083,38297,
[ENSDART00000114794 CABZ01086642.1 Zv9_NA96:12256-13411 (-)]	ENSDART00000114794	CABZ01086642.1	Zv9_NA96	-	11970	13411	12256	13411	5	11970,12420,12724,13169,13333,	12348,12600,13097,13220,13411,
[ENSDART00000025036 gap43 Zv9_NA963:0-14235 (+)]	ENSDART00000025036	gap43	Zv9_NA963	+	0	14237	101	13865	3	0,10885,13797,	131,11372,14237,
[ENSDART00000074826 HTRA3 (2 of 2) Zv9_NA965:194-3458 (+)]	ENSDART00000074826	HTRA3 (2 of 2)	Zv9_NA965	+	194	3902	194	3464	5	194,1203,2136,2323,3295,	309,1209,2194,2419,3902,
[ENSDART00000113802 SLC12A6 Zv9_NA972:18550-24231 (-)]	ENSDART00000113802	SLC12A6	Zv9_NA972	-	18550	24231	20292	24231	3	18550,23681,24028,	20384,23815,24231,
[ENSDART00000101405 DDAH1 Zv9_NA991:2677-6612 (+), NM_001004924 ddah2 Zv9_NA991:2686-5453 (+)]	ENSDART00000101405	DDAH1	Zv9_NA991	+	2677	7913	2677	6612	9	2677,4675,5378,6507,6634,6662,7447,7579,7823,	2761,4795,5522,6634,6658,7436,7530,7723,7913,
[ENSDART00000112634 CZv9_NA991H1orf52 Zv9_NA991:8686-12326 (+)]	ENSDART00000112634	CZv9_NA991H1orf52	Zv9_NA991	+	8686	12326	8775	11487	4	8686,9501,11329,11908,	9045,9718,11822,12326,
[ENSDART00000113202 WNK2 (2 of 2) Zv9_NA994:131-19741 (+)]	ENSDART00000113202	WNK2 (2 of 2)	Zv9_NA994	+	131	19741	131	15894	12	131,1195,1836,2004,2381,3224,3800,8361,12323,14909,15594,17676,	578,1253,1901,2151,2758,3442,4004,8460,12368,15172,16047,19741,
[ENSDART00000067828 BRPF1 Zv9_NA994:23314-41061 (+), ENSDART00000125388 BRPF1 Zv9_NA994:23314-41061 (+)]	ENSDART00000125388	BRPF1	Zv9_NA994	+	23314	41117	23314	41061	18	23314,27198,28143,28530,28582,29201,30605,31061,31564,32563,32824,35935,36584,36761,37217,37356,38439,40870,	24012,27388,28402,28547,29094,29223,30698,31175,31694,32644,33097,36085,36661,36819,37228,37455,38596,41117,
[ENSDART00000084538 SLCO1B1 Zv9_NA995:75520-80778 (+)]	ENSDART00000084538	SLCO1B1	Zv9_NA995	+	75520	80940	75520	80778	3	75520,75680,80558,	75533,75798,80940,
[ENSDART00000113623 slco1f3 Zv9_NA995:97865-108086 (+)]	ENSDART00000113623	slco1f3	Zv9_NA995	+	97865	108086	98184	107861	13	97865,98101,98391,98577,102834,103540,103834,104069,104358,104618,107337,107494,107689,	97934,98234,98498,98730,102933,103744,103999,104265,104524,104803,107402,107612,108086,
[ENSDART00000051754 slco1f2 Zv9_NA995:129990-141483 (+)]	ENSDART00000051754	slco1f2	Zv9_NA995	+	129990	141341	129990	139774	13	129990,130162,133995,134277,134466,134712,138013,138306,138550,138832,139092,139464,139647,	130053,130304,134128,134384,134619,134811,138217,138471,138746,138998,139277,139529,141341,
[NM_001023463 snf22 Zv9_NA996:104-3894 (+), ENSDART00000003698 SMARCA4 (1 of 2) Zv9_NA996:104-10087 (+), NM_001131236 SMARCA2 Zv9_NA996:8661-10580 (+)]	ENSDART00000003698	SMARCA4 (1 of 2)	Zv9_NA996	+	104	11872	104	11446	20	104,318,956,1038,2289,2494,2752,2960,3121,3446,3681,4626,7973,8487,9720,9908,9996,10207,10475,11349,	170,427,958,1281,2403,2602,2839,3001,3287,3611,3909,4692,8186,8765,9758,9927,10099,10309,11272,11872,
[NM_001127246 Akap17a Zv9_NA998:32094-42734 (-), ENSDART00000112327 AKAP17A Zv9_NA998:29586-42920 (-)]	ENSDART00000112327	AKAP17A	Zv9_NA998	-	29586	42920	31848	42920	4	29586,36778,41283,42473,	32265,37052,41432,42920,
[ENSDART00000078058 NCAM2 (1 of 2) Zv9_NA999:6940-79629 (-)]	ENSDART00000078058	NCAM2 (1 of 2)	Zv9_NA999	-	6352	79629	6940	79629	25	6352,9580,13625,18137,18541,19108,22928,23200,25991,27967,28455,28606,28929,29020,29145,29708,30710,39702,47705,49170,54114,60022,63609,72273,79592,	7055,9700,13833,18312,18663,19228,22932,23206,26019,27981,28488,28612,28951,29054,29175,29805,30898,39853,47851,49340,54232,60160,63753,72480,79629,
[ENSDART00000130646 COL21A1 (2 of 2) Zv9_scaffold3454:11422-20714 (+)]	ENSDART00000130646	COL21A1 (2 of 2)	Zv9_scaffold3454	+	11422	23571	11422	20714	5	11422,13768,14638,18202,20526,	11572,13823,14839,18280,23571,
[ENSDART00000019239 bmp5 Zv9_scaffold3454:26980-53287 (+)]	ENSDART00000019239	bmp5	Zv9_scaffold3454	+	26980	53940	26980	53287	12	26980,38209,38424,43864,44202,44247,44388,44587,46677,51106,51261,53137,	27443,38402,38455,43889,44232,44260,44399,44626,46875,51183,51372,53940,
[ENSDART00000006922 CTRL (2 of 3) Zv9_scaffold3455:23859-32834 (-)]	ENSDART00000006922	CTRL (2 of 3)	Zv9_scaffold3455	-	23695	32834	23859	32834	7	23695,25808,29399,30388,30585,30753,32788,	24021,25939,29580,30470,30665,30854,32834,
[ENSDART00000019920 aplp Zv9_scaffold3455:137386-148097 (-)]	ENSDART00000019920	aplp	Zv9_scaffold3455	-	134481	148097	137810	148095	11	134481,139364,141190,142232,142382,143913,144162,144530,144981,147894,148053,	137909,139508,141256,142300,142406,144081,144262,144659,145140,147969,148097,
[ENSDART00000085942 CU915738.1 Zv9_scaffold3455:260996-341128 (+)]	ENSDART00000085942	CU915738.1	Zv9_scaffold3455	+	260996	341128	260996	338025	20	260996,292033,292553,297918,300393,304193,307891,311974,312310,312866,315101,315426,317362,318980,321137,324133,332063,334918,337863,339048,	261020,292181,292717,297989,300566,304229,308120,312111,312414,312976,315232,315531,317470,319094,321257,324314,332335,335055,338565,341128,
[ENSDART00000045399 kirrel3l Zv9_scaffold3455:348775-398477 (-), ENSDART00000113050 kirrel3l Zv9_scaffold3455:348775-423355 (-), ENSDART00000125405 kirrel3l Zv9_scaffold3455:348775-378693 (-)]	ENSDART00000113050	kirrel3l	Zv9_scaffold3455	-	347724	423355	349134	422726	15	347724,351366,353314,353633,358329,361501,362148,364548,365363,365716,366230,371690,375907,377349,422686,	349632,351456,353424,353741,358528,361602,362275,364676,365512,365822,366381,371848,376057,377502,423355,
[ENSDART00000115055 SPAG16 Zv9_scaffold3460:103-1963 (-), NM_001134728 Spag16 Zv9_scaffold3460:256-700 (-)]	NM_001134728	Spag16	Zv9_scaffold3460	-	129	700	256	700	1	129,	700,
[NM_001114366 Al Zv9_scaffold3460:4519-6183 (+), ENSDART00000113329 ARX (2 of 2) Zv9_scaffold3460:3214-7915 (+)]	ENSDART00000113329	ARX (2 of 2)	Zv9_scaffold3460	+	3214	8470	3214	7915	7	3214,3372,4021,4169,5083,6120,7674,	3338,3390,4069,4620,5135,6416,8470,
[NM_001067587 Os08g0161800 Zv9_scaffold3460:54883-55275 (+), ENSDART00000081198 pcyt1bb Zv9_scaffold3460:49290-64545 (+), NM_208639 AGOS_ACL118C Zv9_scaffold3460:58438-58734 (+)]	ENSDART00000081198	pcyt1bb	Zv9_scaffold3460	+	49290	64545	49290	60735	8	49290,54337,54878,55123,58438,58603,58895,60537,	49392,54437,54995,55275,58517,58746,59084,64545,
[NM_001006259 PDK3 Zv9_scaffold3460:66852-89881 (-), ENSDART00000124107 pdk3b Zv9_scaffold3460:66474-89923 (-)]	ENSDART00000124107	pdk3b	Zv9_scaffold3460	-	63694	89923	66474	89923	13	63694,66585,66864,67081,75354,75567,77351,77524,77678,80746,81126,84884,89820,	66497,66601,66996,67195,75468,75669,77428,77602,77768,80931,81198,85026,89923,
[ENSDART00000126637 BX088603.2 Zv9_scaffold3464:46264-62253 (+)]	ENSDART00000126637	BX088603.2	Zv9_scaffold3464	+	46264	62613	46264	62253	10	46264,48499,48778,52715,52961,53575,53839,53901,61572,61707,	48015,48673,48950,52754,53009,53636,53879,54075,61609,62613,
[ENSDART00000123486 CABZ01021450.1 Zv9_scaffold3465:93173-160867 (-), NM_001081065 Zfp707 Zv9_scaffold3465:78418-128681 (-)]	ENSDART00000123486	CABZ01021450.1	Zv9_scaffold3465	-	90655	160867	92996	160867	9	90655,110056,114751,128369,134863,143785,146846,160207,160651,	93564,110708,114767,128964,134874,144430,146858,160639,160867,
[ENSDART00000125705 zgc:152938 Zv9_scaffold3465:197798-207404 (+)]	ENSDART00000125705	zgc:152938	Zv9_scaffold3465	+	197798	208466	197798	207404	12	197798,203033,203328,206977,207431,207494,207609,207617,208069,208077,208117,208198,	197883,203243,203485,207429,207493,207512,207617,208069,208077,208116,208193,208466,
[ENSDART00000045678 FP245465.1 Zv9_scaffold3465:236400-253504 (+)]	ENSDART00000045678	FP245465.1	Zv9_scaffold3465	+	236400	253510	236400	252899	3	236400,240707,251052,	236401,241283,253510,
[ENSDART00000126412 FP245465.4 Zv9_scaffold3465:261781-270523 (-)]	ENSDART00000126412	FP245465.4	Zv9_scaffold3465	-	261585	270523	261775	270523	3	261585,261992,270216,	261903,262265,270523,
[ENSDART00000130816 CABZ01021435.3 Zv9_scaffold3465:333326-356150 (-)]	ENSDART00000130816	CABZ01021435.3	Zv9_scaffold3465	-	333324	356150	336037	356150	8	333324,339700,339824,344024,345001,348254,352719,355998,	336558,339747,339998,344198,345175,348428,354579,356150,
[ENSDART00000129754 CABZ01021433.1 Zv9_scaffold3465:393076-404340 (-)]	ENSDART00000129754	CABZ01021433.1	Zv9_scaffold3465	-	392831	404340	393076	404340	2	392831,404222,	393744,404340,
[ENSDART00000124078 CABZ01021426.1 Zv9_scaffold3465:486285-495751 (-), NM_001012320 ZNF302 Zv9_scaffold3465:486333-491583 (-)]	ENSDART00000124078	CABZ01021426.1	Zv9_scaffold3465	-	486098	495751	486285	495751	3	486098,491156,495666,	486887,491774,495751,
[ENSDART00000125884 CU104716.1 Zv9_scaffold3469:23290-36040 (-)]	ENSDART00000125884	CU104716.1	Zv9_scaffold3469	-	30105	36040	30118	36040	3	30105,30132,35990,	30132,30321,36040,
[ENSDART00000063536 ccbl2 Zv9_scaffold3471:42615-46657 (+)]	ENSDART00000063536	ccbl2	Zv9_scaffold3471	+	42615	46829	42615	46657	13	42615,42773,43130,44546,44793,44963,45251,45454,45741,45904,46207,46374,46600,	42702,42838,43275,44696,44880,45089,45372,45531,45831,46091,46281,46461,46829,
[ENSDART00000113923 PKN2 (2 of 2) Zv9_scaffold3471:94942-164739 (-)]	ENSDART00000113923	PKN2 (2 of 2)	Zv9_scaffold3471	-	94479	164739	95580	164363	22	94479,95878,96138,98869,99095,99262,100315,102845,103103,103370,106782,107228,109212,109389,113342,117927,120227,122214,124424,128937,139667,164342,	95784,95959,96246,99012,99172,99325,100492,102937,103179,103492,106909,107406,109288,109533,113452,118113,120441,122369,124548,129092,139968,164739,
[ENSDART00000103852 CU457778.1 Zv9_scaffold3473:148971-151329 (+)]	ENSDART00000103852	CU457778.1	Zv9_scaffold3473	+	148971	152282	148971	151329	9	148971,149247,149504,149911,150073,150291,150450,150815,151241,	149162,149374,149803,150002,150190,150367,150708,150987,152282,
[ENSDART00000080696 cep72 Zv9_scaffold3474:24325-42020 (+)]	ENSDART00000080696	cep72	Zv9_scaffold3474	+	24325	42020	24331	41817	14	24325,24478,25941,26216,29725,32926,33697,33907,34972,35424,38156,39914,41580,41753,	24404,24606,26134,26331,29898,33000,33734,34030,35097,35518,38335,40041,41674,42020,
[ENSDART00000078125 ST8SIA1 (2 of 2) Zv9_scaffold3477:34484-51415 (-)]	ENSDART00000078125	ST8SIA1 (2 of 2)	Zv9_scaffold3477	-	32191	51415	34484	51040	5	32191,38772,44483,49740,50861,	34977,38865,44593,49885,51415,
[ENSDART00000027494 CU137645.1 Zv9_scaffold3477:86045-90077 (+)]	ENSDART00000027494	CU137645.1	Zv9_scaffold3477	+	86045	90082	86098	89522	8	86045,86396,86509,86657,87719,87947,89130,89420,	86106,86400,86545,86699,87851,88037,89313,90082,
[ENSDART00000112818 B4GALNT3 (2 of 3) Zv9_scaffold3477:119744-136743 (-), NM_173593 B4GALNT3 Zv9_scaffold3477:120013-136532 (-)]	NM_173593	B4GALNT3	Zv9_scaffold3477	-	119878	136532	120013	136532	8	119878,121416,122963,123245,132491,135271,136266,136472,	120098,121540,123051,123317,132558,135273,136353,136532,
[ENSDART00000085100 GAPVD1 (2 of 2) Zv9_scaffold3478:110556-135610 (+)]	ENSDART00000085100	GAPVD1 (2 of 2)	Zv9_scaffold3478	+	110556	129540	110556	129413	6	110556,114774,116888,118955,120614,129202,	110741,115042,117464,119042,120749,129540,
[ENSDART00000125434 CR628395.1 Zv9_scaffold3480:217836-265307 (+)]	ENSDART00000125434	CR628395.1	Zv9_scaffold3480	+	217836	265307	217836	263978	12	217836,218171,218884,230837,231432,231734,253826,254942,256416,263056,263606,263934,	217880,218276,218989,230922,231628,233499,254000,255116,256590,263103,263828,265307,
[ENSDART00000099981 CU207245.1 Zv9_scaffold3482:148542-153877 (+)]	ENSDART00000099981	CU207245.1	Zv9_scaffold3482	+	148542	154129	148542	153931	4	148542,152733,152873,153854,	148627,152843,153303,154129,
[NM_133217 Bco2 Zv9_scaffold3485:35499-44243 (+), ENSDART00000046776 BCMO1 (2 of 2) Zv9_scaffold3485:32005-44716 (+)]	ENSDART00000046776	BCMO1 (2 of 2)	Zv9_scaffold3485	+	32005	44716	32115	44306	11	32005,35500,35711,35934,36166,38671,38987,42711,42897,43352,44148,	32179,35629,35841,36082,36314,38892,39254,42817,42992,43464,44716,
[ENSDART00000105103 bcmo1 Zv9_scaffold3485:64571-82482 (+), NM_204635 BCMO1 Zv9_scaffold3485:64623-75427 (+)]	ENSDART00000105103	bcmo1	Zv9_scaffold3485	+	64571	82482	64602	82368	11	64571,66791,68451,69258,72372,75209,75516,77976,80125,80372,82213,	64666,66920,68581,69406,72514,75430,75768,78079,80220,80484,82482,
[ENSDART00000056858 BOLA3 Zv9_scaffold3485:88975-98522 (+)]	ENSDART00000056858	BOLA3	Zv9_scaffold3485	+	88975	98526	89075	98112	4	88975,89261,91405,98046,	89105,89391,91494,98526,
[ENSDART00000126956 VAT1L Zv9_scaffold3485:101775-166677 (+)]	ENSDART00000126956	VAT1L	Zv9_scaffold3485	+	101775	167073	101775	166677	9	101775,102701,105915,111848,116119,125108,125813,163833,166578,	101984,102831,106131,111991,116226,125164,126008,163917,167073,
[NM_001095165 usp47 Zv9_scaffold3485:190794-255569 (+), ENSDART00000129206 usp47 Zv9_scaffold3485:190589-227559 (+)]	NM_001095165	usp47	Zv9_scaffold3485	+	190794	256228	190794	255569	31	190794,219307,221329,222892,225304,225480,225741,226892,228733,228911,232652,232913,235405,235608,235753,237638,237888,238199,240992,243695,243906,244026,244125,245426,246368,249499,250263,253383,253602,253735,255391,	190833,219412,221392,222967,225405,225622,225823,227039,228830,229064,232772,233030,235483,235660,235872,237741,238096,238309,241084,243817,243999,244043,244434,245600,246449,249615,250330,253519,253646,253863,256228,
[ENSDART00000111046 DKK3 (1 of 2) Zv9_scaffold3485:266551-284328 (-)]	ENSDART00000111046	DKK3 (1 of 2)	Zv9_scaffold3485	-	266291	284328	266590	284299	7	266291,267830,268072,274427,280678,280996,284104,	266678,267987,268217,274520,280756,281122,284328,
[ENSDART00000008337 zgc:153845 Zv9_scaffold3487:159486-160978 (+)]	ENSDART00000008337	zgc:153845	Zv9_scaffold3487	+	159486	160984	159524	160151	1	159486,	160984,
[ENSDART00000053076 PRPSAP1 Zv9_scaffold3487:178384-204959 (-)]	ENSDART00000053076	PRPSAP1	Zv9_scaffold3487	-	178051	204959	178384	204959	11	178051,181262,181491,191307,192810,193135,193325,196533,199757,202271,204876,	178543,181409,181562,191437,192834,193258,193357,196706,199824,202324,204959,
[ENSDART00000130935 CT737138.1 Zv9_scaffold3488:3764-10595 (+)]	ENSDART00000130935	CT737138.1	Zv9_scaffold3488	+	3764	10765	3764	10595	2	3764,10023,	3849,10765,
[ENSDART00000129962 BX324179.3 Zv9_scaffold3488:93956-100340 (+)]	ENSDART00000129962	BX324179.3	Zv9_scaffold3488	+	93956	100750	93956	100340	2	93956,99291,	94041,100750,
[ENSDART00000101501 CU138503.4 Zv9_scaffold3489:6268-6772 (+)]	ENSDART00000101501	CU138503.4	Zv9_scaffold3489	+	6268	7060	6268	6772	1	6268,	7060,
[ENSDART00000007671 SCYL1 (1 of 2) Zv9_scaffold3489:18483-39312 (+)]	ENSDART00000007671	SCYL1 (1 of 2)	Zv9_scaffold3489	+	18483	39328	18483	38663	18	18483,19355,21344,21547,23246,23472,24687,27589,27827,29537,29798,31222,31415,33050,33685,36328,37014,38538,	18591,19496,21467,21768,23337,23628,24846,27697,27941,29693,29987,31298,31610,33163,33766,36661,37093,39328,
[NM_004585 RARRES3 Zv9_scaffold3489:45255-45707 (-), ENSDART00000105403 RARRES3 (2 of 4) Zv9_scaffold3489:43414-48764 (-)]	ENSDART00000105403	RARRES3 (2 of 4)	Zv9_scaffold3489	-	42592	48764	43414	48764	4	42592,45240,45604,48749,	43534,45509,45713,48764,
[ENSDART00000105402 RARRES3 (4 of 4) Zv9_scaffold3489:50131-56511 (-)]	ENSDART00000105402	RARRES3 (4 of 4)	Zv9_scaffold3489	-	50805	56511	50907	56247	5	50805,55397,55770,56238,56494,	50948,55664,55879,56280,56511,
[ENSDART00000109483 INTS5 (2 of 2) Zv9_scaffold3489:60732-64679 (+), NM_001098026 INTS5 Zv9_scaffold3489:61152-63732 (+)]	NM_001098026	INTS5	Zv9_scaffold3489	+	61152	64006	61152	63732	10	61152,61452,61632,61917,62019,62671,62736,62922,63135,63675,	61401,61557,61725,61977,62283,62683,62802,62970,63648,64006,
[ENSDART00000113271 GANAB (2 of 3) Zv9_scaffold3489:65005-100755 (+), NM_001097763 ganab Zv9_scaffold3489:66782-96514 (+)]	ENSDART00000113271	GANAB (2 of 3)	Zv9_scaffold3489	+	65005	100755	65005	99619	24	65005,66887,67379,70419,71966,72921,73211,75043,75224,77757,80916,84495,85382,87453,89936,90104,94062,94515,94779,95569,95727,96463,96678,99494,	65028,66989,67488,70547,72146,72994,73293,75140,75405,77911,81152,84622,85462,87594,90033,90206,94306,94580,94856,95644,95841,96576,96779,100755,
[ENSDART00000123760 ubxn1 Zv9_scaffold3489:132633-143489 (-)]	ENSDART00000123760	ubxn1	Zv9_scaffold3489	-	132607	143489	132907	142929	10	132607,133061,135065,135298,139436,139714,139907,142743,142870,143465,	132948,133239,135188,135350,139628,139787,140020,142797,142933,143489,
[NM_001016882 znf33b Zv9_scaffold3490:144443-145575 (-), ENSDART00000123526 BX664622.1 Zv9_scaffold3490:154676-161401 (-), NM_198494 ZNF642 Zv9_scaffold3490:144440-155219 (-)]	ENSDART00000123526	BX664622.1	Zv9_scaffold3490	-	154248	161401	154676	161401	2	154248,161316,	155740,161401,
[ENSDART00000124681 BX664622.3 Zv9_scaffold3490:168237-174367 (+)]	ENSDART00000124681	BX664622.3	Zv9_scaffold3490	+	168237	174914	168237	174367	2	168237,173153,	168322,174914,
[ENSDART00000124328 LPL (1 of 2) Zv9_scaffold3497:29342-57902 (+), NM_008509 Lpl Zv9_scaffold3497:30097-45536 (+)]	ENSDART00000124328	LPL (1 of 2)	Zv9_scaffold3497	+	29342	57902	29342	53814	10	29342,30086,32933,34824,39019,45294,46568,48156,51565,53648,	29433,30250,33113,34933,39253,45537,46689,48333,51673,57902,
[ENSDART00000131853 CR450840.2 Zv9_scaffold3503:152031-158906 (+), NM_001126839 LOC100145373 Zv9_scaffold3503:151581-159001 (+)]	NM_001126839	LOC100145373	Zv9_scaffold3503	+	151581	158940	152031	158542	3	151581,151966,157662,	151621,152116,158940,
[ENSDART00000138091 ZNF764 Zv9_scaffold3503:364279-411787 (-), NM_001016882 znf33b Zv9_scaffold3503:300080-411307 (-)]	ENSDART00000138091	ZNF764	Zv9_scaffold3503	-	363814	411787	364204	411787	3	363814,365169,410948,	364836,365402,411787,
[ENSDART00000141531 BX324142.4 Zv9_scaffold3503:463116-469433 (+)]	ENSDART00000141531	BX324142.4	Zv9_scaffold3503	+	463116	469581	463116	469499	4	463116,467874,467933,469411,	463201,467921,468766,469581,
[ENSDART00000042737 rab18b Zv9_scaffold3504:8948-22048 (+)]	ENSDART00000042737	rab18b	Zv9_scaffold3504	+	8948	21481	8959	20967	7	8948,11085,11983,12189,12612,17712,20794,	9027,11141,12045,12262,12731,17779,21481,
[ENSDART00000130517 CU138542.4 Zv9_scaffold3506:145972-169531 (-)]	ENSDART00000130517	CU138542.4	Zv9_scaffold3506	-	168245	169531	168673	169531	1	168245,	169531,
[ENSDART00000098229 psmd7 Zv9_scaffold3511:27577-34396 (-), NM_001141146 psd7 Zv9_scaffold3511:28128-34330 (-)]	ENSDART00000098229	psmd7	Zv9_scaffold3511	-	27699	34396	28033	34330	7	27699,30845,31027,31497,31718,33028,34256,	28487,30937,31108,31595,31811,33120,34396,
[ENSDART00000091573 sult4a1 Zv9_scaffold3512:15194-28738 (-)]	ENSDART00000091573	sult4a1	Zv9_scaffold3512	-	15197	28738	17054	28652	7	15197,20120,21836,22010,22816,22973,28483,	17167,20259,21931,22137,22897,23104,28738,
[ENSDART00000064726 zgc:92195 Zv9_scaffold3512:30684-45752 (+), NM_025225 PNPLA3 Zv9_scaffold3512:30765-43065 (+)]	ENSDART00000064726	zgc:92195	Zv9_scaffold3512	+	30684	46050	30774	45377	10	30684,32605,35113,37358,39389,42291,42466,42949,43925,45154,	30961,32653,35298,37424,39599,42352,42667,43082,44033,46050,
[ENSDART00000023846 TTLL12 Zv9_scaffold3512:46745-82380 (+)]	ENSDART00000023846	TTLL12	Zv9_scaffold3512	+	46745	82374	46793	82309	14	46745,47121,48767,50338,64662,64882,69195,70147,72516,74961,78246,78688,79707,82157,	46928,47276,48966,50498,64796,64959,69312,70342,72628,75113,78328,78757,79846,82374,
[ENSDART00000110153 zgc:173714 Zv9_scaffold3514:158371-165432 (-)]	ENSDART00000110153	zgc:173714	Zv9_scaffold3514	-	158371	165432	158990	164965	3	158371,164880,165366,	159985,165028,165432,
[ENSDART00000091728 NTRK3 (2 of 2) Zv9_scaffold3515:11116-273941 (-)]	ENSDART00000091728	NTRK3 (2 of 2)	Zv9_scaffold3515	-	9821	273941	11116	273941	12	9821,13537,32544,42939,47624,192145,255725,255948,261070,271590,271817,273922,	11302,13696,32788,43112,47755,192334,255828,255995,261376,271732,271960,273941,
[ENSDART00000112252 CABZ01079241.1 Zv9_scaffold3516:11868-37339 (-)]	ENSDART00000112252	CABZ01079241.1	Zv9_scaffold3516	-	10374	37339	11859	37339	8	10374,12210,12866,16385,18363,22517,33981,37290,	12102,12821,13166,16526,18495,22649,34131,37339,
[ENSDART00000126599 CZv9_scaffold3516HXorf58 Zv9_scaffold3516:50251-60900 (-)]	ENSDART00000126599	CZv9_scaffold3516HXorf58	Zv9_scaffold3516	-	50181	60900	50251	60900	6	50181,56290,56955,58244,58705,60798,	50425,56381,57146,58353,58800,60900,
[ENSDART00000125194 BX004873.3 Zv9_scaffold3517:133267-150745 (-)]	ENSDART00000125194	BX004873.3	Zv9_scaffold3517	-	133263	150745	134334	150745	2	133263,150660,	135242,150745,
[ENSDART00000034692 zgc:101560 Zv9_scaffold3518:11357-17894 (-)]	ENSDART00000034692	zgc:101560	Zv9_scaffold3518	-	11357	17894	12226	17894	5	11357,12487,14784,17315,17819,	12313,12658,14874,17447,17894,
[ENSDART00000124395 zgc:101560 Zv9_scaffold3518:232509-237916 (-), ENSDART00000104309 zgc:101560 Zv9_scaffold3518:231648-247343 (-)]	ENSDART00000104309	zgc:101560	Zv9_scaffold3518	-	231648	247343	232509	232899	7	231648,232770,234982,237347,237847,240932,247266,	232596,232941,235072,237479,237904,240964,247343,
[ENSDART00000124670 LRRN3 (1 of 2) Zv9_scaffold3518:419702-421823 (+), NM_001099658 LRRN3 Zv9_scaffold3518:419732-421277 (+)]	ENSDART00000124670	LRRN3 (1 of 2)	Zv9_scaffold3518	+	419702	422963	419702	421823	1	419702,	422963,
[ENSDART00000127121 CT025651.1 Zv9_scaffold3519:120723-139063 (-)]	ENSDART00000127121	CT025651.1	Zv9_scaffold3519	-	120229	139063	120723	139063	10	120229,121317,121720,124915,125174,130446,130622,131009,136471,138109,	121247,121364,121894,125089,125348,130608,130922,131403,136484,139063,
[ENSDART00000082893 PXMP4 Zv9_scaffold3522:15597-21328 (+)]	ENSDART00000082893	PXMP4	Zv9_scaffold3522	+	15597	19643	15597	18900	5	15597,16016,16778,18639,19451,	15710,16079,16977,18903,19643,
[ENSDART00000109821 EPB42 Zv9_scaffold3522:24530-41501 (+), NM_004245 TGM5 Zv9_scaffold3522:30646-32939 (+)]	ENSDART00000109821	EPB42	Zv9_scaffold3522	+	24530	41507	24530	41330	15	24530,25950,26495,28328,28519,30658,30951,32833,35244,35565,36835,36988,37979,38510,41179,	24579,26130,26738,28447,28648,30836,31087,32937,35484,35598,36868,37195,38143,38644,41507,
[ENSDART00000064157 vstm2l Zv9_scaffold3522:53493-61807 (+), NM_001016985 vstm2l Zv9_scaffold3522:58952-60678 (+)]	ENSDART00000064157	vstm2l	Zv9_scaffold3522	+	53493	61779	53528	60834	4	53493,58953,59543,60576,	53628,59114,59588,61779,
[ENSDART00000051787 lhb Zv9_scaffold3525:54870-57837 (-)]	ENSDART00000051787	lhb	Zv9_scaffold3525	-	54870	57837	55734	57273	3	54870,57090,57782,	55974,57274,57837,
[NM_001140690 fa36a Zv9_scaffold3525:62078-62352 (+), ENSDART00000026816 FAM36A Zv9_scaffold3525:60107-65009 (+)]	ENSDART00000026816	FAM36A	Zv9_scaffold3525	+	60107	65009	60107	64897	4	60107,62078,62287,64767,	60134,62193,62351,65009,
[ENSDART00000113865 Zv9_scaffold3525:82938-85567 (-)]	ENSDART00000113865		Zv9_scaffold3525	-	82760	85567	82938	85567	3	82760,84736,85177,	83130,84811,85567,
[ENSDART00000129545 BX649556.2 Zv9_scaffold3530:36564-43335 (-)]	ENSDART00000129545	BX649556.2	Zv9_scaffold3530	-	36285	43335	36564	43335	2	36285,43250,	37355,43335,
[ENSDART00000136369 BX649331.2 Zv9_scaffold3530:328203-334513 (+)]	ENSDART00000136369	BX649331.2	Zv9_scaffold3530	+	328203	334654	328203	334537	4	328203,332953,333012,334491,	328288,333000,333845,334654,
[ENSDART00000114257 zgc:174311 Zv9_scaffold3530:380114-385643 (+)]	ENSDART00000114257	zgc:174311	Zv9_scaffold3530	+	380114	385643	380213	384413	2	380114,383406,	380298,385643,
[ENSDART00000148078 CT573263.3 Zv9_scaffold3530:466177-473150 (-), NM_001078504 zf(c2h2)-29 Zv9_scaffold3530:466489-552850 (-)]	ENSDART00000148078	CT573263.3	Zv9_scaffold3530	-	465567	473150	466177	473150	2	465567,473065,	467175,473150,
[ENSDART00000099577 BX908777.1 Zv9_scaffold3530:1324357-1348511 (+)]	ENSDART00000099577	BX908777.1	Zv9_scaffold3530	+	1324357	1348905	1324357	1348511	11	1324357,1324771,1327213,1327724,1329840,1330131,1336133,1336423,1346248,1347249,1347987,	1324401,1324876,1327318,1327809,1330036,1331911,1336307,1336597,1346422,1347296,1348905,
[ENSDART00000126532 CR361561.3 Zv9_scaffold3531:108027-192224 (+)]	ENSDART00000126532	CR361561.3	Zv9_scaffold3531	+	108027	192684	108027	192224	2	108027,190926,	108112,192684,
[ENSDART00000130478 CABZ01061524.1 Zv9_scaffold3535:22211-40366 (+)]	ENSDART00000130478	CABZ01061524.1	Zv9_scaffold3535	+	22211	40528	22211	40378	9	22211,24552,24752,27191,30433,35682,35862,35983,39940,	22307,24640,24791,27297,30597,35719,35885,36039,40528,
[ENSDART00000097148 CSMD1 Zv9_scaffold3535:176396-194510 (-), ENSDART00000059170 CSMD1 Zv9_scaffold3535:176396-231794 (-)]	ENSDART00000059170	CSMD1	Zv9_scaffold3535	-	172561	231794	176396	231794	17	172561,180174,181970,182146,184157,186317,194259,194462,195615,202451,206832,209443,217417,219456,224951,228114,231616,	176556,180307,182058,182259,184322,186497,194371,194536,195789,202625,207012,209620,217600,219630,225140,228288,231794,
[ENSDART00000135491 CU182107.1 Zv9_scaffold3536:148200-153853 (+)]	ENSDART00000135491	CU182107.1	Zv9_scaffold3536	+	148200	154331	148200	153958	2	148200,152963,	148285,154331,
[ENSDART00000110036 zgc:112970 Zv9_scaffold3536:197554-203788 (+)]	ENSDART00000110036	zgc:112970	Zv9_scaffold3536	+	197554	203788	198382	203530	14	197554,198255,200066,200400,200770,200901,201223,201381,201705,202070,202319,202509,203034,203240,	197687,198475,200142,200687,200824,200990,201280,201587,201805,202227,202417,202657,203155,203788,
[ENSDART00000112431 zgc:174680 Zv9_scaffold3536:203601-207814 (-)]	ENSDART00000112431	zgc:174680	Zv9_scaffold3536	-	203601	207814	203749	207695	8	203601,204252,204674,205103,206312,206513,207346,207623,	203959,204526,204785,205195,206358,207196,207373,207814,
[ENSDART00000097949 surf4 Zv9_scaffold3537:3070-25711 (+)]	ENSDART00000097949	surf4	Zv9_scaffold3537	+	3070	25706	3193	25372	6	3070,12315,18060,20763,20878,25105,	3241,12502,18137,20807,21065,25706,
[ENSDART00000126647 CR391997.1 Zv9_scaffold3538:123578-129528 (+)]	ENSDART00000126647	CR391997.1	Zv9_scaffold3538	+	123578	130001	123578	129603	5	123578,128084,128603,129034,129439,	123663,128602,128706,129115,130001,
[ENSDART00000033957 UTP20 Zv9_scaffold3539:191-43587 (+)]	ENSDART00000033957	UTP20	Zv9_scaffold3539	+	191	43757	191	43587	63	191,354,1374,2481,2811,2973,3450,5147,5756,7142,7291,8081,8829,10397,10834,11030,12886,13029,13276,13438,15696,16048,17573,17744,18507,18745,19262,19744,20054,20686,22341,22673,22852,23070,23462,25571,25812,26073,26295,26519,27015,27211,28772,28998,29257,29436,30800,31044,32253,32479,34080,34580,34809,34967,36229,36687,39161,39732,40012,40626,40973,42230,43431,	275,421,1507,2670,2893,3111,3606,5294,5891,7220,7470,8123,8964,10486,10940,11181,12949,13188,13353,13518,15976,16228,17664,17830,18633,18912,19474,19888,20134,20919,22486,22761,22996,23124,23615,25727,25953,26211,26435,26605,27190,27320,28912,29155,29356,29604,30967,31186,32370,32650,34209,34691,34889,35037,36412,36819,39294,39920,40084,40884,41100,42379,43757,
[ENSDART00000021786 arl1 Zv9_scaffold3539:43801-46956 (-)]	ENSDART00000021786	arl1	Zv9_scaffold3539	-	43799	46956	44240	46882	6	43799,44885,45985,46182,46356,46878,	44271,45064,46097,46264,46494,46956,
[ENSDART00000089207 cables1 Zv9_scaffold3540:23856-79366 (-)]	ENSDART00000089207	cables1	Zv9_scaffold3540	-	23856	79366	28914	79366	10	23856,30668,36917,43163,44832,46393,54879,56948,59118,78851,	29055,30876,37024,43267,44986,46499,54957,57041,59190,79366,
[ENSDART00000077947 gata6 Zv9_scaffold3540:164848-174242 (-), ENSDART00000051998 gata6 Zv9_scaffold3540:164848-175324 (-), ENSDART00000051999 gata6 Zv9_scaffold3540:164733-174290 (-)]	ENSDART00000051998	gata6	Zv9_scaffold3540	-	164848	175324	165316	174575	7	164848,166054,166241,169355,171960,173719,174920,	165484,166155,166329,169481,172127,174622,175324,
[ENSDART00000077966 MIB1 (1 of 2) Zv9_scaffold3540:221355-278892 (-)]	ENSDART00000077966	MIB1 (1 of 2)	Zv9_scaffold3540	-	221341	278892	222792	278892	11	221341,224217,224650,231258,233964,235817,236157,242365,244843,248541,278794,	222933,224318,224722,231378,234043,236007,236339,242524,244930,248674,278892,
[NM_001012059 Mcoln3 Zv9_scaffold3544:13134-20618 (-), ENSDART00000023960 MCOLN2 Zv9_scaffold3544:6524-22546 (-)]	ENSDART00000023960	MCOLN2	Zv9_scaffold3544	-	5773	22546	6524	22546	18	5773,9264,9634,10601,10712,10728,11526,13136,13410,15109,15581,15770,17162,17337,17496,20444,20991,22496,	6561,9422,9684,10656,10717,10793,11542,13257,13512,15259,15694,15870,17259,17416,17650,20618,21151,22546,
[ENSDART00000123465 CLCC1 Zv9_scaffold3544:25029-42233 (-)]	ENSDART00000123465	CLCC1	Zv9_scaffold3544	-	24111	42233	25029	42233	10	24111,28565,29279,31340,33112,34104,34322,34626,36688,42056,	25104,29123,29426,31438,33212,34245,34547,34737,36808,42233,
[ENSDART00000128854 CU693480.1 Zv9_scaffold3544:43460-51621 (+)]	ENSDART00000128854	CU693480.1	Zv9_scaffold3544	+	43460	52115	43460	51621	9	43460,44681,44727,45329,45948,46098,48414,51316,51354,	43533,44725,44781,45415,45970,46183,48467,51349,52115,
[ENSDART00000121497 WDR47 (2 of 2) Zv9_scaffold3544:55619-83817 (-), ENSDART00000083218 WDR47 (2 of 2) Zv9_scaffold3544:54951-86322 (-)]	ENSDART00000083218	WDR47 (2 of 2)	Zv9_scaffold3544	-	54946	86322	55619	65386	13	54946,58086,58751,60971,61293,61565,61814,65303,73450,80631,80803,83659,86197,	55762,58305,58883,61142,61463,61733,62042,65473,74232,80716,80887,83853,86322,
[ENSDART00000122783 ZNF251 (12 of 34) Zv9_scaffold3547:244777-258432 (-), NM_181266 Zfp120 Zv9_scaffold3547:241700-246333 (-)]	ENSDART00000122783	ZNF251 (12 of 34)	Zv9_scaffold3547	-	244290	258432	244741	258432	4	244290,245088,245288,258347,	244927,245198,246236,258432,
[ENSDART00000015230 gchfr Zv9_scaffold3548:229916-235080 (-)]	ENSDART00000015230	gchfr	Zv9_scaffold3548	-	229911	235080	230319	235018	3	229911,233653,234982,	230458,233748,235080,
[ENSDART00000124284 CU694219.1 Zv9_scaffold3549:77123-101668 (-)]	ENSDART00000124284	CU694219.1	Zv9_scaffold3549	-	73483	101668	77123	101668	3	73483,97890,101523,	77263,98028,101668,
[ENSDART00000130889 BX005448.2 Zv9_scaffold3552:38476-87907 (+), NM_001101948 ZNF596 Zv9_scaffold3552:41844-87589 (+)]	ENSDART00000130889	BX005448.2	Zv9_scaffold3552	+	38476	87997	38476	87907	4	38476,41680,41741,87171,	38561,41729,42281,87997,
[ENSDART00000112973 PIK3CA (2 of 2) Zv9_scaffold3553:105721-134443 (-)]	ENSDART00000112973	PIK3CA (2 of 2)	Zv9_scaffold3553	-	105576	134443	105721	134443	19	105576,108463,108707,108904,110614,110794,111300,112531,112825,114641,114965,117198,117632,119263,120697,122590,125056,129654,134088,	105992,108618,108825,109075,110693,110919,111407,112703,112929,114888,115090,117333,117785,119369,120783,122836,125307,129864,134443,
[ENSDART00000129781 CR847906.1 Zv9_scaffold3554:105856-128665 (-)]	ENSDART00000129781	CR847906.1	Zv9_scaffold3554	-	104967	128665	105856	128665	7	104967,106811,107685,124614,125324,126035,126917,	106383,106858,107859,124788,125498,126209,128665,
[ENSDART00000109212 zgc:174698 Zv9_scaffold3554:274710-281870 (-)]	ENSDART00000109212	zgc:174698	Zv9_scaffold3554	-	274364	281870	274710	281870	7	274364,275025,275652,276755,277803,278404,281660,	274759,275069,275723,276824,278325,278570,281870,
[ENSDART00000130738 BX465848.3 Zv9_scaffold3555:142608-163453 (-)]	ENSDART00000130738	BX465848.3	Zv9_scaffold3555	-	142370	163453	142608	163453	3	142370,142752,162604,	142691,143527,163453,
[ENSDART00000057730 dbx2 Zv9_scaffold3556:4518-13947 (-)]	ENSDART00000057730	dbx2	Zv9_scaffold3556	-	2436	13947	4518	13947	5	2436,6236,9604,10871,13796,	4692,6421,9652,10904,13947,
[NM_001088521 szl Zv9_scaffold3556:24300-26163 (-), ENSDART00000030667 szl Zv9_scaffold3556:21744-26239 (-)]	ENSDART00000030667	szl	Zv9_scaffold3556	-	21742	26239	22376	26235	4	21742,23509,24245,25936,	22687,23602,24412,26239,
[ENSDART00000108633 RFX7 (2 of 2) Zv9_scaffold3556:51594-53691 (+), NM_001097380 rfx7 Zv9_scaffold3556:44989-53931 (+)]	NM_001097380	rfx7	Zv9_scaffold3556	+	44989	56173	44989	53931	18	44989,48634,48843,49067,49329,50041,50212,50373,51837,52008,52427,52488,52623,52676,52836,52971,53685,53871,	45067,48759,48964,49151,49473,50116,50254,50703,51930,52415,52473,52599,52667,52761,52920,53094,53856,56173,
[ENSDART00000050824 zgc:85843 Zv9_scaffold3557:7492-26638 (-), NM_001127654 Tm6sf2 Zv9_scaffold3557:8152-21225 (-)]	ENSDART00000050824	zgc:85843	Zv9_scaffold3557	-	7488	26638	8080	22030	10	7488,11179,11591,13135,13618,13839,14365,21126,21936,26369,	8290,11299,11684,13237,13743,13922,14469,21224,22040,26638,
[ENSDART00000028357 PIGB Zv9_scaffold3559:19408-37534 (+)]	ENSDART00000028357	PIGB	Zv9_scaffold3559	+	19408	37539	19494	37395	12	19408,21563,22388,25237,25945,26659,28292,30355,31000,32976,36336,37248,	19609,21693,22506,25342,26076,26800,28344,30567,31065,33190,36517,37539,
[ENSDART00000102945 BX510909.4 Zv9_scaffold3560:2374-4794 (+)]	ENSDART00000102945	BX510909.4	Zv9_scaffold3560	+	2374	7808	2374	4794	3	2374,3720,4264,	2535,3767,7808,
[ENSDART00000059404 rab3ip Zv9_scaffold3562:17221-54526 (+)]	ENSDART00000059404	rab3ip	Zv9_scaffold3562	+	17221	54533	17221	54145	10	17221,23809,26761,32196,38615,42342,43670,45218,50842,54065,	17484,23969,26857,32274,38819,42471,43783,45318,50912,54533,
[NM_001102323 C5H12orf28 Zv9_scaffold3562:68376-93619 (+), ENSDART00000059397 CZv9_scaffold3562H12orf28 Zv9_scaffold3562:68376-120468 (+)]	ENSDART00000059397	CZv9_scaffold3562H12orf28	Zv9_scaffold3562	+	68376	120783	68376	120468	25	68376,71095,71258,71648,71866,73702,76740,86441,86592,88711,89898,92538,93299,93490,94318,96781,97726,98976,99432,102512,104742,109107,112658,116817,120381,	68422,71183,71488,71718,71964,73850,76936,86518,86703,88802,90099,92647,93409,93691,94348,96870,97824,99168,99444,102560,104824,109182,112767,116892,120783,
[ENSDART00000043112 CAPN7 Zv9_scaffold3563:162371-191165 (+)]	ENSDART00000043112	CAPN7	Zv9_scaffold3563	+	162371	191107	162663	189312	21	162371,163100,166371,167963,169134,169774,170201,173712,174372,176007,176910,178213,178412,178633,181561,181785,185604,185830,185997,187454,189167,	162765,163209,166529,168031,169341,169861,170328,173798,174466,176154,177017,178334,178557,178733,181697,181861,185750,185893,186128,187547,191107,
[ENSDART00000012414 sh3bp5 Zv9_scaffold3563:195806-232099 (-), NM_001018009 SH3BP5 Zv9_scaffold3563:197348-230486 (-)]	ENSDART00000012414	sh3bp5	Zv9_scaffold3563	-	195806	232099	197159	231941	9	195806,199032,201000,203221,208060,208274,225142,230423,231860,	197371,199329,201220,203264,208191,208439,225271,230486,232099,
[NM_001201216 pl8l1 Zv9_scaffold3563:260952-261614 (+), ENSDART00000128936 MRPS15 Zv9_scaffold3563:240876-261913 (+), NM_001192201 MRPS15 Zv9_scaffold3563:256460-256646 (+)]	ENSDART00000128936	MRPS15	Zv9_scaffold3563	+	240876	259172	240876	259003	8	240876,252237,252384,252621,252811,253006,256460,258889,	241030,252300,252460,252670,252896,253065,256652,259172,
[ENSDART00000113225 OSCP1 (1 of 2) Zv9_scaffold3563:265295-282999 (+), ENSDART00000114729 OSCP1 (1 of 2) Zv9_scaffold3563:265295-282999 (+)]	ENSDART00000114729	OSCP1 (1 of 2)	Zv9_scaffold3563	+	265295	284058	265295	282999	11	265295,270947,271424,274487,274770,277395,278079,278395,278639,281025,282879,	265407,270977,271582,274655,274851,277499,278208,278465,278779,281089,284058,
[ENSDART00000062791 FAM49A (1 of 2) Zv9_scaffold3564:88052-129500 (-)]	ENSDART00000062791	FAM49A (1 of 2)	Zv9_scaffold3564	-	87953	129500	88573	96208	12	87953,88727,88905,90760,92563,92771,92966,93185,94075,96138,102300,129308,	88637,88798,89032,90840,92680,92849,93103,93291,94197,96219,102354,129500,
[NM_001013132 Fbxo16 Zv9_scaffold3564:132737-136756 (-), ENSDART00000099775 FBXO16 (2 of 2) Zv9_scaffold3564:130268-137112 (-)]	ENSDART00000099775	FBXO16 (2 of 2)	Zv9_scaffold3564	-	130275	137112	130711	136753	9	130275,130856,131616,132708,133029,136200,136502,136696,136984,	130740,131085,131695,132953,133194,136407,136538,136838,137112,
[ENSDART00000109479 F7 (2 of 3) chr1:3799-15138 (+)]	ENSDART00000109479	F7 (2 of 3)	chr1	+	3799	15135	3845	13620	9	3799,4645,5177,5532,6246,11049,11239,13072,14304,	3930,4809,5202,5646,6393,11141,11360,13958,15135,
[ENSDART00000013209 f7 chr1:15961-21248 (+)]	ENSDART00000013209	f7	chr1	+	15961	21244	15977	20757	8	15961,16114,16865,16963,17703,18112,18330,20206,	16038,16278,16890,17080,17844,18234,18451,21244,
[ENSDART00000018741 pcid2 chr1:48009-53546 (-)]	ENSDART00000018741	pcid2	chr1	-	48114	53546	48317	52377	15	48114,48664,48867,49155,49453,49773,50087,50357,50607,50762,50902,51883,52161,52341,53475,	48407,48788,48993,49229,49554,49915,50163,50461,50662,50804,50968,51957,52251,52422,53546,
[ENSDART00000060968 adprhl1 chr1:74984-80899 (-)]	ENSDART00000060968	adprhl1	chr1	-	74984	80899	75797	80848	8	74984,75635,76458,76770,77491,77719,79021,80643,	75257,75955,76591,76895,77632,77845,79186,80899,
[ENSDART00000060971 dcun1d2 chr1:82874-89602 (-)]	ENSDART00000060971	dcun1d2	chr1	-	84117	89602	83917	87807	6	84117,85424,86217,86706,87752,89511,	85050,85507,86348,86875,87897,89602,
[ENSDART00000109529 tmco3 chr1:93295-99795 (+)]	ENSDART00000109529	tmco3	chr1	+	93295	100690	93295	99828	14	93295,93978,95662,95912,95997,96153,96395,96626,96705,97067,97353,98197,98764,99684,	93601,94158,95857,95942,96090,96283,96543,96642,96827,97227,97519,98277,98914,100690,
[ENSDART00000081743 grk1a chr1:119766-132829 (+), NM_204695 GRK1 chr1:119940-130445 (+)]	ENSDART00000081743	grk1a	chr1	+	119766	132824	119941	130640	7	119766,126291,127514,128786,129118,129581,130347,	120643,126419,127672,128870,129243,129783,132824,
[NM_001143945 GAS6 chr1:193306-195944 (-), ENSDART00000010092 gas6 chr1:187474-213136 (-)]	ENSDART00000010092	gas6	chr1	-	187475	213136	187917	212889	15	187475,190709,192281,193287,193942,195550,195870,198142,198527,200705,204784,207801,207943,212598,212828,	188069,190917,192424,193456,194107,195740,195989,198264,198653,200825,204907,207864,207968,212759,213136,
[ENSDART00000098627 PROS1 chr1:217982-228857 (-), NM_174438 PROS1 chr1:218511-227133 (-)]	ENSDART00000098627	PROS1	chr1	-	217983	228857	218396	228676	14	217983,218845,219175,220356,220664,222616,223020,223943,224738,225474,225774,226271,226992,228588,	218563,219074,219312,220525,220829,222803,223261,224072,224864,225597,225852,226296,227150,228857,
[ENSDART00000092524 RASA3 chr1:232208-286022 (-)]	ENSDART00000092524	RASA3	chr1	-	230460	286022	232515	285937	24	230460,235003,235974,236249,236613,237113,239879,240033,240509,241237,242709,244043,244189,244631,245281,246234,247075,251877,253620,259834,263386,266471,266998,285882,	232591,235187,236078,236458,236696,237220,239953,240111,240587,241344,242833,244118,244304,244780,245438,246339,247149,251950,253701,259911,263481,266575,267116,286022,
[ENSDART00000112730 TPP2 chr1:293647-318435 (+), NM_001091911 tpp2 chr1:293662-316009 (+)]	ENSDART00000112730	TPP2	chr1	+	293647	318439	293647	316840	29	293647,294863,295663,296438,296704,297265,297778,299766,300346,301329,301691,302825,303502,304228,305050,305593,306097,306409,306946,307819,308282,309833,313376,314152,314793,315295,315936,316420,316750,	293812,294992,295759,296543,296829,297429,297933,299843,300474,301578,301807,302997,303660,304305,305157,305748,306214,306510,307043,307957,308527,309912,313415,314301,314890,315426,316144,316540,318439,
[NM_001010977 METTL21C chr1:321019-321912 (-), NM_001010977 METTL21C chr1:324748-331286 (-), ENSDART00000114831 METTL21C (1 of 2) chr1:318470-332177 (-)]	ENSDART00000114831	METTL21C (1 of 2)	chr1	-	318469	332177	320677	332177	10	318469,321300,321807,324414,326250,327765,328772,331234,331875,332107,	321066,321424,321956,325092,326374,327929,329393,331352,332015,332177,
[ENSDART00000112581 RG9MTD1 chr1:383768-388445 (-), ENSDART00000148162 RG9MTD1 chr1:383768-388459 (-), ENSDART00000060954 RG9MTD1 chr1:382414-386877 (-), ENSDART00000144606 RG9MTD1 chr1:383581-388483 (-)]	ENSDART00000148162	RG9MTD1	chr1	-	383770	388459	383855	386877	5	383770,384372,386197,386764,388289,	384191,384705,386294,386880,388459,
[ENSDART00000081945 TXNL4B chr1:388697-392773 (+), ENSDART00000109083 TXNL4B chr1:388682-392770 (+)]	ENSDART00000081945	TXNL4B	chr1	+	388697	392771	388784	392362	4	388697,390195,392196,392477,	388916,390347,392364,392771,
[ENSDART00000147610 si:ch73-41e3.7 chr1:393549-399130 (-), ENSDART00000121630 si:ch73-41e3.7 chr1:393577-397303 (-)]	ENSDART00000121630	si:ch73-41e3.7	chr1	-	393550	397303	393577	397303	3	393550,395110,396865,	393824,395334,397303,
[ENSDART00000020327 MRPL16 chr1:399084-405632 (+), ENSDART00000102421 MRPL16 chr1:399413-405632 (+)]	ENSDART00000102421	MRPL16	chr1	+	399413	405635	400622	405189	5	399413,400584,401872,403129,404997,	399575,400656,402021,403423,405635,
[ENSDART00000102431 GPR152 chr1:426971-432957 (-)]	ENSDART00000102431	GPR152	chr1	-	424217	432957	426971	432957	2	424217,432928,	428052,432957,
[ENSDART00000059335 GPA33 (1 of 2) chr1:544504-550272 (+)]	ENSDART00000059335	GPA33 (1 of 2)	chr1	+	544504	550272	544504	548936	7	544504,546539,546904,547766,548029,548226,548431,	544547,546709,547118,547931,548146,548359,550272,
[ENSDART00000131042 ildr1a chr1:566148-571141 (+), NM_001096392 ildr1 chr1:566963-568319 (+)]	ENSDART00000131042	ildr1a	chr1	+	566148	571141	566287	570468	8	566148,566919,567395,567907,568172,568430,569608,570429,	566342,567090,567545,568027,568319,568559,570192,571141,
[ENSDART00000059341 C1H11orf73 chr1:576789-579246 (-)]	ENSDART00000059341	C1H11orf73	chr1	-	576789	579246	576944	579131	5	576789,577103,577335,577758,579101,	576999,577222,577487,577996,579246,
[ENSDART00000059345 eed chr1:581650-588152 (-)]	ENSDART00000059345	eed	chr1	-	581650	588152	581732	588144	12	581650,582400,582838,583496,583736,584074,584239,584454,584685,585807,586026,588024,	581859,582474,582997,583602,583870,584166,584321,584580,584751,585900,586179,588152,
[NM_001107095 Nfkbiz chr1:592783-596463 (-), ENSDART00000140496 NFKBIZ chr1:592854-595703 (-)]	ENSDART00000140496	NFKBIZ	chr1	-	592142	595703	592791	595703	9	592142,593013,593255,593467,593690,594324,595199,595483,595658,	592893,593181,593376,593618,593733,594371,595331,595568,595703,
[ENSDART00000036682 cep97 chr1:599607-603993 (-), ENSDART00000128927 cep97 chr1:600016-604250 (-)]	ENSDART00000036682	cep97	chr1	-	599607	603993	600016	603982	11	599607,600552,600842,601577,601789,602312,602647,602844,603026,603458,603945,	600304,600628,601281,601690,601948,602476,602761,602946,603185,603607,603993,
[ENSDART00000019227 rpl24 chr1:604352-609300 (+)]	ENSDART00000019227	rpl24	chr1	+	604352	609337	604352	609300	5	604352,605788,606285,609024,609219,	604430,605899,606422,609088,609337,
[ENSDART00000064142 POU5F1 chr1:634242-640887 (+), ENSDART00000102399 POU5F1 chr1:628782-640887 (+)]	ENSDART00000064142	POU5F1	chr1	+	634242	641936	634242	640887	23	634242,634593,636430,637162,637393,637571,637711,637807,638051,638344,638944,639853,640402,640615,640953,641138,641274,641377,641547,641634,641670,641680,641858,	634261,634679,636580,637271,637473,637620,637742,638016,638106,638630,639026,640130,640488,640950,641138,641274,641377,641547,641632,641664,641676,641735,641936,
[ENSDART00000127601 wu:fj30f06 chr1:642737-644549 (-)]	ENSDART00000127601	wu:fj30f06	chr1	-	642033	644549	642665	644549	5	642033,642794,643293,643850,644464,	642752,643208,643464,643951,644549,
[ENSDART00000038445 cul4a chr1:652430-657335 (+)]	ENSDART00000038445	cul4a	chr1	+	652430	658873	652430	658162	11	652430,652652,653023,654040,654362,655095,655321,656854,657243,657625,658066,	652550,652845,653128,654151,654448,655203,655435,656960,657416,657778,658873,
[ENSDART00000124478 CABZ01113191.1 chr1:667780-682454 (+)]	ENSDART00000124478	CABZ01113191.1	chr1	+	667780	682454	667780	679070	6	667780,669293,672080,675499,678072,678948,	667826,669617,672428,676012,678108,682454,
[ENSDART00000113095 SON chr1:683991-706241 (-)]	ENSDART00000113095	SON	chr1	-	683500	706241	683982	706241	13	683500,684771,685469,687909,698718,701322,701506,701597,703328,704074,704357,705745,705926,	684147,684887,685535,688057,698835,701433,701570,701725,703460,704141,704451,705839,706241,
[ENSDART00000129342 SETDB2 chr1:769341-772993 (+)]	ENSDART00000129342	SETDB2	chr1	+	769341	773193	769341	772993	13	769341,769527,769813,769976,770346,771061,771220,771362,771474,771602,771710,772017,772908,	769357,769641,769891,770070,770994,771117,771331,771463,771490,771663,771882,772106,773193,
[NM_001030329 hist1h2aa chr1:774835-775204 (-), ENSDART00000015372 zgc:56685 chr1:774781-775204 (-)]	ENSDART00000015372	zgc:56685	chr1	-	774715	775204	774781	775204	1	774715,	775204,
[NM_003851 CREG1 chr1:776419-778429 (+), ENSDART00000092502 CREG1 chr1:776250-780068 (+)]	ENSDART00000092502	CREG1	chr1	+	776250	780070	776347	779600	5	776250,778050,778255,779583,779740,	776626,778170,778463,779693,780070,
[NM_001096083 n6amt1 chr1:981461-984702 (+), ENSDART00000051919 N6AMT1 chr1:977846-987211 (+)]	ENSDART00000051919	N6AMT1	chr1	+	977846	987211	981461	986893	8	977846,979476,981447,981751,983293,984615,986498,986765,	977905,979584,981589,981838,983384,984699,986640,987211,
[ENSDART00000073560 gart chr1:989726-1015830 (-)]	ENSDART00000073560	gart	chr1	-	989326	1015830	989726	1015830	29	989326,990846,991390,991619,991775,992512,992687,992847,993648,994254,994467,994512,994662,994803,996821,997423,997724,999425,1001290,1001731,1005143,1007966,1008484,1008515,1009152,1013435,1013749,1014041,1015685,	989924,990859,991408,991694,991785,992654,992743,992918,993805,994306,994501,994554,994732,994956,997073,997622,997834,999520,1001525,1001900,1005229,1008054,1008508,1008617,1009221,1013547,1013924,1014137,1015830,
[ENSDART00000097626 CU896661.2 chr1:1299843-1314361 (+)]	ENSDART00000097626	CU896661.2	chr1	+	1299843	1314360	1299955	1314149	5	1299843,1306749,1308143,1309215,1314117,	1300073,1307136,1308184,1309369,1314360,
[ENSDART00000097629 CLIC6 chr1:1319017-1331666 (-), NM_001009651 Clic2 chr1:1320862-1329376 (-)]	ENSDART00000097629	CLIC6	chr1	-	1317525	1331666	1319017	1331666	6	1317525,1320868,1327030,1327614,1329266,1331597,	1319179,1321050,1327137,1327749,1329376,1331666,
[NM_001089111 atp1a1-b chr1:1446854-1462675 (+), ENSDART00000048828 atp1a1a.4 chr1:1446560-1462945 (+)]	ENSDART00000048828	atp1a1a.4	chr1	+	1446560	1462944	1446635	1462849	22	1446560,1446797,1447003,1450754,1453175,1453373,1455514,1455703,1456053,1456448,1456664,1456948,1457407,1457612,1457847,1458096,1459884,1460681,1460918,1462392,1462581,1462820,	1446647,1446911,1447063,1450958,1453289,1453508,1455632,1455972,1456362,1456583,1456857,1457124,1457544,1457763,1458016,1458251,1460008,1460827,1461049,1462494,1462673,1462944,
[ENSDART00000081047 atp1a1 chr1:1468925-1488350 (+)]	ENSDART00000081047	atp1a1	chr1	+	1468925	1493199	1469130	1488136	22	1468925,1474128,1474336,1474477,1474780,1474984,1475199,1475398,1475746,1477971,1478270,1478539,1478787,1479320,1479891,1480139,1480373,1480843,1481075,1481285,1487694,1488107,	1469142,1474248,1474396,1474681,1474894,1475119,1475317,1475667,1476055,1478106,1478469,1478715,1478924,1479471,1480060,1480294,1480497,1480989,1481206,1481387,1487786,1493199,
[NM_001173048 Atp1a1 chr1:1546462-1552905 (+), ENSDART00000006449 atp1a1a.2 chr1:1546142-1553618 (+)]	ENSDART00000006449	atp1a1a.2	chr1	+	1546142	1553626	1546203	1553519	22	1546142,1546429,1546714,1547505,1548982,1549175,1549561,1549762,1550115,1550536,1550757,1551051,1551363,1551597,1551833,1552080,1552312,1552520,1552815,1553070,1553268,1553490,	1546215,1546540,1546774,1547709,1549096,1549310,1549679,1550031,1550424,1550671,1550950,1551227,1551500,1551748,1552002,1552235,1552436,1552666,1552946,1553172,1553360,1553626,
[NM_133517 Atp12a chr1:1563833-1569645 (+), ENSDART00000103850 atp1a1a.3 chr1:1562079-1572446 (+)]	ENSDART00000103850	atp1a1a.3	chr1	+	1562079	1572445	1562152	1572327	22	1562079,1562300,1563543,1563836,1564246,1564441,1564658,1564870,1565221,1567601,1567812,1568093,1568350,1568564,1568806,1569053,1569292,1569498,1569741,1571870,1572056,1572298,	1562164,1562414,1563603,1564040,1564360,1564576,1564776,1565139,1565530,1567736,1568005,1568269,1568487,1568715,1568975,1569208,1569416,1569644,1569872,1571972,1572148,1572445,
[ENSDART00000110331 PTGFRN (2 of 2) chr1:1704761-1756978 (+)]	ENSDART00000110331	PTGFRN (2 of 2)	chr1	+	1704761	1762344	1704761	1756978	9	1704761,1705856,1713987,1718433,1731816,1734797,1739392,1753404,1756811,	1704807,1706222,1714395,1718802,1732239,1735207,1739501,1753710,1762344,
[NM_053715 Slc5a3 chr1:1781885-1783511 (+), ENSDART00000008332 SLC5A3 (2 of 2) chr1:1781870-1783886 (+)]	ENSDART00000008332	SLC5A3 (2 of 2)	chr1	+	1781870	1786282	1781870	1783886	1	1781870,	1786282,
[NM_207588 Oxgr1 chr1:1805694-1806048 (-), ENSDART00000041936 OXGR1 (2 of 4) chr1:1804832-1808385 (-)]	ENSDART00000041936	OXGR1 (2 of 4)	chr1	-	1801305	1808385	1805097	1806087	2	1801305,1808358,	1806095,1808385,
[ENSDART00000058877 RAP2A (1 of 2) chr1:1979148-1996905 (+), NM_001012572 RAP2C chr1:1979118-1996851 (+)]	ENSDART00000058877	RAP2A (1 of 2)	chr1	+	1979148	2001715	1979151	1996905	2	1979148,1996667,	1979465,2001715,
[ENSDART00000058876 kpnb3 chr1:2017192-2056339 (+), NM_001037817 RANBP6 chr1:2017226-2035861 (+)]	ENSDART00000058876	kpnb3	chr1	+	2017192	2056337	2017232	2055418	26	2017192,2021928,2027481,2028993,2030411,2031017,2032199,2032792,2033474,2035755,2035948,2036152,2037479,2038200,2040081,2040247,2042001,2042814,2043610,2044302,2045298,2045436,2051179,2052728,2053492,2055378,	2017310,2022009,2027674,2029096,2030508,2031122,2032322,2032913,2033562,2035862,2036073,2036242,2037653,2038419,2040165,2040380,2042123,2042911,2043783,2044414,2045354,2045559,2051399,2052957,2053633,2056337,
[ENSDART00000144500 si:ch211-235f1.3 chr1:2088422-2091040 (-)]	ENSDART00000144500	si:ch211-235f1.3	chr1	-	2088361	2091040	2088755	2090961	4	2088361,2089524,2089683,2090877,	2088839,2089584,2089746,2091040,
[ENSDART00000103785 A2LD1 (1 of 3) chr1:2203808-2206121 (-)]	ENSDART00000103785	A2LD1 (1 of 3)	chr1	-	2202962	2206121	2204879	2205338	2	2202962,2206089,	2205377,2206121,
[ENSDART00000055779 A2LD1 (2 of 3) chr1:2206950-2209919 (-), NM_001200559 a2ldb chr1:2208676-2208976 (-)]	ENSDART00000055779	A2LD1 (2 of 3)	chr1	-	2206950	2209919	2208388	2208964	2	2206950,2209850,	2209055,2209919,
[NM_001162290 LOC100167721 chr1:2212265-2212526 (-), ENSDART00000103795 A2LD1 (3 of 3) chr1:2210926-2214312 (-)]	ENSDART00000103795	A2LD1 (3 of 3)	chr1	-	2210932	2214312	2212106	2214255	2	2210932,2214228,	2212565,2214312,
[ENSDART00000052423 spry2 chr1:4171020-4174337 (+)]	ENSDART00000052423	spry2	chr1	+	4171020	4175015	4173252	4174158	2	4171020,4173201,	4171395,4175015,
[ENSDART00000103724 NDFIP2 chr1:4243642-4283906 (-)]	ENSDART00000103724	NDFIP2	chr1	-	4243643	4283906	4252724	4283701	8	4243643,4252722,4254475,4254909,4258543,4264427,4268079,4283665,	4248157,4252828,4254542,4255034,4258631,4264558,4268242,4283906,
[ENSDART00000040204 tuba8l2 chr1:4291629-4308270 (+)]	ENSDART00000040204	tuba8l2	chr1	+	4291629	4308270	4291834	4308209	4	4291629,4303433,4304993,4307234,	4291837,4303656,4305142,4308270,
[ENSDART00000040368 hlxb9lb chr1:4339023-4344652 (-), ENSDART00000114035 hlxb9lb chr1:4338930-4344656 (-)]	ENSDART00000040368	hlxb9lb	chr1	-	4336374	4344652	4339032	4344593	3	4336374,4341596,4344163,	4339404,4341757,4344652,
[ENSDART00000022307 atic chr1:4374952-4393284 (+)]	ENSDART00000022307	atic	chr1	+	4374952	4393282	4375050	4392678	15	4374952,4376225,4379010,4379536,4381454,4384323,4384549,4386446,4386673,4387628,4388162,4389715,4389888,4391148,4392558,	4375066,4376352,4379154,4379625,4381606,4384480,4384675,4386554,4386759,4387718,4388288,4389808,4390071,4391304,4393282,
[NM_173077 CPO chr1:4469880-4475742 (+), ENSDART00000109756 cpo chr1:4464894-4476319 (+)]	ENSDART00000109756	cpo	chr1	+	4464894	4476312	4464964	4475874	9	4464894,4466864,4467403,4469846,4470634,4470836,4473144,4473443,4475608,	4465023,4466925,4467505,4469951,4470751,4470930,4473347,4473528,4476312,
[ENSDART00000097632 PARD3B (2 of 2) chr1:4670971-4855754 (-)]	ENSDART00000097632	PARD3B (2 of 2)	chr1	-	4670976	4855754	4674700	4855754	20	4670976,4693328,4716435,4729290,4731133,4752007,4758467,4774806,4783657,4785774,4791697,4805306,4812366,4827242,4829126,4835956,4839256,4842069,4855372,4855751,	4675040,4693399,4716544,4729554,4731241,4752191,4758683,4774851,4783770,4785904,4791827,4805480,4812552,4827368,4829266,4836384,4839382,4842156,4855464,4855754,
[ENSDART00000092324 abcb6 chr1:4998835-5022269 (+)]	ENSDART00000092324	abcb6	chr1	+	4998835	5024515	5001255	5022068	20	4998835,5001221,5007856,5008085,5010138,5010320,5012059,5013513,5013730,5015514,5015939,5016121,5016268,5016859,5017039,5018002,5018589,5020599,5021735,5021908,	4998994,5001771,5007994,5008275,5010231,5010513,5012181,5013623,5013796,5015640,5016016,5016185,5016354,5016917,5017144,5018177,5018702,5020694,5021804,5024515,
[NM_001039307 CNPPD1 chr1:5025791-5031141 (+), ENSDART00000037036 cnppd1 chr1:5025589-5033477 (+)]	ENSDART00000037036	cnppd1	chr1	+	5025589	5033475	5025749	5032515	8	5025589,5026546,5028799,5028971,5030084,5030312,5031035,5031909,	5025812,5026649,5028881,5029092,5030213,5030374,5031153,5033475,
[ENSDART00000146473 fam134a chr1:5070609-5074378 (+), ENSDART00000092277 fam134a chr1:5053608-5074378 (+)]	ENSDART00000146473	fam134a	chr1	+	5070609	5078610	5070609	5073892	3	5070609,5073191,5077249,	5070720,5077130,5078610,
[ENSDART00000103710 MDH1B chr1:5082383-5088944 (-), ENSDART00000141653 MDH1B chr1:5082291-5088945 (-)]	ENSDART00000103710	MDH1B	chr1	-	5082379	5088944	5082447	5088925	10	5082379,5082643,5084114,5084516,5085193,5085527,5085774,5087899,5088261,5088903,	5082489,5082783,5084290,5084658,5085455,5085696,5085917,5088034,5088374,5088944,
[ENSDART00000127329 gtf3c3 chr1:5125554-5136072 (+), NM_001006515 GTF3C3 chr1:5107775-5135687 (+)]	ENSDART00000127329	gtf3c3	chr1	+	5125554	5136072	5125554	5135995	7	5125554,5126902,5129002,5130297,5133142,5135543,5135872,	5125605,5127038,5129228,5130488,5133267,5135696,5136072,
[NM_172655 Hecw2 chr1:5170268-5192541 (+), ENSDART00000090286 HECW2 (1 of 2) chr1:5170256-5228525 (+)]	ENSDART00000090286	HECW2 (1 of 2)	chr1	+	5170256	5232188	5170256	5228525	34	5170256,5180571,5181117,5187438,5190115,5192409,5192860,5195540,5196366,5197348,5197470,5197640,5197814,5197922,5200301,5200535,5202425,5203155,5205403,5208381,5213119,5213818,5213994,5214595,5218556,5218756,5219698,5220424,5220609,5221316,5222978,5225581,5227242,5228413,	5170575,5180685,5181212,5187514,5190285,5192552,5192961,5196241,5196482,5197391,5197537,5197679,5197828,5198238,5200403,5200686,5202535,5203280,5205589,5208516,5213219,5213915,5214078,5214705,5218677,5218870,5219851,5220523,5220739,5221463,5223093,5225667,5227355,5232188,
[ENSDART00000109356 klf7 chr1:5266775-5357592 (-)]	ENSDART00000109356	klf7	chr1	-	5261411	5357592	5268628	5357363	4	5261411,5279322,5292436,5357261,	5268680,5279446,5293019,5357592,
[ENSDART00000103696 si:ch211-93g23.2 chr1:5503612-5509565 (+), ENSDART00000147638 si:ch211-93g23.2 chr1:5503644-5509564 (+)]	ENSDART00000147638	si:ch211-93g23.2	chr1	+	5503644	5509559	5503672	5509467	6	5503644,5504393,5506049,5506450,5507754,5509370,	5503783,5504554,5506263,5506554,5507892,5509559,
[ENSDART00000138919 UBE2F chr1:5509823-5526029 (+), ENSDART00000103701 UBE2F chr1:5509779-5527331 (+), ENSDART00000144641 UBE2F chr1:5509736-5526134 (+)]	ENSDART00000103701	UBE2F	chr1	+	5509779	5527329	5511936	5525910	11	5509779,5511612,5511904,5516739,5518361,5520696,5522258,5522434,5524406,5524530,5525859,	5509949,5511753,5512054,5516769,5518427,5520764,5522329,5522492,5524439,5524593,5527329,
[ENSDART00000145822 erbb4a chr1:5694954-5802766 (+), ENSDART00000092118 erbb4a chr1:5694954-5803070 (+)]	ENSDART00000092118	erbb4a	chr1	+	5694954	5807921	5694954	5802766	26	5694954,5715670,5738067,5738657,5740586,5742381,5742716,5747329,5748108,5748856,5750672,5753760,5756060,5758344,5761492,5762205,5765539,5765765,5766686,5787340,5788222,5789596,5794509,5794727,5796288,5801924,	5695106,5715857,5738202,5738723,5740705,5742523,5742830,5747456,5748182,5748947,5750872,5753893,5756154,5758499,5761537,5762338,5765662,5765864,5766872,5787496,5788298,5789743,5794607,5794898,5796589,5807921,
[NM_001095593 erbb2 chr1:6298681-6328532 (+), ENSDART00000127426 CU928072.1 chr1:6299147-6332454 (+)]	ENSDART00000127426	CU928072.1	chr1	+	6299147	6340356	6299147	6332454	9	6299147,6304252,6322605,6323518,6324868,6328241,6328418,6330633,6331678,	6299153,6304438,6322761,6323594,6325015,6328339,6328589,6330934,6340356,
[ENSDART00000085203 efnb2b chr1:6398651-6424064 (+)]	ENSDART00000085203	efnb2b	chr1	+	6398651	6426777	6398952	6424006	5	6398651,6408194,6421254,6421693,6423608,	6399065,6408484,6421347,6421804,6426777,
[ENSDART00000110696 mxb chr1:6475662-6484075 (+), NM_204609 MX1 chr1:6475776-6477774 (+)]	ENSDART00000110696	mxb	chr1	+	6475662	6484295	6475746	6484075	12	6475662,6476557,6477193,6477441,6477655,6478743,6478905,6479109,6481103,6482913,6483517,6483850,	6475945,6476695,6477348,6477580,6477854,6478822,6479028,6479251,6481262,6482990,6483766,6484295,
[ENSDART00000110154 RADIL (1 of 2) chr1:6566680-6586364 (+)]	ENSDART00000110154	RADIL (1 of 2)	chr1	+	6566680	6586559	6566680	6586364	9	6566680,6569482,6572636,6574418,6574649,6580788,6582963,6583519,6586264,	6566797,6569747,6572809,6574569,6574840,6581194,6583103,6583659,6586559,
[ENSDART00000016642 eng1b chr1:6750435-6754481 (-)]	ENSDART00000016642	eng1b	chr1	-	6750433	6754481	6750911	6754205	2	6750433,6753700,	6751231,6754481,
[ENSDART00000013264 arglu1b chr1:6760700-6772194 (+)]	ENSDART00000013264	arglu1b	chr1	+	6760700	6771718	6760700	6770935	4	6760700,6763246,6765682,6770770,	6761035,6763472,6765766,6771718,
[ENSDART00000023180 EFNB2 (2 of 3) chr1:6774235-6799314 (+)]	ENSDART00000023180	EFNB2 (2 of 3)	chr1	+	6774235	6801768	6774235	6799314	5	6774235,6783436,6796529,6796969,6798916,	6774348,6783726,6796622,6797080,6801768,
[ENSDART00000130658 CU861653.2 chr1:6833335-6862151 (+), ENSDART00000127356 CU861653.2 chr1:6853649-6862055 (+), ENSDART00000128998 CU861653.2 chr1:6853649-6862151 (+)]	ENSDART00000128998	CU861653.2	chr1	+	6853649	6862275	6853649	6862055	12	6853649,6854483,6855119,6855365,6855579,6856801,6856963,6857167,6859160,6860883,6861497,6861830,	6853848,6854621,6855274,6855504,6855778,6856880,6857086,6857309,6859319,6860960,6861746,6862275,
[ENSDART00000146756 CASKIN1 (3 of 3) chr1:6870158-6880301 (+)]	ENSDART00000146756	CASKIN1 (3 of 3)	chr1	+	6870158	6883416	6870158	6880330	4	6870158,6880199,6882898,6883366,	6870273,6881718,6882983,6883416,
[ENSDART00000140787 CASKIN1 (3 of 3) chr1:6888660-6890971 (+)]	ENSDART00000140787	CASKIN1 (3 of 3)	chr1	+	6888660	6892190	6888660	6890485	2	6888660,6890388,	6888785,6892190,
[ENSDART00000041462 si:dkeyp-9d4.2 chr1:6895148-6897901 (+), ENSDART00000143881 si:dkeyp-9d4.2 chr1:6893922-6897443 (+)]	ENSDART00000041462	si:dkeyp-9d4.2	chr1	+	6895148	6897901	6895148	6897089	7	6895148,6895328,6895743,6896164,6896407,6896735,6896915,	6895185,6895374,6895948,6896311,6896582,6896836,6897901,
[ENSDART00000111461 si:dkey-79f11.5 chr1:6914142-6920405 (+), ENSDART00000133098 si:dkey-79f11.5 chr1:6914083-6920400 (+)]	ENSDART00000111461	si:dkey-79f11.5	chr1	+	6914142	6920405	6914142	6919944	8	6914142,6916018,6916585,6916896,6917148,6919583,6919773,6920028,	6914194,6916052,6916790,6917043,6917320,6919684,6919948,6920405,
[ENSDART00000146090 si:dkey-79f11.10 chr1:6983832-6989556 (+)]	ENSDART00000146090	si:dkey-79f11.10	chr1	+	6983832	6989557	6983832	6989302	7	6983832,6985532,6986463,6986755,6987000,6988959,6989131,	6983963,6985566,6986668,6986902,6987172,6989060,6989557,
[ENSDART00000113289 CASKIN1 (2 of 3) chr1:7049572-7088804 (-)]	ENSDART00000113289	CASKIN1 (2 of 3)	chr1	-	7047871	7088804	7049572	7088804	33	7047871,7050054,7051229,7051383,7051681,7051994,7053316,7053403,7054681,7054770,7055803,7056049,7056555,7056654,7056965,7057426,7057860,7058411,7059700,7059825,7061033,7061456,7071185,7072097,7073771,7074240,7074399,7076420,7078442,7082349,7082882,7084959,7088748,	7049676,7050062,7051301,7051421,7051922,7052073,7053328,7054010,7054720,7055762,7055899,7056119,7056568,7056797,7057067,7057537,7057975,7058506,7059729,7059878,7061043,7061558,7071300,7072119,7073781,7074303,7074508,7076529,7078564,7082445,7083028,7085057,7088804,
[ENSDART00000112160 SLC5A10 chr1:7137598-7190147 (+), NM_001033227 Slc5a10 chr1:7137589-7184499 (+)]	ENSDART00000112160	SLC5A10	chr1	+	7137598	7192250	7137598	7190147	17	7137598,7137746,7138003,7140342,7141958,7145043,7148243,7150474,7155610,7158375,7170769,7170989,7173157,7184295,7186923,7188908,7189950,	7137652,7137761,7138060,7140447,7142018,7145148,7148349,7150555,7155816,7158511,7170877,7171140,7173326,7184511,7187014,7188980,7192250,
[NM_138435 FAM83F chr1:7162074-7167461 (-), ENSDART00000091508 FAM83G (2 of 2) chr1:7155447-7167743 (-)]	ENSDART00000091508	FAM83G (2 of 2)	chr1	-	7155447	7167743	7158543	7167743	6	7155447,7158481,7161075,7164925,7165144,7167284,	7158245,7158549,7162309,7165050,7165312,7167743,
[ENSDART00000081093 zgc:109892 chr1:7192322-7219398 (-), ENSDART00000136654 zgc:109892 chr1:7192319-7219398 (-)]	ENSDART00000081093	zgc:109892	chr1	-	7192322	7219398	7194614	7219132	7	7192322,7193313,7193553,7196229,7211984,7216405,7219054,	7193253,7193523,7194794,7196398,7212104,7216503,7219398,
[ENSDART00000091683 alkbh5 chr1:7584836-7592679 (+), NM_001193988 ALKBH5 chr1:7585205-7587979 (+)]	ENSDART00000091683	alkbh5	chr1	+	7584836	7592678	7585199	7592545	4	7584836,7587679,7587852,7592367,	7585873,7587760,7587978,7592678,
[NM_001191919 Smcr8 chr1:7611198-7613610 (+), ENSDART00000021504 smcr8b chr1:7610781-7616134 (+)]	ENSDART00000021504	smcr8b	chr1	+	7610781	7616155	7611078	7615727	2	7610781,7615309,	7613618,7616155,
[ENSDART00000114613 ptcd1 chr1:7631413-7642543 (-)]	ENSDART00000114613	ptcd1	chr1	-	7631413	7642543	7631548	7642543	8	7631413,7633074,7635345,7635799,7638062,7639802,7640132,7642087,	7631713,7633257,7635462,7636510,7638164,7640021,7640273,7642543,
[ENSDART00000110932 AL928650.4 chr1:7679205-7686562 (+), NM_001193196 SLC29A4 chr1:7679928-7686502 (+)]	ENSDART00000110932	AL928650.4	chr1	+	7679205	7688476	7679205	7686562	10	7679205,7679932,7680197,7680429,7681309,7682621,7683544,7683913,7684252,7686407,	7679329,7680064,7680311,7680558,7681384,7682896,7683677,7684101,7684493,7688476,
[ENSDART00000103644 fbxl18 chr1:7714245-7723025 (-)]	ENSDART00000103644	fbxl18	chr1	-	7714232	7723025	7714543	7722860	5	7714232,7715907,7718758,7722181,7722839,	7714694,7716123,7720335,7722379,7723025,
[ENSDART00000054989 FSCN1 (2 of 2) chr1:7738604-7744286 (+)]	ENSDART00000054989	FSCN1 (2 of 2)	chr1	+	7738604	7746570	7738604	7744286	5	7738604,7740460,7743427,7743634,7744080,	7739454,7740617,7743549,7743805,7746570,
[ENSDART00000091798 abcg2b chr1:7749149-7768053 (-)]	ENSDART00000091798	abcg2b	chr1	-	7749140	7768053	7750157	7768005	17	7749140,7749274,7749640,7750941,7751165,7754781,7755050,7755493,7758213,7758581,7761075,7761784,7762516,7765083,7765685,7765884,7767832,	7749239,7749582,7750305,7750994,7751255,7754936,7755175,7755583,7758365,7758724,7761159,7761936,7762674,7765239,7765803,7765944,7768053,
[ENSDART00000025604 C1H16orf72 (1 of 2) chr1:7770279-7778767 (+)]	ENSDART00000025604	C1H16orf72 (1 of 2)	chr1	+	7770279	7778763	7770434	7777815	4	7770279,7771812,7774679,7777573,	7770630,7771896,7774955,7778763,
[ENSDART00000137900 grin2ab chr1:7841707-7993986 (-), ENSDART00000103652 grin2ab chr1:7839803-7983514 (-)]	ENSDART00000103652	grin2ab	chr1	-	7840307	7983514	7842068	7983514	12	7840307,7844261,7846690,7846978,7849244,7852280,7852516,7853357,7853781,7857589,7886524,7983133,	7843847,7844500,7846878,7847139,7849474,7852406,7852670,7853523,7853984,7857704,7887120,7983514,
[ENSDART00000136198 SOCS1 (2 of 2) chr1:8038707-8042130 (-), ENSDART00000123246 SOCS1 (2 of 2) chr1:8038972-8039554 (-)]	ENSDART00000123246	SOCS1 (2 of 2)	chr1	-	8037098	8039554	8038972	8039554	1	8037098,	8039554,
[ENSDART00000055006 tlr2 chr1:8062221-8064588 (+), ENSDART00000122568 tlr2 chr1:8060151-8064588 (+)]	ENSDART00000055006	tlr2	chr1	+	8062221	8066623	8062221	8064588	1	8062221,	8066623,
[ENSDART00000081337 NDUFAB1 (2 of 2) chr1:8194183-8199549 (-)]	ENSDART00000081337	NDUFAB1 (2 of 2)	chr1	-	8194189	8199549	8194532	8199486	5	8194189,8194517,8197432,8197663,8199327,	8194424,8194624,8197520,8197792,8199549,
[NM_001088853 LOC398404 chr1:8221163-8221472 (+), ENSDART00000046507 zgc:152698 chr1:8221041-8221978 (+)]	ENSDART00000046507	zgc:152698	chr1	+	8221041	8221978	8221136	8221772	1	8221041,	8221978,
[ENSDART00000081343 plk1 chr1:8229224-8237927 (+)]	ENSDART00000081343	plk1	chr1	+	8229224	8237918	8229544	8237497	11	8229224,8230990,8231244,8231523,8232243,8232930,8233163,8233463,8234294,8234530,8237290,	8229910,8231159,8231389,8231617,8232466,8232997,8233264,8233541,8234449,8234713,8237918,
[ENSDART00000055011 PDILT chr1:8311011-8326027 (-)]	ENSDART00000055011	PDILT	chr1	-	8311012	8326027	8311124	8325977	11	8311012,8311385,8313549,8314314,8317254,8319710,8319919,8320582,8322298,8323090,8325811,	8311187,8311475,8313731,8314435,8317452,8319836,8320027,8320720,8322432,8323297,8326027,
[NM_017179 Uncx chr1:8365979-8369524 (+), ENSDART00000055009 uncx4.1 chr1:8366186-8370199 (+)]	ENSDART00000055009	uncx4.1	chr1	+	8366186	8370195	8366345	8369869	3	8366186,8367288,8368894,	8366607,8367464,8370195,
[ENSDART00000110790 CU914772.1 chr1:8577462-8599643 (-), NM_000152 GAA chr1:8586543-8596647 (-)]	ENSDART00000110790	CU914772.1	chr1	-	8575744	8599643	8577462	8599643	19	8575744,8579811,8581506,8584175,8584371,8584767,8586531,8587051,8588327,8588529,8588701,8590121,8591481,8592901,8593097,8596005,8596482,8596788,8599031,	8577525,8579958,8581671,8584274,8584513,8584916,8586683,8587185,8588445,8588614,8588815,8590232,8591613,8593020,8593217,8596102,8596648,8596934,8599643,
[ENSDART00000111131 elfn1 chr1:8784917-8787329 (+)]	ENSDART00000111131	elfn1	chr1	+	8784917	8791537	8784917	8787329	1	8784917,	8791537,
[ENSDART00000103478 mad1l1 chr1:8816884-8934573 (-), ENSDART00000048610 mad1l1 chr1:8816887-8932348 (-), ENSDART00000103479 mad1l1 chr1:8816884-8934573 (-), ENSDART00000147904 mad1l1 chr1:8815453-8934592 (-)]	ENSDART00000048610	mad1l1	chr1	-	8816884	8932348	8817248	8932348	17	8816884,8860264,8869239,8880764,8884380,8884747,8889592,8897067,8909877,8924046,8926985,8927180,8927484,8928638,8929729,8931970,8932201,	8817410,8860455,8869444,8880855,8884472,8884804,8889733,8897212,8909964,8924108,8927100,8927311,8927566,8928763,8929909,8932111,8932348,
[ENSDART00000054848 pmm2 chr1:8936464-8942940 (+)]	ENSDART00000054848	pmm2	chr1	+	8936464	8942922	8936757	8942592	8	8936464,8939167,8939357,8939515,8941426,8941618,8941955,8942487,	8936832,8939279,8939434,8939607,8941526,8941694,8942071,8942922,
[ENSDART00000138630 C1H7orf26 chr1:8949378-8961410 (-), ENSDART00000054843 C1H7orf26 chr1:8949398-8961404 (-)]	ENSDART00000054843	C1H7orf26	chr1	-	8949395	8961404	8949594	8959575	8	8949395,8950981,8951114,8953380,8955991,8956392,8959377,8961313,	8949892,8951021,8951316,8953682,8956157,8956614,8959629,8961404,
[ENSDART00000041849 tmem8a chr1:8992461-9017000 (-), ENSDART00000138726 tmem8a chr1:8995992-9016578 (-)]	ENSDART00000041849	tmem8a	chr1	-	8992461	9017000	8996163	9017000	13	8992461,8996696,9002803,9004289,9004565,9006412,9006623,9007896,9009580,9010581,9012880,9016385,9016939,	8996457,8996813,9002950,9004468,9004705,9006530,9006717,9008225,9009843,9010706,9013091,9016563,9017000,
[ENSDART00000005895 pdia2 chr1:9030572-9040849 (+), ENSDART00000130181 pdia2 chr1:9030610-9040716 (+)]	ENSDART00000130181	pdia2	chr1	+	9030610	9041336	9030610	9040716	12	9030610,9030787,9034405,9034704,9035730,9037139,9037393,9037608,9037888,9038409,9040381,9040650,	9030724,9030857,9034612,9034838,9035868,9037256,9037519,9037806,9038009,9038591,9040465,9041336,
[ENSDART00000111299 si:dkeyp-75b4.8 chr1:9045172-9058104 (+), ENSDART00000132607 si:dkeyp-75b4.8 chr1:9042467-9058198 (+)]	ENSDART00000111299	si:dkeyp-75b4.8	chr1	+	9045172	9058469	9045172	9058104	4	9045172,9045405,9057703,9057995,	9045317,9045510,9057893,9058469,
[ENSDART00000110749 si:dkeyp-75b4.10 chr1:9071017-9076445 (+), ENSDART00000143719 si:dkeyp-75b4.10 chr1:9070894-9076445 (+)]	ENSDART00000110749	si:dkeyp-75b4.10	chr1	+	9071017	9076445	9071017	9076297	5	9071017,9072428,9074276,9076023,9076217,	9071078,9072526,9074411,9076135,9076445,
[ENSDART00000113551 trim2b chr1:9094549-9109197 (+)]	ENSDART00000113551	trim2b	chr1	+	9094549	9111991	9094611	9108392	10	9094549,9096425,9097030,9099265,9102661,9103171,9105256,9105559,9105952,9108239,	9094719,9096577,9097211,9100028,9102765,9103339,9105425,9105630,9106093,9111991,
[ENSDART00000054835 rnf175 chr1:9113527-9124598 (-), ENSDART00000125358 rnf175 chr1:9113527-9124598 (-)]	ENSDART00000125358	rnf175	chr1	-	9113530	9124598	9114003	9124497	9	9113530,9115891,9116227,9116763,9117649,9117908,9120396,9122207,9124476,	9114124,9115993,9116361,9116884,9117757,9118063,9120538,9122245,9124598,
[NM_001205099 Npy2r chr1:9181879-9192514 (-), ENSDART00000080453 NPY2R (1 of 3) chr1:9181786-9192922 (-)]	ENSDART00000080453	NPY2R (1 of 3)	chr1	-	9179467	9192922	9181786	9192922	4	9179467,9181785,9189801,9192287,	9180463,9182116,9189958,9192922,
[ENSDART00000131090 lratb chr1:9250793-9289291 (+), ENSDART00000080576 lratb chr1:9286304-9289291 (+)]	ENSDART00000080576	lratb	chr1	+	9286304	9289291	9286304	9289035	2	9286304,9288882,	9286847,9289291,
[NM_001091928 lrat chr1:9294727-9295126 (+), ENSDART00000114436 LRAT (2 of 2) chr1:9294557-9300000 (+)]	ENSDART00000114436	LRAT (2 of 2)	chr1	+	9294557	9300297	9294625	9299909	2	9294557,9299753,	9295132,9300297,
[NM_001135717 Rbm46 chr1:9305260-9310072 (+), ENSDART00000110698 rbm46 chr1:9303311-9313555 (+)]	ENSDART00000110698	rbm46	chr1	+	9303311	9313550	9305245	9313199	6	9303311,9305201,9306910,9307335,9309314,9313014,	9303411,9305348,9307248,9307465,9310091,9313550,
[ENSDART00000115195 EIF3F chr1:9473156-9480141 (+)]	ENSDART00000115195	EIF3F	chr1	+	9473156	9480143	9473156	9480103	8	9473156,9473447,9474656,9475890,9478412,9478595,9479610,9480025,	9473268,9473518,9474736,9476028,9478504,9478732,9479724,9480143,
[NM_001016218 dnz1 chr1:9481775-9489350 (+), ENSDART00000043881 zgc:77880 chr1:9481713-9491309 (+)]	ENSDART00000043881	zgc:77880	chr1	+	9481713	9491308	9481760	9490537	9	9481713,9482993,9483303,9484909,9487434,9487584,9487820,9489203,9490445,	9481885,9483082,9483377,9485022,9487496,9487705,9487893,9489348,9491308,
[NM_001014233 Tmem55b chr1:9496151-9500390 (+), ENSDART00000029774 TMEM55B (1 of 2) chr1:9494191-9501127 (+)]	ENSDART00000029774	TMEM55B (1 of 2)	chr1	+	9494191	9501134	9494306	9500815	7	9494191,9496116,9498331,9500136,9500336,9500481,9500671,	9494409,9496301,9498438,9500242,9500389,9500572,9501134,
[NM_001078770 frmd7 chr1:9512786-9519103 (-), ENSDART00000109141 FRMD7 (2 of 2) chr1:9506237-9519118 (-)]	ENSDART00000109141	FRMD7 (2 of 2)	chr1	-	9504295	9519118	9506237	9519118	12	9504295,9505372,9507367,9507833,9512787,9513333,9514861,9516269,9516479,9516671,9518002,9519022,	9505176,9507290,9507443,9507902,9512951,9513429,9515009,9516384,9516577,9516750,9518045,9519118,
[NM_001075439 CNPY3 chr1:9646205-9648897 (-), ENSDART00000040116 tnrc5 chr1:9638794-9649733 (-)]	ENSDART00000040116	tnrc5	chr1	-	9638438	9649733	9639502	9649613	6	9638438,9643504,9646205,9647197,9648769,9649513,	9639768,9643622,9646328,9647294,9648896,9649733,
[ENSDART00000103550 zgc:174945 chr1:9812181-9816727 (-)]	ENSDART00000103550	zgc:174945	chr1	-	9812181	9816727	9813819	9816720	3	9812181,9814017,9816647,	9813923,9814347,9816727,
[ENSDART00000103548 CD200 (1 of 5) chr1:9818785-9823408 (-)]	ENSDART00000103548	CD200 (1 of 5)	chr1	-	9818604	9823408	9818785	9823408	5	9818604,9819640,9821351,9822943,9823368,	9818817,9819739,9821657,9823276,9823408,
[ENSDART00000080503 CD200 (2 of 5) chr1:9843550-9845911 (-)]	ENSDART00000080503	CD200 (2 of 5)	chr1	-	9842629	9845911	9843496	9845911	4	9842629,9843831,9845175,9845871,	9843645,9844137,9845511,9845911,
[ENSDART00000054879 BRP44 (2 of 2) chr1:9860144-9875371 (+), NM_001170100 CG9399 chr1:9863696-9868190 (+)]	ENSDART00000054879	BRP44 (2 of 2)	chr1	+	9860144	9875371	9860144	9872435	5	9860144,9863703,9864822,9868113,9872386,	9860292,9863744,9864907,9868225,9875371,
[ENSDART00000139387 atp1b1b chr1:9896396-9915324 (+), ENSDART00000114114 atp1b1b chr1:9896313-9915262 (+)]	ENSDART00000139387	atp1b1b	chr1	+	9896396	9916269	9896396	9913997	6	9896396,9900301,9903861,9912120,9912511,9913736,	9896533,9900430,9904017,9912305,9912595,9916269,
[ENSDART00000147648 CASC5 chr1:10270507-10288356 (-), ENSDART00000102929 CASC5 chr1:10270506-10290582 (-)]	ENSDART00000147648	CASC5	chr1	-	10270506	10288356	10270619	10288356	23	10270506,10273008,10275090,10275378,10275595,10275754,10276397,10277685,10277802,10277986,10280468,10280694,10280892,10281084,10283267,10283441,10283701,10287432,10287662,10287838,10288004,10288160,10288327,	10270716,10273134,10275212,10275488,10275661,10275855,10276502,10277725,10277886,10278074,10280585,10280785,10281008,10281183,10283335,10283550,10287274,10287479,10287703,10287857,10288054,10288246,10288356,
[ENSDART00000109858 C1H15orf23 chr1:10291238-10301481 (+)]	ENSDART00000109858	C1H15orf23	chr1	+	10291238	10301483	10293106	10301030	8	10291238,10293103,10293281,10294160,10294387,10294591,10297398,10300898,	10291314,10293189,10293308,10294260,10294502,10294653,10297473,10301483,
[NM_001095506 chst12 chr1:10787246-10787945 (-), ENSDART00000136093 CHST12 (6 of 7) chr1:10787132-10788026 (-)]	ENSDART00000136093	CHST12 (6 of 7)	chr1	-	10786793	10788026	10787132	10788026	1	10786793,	10788026,
[ENSDART00000131668 CHST12 (7 of 7) chr1:10796395-10797265 (-)]	ENSDART00000131668	CHST12 (7 of 7)	chr1	-	10796056	10797265	10796395	10797265	1	10796056,	10797265,
[ENSDART00000134588 CHST12 (5 of 7) chr1:10807374-10812757 (-)]	ENSDART00000134588	CHST12 (5 of 7)	chr1	-	10807035	10812757	10807374	10808412	2	10807035,10812667,	10808496,10812757,
[ENSDART00000054787 BX569798.1 chr1:10841251-10849905 (+)]	ENSDART00000054787	BX569798.1	chr1	+	10841251	10854732	10841251	10849905	4	10841251,10844763,10845266,10849350,	10841395,10844991,10845317,10854732,
[ENSDART00000090689 BRAT1 chr1:10852001-10870648 (-)]	ENSDART00000090689	BRAT1	chr1	-	10852001	10870648	10852064	10870440	14	10852001,10856165,10856436,10861139,10861337,10863056,10863910,10864095,10864301,10866581,10868332,10868824,10870313,10870585,	10852799,10856335,10856535,10861224,10861411,10863237,10864014,10864172,10864421,10866975,10868480,10868979,10870474,10870648,
[ENSDART00000140329 CHST12 (2 of 7) chr1:10917542-10918718 (+), ENSDART00000115316 CHST12 (2 of 7) chr1:10917509-10918718 (+)]	ENSDART00000140329	CHST12 (2 of 7)	chr1	+	10917542	10918862	10917542	10918718	1	10917542,	10918862,
[ENSDART00000054790 BX569778.1 chr1:10957100-10958420 (-)]	ENSDART00000054790	BX569778.1	chr1	-	10953065	10958420	10957100	10958420	2	10953065,10954188,	10953636,10958420,
[ENSDART00000033361 TTYH3 (2 of 2) chr1:10962666-11031476 (-), ENSDART00000131116 TTYH3 (2 of 2) chr1:10962800-11030729 (-)]	ENSDART00000033361	TTYH3 (2 of 2)	chr1	-	10962668	11031476	10966886	11030720	15	10962668,10969706,10971467,10975774,10979588,10979769,10979946,10984511,10986000,10989869,10990142,10995528,11013157,11030594,11031054,	10967060,10969782,10971647,10975911,10979681,10979862,10980002,10984587,10986073,10989965,10990363,10995640,11013327,11030741,11031476,
[ENSDART00000123431 IQCE chr1:11036566-11059968 (-)]	ENSDART00000123431	IQCE	chr1	-	11035969	11059968	11036865	11059547	21	11035969,11039981,11040356,11043590,11043782,11044316,11045936,11046432,11046709,11049376,11049640,11051091,11051968,11052162,11054988,11055990,11056916,11057795,11058290,11058489,11059496,	11037020,11040076,11040460,11043692,11043899,11044410,11046044,11046623,11046765,11049546,11049681,11051164,11052039,11052213,11055102,11056061,11057051,11057948,11058336,11058534,11059968,
[ENSDART00000080053 TSPAN5 (2 of 3) chr1:11148976-11165736 (+), NM_001078730 tspan5 chr1:11149242-11162776 (+)]	ENSDART00000080053	TSPAN5 (2 of 3)	chr1	+	11148976	11170607	11149245	11164747	9	11148976,11152537,11152676,11157913,11159801,11160202,11161814,11162710,11164734,	11149326,11152588,11152823,11158084,11159927,11160250,11161931,11162772,11170607,
[ENSDART00000079930 mtp chr1:11180887-11184203 (+)]	ENSDART00000079930	mtp	chr1	+	11180887	11184198	11180887	11182110	2	11180887,11181962,	11181060,11184198,
[NM_001141862 xpa chr1:11212935-11220614 (-), ENSDART00000055566 xpa chr1:11192285-11221304 (-)]	ENSDART00000055566	xpa	chr1	-	11191525	11221304	11198769	11220692	9	11191525,11198763,11212998,11215597,11218017,11218412,11220320,11220514,11221226,	11192337,11199648,11213090,11215715,11218183,11218518,11220431,11220699,11221304,
[ENSDART00000103406 PLA2G12A chr1:11225304-11228820 (+), ENSDART00000128845 PLA2G12A chr1:11225368-11229671 (+), ENSDART00000143628 PLA2G12A chr1:11225388-11228181 (+)]	ENSDART00000128845	PLA2G12A	chr1	+	11225368	11229671	11225368	11228050	4	11225368,11225858,11227184,11227931,	11225771,11225935,11227350,11229671,
[ENSDART00000137697 TMEM66 chr1:11231969-11240873 (-), ENSDART00000103403 TMEM66 chr1:11231664-11240875 (-)]	ENSDART00000137697	TMEM66	chr1	-	11231480	11240873	11232187	11240687	6	11231480,11232368,11233818,11235038,11238312,11240614,	11232213,11232460,11233996,11235531,11238491,11240873,
[ENSDART00000103399 TSPAN5 (3 of 3) chr1:11295393-11312678 (-), NM_001200967 tsn17 chr1:11298883-11312383 (-)]	ENSDART00000103399	TSPAN5 (3 of 3)	chr1	-	11290260	11312678	11296378	11312410	9	11290260,11298887,11299728,11301404,11301727,11303567,11308823,11309058,11312329,	11296391,11298949,11299845,11301452,11301853,11303738,11308970,11309109,11312678,
[ENSDART00000126020 SPINK4 chr1:11431512-11434980 (+)]	ENSDART00000126020	SPINK4	chr1	+	11431512	11434980	11431512	11434923	4	11431512,11431773,11434502,11434877,	11431561,11431796,11434615,11434980,
[ENSDART00000111485 TMOD1 chr1:11527848-11554350 (+), NM_001166116 TMOD1 chr1:11527854-11548118 (+)]	ENSDART00000111485	TMOD1	chr1	+	11527848	11556691	11527848	11554155	9	11527848,11533999,11535138,11541953,11543633,11543882,11547643,11547977,11554096,	11527965,11534156,11535258,11542043,11543764,11543990,11547787,11548122,11556691,
[ENSDART00000003825 cplx2l chr1:11559450-11574952 (-), ENSDART00000142122 cplx2l chr1:11559350-11574893 (-), ENSDART00000137463 cplx2l chr1:11559350-11574450 (-), ENSDART00000108526 cplx2l chr1:11559451-11562466 (-), ENSDART00000139336 cplx2l chr1:11559350-11574427 (-)]	ENSDART00000142122	cplx2l	chr1	-	11559350	11574893	11560299	11573897	4	11559350,11562093,11573866,11574475,	11560491,11562272,11573974,11574893,
[ENSDART00000067086 NANS chr1:11631991-11640923 (+)]	ENSDART00000067086	NANS	chr1	+	11631991	11640913	11632097	11640726	6	11631991,11634783,11637107,11637751,11638575,11640516,	11632229,11634999,11637207,11637906,11638842,11640913,
[ENSDART00000067082 clta chr1:11644362-11658061 (+), ENSDART00000144920 clta chr1:11644343-11657548 (+), ENSDART00000138759 clta chr1:11644362-11657751 (+)]	ENSDART00000067082	clta	chr1	+	11644362	11658059	11644450	11657519	7	11644362,11648771,11651067,11651273,11653413,11656284,11657347,	11644637,11648800,11651185,11651385,11653467,11656320,11658059,
[ENSDART00000127838 pcdh18a chr1:12145909-12155872 (-)]	ENSDART00000127838	pcdh18a	chr1	-	12145909	12155872	12146522	12155437	4	12145909,12150071,12152602,12152947,	12147178,12150241,12152658,12155872,
[ENSDART00000111026 CCRN4L (1 of 2) chr1:12832674-12836850 (+)]	ENSDART00000111026	CCRN4L (1 of 2)	chr1	+	12832674	12838477	12832674	12837084	3	12832674,12835978,12836839,	12832942,12836821,12838477,
[ENSDART00000103383 elf2b chr1:12841964-12852898 (-), ENSDART00000011414 elf2b chr1:12841964-12860838 (-)]	ENSDART00000011414	elf2b	chr1	-	12841964	12860838	12843026	12860838	8	12841964,12845529,12845986,12848222,12848408,12848695,12857391,12860763,	12843663,12845877,12846176,12848303,12848585,12848803,12857599,12860838,
[ENSDART00000079716 C1H4orf27 chr1:12905186-12911525 (+)]	ENSDART00000079716	C1H4orf27	chr1	+	12905186	12911525	12905228	12910770	8	12905186,12905881,12906902,12907204,12907423,12907994,12908211,12910635,	12905270,12906056,12907086,12907303,12907574,12908082,12908384,12911525,
[NM_001104063 Ank2 chr1:12962581-13012431 (+), ENSDART00000021693 ANK2 (1 of 2) chr1:12914286-13044995 (+)]	ENSDART00000021693	ANK2 (1 of 2)	chr1	+	12914286	13044995	12914286	13043163	48	12914286,12962584,12968901,12971291,12971563,12974129,12975873,12978777,12981432,12981805,12984644,12984921,12987325,12989476,12989665,12992880,12993323,12993643,12994931,12995151,12996094,12996274,12996470,12999681,13000058,13003494,13003902,13004966,13009596,13010102,13012216,13013854,13014150,13016446,13017730,13017969,13020191,13020322,13021885,13028393,13028554,13028788,13029034,13029343,130…	12914409,12962686,12969000,12971390,12971662,12974315,12975897,12978876,12981531,12981904,12984842,12985020,12987424,12989575,12989863,12992979,12993422,12993841,12995030,12995250,12996193,12996373,12996543,12999805,13000143,13003595,13003938,13005191,13009695,13010257,13012428,13014047,13014247,13016675,13017856,13018092,13020224,13020344,13027651,13028471,13028686,13028929,13029236,13029416,130…
[ENSDART00000044896 camk2d2 chr1:13048223-13118821 (-), ENSDART00000040049 camk2d2 chr1:13048223-13118821 (-)]	ENSDART00000044896	camk2d2	chr1	-	13047217	13118821	13048723	13118560	22	13047217,13051357,13053986,13054395,13056836,13060868,13061284,13063294,13068647,13072750,13075093,13075847,13076052,13076385,13078251,13080466,13080997,13081555,13086503,13086642,13114904,13118498,	13048727,13051586,13054081,13054471,13056857,13060970,13061333,13063339,13068707,13072791,13075136,13075931,13076175,13076480,13078335,13080569,13081070,13081621,13086558,13086702,13114999,13118821,
[ENSDART00000140139 il8 chr1:13137909-13138866 (+), NM_001124362 LOC100136039 chr1:13138190-13138497 (+)]	ENSDART00000140139	il8	chr1	+	13137909	13138866	13138015	13138645	4	13137909,13138191,13138436,13138632,	13138079,13138324,13138523,13138866,
[ENSDART00000079359 CT826376.1 chr1:13141902-13161637 (-)]	ENSDART00000079359	CT826376.1	chr1	-	13141463	13161637	13141902	13161637	21	13141463,13142177,13142367,13142574,13142882,13143050,13144534,13145223,13145517,13145752,13146133,13146385,13149053,13149382,13151525,13151768,13152605,13153800,13154887,13158075,13161308,	13142025,13142261,13142442,13142638,13142960,13143151,13144622,13145318,13145643,13145899,13146184,13146558,13149126,13149467,13151593,13151906,13152695,13153875,13154977,13158691,13161637,
[ENSDART00000090025 WFS1 (1 of 2) chr1:13198594-13222764 (-)]	ENSDART00000090025	WFS1 (1 of 2)	chr1	-	13196652	13222764	13198594	13222764	9	13196652,13206837,13207648,13208826,13210319,13211628,13211935,13216887,13222214,	13199774,13207526,13207786,13208981,13210397,13211802,13212080,13216964,13222764,
[ENSDART00000064468 crmp1 chr1:13233143-13249457 (+), ENSDART00000098095 crmp1 chr1:13228200-13249023 (+)]	ENSDART00000064468	crmp1	chr1	+	13233143	13251877	13233209	13249023	14	13233143,13234109,13236341,13238516,13238970,13239142,13240448,13240618,13242791,13245446,13245666,13247817,13248602,13248931,	13233257,13234198,13236526,13238681,13239032,13239223,13240517,13240739,13242948,13245588,13245837,13247997,13248768,13251877,
[ENSDART00000103346 fip1l1 chr1:13267563-13288426 (+)]	ENSDART00000103346	fip1l1	chr1	+	13267563	13288432	13267766	13288259	17	13267563,13270402,13272123,13272342,13274720,13274901,13275091,13276622,13276895,13280173,13282488,13282779,13283975,13284948,13285163,13287692,13288117,	13267845,13270460,13272238,13272449,13274785,13275009,13275222,13276738,13276949,13280273,13282642,13282806,13284030,13285007,13285344,13287854,13288432,
[ENSDART00000030083 chic2 chr1:13290842-13301180 (+)]	ENSDART00000030083	chic2	chr1	+	13290842	13301181	13290990	13299929	6	13290842,13292198,13293068,13296054,13296187,13299878,	13291121,13292253,13293224,13296111,13296247,13301181,
[NM_001045702 ociad1 chr1:13308478-13310984 (-), ENSDART00000123895 BX530018.2 chr1:13300930-13311472 (-)]	ENSDART00000123895	BX530018.2	chr1	-	13303141	13311472	13303257	13311472	8	13303141,13305697,13307225,13308455,13308674,13310685,13310917,13311418,	13303295,13305856,13307377,13308585,13308722,13310739,13311002,13311472,
[NM_204474 SLC34A2 chr1:13319471-13327035 (+), ENSDART00000024328 slc34a2a chr1:13317178-13327647 (+)]	ENSDART00000024328	slc34a2a	chr1	+	13317178	13327647	13319127	13327180	13	13317178,13319124,13319415,13320114,13320501,13320984,13322930,13323343,13323525,13323729,13324191,13326407,13326628,	13317427,13319188,13319526,13320243,13320645,13321096,13323126,13323439,13323610,13323897,13324308,13326532,13327647,
[ENSDART00000005067 rbpja chr1:13339434-13348758 (+), NM_001090878 rbpj chr1:13339437-13345646 (+)]	ENSDART00000005067	rbpja	chr1	+	13339434	13348758	13339434	13345144	11	13339434,13340246,13340383,13341197,13341458,13341722,13342527,13342827,13343120,13343400,13344801,	13339454,13340285,13340479,13341363,13341633,13341860,13342640,13342968,13343276,13343504,13348758,
[NM_001169117 STIM2 chr1:13353124-13367268 (+), ENSDART00000114097 STIM2 (2 of 2) chr1:13351604-13367292 (+)]	ENSDART00000114097	STIM2 (2 of 2)	chr1	+	13351604	13368342	13351604	13367292	12	13351604,13353107,13357682,13357890,13359475,13359845,13360734,13360990,13362063,13362735,13364409,13365950,	13351725,13353238,13357797,13358002,13359591,13360023,13360912,13361152,13362164,13362974,13364593,13368342,
[ENSDART00000057044 PGBD4 (7 of 7) chr1:13384327-13417763 (-)]	ENSDART00000057044	PGBD4 (7 of 7)	chr1	-	13383777	13417763	13384327	13417763	4	13383777,13411647,13413108,13417487,	13384595,13412877,13413317,13417763,
[ENSDART00000100109 CABZ01063868.1 chr1:13481618-13483218 (-)]	ENSDART00000100109	CABZ01063868.1	chr1	-	13481327	13483218	13481582	13483218	7	13481327,13481776,13482080,13482525,13482689,13483081,13483181,	13481704,13481956,13482453,13482576,13482772,13483147,13483218,
[ENSDART00000111475 BX511256.2 chr1:13865539-13927467 (+), NM_002589 PCDH7 chr1:13865638-13869317 (+)]	ENSDART00000111475	BX511256.2	chr1	+	13865539	13929918	13865539	13927467	6	13865539,13868681,13869123,13924295,13926964,13927265,	13868113,13869093,13869398,13924494,13927154,13929918,
[ENSDART00000109911 HGSNAT chr1:13953061-13983028 (+)]	ENSDART00000109911	HGSNAT	chr1	+	13953061	13983028	13953061	13979982	18	13953061,13954104,13957079,13957356,13959308,13959503,13959810,13960272,13962503,13965957,13966785,13969035,13969609,13972794,13973134,13976015,13976259,13979800,	13953221,13954220,13957213,13957475,13959378,13959573,13959908,13960349,13962534,13966118,13966901,13969157,13969736,13972881,13973212,13976086,13976372,13983028,
[ENSDART00000033018 pi4k2b chr1:13985421-14011929 (+)]	ENSDART00000033018	pi4k2b	chr1	+	13985421	14011626	13985591	14011265	10	13985421,13995364,13996064,13998461,14004051,14004595,14006120,14008725,14009285,14011091,	13985925,13995516,13996265,13998593,14004205,14004660,14006220,14008859,14009345,14011626,
[ENSDART00000109970 DLC1 chr1:14017726-14055663 (-)]	ENSDART00000109970	DLC1	chr1	-	14017726	14055663	14020231	14055663	14	14017726,14021376,14021640,14024069,14029006,14029915,14032842,14036118,14037746,14038467,14041577,14043369,14045704,14055650,	14020328,14021550,14021858,14024282,14029121,14030129,14033050,14036278,14037926,14040044,14041641,14043451,14045776,14055663,
[NM_001108875 Sgcz chr1:14350661-14523900 (-), ENSDART00000130418 SGCZ chr1:14345878-14594464 (-)]	ENSDART00000130418	SGCZ	chr1	-	14345515	14594464	14345878	14594464	9	14345515,14350754,14377323,14408778,14412454,14438998,14491066,14523699,14594443,	14345935,14350859,14377447,14408851,14412577,14439086,14491168,14523894,14594464,
[ENSDART00000122503 BX000690.1 chr1:14934071-14962132 (+), NM_001004212 Tusc3 chr1:14822877-14958311 (+)]	ENSDART00000122503	BX000690.1	chr1	+	14934071	14962129	14934071	14962021	3	14934071,14958222,14962005,	14934132,14958313,14962129,
[ENSDART00000013024 fgf20a chr1:15134971-15136368 (-)]	ENSDART00000013024	fgf20a	chr1	-	15134305	15136368	15135017	15136275	3	15134305,15135471,15135998,	15135263,15135575,15136368,
[NM_001191892 Efha2 chr1:15140689-15196803 (+), ENSDART00000113266 EFHA2 (1 of 2) chr1:15138922-15198657 (+)]	ENSDART00000113266	EFHA2 (1 of 2)	chr1	+	15138922	15198657	15138922	15197816	15	15138922,15140662,15147839,15148022,15162315,15164499,15164672,15169821,15173924,15182735,15185109,15194691,15195271,15196734,15197809,	15139228,15140810,15147871,15148101,15162363,15164582,15164744,15169863,15174020,15182830,15185281,15194800,15195429,15196799,15198657,
[ENSDART00000078675 vps37a chr1:15204973-15222101 (+)]	ENSDART00000078675	vps37a	chr1	+	15204973	15222106	15205308	15221510	12	15204973,15208740,15208911,15211978,15212165,15214910,15216331,15218370,15218636,15219488,15221429,15221623,	15205418,15208815,15209029,15212076,15212376,15214981,15216459,15218429,15218705,15219632,15221528,15222106,
[NM_001075641 MTMR7 chr1:15229566-15249458 (-), ENSDART00000127370 mtmr7b chr1:15226107-15249679 (-)]	ENSDART00000127370	mtmr7b	chr1	-	15224821	15249679	15226570	15249458	14	15224821,15229529,15230581,15234300,15236026,15237878,15240425,15240635,15242557,15242790,15245451,15246578,15248772,15249434,	15226635,15229684,15230716,15234501,15236076,15238007,15240535,15240768,15242692,15242919,15245609,15246741,15248892,15249679,
[ENSDART00000048855 MTUS1 (2 of 2) chr1:15282564-15359635 (+), NM_001112947 mtus1 chr1:15355750-15358854 (+)]	ENSDART00000048855	MTUS1 (2 of 2)	chr1	+	15282564	15359635	15282564	15358911	14	15282564,15290720,15301704,15306821,15310405,15332318,15345975,15351043,15354023,15354241,15354457,15355756,15356454,15358703,	15285018,15290859,15301896,15306962,15310519,15332548,15346042,15351258,15354129,15354315,15354553,15355873,15356552,15359635,
[ENSDART00000149026 pcm1 chr1:15363239-15396056 (+), ENSDART00000089654 pcm1 chr1:15367572-15395356 (+)]	ENSDART00000149026	pcm1	chr1	+	15363239	15396056	15367572	15395356	39	15363239,15367556,15368380,15368869,15371712,15375185,15375459,15375909,15376258,15376515,15376844,15377111,15377428,15377626,15377864,15379745,15379983,15380265,15380591,15381287,15381598,15381862,15383479,15383917,15384513,15385332,15385564,15385893,15388063,15388264,15388566,15388852,15389733,15391824,15392059,15392240,15392519,15392847,15395330,	15363356,15367674,15368626,15369169,15371883,15375363,15375569,15376156,15376409,15376710,15377008,15377347,15377547,15377756,15378029,15379909,15380178,15380515,15380737,15381463,15381725,15382215,15383641,15383974,15384686,15385464,15385697,15386040,15388167,15388399,15388764,15388912,15389854,15391976,15392129,15392431,15392612,15392971,15396056,
[ENSDART00000040434 asah1b chr1:15396152-15406860 (-)]	ENSDART00000040434	asah1b	chr1	-	15396152	15406860	15396590	15406843	14	15396152,15396774,15396920,15397816,15398651,15399473,15399699,15399939,15402074,15402234,15404063,15404347,15406445,15406765,	15396680,15396831,15397044,15397948,15398733,15399528,15399844,15399985,15402149,15402313,15404150,15404438,15406492,15406860,
[ENSDART00000079001 FRG1 chr1:15417525-15430769 (-)]	ENSDART00000079001	FRG1	chr1	-	15416950	15430769	15417525	15430769	12	15416950,15417150,15417225,15417382,15417803,15418004,15421562,15421793,15423392,15427683,15430480,15430710,	15417150,15417209,15417310,15417562,15417914,15418096,15421667,15421908,15423450,15427806,15430548,15430769,
[ENSDART00000145068 fat1 chr1:16118816-16266817 (+), ENSDART00000010526 fat1 chr1:16118816-16264608 (+), ENSDART00000103262 fat1 chr1:16118816-16264608 (+)]	ENSDART00000145068	fat1	chr1	+	16118816	16266822	16121186	16264403	27	16118816,16121161,16154544,16177265,16187741,16190968,16193805,16221639,16222185,16223086,16228287,16228918,16233357,16238110,16239195,16240011,16240239,16242017,16246898,16248173,16249415,16251493,16252685,16253742,16255060,16256964,16263732,	16118916,16124445,16154859,16177327,16188071,16191179,16193945,16221915,16222396,16227157,16228484,16229072,16233591,16238500,16239410,16240149,16240383,16242215,16247721,16248305,16249573,16251950,16252839,16253853,16255707,16257102,16266822,
[NM_001029887 HELT chr1:16336035-16336557 (+), ENSDART00000078889 helt chr1:16335286-16336940 (+)]	ENSDART00000078889	helt	chr1	+	16335286	16336939	16335332	16336848	4	16335286,16336032,16336219,16336411,	16335506,16336137,16336316,16336939,
[ENSDART00000030665 slc25a4 chr1:16418639-16420984 (+)]	ENSDART00000030665	slc25a4	chr1	+	16418639	16420983	16418713	16420521	4	16418639,16419576,16420143,16420363,	16418824,16420063,16420284,16420983,
[ENSDART00000146258 zgc:85910 chr1:16422938-16435168 (-), ENSDART00000078874 zgc:85910 chr1:16422939-16431753 (-)]	ENSDART00000078874	zgc:85910	chr1	-	16422933	16431753	16423378	16431727	4	16422933,16425077,16430536,16430898,	16423470,16425216,16430826,16431753,
[ENSDART00000103236 ankrd37 chr1:16437320-16440668 (+), NM_001017037 ankrd37 chr1:16437655-16437796 (+)]	ENSDART00000103236	ankrd37	chr1	+	16437320	16441596	16437454	16440230	4	16437320,16437643,16437969,16439995,	16437478,16437796,16438061,16441596,
[ENSDART00000122670 ufsp2 chr1:16441371-16453571 (-), ENSDART00000148322 ufsp2 chr1:16441365-16453531 (-), ENSDART00000078848 ufsp2 chr1:16441381-16453256 (-)]	ENSDART00000078848	ufsp2	chr1	-	16441386	16453256	16441690	16452904	11	16441386,16443111,16443771,16444326,16444541,16446010,16450457,16452447,16452686,16452833,16453167,	16441777,16443236,16443848,16444451,16444706,16446157,16450650,16452602,16452747,16452936,16453256,
[ENSDART00000018238 pdlim3a chr1:16463747-16477756 (-)]	ENSDART00000018238	pdlim3a	chr1	-	16464078	16477756	16464288	16477717	7	16464078,16466215,16466855,16467124,16467392,16470068,16477624,	16464457,16466327,16466989,16467312,16467468,16470220,16477756,
[ENSDART00000041215 sorbs2a chr1:16489843-16545516 (-), ENSDART00000138475 sorbs2a chr1:16489550-16545509 (-)]	ENSDART00000041215	sorbs2a	chr1	-	16483547	16545516	16489843	16545516	26	16483547,16491407,16491595,16493764,16494285,16496153,16499020,16499276,16499505,16501793,16502168,16502781,16503009,16505135,16517362,16522673,16525452,16525997,16526180,16527981,16528724,16531339,16534765,16541522,16541872,16545413,	16489905,16491514,16491612,16493781,16494301,16496177,16499191,16499405,16499620,16501840,16502239,16502817,16504677,16505321,16517391,16522678,16525467,16526112,16526385,16528032,16528791,16531515,16534892,16541647,16541899,16545516,
[ENSDART00000013021 tlr3 chr1:16634838-16640122 (+), ENSDART00000128529 tlr3 chr1:16635070-16639915 (+)]	ENSDART00000128529	tlr3	chr1	+	16635070	16640756	16635070	16639915	6	16635070,16635352,16636082,16636890,16637587,16639686,	16635106,16635377,16636459,16637085,16639434,16640756,
[NM_001092584 cyp4v2 chr1:16642918-16653300 (+), ENSDART00000089480 cyp4v2 chr1:16642200-16654540 (+)]	ENSDART00000089480	cyp4v2	chr1	+	16642200	16654391	16642251	16653647	11	16642200,16642871,16643626,16644699,16645560,16648238,16648447,16651110,16652475,16653118,16653474,	16642441,16642984,16643712,16644890,16645630,16648365,16648621,16651213,16652610,16653298,16654391,
[ENSDART00000054674 mtnr1aa chr1:16993229-17078773 (-)]	ENSDART00000054674	mtnr1aa	chr1	-	16989443	17078773	16993753	17078544	2	16989443,17078360,	16994622,17078773,
[ENSDART00000089442 klhl5 chr1:17105727-17188056 (-)]	ENSDART00000089442	klhl5	chr1	-	17099664	17188056	17105872	17188056	11	17099664,17110126,17115170,17117515,17119502,17126351,17141202,17145836,17147587,17163071,17187493,	17105929,17110298,17115383,17117678,17119727,17126538,17141415,17146033,17147724,17163254,17188056,
[ENSDART00000014916 klf3 chr1:17336040-17356958 (-)]	ENSDART00000014916	klf3	chr1	-	17336030	17356958	17338101	17348186	7	17336030,17340456,17343014,17343400,17345644,17348156,17356775,	17338283,17340596,17343153,17343554,17345986,17348205,17356958,
[ENSDART00000020970 pgm2 chr1:17521062-17545814 (-), NM_001106007 Pgm2 chr1:17526385-17541449 (-)]	ENSDART00000020970	pgm2	chr1	-	17521061	17545814	17522536	17545687	13	17521061,17526383,17526598,17526884,17529473,17530238,17530496,17531104,17533372,17533672,17539286,17541335,17545612,	17522639,17526517,17526788,17527014,17529567,17530422,17530594,17531294,17533566,17533756,17539478,17541503,17545814,
[ENSDART00000142026 si:dkey-167i21.2 chr1:17552785-17553412 (-)]	ENSDART00000142026	si:dkey-167i21.2	chr1	-	17552787	17553412	17552917	17553173	3	17552787,17553143,17553340,	17553064,17553261,17553412,
[ENSDART00000078610 zgc:73228 chr1:17553573-17558701 (+)]	ENSDART00000078610	zgc:73228	chr1	+	17553573	17563612	17557763	17558612	2	17553573,17557683,	17553910,17563612,
[ENSDART00000109294 zgc:195282 chr1:17583530-17590850 (-), ENSDART00000146410 zgc:195282 chr1:17583356-17590924 (-)]	ENSDART00000109294	zgc:195282	chr1	-	17579874	17590850	17584049	17590826	4	17579874,17585899,17586046,17590783,	17584096,17585954,17586141,17590850,
[ENSDART00000139241 RNF38 chr1:17604954-17675566 (+), ENSDART00000089233 RNF38 chr1:17609400-17678864 (+)]	ENSDART00000089233	RNF38	chr1	+	17609400	17678937	17609400	17674967	13	17609400,17636507,17662125,17663385,17665559,17666114,17667949,17668198,17670293,17670481,17671588,17674904,17678734,	17609932,17636569,17662319,17663641,17665739,17666273,17668111,17668302,17670381,17670603,17671688,17678673,17678937,
[ENSDART00000110517 si:ch211-157h5.5 chr1:17816348-17820526 (-), ENSDART00000141795 si:ch211-157h5.5 chr1:17816220-17821852 (-)]	ENSDART00000141795	si:ch211-157h5.5	chr1	-	17816218	17821852	17816348	17820526	3	17816218,17820352,17821590,	17816642,17820540,17821852,
[ENSDART00000114514 ptpn9b chr1:17836442-17854829 (+)]	ENSDART00000114514	ptpn9b	chr1	+	17836442	17856767	17836473	17854563	13	17836442,17840224,17840465,17843170,17843392,17846428,17846981,17849150,17850017,17850180,17850842,17852765,17854339,	17836503,17840368,17840555,17843295,17843498,17846539,17847811,17849247,17850087,17850259,17850993,17852973,17856767,
[ENSDART00000078594 tyrp1b chr1:18074731-18087943 (+), NM_000550 TYRP1 chr1:18076916-18083527 (+)]	ENSDART00000078594	tyrp1b	chr1	+	18074731	18087943	18076871	18087634	8	18074731,18076870,18078498,18080342,18082779,18083082,18083375,18087434,	18074809,18077226,18078821,18080547,18082947,18083262,18083525,18087943,
[ENSDART00000135552 RBM47 chr1:18094942-18144697 (-), ENSDART00000089070 RBM47 chr1:18094950-18111256 (-)]	ENSDART00000089070	RBM47	chr1	-	18094950	18111256	18099993	18111256	5	18094950,18103059,18105769,18107914,18110563,	18100239,18103250,18105976,18108383,18111256,
[ENSDART00000089025 lap3 chr1:18160274-18173405 (-)]	ENSDART00000089025	lap3	chr1	-	18160279	18173405	18160690	18173288	13	18160279,18164442,18164680,18164834,18166627,18166806,18167012,18168069,18168319,18170884,18172834,18172984,18173192,	18160877,18164555,18164760,18164937,18166716,18166931,18167171,18168234,18168479,18170990,18172889,18173100,18173405,
[NM_001163317 Clrn2 chr1:18257406-18257607 (+), ENSDART00000103091 CLRN2 chr1:18257122-18259686 (+)]	ENSDART00000103091	CLRN2	chr1	+	18257122	18260044	18257370	18259686	3	18257122,18259148,18259417,	18257623,18259328,18260044,
[ENSDART00000103089 si:dkey-245p14.4 chr1:18277038-18279254 (+)]	ENSDART00000103089	si:dkey-245p14.4	chr1	+	18277038	18280088	18277080	18278961	3	18277038,18277399,18278694,	18277201,18277563,18280088,
[ENSDART00000088949 si:dkey-245p14.6 chr1:18304646-18341137 (-), NM_172381 AI314180 chr1:18308304-18340331 (-)]	ENSDART00000088949	si:dkey-245p14.6	chr1	-	18304647	18341137	18305401	18341128	49	18304647,18308213,18308536,18311365,18311585,18311921,18312263,18312977,18314454,18314912,18315068,18316225,18316375,18316661,18317582,18318301,18318514,18318647,18319671,18319844,18320094,18320341,18320836,18321069,18321201,18322393,18322643,18322934,18325981,18326211,18326790,18328962,18329288,18330733,18330941,18331193,18331405,18331934,18332663,18332915,18333087,18333328,18333493,18334940,183…	18305541,18308366,18308625,18311471,18311730,18312114,18312307,18313189,18314646,18314979,18315160,18316292,18316465,18316754,18317733,18318420,18318562,18318753,18319751,18320012,18320212,18320410,18320951,18321124,18321347,18322517,18322745,18323107,18326123,18326346,18326882,18329182,18329369,18330857,18331045,18331316,18331472,18331984,18332739,18333001,18333207,18333407,18333633,18335112,183…
[ENSDART00000054574 polr1e chr1:18379206-18390122 (-)]	ENSDART00000054574	polr1e	chr1	-	18379209	18390122	18379328	18390087	12	18379209,18381675,18381891,18382136,18383576,18383758,18385635,18387495,18389348,18389513,18389703,18390029,	18379494,18381807,18381973,18382267,18383673,18383869,18385780,18387548,18389434,18389590,18389807,18390122,
[ENSDART00000054575 tmem192 chr1:18391439-18407669 (+)]	ENSDART00000054575	tmem192	chr1	+	18391439	18407443	18391511	18406922	6	18391439,18392110,18393965,18395691,18405803,18406798,	18391547,18392263,18394227,18395829,18405906,18407443,
[ENSDART00000054581 march1 chr1:18450402-18498132 (+), ENSDART00000131206 march1 chr1:18450402-18498254 (+)]	ENSDART00000131206	2012-03-01	chr1	+	18450402	18502464	18450402	18498132	6	18450402,18475933,18476061,18487112,18493664,18497815,	18450495,18475984,18476141,18487293,18493812,18502464,
[ENSDART00000005733 C1H4orf43 chr1:18501264-18505933 (-)]	ENSDART00000005733	C1H4orf43	chr1	-	18502474	18505933	18502676	18505829	7	18502474,18502924,18504572,18504795,18505486,18505634,18505826,	18502833,18502967,18504721,18504880,18505524,18505744,18505933,
[ENSDART00000112490 FNIP2 chr1:18520571-18544497 (+), ENSDART00000138276 FNIP2 chr1:18506889-18544497 (+)]	ENSDART00000112490	FNIP2	chr1	+	18520571	18547303	18520571	18544497	30	18520571,18521014,18521226,18521988,18523593,18523804,18523989,18524171,18525913,18526095,18527041,18529767,18529982,18531760,18534185,18534599,18537759,18538475,18538665,18539406,18539656,18539722,18539993,18540129,18540242,18540342,18540639,18541599,18543018,18544418,	18520587,18521152,18521247,18522017,18523686,18523905,18524067,18524233,18525936,18526180,18527113,18529903,18530184,18531849,18534332,18534769,18538450,18538646,18538698,18539487,18539678,18539747,18540085,18540174,18540270,18540354,18540833,18541800,18543134,18547303,
[ENSDART00000111454 UBA6 chr1:18591062-18628284 (+)]	ENSDART00000111454	UBA6	chr1	+	18591062	18630015	18597384	18628027	33	18591062,18597339,18597542,18598885,18599897,18603813,18605660,18605817,18607982,18608183,18608371,18608539,18609946,18610089,18610636,18611591,18611818,18612001,18613887,18614163,18615142,18616374,18616542,18621758,18621898,18622091,18623216,18624413,18624633,18624914,18625136,18627657,18627876,	18591103,18597422,18597637,18598914,18599992,18603925,18605741,18605940,18608106,18608287,18608434,18608616,18610013,18610233,18610704,18611670,18611899,18612079,18614069,18614269,18615232,18616455,18616671,18621810,18621962,18622161,18623288,18624537,18624827,18625042,18625224,18627752,18630015,
[ENSDART00000102993 mettl14 chr1:18807187-18811849 (-)]	ENSDART00000102993	mettl14	chr1	-	18807190	18811849	18807423	18811739	11	18807190,18808450,18808793,18809099,18809699,18810130,18810299,18810970,18811153,18811443,18811673,	18807728,18808661,18808910,18809192,18809841,18810221,18810387,18811048,18811241,18811532,18811849,
[ENSDART00000088653 prss12 chr1:18813342-18876795 (+), ENSDART00000140263 prss12 chr1:18822536-18879992 (+)]	ENSDART00000140263	prss12	chr1	+	18822536	18880462	18822536	18876795	11	18822536,18822801,18830706,18832359,18833232,18844614,18850568,18855474,18855704,18867535,18876487,	18822716,18822952,18830885,18832501,18833429,18844756,18850771,18855553,18855827,18867834,18880462,
[ENSDART00000061232 ndst3 chr1:18885603-19051984 (-), ENSDART00000146084 ndst3 chr1:18885369-19054531 (-), ENSDART00000136145 ndst3 chr1:18885369-19051984 (-)]	ENSDART00000061232	ndst3	chr1	-	18884743	19051984	18885603	19051984	14	18884743,18889086,18893392,18898746,18898983,18904612,18908403,18909126,18912074,18932197,18950338,18959588,18962455,19051000,	18885723,18889189,18893411,18898837,18899154,18904787,18908527,18909223,18912257,18932326,18950524,18959743,18962543,19051984,
[ENSDART00000054472 tll1 chr1:19514405-19607327 (-)]	ENSDART00000054472	tll1	chr1	-	19509639	19607327	19515500	19605662	22	19509639,19517334,19520209,19523169,19533807,19540602,19540921,19544866,19545083,19545817,19548159,19548394,19548673,19551986,19552206,19554775,19569800,19569998,19574087,19581278,19605484,19607115,	19515635,19517585,19520423,19523297,19533933,19540783,19541082,19544992,19545279,19545963,19548276,19548497,19548789,19552111,19552312,19554954,19569918,19570169,19574168,19581389,19605919,19607327,
[ENSDART00000078271 cpe chr1:19648161-19692601 (-)]	ENSDART00000078271	cpe	chr1	-	19648162	19692601	19652230	19692438	9	19648162,19652408,19655272,19655514,19659355,19659933,19660183,19668203,19692197,	19652329,19652527,19655372,19655654,19659538,19660051,19660351,19668400,19692601,
[ENSDART00000078277 sc4mol chr1:19697854-19710076 (-), ENSDART00000100817 sc4mol chr1:19695810-19707346 (-)]	ENSDART00000078277	sc4mol	chr1	-	19697849	19710076	19698467	19707346	6	19697849,19703827,19704802,19706833,19707091,19710001,	19698657,19703982,19704929,19706982,19707380,19710076,
[ENSDART00000088545 KLHL2 chr1:19713355-19751570 (-)]	ENSDART00000088545	KLHL2	chr1	-	19712525	19751570	19713877	19751253	15	19712525,19715542,19722782,19722994,19724849,19725559,19728097,19732192,19732454,19737278,19737520,19740313,19743416,19747287,19751236,	19713906,19715686,19722923,19723123,19724951,19725757,19728215,19732342,19732571,19737388,19737683,19740435,19743523,19747413,19751570,
[ENSDART00000054440 tmem144a chr1:20095810-20104128 (-)]	ENSDART00000054440	tmem144a	chr1	-	20095861	20104128	20096659	20103996	12	20095861,20098289,20098873,20099066,20099271,20100331,20100770,20101394,20101930,20102157,20103679,20103917,	20096743,20098343,20098971,20099186,20099390,20100408,20100849,20101475,20102030,20102280,20103823,20104128,
[ENSDART00000102790 glrba chr1:20205661-20266484 (-), ENSDART00000148863 glrba chr1:20206146-20261203 (-)]	ENSDART00000102790	glrba	chr1	-	20205657	20266484	20206146	20266045	11	20205657,20221978,20230422,20232373,20246646,20252811,20255747,20256257,20260481,20261084,20266040,	20206443,20222128,20230571,20232526,20246787,20252894,20255974,20256325,20260588,20261201,20266484,
[ENSDART00000049572 ncapd3 chr1:20323104-20345692 (-), NM_001089625 ncapd3 chr1:20328082-20340659 (-)]	ENSDART00000049572	ncapd3	chr1	-	20323105	20345692	20323265	20345651	35	20323105,20323470,20323830,20324713,20327594,20327786,20328013,20328967,20329163,20330550,20330764,20331001,20332236,20332579,20332792,20334160,20335084,20335786,20336429,20336707,20339293,20339542,20339699,20339906,20340562,20340939,20341568,20341763,20341983,20342331,20342781,20343065,20344636,20344882,20345599,	20323338,20323525,20323893,20324755,20327662,20327920,20328184,20329078,20329360,20330684,20330902,20331081,20332475,20332681,20332901,20334268,20335194,20335884,20336621,20336928,20339428,20339616,20339819,20339942,20340815,20341065,20341641,20341897,20342071,20342393,20342949,20343241,20344799,20345037,20345692,
[ENSDART00000077833 adamtsl7 chr1:20359324-20375363 (-), ENSDART00000148327 adamtsl7 chr1:20359325-20381871 (-)]	ENSDART00000148327	adamtsl7	chr1	-	20359324	20381871	20359528	20381871	12	20359324,20361817,20362125,20364316,20364572,20368056,20370197,20372897,20374353,20375195,20376319,20381642,	20359668,20361962,20362305,20364493,20364746,20368270,20370327,20373065,20374459,20375371,20376503,20381871,
[ENSDART00000054395 pax5 chr1:20566348-20650521 (+), ENSDART00000076986 pax5 chr1:20561271-20650521 (+), ENSDART00000132602 pax5 chr1:20560787-20650521 (+)]	ENSDART00000054395	pax5	chr1	+	20566348	20650837	20566348	20650521	11	20566348,20572284,20579944,20583745,20588200,20604354,20625311,20633639,20642110,20645810,20650438,	20566391,20572450,20580142,20583810,20588326,20604455,20625441,20633741,20642197,20645897,20650837,
[ENSDART00000047728 melk chr1:20696353-20716785 (-), ENSDART00000125259 melk chr1:20696017-20715668 (-)]	ENSDART00000047728	melk	chr1	-	20696353	20716785	20696671	20715668	18	20696353,20698582,20700203,20702419,20704399,20707035,20708388,20709535,20710511,20710693,20710923,20713153,20713447,20714911,20715143,20715419,20715604,20716580,	20696858,20698686,20700363,20702525,20704664,20707188,20708517,20709622,20710610,20710762,20711022,20713246,20713516,20715055,20715260,20715505,20715685,20716785,
[NM_001146695 KDM4C chr1:20772974-20794469 (+), ENSDART00000087729 KDM4C chr1:20772167-20806880 (+)]	ENSDART00000087729	KDM4C	chr1	+	20772167	20806879	20772950	20806402	22	20772167,20772915,20775842,20776249,20779542,20779860,20780026,20780245,20782124,20783162,20784812,20788196,20789804,20790072,20792074,20793940,20794360,20796271,20799449,20803693,20803908,20806240,	20772249,20773094,20776018,20776364,20779736,20779910,20780130,20780383,20782315,20783335,20786506,20788308,20789986,20790271,20792151,20793996,20794469,20796460,20799620,20803813,20804001,20806879,
[ENSDART00000074678 chrnb3a chr1:21162892-21186136 (-)]	ENSDART00000074678	chrnb3a	chr1	-	21162895	21186136	21163374	21185894	6	21162895,21165212,21167488,21167689,21175797,21185833,	21163506,21166116,21167598,21167734,21175949,21186136,
[ENSDART00000147193 si:dkey-234d14.2 chr1:21201228-21202947 (+)]	ENSDART00000147193	si:dkey-234d14.2	chr1	+	21201228	21202962	21201294	21202926	3	21201228,21202023,21202300,	21201586,21202191,21202962,
[ENSDART00000031546 chrna6 chr1:21258658-21286157 (-)]	ENSDART00000031546	chrna6	chr1	-	21256380	21286157	21258898	21285999	6	21256380,21264249,21265484,21269244,21273041,21285941,	21259024,21265309,21265594,21269289,21273181,21286157,
[ENSDART00000036797 uchl1 chr1:21421850-21426118 (-), ENSDART00000122309 uchl1 chr1:21421849-21422305 (-)]	ENSDART00000036797	uchl1	chr1	-	21421850	21426118	21422221	21426057	9	21421850,21422485,21422650,21422813,21423117,21424266,21425435,21425902,21426024,	21422305,21422544,21422720,21422861,21423203,21424402,21425564,21425914,21426118,
[ENSDART00000019698 anxa5b chr1:21428977-21439189 (+)]	ENSDART00000019698	anxa5b	chr1	+	21428977	21439189	21429331	21438384	13	21428977,21429288,21432099,21434147,21434338,21434568,21434800,21435035,21435692,21435880,21436122,21438111,21438321,	21429044,21429334,21432184,21434242,21434452,21434659,21434880,21435086,21435786,21435976,21436181,21438234,21439189,
[ENSDART00000128918 FGFBP1 (2 of 2) chr1:21451705-21452326 (-), NM_001141875 fgfp1 chr1:21451897-21452071 (-)]	ENSDART00000128918	FGFBP1 (2 of 2)	chr1	-	21450791	21452326	21451705	21452326	1	21450791,	21452326,
[ENSDART00000076766 FGFBP2 (1 of 2) chr1:21460056-21465276 (-)]	ENSDART00000076766	FGFBP2 (1 of 2)	chr1	-	21460056	21465276	21461072	21461912	4	21460056,21460306,21461056,21465233,	21460218,21460437,21462007,21465276,
[ENSDART00000017413 ZMYND10 chr1:21465389-21477477 (+), NM_001096803 zmynd10 chr1:21465672-21477312 (+)]	ENSDART00000017413	ZMYND10	chr1	+	21465389	21477599	21465437	21477378	12	21465389,21465671,21467437,21467659,21467794,21468817,21469020,21470608,21471019,21474469,21474690,21477278,	21465523,21465780,21467554,21467713,21467947,21468906,21469112,21470781,21471145,21474591,21474816,21477599,
[ENSDART00000086867 tapt1b chr1:21544348-21577241 (-)]	ENSDART00000086867	tapt1b	chr1	-	21544349	21577241	21546641	21577211	14	21544349,21549614,21551223,21551403,21551922,21558165,21558376,21558546,21558989,21560434,21560675,21565638,21569318,21577021,	21546874,21549781,21551300,21551472,21551982,21558275,21558457,21558616,21559087,21560570,21560838,21565757,21569449,21577241,
[ENSDART00000043556 ldb2b chr1:21579491-21608918 (-), NM_057734 Chi chr1:21582919-21604921 (-)]	ENSDART00000043556	ldb2b	chr1	-	21579167	21608918	21582778	21608779	9	21579167,21588934,21591838,21594335,21594562,21597313,21603364,21604833,21608647,	21583015,21589059,21591892,21594459,21594646,21597436,21603537,21604936,21608918,
[ENSDART00000054386 qdprb1 chr1:21619318-21625575 (-)]	ENSDART00000054386	qdprb1	chr1	-	21619408	21625575	21619563	21625515	7	21619408,21619752,21619917,21623487,21623829,21625110,21625422,	21619666,21619836,21620026,21623628,21623926,21625203,21625575,
[ENSDART00000016488 gtf2e2 chr1:21625839-21646368 (+)]	ENSDART00000016488	gtf2e2	chr1	+	21625839	21646365	21630097	21646099	8	21625839,21630096,21638079,21638851,21643600,21645530,21645737,21645979,	21625980,21630260,21638171,21638959,21643783,21645624,21645853,21646365,
[ENSDART00000147857 si:dkey-92j12.5 chr1:22004552-22014140 (+), NM_057994 Patj chr1:21946365-21963128 (+)]	ENSDART00000147857	si:dkey-92j12.5	chr1	+	22004552	22016894	22004585	22013943	7	22004552,22004827,22004965,22006912,22007104,22013459,22013778,	22004739,22004871,22005076,22007017,22007214,22013583,22016894,
[NM_001011234 lias chr1:22050896-22054723 (+), ENSDART00000036448 lias chr1:22048803-22057562 (+)]	ENSDART00000036448	lias	chr1	+	22048803	22057556	22048864	22057225	11	22048803,22049253,22050898,22051644,22051864,22053738,22053875,22054400,22054649,22055070,22057157,	22048954,22049441,22050992,22051725,22052021,22053796,22054004,22054546,22054720,22055182,22057556,
[ENSDART00000122648 ugdh chr1:22058231-22067355 (-), ENSDART00000013263 ugdh chr1:22057625-22068847 (-)]	ENSDART00000013263	ugdh	chr1	-	22057623	22068847	22058257	22068372	12	22057623,22058468,22060958,22061198,22063050,22064192,22064445,22065048,22066455,22066735,22067105,22068372,	22058359,22058579,22061050,22061338,22063181,22064287,22064593,22065246,22066656,22066837,22067267,22068847,
[ENSDART00000137567 C1H4orf34 chr1:22073029-22082319 (-), ENSDART00000008201 C1H4orf34 chr1:22071716-22082402 (-)]	ENSDART00000137567	C1H4orf34	chr1	-	22072938	22082319	22073141	22082319	5	22072938,22075705,22075950,22078955,22082217,	22073180,22075854,22075999,22079043,22082319,
[ENSDART00000025770 ube2k chr1:22085996-22096682 (+), ENSDART00000139003 ube2k chr1:22085710-22097063 (+)]	ENSDART00000025770	ube2k	chr1	+	22085996	22095893	22086165	22095448	7	22085996,22086890,22087079,22089692,22090190,22091986,22095373,	22086228,22086984,22087138,22089775,22090290,22092115,22095893,
[ENSDART00000087658 n4bp2 chr1:22146587-22167909 (+)]	ENSDART00000087658	n4bp2	chr1	+	22146587	22167307	22146715	22167185	16	22146587,22147406,22148973,22149934,22150490,22150784,22151142,22153973,22154193,22160285,22160527,22162198,22162409,22164393,22164688,22167139,	22146986,22148322,22149098,22150023,22150567,22150937,22153526,22154059,22154239,22160440,22160652,22162325,22162592,22164562,22164812,22167307,
[ENSDART00000102646 rhoh chr1:22172498-22173086 (+), NM_001126963 rhoh chr1:22172519-22173032 (+)]	ENSDART00000102646	rhoh	chr1	+	22172498	22173324	22172498	22173086	1	22172498,	22173324,
[ENSDART00000077335 chrna9 chr1:22182711-22191655 (+), ENSDART00000140706 chrna9 chr1:22182715-22192005 (+)]	ENSDART00000140706	chrna9	chr1	+	22182715	22191790	22182756	22191655	5	22182715,22186344,22186625,22187442,22190795,	22182852,22186499,22186809,22187794,22191790,
[ENSDART00000134576 GSG2 chr1:22263362-22280628 (+)]	ENSDART00000134576	GSG2	chr1	+	22263362	22281540	22264242	22280486	18	22263362,22264230,22264579,22265035,22265291,22265655,22267800,22269158,22271426,22271685,22272046,22272217,22272446,22272611,22278156,22278347,22280088,22280281,	22263454,22264409,22264684,22265206,22265382,22266248,22268572,22269333,22271584,22271871,22272132,22272280,22272538,22272691,22278245,22278490,22280191,22281540,
[ENSDART00000145942 fam184b chr1:22280618-22331971 (-), ENSDART00000077394 fam184b chr1:22281184-22331792 (-)]	ENSDART00000145942	fam184b	chr1	-	22280614	22331971	22281184	22331792	18	22280614,22281971,22284009,22284190,22285865,22289516,22289766,22295720,22296513,22296777,22298502,22298911,22300712,22302111,22304408,22306797,22309655,22331633,	22281275,22282228,22284114,22284299,22286030,22289680,22289897,22295937,22296696,22296895,22298609,22299091,22300808,22302384,22304560,22306933,22310330,22331971,
[ENSDART00000007531 slit2 chr1:22557442-22684130 (+), NM_003061 SLIT1 chr1:22559046-22677130 (+)]	ENSDART00000007531	slit2	chr1	+	22557442	22684133	22558998	22682799	36	22557442,22560107,22562522,22569050,22622947,22623475,22625089,22627259,22627790,22632180,22632343,22635394,22636936,22638940,22641625,22644097,22644265,22644665,22647602,22648039,22648407,22649414,22650904,22651149,22653208,22653767,22657452,22662905,22663656,22671465,22671702,22672024,22676634,22676939,22677407,22682554,	22559156,22560179,22562594,22569122,22623019,22623547,22625161,22627423,22627923,22632252,22632415,22635466,22637080,22639104,22641776,22644172,22644409,22644809,22647769,22648172,22648476,22649486,22650976,22651221,22653372,22653892,22657550,22663045,22663750,22671603,22671943,22672155,22676789,22677228,22677616,22684133,
[ENSDART00000014608 mab21l2 chr1:22850480-22852291 (+)]	ENSDART00000014608	mab21l2	chr1	+	22850480	22852291	22850818	22851898	1	22850480,	22852291,
[ENSDART00000051763 rps3a chr1:23130371-23134510 (+)]	ENSDART00000051763	rps3a	chr1	+	23130371	23134509	23130402	23134465	6	23130371,23130966,23131562,23132770,23133319,23134334,	23130464,23131070,23131750,23132979,23133429,23134509,
[ENSDART00000102542 zgc:171517 chr1:23151250-23155390 (+)]	ENSDART00000102542	zgc:171517	chr1	+	23151250	23155388	23151278	23155343	8	23151250,23151643,23151958,23153273,23153571,23154890,23155073,23155234,	23151306,23151756,23152051,23153370,23153712,23154999,23155157,23155388,
[ENSDART00000123789 qdprb2 chr1:23157507-23160836 (+)]	ENSDART00000123789	qdprb2	chr1	+	23157507	23160835	23157826	23160792	8	23157507,23158188,23158495,23159325,23159518,23160341,23160530,23160683,	23157854,23158301,23158588,23159422,23159659,23160450,23160614,23160835,
[ENSDART00000130356 si:dkey-40h17.4 chr1:23162515-23166530 (+)]	ENSDART00000130356	si:dkey-40h17.4	chr1	+	23162515	23166507	23162821	23166484	8	23162515,23163165,23163466,23164311,23164503,23166032,23166216,23166375,	23162849,23163278,23163559,23164408,23164644,23166141,23166300,23166507,
[ENSDART00000129804 CT573492.3 chr1:23255866-23258852 (+)]	ENSDART00000129804	CT573492.3	chr1	+	23255866	23258895	23255866	23258852	8	23255866,23256255,23256563,23257393,23257587,23258401,23258590,23258743,	23255921,23256368,23256656,23257490,23257728,23258510,23258674,23258895,
[ENSDART00000109349 CT573492.1 chr1:23260924-23264642 (+)]	ENSDART00000109349	CT573492.1	chr1	+	23260924	23264665	23260924	23264642	8	23260924,23261295,23261596,23262458,23262650,23264190,23264374,23264533,	23260979,23261408,23261689,23262555,23262791,23264299,23264458,23264665,
[ENSDART00000122220 SH3D19 (1 of 2) chr1:23267188-23320192 (-)]	ENSDART00000122220	SH3D19 (1 of 2)	chr1	-	23267186	23320192	23267337	23320067	20	23267186,23267429,23269010,23271242,23271623,23274118,23274920,23275903,23276182,23278228,23278667,23279507,23284055,23284267,23287876,23308350,23308884,23309024,23313689,23319991,	23267354,23267616,23269054,23271469,23271694,23274249,23274996,23276047,23276251,23278469,23278708,23279596,23284169,23285179,23288054,23308483,23308930,23309065,23313729,23320192,
[ENSDART00000086556 fam160a1 chr1:23343889-23368434 (+)]	ENSDART00000086556	fam160a1	chr1	+	23343889	23375377	23343889	23368434	11	23343889,23345682,23348196,23350489,23350660,23352803,23353102,23357565,23360424,23364795,23368237,	23343994,23346375,23348355,23350576,23350828,23352883,23353302,23358507,23360603,23364910,23375377,
[ENSDART00000076519 DCTPP1 chr1:23414319-23415167 (+)]	ENSDART00000076519	DCTPP1	chr1	+	23414319	23415167	23414338	23414830	1	23414319,	23415167,
[ENSDART00000112120 tmem154 chr1:24022659-24034451 (-), ENSDART00000144711 tmem154 chr1:24011475-24034486 (-)]	ENSDART00000144711	tmem154	chr1	-	24009641	24034486	24022676	24034350	9	24009641,24022662,24025095,24027372,24031219,24031529,24032319,24032538,24034295,	24012060,24022711,24025169,24027424,24031429,24031574,24032358,24032577,24034486,
[ENSDART00000111426 si:ch211-208h7.4 chr1:24075571-24173548 (+), ENSDART00000133208 si:ch211-208h7.4 chr1:24075576-24173549 (+)]	ENSDART00000133208	si:ch211-208h7.4	chr1	+	24075576	24173553	24075576	24173350	34	24075576,24076513,24088659,24112846,24123318,24124900,24126239,24130031,24131909,24138577,24138748,24138945,24140558,24141252,24142348,24143868,24144094,24147311,24147926,24148121,24151250,24151596,24154128,24154405,24162614,24163801,24164386,24166016,24166390,24168233,24170409,24170643,24170805,24173035,	24075815,24076584,24088697,24112918,24123442,24125017,24126344,24130109,24132063,24138636,24138854,24139048,24140703,24141423,24142418,24143989,24144164,24147421,24147996,24148237,24151393,24151783,24154314,24154552,24163158,24163932,24164520,24166193,24166469,24168343,24170539,24170720,24170942,24173553,
[ENSDART00000050445 trim2a chr1:24179844-24227681 (-)]	ENSDART00000050445	trim2a	chr1	-	24174789	24227681	24180487	24202385	12	24174789,24181813,24183764,24184542,24185221,24185529,24188853,24193754,24194731,24197593,24202251,24227515,	24180640,24181954,24183835,24184711,24185389,24185633,24189580,24193935,24194883,24197828,24202430,24227681,
[ENSDART00000111686 fhdc1 chr1:24256265-24277420 (-), ENSDART00000134470 fhdc1 chr1:24256913-24296137 (-)]	ENSDART00000111686	fhdc1	chr1	-	24256229	24277420	24258741	24277420	11	24256229,24261024,24261345,24261667,24261896,24262864,24263449,24263845,24266369,24269614,24276973,	24260907,24261189,24261463,24261738,24262004,24262935,24263550,24263931,24266472,24269676,24277420,
[ENSDART00000102498 sfrp2 chr1:24348723-24353533 (-)]	ENSDART00000102498	sfrp2	chr1	-	24347122	24353533	24349020	24353502	3	24347122,24352814,24353006,	24349328,24352895,24353533,
[ENSDART00000054228 lrata chr1:24554197-24555439 (+)]	ENSDART00000054228	lrata	chr1	+	24554197	24555437	24554225	24554985	2	24554197,24554832,	24554750,24555437,
[ENSDART00000121673 AL935184.1 chr1:24565017-24566450 (+)]	ENSDART00000121673	AL935184.1	chr1	+	24565017	24566480	24565017	24566317	3	24565017,24565793,24566109,	24565511,24566012,24566480,
[ENSDART00000054225 map9 chr1:24595167-24607057 (-), ENSDART00000133937 map9 chr1:24595166-24607288 (-)]	ENSDART00000054225	map9	chr1	-	24595167	24607057	24595583	24607057	13	24595167,24598847,24599187,24599450,24600097,24600300,24601210,24603372,24603590,24603851,24605406,24606777,24606982,	24595703,24598983,24599333,24599612,24600187,24600457,24601281,24603428,24603675,24604057,24606027,24606889,24607057,
[NM_079864 Gycbeta100B chr1:24659640-24696683 (+), ENSDART00000129471 gucy1b3 chr1:24659047-24699059 (+)]	ENSDART00000129471	gucy1b3	chr1	+	24659047	24700208	24659222	24698939	13	24659047,24659640,24660699,24660946,24661956,24668655,24670004,24670747,24671906,24684770,24689651,24696527,24698821,	24659225,24659714,24660800,24661065,24662154,24668886,24670121,24670881,24672104,24685008,24689792,24696682,24700208,
[ENSDART00000027973 fabp2 chr1:24705630-24708975 (+), NM_001085877 fabp2-a chr1:24706041-24708591 (+)]	ENSDART00000027973	fabp2	chr1	+	24705630	24708929	24706047	24708725	4	24705630,24706191,24708483,24708674,	24706114,24706364,24708591,24708929,
[ENSDART00000128472 myoz2b chr1:24775678-24791691 (-), ENSDART00000136321 myoz2b chr1:24774990-24794079 (-), ENSDART00000054213 myoz2b chr1:24774991-24794052 (-), ENSDART00000146488 myoz2b chr1:24775618-24794077 (-)]	ENSDART00000054213	myoz2b	chr1	-	24774991	24794052	24775678	24789510	5	24774991,24777832,24786587,24789390,24793963,	24775904,24778016,24786699,24789557,24794052,
[ENSDART00000054202 si:ch211-145b13.5 chr1:24894066-24906266 (-)]	ENSDART00000054202	si:ch211-145b13.5	chr1	-	24894050	24906266	24895810	24905974	8	24894050,24895954,24897486,24897728,24899216,24900305,24900499,24905886,	24895858,24896017,24897591,24897836,24899287,24900375,24900624,24906266,
[ENSDART00000147595 pdcd4a chr1:24928735-24945776 (-), ENSDART00000030141 pdcd4a chr1:24928735-24945386 (-)]	ENSDART00000147595	pdcd4a	chr1	-	24928734	24945776	24929942	24945377	12	24928734,24932933,24933718,24934064,24935170,24935858,24937318,24939125,24939975,24940989,24945331,24945562,	24929994,24933073,24933829,24934172,24935285,24935956,24937540,24939239,24940073,24941289,24945405,24945776,
[ENSDART00000141043 mxd4 chr1:24954456-24979160 (+), ENSDART00000059264 mxd4 chr1:24954624-24976033 (+)]	ENSDART00000059264	mxd4	chr1	+	24954624	24979949	24954624	24976033	8	24954624,24955109,24955876,24956970,24968304,24971480,24975875,24976816,	24954688,24955206,24955945,24957039,24968419,24971640,24976738,24979949,
[ENSDART00000054205 ndufb6 chr1:24981837-24985820 (+), NM_001016490 ndufb6 chr1:24981919-24982021 (+)]	ENSDART00000054205	ndufb6	chr1	+	24981837	24985819	24981919	24985738	4	24981837,24982230,24983411,24985669,	24982099,24982323,24983456,24985819,
[NM_063228 B0228.7 chr1:25006349-25006520 (+), NM_001160570 mtap chr1:25001891-25002535 (+), ENSDART00000054208 mtap chr1:24993572-25010532 (+)]	ENSDART00000054208	mtap	chr1	+	24993572	25010549	24993656	25010176	8	24993572,25001891,25002190,25002369,25006100,25006292,25009894,25010137,	24993680,25001978,25002249,25002537,25006203,25006532,25010017,25010549,
[ENSDART00000054209 cdkn2b chr1:25011640-25013676 (-)]	ENSDART00000054209	cdkn2b	chr1	-	25010017	25013676	25011640	25013676	2	25010017,25013550,	25011892,25013676,
[ENSDART00000112899 cxxc4 chr1:25135779-25175791 (-), ENSDART00000142073 cxxc4 chr1:25135779-25175485 (-)]	ENSDART00000112899	cxxc4	chr1	-	25134239	25175791	25135779	25175791	2	25134239,25174966,	25135824,25175791,
[ENSDART00000149120 si:ch211-216c6.1 chr1:25238947-25269896 (+), ENSDART00000113020 si:ch211-216c6.1 chr1:25256873-25269817 (+)]	ENSDART00000113020	si:ch211-216c6.1	chr1	+	25256873	25269546	25256873	25266661	9	25256873,25259666,25259836,25260093,25260431,25260659,25260942,25261247,25265324,	25259577,25259757,25259930,25260302,25260582,25260749,25261080,25261581,25269546,
[ENSDART00000123826 ppa2 chr1:25272911-25280949 (-), NM_176867 PPA2 chr1:25276778-25277050 (-), NM_001027902 pyp-1 chr1:25277157-25277811 (-)]	ENSDART00000123826	ppa2	chr1	-	25274189	25280949	25274731	25280836	12	25274189,25274826,25274952,25276752,25276924,25277135,25277517,25277694,25279972,25280104,25280290,25280658,	25274754,25274866,25275022,25276841,25277052,25277262,25277604,25277814,25280026,25280143,25280355,25280949,
[ENSDART00000125690 ints12 chr1:25321185-25326663 (-)]	ENSDART00000125690	ints12	chr1	-	25321185	25326663	25321379	25326304	6	25321185,25324833,25325070,25325623,25325902,25326148,	25322003,25324986,25325230,25325808,25326064,25326663,
[NM_001006150 G3BP1 chr1:25328222-25345739 (+), ENSDART00000046376 g3bp2 chr1:25327573-25348017 (+)]	ENSDART00000046376	g3bp2	chr1	+	25327573	25348016	25328228	25345955	13	25327573,25328202,25328415,25328571,25330706,25332054,25336236,25336575,25337152,25338827,25338987,25339249,25345673,	25327777,25328323,25328497,25328745,25330797,25332157,25336423,25336677,25337255,25338887,25339113,25339368,25348016,
[ENSDART00000003618 INTS12 (1 of 2) chr1:25414013-25419172 (-)]	ENSDART00000003618	INTS12 (1 of 2)	chr1	-	25414006	25419172	25414207	25419133	6	25414006,25417661,25417898,25418452,25418731,25418977,	25414831,25417814,25418058,25418637,25418893,25419172,
[ENSDART00000132535 G3BP2 (1 of 3) chr1:25421061-25438574 (+), NM_001093037 g3bp2 chr1:25421055-25423628 (+)]	ENSDART00000132535	G3BP2 (1 of 3)	chr1	+	25421061	25440658	25421061	25438574	12	25421061,25421248,25421404,25423538,25424886,25429059,25429398,25429980,25431661,25431827,25432223,25438292,	25421156,25421330,25421578,25423629,25424989,25429246,25429500,25430083,25431727,25431953,25432342,25440658,
[ENSDART00000130805 USO1 (1 of 2) chr1:25455781-25483997 (+), NM_001093001 LOC446301 chr1:25442422-25466771 (+)]	ENSDART00000130805	USO1 (1 of 2)	chr1	+	25455781	25484869	25455781	25483997	19	25455781,25455930,25456154,25459892,25464003,25464239,25466562,25467909,25472302,25473361,25474154,25474558,25475037,25475308,25477802,25477968,25481706,25481895,25483913,	25455838,25456051,25456333,25460033,25464092,25464397,25466768,25467930,25472413,25473480,25474336,25474680,25475176,25475472,25477862,25478067,25481802,25482111,25484869,
[ENSDART00000109627 AL954695.2 chr1:25517742-25519707 (+)]	ENSDART00000109627	AL954695.2	chr1	+	25517742	25519767	25517742	25519752	6	25517742,25518060,25518277,25518819,25519284,25519618,	25517804,25518158,25518333,25519201,25519461,25519767,
[ENSDART00000145374 AL954695.6 chr1:25546252-25549136 (+)]	ENSDART00000145374	AL954695.6	chr1	+	25546252	25549428	25546252	25549184	5	25546252,25546439,25548206,25548670,25549050,	25546339,25546494,25548587,25548847,25549428,
[ENSDART00000011645 coro2a chr1:25571326-25620378 (+)]	ENSDART00000011645	coro2a	chr1	+	25571326	25620378	25571326	25619321	12	25571326,25592901,25601901,25604051,25606945,25610028,25611625,25611837,25615144,25615375,25617041,25619189,	25571341,25593102,25602018,25604201,25607125,25610145,25611730,25611934,25615257,25615466,25617325,25620378,
[NM_001139759 LOC100194711 chr1:25626462-25628906 (-), ENSDART00000102500 anp32b chr1:25626436-25630757 (-)]	ENSDART00000102500	anp32b	chr1	-	25626437	25630757	25626976	25630757	7	25626437,25627136,25627282,25627472,25628545,25628755,25630703,	25627059,25627206,25627395,25627659,25628668,25628905,25630757,
[ENSDART00000054184 C1H9orf156 chr1:25636948-25642038 (-)]	ENSDART00000054184	C1H9orf156	chr1	-	25637005	25642038	25637042	25639525	5	25637005,25637928,25639398,25640797,25641917,	25637275,25638477,25639556,25640972,25642038,
[NM_001160456 LOC100301610 chr1:25668423-25668918 (-), ENSDART00000109297 foxe1 chr1:25667934-25668999 (-)]	ENSDART00000109297	foxe1	chr1	-	25667372	25668999	25667934	25668999	1	25667372,	25668999,
[ENSDART00000090611 sh3gl2 chr1:25706787-25748582 (-)]	ENSDART00000090611	sh3gl2	chr1	-	25705773	25748582	25707415	25748480	10	25705773,25706187,25707739,25714094,25715046,25717080,25718315,25718555,25727960,25748435,	25706135,25707612,25707858,25714198,25715205,25717214,25718459,25718628,25728029,25748582,
[ENSDART00000135759 si:ch211-127n13.2 chr1:26496893-26508188 (-)]	ENSDART00000135759	si:ch211-127n13.2	chr1	-	26496860	26508188	26497487	26508187	6	26496860,26497484,26501723,26501950,26507688,26508132,	26497374,26497672,26501831,26501998,26507766,26508188,
[ENSDART00000133553 si:dkey-29d5.2 chr1:26704715-26708219 (-)]	ENSDART00000133553	si:dkey-29d5.2	chr1	-	26704718	26708219	26705049	26708219	7	26704718,26705284,26706318,26706606,26707577,26707921,26708101,	26705159,26705464,26706504,26706705,26707695,26708013,26708219,
[ENSDART00000102335 pspc1 chr1:26774853-26830272 (+)]	ENSDART00000102335	pspc1	chr1	+	26774853	26830272	26774980	26829852	9	26774853,26794589,26794979,26795191,26795658,26810877,26826241,26827509,26829639,	26775334,26794891,26795075,26795388,26795743,26810983,26826299,26827637,26830272,
[NM_001031723 DNAJB14 chr1:26837456-26862121 (+), ENSDART00000102337 DNAJB14 chr1:26837430-26863161 (+)]	ENSDART00000102337	DNAJB14	chr1	+	26837430	26863161	26837456	26862354	8	26837430,26845768,26846621,26846872,26853958,26856561,26861952,26862229,	26837589,26845949,26846767,26847061,26854044,26856671,26862125,26863161,
[ENSDART00000026147 SUGT1 chr1:26950020-27000978 (+), ENSDART00000115319 SUGT1 chr1:26959197-27001092 (+)]	ENSDART00000026147	SUGT1	chr1	+	26950020	27000978	26950124	27000615	13	26950020,26950264,26952648,26966682,26975051,26976658,26976805,26977261,26977384,26983663,26987970,26998454,27000513,	26950138,26950313,26952739,26966752,26975122,26976712,26976834,26977281,26977481,26983771,26988061,26998627,27000978,
[ENSDART00000123655 psip1 chr1:27149901-27255466 (+), NM_001140420 psip1 chr1:27205379-27252307 (+)]	ENSDART00000123655	psip1	chr1	+	27149901	27255465	27205379	27255208	15	27149901,27205360,27221080,27221301,27223510,27223729,27237161,27237320,27237498,27251543,27251720,27251924,27252154,27254997,27255177,	27149960,27205451,27221157,27221440,27223594,27223825,27237224,27237399,27237592,27251593,27251779,27252026,27252353,27255094,27255465,
[ENSDART00000148175 LONRF2 chr1:27451829-27488177 (-), ENSDART00000129204 LONRF2 chr1:27450151-27533549 (-)]	ENSDART00000129204	LONRF2	chr1	-	27450150	27533549	27452269	27533549	11	27450150,27452613,27453816,27465155,27482659,27487901,27488087,27488344,27488741,27504963,27533474,	27452428,27452763,27453979,27465314,27482781,27488016,27488175,27488507,27488891,27505086,27533549,
[ENSDART00000121758 ednrb1 chr1:27549860-27562105 (-), NM_001079208 ednrb2 chr1:27559071-27561874 (-)]	ENSDART00000121758	ednrb1	chr1	-	27549858	27562105	27555535	27562105	7	27549858,27559074,27559336,27559646,27560640,27560931,27561676,	27555676,27559183,27559470,27559796,27560845,27561044,27562105,
[ENSDART00000148522 GK chr1:27654716-27680504 (-), ENSDART00000148536 GK chr1:27654940-27762748 (-), ENSDART00000075470 GK chr1:27654941-27762679 (-)]	ENSDART00000075470	GK	chr1	-	27653863	27762679	27655328	27762663	19	27653863,27656415,27680392,27680669,27680925,27681173,27681376,27682046,27682207,27683852,27684090,27702912,27718741,27719129,27737430,27739400,27739571,27739970,27762582,	27655345,27656502,27680536,27680790,27681010,27681270,27681455,27682127,27682250,27683920,27684126,27702979,27718851,27719267,27737510,27739478,27739678,27740044,27762679,
[ENSDART00000075502 C1H3orf1 chr1:27766405-27792063 (-)]	ENSDART00000075502	C1H3orf1	chr1	-	27766409	27792063	27766530	27791625	8	27766409,27766766,27778556,27778783,27787027,27787252,27791404,27791986,	27766678,27766877,27778635,27778851,27787116,27787415,27791632,27792063,
[ENSDART00000075500 poglut1 chr1:27805646-27820094 (-), NM_170040 CG31139 chr1:27805706-27816188 (-)]	ENSDART00000075500	poglut1	chr1	-	27805293	27820094	27805646	27820094	14	27805293,27815741,27816021,27816290,27816575,27816757,27817072,27817436,27817494,27818315,27819218,27819309,27819553,27820018,	27805803,27815798,27816189,27816349,27816675,27816817,27817194,27817455,27817505,27818359,27819263,27819464,27819644,27820094,
[ENSDART00000110270 pwp2h chr1:27829554-27880976 (-), NM_001135528 PWP2 chr1:27830436-27880701 (-)]	ENSDART00000110270	pwp2h	chr1	-	27829555	27880976	27830089	27880890	21	27829555,27830437,27830879,27831131,27831535,27831739,27842903,27844200,27844485,27853815,27854246,27854745,27854962,27857209,27860140,27870506,27874143,27874384,27880377,27880588,27880872,	27830282,27830512,27831030,27831350,27831601,27831848,27843051,27844381,27844636,27853963,27854395,27854882,27855033,27857353,27860406,27870642,27874287,27874484,27880472,27880701,27880976,
[ENSDART00000101911 gpm6ba chr1:27893186-27976033 (-), ENSDART00000019770 gpm6ba chr1:27892262-27976036 (-)]	ENSDART00000101911	gpm6ba	chr1	-	27890333	27976033	27893440	27917195	20	27890333,27891457,27891892,27891989,27892006,27892032,27892064,27892263,27892649,27892919,27892952,27893170,27893178,27894562,27895245,27895547,27909686,27917030,27917147,27975712,	27891456,27891590,27891986,27892005,27892028,27892063,27892145,27892535,27892908,27892952,27893164,27893176,27893593,27894628,27895319,27895716,27909843,27917146,27917217,27976033,
[ENSDART00000053933 GEMIN8 chr1:27988877-27991895 (-), ENSDART00000131124 GEMIN8 chr1:27988881-27991901 (-), ENSDART00000142350 GEMIN8 chr1:27989299-27991897 (-)]	ENSDART00000131124	GEMIN8	chr1	-	27988881	27991901	27989445	27991656	4	27988881,27991106,27991653,27991756,	27989702,27991500,27991719,27991901,
[ENSDART00000053932 cbsa chr1:27999263-28024172 (+)]	ENSDART00000053932	cbsa	chr1	+	27999263	28024171	28001289	28023091	15	27999263,28001272,28008207,28008574,28010367,28010511,28010854,28011127,28011631,28015088,28017779,28018343,28018667,28018862,28022960,	27999294,28001531,28008314,28008709,28010447,28010716,28010946,28011253,28011716,28015194,28017857,28018478,28018776,28018947,28024171,
[NM_012935 Cryab chr1:28027618-28030682 (+), ENSDART00000075539 cryaa chr1:28027490-28031533 (+)]	ENSDART00000075539	cryaa	chr1	+	28027490	28031519	28027621	28030769	3	28027490,28028258,28030562,	28027813,28028381,28031519,
[ENSDART00000113735 cars2 chr1:28114603-28133331 (+), NM_024537 CARS2 chr1:28114966-28126850 (+)]	ENSDART00000113735	cars2	chr1	+	28114603	28133177	28114843	28133036	15	28114603,28115152,28115518,28115742,28115888,28116075,28116367,28120925,28121962,28122157,28122299,28126570,28126802,28132536,28132982,	28115073,28115203,28115636,28115814,28115994,28116156,28116497,28121059,28122030,28122224,28122438,28126694,28126898,28132767,28133177,
[ENSDART00000053924 IRS2 chr1:28142181-28159035 (+), NM_001095193 irs2 chr1:28142405-28145120 (+)]	ENSDART00000053924	IRS2	chr1	+	28142181	28160107	28142336	28158099	2	28142181,28158094,	28145430,28160107,
[ENSDART00000085648 lig4 chr1:28198482-28202115 (+)]	ENSDART00000085648	lig4	chr1	+	28198482	28202100	28199080	28201810	2	28198482,28199065,	28198694,28202100,
[ENSDART00000112106 fam155a chr1:28212405-28321676 (+), NM_001081283 Tmem28 chr1:28212992-28314343 (+)]	ENSDART00000112106	fam155a	chr1	+	28212405	28324687	28212935	28320508	3	28212405,28314169,28320221,	28213622,28314341,28324687,
[ENSDART00000111546 CR774189.1 chr1:28445864-28449638 (+)]	ENSDART00000111546	CR774189.1	chr1	+	28445864	28449870	28445864	28449644	5	28445864,28446798,28447910,28448828,28449525,	28445954,28446964,28448026,28449474,28449870,
[ENSDART00000109224 CCKBR (2 of 2) chr1:28553367-28598712 (-)]	ENSDART00000109224	CCKBR (2 of 2)	chr1	-	28548519	28598712	28553527	28598435	5	28548519,28555312,28563488,28580725,28598275,	28554063,28555440,28563750,28580974,28598712,
[ENSDART00000132063 si:dkey-1h24.6 chr1:28599686-28603961 (-)]	ENSDART00000132063	si:dkey-1h24.6	chr1	-	28599188	28603961	28600133	28603881	4	28599188,28600387,28600613,28603796,	28600274,28600503,28600949,28603961,
[ENSDART00000133225 SPP2 chr1:28688681-28692942 (-)]	ENSDART00000133225	SPP2	chr1	-	28688687	28692942	28689056	28692885	6	28688687,28689275,28689806,28690343,28691761,28692827,	28689184,28689321,28689910,28690470,28691883,28692942,
[ENSDART00000101856 cpb2 chr1:28704917-28709300 (+), ENSDART00000054059 cpb2 chr1:28704917-28709296 (+)]	ENSDART00000101856	cpb2	chr1	+	28704917	28709268	28704939	28708976	10	28704917,28705992,28706291,28706569,28706771,28707073,28708139,28708290,28708606,28708788,	28705016,28706068,28706416,28706678,28706873,28707137,28708178,28708493,28708691,28709268,
[ENSDART00000019743 tm9sf2 chr1:28743379-28769615 (+)]	ENSDART00000019743	tm9sf2	chr1	+	28743379	28769611	28743518	28768680	17	28743379,28746343,28749864,28750458,28751702,28751908,28752179,28753802,28754446,28758477,28760066,28762322,28762555,28762948,28765769,28765984,28768612,	28743674,28746411,28749958,28750586,28751832,28752033,28752291,28753882,28754555,28758610,28760186,28762380,28762715,28763100,28765881,28766156,28769611,
[ENSDART00000054066 zic2b chr1:28803271-28806135 (+), NM_001087724 zic2-a chr1:28803550-28805363 (+)]	ENSDART00000054066	zic2b	chr1	+	28803271	28806254	28803550	28805450	3	28803271,28804978,28805261,	28804481,28805142,28806254,
[ENSDART00000125759 C1H3orf70 (2 of 2) chr1:29331167-29354278 (-)]	ENSDART00000125759	C1H3orf70 (2 of 2)	chr1	-	29331169	29354278	29334847	29354004	2	29331169,29353829,	29335482,29354278,
[ENSDART00000033024 tmem41ab chr1:29409596-29425490 (+), NM_001075200 TMEM41A chr1:29416940-29424421 (+)]	ENSDART00000033024	tmem41ab	chr1	+	29409596	29425489	29409715	29424508	5	29409596,29416939,29417215,29421987,29424278,	29409870,29417090,29417377,29422126,29425489,
[ENSDART00000144297 UBAC2 (2 of 2) chr1:29528002-29534595 (-)]	ENSDART00000144297	UBAC2 (2 of 2)	chr1	-	29526037	29534595	29528002	29534595	3	29526037,29528682,29534349,	29528110,29528811,29534595,
[ENSDART00000140806 UBAC2 (1 of 2) chr1:29595181-29624482 (-), ENSDART00000085514 UBAC2 (1 of 2) chr1:29595192-29624482 (-)]	ENSDART00000085514	UBAC2 (1 of 2)	chr1	-	29593845	29624482	29595724	29624327	9	29593845,29596412,29603243,29605130,29605824,29613795,29615629,29619378,29624296,	29595832,29596541,29603498,29605178,29605948,29613902,29615749,29619506,29624482,
[ENSDART00000018827 dachc chr1:29641396-29745261 (-), NM_001078708 dach1 chr1:29650398-29744844 (-)]	ENSDART00000018827	dachc	chr1	-	29641255	29745261	29642066	29745042	11	29641255,29645501,29650358,29662407,29662646,29674736,29675772,29678190,29697221,29705335,29744494,	29642104,29645567,29650502,29662555,29662792,29674871,29675908,29678363,29697347,29705451,29745261,
[NM_001094711 dis3 chr1:29797908-29818461 (-), ENSDART00000085454 dis3 chr1:29792708-29818461 (-)]	ENSDART00000085454	dis3	chr1	-	29792708	29818461	29793039	29818461	21	29792708,29797905,29798129,29798498,29800599,29803355,29805381,29805565,29805795,29806010,29807620,29807819,29808022,29809203,29811137,29811502,29811764,29812024,29813426,29813764,29818242,	29793108,29798028,29798288,29798667,29800814,29803512,29805468,29805693,29805880,29806075,29807722,29807936,29808169,29809341,29811254,29811664,29811932,29812098,29813620,29813922,29818461,
[ENSDART00000022841 metap1d chr1:30002487-30030422 (+)]	ENSDART00000022841	metap1d	chr1	+	30002487	30030422	30002506	30030339	10	30002487,30012113,30012357,30012619,30018786,30018937,30021213,30022641,30022788,30030260,	30002546,30012280,30012507,30012768,30018829,30019101,30021311,30022689,30022867,30030422,
[ENSDART00000008469 dlx2b chr1:30034192-30035964 (-)]	ENSDART00000008469	dlx2b	chr1	-	30034379	30035964	30034738	30035820	3	30034379,30035188,30035501,	30035065,30035373,30035964,
[NM_008398 Itga7 chr1:30075528-30119903 (+), ENSDART00000102210 itga6b chr1:30075421-30120963 (+)]	ENSDART00000102210	itga6b	chr1	+	30075421	30120970	30075498	30120044	25	30075421,30090475,30090679,30092772,30094623,30097569,30098306,30098633,30098810,30099480,30099659,30099823,30106998,30108578,30109230,30109761,30110666,30110963,30111130,30113207,30113501,30116233,30117579,30117801,30119879,	30075671,30090603,30090759,30093034,30094755,30097783,30098500,30098722,30098938,30099576,30099721,30099987,30107145,30108694,30109384,30109845,30110746,30111041,30111233,30113381,30113600,30116344,30117678,30117927,30120970,
[ENSDART00000137863 eef1a1 chr1:30167073-30186479 (+), ENSDART00000075340 eef1a1 chr1:30168739-30186478 (+)]	ENSDART00000075340	eef1a1	chr1	+	30168739	30186478	30170224	30185840	8	30168739,30170195,30173527,30173790,30174904,30175407,30178721,30185715,	30168795,30170368,30173707,30174087,30175055,30175664,30178956,30186478,
[ENSDART00000085370 kcnq5b chr1:30191199-30406008 (-), ENSDART00000148069 kcnq5b chr1:30191219-30245075 (-)]	ENSDART00000148069	kcnq5b	chr1	-	30191199	30245075	30191935	30245075	13	30191199,30196254,30202519,30205277,30210549,30217295,30218149,30222456,30223044,30226937,30227274,30236906,30244984,	30193069,30196381,30202651,30205386,30210770,30217322,30218244,30222552,30223155,30227063,30227450,30237033,30245075,
[ENSDART00000006357 CU914627.1 chr1:30418457-30430072 (-)]	ENSDART00000006357	CU914627.1	chr1	-	30417738	30430072	30418442	30430072	5	30417738,30422351,30422648,30424168,30429902,	30418667,30422491,30422750,30424275,30430072,
[ENSDART00000059762 INHBE chr1:30609326-30615423 (+)]	ENSDART00000059762	INHBE	chr1	+	30609326	30618519	30609326	30615423	2	30609326,30614671,	30609714,30618519,
[ENSDART00000049151 gli1 chr1:30667485-30744303 (+), ENSDART00000123101 gli1 chr1:30726796-30746919 (+)]	ENSDART00000123101	gli1	chr1	+	30726796	30746923	30726796	30744127	12	30726796,30730054,30733041,30733718,30734754,30736739,30738755,30740208,30740452,30740909,30741339,30741740,	30726867,30730257,30733140,30733917,30734899,30736847,30738893,30740358,30740617,30741146,30741652,30746923,
[ENSDART00000075286 slc2a15b chr1:31027196-31052389 (+), NM_001127842 slc2a9-a chr1:31030700-31052035 (+)]	ENSDART00000075286	slc2a15b	chr1	+	31027196	31052379	31027326	31052179	12	31027196,31030697,31032641,31033271,31037349,31039516,31047187,31047469,31048616,31049795,31050240,31051921,	31027368,31030796,31032802,31033396,31037495,31039649,31047375,31047580,31048718,31049871,31050368,31052379,
[ENSDART00000057885 fgf8b chr1:31092245-31097474 (+)]	ENSDART00000057885	fgf8b	chr1	+	31092245	31097464	31092729	31096276	5	31092245,31092852,31094032,31095543,31096000,	31092761,31092889,31094219,31095650,31097464,
[ENSDART00000057880 poll chr1:31111813-31126315 (+), ENSDART00000127666 poll chr1:31111742-31126225 (+)]	ENSDART00000057880	poll	chr1	+	31111813	31126225	31111988	31125999	9	31111813,31111964,31113900,31114857,31115059,31116777,31118777,31121337,31125637,	31111874,31112109,31114198,31114981,31115383,31116951,31118906,31121506,31126225,
[ENSDART00000044214 C1H10orf26 (2 of 2) chr1:31128268-31153927 (+), NM_001193407 wbp1 chr1:31140470-31153348 (+)]	ENSDART00000044214	C1H10orf26 (2 of 2)	chr1	+	31128268	31157245	31128475	31153600	4	31128268,31140458,31143975,31152920,	31128535,31140561,31144137,31157245,
[ENSDART00000057879 as3mt chr1:31160639-31176847 (+)]	ENSDART00000057879	as3mt	chr1	+	31160639	31176839	31160657	31176701	11	31160639,31160931,31161145,31163431,31165778,31166091,31166273,31166804,31169596,31170353,31176596,	31160674,31160968,31161273,31163582,31165915,31166161,31166355,31166936,31169739,31170485,31176839,
[ENSDART00000112333 cnnm2b chr1:31178765-31253331 (+), NM_001102471 Cnnm2 chr1:31179391-31251484 (+)]	ENSDART00000112333	cnnm2b	chr1	+	31178765	31253329	31179272	31251550	7	31178765,31232964,31236552,31243070,31243473,31247845,31251337,	31180758,31233108,31236690,31243240,31243567,31248024,31253329,
[ENSDART00000065125 nt5c2b chr1:31263156-31310602 (-), ENSDART00000126286 nt5c2b chr1:31260663-31307517 (-)]	ENSDART00000126286	nt5c2b	chr1	-	31260663	31307517	31263305	31307517	17	31260663,31267182,31268741,31271526,31272157,31272753,31275117,31275309,31277427,31277594,31284253,31285011,31287882,31288060,31288266,31300881,31307413,	31263542,31267359,31268802,31271578,31272328,31272820,31275225,31275351,31277511,31277648,31284347,31285069,31287974,31288156,31288384,31300955,31307517,
[ENSDART00000075260 inab chr1:31318462-31324554 (+), NM_001086482 MGC68885 chr1:31318164-31320998 (+)]	ENSDART00000075260	inab	chr1	+	31318462	31324554	31318462	31321214	3	31318462,31320644,31320961,	31319494,31320769,31324554,
[NM_001104849 kal1.1 chr1:31397040-31432244 (+), ENSDART00000007522 kal1a chr1:31396988-31433511 (+)]	ENSDART00000007522	kal1a	chr1	+	31396988	31434094	31397019	31433136	14	31396988,31401596,31414767,31416188,31421095,31422062,31422742,31425645,31425935,31427489,31428081,31429435,31432127,31433086,	31397199,31401644,31414830,31416411,31421280,31422192,31422939,31425787,31426052,31427578,31428253,31429653,31432272,31434094,
[ENSDART00000128317 nlgn4a chr1:32080645-32244350 (+), ENSDART00000113818 nlgn4a chr1:32080645-32244350 (+)]	ENSDART00000128317	nlgn4a	chr1	+	32080645	32245995	32080645	32244350	6	32080645,32113502,32129693,32207834,32221331,32243461,	32081108,32113553,32129846,32208020,32222121,32245995,
[NM_001033963 Prkx chr1:32905216-32934442 (+), ENSDART00000136761 prkx chr1:32883162-32948941 (+)]	ENSDART00000136761	prkx	chr1	+	32883162	32948940	32883703	32945699	8	32883162,32905217,32910188,32922914,32934357,32939171,32942714,32945573,	32883866,32905386,32910452,32923034,32934453,32939229,32942792,32948940,
[ENSDART00000102198 cd99 chr1:33020652-33045240 (-), ENSDART00000136383 cd99 chr1:33020649-33045276 (-), ENSDART00000141347 cd99 chr1:33021426-33045263 (-)]	ENSDART00000102198	cd99	chr1	-	33020652	33045240	33021719	33045085	15	33020652,33022240,33022971,33031596,33031760,33037894,33039290,33039887,33040328,33040705,33040970,33041133,33041359,33045024,33045191,	33021748,33022291,33023079,33031617,33031796,33037975,33039338,33039920,33040352,33040747,33041000,33041184,33041404,33045089,33045240,
[ENSDART00000075632 creb1 chr1:33180212-33190596 (-)]	ENSDART00000075632	creb1	chr1	-	33179768	33190596	33181089	33189067	8	33179768,33182471,33186187,33186913,33188366,33188676,33188977,33190416,	33181234,33182622,33186370,33187053,33188467,33188823,33189076,33190596,
[ENSDART00000125682 chmp2bl chr1:33191230-33201916 (+), ENSDART00000018472 chmp2bl chr1:33191235-33201926 (+)]	ENSDART00000018472	chmp2bl	chr1	+	33191235	33201024	33191377	33200727	6	33191235,33191829,33194177,33197284,33198010,33200613,	33191411,33191921,33194372,33197387,33198117,33201024,
[ENSDART00000114384 ZNF654 chr1:33280362-33296386 (+)]	ENSDART00000114384	ZNF654	chr1	+	33280362	33296386	33280373	33295265	9	33280362,33281330,33286168,33286411,33286657,33287704,33287927,33288209,33295254,	33280499,33281476,33286250,33286547,33286860,33287841,33288069,33292071,33296386,
[ENSDART00000023768 NSUN3 chr1:33329895-33355459 (+), ENSDART00000131664 NSUN3 chr1:33329850-33355461 (+)]	ENSDART00000023768	NSUN3	chr1	+	33329895	33355016	33329935	33355002	6	33329895,33330232,33330883,33334004,33350175,33354734,	33330022,33330345,33331242,33334159,33350297,33355016,
[ENSDART00000046094 arl6 chr1:33836538-33866619 (+), ENSDART00000123118 arl6 chr1:33857936-33866618 (+)]	ENSDART00000123118	arl6	chr1	+	33857936	33866618	33857936	33864919	7	33857936,33858171,33858816,33858988,33859186,33862906,33864893,	33858059,33858233,33858885,33859083,33859316,33862962,33866618,
[ENSDART00000075584 kctd12.2 chr1:33928605-33930081 (+)]	ENSDART00000075584	kctd12.2	chr1	+	33928605	33930081	33928657	33929473	1	33928605,	33930081,
[ENSDART00000012873 klf12a chr1:34129535-34189404 (+)]	ENSDART00000012873	klf12a	chr1	+	34129535	34189398	34160493	34188276	6	34129535,34160477,34172933,34178818,34185771,34188082,	34129748,34160559,34173498,34178957,34185929,34189398,
[ENSDART00000004361 klf5a chr1:34226170-34245294 (-)]	ENSDART00000004361	klf5a	chr1	-	34226590	34245294	34230367	34245172	4	34226590,34234501,34239872,34245001,	34230546,34234561,34240752,34245294,
[ENSDART00000037986 zgc:91844 chr1:34318085-34327046 (+)]	ENSDART00000037986	zgc:91844	chr1	+	34318085	34327045	34318226	34326704	8	34318085,34318870,34321035,34321252,34321492,34324303,34324596,34326485,	34318305,34319000,34321158,34321393,34321751,34324468,34324698,34327045,
[ENSDART00000102118 gtf2f2a chr1:34328058-34339584 (+), ENSDART00000135528 gtf2f2a chr1:34328069-34339360 (+), ENSDART00000150038 gtf2f2a chr1:34333824-34339502 (+), ENSDART00000077744 gtf2f2a chr1:34328053-34339444 (+)]	ENSDART00000150038	gtf2f2a	chr1	+	34333824	34339582	34334230	34339237	4	34333824,34335635,34335818,34339117,	34334334,34335735,34335962,34339582,
[ENSDART00000045414 KCTD15 chr1:35076911-35117056 (+)]	ENSDART00000045414	KCTD15	chr1	+	35076911	35121667	35076911	35117056	8	35076911,35078302,35081381,35089664,35093633,35105521,35108225,35116894,	35077087,35078319,35081433,35089698,35093659,35105535,35108536,35121667,
[ENSDART00000109678 USP38 chr1:35183732-35196266 (+)]	ENSDART00000109678	USP38	chr1	+	35183732	35196852	35183732	35196266	13	35183732,35187599,35187886,35187978,35188154,35188493,35189074,35189802,35190551,35190784,35192373,35193205,35196101,	35184417,35187735,35187899,35187990,35188259,35188595,35189233,35189996,35190645,35190891,35193163,35193652,35196852,
[ENSDART00000053806 gab1 chr1:35203451-35317473 (+), ENSDART00000101740 gab1 chr1:35203532-35317772 (+), ENSDART00000140724 gab1 chr1:35202951-35317774 (+)]	ENSDART00000101740	gab1	chr1	+	35203532	35317777	35203532	35316035	11	35203532,35270055,35285379,35290919,35294661,35295364,35298667,35305637,35306251,35309117,35315879,	35203604,35270353,35285605,35291563,35294756,35295668,35298751,35305731,35306375,35309243,35317777,
[ENSDART00000114228 frem3 chr1:35322204-35361833 (-), ENSDART00000142154 frem3 chr1:35322203-35361675 (-)]	ENSDART00000114228	frem3	chr1	-	35322204	35361833	35322781	35361833	24	35322204,35323400,35325585,35325880,35327079,35327329,35328669,35328957,35331387,35331812,35333009,35333566,35335952,35336246,35336528,35336784,35338020,35338383,35340599,35341387,35341773,35344706,35356602,35356804,	35323303,35323547,35325773,35326007,35327214,35327457,35328774,35329150,35331719,35331944,35333313,35333725,35336083,35336429,35336693,35336982,35338230,35338533,35340851,35341513,35342004,35344853,35356692,35361833,
[ENSDART00000085051 hhip chr1:35498196-35543978 (+)]	ENSDART00000085051	hhip	chr1	+	35498196	35543979	35498606	35541895	13	35498196,35501793,35508508,35511012,35518227,35519859,35520155,35521778,35523098,35523813,35526694,35541450,35541698,	35498876,35501986,35508650,35511214,35518379,35520033,35520299,35521900,35523222,35523944,35526776,35541599,35543979,
[ENSDART00000125043 smad1 chr1:35605159-35637026 (-), ENSDART00000033566 smad1 chr1:35605158-35637057 (-)]	ENSDART00000125043	smad1	chr1	-	35605159	35637026	35606531	35623897	7	35605159,35610243,35611112,35615906,35616449,35623497,35637007,	35606675,35610503,35611334,35616023,35616728,35624077,35637026,
[ENSDART00000037516 znf827 chr1:35725789-35859492 (-), NM_178267 Zfp827 chr1:35729393-35859322 (-)]	ENSDART00000037516	znf827	chr1	-	35725982	35859492	35730612	35859292	14	35725982,35730610,35737720,35740350,35744744,35746988,35761406,35761593,35765239,35786516,35812916,35818496,35826517,35859249,	35730264,35730661,35737898,35740548,35745083,35747126,35761507,35761648,35765479,35786744,35813415,35818669,35827729,35859492,
[ENSDART00000053773 lsm6 chr1:35902875-35912115 (+), ENSDART00000147458 lsm6 chr1:35902895-35912114 (+)]	ENSDART00000147458	lsm6	chr1	+	35902895	35912114	35903290	35911926	4	35902895,35903285,35908019,35911891,	35903185,35903384,35908133,35912114,
[ENSDART00000124112 pou4f2 chr1:36145050-36148416 (+)]	ENSDART00000124112	pou4f2	chr1	+	36145050	36148372	36145321	36146779	2	36145050,36145846,	36145543,36148372,
[NM_001008468 TMEM34 chr1:36430587-36443355 (+), ENSDART00000111566 TMEM184C chr1:36430236-36450483 (+)]	ENSDART00000111566	TMEM184C	chr1	+	36430236	36450482	36430587	36445941	10	36430236,36432053,36433133,36433460,36436393,36438641,36440781,36442781,36443181,36445642,	36430704,36432184,36433170,36433666,36436468,36438735,36440894,36442881,36443353,36450482,
[ENSDART00000053818 nr3c2 chr1:36643723-36796455 (-), ENSDART00000125011 nr3c2 chr1:36644017-36792890 (-), ENSDART00000129932 nr3c2 chr1:36643723-36936660 (-)]	ENSDART00000125011	nr3c2	chr1	-	36637058	36792890	36644017	36792890	11	36637058,36646773,36661440,36665870,36671805,36677635,36708949,36724583,36744419,36758439,36791127,	36644173,36646931,36661571,36666015,36672120,36677752,36709048,36724599,36744431,36758452,36792890,
[ENSDART00000075216 FAM193A chr1:37162967-37212687 (+)]	ENSDART00000075216	FAM193A	chr1	+	37162967	37212676	37162967	37211754	23	37162967,37170699,37172861,37177017,37177265,37180635,37183523,37185865,37186100,37186266,37188280,37189826,37192630,37192896,37194988,37197521,37200620,37203186,37203532,37205934,37209030,37209954,37211660,	37163111,37170768,37173101,37177187,37177433,37180867,37183648,37186013,37186175,37186344,37188399,37190063,37192763,37193040,37195255,37197735,37200845,37203385,37203719,37206171,37209874,37210036,37212676,
[NM_001165345 tnip2 chr1:37223704-37227754 (-), ENSDART00000113542 TNIP2 chr1:37223710-37227925 (-)]	ENSDART00000113542	TNIP2	chr1	-	37222645	37227925	37223704	37227925	6	37222645,37225932,37226182,37226637,37226815,37227568,	37223950,37226049,37226461,37226727,37227109,37227925,
[ENSDART00000127579 scpp1 chr1:37231109-37233939 (-)]	ENSDART00000127579	scpp1	chr1	-	37229765	37233939	37231205	37233770	9	37229765,37231726,37232641,37232786,37232927,37233425,37233589,37233716,37233877,	37231646,37231792,37232680,37232822,37232957,37233488,37233637,37233771,37233939,
[ENSDART00000083593 sparcl1 chr1:37241623-37268289 (+), NM_001104901 sparcl1 chr1:37255113-37268081 (+)]	ENSDART00000083593	sparcl1	chr1	+	37241623	37268643	37242456	37268269	11	37241623,37242454,37248028,37249816,37255107,37255517,37258110,37261189,37261518,37267936,37268240,	37241702,37242510,37248091,37250710,37255210,37255639,37258231,37261326,37261667,37268085,37268643,
[ENSDART00000146520 si:ch211-76m11.7 chr1:37700407-37711117 (-)]	ENSDART00000146520	si:ch211-76m11.7	chr1	-	37699934	37711117	37700390	37711116	6	37699934,37700559,37704795,37705022,37705859,37711061,	37700449,37700748,37704903,37705070,37705937,37711117,
[ENSDART00000132318 si:dkeyp-13d11.2 chr1:38110626-38113549 (+), ENSDART00000108599 si:dkeyp-13d11.2 chr1:38110682-38113173 (+)]	ENSDART00000132318	si:dkeyp-13d11.2	chr1	+	38110626	38113565	38110626	38113173	5	38110626,38110983,38111409,38111641,38112702,	38110855,38111091,38111509,38111755,38113565,
[ENSDART00000139448 GALNTL6 chr1:38161656-38541181 (+), ENSDART00000058574 GALNTL6 chr1:38162492-38540523 (+)]	ENSDART00000139448	GALNTL6	chr1	+	38161656	38541184	38162492	38540523	13	38161656,38162387,38255050,38273742,38289379,38469998,38483595,38515366,38520183,38522013,38534734,38535014,38540355,	38162095,38162627,38255159,38273881,38289546,38470184,38483779,38515484,38520291,38522235,38534851,38535164,38541184,
[ENSDART00000020409 hand2 chr1:38602512-38604378 (-)]	ENSDART00000020409	hand2	chr1	-	38602518	38604378	38603045	38603888	2	38602518,38603369,	38603144,38604378,
[ENSDART00000015323 fbxo8 chr1:38755408-38770862 (-), ENSDART00000129583 fbxo8 chr1:38754026-38765750 (-)]	ENSDART00000129583	fbxo8	chr1	-	38754026	38765750	38756029	38765750	5	38754026,38761175,38762645,38763294,38765409,	38756217,38761372,38762764,38763421,38765750,
[ENSDART00000018533 HPGD chr1:38808061-38824488 (-)]	ENSDART00000018533	HPGD	chr1	-	38808061	38824488	38808471	38824488	7	38808061,38811851,38812256,38822158,38822633,38824082,38824395,	38808595,38812015,38812333,38822255,38822740,38824206,38824488,
[ENSDART00000009777 GLRA3 chr1:38827488-38873612 (-)]	ENSDART00000009777	GLRA3	chr1	-	38825636	38873612	38827488	38873612	17	38825636,38836177,38838419,38850806,38855972,38856778,38857423,38859324,38859868,38860058,38860356,38861955,38863167,38866210,38866384,38866938,38873473,	38827764,38836327,38838634,38850944,38856055,38856813,38857432,38859333,38859888,38860091,38860361,38861979,38863221,38866230,38866402,38867006,38873612,
[ENSDART00000110824 WDR17 chr1:39130727-39156856 (+), ENSDART00000136300 WDR17 chr1:39112878-39157082 (+)]	ENSDART00000110824	WDR17	chr1	+	39130727	39158373	39130727	39156856	29	39130727,39132593,39133029,39134897,39135659,39137037,39138922,39139212,39139677,39139873,39140062,39141412,39145648,39145878,39146095,39146355,39148241,39148392,39148642,39148815,39150154,39150519,39151763,39152007,39153939,39154152,39154340,39156464,39156736,	39130850,39132771,39133260,39135149,39135782,39137225,39139091,39139304,39139760,39139960,39140227,39141615,39145798,39146015,39146221,39146511,39148306,39148525,39148734,39148915,39150294,39150540,39151875,39152149,39154042,39154254,39154436,39156654,39158373,
[ENSDART00000129714 spcs3 chr1:39172749-39176597 (+), NM_029541 Arxes1 chr1:39172838-39174686 (+)]	ENSDART00000129714	spcs3	chr1	+	39172749	39176599	39172838	39176520	5	39172749,39173403,39174355,39174572,39176387,	39172981,39173479,39174430,39174688,39176599,
[ENSDART00000053763 dctd chr1:40175764-40221985 (-), NM_001161515 Dctd chr1:39959911-40216003 (-)]	ENSDART00000053763	dctd	chr1	-	40176420	40221985	40176474	40221881	6	40176420,40186495,40202531,40211475,40215913,40221840,	40176577,40186592,40202648,40211611,40216025,40221985,
[ENSDART00000135791 TMEM134 chr1:40245750-40258387 (-), ENSDART00000035739 TMEM134 chr1:40245068-40258446 (-)]	ENSDART00000035739	TMEM134	chr1	-	40245071	40258446	40245832	40254781	8	40245071,40249116,40251095,40251349,40251561,40254422,40254574,40258248,	40245915,40249170,40251140,40251426,40251648,40254490,40254825,40258446,
[ENSDART00000149730 stox2 chr1:40260854-40306124 (-), ENSDART00000139354 stox2 chr1:40264071-40340079 (-), ENSDART00000102735 stox2 chr1:40264378-40275035 (-)]	ENSDART00000149730	stox2	chr1	-	40261120	40306124	40264378	40306124	4	40261120,40269558,40274881,40305946,	40264580,40272058,40275034,40306124,
[ENSDART00000005775 ing2 chr1:40343978-40346258 (-), ENSDART00000110880 ing2 chr1:40343979-40377036 (-)]	ENSDART00000110880	ing2	chr1	-	40343981	40377036	40344521	40376896	2	40343981,40376757,	40345219,40377036,
[ENSDART00000132436 sod3 chr1:40383063-40384231 (+)]	ENSDART00000132436	sod3	chr1	+	40383063	40384541	40383459	40384038	2	40383063,40383451,	40383173,40384541,
[ENSDART00000016877 aip chr1:40389193-40401983 (+), NM_001140060 aip chr1:40357598-40371550 (+), ENSDART00000101617 aip chr1:40357601-40401966 (+)]	ENSDART00000016877	aip	chr1	+	40389193	40401985	40389267	40401295	7	40389193,40392330,40394935,40395256,40398477,40400960,40401289,	40389366,40392513,40395124,40395433,40398619,40401193,40401985,
[ENSDART00000101623 lgi2b chr1:40416157-40421377 (+), ENSDART00000113109 lgi2b chr1:40416054-40422389 (+)]	ENSDART00000113109	lgi2b	chr1	+	40416054	40422389	40416054	40421356	8	40416054,40416578,40416815,40417045,40417351,40420000,40420294,40420538,	40416374,40416650,40416887,40417117,40417423,40420170,40420459,40422389,
[ENSDART00000125414 ccdc149b chr1:40426694-40444866 (+), ENSDART00000011727 ccdc149b chr1:40426578-40445530 (+)]	ENSDART00000011727	ccdc149b	chr1	+	40426578	40445526	40429042	40444866	13	40426578,40428940,40431616,40433735,40433959,40434615,40436632,40436813,40437006,40439349,40439568,40439739,40444297,	40426745,40429102,40431655,40433843,40434076,40434788,40436705,40436898,40437154,40439426,40439601,40439826,40445526,
[ENSDART00000136990 si:dkey-117m1.4 chr1:40449929-40479496 (-)]	ENSDART00000136990	si:dkey-117m1.4	chr1	-	40447509	40479496	40450127	40479471	9	40447509,40452948,40453235,40455044,40456741,40458735,40459925,40462682,40479379,	40450378,40453146,40454053,40455973,40456810,40458922,40460001,40462792,40479496,
[ENSDART00000109096 si:dkey-117m1.3 chr1:40488010-40495091 (-), ENSDART00000147317 si:dkey-117m1.3 chr1:40487640-40495354 (-)]	ENSDART00000109096	si:dkey-117m1.3	chr1	-	40484732	40495091	40488010	40495091	3	40484732,40488280,40494980,	40488193,40488574,40495091,
[ENSDART00000113954 si:ch211-113e8.11 chr1:40500328-40507760 (+)]	ENSDART00000113954	si:ch211-113e8.11	chr1	+	40500328	40506210	40500434	40504760	2	40500328,40504138,	40500508,40506210,
[ENSDART00000101640 zgc:152658 chr1:40533015-40539300 (+)]	ENSDART00000101640	zgc:152658	chr1	+	40533015	40539299	40533053	40537555	4	40533015,40536343,40536567,40536716,	40533072,40536462,40536610,40539299,
[ENSDART00000109892 AL953865.2 chr1:40568933-40569953 (+)]	ENSDART00000109892	AL953865.2	chr1	+	40568933	40573015	40568933	40570310	2	40568933,40569476,	40569377,40573015,
[ENSDART00000136849 si:ch211-113e8.5 chr1:40591600-40593658 (+), ENSDART00000101649 si:ch211-113e8.5 chr1:40591623-40593200 (+)]	ENSDART00000136849	si:ch211-113e8.5	chr1	+	40591600	40593653	40592666	40593200	2	40591600,40592240,	40591689,40593653,
[ENSDART00000112133 TESK1 (1 of 2) chr1:40601009-40618639 (-), ENSDART00000146680 TESK1 (1 of 2) chr1:40603357-40619684 (-)]	ENSDART00000112133	TESK1 (1 of 2)	chr1	-	40601009	40618639	40603940	40618639	10	40601009,40607175,40607383,40609510,40609675,40611714,40611983,40612207,40613871,40618462,	40604977,40607272,40607470,40609594,40609766,40611797,40612130,40612256,40613993,40618639,
[ENSDART00000077796 AL953865.1 chr1:40624551-40625726 (+)]	ENSDART00000077796	AL953865.1	chr1	+	40624551	40625937	40624551	40625747	5	40624551,40624739,40624892,40625370,40625640,	40624629,40624790,40625271,40625553,40625937,
[ENSDART00000037553 faah2a chr1:40629793-40650948 (+)]	ENSDART00000037553	faah2a	chr1	+	40629793	40650937	40629852	40650254	11	40629793,40632458,40632611,40634520,40635406,40635620,40640639,40640844,40641808,40644555,40650066,	40630038,40632541,40632748,40634730,40635526,40635756,40640757,40640964,40641920,40644744,40650937,
[NM_001132431 TXN chr1:40659059-40659306 (+), ENSDART00000045697 zgc:56493 chr1:40656188-40663079 (+)]	ENSDART00000045697	zgc:56493	chr1	+	40656188	40663072	40656308	40662842	5	40656188,40659046,40659240,40662554,40662776,	40656332,40659151,40659306,40662620,40663072,
[ENSDART00000138992 si:dkey-27f16.4 chr1:40700594-40722159 (+), ENSDART00000101664 si:dkey-27f16.4 chr1:40700980-40721706 (+)]	ENSDART00000138992	si:dkey-27f16.4	chr1	+	40700594	40721960	40700980	40721706	16	40700594,40700961,40703334,40704143,40708358,40708599,40711862,40714546,40714840,40715042,40716721,40716957,40717616,40719236,40719620,40721166,	40700773,40701178,40703625,40704237,40708478,40708786,40712032,40714659,40714957,40715252,40716854,40717110,40717703,40719502,40719914,40721960,
[ENSDART00000122059 scoc chr1:40955057-40962131 (+), ENSDART00000135578 scoc chr1:40959515-40961268 (+), ENSDART00000137047 scoc chr1:40959495-40961345 (+)]	ENSDART00000135578	scoc	chr1	+	40959515	40965267	40960275	40960870	4	40959515,40960222,40960487,40960727,	40959672,40960294,40960565,40965267,
[ENSDART00000101671 clgn chr1:40965274-41000910 (-)]	ENSDART00000101671	clgn	chr1	-	40965276	41000910	40966161	41000734	15	40965276,40983466,40983688,40986661,40986875,40989753,40993420,40993951,40996118,40996471,40996651,40998158,40999047,41000031,41000734,	40966242,40983600,40983848,40986778,40987091,40989910,40993534,40994141,40996311,40996553,40996793,40998217,40999121,41000205,41000910,
[ENSDART00000127907 CABZ01072534.2 chr1:41067044-41078571 (-)]	ENSDART00000127907	CABZ01072534.2	chr1	-	41067044	41078571	41067317	41078571	22	41067044,41067529,41068758,41068898,41069195,41069566,41069701,41070336,41070513,41070738,41070997,41072321,41072523,41072676,41072899,41073157,41073305,41073544,41077895,41078105,41078348,41078498,	41067413,41067770,41068820,41069020,41069377,41069612,41069826,41070398,41070635,41070908,41071070,41072422,41072585,41072798,41073054,41073206,41073406,41073606,41078017,41078260,41078397,41078571,
[ENSDART00000093269 zgc:153642 chr1:41130700-41132161 (-)]	ENSDART00000093269	zgc:153642	chr1	-	41130764	41132161	41131291	41132126	2	41130764,41132098,	41132007,41132161,
[NM_138841 Gpr26 chr1:41175886-41177907 (+), ENSDART00000111656 GPR78 (2 of 2) chr1:41175366-41178331 (+)]	ENSDART00000111656	GPR78 (2 of 2)	chr1	+	41175366	41178302	41175670	41178000	3	41175366,41176427,41177738,	41176344,41176541,41178302,
[ENSDART00000109165 CPZ chr1:41182654-41201686 (+), ENSDART00000147497 CPZ chr1:41182667-41199872 (+)]	ENSDART00000109165	CPZ	chr1	+	41182654	41201690	41182654	41199104	11	41182654,41183525,41185716,41188057,41190556,41192774,41194102,41194337,41195219,41197182,41198757,	41182796,41183555,41186091,41188273,41190792,41192936,41194264,41194473,41195359,41197282,41201690,
[ENSDART00000027463 hmx4 chr1:41290721-41292304 (-), NM_001104865 LOC100049513 chr1:41291419-41291731 (-)]	ENSDART00000027463	hmx4	chr1	-	41290724	41292304	41291347	41292172	2	41290724,41291967,	41291859,41292304,
[ENSDART00000113087 hmx1 chr1:41293584-41295724 (-), NM_001085757 hmx3 chr1:41294115-41294370 (-)]	ENSDART00000113087	hmx1	chr1	-	41293587	41295724	41293965	41295399	2	41293587,41295143,	41294558,41295724,
[ENSDART00000101562 adra2c chr1:41373858-41375231 (-)]	ENSDART00000101562	adra2c	chr1	-	41372860	41375231	41373890	41375189	1	41372860,	41375231,
[ENSDART00000145272 lrpap1 chr1:41512452-41522418 (+), ENSDART00000043552 lrpap1 chr1:41512495-41522415 (+)]	ENSDART00000043552	lrpap1	chr1	+	41512495	41522411	41512654	41521493	8	41512495,41513196,41514851,41515086,41516895,41517137,41519604,41521424,	41512768,41513341,41514982,41515207,41517051,41517220,41519781,41522411,
[ENSDART00000084665 dok7 chr1:41524565-41573031 (-), ENSDART00000135369 dok7 chr1:41523852-41573178 (-)]	ENSDART00000084665	dok7	chr1	-	41522475	41573031	41524565	41573031	11	41522475,41526892,41527135,41529119,41536669,41539399,41546794,41561014,41568795,41572813,41572977,	41524705,41527039,41527216,41529159,41537493,41539507,41546914,41561215,41569026,41572859,41573031,
[ENSDART00000074777 htt chr1:41674935-41755089 (-)]	ENSDART00000074777	htt	chr1	-	41674936	41755089	41676349	41755089	67	41674936,41678401,41679172,41679417,41681004,41683241,41685734,41686000,41690127,41690381,41690623,41690993,41692889,41693117,41693461,41693678,41695624,41695800,41697069,41699137,41701529,41701737,41701963,41705020,41705277,41708341,41711241,41711528,41712502,41713948,41714190,41714402,41715600,41716065,41716220,41718216,41718388,41718695,41718869,41720829,41721091,41721334,41723379,41723680,417…	41676563,41678562,41679335,41679523,41681236,41683356,41685925,41686156,41690260,41690512,41690706,41691133,41693044,41693221,41693588,41693863,41695708,41695978,41697215,41699348,41701652,41701876,41702040,41705197,41705457,41708477,41711452,41711671,41712756,41714071,41714307,41714539,41715749,41716121,41716382,41718295,41718612,41718773,41718980,41720954,41721218,41721537,41723531,41723826,417…
[ENSDART00000148251 si:ch211-89o9.4 chr1:41835181-41844979 (+)]	ENSDART00000148251	si:ch211-89o9.4	chr1	+	41835181	41844640	41835470	41844568	8	41835181,41840456,41842199,41842805,41843776,41844011,41844123,41844397,	41835532,41841352,41842486,41842946,41843902,41844053,41844258,41844640,
[ENSDART00000139175 si:dkey-56e3.2 chr1:41970689-41975966 (+)]	ENSDART00000139175	si:dkey-56e3.2	chr1	+	41970689	41975964	41970689	41975516	4	41970689,41970886,41975018,41975420,	41970805,41970942,41975253,41975964,
[ENSDART00000111367 si:dkey-56e3.3 chr1:41978618-41988629 (+)]	ENSDART00000111367	si:dkey-56e3.3	chr1	+	41978618	41988629	41978634	41988191	8	41978618,41979130,41981710,41982772,41982956,41984132,41985187,41987403,	41978971,41979240,41981828,41982870,41983059,41984224,41985269,41988629,
[ENSDART00000132189 mogs chr1:41991773-41999628 (+), ENSDART00000084708 mogs chr1:41992195-41999624 (+)]	ENSDART00000084708	mogs	chr1	+	41992195	41999624	41992244	41999303	4	41992195,41992693,41994584,41997544,	41992593,41992917,41994778,41999624,
[ENSDART00000109638 EGR4 (2 of 2) chr1:42011512-42013926 (+)]	ENSDART00000109638	EGR4 (2 of 2)	chr1	+	42011512	42015350	42011512	42013938	5	42011512,42012732,42012985,42013220,42013445,	42011536,42012895,42013193,42013334,42015350,
[ENSDART00000113650 FBXO41 chr1:42072921-42137659 (+), ENSDART00000145789 FBXO41 chr1:42049130-42138019 (+)]	ENSDART00000113650	FBXO41	chr1	+	42072921	42143493	42072921	42137659	12	42072921,42098140,42106525,42113023,42123942,42126521,42129864,42130392,42130709,42133256,42133587,42137596,	42073640,42098345,42106599,42113385,42124178,42126637,42130017,42130488,42130828,42133415,42133703,42143493,
[ENSDART00000053685 smox chr1:42231671-42248506 (+)]	ENSDART00000053685	smox	chr1	+	42231671	42248504	42236839	42248137	7	42231671,42236812,42238685,42241148,42242140,42244925,42247987,	42231875,42237047,42238912,42241322,42242840,42245086,42248504,
[ENSDART00000014678 ADRA1D chr1:42339729-42365102 (-)]	ENSDART00000014678	ADRA1D	chr1	-	42340465	42365102	42343574	42364780	2	42340465,42363858,	42344128,42365102,
[ENSDART00000133917 lrrtm1 chr1:43159072-43161595 (-), ENSDART00000074618 lrrtm1 chr1:43159461-43161030 (-)]	ENSDART00000074618	lrrtm1	chr1	-	43157305	43161030	43159461	43161030	1	43157305,	43161030,
[ENSDART00000074609 suclg1 chr1:44034999-44067104 (-)]	ENSDART00000074609	suclg1	chr1	-	44035001	44067104	44035336	44067038	9	44035001,44041596,44052596,44052842,44055403,44057844,44058783,44064907,44067004,	44035363,44041785,44052748,44052926,44055461,44058057,44058900,44065008,44067104,
[ENSDART00000074600 si:dkey-162b23.4 chr1:44077552-44094640 (-), NM_178877 Nhedc2 chr1:44081987-44091034 (-)]	ENSDART00000074600	si:dkey-162b23.4	chr1	-	44074881	44094640	44078054	44094585	12	44074881,44081968,44082266,44082545,44084049,44084324,44086082,44086338,44088733,44090892,44092603,44094471,	44078116,44082152,44082403,44082654,44084199,44084431,44086258,44086466,44088876,44091063,44092817,44094640,
[ENSDART00000048225 CNGA1 (2 of 2) chr1:44277044-44279254 (-), ENSDART00000134649 CNGA1 (2 of 2) chr1:44276757-44281942 (-)]	ENSDART00000048225	CNGA1 (2 of 2)	chr1	-	44276022	44279254	44277044	44279254	3	44276022,44278957,44279225,	44278552,44279064,44279254,
[ENSDART00000135477 si:dkey-22i16.3 chr1:44284582-44287772 (-), ENSDART00000132089 si:dkey-22i16.3 chr1:44284485-44287783 (-)]	ENSDART00000135477	si:dkey-22i16.3	chr1	-	44284487	44287772	44284872	44287628	9	44284487,44285381,44286104,44286631,44286758,44286882,44287454,44287574,44287728,	44285289,44285444,44286140,44286670,44286791,44286957,44287478,44287634,44287772,
[ENSDART00000113673 scpp5 chr1:44292452-44298087 (-)]	ENSDART00000113673	scpp5	chr1	-	44292452	44298087	44292879	44297943	12	44292452,44292873,44293122,44293334,44293468,44293644,44294133,44294365,44295674,44296065,44297889,44298035,	44292754,44292897,44293227,44293385,44293507,44293674,44294202,44294419,44295749,44296113,44297962,44298087,
[ENSDART00000109283 scpp7 chr1:44300515-44302891 (-)]	ENSDART00000109283	scpp7	chr1	-	44300517	44302891	44300837	44302734	9	44300517,44300830,44301564,44301763,44301946,44302098,44302515,44302680,44302841,	44300722,44300879,44301666,44301832,44301982,44302146,44302563,44302749,44302891,
[ENSDART00000121605 scpp6 chr1:44308672-44315791 (-), ENSDART00000108933 scpp6 chr1:44308673-44315791 (-)]	ENSDART00000108933	scpp6	chr1	-	44307908	44315791	44308789	44315649	8	44307908,44310523,44310661,44310784,44312002,44313646,44315595,44315768,	44309299,44310562,44310706,44310934,44312047,44313841,44315660,44315791,
[ENSDART00000132038 si:dkey-22i16.7 chr1:44328148-44331346 (-)]	ENSDART00000132038	si:dkey-22i16.7	chr1	-	44328143	44331346	44328333	44331191	4	44328143,44330977,44331137,44331297,	44328579,44331028,44331216,44331346,
[ENSDART00000137646 odam chr1:44340717-44345961 (-), ENSDART00000114345 odam chr1:44340717-44345899 (-)]	ENSDART00000137646	odam	chr1	-	44340711	44345961	44340914	44345883	9	44340711,44340895,44341044,44342371,44343144,44343628,44345302,44345692,44345877,	44340811,44340947,44341125,44342533,44343333,44343682,44345347,44345761,44345961,
[ENSDART00000129813 scpp9 chr1:44352319-44355588 (-), ENSDART00000148719 scpp9 chr1:44352316-44355479 (-)]	ENSDART00000129813	scpp9	chr1	-	44352319	44355588	44352641	44355469	9	44352319,44352772,44353269,44353417,44353576,44353784,44355310,44355421,44355566,	44352689,44352823,44353338,44353486,44353690,44353922,44355325,44355477,44355588,
[ENSDART00000148883 si:dkey-22i16.9 chr1:44356399-44365925 (-)]	ENSDART00000148883	si:dkey-22i16.9	chr1	-	44356380	44365925	44358867	44364322	6	44356380,44359348,44361542,44363590,44364258,44365711,	44359235,44359627,44361863,44363905,44364337,44365925,
[ENSDART00000108821 CR385050.1 chr1:44368915-44370139 (-)]	ENSDART00000108821	CR385050.1	chr1	-	44368798	44370139	44368894	44370139	4	44368798,44369232,44369698,44370108,	44369049,44369250,44370040,44370139,
[ENSDART00000138447 zgc:66472 chr1:44371234-44383531 (-), ENSDART00000134932 zgc:66472 chr1:44371234-44383460 (-), ENSDART00000109334 zgc:66472 chr1:44372013-44380995 (-)]	ENSDART00000138447	zgc:66472	chr1	-	44371233	44383531	44372013	44380995	8	44371233,44376100,44376224,44376392,44380144,44380701,44383259,44383384,	44372101,44376144,44376292,44377481,44380232,44381091,44383311,44383531,
[ENSDART00000124873 CU915778.2 chr1:44436223-44449278 (+)]	ENSDART00000124873	CU915778.2	chr1	+	44436223	44449278	44436223	44446773	4	44436223,44440699,44442575,44444647,	44436494,44440851,44442687,44449278,
[ENSDART00000125424 CU915778.1 chr1:44449882-44467566 (-)]	ENSDART00000125424	CU915778.1	chr1	-	44449882	44467566	44452645	44467566	16	44449882,44454927,44455182,44455915,44456268,44456938,44457678,44459894,44460154,44461539,44461982,44462727,44464467,44464895,44466315,44467383,	44453020,44455087,44455316,44456184,44456361,44457088,44457811,44460068,44460271,44461652,44462152,44462914,44464596,44464989,44466591,44467566,
[NM_001088999 ctnnd1 chr1:44628410-44654550 (-), ENSDART00000106048 ctnnd1 chr1:44621748-44654560 (-)]	ENSDART00000106048	ctnnd1	chr1	-	44621735	44654560	44623746	44654559	18	44621735,44627372,44628224,44628409,44630249,44632601,44634016,44634248,44635651,44637210,44640045,44641537,44643166,44645064,44647201,44647569,44649512,44654424,	44623755,44627455,44628278,44628600,44630445,44632752,44634144,44634314,44635805,44637328,44640238,44641760,44643422,44645340,44647485,44647695,44649584,44654560,
[NM_021398 Slc43a3 chr1:44693764-44705448 (+), ENSDART00000083213 slc43a3a chr1:44693716-44708951 (+)]	ENSDART00000083213	slc43a3a	chr1	+	44693716	44709460	44693716	44708951	13	44693716,44693980,44699244,44699380,44699539,44700010,44702811,44703068,44705090,44705272,44707476,44708810,44709235,	44693909,44694110,44699291,44699457,44699632,44700150,44702951,44703209,44705198,44705459,44707597,44709233,44709460,
[ENSDART00000073742 CABP2 (1 of 2) chr1:44709370-44723520 (-)]	ENSDART00000073742	CABP2 (1 of 2)	chr1	-	44709370	44723520	44710382	44723481	8	44709370,44710256,44711413,44713070,44713277,44714877,44721459,44723472,	44710105,44710408,44711561,44713180,44713412,44714908,44721678,44723520,
[ENSDART00000100321 timm10 chr1:44846026-44849977 (+)]	ENSDART00000100321	timm10	chr1	+	44846026	44849977	44846112	44849575	2	44846026,44849379,	44846183,44849977,
[ENSDART00000025145 UNC93B1 chr1:44852041-44875455 (+), NM_001100253 unc93b1 chr1:44853399-44873169 (+)]	ENSDART00000025145	UNC93B1	chr1	+	44852041	44875440	44852041	44873370	12	44852041,44853402,44855396,44855814,44858491,44858854,44860801,44862913,44866231,44866885,44869873,44873124,	44852161,44853544,44855550,44855976,44858621,44858948,44860926,44863096,44866505,44867004,44869996,44875440,
[ENSDART00000127380 crybb1l2 chr1:44897415-44902394 (+), ENSDART00000127087 crybb1l2 chr1:44895138-44902394 (+), ENSDART00000100309 crybb1l2 chr1:44895138-44902395 (+)]	ENSDART00000127380	crybb1l2	chr1	+	44897415	44902394	44897415	44901891	7	44897415,44897736,44897870,44898066,44898694,44899161,44901719,	44897423,44897746,44897989,44898156,44898753,44899297,44902394,
[ENSDART00000073736 rtn4rl2a chr1:44946554-44949026 (+), NM_178570 RTN4RL2 chr1:44947852-44948527 (+)]	ENSDART00000073736	rtn4rl2a	chr1	+	44946554	44951115	44946657	44948941	3	44946554,44947436,44947849,	44946715,44947663,44951115,
[ENSDART00000009858 tmx2b chr1:45024759-45037415 (-), ENSDART00000130873 tmx2b chr1:45024760-45037337 (-)]	ENSDART00000130873	tmx2b	chr1	-	45024760	45037337	45027204	45037337	9	45024760,45026567,45030856,45031076,45031654,45033551,45035215,45035897,45037148,	45025724,45027384,45030986,45031142,45031761,45033628,45035329,45035958,45037337,
[ENSDART00000003022 med19b chr1:45037940-45046664 (+), ENSDART00000137980 med19b chr1:45037846-45046967 (+)]	ENSDART00000137980	med19b	chr1	+	45037846	45046965	45037940	45046664	6	45037846,45040083,45040324,45042421,45042661,45046598,	45038148,45040206,45040458,45042575,45042756,45046965,
[NM_001198810 SLC43A1 chr1:45048925-45078102 (-), ENSDART00000081835 slc43a1b chr1:45046969-45093536 (-)]	ENSDART00000081835	slc43a1b	chr1	-	45046965	45093536	45048850	45078102	15	45046965,45050374,45050699,45059313,45059524,45061566,45065644,45065886,45068319,45068922,45075080,45075707,45077070,45077948,45093264,	45049021,45050498,45050773,45059443,45059657,45061602,45065791,45066020,45068453,45069015,45075157,45075763,45077257,45078106,45093536,
[ENSDART00000046562 si:dkey-28b4.8 chr1:45108953-45156791 (-), ENSDART00000133210 si:dkey-28b4.8 chr1:45107204-45159739 (-)]	ENSDART00000133210	si:dkey-28b4.8	chr1	-	45107205	45159739	45108953	45156791	23	45107205,45114272,45120162,45120405,45122455,45124516,45125348,45127651,45127877,45129905,45133460,45133684,45136620,45136949,45138839,45141087,45142812,45151542,45154588,45156123,45156527,45156673,45159165,	45109241,45114390,45120296,45120491,45122658,45124737,45125590,45127763,45128099,45130031,45133592,45133787,45136709,45137116,45138981,45141243,45142979,45151681,45154693,45156206,45156545,45156793,45159739,
[ENSDART00000112960 POLD4 chr1:45162533-45166458 (-), ENSDART00000139036 POLD4 chr1:45162531-45166415 (-)]	ENSDART00000112960	POLD4	chr1	-	45162533	45166458	45162654	45166458	5	45162533,45162782,45165007,45165238,45166262,	45162679,45162894,45165097,45165340,45166458,
[ENSDART00000049701 p2rx3b chr1:45201631-45213868 (+), ENSDART00000133926 p2rx3b chr1:45201631-45213866 (+)]	ENSDART00000049701	p2rx3b	chr1	+	45201631	45213834	45201802	45212346	13	45201631,45202533,45203738,45204738,45204900,45205073,45205255,45208223,45209703,45209880,45212042,45212217,45213159,	45201945,45202669,45203810,45204808,45204994,45205151,45205397,45208360,45209797,45209946,45212120,45213125,45213834,
[ENSDART00000144511 si:dkey-9i23.6 chr1:45240270-45252009 (-)]	ENSDART00000144511	si:dkey-9i23.6	chr1	-	45239442	45252009	45240570	45251983	6	45239442,45242794,45243574,45247384,45248893,45251962,	45240716,45242885,45244085,45247455,45250066,45252009,
[ENSDART00000073712 tmem187 chr1:45255775-45256657 (+)]	ENSDART00000073712	tmem187	chr1	+	45255775	45258200	45255869	45256640	1	45255775,	45258200,
[ENSDART00000059227 ndufs8a chr1:45269799-45278549 (+)]	ENSDART00000059227	ndufs8a	chr1	+	45269799	45278546	45271669	45277691	7	45269799,45271655,45271814,45274147,45274351,45274902,45277559,	45269869,45271712,45271880,45274237,45274524,45275031,45278546,
[ENSDART00000142820 si:dkey-9i23.11 chr1:45361994-45379732 (+), ENSDART00000140402 si:dkey-9i23.11 chr1:45374698-45381491 (+)]	ENSDART00000142820	si:dkey-9i23.11	chr1	+	45361994	45379696	45362151	45377584	10	45361994,45366882,45369316,45369708,45371981,45374608,45375134,45375535,45377195,45377473,	45362151,45366925,45369616,45369993,45372166,45374734,45375248,45375637,45377282,45379696,
[ENSDART00000134635 si:dkey-9i23.15 chr1:45380899-45384465 (-)]	ENSDART00000134635	si:dkey-9i23.15	chr1	-	45380905	45384465	45381333	45384127	3	45380905,45381799,45383929,	45381689,45381902,45384465,
[ENSDART00000147527 ASPG (2 of 2) chr1:45385934-45388572 (-)]	ENSDART00000147527	ASPG (2 of 2)	chr1	-	45385929	45388572	45385945	45388562	6	45385929,45386201,45386463,45387885,45388147,45388436,	45386092,45386364,45386547,45388043,45388243,45388572,
[ENSDART00000141145 si:dkey-9i23.16 chr1:45396508-45401702 (+)]	ENSDART00000141145	si:dkey-9i23.16	chr1	+	45396508	45404973	45397146	45401479	6	45396508,45397116,45397653,45399174,45399315,45401371,	45396563,45397233,45397764,45399231,45399456,45404973,
[ENSDART00000067621 VPS37C chr1:45405386-45418016 (+)]	ENSDART00000067621	VPS37C	chr1	+	45405386	45418015	45406155	45415027	5	45405386,45406139,45410674,45412113,45414403,	45405772,45406248,45410846,45412196,45418015,
[ENSDART00000126296 TMEM132A chr1:45441382-45452806 (+)]	ENSDART00000126296	TMEM132A	chr1	+	45441382	45452980	45441382	45452806	11	45441382,45442694,45444093,45444989,45445558,45447697,45449522,45449745,45450357,45451732,45451996,	45441455,45442909,45444303,45445483,45445711,45447893,45449666,45449948,45450583,45451924,45452980,
[ENSDART00000021336 dnaja1l chr1:45458475-45469909 (+), NM_001079380 dnaja4.1 chr1:45458979-45464917 (+)]	ENSDART00000021336	dnaja1l	chr1	+	45458475	45471398	45458985	45468980	9	45458475,45458963,45460254,45462876,45464122,45464801,45466211,45467038,45468755,	45458567,45459117,45460429,45462981,45464350,45464916,45466327,45467139,45471398,
[ENSDART00000073694 SMU1 chr1:45471470-45497637 (-)]	ENSDART00000073694	SMU1	chr1	-	45471470	45497637	45472358	45497637	13	45471470,45475210,45477266,45477528,45483898,45486563,45491438,45493697,45494183,45494368,45494986,45496539,45497611,	45472457,45475363,45477434,45477655,45484026,45486680,45491558,45493826,45494261,45494479,45495139,45496750,45497637,
[ENSDART00000023336 RPS6 chr1:45499246-45505056 (-)]	ENSDART00000023336	RPS6	chr1	-	45499246	45505056	45499288	45505015	6	45499246,45499581,45500757,45502408,45504397,45505009,	45499384,45499739,45500904,45502619,45504529,45505056,
[ENSDART00000073689 btr01 chr1:45519442-45531891 (+)]	ENSDART00000073689	btr01	chr1	+	45519442	45533141	45519442	45531912	6	45519442,45521327,45526033,45528244,45529681,45531352,	45520093,45521423,45526267,45528392,45529708,45533141,
[ENSDART00000129819 C1H20orf27 (2 of 2) chr1:45540764-45550613 (+)]	ENSDART00000129819	C1H20orf27 (2 of 2)	chr1	+	45540764	45550613	45540764	45549207	5	45540764,45541752,45543141,45547020,45549136,	45540783,45541886,45543292,45547146,45550613,
[ENSDART00000101347 RGAG1 chr1:45576553-45591090 (+), ENSDART00000142702 RGAG1 chr1:45576870-45591356 (+)]	ENSDART00000142702	RGAG1	chr1	+	45576870	45592294	45579315	45591090	8	45576870,45579041,45579208,45581151,45589573,45589749,45590754,45590980,	45577115,45579094,45579748,45587456,45589632,45589895,45590820,45592294,
[ENSDART00000114006 CABZ01051901.1 chr1:45761520-45778821 (-)]	ENSDART00000114006	CABZ01051901.1	chr1	-	45761434	45778821	45761520	45778821	19	45761434,45763989,45764155,45765675,45765989,45766196,45766716,45768378,45770230,45770392,45770609,45771966,45772181,45772745,45773444,45774643,45775609,45775811,45778403,	45761543,45764059,45764294,45765856,45766117,45766294,45766889,45768501,45770321,45770529,45770874,45772091,45772623,45772877,45773557,45774812,45775728,45775976,45778821,
[ENSDART00000145486 si:ch211-243a20.3 chr1:45822582-45837115 (+)]	ENSDART00000145486	si:ch211-243a20.3	chr1	+	45822582	45837138	45826349	45836859	4	45822582,45826336,45829710,45836549,	45822733,45826470,45829840,45837138,
[ENSDART00000143664 grin2bb chr1:45843254-46024295 (-), ENSDART00000092613 grin2bb chr1:45847162-45998380 (-)]	ENSDART00000143664	grin2bb	chr1	-	45843531	46024295	45847162	46024171	15	45843531,45854116,45858374,45861128,45864072,45866617,45866835,45877546,45880664,45884643,45917298,45919960,45927073,45996642,46024144,	45849640,45854355,45858562,45861289,45864302,45866743,45866989,45877718,45880873,45884758,45917491,45920231,45927217,45997248,46024295,
[ENSDART00000128383 sept3 chr1:46087336-46102326 (-), ENSDART00000044057 sept3 chr1:46087334-46104648 (-)]	ENSDART00000128383	2012-09-03	chr1	-	46087336	46102326	46088495	46102326	9	46087336,46090421,46092678,46092875,46093048,46094816,46098356,46101876,46102088,	46088631,46090473,46092775,46092971,46093166,46094954,46098438,46102005,46102326,
[ENSDART00000042158 serhl chr1:46120977-46133467 (-)]	ENSDART00000042158	serhl	chr1	-	46120976	46133467	46121450	46133073	13	46120976,46121683,46123743,46124462,46125457,46125902,46126104,46127314,46128800,46132555,46132754,46133015,46133374,	46121594,46121765,46123820,46124497,46125537,46126012,46126179,46127334,46128842,46132669,46132898,46133104,46133467,
[ENSDART00000141144 trappc5 chr1:46134462-46139697 (+), ENSDART00000149565 trappc5 chr1:46134499-46139728 (+), ENSDART00000038574 trappc5 chr1:46134419-46140137 (+)]	ENSDART00000038574	trappc5	chr1	+	46134419	46140127	46134791	46139597	3	46134419,46134734,46139300,	46134472,46135061,46140127,
[ENSDART00000019646 mcoln1 chr1:46142583-46171266 (+), ENSDART00000146101 mcoln1 chr1:46142379-46171267 (+)]	ENSDART00000019646	mcoln1	chr1	+	46142583	46171266	46142583	46167597	16	46142583,46153182,46155651,46156442,46158372,46158548,46158871,46159069,46160348,46160590,46163324,46163539,46164641,46166924,46167560,46171134,	46142626,46153424,46155816,46156599,46158457,46158645,46158971,46159176,46160498,46160692,46163447,46163656,46164731,46167055,46171081,46171266,
[ENSDART00000084512 PKN1 (2 of 2) chr1:46226242-46306861 (+), ENSDART00000132555 PKN1 (2 of 2) chr1:46254578-46306860 (+)]	ENSDART00000132555	PKN1 (2 of 2)	chr1	+	46254578	46308653	46255035	46303677	22	46254578,46270173,46273463,46275926,46283449,46285561,46289060,46291676,46293520,46293801,46296498,46296893,46298952,46299132,46299286,46299468,46299946,46301434,46301619,46301844,46302070,46303473,	46255113,46270474,46273612,46276020,46283568,46285775,46289255,46291786,46293664,46293877,46296628,46296981,46299026,46299208,46299378,46299645,46300009,46301511,46301762,46301952,46302151,46308653,
[ENSDART00000148086 map2k7 chr1:46310619-46326871 (+), ENSDART00000048191 map2k7 chr1:46310640-46326871 (+)]	ENSDART00000048191	map2k7	chr1	+	46310640	46333057	46310640	46326871	12	46310640,46315358,46319332,46319550,46321001,46322343,46322538,46322733,46323949,46324582,46324795,46326730,	46310764,46315406,46319477,46319617,46321115,46322463,46322646,46322913,46324030,46324725,46324841,46333057,
[ENSDART00000033669 LIPT1 chr1:46393391-46394688 (+), NM_001093873 lipt1 chr1:46393650-46394409 (+)]	ENSDART00000033669	LIPT1	chr1	+	46393391	46394699	46393560	46394679	1	46393391,	46394699,
[ENSDART00000108528 arhgef7b chr1:46429124-46517387 (+), ENSDART00000042086 arhgef7b chr1:46464644-46517372 (+)]	ENSDART00000042086	arhgef7b	chr1	+	46464644	46517373	46480925	46516332	21	46464644,46464802,46476459,46478095,46480922,46487246,46498028,46498206,46498815,46501460,46502830,46503012,46503256,46506934,46507104,46508506,46511436,46511837,46515859,46516062,46516209,	46464710,46464883,46476544,46478229,46481124,46487335,46498123,46498302,46498938,46501599,46502890,46503159,46503343,46507013,46507238,46508728,46511530,46511927,46515959,46516117,46517373,
[ENSDART00000010894 sox1b chr1:46691463-46693213 (+)]	ENSDART00000010894	sox1b	chr1	+	46691463	46693213	46691674	46692697	1	46691463,	46693213,
[ENSDART00000042064 tubgcp3 chr1:46902579-46946309 (+), ENSDART00000143228 tubgcp3 chr1:46902400-46947377 (+)]	ENSDART00000143228	tubgcp3	chr1	+	46902400	46947367	46902579	46946309	22	46902400,46904893,46905893,46906077,46906572,46907812,46909290,46920411,46922060,46923656,46924954,46930370,46932852,46934760,46935897,46936121,46936860,46940450,46941316,46941528,46943651,46946147,	46902655,46905001,46905961,46906161,46906788,46907960,46909403,46920537,46922129,46923789,46925121,46930481,46932961,46934950,46936033,46936190,46936996,46940539,46941448,46941669,46943768,46947367,
[ENSDART00000053221 arl11 chr1:47149743-47151627 (+)]	ENSDART00000053221	arl11	chr1	+	47149743	47150548	47149833	47150364	1	47149743,	47150548,
[ENSDART00000134450 ebpl chr1:47157319-47161104 (-), ENSDART00000053220 ebpl chr1:47157319-47161104 (-)]	ENSDART00000134450	ebpl	chr1	-	47157319	47161104	47157626	47161104	4	47157319,47158425,47160743,47160885,	47157858,47158564,47160813,47161104,
[ENSDART00000074519 kpna3 chr1:47163802-47203746 (-)]	ENSDART00000074519	kpna3	chr1	-	47163802	47203746	47166188	47203697	17	47163802,47166392,47167672,47167918,47170378,47170655,47170870,47172191,47172847,47175423,47175596,47177799,47180469,47180630,47180749,47192194,47203628,	47166284,47166487,47167835,47167990,47170483,47170784,47171002,47172236,47173017,47175510,47175682,47177895,47180522,47180660,47180839,47192239,47203746,
[ENSDART00000074514 C1H13orf1 (2 of 2) chr1:47207753-47215460 (-)]	ENSDART00000074514	C1H13orf1 (2 of 2)	chr1	-	47206471	47215460	47208194	47215312	5	47206471,47209384,47212610,47213716,47215206,	47208292,47209487,47212777,47213833,47215460,
[ENSDART00000142406 DLEU7 chr1:47328172-47329987 (-)]	ENSDART00000142406	DLEU7	chr1	-	47327916	47329987	47328478	47329777	2	47327916,47329477,	47328685,47329987,
[ENSDART00000053102 PDXK (1 of 3) chr1:47385502-47421793 (-), ENSDART00000142560 PDXK (1 of 3) chr1:47385139-47421908 (-)]	ENSDART00000053102	PDXK (1 of 3)	chr1	-	47381623	47421793	47385502	47421793	12	47381623,47388514,47388688,47391277,47391866,47393063,47393285,47393461,47395487,47403164,47415900,47421676,	47385615,47388581,47388825,47391299,47391959,47393109,47393371,47393496,47395571,47403269,47415955,47421793,
[ENSDART00000125032 pknox1.2 chr1:47461099-47481249 (-), ENSDART00000053097 pknox1.2 chr1:47461133-47475112 (-), ENSDART00000130607 pknox1.2 chr1:47457342-47478241 (-)]	ENSDART00000130607	pknox1.2	chr1	-	47457342	47478241	47461133	47478241	10	47457342,47464058,47464303,47468221,47468467,47470864,47471474,47472723,47475071,47478190,	47461333,47464222,47464380,47468350,47468565,47470979,47471645,47472895,47475232,47478241,
[ENSDART00000129072 ATP5J (2 of 2) chr1:47482990-47486757 (-), NM_001093968 MGC86324 chr1:47483946-47484057 (-)]	ENSDART00000129072	ATP5J (2 of 2)	chr1	-	47482851	47486757	47482990	47486757	4	47482851,47483942,47484181,47485766,	47483022,47484067,47484245,47486757,
[ENSDART00000036783 cryzl1 chr1:47588574-47602321 (+)]	ENSDART00000036783	cryzl1	chr1	+	47588574	47601936	47588931	47601740	12	47588574,47589906,47590783,47590942,47591071,47592838,47595953,47596578,47598433,47598628,47601432,47601640,	47588994,47589984,47590856,47590987,47591140,47592972,47596065,47596677,47598546,47598734,47601478,47601936,
[ENSDART00000101143 si:ch211-287j19.6 chr1:47613227-47619221 (-)]	ENSDART00000101143	si:ch211-287j19.6	chr1	-	47614021	47619221	47614525	47619177	7	47614021,47614510,47617139,47617352,47617710,47618305,47619113,	47614162,47614546,47617264,47617631,47617998,47618581,47619221,
[ENSDART00000053153 zgc:64115 chr1:47652530-47659103 (-)]	ENSDART00000053153	zgc:64115	chr1	-	47652526	47659103	47653557	47659004	9	47652526,47654680,47654957,47655396,47655832,47656099,47656454,47657719,47658940,	47653560,47654748,47655005,47655438,47655958,47656384,47656742,47657992,47659103,
[ENSDART00000053152 cbr1 chr1:47662948-47670284 (+)]	ENSDART00000053152	cbr1	chr1	+	47662948	47670283	47663120	47667356	4	47662948,47663118,47665452,47666919,	47663002,47663406,47665560,47670283,
[ENSDART00000007262 cx44.1 chr1:47943138-47945957 (+), ENSDART00000126904 cx44.1 chr1:47943138-47944832 (+)]	ENSDART00000007262	cx44.1	chr1	+	47943138	47946992	47943656	47944832	2	47943138,47943641,	47943281,47946992,
[ENSDART00000015046 fstl1a chr1:47956829-47982467 (+), NM_001017950 FSTL1 chr1:47967613-47980577 (+)]	ENSDART00000015046	fstl1a	chr1	+	47956829	47982465	47956918	47981990	11	47956829,47957001,47967610,47970274,47970713,47971913,47972144,47977031,47980464,47980696,47981948,	47956921,47957058,47967712,47970404,47970746,47972044,47972266,47977144,47980575,47980797,47982465,
[ENSDART00000114746 lrrc58a chr1:47983210-47990068 (+)]	ENSDART00000114746	lrrc58a	chr1	+	47983210	47993064	47983399	47990068	4	47983210,47986966,47987178,47989874,	47983854,47987095,47987456,47993064,
[ENSDART00000027624 obfc1 chr1:47996994-48010591 (+)]	ENSDART00000027624	obfc1	chr1	+	47996994	48010500	47997160	48010369	9	47996994,48000709,48000891,48002006,48002308,48004042,48007843,48008242,48010211,	47997296,48000805,48000969,48002174,48002429,48004193,48007969,48008315,48010500,
[ENSDART00000109244 sh3pxd2aa chr1:48013415-48188418 (+), ENSDART00000084457 sh3pxd2aa chr1:48082807-48180364 (+)]	ENSDART00000109244	sh3pxd2aa	chr1	+	48013415	48188418	48013415	48180364	16	48013415,48043106,48082807,48088606,48095386,48118302,48139866,48145467,48160058,48164592,48173637,48176594,48177112,48177995,48178128,48178423,	48013487,48043187,48082883,48088683,48095478,48118328,48139914,48145596,48160172,48164676,48173755,48176974,48177127,48178045,48178248,48188418,
[ENSDART00000101079 neurla chr1:48199030-48268849 (-)]	ENSDART00000101079	neurla	chr1	-	48194226	48268849	48201082	48268712	6	48194226,48203826,48213138,48238305,48245106,48268678,	48201324,48203967,48213834,48238627,48245348,48268849,
[ENSDART00000111598 si:ch73-6k14.1 chr1:49728967-49732289 (-)]	ENSDART00000111598	si:ch73-6k14.1	chr1	-	49728562	49732289	49729151	49732122	4	49728562,49729862,49731784,49732055,	49729203,49729961,49731911,49732289,
[ENSDART00000137179 caly chr1:49773284-49801458 (+), ENSDART00000052272 caly chr1:49777659-49802847 (+)]	ENSDART00000052272	caly	chr1	+	49777659	49802847	49777659	49800231	4	49777659,49794577,49796032,49800060,	49777788,49794694,49796146,49802847,
[ENSDART00000008468 msxb chr1:49859333-49861712 (+), NM_204559 MSX2 chr1:49860739-49861016 (+)]	ENSDART00000008468	msxb	chr1	+	49859333	49861622	49859387	49861151	2	49859333,49860747,	49859757,49861622,
[ENSDART00000144349 si:dkeyp-80c12.8 chr1:49864093-49868304 (-)]	ENSDART00000144349	si:dkeyp-80c12.8	chr1	-	49864095	49868304	49864344	49868304	3	49864095,49864981,49868244,	49864448,49865131,49868304,
[ENSDART00000074317 si:dkeyp-80c12.7 chr1:49876947-49915948 (-), NM_001058389 Os03g0841800 chr1:49880664-49902948 (-)]	ENSDART00000074317	si:dkeyp-80c12.7	chr1	-	49871716	49915948	49876947	49915948	11	49871716,49877752,49880663,49882355,49883846,49884720,49886273,49888333,49900989,49902846,49915860,	49877015,49877848,49880850,49882451,49883944,49884827,49886404,49888444,49901073,49903040,49915948,
[ENSDART00000015007 taf5 chr1:49921679-49938546 (+)]	ENSDART00000015007	taf5	chr1	+	49921679	49938543	49921708	49938145	11	49921679,49924465,49926322,49926982,49929538,49929750,49930853,49932048,49934358,49936256,49937927,	49922147,49924691,49926638,49927146,49929674,49929871,49930983,49932213,49934536,49936434,49938543,
[ENSDART00000137357 zgc:175214 chr1:49987601-50004515 (-), ENSDART00000030435 zgc:175214 chr1:49987601-50003937 (-)]	ENSDART00000137357	zgc:175214	chr1	-	49987600	50004515	49990496	50003850	6	49987600,49991796,49994345,49996191,49998726,50003825,	49990620,49991879,49994387,49996234,49998877,50004515,
[ENSDART00000052998 ITPRIP (2 of 2) chr1:50016607-50018943 (+)]	ENSDART00000052998	ITPRIP (2 of 2)	chr1	+	50016607	50018957	50016607	50018943	2	50016607,50016983,	50016711,50018957,
[ENSDART00000143474 zp3c chr1:50020623-50027810 (-)]	ENSDART00000143474	zp3c	chr1	-	50020624	50027810	50020726	50027810	8	50020624,50020936,50021149,50021349,50022367,50024311,50024517,50027171,	50020863,50021013,50021238,50021476,50022542,50024418,50024630,50027810,
[ENSDART00000113315 si:ch211-281g13.5 chr1:50031494-50037014 (-)]	ENSDART00000113315	si:ch211-281g13.5	chr1	-	50030840	50037014	50031603	50036937	24	50030840,50031893,50032080,50032478,50032634,50032784,50033031,50033248,50033477,50033631,50033813,50033964,50034204,50034468,50034652,50035036,50035234,50035388,50035642,50035845,50036045,50036339,50036491,50036732,	50031818,50031993,50032264,50032537,50032701,50032951,50033172,50033398,50033546,50033727,50033882,50034125,50034382,50034574,50034712,50035155,50035302,50035516,50035773,50035937,50036267,50036416,50036606,50037014,
[ENSDART00000113072 zgc:163136 chr1:50039075-50051002 (-), ENSDART00000145960 zgc:163136 chr1:50039075-50051000 (-)]	ENSDART00000113072	zgc:163136	chr1	-	50039062	50051002	50039184	50050923	25	50039062,50039475,50039662,50039940,50041083,50041233,50041480,50041697,50041939,50042094,50042288,50042433,50042669,50042972,50043160,50043543,50043741,50043895,50044152,50044355,50044549,50044838,50047522,50049652,50050809,	50039399,50039575,50039846,50039999,50041150,50041400,50041621,50041847,50042008,50042190,50042357,50042597,50042856,50043078,50043220,50043662,50043809,50044023,50044283,50044447,50044771,50044915,50047637,50049746,50051002,
[ENSDART00000017965 slkb chr1:50115502-50154867 (-), ENSDART00000134399 slkb chr1:50112916-50154867 (-)]	ENSDART00000134399	slkb	chr1	-	50112917	50154867	50115502	50154867	19	50112917,50117767,50117964,50120194,50120885,50123309,50126448,50129324,50132012,50132692,50134051,50136455,50139758,50141715,50141990,50143580,50145630,50150553,50154717,	50115649,50117881,50118090,50120386,50121010,50123439,50126628,50129448,50132143,50132946,50134451,50136578,50139840,50141910,50142063,50143730,50145679,50150718,50154867,
[ENSDART00000132405 lef1 chr1:50321630-50410570 (+), ENSDART00000047876 lef1 chr1:50321630-50410566 (+)]	ENSDART00000132405	lef1	chr1	+	50321630	50410572	50322024	50393582	11	50321630,50323684,50327722,50376641,50384688,50384995,50387281,50388021,50392530,50393547,50409289,	50322231,50323751,50327850,50376774,50384782,50385109,50387444,50388129,50392579,50393589,50410572,
[ENSDART00000050603 hadh chr1:50416754-50426125 (-)]	ENSDART00000050603	hadh	chr1	-	50416753	50426125	50417044	50425922	8	50416753,50417245,50419725,50419873,50420066,50422213,50422644,50425805,	50417163,50417362,50419798,50419963,50420193,50422371,50422773,50426125,
[ENSDART00000048281 cyp2u1 chr1:50430484-50439123 (-)]	ENSDART00000048281	cyp2u1	chr1	-	50427883	50439123	50430498	50439031	5	50427883,50433155,50433940,50436633,50438592,	50430677,50433323,50434102,50437287,50439123,
[ENSDART00000084184 aimp1 chr1:50801020-50826737 (+)]	ENSDART00000084184	aimp1	chr1	+	50801020	50826736	50801168	50826646	7	50801020,50806211,50808911,50811019,50818138,50824674,50826479,	50801170,50806345,50809025,50811175,50818344,50824843,50826736,
[ENSDART00000114098 dkk2 chr1:50899798-50945330 (-)]	ENSDART00000114098	dkk2	chr1	-	50896380	50945330	50900095	50945002	4	50896380,50921740,50921968,50944804,	50900346,50921872,50922119,50945330,
[ENSDART00000123274 papss1 chr1:50993335-51040923 (-), ENSDART00000024984 papss1 chr1:50994668-51035047 (-)]	ENSDART00000123274	papss1	chr1	-	50993338	51040923	50995033	51040923	15	50993338,51003585,51009697,51010285,51023113,51027000,51028641,51028854,51030972,51031608,51033583,51034850,51038076,51038625,51040829,	50995172,51003815,51009966,51010421,51023319,51027112,51028755,51028973,51031111,51031844,51033698,51034916,51038516,51038658,51040923,
[ENSDART00000020412 pkd2 chr1:51045921-51064113 (+)]	ENSDART00000020412	pkd2	chr1	+	51045921	51068023	51046337	51063908	14	51045921,51048262,51049126,51050836,51051178,51052700,51053018,51053266,51055544,51055766,51058410,51061367,51061610,51063674,	51046740,51048376,51049260,51051087,51051403,51052929,51053189,51053448,51055665,51055987,51058528,51061531,51061758,51068023,
[ENSDART00000148285 ppm1k chr1:51101257-51118114 (-), ENSDART00000048814 ppm1k chr1:51101656-51115383 (-), ENSDART00000015591 ppm1k chr1:51100793-51115698 (-)]	ENSDART00000015591	ppm1k	chr1	-	51100793	51115698	51102924	51115698	6	51100793,51103740,51105288,51105838,51112258,51115258,	51103056,51103875,51105433,51106004,51112359,51115698,
[ENSDART00000141977 HERC3 chr1:51146498-51198621 (+), ENSDART00000112994 HERC3 chr1:51149530-51198265 (+)]	ENSDART00000141977	HERC3	chr1	+	51146498	51198592	51149530	51198265	25	51146498,51149431,51153937,51158824,51158988,51160655,51163626,51164133,51166918,51167355,51169286,51173971,51175565,51175867,51177843,51179610,51179733,51180478,51180727,51183153,51189954,51192472,51195443,51195720,51198056,	51146595,51149756,51154097,51158901,51159210,51160747,51163757,51164288,51166992,51167480,51169346,51174083,51175755,51176031,51177957,51179634,51179823,51180649,51180871,51183320,51190018,51192555,51195627,51195823,51198592,
[ENSDART00000006538 otx1a chr1:51430587-51439279 (+)]	ENSDART00000006538	otx1a	chr1	+	51430587	51439281	51433434	51438933	4	51430587,51433413,51433987,51438165,	51430832,51433531,51434139,51439281,
[ENSDART00000010449 ugp2a chr1:51506477-51524949 (+)]	ENSDART00000010449	ugp2a	chr1	+	51506477	51527872	51506708	51524887	10	51506477,51509470,51512127,51516919,51519669,51521923,51522376,51524259,51524584,51524779,	51506724,51509598,51512235,51517105,51519803,51522221,51522574,51524502,51524689,51527872,
[ENSDART00000035150 spast chr1:51530600-51548157 (-)]	ENSDART00000035150	spast	chr1	-	51530602	51548157	51531134	51548041	17	51530602,51533162,51533294,51533452,51533693,51534096,51534268,51536094,51538669,51538832,51539827,51540521,51540744,51543010,51544701,51545517,51547734,	51531260,51533203,51533365,51533532,51533736,51534176,51534360,51536170,51538741,51538907,51539921,51540661,51540911,51543091,51544785,51545601,51548157,
[ENSDART00000024743 dpy30 chr1:51548879-51551650 (+)]	ENSDART00000024743	dpy30	chr1	+	51548879	51551648	51548957	51551512	5	51548879,51549622,51549738,51550553,51551439,	51548967,51549663,51549786,51550702,51551648,
[ENSDART00000006381 psen2 chr1:51558296-51571727 (-)]	ENSDART00000006381	psen2	chr1	-	51558377	51571727	51558666	51568092	11	51558377,51561489,51562594,51563078,51563226,51565043,51565395,51566003,51567390,51567960,51571592,	51558822,51561605,51562714,51563129,51563325,51565264,51565463,51566145,51567611,51568101,51571727,
[ENSDART00000064007 srd5a2a chr1:51575992-51582450 (+)]	ENSDART00000064007	srd5a2a	chr1	+	51575992	51582430	51576152	51582214	5	51575992,51579131,51579915,51580682,51582147,	51576427,51579295,51580017,51580833,51582430,
[ENSDART00000123632 jag1a chr1:51615149-51667295 (-), ENSDART00000047851 jag1a chr1:51614689-51667364 (-), ENSDART00000137172 jag1a chr1:51614687-51667364 (-)]	ENSDART00000047851	jag1a	chr1	-	51614689	51667364	51617397	51667158	27	51614689,51619681,51620187,51620748,51620886,51622751,51623194,51623396,51624501,51624897,51628382,51629082,51629275,51631034,51634772,51635285,51637337,51640281,51644209,51644617,51647934,51649979,51650420,51651211,51653967,51665807,51667086,	51617924,51619835,51620319,51620853,51621006,51622861,51623308,51623482,51624529,51625014,51628496,51629196,51629389,51631205,51634923,51635459,51637384,51640395,51644323,51644731,51648054,51650110,51650481,51651469,51654025,51666116,51667364,
[ENSDART00000146612 esf1 chr1:51712687-51729669 (-), ENSDART00000033047 esf1 chr1:51712827-51729638 (-)]	ENSDART00000146612	esf1	chr1	-	51712688	51729669	51712827	51727940	14	51712688,51713493,51714166,51716905,51717421,51720133,51720703,51721001,51722458,51724919,51725108,51726652,51727480,51729591,	51713133,51713646,51714255,51717002,51717546,51720301,51720854,51721116,51722611,51725029,51725222,51726885,51727963,51729669,
[ENSDART00000138878 C1H20orf7 chr1:51731041-51739160 (+), ENSDART00000088092 C1H20orf7 chr1:51731041-51739159 (+)]	ENSDART00000138878	C1H20orf7	chr1	+	51731041	51739161	51731122	51739012	11	51731041,51731372,51734516,51734791,51735368,51735549,51736107,51737655,51737785,51738699,51738931,	51731287,51731413,51734580,51734839,51735472,51735589,51736305,51737716,51737869,51738782,51739161,
[NM_001191528 MAST1 chr1:51841976-51882987 (+), ENSDART00000063938 MAST1 (1 of 2) chr1:51821591-51884292 (+)]	ENSDART00000063938	MAST1 (1 of 2)	chr1	+	51821591	51888194	51821591	51884292	26	51821591,51841978,51842190,51849035,51854019,51856672,51857956,51859852,51863860,51867611,51869465,51869645,51869938,51871490,51874416,51874742,51877506,51877716,51878359,51879908,51880997,51881433,51881746,51882013,51882252,51882538,	51821611,51842067,51842266,51849108,51854177,51856748,51858166,51859954,51863993,51867679,51869542,51869854,51870077,51871623,51874582,51874844,51877629,51877826,51878520,51880159,51881246,51881663,51881869,51882147,51882440,51888194,
[ENSDART00000063936 ATG4D (1 of 2) chr1:51899921-51915529 (+), NM_001093948 atg4d chr1:51900050-51911940 (+)]	ENSDART00000063936	ATG4D (1 of 2)	chr1	+	51899921	51915387	51899921	51912489	10	51899921,51902034,51904066,51906346,51906852,51907130,51908828,51908995,51911835,51912309,	51900117,51902118,51904240,51906704,51906917,51907255,51908907,51909072,51911955,51915387,
[ENSDART00000074294 actr2 chr1:51916359-51936946 (+)]	ENSDART00000074294	actr2	chr1	+	51916359	51936944	51916399	51933393	9	51916359,51922134,51925788,51926365,51927841,51928559,51929989,51930635,51933222,	51916447,51922245,51926004,51926438,51927978,51928709,51930135,51930768,51936944,
[ENSDART00000074284 SPRED2 (2 of 2) chr1:51953409-51983483 (-)]	ENSDART00000074284	SPRED2 (2 of 2)	chr1	-	51953401	51983483	51958491	51983483	6	51953401,51959531,51967862,51968014,51969533,51983457,	51959181,51959681,51967927,51968183,51969717,51983483,
[ENSDART00000112177 etaa1 chr1:52046089-52054756 (+)]	ENSDART00000112177	etaa1	chr1	+	52046089	52054756	52046187	52054373	6	52046089,52047416,52048340,52048519,52051282,52054251,	52046305,52047551,52048414,52048629,52052670,52054756,
[ENSDART00000100869 ppp3r1b chr1:52066633-52100204 (-)]	ENSDART00000100869	ppp3r1b	chr1	-	52066633	52100204	52068653	52100019	6	52066633,52071486,52074241,52076181,52085952,52100016,	52068701,52071671,52074301,52076358,52085992,52100204,
[ENSDART00000130828 CNRIP1 (2 of 2) chr1:52102724-52115356 (-)]	ENSDART00000130828	CNRIP1 (2 of 2)	chr1	-	52102676	52115356	52103567	52115305	3	52102676,52113633,52115126,	52103732,52113778,52115356,
[ENSDART00000129052 FBXO48 chr1:52117856-52123828 (-)]	ENSDART00000129052	FBXO48	chr1	-	52117433	52123828	52117856	52123828	5	52117433,52121154,52122887,52123739,52123822,	52118018,52121379,52122902,52123805,52123828,
[ENSDART00000129213 APLF chr1:52126310-52147697 (+)]	ENSDART00000129213	APLF	chr1	+	52126310	52147702	52126310	52145006	6	52126310,52127638,52130669,52136736,52137428,52144812,	52126350,52127817,52130959,52136865,52137475,52147702,
[ENSDART00000113853 si:ch211-44l19.2 chr1:52166979-52178893 (-), NM_021381 Prokr1 chr1:52167336-52178556 (-)]	ENSDART00000113853	si:ch211-44l19.2	chr1	-	52167074	52178893	52167210	52178643	2	52167074,52178191,	52167916,52178893,
[ENSDART00000057601 snrpb2 chr1:52196039-52204177 (-)]	ENSDART00000057601	snrpb2	chr1	-	52196037	52204177	52196292	52203997	6	52196037,52197378,52197577,52197733,52203414,52203906,	52196452,52197467,52197619,52197868,52203587,52204177,
[ENSDART00000045894 rnaseh2a chr1:52206820-52214585 (-), NM_001038534 RNASEH2A chr1:52207308-52213055 (-)]	ENSDART00000045894	rnaseh2a	chr1	-	52206820	52214585	52206979	52213055	9	52206820,52207309,52209411,52210196,52210409,52212195,52212777,52212928,52214368,	52207139,52207433,52209499,52210334,52210497,52212322,52212849,52213057,52214585,
[ENSDART00000040397 prdx2 chr1:52215802-52223814 (+)]	ENSDART00000040397	prdx2	chr1	+	52215802	52223811	52217036	52223503	6	52215802,52217015,52217327,52220448,52221269,52223420,	52215894,52217139,52217481,52220571,52221400,52223811,
[ENSDART00000122628 junb chr1:52226931-52228460 (-)]	ENSDART00000122628	junb	chr1	-	52226931	52228460	52227279	52228257	1	52226931,	52228460,
[ENSDART00000041265 rad23a chr1:52605850-52623351 (-), ENSDART00000149939 rad23a chr1:52606198-52623351 (-)]	ENSDART00000149939	rad23a	chr1	-	52604666	52623351	52606344	52623176	9	52604666,52608099,52610733,52611865,52612016,52613781,52616187,52619057,52623110,	52606458,52608273,52610864,52611941,52612144,52613828,52616378,52619219,52623351,
[ENSDART00000018817 rnf11 chr1:52625138-52632239 (+)]	ENSDART00000018817	rnf11	chr1	+	52625138	52632240	52625465	52630213	3	52625138,52629755,52630041,	52625564,52629925,52632240,
[ENSDART00000083946 PLD6 chr1:52697934-52705876 (-), NM_001016875 pld6 chr1:52698596-52701380 (-)]	ENSDART00000083946	PLD6	chr1	-	52697938	52705876	52698485	52705400	4	52697938,52701190,52703638,52705382,	52698739,52701414,52703826,52705876,
[ENSDART00000010236 cnn1a chr1:52709820-52717915 (-)]	ENSDART00000010236	cnn1a	chr1	-	52706078	52717915	52709820	52717769	7	52706078,52710467,52712441,52715126,52715754,52715908,52717709,	52710033,52710614,52712558,52715264,52715821,52716030,52717915,
[ENSDART00000128834 CABZ01035189.1 chr1:52838164-52866695 (+), NM_168751 CG32188 chr1:52866267-52869856 (+), NM_001103783 CG34220 chr1:52840773-52864560 (+)]	NM_168751	CG32188	chr1	+	52866267	52877803	52866267	52869856	6	52866267,52869802,52872601,52874953,52876888,52877162,	52866318,52870813,52874830,52875015,52877052,52877803,
[ENSDART00000143225 si:ch211-217k17.9 chr1:52892867-52895323 (+)]	ENSDART00000143225	si:ch211-217k17.9	chr1	+	52892867	52895323	52892983	52894893	4	52892867,52893610,52894411,52894756,	52893442,52893672,52894569,52895323,
[ENSDART00000111256 zgc:194101 chr1:52924721-52925862 (-)]	ENSDART00000111256	zgc:194101	chr1	-	52924475	52925862	52924809	52925839	2	52924475,52925812,	52925178,52925862,
[ENSDART00000083836 CCDC86 chr1:52946672-52955985 (-)]	ENSDART00000083836	CCDC86	chr1	-	52946674	52955985	52946892	52955845	4	52946674,52949736,52950541,52955336,	52947030,52949811,52950671,52955985,
[ENSDART00000124682 glb1 chr1:52956731-52973408 (+), ENSDART00000136942 glb1 chr1:52956795-52973409 (+), ENSDART00000033761 glb1 chr1:52956795-52973408 (+)]	ENSDART00000136942	glb1	chr1	+	52956795	52973408	52956806	52973120	16	52956795,52959692,52959966,52961235,52961390,52962271,52962966,52964371,52964574,52964705,52966266,52966427,52968586,52968930,52970483,52972871,	52956863,52959862,52960117,52961296,52961485,52962452,52963025,52964493,52964615,52964818,52966341,52966517,52968700,52969063,52970728,52973408,
[ENSDART00000074231 CLDND1 (2 of 2) chr1:52975994-52981658 (+)]	ENSDART00000074231	CLDND1 (2 of 2)	chr1	+	52975994	52984812	52977505	52980854	5	52975994,52977304,52978011,52979781,52980633,	52976024,52977800,52978119,52979919,52984812,
[ENSDART00000051558 abca1a chr1:53057960-53120449 (+), ENSDART00000142465 abca1a chr1:53057960-53123070 (+)]	ENSDART00000142465	abca1a	chr1	+	53057960	53123069	53057960	53120449	49	53057960,53060012,53063128,53063872,53069520,53072269,53080176,53086612,53087318,53088780,53089640,53093095,53093698,53094153,53094921,53096017,53096313,53097423,53097929,53098477,53099415,53100471,53101471,53102394,53103863,53104008,53104303,53105197,53105417,53106281,53106557,53106743,53107610,53107846,53108314,53108756,53109015,53109558,53110454,53110995,53111325,53112216,53112440,53112752,531…	53058026,53060106,53063270,53063991,53069642,53072461,53080266,53086856,53087458,53088897,53089835,53093301,53093875,53094376,53095143,53096222,53096427,53097595,53098061,53098617,53099553,53100704,53101544,53102597,53103912,53104122,53104452,53105322,53105516,53106471,53106652,53106776,53107716,53107921,53108484,53108934,53109131,53109703,53110581,53111122,53111446,53112279,53112547,53112894,531…
[ENSDART00000029252 aptx chr1:53148485-53154211 (-)]	ENSDART00000029252	aptx	chr1	-	53148287	53154211	53148589	53154184	8	53148287,53150013,53150681,53151262,53152287,53153595,53153931,53154054,	53148744,53150117,53150908,53151322,53152485,53153649,53153978,53154211,
[ENSDART00000141530 OSBP chr1:53156865-53193726 (+), ENSDART00000031301 OSBP chr1:53158017-53193726 (+)]	ENSDART00000031301	OSBP	chr1	+	53158017	53198358	53158017	53193726	15	53158017,53167277,53168041,53169397,53171050,53173684,53173965,53174571,53175764,53177471,53177803,53179729,53179977,53182807,53193583,	53158151,53167486,53168198,53169509,53171249,53173799,53174029,53174739,53176010,53177592,53177907,53179825,53180165,53183034,53198358,
[ENSDART00000126992 CABZ01021532.1 chr1:53239950-53240595 (+)]	ENSDART00000126992	CABZ01021532.1	chr1	+	53239950	53240827	53239950	53240595	1	53239950,	53240827,
[ENSDART00000127325 wu:fc75a09 chr1:53249322-53256921 (+)]	ENSDART00000127325	wu:fc75a09	chr1	+	53249322	53254062	53249322	53254028	2	53249322,53253341,	53249349,53254062,
[ENSDART00000123972 smarca5 chr1:53288129-53316645 (+), ENSDART00000024215 smarca5 chr1:53288210-53316592 (+)]	ENSDART00000024215	smarca5	chr1	+	53288210	53316592	53288333	53316225	24	53288210,53290220,53290462,53291368,53291771,53292526,53292786,53293027,53294285,53294625,53295359,53295692,53307532,53307826,53309235,53309926,53310134,53310341,53311755,53312078,53312324,53313634,53315818,53316159,	53288390,53290343,53290629,53291469,53291872,53292706,53292942,53293159,53294354,53294735,53295586,53295814,53307685,53307959,53309384,53310046,53310242,53310455,53311878,53312211,53312443,53313847,53315929,53316592,
[ENSDART00000108492 INPP4B chr1:53556807-53720579 (+), ENSDART00000147683 INPP4B chr1:53424875-53720812 (+)]	ENSDART00000108492	INPP4B	chr1	+	53556807	53723027	53556807	53720579	17	53556807,53561257,53577332,53595299,53613497,53628459,53651968,53661554,53663825,53681559,53684589,53688869,53691671,53694356,53697601,53704246,53720446,	53556885,53561324,53577480,53595430,53613602,53628568,53652140,53661806,53663964,53681750,53684713,53688996,53691812,53694454,53697714,53704401,53723027,
[ENSDART00000134222 il15 chr1:53730383-53755437 (-)]	ENSDART00000134222	il15	chr1	-	53730386	53755437	53730678	53755250	6	53730386,53732761,53734085,53734213,53744043,53755175,	53730810,53732890,53734130,53734319,53744138,53755437,
[NM_001191093 Rnf150 chr1:53775731-53792147 (+), ENSDART00000035713 rnf150 chr1:53775551-53794715 (+)]	ENSDART00000035713	rnf150	chr1	+	53775551	53794700	53775722	53794333	7	53775551,53786116,53787619,53788930,53792050,53792357,53794232,	53776167,53786367,53787691,53789013,53792147,53792565,53794700,
[ENSDART00000038807 ucp1 chr1:53870144-53884605 (+), NM_022803 UCP3 chr1:53873128-53880849 (+)]	ENSDART00000038807	ucp1	chr1	+	53870144	53884600	53873128	53883128	7	53870144,53873127,53874224,53875715,53877485,53880658,53883013,	53870247,53873254,53874432,53875913,53877587,53880839,53884600,
[ENSDART00000111938 elmod2 chr1:53887037-53945782 (-), ENSDART00000134285 elmod2 chr1:53890802-53903138 (-), ENSDART00000074215 elmod2 chr1:53887037-53903154 (-)]	ENSDART00000111938	elmod2	chr1	-	53887037	53945782	53891446	53945782	11	53887037,53888857,53889827,53895445,53895694,53897165,53897385,53899533,53899718,53902417,53945716,	53887912,53888906,53891604,53895579,53895763,53897299,53897515,53899631,53899747,53902565,53945782,
[ENSDART00000074218 zgc:66455 chr1:54009244-54022662 (-), ENSDART00000143349 zgc:66455 chr1:54009242-54022662 (-)]	ENSDART00000074218	zgc:66455	chr1	-	54009238	54022662	54009400	54022556	10	54009238,54012938,54015423,54015645,54016664,54016882,54017966,54020425,54022104,54022496,	54009786,54013088,54015584,54015704,54016753,54016942,54018452,54020845,54022135,54022662,
[ENSDART00000074221 b3gnt2a chr1:54029575-54031260 (-), NM_001102497 B3GNT2 chr1:54029821-54030574 (-)]	ENSDART00000074221	b3gnt2a	chr1	-	54025565	54031260	54029743	54030982	1	54025565,	54031260,
[ENSDART00000048349 commd1 chr1:54046453-54059982 (-), ENSDART00000100788 commd1 chr1:54045654-54059105 (-)]	ENSDART00000048349	commd1	chr1	-	54042924	54059982	54046453	54059982	5	54042924,54045226,54056314,54058909,54059971,	54042997,54046561,54056602,54059060,54059982,
[ENSDART00000112787 CABZ01073641.1 chr1:54106645-54121400 (+)]	ENSDART00000112787	CABZ01073641.1	chr1	+	54106645	54121400	54106645	54120787	18	54106645,54106829,54107117,54107807,54110979,54111209,54111558,54112508,54112798,54113105,54113502,54115291,54115615,54116177,54117497,54118440,54118640,54120721,	54106660,54107010,54107248,54108758,54111105,54111461,54111657,54112681,54112947,54113413,54113613,54115483,54115710,54116342,54117698,54118539,54118662,54121400,
[ENSDART00000108906 xpo1a chr1:54220652-54244553 (-)]	ENSDART00000108906	xpo1a	chr1	-	54219989	54244553	54220652	54244553	23	54219989,54220873,54221270,54221771,54223657,54224992,54225271,54225518,54227388,54229326,54230046,54231428,54233199,54234010,54235344,54237218,54237454,54237620,54237883,54238643,54240984,54244241,54244427,	54220829,54220932,54221318,54221981,54223826,54225187,54225378,54225702,54227687,54229483,54230228,54231567,54233397,54234169,54235473,54237338,54237503,54237802,54237928,54238705,54241057,54244343,54244553,
[ENSDART00000127216 FAM161A chr1:54247908-54255339 (-)]	ENSDART00000127216	FAM161A	chr1	-	54246082	54255339	54247908	54255339	5	54246082,54249238,54249528,54251743,54254254,	54248227,54249396,54249628,54251911,54255339,
[ENSDART00000026409 cct4 chr1:54262346-54275393 (-)]	ENSDART00000026409	cct4	chr1	-	54262346	54275393	54262466	54275239	13	54262346,54263700,54264850,54265728,54266223,54266440,54267465,54267713,54270191,54272783,54273964,54274180,54275130,	54262481,54263814,54265085,54265859,54266334,54266537,54267605,54267846,54270456,54272892,54274054,54274233,54275393,
[NM_001091946 pus10 chr1:54282723-54290576 (+), ENSDART00000114689 pus10 chr1:54275482-54291088 (+)]	ENSDART00000114689	pus10	chr1	+	54275482	54291086	54277556	54290950	18	54275482,54277555,54278743,54280302,54280477,54280814,54281002,54282713,54282878,54283031,54285226,54285462,54286970,54287169,54287982,54288187,54290476,54290911,	54275677,54277682,54278968,54280389,54280512,54280926,54281064,54282759,54282943,54283117,54285352,54285519,54287047,54287225,54288100,54288330,54290576,54291086,
[ENSDART00000122445 CU928197.1 chr1:54296203-54311074 (-)]	ENSDART00000122445	CU928197.1	chr1	-	54292651	54311074	54296203	54311074	14	54292651,54296446,54297318,54297694,54299372,54299646,54299900,54304017,54304789,54306827,54308560,54309263,54310641,54311028,	54296289,54296549,54297406,54297810,54299471,54299775,54300023,54304086,54304855,54306959,54308708,54309375,54310767,54311074,
[ENSDART00000125342 CABZ01086597.1 chr1:54357715-54361386 (+)]	ENSDART00000125342	CABZ01086597.1	chr1	+	54357715	54361661	54357715	54361386	5	54357715,54358351,54360985,54361185,54361316,	54357896,54359059,54361046,54361218,54361661,
[ENSDART00000114506 crfb17 chr1:54409098-54430062 (+)]	ENSDART00000114506	crfb17	chr1	+	54409098	54429571	54409272	54429542	7	54409098,54417214,54420440,54420782,54423142,54425376,54429212,	54409330,54417362,54420610,54420928,54423302,54425519,54429571,
[ENSDART00000010543 ltv1 chr1:54432430-54447381 (-)]	ENSDART00000010543	ltv1	chr1	-	54432505	54447381	54432994	54447250	11	54432505,54434920,54435686,54438045,54438740,54439808,54442166,54442686,54446051,54446442,54447247,	54433108,54435121,54435739,54438194,54438868,54440049,54442284,54442774,54446246,54446574,54447381,
[ENSDART00000007732 capn9 chr1:54448597-54473846 (-), NM_023709 Capn9 chr1:54451674-54473592 (-)]	ENSDART00000007732	capn9	chr1	-	54448716	54473846	54449104	54473752	20	54448716,54451433,54451691,54454260,54454432,54455934,54456102,54457706,54457924,54458809,54459763,54461910,54462185,54463190,54463357,54464768,54465014,54465226,54466331,54473545,	54449131,54451492,54451808,54454339,54454501,54455999,54456160,54457787,54457961,54459018,54459921,54462071,54462263,54463276,54463441,54464937,54465148,54465345,54466401,54473846,
[ENSDART00000032552 taf5l chr1:54478591-54485532 (-), ENSDART00000125063 taf5l chr1:54475846-54484479 (-)]	ENSDART00000125063	taf5l	chr1	-	54475839	54484479	54478685	54484479	6	54475839,54479703,54481637,54482124,54483658,54484340,	54479483,54480126,54481784,54482318,54483763,54484479,
[ENSDART00000139388 nup133 chr1:54497141-54508660 (+), ENSDART00000020680 nup133 chr1:54485863-54508659 (+)]	ENSDART00000139388	nup133	chr1	+	54497141	54508659	54497141	54508556	13	54497141,54498914,54499339,54501221,54501838,54503450,54504161,54504673,54506128,54506325,54507403,54507569,54508419,	54497246,54499139,54499459,54501321,54502090,54503584,54504320,54504809,54506247,54506406,54507477,54507658,54508659,
[ENSDART00000052838 acta1a chr1:54512687-54520286 (+)]	ENSDART00000052838	acta1a	chr1	+	54512687	54520283	54514767	54519936	7	54512687,54514756,54516154,54516641,54516972,54517444,54519792,	54512804,54514896,54516479,54516803,54517164,54517626,54520283,
[ENSDART00000037729 C1H1orf96 (2 of 2) chr1:54521737-54532906 (+)]	ENSDART00000037729	C1H1orf96 (2 of 2)	chr1	+	54521737	54532907	54521737	54529128	3	54521737,54524816,54528948,	54522095,54525115,54532907,
[ENSDART00000003097 RHOU (2 of 2) chr1:54545843-54554610 (-), NM_001163596 RHOV chr1:54549927-54554409 (-)]	NM_001163596	RHOV	chr1	-	54548484	54554409	54549927	54554409	2	54548484,54554316,	54549984,54554409,
[ENSDART00000109386 TRIOBP (1 of 2) chr1:54603904-54628677 (+), ENSDART00000149760 TRIOBP (1 of 2) chr1:54610316-54628714 (+)]	ENSDART00000149760	TRIOBP (1 of 2)	chr1	+	54610316	54628865	54610536	54628677	12	54610316,54610797,54611538,54611726,54614286,54615365,54617369,54617801,54620621,54621684,54627933,54628515,	54610542,54610854,54611607,54611816,54614396,54615810,54617586,54617898,54620781,54621798,54628020,54628865,
[ENSDART00000108601 DCAF15 chr1:54636219-54651493 (+)]	ENSDART00000108601	DCAF15	chr1	+	54636219	54651495	54636219	54651018	13	54636219,54637654,54639795,54642062,54643776,54644074,54646752,54648412,54648577,54648823,54650483,54650669,54650962,	54636315,54637752,54639934,54642169,54643922,54644233,54647322,54648504,54648700,54648906,54650588,54650785,54651495,
[ENSDART00000148382 rfx1b chr1:54655316-54674075 (-), ENSDART00000005646 rfx1b chr1:54655301-54674053 (-)]	ENSDART00000148382	rfx1b	chr1	-	54655301	54674075	54655966	54674075	17	54655301,54658911,54659025,54659309,54661635,54661873,54664120,54664346,54664536,54664737,54664934,54665306,54667266,54667686,54667884,54668037,54673752,	54656121,54658957,54659179,54659518,54661785,54661971,54664272,54664456,54664655,54664859,54665054,54665488,54667591,54667742,54667953,54668135,54674075,
[ENSDART00000062941 NTHL1 chr1:54692627-54704622 (+), NM_001105728 Nthl1 chr1:54694232-54701094 (+)]	ENSDART00000062941	NTHL1	chr1	+	54692627	54704623	54692627	54704525	7	54692627,54694095,54694420,54698649,54700789,54700982,54704423,	54692781,54694349,54694591,54698809,54700895,54701244,54704623,
[ENSDART00000080385 SLC9A3R2 (3 of 3) chr1:54706626-54728998 (+)]	ENSDART00000080385	SLC9A3R2 (3 of 3)	chr1	+	54706626	54730249	54706626	54728998	12	54706626,54706714,54709785,54709920,54717733,54718475,54720088,54721322,54724620,54727452,54728430,54728782,	54706710,54706837,54709890,54710010,54717765,54718489,54720099,54721505,54724779,54727471,54728462,54730249,
[ENSDART00000062945 TNPO2 (1 of 2) chr1:54733374-54746156 (-)]	ENSDART00000062945	TNPO2 (1 of 2)	chr1	-	54733605	54746156	54736766	54746156	14	54733605,54734645,54736730,54736967,54738518,54739157,54739329,54741226,54741405,54742096,54742421,54742763,54745420,54745911,	54733823,54735200,54736874,54737042,54738618,54739233,54739425,54741325,54741493,54742255,54742529,54742850,54745592,54746156,
[ENSDART00000122071 tsc2 chr1:54750008-54821473 (+), NM_000548 TSC2 chr1:54750065-54818990 (+)]	ENSDART00000122071	tsc2	chr1	+	54750008	54822491	54750008	54821473	46	54750008,54750633,54750867,54752936,54753294,54753520,54754352,54754555,54757906,54758131,54758583,54760265,54760540,54760852,54761232,54762440,54763323,54763968,54767601,54767852,54768725,54769124,54769378,54769630,54770853,54776415,54788948,54790279,54790673,54790938,54793000,54793063,54795485,54798358,54800952,54802726,54808089,54810077,54810942,54812273,54812509,54813209,54815277,54818304,548…	54750156,54750746,54750878,54752985,54753420,54753594,54754479,54754699,54758044,54758235,54758665,54760421,54760651,54760958,54761362,54762594,54763446,54764146,54767650,54767957,54768739,54769230,54769380,54769705,54770956,54776544,54788951,54790441,54790829,54791051,54793027,54793255,54795677,54798427,54801095,54803265,54808168,54810164,54811129,54812413,54812591,54813301,54815312,54818305,548…
[ENSDART00000039911 PKD1 chr1:54829727-54941279 (-)]	ENSDART00000039911	PKD1	chr1	-	54825149	54941279	54829697	54941279	58	54825149,54830415,54830673,54831523,54833961,54837294,54839085,54841122,54843768,54846023,54849416,54851263,54854057,54854526,54855996,54856175,54858229,54860311,54866898,54867107,54870543,54870932,54873954,54874337,54877730,54879726,54881369,54882368,54883047,54884552,54884773,54885256,54889261,54892251,54897663,54899952,54902003,54906902,54911654,54912050,54914197,54916721,54918580,54919383,549…	54829848,54830634,54830849,54831810,54834100,54837582,54839260,54841238,54843900,54846150,54849556,54851458,54854260,54854642,54856031,54856237,54858432,54860364,54867015,54867240,54870751,54871068,54873962,54874508,54877926,54879988,54881517,54882999,54883097,54884697,54884932,54885416,54889478,54892540,54897804,54900105,54905650,54907021,54911830,54912182,54914674,54917009,54918817,54919531,549…
[NM_001039654 ZNF550 chr1:55145919-55152648 (+), ENSDART00000125227 BX119918.1 chr1:55145763-55147299 (+)]	ENSDART00000125227	BX119918.1	chr1	+	55145763	55147422	55145763	55147389	1	55145763,	55147422,
[ENSDART00000049010 TEKT4 chr1:55153166-55161637 (-)]	ENSDART00000049010	TEKT4	chr1	-	55153170	55161637	55153971	55161571	6	55153170,55154484,55156412,55158116,55159443,55161022,	55154185,55154639,55156635,55158260,55159514,55161637,
[ENSDART00000108755 si:ch211-202h22.9 chr1:55166167-55176585 (+), ENSDART00000136063 si:ch211-202h22.9 chr1:55165900-55176788 (+)]	ENSDART00000136063	si:ch211-202h22.9	chr1	+	55165900	55176785	55166167	55176585	5	55165900,55166157,55169065,55173910,55176476,	55165953,55166267,55169137,55174052,55176785,
[ENSDART00000136764 si:ch211-202h22.8 chr1:55178202-55188176 (+), ENSDART00000109342 si:ch211-202h22.8 chr1:55178782-55187038 (+), ENSDART00000143997 si:ch211-202h22.8 chr1:55177535-55187060 (+)]	ENSDART00000136764	si:ch211-202h22.8	chr1	+	55178202	55188169	55178782	55187038	5	55178202,55178772,55179318,55182516,55186932,	55178288,55178876,55179384,55182664,55188169,
[ENSDART00000109919 si:ch211-202h22.7 chr1:55194832-55199216 (+), ENSDART00000141207 si:ch211-202h22.7 chr1:55189457-55199333 (+)]	ENSDART00000109919	si:ch211-202h22.7	chr1	+	55194832	55201647	55194832	55199216	6	55194832,55196698,55198009,55198570,55199110,55200236,	55194836,55196794,55198099,55198715,55200067,55201647,
[ENSDART00000114705 gprc5bb chr1:55216582-55222988 (+), ENSDART00000145018 gprc5bb chr1:55216582-55219513 (+)]	ENSDART00000114705	gprc5bb	chr1	+	55216582	55222988	55216582	55219420	3	55216582,55219045,55219375,	55217651,55219155,55222988,
[ENSDART00000083633 exosc1 chr1:55240066-55245449 (-)]	ENSDART00000083633	exosc1	chr1	-	55237584	55245449	55240080	55245436	8	55237584,55240570,55240735,55241176,55242795,55243825,55244002,55245408,	55240187,55240655,55240786,55241210,55242884,55243900,55244118,55245449,
[ENSDART00000016350 pgam1b chr1:55247077-55258229 (-), ENSDART00000122601 pgam1b chr1:55247076-55258273 (-)]	ENSDART00000016350	pgam1b	chr1	-	55247072	55258229	55248754	55258101	5	55247072,55248620,55251141,55254334,55257962,	55247912,55248924,55251322,55254609,55258229,
[ENSDART00000109089 cdc25d chr1:55260649-55274851 (-)]	ENSDART00000109089	cdc25d	chr1	-	55260585	55274851	55260905	55274743	12	55260585,55263702,55265525,55267663,55267967,55268875,55269852,55271250,55271419,55271595,55273445,55274642,	55261043,55263814,55265716,55267762,55268030,55268980,55269993,55271313,55271450,55271614,55273546,55274851,
[ENSDART00000130675 pi4k2a chr1:55276762-55294966 (+)]	ENSDART00000130675	pi4k2a	chr1	+	55276762	55294965	55276875	55292601	9	55276762,55286998,55287397,55288963,55289277,55289424,55289638,55289865,55292439,	55277214,55287199,55287529,55289117,55289339,55289524,55289772,55289925,55294965,
[ENSDART00000129831 zgc:136791 chr1:55313286-55324592 (+), ENSDART00000144759 zgc:136791 chr1:55306352-55324593 (+)]	ENSDART00000129831	zgc:136791	chr1	+	55313286	55324592	55313313	55323722	7	55313286,55315022,55316631,55319351,55320935,55323403,55323697,	55313615,55315196,55316808,55319525,55321109,55323577,55324592,
[ENSDART00000137352 zfyve27 chr1:55440437-55446547 (+), ENSDART00000083615 zfyve27 chr1:55429227-55447233 (+), ENSDART00000140375 zfyve27 chr1:55429142-55447233 (+), ENSDART00000126723 zfyve27 chr1:55432514-55447233 (+)]	ENSDART00000126723	zfyve27	chr1	+	55432514	55447233	55432514	55446056	12	55432514,55434386,55436531,55437554,55437850,55440164,55440392,55441768,55445467,55445691,55445820,55445988,	55432744,55434457,55436718,55437650,55437963,55440286,55440464,55441825,55445609,55445738,55445902,55447233,
[ENSDART00000089603 golga7ba chr1:55450913-55471323 (+), ENSDART00000145652 golga7ba chr1:55448304-55471070 (+)]	ENSDART00000089603	golga7ba	chr1	+	55450913	55471320	55450978	55468479	5	55450913,55463373,55466464,55466811,55468398,	55451038,55463499,55466617,55466913,55471320,
[ENSDART00000129710 crtac1a chr1:55473932-55487002 (-), ENSDART00000147212 crtac1a chr1:55474021-55477547 (-)]	ENSDART00000147212	crtac1a	chr1	-	55473937	55477547	55474277	55477547	4	55473937,55475628,55475754,55477542,	55474288,55475671,55475954,55477547,
[ENSDART00000122551 C1H10orf28 chr1:55489773-55498014 (+)]	ENSDART00000122551	C1H10orf28	chr1	+	55489773	55498014	55489773	55497200	7	55489773,55491949,55493354,55494600,55495751,55497147,55497293,	55490241,55492137,55493425,55494696,55495892,55497208,55498014,
[ENSDART00000074058 AL929150.1 chr1:55517969-55536713 (-)]	ENSDART00000074058	AL929150.1	chr1	-	55513603	55536713	55517969	55536713	12	55513603,55517677,55520369,55520956,55523540,55523716,55523853,55524681,55526316,55526931,55527589,55536527,	55515238,55518151,55520520,55521124,55523615,55523732,55524008,55524840,55526428,55527019,55527716,55536713,
[ENSDART00000037250 AL929150.2 chr1:55542026-55546724 (+), NM_001113017 RGS16 chr1:55544944-55545041 (+)]	ENSDART00000037250	AL929150.2	chr1	+	55542026	55546727	55542026	55546618	5	55542026,55542170,55544816,55544954,55546468,	55542070,55542227,55544869,55545118,55546727,
[ENSDART00000083572 C1H19orf53 chr1:55546681-55548292 (-)]	ENSDART00000083572	C1H19orf53	chr1	-	55547567	55548292	55547725	55548235	3	55547567,55547961,55548147,	55547878,55548017,55548292,
[ENSDART00000074034 vps54 chr1:55551106-55577651 (-)]	ENSDART00000074034	vps54	chr1	-	55548887	55577651	55551106	55577651	22	55548887,55552673,55553162,55553369,55554727,55555063,55555271,55555575,55556446,55557311,55557620,55560626,55561398,55564020,55564158,55570718,55571910,55572980,55574866,55575011,55576804,55577491,	55551212,55552768,55553270,55553450,55554849,55555148,55555377,55555639,55556562,55557493,55557744,55561009,55561495,55564073,55564271,55570840,55572296,55573112,55574901,55575093,55577046,55577651,
[ENSDART00000125878 PELI1 (2 of 2) chr1:55588234-55598025 (-)]	ENSDART00000125878	PELI1 (2 of 2)	chr1	-	55585522	55598025	55588234	55598025	6	55585522,55594479,55595519,55596851,55597744,55597963,	55588882,55594668,55595717,55596953,55597874,55598025,
[ENSDART00000077390 zgc:136758 chr1:55620124-55630034 (+)]	ENSDART00000077390	zgc:136758	chr1	+	55620124	55630038	55620221	55627157	5	55620124,55623732,55623951,55625091,55627013,	55620254,55623798,55624040,55625254,55630038,
[ENSDART00000074083 si:ch73-131e21.5 chr1:55663623-55670767 (-)]	ENSDART00000074083	si:ch73-131e21.5	chr1	-	55661385	55670767	55663700	55670564	6	55661385,55665872,55666106,55667198,55669155,55670550,	55663895,55666004,55666202,55667294,55669228,55670767,
[ENSDART00000138070 mb chr1:55677270-55683928 (+), ENSDART00000133472 mb chr1:55677285-55683740 (+), ENSDART00000136378 mb chr1:55677288-55684413 (+), ENSDART00000039807 mb chr1:55680353-55683536 (+)]	ENSDART00000136378	mb	chr1	+	55677288	55684408	55680353	55683536	4	55677288,55680350,55681061,55683395,	55677343,55680436,55681281,55684408,
[ENSDART00000035725 pane1 chr1:55700410-55705897 (-)]	ENSDART00000035725	pane1	chr1	-	55700411	55705897	55700650	55705797	6	55700411,55701767,55704500,55704738,55705568,55705740,	55700803,55701859,55704580,55704837,55705648,55705897,
[ENSDART00000100619 LUC7L2 chr1:55708457-55722416 (-), NM_001016024 luc7l2 chr1:55714104-55721908 (-)]	ENSDART00000100619	LUC7L2	chr1	-	55708457	55722416	55710393	55721905	10	55708457,55712265,55712501,55713991,55715872,55716651,55718048,55718722,55719518,55721844,	55710613,55712403,55712531,55714170,55716049,55716795,55718159,55718821,55719613,55722416,
[ENSDART00000140153 MRI1 chr1:55730477-55735431 (-), ENSDART00000111671 MRI1 chr1:55730478-55750050 (-)]	ENSDART00000111671	MRI1	chr1	-	55724096	55750050	55730951	55749944	6	55724096,55734524,55735254,55737084,55738332,55749812,	55731085,55734749,55735431,55737254,55738556,55750050,
[ENSDART00000110818 CC2D1A chr1:55755228-55778413 (-), NM_001126913 cc2d1a chr1:55762436-55773666 (-)]	ENSDART00000110818	CC2D1A	chr1	-	55751136	55778413	55755228	55778413	28	55751136,55755365,55757982,55759856,55760051,55760215,55762367,55762645,55763588,55763826,55765497,55766135,55766304,55767791,55767935,55768874,55769214,55769592,55769824,55769985,55772661,55772833,55773176,55773386,55774595,55776005,55776208,55778356,	55755267,55755413,55758059,55759977,55760124,55760271,55762559,55762736,55763688,55763878,55765556,55766209,55766421,55767850,55768058,55769047,55769326,55769708,55769897,55770113,55772751,55772906,55773286,55773687,55774829,55776112,55776356,55778413,
[ENSDART00000098615 nanos3 chr1:55787172-55788301 (-)]	ENSDART00000098615	nanos3	chr1	-	55787175	55788301	55787790	55788270	1	55787175,	55788301,
[ENSDART00000131015 BX284640.3 chr1:55789910-55801379 (-)]	ENSDART00000131015	BX284640.3	chr1	-	55789910	55801379	55789983	55801379	12	55789910,55790854,55791079,55794035,55794266,55796148,55797014,55797246,55798553,55798962,55799430,55801318,	55790035,55791002,55791197,55794197,55794370,55796299,55797132,55797325,55798677,55799031,55799528,55801379,
[ENSDART00000128979 zgc:172106 chr1:55833809-55838971 (+)]	ENSDART00000128979	zgc:172106	chr1	+	55833809	55839847	55833809	55838534	8	55833809,55836810,55837232,55837554,55838012,55838165,55838306,55838459,	55833852,55837149,55837478,55837818,55838091,55838238,55838378,55839847,
[ENSDART00000060693 CR788255.1 chr1:56183147-56185920 (+)]	ENSDART00000060693	CR788255.1	chr1	+	56183147	56186312	56183147	56185953	10	56183147,56183670,56183991,56184282,56184521,56184804,56185180,56185330,56185501,56185893,	56183174,56183695,56184173,56184447,56184725,56185037,56185250,56185422,56185664,56186312,
[ENSDART00000142244 dnajb1b chr1:56285680-56289973 (-), ENSDART00000060688 dnajb1b chr1:56285688-56289800 (-)]	ENSDART00000060688	dnajb1b	chr1	-	56285520	56289800	56286280	56289683	3	56285520,56288121,56289472,	56286514,56288690,56289800,
[ENSDART00000142069 NDUFB7 chr1:56319930-56325525 (-), ENSDART00000043933 NDUFB7 chr1:56320019-56325525 (-)]	ENSDART00000043933	NDUFB7	chr1	-	56320020	56325525	56320101	56325362	3	56320020,56323613,56325250,	56320183,56323782,56325525,
[NM_063304 cdc-48.2 chr1:56327237-56346830 (-), ENSDART00000100551 zgc:136908 chr1:56326838-56350533 (-)]	ENSDART00000100551	zgc:136908	chr1	-	56326840	56350533	56327045	56350344	19	56326840,56327232,56329207,56329454,56329789,56331192,56331419,56332840,56333116,56333353,56335570,56335787,56337713,56338966,56339177,56340998,56343379,56346740,56350321,	56327142,56327384,56329366,56329584,56329968,56331257,56331567,56332963,56333281,56333466,56335706,56335921,56337816,56339098,56339308,56341141,56343552,56346852,56350533,
[ENSDART00000109711 SAMD1 (1 of 2) chr1:56358088-56379852 (-), ENSDART00000137909 SAMD1 (1 of 2) chr1:56357455-56359920 (-)]	ENSDART00000109711	SAMD1 (1 of 2)	chr1	-	56356779	56379852	56358088	56379852	7	56356779,56359859,56361756,56364646,56366934,56372873,56378751,	56358238,56359977,56361847,56364707,56367017,56373150,56379852,
[ENSDART00000113302 si:ch73-343l4.2 chr1:56397189-56400341 (+), ENSDART00000142371 si:ch73-343l4.2 chr1:56397151-56400642 (+)]	ENSDART00000142371	si:ch73-343l4.2	chr1	+	56397151	56400641	56397151	56400341	5	56397151,56397565,56397982,56398158,56400202,	56397292,56397904,56398086,56398265,56400641,
[ENSDART00000144358 si:ch73-343l4.3 chr1:56408792-56413397 (+)]	ENSDART00000144358	si:ch73-343l4.3	chr1	+	56408792	56413674	56408792	56413448	3	56408792,56408948,56413267,	56408876,56409052,56413674,
[ENSDART00000064194 asf1bb chr1:56450299-56461094 (+), NM_024184 Asf1b chr1:56450681-56460394 (+)]	ENSDART00000064194	asf1bb	chr1	+	56450299	56461097	56450687	56460529	4	56450299,56453177,56453906,56460337,	56450796,56453293,56454083,56461097,
[ENSDART00000019936 prkacab chr1:56466028-56495655 (+)]	ENSDART00000019936	prkacab	chr1	+	56466028	56495652	56466452	56494469	10	56466028,56478130,56481018,56483841,56484027,56485805,56487176,56489687,56491593,56494343,	56466498,56478192,56481147,56483940,56484110,56485932,56487272,56489810,56491758,56495652,
[ENSDART00000024624 c3a chr1:56677111-56723732 (-), ENSDART00000052688 c3a chr1:56676992-56723747 (-)]	ENSDART00000052688	c3a	chr1	-	56676993	56723747	56677111	56723729	41	56676993,56677735,56679488,56681237,56681756,56683067,56685470,56687928,56690404,56690542,56690710,56692146,56693820,56694332,56694565,56696158,56696454,56696623,56698874,56701451,56702126,56704375,56704624,56704822,56706451,56706780,56709536,56709746,56709976,56713407,56713698,56713952,56714144,56714379,56716758,56716932,56717381,56719058,56720110,56720365,56723661,	56677253,56677871,56679572,56681318,56681843,56683173,56685560,56688019,56690453,56690633,56690770,56692305,56693984,56694489,56694661,56696318,56696530,56696827,56698958,56701512,56702339,56704515,56704713,56704925,56706649,56706861,56709666,56709899,56710168,56713611,56713845,56714068,56714262,56714482,56716846,56717015,56717470,56719132,56720279,56720561,56723747,
[ENSDART00000089358 crb3b chr1:56727186-56731247 (+)]	ENSDART00000089358	crb3b	chr1	+	56727186	56731700	56730602	56730893	2	56727186,56730519,	56727342,56731700,
[ENSDART00000019573 zgc:65894 chr1:56764158-56770684 (-)]	ENSDART00000019573	zgc:65894	chr1	-	56764163	56770684	56764314	56770551	4	56764163,56767383,56767586,56770494,	56765372,56767494,56767695,56770684,
[ENSDART00000127714 c3b chr1:56777739-56813502 (+), ENSDART00000019644 c3b chr1:56776458-56813305 (+)]	ENSDART00000127714	c3b	chr1	+	56777739	56813479	56777739	56813305	40	56777739,56778047,56782092,56782530,56783687,56785722,56786504,56787399,56787594,56789736,56790028,56790325,56790589,56790831,56792502,56792879,56793920,56794166,56794343,56795553,56795864,56796057,56796704,56797017,56797230,56797484,56797654,56801004,56802276,56803163,56803306,56804529,56806304,56806501,56807772,56808335,56808506,56810286,56810666,56813163,	56777932,56778213,56782166,56782619,56783770,56785834,56786607,56787520,56787710,56789892,56790232,56790517,56790742,56790961,56792574,56793077,56794026,56794255,56794486,56795760,56795925,56796141,56796908,56797093,56797390,56797580,56797811,56801168,56802435,56803223,56803397,56804575,56806395,56806591,56807878,56808425,56808587,56810370,56810802,56813479,
[NM_205405 C3 chr1:56824045-56851078 (+), ENSDART00000052683 c3c chr1:56821453-56867334 (+)]	ENSDART00000052683	c3c	chr1	+	56821453	56867225	56821453	56867157	41	56821453,56823666,56823970,56825852,56826260,56828341,56828520,56830591,56832867,56833062,56833829,56834121,56834418,56834682,56834914,56837769,56838130,56840675,56840927,56841124,56846694,56847006,56847240,56849972,56850285,56850494,56850782,56850976,56853254,56853960,56854651,56854794,56856085,56859362,56859558,56861472,56862567,56862738,56864703,56865083,56867015,	56821524,56823859,56824136,56825926,56826349,56828424,56828632,56830694,56832988,56833178,56833985,56834325,56834610,56834835,56835044,56837841,56838322,56840787,56841016,56841267,56846901,56847067,56847324,56850176,56850361,56850654,56850878,56851133,56853418,56854119,56854711,56854885,56856131,56859453,56859648,56861578,56862657,56862819,56864787,56865219,56867225,
[ENSDART00000021878 GCGR (1 of 2) chr1:56891751-56908189 (-), NM_001085752 gcgr chr1:56892006-56906975 (-)]	ENSDART00000021878	GCGR (1 of 2)	chr1	-	56889240	56908189	56891751	56908189	13	56889240,56894490,56894613,56897050,56899357,56903783,56904898,56905289,56905487,56905924,56906128,56906866,56908083,	56892096,56894532,56894758,56897139,56899427,56903844,56905058,56905301,56905641,56906024,56906242,56906974,56908189,
[NM_001127291 SLC25A10 chr1:56970888-56981216 (-), ENSDART00000037576 SLC25A10 chr1:56969372-56981222 (-)]	ENSDART00000037576	SLC25A10	chr1	-	56969372	56981222	56971216	56981222	8	56969372,56971843,56972281,56972428,56972563,56974355,56974886,56981132,	56971348,56971914,56972325,56972470,56972612,56974470,56975006,56981222,
[ENSDART00000126054 CABZ01059406.1 chr1:57074107-57083388 (-)]	ENSDART00000126054	CABZ01059406.1	chr1	-	57073938	57083388	57074083	57083388	10	57073938,57074252,57074858,57076032,57079462,57079763,57080014,57081294,57081528,57081592,	57074148,57074678,57074905,57076209,57079636,57079797,57080107,57081326,57081543,57083388,
[ENSDART00000130750 wu:fa03e10 chr1:57116381-57122151 (-)]	ENSDART00000130750	wu:fa03e10	chr1	-	57116387	57122151	57119033	57122151	5	57116387,57119573,57121539,57121699,57122135,	57119374,57119621,57121660,57121815,57122151,
[ENSDART00000130990 CABZ01059415.1 chr1:57172756-57190333 (-)]	ENSDART00000130990	CABZ01059415.1	chr1	-	57171913	57190333	57172756	57190333	11	57171913,57176048,57176955,57179060,57180479,57181280,57181673,57184743,57184848,57189253,57190311,	57172838,57176206,57177117,57179242,57180593,57181470,57181745,57184754,57186873,57189295,57190333,
[ENSDART00000109498 CABZ01049362.1 chr1:57301009-57318945 (+)]	ENSDART00000109498	CABZ01049362.1	chr1	+	57301009	57321611	57301009	57318945	5	57301009,57304151,57308080,57317419,57318181,	57301028,57304985,57308083,57318031,57321611,
[ENSDART00000018758 METRNL (2 of 2) chr1:57636522-57646803 (-)]	ENSDART00000018758	METRNL (2 of 2)	chr1	-	57634920	57646803	57636522	57646803	5	57634920,57638979,57640264,57641907,57646711,	57636857,57639006,57640306,57642281,57646803,
[NM_017957 EPN3 chr1:57678176-57686541 (-), ENSDART00000062841 EPN3 (2 of 2) chr1:57678408-57686541 (-)]	ENSDART00000062841	EPN3 (2 of 2)	chr1	-	57677821	57686541	57678177	57686541	13	57677821,57680073,57680416,57680476,57680648,57680997,57681150,57682113,57683560,57684983,57685194,57685561,57686313,	57678485,57680304,57680418,57680520,57680717,57681008,57681327,57682199,57683665,57684991,57685298,57685910,57686541,
[ENSDART00000034898 RASD2 (1 of 2) chr1:57737781-57741410 (+)]	ENSDART00000034898	RASD2 (1 of 2)	chr1	+	57737781	57741410	57737781	57739758	2	57737781,57739228,	57738415,57741410,
[ENSDART00000100509 BX908759.5 chr1:57825371-57829848 (-)]	ENSDART00000100509	BX908759.5	chr1	-	57821827	57829848	57825341	57829848	5	57821827,57825748,57828322,57828660,57829793,	57825622,57826006,57828562,57829011,57829848,
[NM_001032522 rhou chr1:57848937-57849153 (+), NM_138542 Rhov chr1:57846073-57849255 (+), ENSDART00000063774 RAC1 (6 of 6) chr1:57846075-57848224 (+)]	ENSDART00000063774	RAC1 (6 of 6)	chr1	+	57846075	57846676	57846076	57846640	1	57846075,	57846676,
[ENSDART00000017279 CABZ01058873.1 chr1:57994650-57997793 (-)]	ENSDART00000017279	CABZ01058873.1	chr1	-	57994650	57997793	57995758	57997788	9	57994650,57995874,57996085,57996278,57996468,57996620,57996945,57997289,57997715,	57995767,57995940,57996160,57996318,57996544,57996866,57997191,57997634,57997793,
[ENSDART00000080600 zgc:171470 chr1:58006903-58010244 (-)]	ENSDART00000080600	zgc:171470	chr1	-	58007436	58010244	58007454	58010105	6	58007436,58007776,58008107,58009622,58010050,58010219,	58007681,58008031,58008347,58009970,58010119,58010244,
[NM_001034270 TSPAN1 chr1:58036228-58039275 (+), ENSDART00000011560 zgc:153650 chr1:58029342-58041628 (+)]	ENSDART00000011560	zgc:153650	chr1	+	58029342	58041628	58033497	58041229	8	58029342,58033449,58036114,58038490,58039031,58039230,58040859,58041178,	58029387,58033527,58036330,58038565,58039139,58039362,58040952,58041628,
[ENSDART00000046961 CABZ01058863.1 chr1:58174834-58183630 (-)]	ENSDART00000046961	CABZ01058863.1	chr1	-	58174551	58183630	58174834	58183630	9	58174551,58175996,58176335,58177478,58177640,58177990,58181718,58182059,58183578,	58174892,58176229,58176384,58177563,58177883,58178245,58181961,58182413,58183630,
[ENSDART00000113371 CU302202.2 chr1:58374525-58385872 (-)]	ENSDART00000113371	CU302202.2	chr1	-	58374531	58385872	58378525	58385872	10	58374531,58379103,58380761,58381338,58381584,58382355,58382516,58383516,58384474,58385812,	58378793,58379310,58380889,58381471,58381691,58382432,58382636,58383721,58384609,58385872,
[ENSDART00000112472 BX927114.2 chr1:58441848-58448289 (+)]	ENSDART00000112472	BX927114.2	chr1	+	58441848	58449718	58441848	58449546	16	58441848,58442150,58442504,58442818,58442966,58443330,58443845,58444022,58444131,58444416,58447495,58448023,58448611,58448936,58449135,58449282,	58441894,58442477,58442522,58442835,58443221,58443676,58443998,58444039,58444198,58444462,58447509,58448347,58448644,58449044,58449170,58449718,
[ENSDART00000123618 BX927114.5 chr1:58493150-58515586 (+)]	ENSDART00000123618	BX927114.5	chr1	+	58493150	58516540	58493150	58515655	13	58493150,58494330,58498621,58500357,58502743,58505795,58508533,58512401,58514738,58514894,58515172,58515334,58515524,	58493175,58494665,58498627,58500366,58503051,58505804,58508578,58512420,58514817,58514990,58515219,58515461,58516540,
[ENSDART00000125082 BX469930.3 chr1:58626843-58627400 (+)]	ENSDART00000125082	BX469930.3	chr1	+	58626843	58627529	58626843	58627400	2	58626843,58627224,	58627147,58627529,
[ENSDART00000101645 BSPRY (9 of 9) chr1:58661394-58666430 (+)]	ENSDART00000101645	BSPRY (9 of 9)	chr1	+	58661394	58666430	58661394	58663188	4	58661394,58661515,58662518,58662652,	58661429,58661689,58662565,58666430,
[ENSDART00000140390 si:ch211-114l13.9 chr1:58683904-58686808 (-)]	ENSDART00000140390	si:ch211-114l13.9	chr1	-	58684340	58686808	58684487	58686788	2	58684340,58686511,	58684648,58686808,
[ENSDART00000081122 si:ch211-114l13.7 chr1:58701200-58722813 (-), NM_001131781 GLT25D2 chr1:58700006-58710335 (-)]	ENSDART00000081122	si:ch211-114l13.7	chr1	-	58697464	58722813	58701200	58722813	12	58697464,58701794,58703435,58704007,58704253,58704985,58705146,58706146,58707103,58708456,58710228,58722607,	58701468,58702001,58703563,58704140,58704360,58705062,58705266,58706351,58707238,58708574,58710339,58722813,
[ENSDART00000073777 TRIM35 (41 of 43) chr1:58725920-58735885 (+)]	ENSDART00000073777	TRIM35 (41 of 43)	chr1	+	58725920	58735889	58726015	58734107	6	58725920,58728578,58728844,58732377,58732506,58733436,	58726408,58728674,58729066,58732400,58732625,58735889,
[ENSDART00000073778 caspb chr1:58737282-58751091 (-), ENSDART00000136998 caspb chr1:58737274-58751108 (-)]	ENSDART00000073778	caspb	chr1	-	58737282	58751091	58737824	58745504	8	58737282,58739850,58740193,58740379,58740736,58744780,58745236,58751063,	58737935,58739960,58740292,58740611,58740913,58744998,58745513,58751091,
[ENSDART00000134949 si:ch211-15j1.6 chr1:58792707-58798199 (-), ENSDART00000141787 si:ch211-15j1.6 chr1:58792131-58801668 (-)]	ENSDART00000141787	si:ch211-15j1.6	chr1	-	58792117	58801668	58792707	58798196	9	58792117,58793207,58794296,58794488,58795121,58797124,58797928,58800832,58801621,	58792818,58793317,58794395,58794741,58795298,58797336,58798205,58800963,58801668,
[ENSDART00000073779 si:dkey-222h21.14 chr1:59019260-59033187 (+), ENSDART00000145234 si:dkey-222h21.14 chr1:59018369-59033241 (+)]	ENSDART00000073779	si:dkey-222h21.14	chr1	+	59019260	59033187	59019260	59031826	15	59019260,59021439,59021583,59022309,59024178,59024828,59025797,59026249,59029282,59029837,59030903,59031097,59031382,59031601,59032066,	59019346,59021475,59021772,59022440,59024268,59025018,59025958,59026414,59029431,59030025,59031010,59031213,59031490,59031988,59033187,
[ENSDART00000110808 CD97 (2 of 3) chr1:59215521-59225986 (+)]	ENSDART00000110808	CD97 (2 of 3)	chr1	+	59215521	59226659	59215521	59225986	17	59215521,59215727,59216060,59216662,59216968,59217208,59217560,59219072,59219360,59219561,59220277,59220541,59221296,59224028,59224258,59225760,59225941,	59215576,59215853,59216086,59216838,59217102,59217264,59217650,59219226,59219477,59219764,59220448,59220736,59221514,59224184,59224430,59225859,59226659,
[ENSDART00000114197 CU550716.4 chr1:59245731-59249008 (-)]	ENSDART00000114197	CU550716.4	chr1	-	59245731	59249008	59246522	59249008	2	59245731,59248989,	59247805,59249008,
[ENSDART00000111332 zgc:172091 chr1:59253032-59255082 (-)]	ENSDART00000111332	zgc:172091	chr1	-	59253038	59255082	59253365	59254061	2	59253038,59254898,	59254078,59255082,
[ENSDART00000073801 CU896655.4 chr1:59263865-59276086 (-)]	ENSDART00000073801	CU896655.4	chr1	-	59263387	59276086	59263865	59276086	13	59263387,59265523,59266275,59267114,59268843,59269116,59271947,59272283,59272437,59272685,59274037,59275025,59275925,	59263994,59265628,59266371,59267251,59268956,59269208,59272056,59272384,59272450,59272846,59274099,59275141,59276086,
[ENSDART00000112794 CU896655.2 chr1:59287549-59298201 (+)]	ENSDART00000112794	CU896655.2	chr1	+	59287549	59298729	59287549	59298234	14	59287549,59288333,59289482,59290430,59290826,59290892,59291177,59292647,59292901,59292952,59294632,59294844,59296680,59298072,	59287710,59288449,59289553,59290591,59290839,59290993,59291286,59292739,59292940,59293014,59294769,59294937,59296785,59298729,
[ENSDART00000122068 CU896655.6 chr1:59372954-59383273 (-)]	ENSDART00000122068	CU896655.6	chr1	-	59372520	59383273	59372954	59383273	6	59372520,59373062,59376034,59376520,59381223,59381513,	59373020,59373487,59376081,59376694,59381397,59383273,
[ENSDART00000113134 CU896655.3 chr1:59387146-59406069 (+)]	ENSDART00000113134	CU896655.3	chr1	+	59387146	59406069	59393883	59405517	8	59387146,59393874,59394389,59401133,59401435,59401753,59402094,59405406,	59387174,59394151,59394607,59401310,59401667,59401852,59402204,59406069,
[ENSDART00000109528 CD97 (3 of 3) chr1:59439204-59469619 (-)]	ENSDART00000109528	CD97 (3 of 3)	chr1	-	59439200	59469619	59441440	59469619	18	59439200,59442772,59444840,59445233,59447617,59448353,59449369,59449618,59452027,59452232,59452981,59455128,59455268,59456871,59459999,59460213,59460666,59469588,	59441485,59442865,59445012,59445392,59447835,59448548,59449540,59449818,59452144,59452386,59453071,59455184,59455400,59456985,59460128,59460354,59460735,59469619,
[ENSDART00000123441 CABZ01084613.2 chr1:59489942-59514625 (+), NM_001170404 Zfp157 chr1:59436708-59514073 (+)]	ENSDART00000123441	CABZ01084613.2	chr1	+	59489942	59514967	59489942	59514637	7	59489942,59498779,59499537,59500240,59507009,59509272,59513645,	59490719,59499321,59499836,59500260,59507416,59509283,59514967,
[ENSDART00000100152 sid4 chr1:59519115-59528888 (-)]	ENSDART00000100152	sid4	chr1	-	59519110	59528888	59519341	59528648	9	59519110,59519817,59522411,59523467,59523826,59525727,59526167,59526453,59528596,	59519346,59520084,59522480,59523578,59524010,59525906,59526302,59526600,59528888,
[ENSDART00000112921 CABZ01084613.1 chr1:59533895-59539069 (+)]	ENSDART00000112921	CABZ01084613.1	chr1	+	59533895	59541647	59533895	59539069	10	59533895,59534103,59534297,59534446,59534685,59536649,59536913,59537239,59538539,59539003,	59534023,59534220,59534405,59534473,59536527,59536823,59537087,59537286,59538961,59541647,
[ENSDART00000114576 CABZ01084615.1 chr1:59543536-59550894 (-)]	ENSDART00000114576	CABZ01084615.1	chr1	-	59543267	59550894	59543536	59550894	6	59543267,59544455,59544966,59546470,59548496,59550842,	59543709,59544783,59545231,59546678,59548643,59550894,
[ENSDART00000105993 CABZ01084616.1 chr1:59563309-59565679 (+)]	ENSDART00000105993	CABZ01084616.1	chr1	+	59563309	59565683	59563309	59564472	3	59563309,59563818,59563942,	59563470,59563865,59565683,
[ENSDART00000123327 CABZ01084618.1 chr1:59604335-59605730 (+), NM_001008701 LPHN1 chr1:59592845-59617083 (+)]	NM_001008701	LPHN1	chr1	+	59592845	59618591	59592845	59617083	14	59592845,59597045,59604326,59604935,59605415,59608656,59608770,59609978,59612352,59613556,59616270,59616450,59616648,59617044,	59593060,59597154,59604532,59605203,59605736,59608683,59608851,59610083,59612538,59613697,59616333,59616525,59616690,59618591,
[ENSDART00000113387 tmed1b chr1:59667309-59677015 (-), ENSDART00000098308 tmed1b chr1:59667321-59677129 (-)]	ENSDART00000098308	tmed1b	chr1	-	59667308	59677129	59670938	59677015	5	59667308,59670891,59671305,59673673,59676838,	59667532,59671157,59671492,59673771,59677129,
[ENSDART00000131567 MFAP4 (2 of 12) chr1:59728645-59729564 (-)]	ENSDART00000131567	MFAP4 (2 of 12)	chr1	-	59728356	59729564	59728636	59729564	4	59728356,59728973,59729238,59729417,	59728896,59729144,59729335,59729564,
[ENSDART00000013762 MFAP4 (3 of 12) chr1:59741974-59743179 (-)]	ENSDART00000013762	MFAP4 (3 of 12)	chr1	-	59741821	59743179	59742121	59743179	5	59741821,59742452,59742700,59742870,59743173,	59742378,59742620,59742797,59743083,59743179,
[ENSDART00000056494 MFAP4 (1 of 12) chr1:59755053-59756146 (-), NM_001141245 mfap4 chr1:59755155-59755773 (-)]	ENSDART00000056494	MFAP4 (1 of 12)	chr1	-	59754512	59756146	59755053	59756146	7	59754512,59754574,59755390,59755676,59755852,59755905,59756140,	59754573,59755310,59755558,59755773,59755903,59756052,59756146,
[ENSDART00000100195 MFAP4 (9 of 12) chr1:59825824-59826517 (+), NM_001141245 mfap4 chr1:59825824-59826415 (+)]	ENSDART00000100195	MFAP4 (9 of 12)	chr1	+	59825824	59827042	59825824	59826517	3	59825824,59826015,59826263,	59825921,59826183,59827042,
[ENSDART00000043516 MFAP4 (4 of 12) chr1:59830856-59832712 (-)]	ENSDART00000043516	MFAP4 (4 of 12)	chr1	-	59830775	59832712	59830964	59832588	5	59830775,59831869,59832117,59832291,59832576,	59831221,59832037,59832214,59832501,59832712,
[ENSDART00000100197 MFAP4 (10 of 12) chr1:59843330-59844660 (+)]	ENSDART00000100197	MFAP4 (10 of 12)	chr1	+	59843330	59844659	59843465	59844517	5	59843330,59843563,59843844,59844017,59844260,	59843471,59843764,59843941,59844185,59844659,
[ENSDART00000100199 mfap4 chr1:59845804-59847118 (+), NM_001141245 mfap4 chr1:59846093-59846883 (+)]	ENSDART00000100199	mfap4	chr1	+	59845804	59847115	59845935	59846988	5	59845804,59846033,59846313,59846494,59846731,	59845941,59846234,59846410,59846662,59847115,
[ENSDART00000100203 MFAP4 (8 of 12) chr1:59849610-59851138 (-), ENSDART00000149436 MFAP4 (8 of 12) chr1:59849609-59851252 (-)]	ENSDART00000100203	MFAP4 (8 of 12)	chr1	-	59848924	59851138	59849610	59851138	5	59848924,59849949,59850223,59850397,59851132,	59849867,59850117,59850320,59850607,59851138,
[ENSDART00000140490 MFAP4 (7 of 12) chr1:59856906-59859040 (-)]	ENSDART00000140490	MFAP4 (7 of 12)	chr1	-	59856825	59859040	59856900	59859040	4	59856825,59857234,59858728,59858896,	59857157,59857405,59858825,59859040,
[ENSDART00000149962 si:zfos-2330d3.6 chr1:59862723-59863393 (-)]	ENSDART00000149962	si:zfos-2330d3.6	chr1	-	59862722	59863393	59862886	59863393	2	59862722,59863224,	59863143,59863393,
[ENSDART00000137471 FP015850.4 chr1:59873768-59874245 (-)]	ENSDART00000137471	FP015850.4	chr1	-	59873602	59874245	59873768	59874245	2	59873602,59874097,	59874025,59874245,
[ENSDART00000132495 MFAP4 (12 of 12) chr1:59878442-59879675 (-)]	ENSDART00000132495	MFAP4 (12 of 12)	chr1	-	59878358	59879675	59878442	59879675	4	59878358,59878779,59879302,59879471,	59878699,59878947,59879399,59879675,
[ENSDART00000138870 MFAP4 (11 of 12) chr1:59886270-59887406 (-)]	ENSDART00000138870	MFAP4 (11 of 12)	chr1	-	59886115	59887406	59886270	59887406	5	59886115,59886680,59886928,59887095,59887400,	59886530,59886848,59887025,59887299,59887406,
[ENSDART00000130089 FP015850.2 chr1:59899716-59903474 (+)]	ENSDART00000130089	FP015850.2	chr1	+	59899716	59904440	59899716	59903474	8	59899716,59900030,59900160,59900324,59902354,59903072,59903319,59903398,	59899728,59900080,59900242,59900441,59902498,59903219,59903330,59904440,
[ENSDART00000128742 chr1:59918685-59926949 (-)]	ENSDART00000128742		chr1	-	59916539	59926949	59918685	59926949	17	59916539,59919068,59919259,59919473,59919638,59920009,59920211,59920933,59921233,59922079,59922549,59922806,59923861,59924106,59925793,59926567,59926787,	59918988,59919187,59919378,59919543,59919859,59920128,59920852,59921152,59922039,59922149,59922768,59922900,59924001,59924238,59925884,59926708,59926949,
[ENSDART00000111243 LPAR2 (1 of 2) chr1:59937887-59952964 (-), ENSDART00000062426 LPAR2 (1 of 2) chr1:59938139-59962020 (-)]	ENSDART00000111243	LPAR2 (1 of 2)	chr1	-	59937887	59952964	59938515	59952964	6	59937887,59938480,59943763,59947173,59950412,59952652,	59938088,59938611,59943796,59947427,59950827,59952964,
[NM_001108833 Sp6 chr1:59981019-59981403 (+), ENSDART00000126914 SP6 chr1:59980600-59981744 (+)]	ENSDART00000126914	SP6	chr1	+	59980600	59981744	59980698	59981535	1	59980600,	59981744,
[NM_133541 Gtf3c1 chr1:60041153-60058294 (+), ENSDART00000058692 CDC37 chr1:59998109-60060115 (+)]	ENSDART00000058692	CDC37	chr1	+	59998109	60060420	59998109	60060115	13	59998109,60000090,60001186,60001494,60006215,60010643,60019850,60043325,60045187,60058526,60058742,60059228,60059992,	59998217,60000363,60001292,60001610,60006218,60010655,60019855,60043386,60045198,60058557,60058925,60059297,60060420,
[ENSDART00000065640 ITGAL chr1:60006660-60019406 (-)]	ENSDART00000065640	ITGAL	chr1	-	60006673	60019406	60007019	60019406	31	60006673,60007313,60007644,60009878,60010082,60010270,60010380,60010601,60010798,60011005,60011379,60012968,60013196,60013407,60013762,60014010,60014384,60014711,60014999,60015464,60015687,60016227,60016384,60016807,60017211,60017448,60017744,60018115,60018285,60018615,60019360,	60007196,60007424,60007665,60009980,60010196,60010303,60010485,60010680,60010879,60011088,60011478,60013110,60013267,60013527,60013929,60014159,60014515,60014909,60015146,60015607,60015817,60016301,60016523,60016958,60017354,60017579,60017859,60018177,60018380,60018724,60019406,
[ENSDART00000054441 zgc:111991 chr1:60031623-60033162 (+)]	ENSDART00000054441	zgc:111991	chr1	+	60031623	60033809	60031623	60033162	5	60031623,60032047,60032263,60032604,60033459,	60031711,60032136,60032599,60033343,60033809,
[ENSDART00000067096 THUMPD1 chr1:60036455-60040027 (+)]	ENSDART00000067096	THUMPD1	chr1	+	60036455	60040240	60036455	60040027	5	60036455,60038564,60038802,60039103,60039599,	60036647,60038727,60039032,60039122,60040240,
[ENSDART00000063824 EARS2 chr1:60061324-60068255 (-)]	ENSDART00000063824	EARS2	chr1	-	60061291	60068255	60061324	60068255	19	60061291,60061592,60061794,60062722,60063027,60064774,60065358,60065497,60065616,60065748,60066035,60066129,60066616,60066661,60066823,60067355,60067589,60067745,60068170,	60061408,60061725,60061925,60062876,60063136,60065251,60065394,60065518,60065630,60065812,60066069,60066134,60066623,60066729,60066839,60067399,60067609,60067758,60068255,
[NM_001105095 cyp3a40 chr1:60208667-60215690 (+), ENSDART00000113943 cyp3a65 chr1:60208633-60218577 (+)]	ENSDART00000113943	cyp3a65	chr1	+	60208633	60218577	60208661	60218139	13	60208633,60208801,60209059,60209212,60209385,60209922,60213260,60213660,60213877,60214674,60214951,60215524,60218019,	60208720,60208895,60209112,60209312,60209499,60210011,60213409,60213803,60213962,60214835,60215178,60215687,60218577,
[ENSDART00000124264 GTF3C1 chr1:60221102-60228551 (-), NM_202770 AT4G01985 chr1:60127092-60226892 (-)]	ENSDART00000124264	GTF3C1	chr1	-	60220905	60228551	60221102	60228551	6	60220905,60223962,60226112,60226239,60228046,60228412,	60221351,60224149,60226146,60226891,60228321,60228551,
[ENSDART00000005116 rdh8l chr1:60269730-60279318 (+), NM_001047132 HSD17B1 chr1:60269827-60274134 (+)]	ENSDART00000005116	rdh8l	chr1	+	60269730	60279316	60269806	60278260	6	60269730,60273287,60273781,60274042,60277107,60278032,	60269912,60273449,60273961,60274136,60277291,60279316,
[ENSDART00000114770 TXNDC11 chr1:60280913-60289276 (-)]	ENSDART00000114770	TXNDC11	chr1	-	60279953	60289276	60280805	60289276	14	60279953,60281687,60282746,60284745,60285063,60285450,60285671,60285726,60286007,60286204,60286450,60286857,60287918,60289154,	60281370,60281762,60282859,60284904,60285399,60285507,60285713,60285924,60286120,60286267,60286581,60286955,60288135,60289276,
[NM_001030629 PARN chr1:60291001-60297281 (+), ENSDART00000030873 parn chr1:60290607-60304899 (+)]	ENSDART00000030873	parn	chr1	+	60290607	60300396	60290607	60299946	26	60290607,60290812,60291002,60291181,60294305,60294466,60294613,60294879,60295050,60295204,60295348,60295519,60295662,60295823,60295967,60296101,60296342,60296565,60296715,60296884,60297054,60297225,60297474,60299580,60299705,60299896,	60290626,60290890,60291082,60291249,60294387,60294527,60294776,60294942,60295089,60295247,60295429,60295576,60295740,60295867,60296010,60296177,60296453,60296635,60296771,60296971,60297129,60297403,60297578,60299638,60299824,60300396,
[ENSDART00000014000 OLFM2 (2 of 2) chr1:60305459-60313172 (+)]	ENSDART00000014000	OLFM2 (2 of 2)	chr1	+	60305459	60313172	60305622	60312402	7	60305459,60309139,60309357,60311022,60311369,60311589,60311809,	60305721,60309280,60309513,60311242,60311476,60311704,60313172,
[ENSDART00000062422 FP312971.1 chr1:60314808-60320004 (+)]	ENSDART00000062422	FP312971.1	chr1	+	60314808	60320005	60314808	60316398	3	60314808,60315757,60316218,	60314895,60315838,60320005,
[ENSDART00000126231 VASP (2 of 2) chr10:1938-19705 (+)]	ENSDART00000126231	VASP (2 of 2)	chr10	+	1938	19698	1938	18553	12	1938,10041,10783,11853,13706,14094,14210,14353,16091,16241,18308,18515,	1974,10222,10853,12166,13846,14140,14244,14396,16160,16311,18366,19698,
[NM_169705 Akt1 chr10:22963-29156 (+), ENSDART00000033858 akt2l chr10:22948-29534 (+)]	ENSDART00000033858	akt2l	chr10	+	22948	29732	22948	29534	15	22948,23065,23388,25043,25520,25913,26071,26304,26957,27047,27270,27758,28104,29057,29454,	22994,23194,23500,25188,25652,25979,26140,26318,26993,27117,27405,27973,28192,29160,29732,
[ENSDART00000108918 zgc:171929 chr10:48281-54537 (-), NM_001194573 OVOL1 chr10:48434-53694 (-)]	ENSDART00000108918	zgc:171929	chr10	-	48120	54537	48281	54537	3	48120,53537,54420,	48592,53727,54537,
[ENSDART00000035478 smad4 chr10:55301-59267 (+), ENSDART00000099979 smad4 chr10:55004-59267 (+)]	ENSDART00000035478	smad4	chr10	+	55301	62135	56011	59035	6	55301,55976,56568,57993,58823,61136,	55439,56160,56737,58132,60940,62135,
[NM_001015736 tiprl chr10:96812-101093 (+), ENSDART00000040240 tiprl chr10:95632-102228 (+)]	ENSDART00000040240	tiprl	chr10	+	95632	102228	96794	101465	9	95632,96774,97916,98601,100787,100994,101195,101339,101599,	95657,96907,98096,98701,100919,101090,101258,101507,102228,
[ENSDART00000022840 minal chr10:102537-107648 (+), NM_001134108 MINA chr10:103413-104423 (+)]	ENSDART00000022840	minal	chr10	+	102537	107651	102572	107268	9	102537,103368,103897,104092,104320,105256,105711,106372,107091,	102689,103737,104017,104221,104626,105425,105800,106483,107651,
[ENSDART00000108780 erg chr10:117106-122303 (+)]	ENSDART00000108780	erg	chr10	+	117106	123620	117106	122303	7	117106,118407,118515,118929,119105,120146,121779,	117314,118498,118577,118989,119162,120194,123620,
[ENSDART00000081982 KCNJ15 chr10:124452-126379 (-)]	ENSDART00000081982	KCNJ15	chr10	-	123816	126379	124365	126379	2	123816,126311,	125389,126379,
[ENSDART00000081978 KCNJ6 chr10:146700-158515 (+)]	ENSDART00000081978	KCNJ6	chr10	+	146700	161571	146700	158515	3	146700,147958,158207,	146733,148883,161571,
[ENSDART00000053702 ripply3 chr10:162943-166288 (+)]	ENSDART00000053702	ripply3	chr10	+	162943	167405	162943	166288	8	162943,163062,165965,166113,166347,166486,166593,167324,	162984,163120,166027,166347,166485,166567,167307,167405,
[ENSDART00000146125 TTC3 (1 of 2) chr10:189603-201891 (+)]	ENSDART00000146125	TTC3 (1 of 2)	chr10	+	189603	201896	189603	201485	27	189603,189772,190091,190918,191104,191448,191595,193292,193868,194213,194938,195443,195612,196031,196596,196912,197152,197582,197803,198164,198359,200006,200342,200562,200843,201124,201365,	189697,189899,190211,191020,191197,191513,191729,193607,194141,194260,194995,195529,195768,196443,196662,197062,197292,197651,197900,198268,198444,200108,200473,200692,200981,201217,201896,
[ENSDART00000036375 DSCR3 chr10:202082-206924 (-)]	ENSDART00000036375	DSCR3	chr10	-	202083	206924	202451	206890	8	202083,203951,205232,205489,205651,205951,206287,206833,	202534,204104,205383,205564,205732,206101,206431,206924,
[ENSDART00000059476 psmg1 chr10:272100-275808 (-)]	ENSDART00000059476	psmg1	chr10	-	272102	275808	272329	275729	7	272102,272774,273029,273440,273733,274715,275604,	272407,272896,273228,273503,273891,274804,275808,
[ENSDART00000059478 LRRC32 chr10:317529-322148 (+)]	ENSDART00000059478	LRRC32	chr10	+	317529	324054	317529	322148	2	317529,320255,	317616,324054,
[ENSDART00000101661 C10H11orf30 chr10:349407-363553 (-), NM_020193 C11orf30 chr10:349561-363554 (-)]	ENSDART00000101661	C10H11orf30	chr10	-	347874	363553	349483	363553	18	347874,350172,351829,352451,352680,352974,353234,353529,354225,356906,357221,357578,359075,359697,360158,361687,362874,363453,	349672,350514,352231,352570,352836,353139,353448,353706,354362,357077,357371,357800,359313,359963,360311,361863,362949,363553,
[ENSDART00000147449 si:ch211-242f23.8 chr10:400944-401795 (+), ENSDART00000129757 si:ch211-242f23.8 chr10:394388-401795 (+)]	ENSDART00000147449	si:ch211-242f23.8	chr10	+	400944	403664	400944	401795	1	400944,	403664,
[ENSDART00000124319 DACT3 (1 of 2) chr10:407803-422464 (+), ENSDART00000145124 DACT3 (1 of 2) chr10:407727-418770 (+)]	ENSDART00000124319	DACT3 (1 of 2)	chr10	+	407803	422467	407803	418770	5	407803,414066,415123,417586,420408,	408001,414190,415219,419571,422467,
[ENSDART00000113728 arvcfa chr10:468559-506192 (+), ENSDART00000145220 arvcfa chr10:468507-506952 (+)]	ENSDART00000113728	arvcfa	chr10	+	468559	508003	468559	506192	17	468559,476396,476815,479838,483882,484625,487633,491015,491584,497893,501672,501891,503402,504868,505035,506099,506446,	468571,476510,476923,480664,484066,484743,487799,491033,491656,498021,501823,502084,503514,504956,505112,506196,508003,
[ENSDART00000141713 si:ch211-242f23.3 chr10:508119-513888 (+)]	ENSDART00000141713	si:ch211-242f23.3	chr10	+	508119	513883	508119	513738	5	508119,508766,510583,511404,513738,	508245,509281,510620,512000,513883,
[ENSDART00000128275 npffr1l3 chr10:520127-534210 (+), NM_001098647 rfrpr chr10:528100-533753 (+)]	ENSDART00000128275	npffr1l3	chr10	+	520127	536167	527990	534053	4	520127,527975,529610,533158,	520237,528336,529710,536167,
[ENSDART00000067102 BMP10 (2 of 2) chr10:565879-569157 (+)]	ENSDART00000067102	BMP10 (2 of 2)	chr10	+	565879	569493	565879	569157	3	565879,566848,568223,	566072,566864,569493,
[ENSDART00000142833 glis3 chr10:631842-677490 (-), ENSDART00000085375 glis3 chr10:631845-677344 (-)]	ENSDART00000085375	glis3	chr10	-	631723	677344	631978	674564	12	631723,634528,637387,640616,644700,648558,649962,662683,663292,666324,674344,677289,	632103,634651,637455,640896,644833,648669,650124,663076,663881,666484,674648,677344,
[ENSDART00000043930 bmpr1bb chr10:992504-1006540 (-)]	ENSDART00000043930	bmpr1bb	chr10	-	991373	1006540	992504	1006540	6	991373,994147,1001068,1001527,1003931,1006399,	992630,994278,1001244,1001825,1004124,1006540,
[ENSDART00000150096 gdnf chr10:1438637-1455859 (+), ENSDART00000058463 gdnf chr10:1441116-1454861 (+)]	ENSDART00000058463	gdnf	chr10	+	1441116	1458193	1441116	1454861	2	1441116,1454340,	1441303,1458193,
[ENSDART00000006799 CABZ01066321.1 chr10:1511571-1525741 (-), NM_001195002 WDR70 chr10:1468018-1523557 (-)]	NM_001195002	WDR70	chr10	-	1467580	1523557	1468021	1523557	5	1467580,1511568,1517084,1521958,1523497,	1468081,1511652,1517238,1522092,1523557,
[ENSDART00000010626 nup155 chr10:1623968-1663150 (-), ENSDART00000137285 nup155 chr10:1623967-1651778 (-)]	ENSDART00000010626	nup155	chr10	-	1622362	1663150	1624063	1661925	34	1622362,1624280,1626069,1626654,1628838,1629033,1630619,1630984,1631218,1632417,1633960,1634347,1635789,1636296,1636515,1637544,1638208,1638376,1640477,1641892,1644154,1645939,1646384,1647114,1648497,1651536,1651704,1653173,1654266,1655669,1655814,1658027,1661783,1663047,	1624202,1624387,1626206,1626765,1628959,1629147,1630749,1631139,1631323,1632571,1634096,1634486,1635981,1636430,1636619,1637660,1638275,1638527,1640540,1641978,1644249,1646050,1646555,1647386,1648592,1651628,1651778,1653437,1654359,1655740,1655911,1658165,1661950,1663150,
[ENSDART00000142278 SGSM1 (1 of 2) chr10:1694803-1702060 (+), NM_001112951 sgsm1 chr10:1669595-1685033 (+), ENSDART00000060946 SGSM1 (1 of 2) chr10:1665487-1706385 (+)]	ENSDART00000060946	SGSM1 (1 of 2)	chr10	+	1665487	1706385	1665487	1702049	25	1665487,1665592,1669595,1674181,1674645,1676388,1676561,1678676,1678883,1679171,1682860,1683103,1684760,1684966,1687289,1688598,1689683,1692249,1693042,1697100,1697553,1698075,1698265,1700837,1701960,	1665494,1665636,1669671,1674344,1674798,1676456,1676704,1678808,1679005,1679239,1683024,1683230,1684887,1685031,1687435,1688727,1689854,1692321,1694995,1697225,1697636,1698185,1698362,1701005,1706385,
[ENSDART00000018532 triap1 chr10:1708215-1711580 (+)]	ENSDART00000018532	triap1	chr10	+	1708215	1711579	1708338	1710938	2	1708215,1710860,	1708485,1711579,
[ENSDART00000002985 srsf9 chr10:1713681-1723746 (-), ENSDART00000125188 srsf9 chr10:1713672-1723735 (-)]	ENSDART00000002985	srsf9	chr10	-	1713682	1723746	1714100	1721505	5	1713682,1715570,1721074,1721347,1723684,	1714322,1715743,1721259,1721709,1723746,
[ENSDART00000044432 apc chr10:1878296-1920569 (+), ENSDART00000149956 apc chr10:1878296-1921518 (+)]	ENSDART00000149956	apc	chr10	+	1878296	1921512	1878296	1920569	15	1878296,1895215,1897630,1899981,1900636,1902041,1905889,1907803,1908845,1910277,1911633,1911861,1912363,1912564,1914244,	1878431,1895300,1897805,1900090,1900750,1902125,1905976,1907902,1909224,1910373,1911773,1911939,1912480,1912779,1921512,
[ENSDART00000040271 C3AR1 chr10:1928071-1929034 (+), NM_001106216 Fpr1 chr10:1928206-1928974 (+)]	ENSDART00000040271	C3AR1	chr10	+	1928071	1931937	1928071	1929085	1	1928071,	1931937,
[ENSDART00000042441 oep chr10:1984307-1990349 (-), ENSDART00000122446 oep chr10:1983897-1990092 (-), ENSDART00000101023 oep chr10:1983897-1990083 (-)]	ENSDART00000122446	oep	chr10	-	1983897	1990092	1984760	1989999	6	1983897,1987764,1987960,1989575,1989817,1989979,	1984861,1987874,1988075,1989731,1989867,1990092,
[ENSDART00000097695 si:ch211-122m3.1 chr10:2220819-2420674 (+), ENSDART00000136363 si:ch211-122m3.1 chr10:2260689-2420198 (+)]	ENSDART00000097695	si:ch211-122m3.1	chr10	+	2220819	2420674	2220819	2420198	24	2220819,2260685,2281392,2288250,2297555,2310309,2312976,2315244,2318734,2320610,2348313,2352784,2355010,2362133,2365603,2367332,2381373,2389183,2394152,2398747,2403034,2411276,2413806,2420001,	2220904,2260796,2281586,2288398,2297759,2310485,2313114,2315506,2318878,2320776,2348420,2352904,2355208,2362290,2365731,2367503,2381592,2389423,2394377,2398881,2403122,2411495,2413878,2420674,
[ENSDART00000081926 CU856539.1 chr10:2526193-2553189 (-)]	ENSDART00000081926	CU856539.1	chr10	-	2526193	2553189	2530707	2553189	12	2526193,2532653,2534730,2534944,2537002,2537955,2541950,2542389,2543683,2547646,2549063,2553072,	2530917,2532808,2534828,2535057,2537074,2538069,2542169,2542504,2543811,2547709,2549162,2553189,
[ENSDART00000123467 CU856539.4 chr10:2555836-2577043 (+)]	ENSDART00000123467	CU856539.4	chr10	+	2555836	2577043	2555836	2576779	18	2555836,2557960,2558133,2558485,2560127,2560297,2562664,2562859,2563047,2565878,2566068,2568461,2568637,2568766,2570104,2574250,2574418,2576674,	2555898,2558033,2558176,2558564,2560216,2560444,2562716,2562960,2563133,2565960,2566154,2568549,2568686,2568857,2570205,2574335,2574523,2577043,
[ENSDART00000081922 CU856539.3 chr10:2595455-2607514 (+)]	ENSDART00000081922	CU856539.3	chr10	+	2595455	2607514	2595455	2602050	5	2595455,2595592,2598164,2598813,2601850,	2595507,2595641,2598418,2599047,2607514,
[ENSDART00000016103 NXNL2 chr10:2608903-2612287 (+)]	ENSDART00000016103	NXNL2	chr10	+	2608903	2612287	2608903	2611264	2	2608903,2611095,	2609373,2612287,
[ENSDART00000126937 wu:fb59d01 chr10:2614095-2622395 (+)]	ENSDART00000126937	wu:fb59d01	chr10	+	2614095	2622395	2614095	2622114	6	2614095,2616591,2618434,2621720,2621887,2622056,	2614165,2616786,2618602,2621786,2621966,2622395,
[ENSDART00000110202 CABZ01016604.1 chr10:2696068-2698291 (+)]	ENSDART00000110202	CABZ01016604.1	chr10	+	2696068	2700643	2696068	2698291	3	2696068,2697931,2698188,	2696123,2698049,2700643,
[ENSDART00000055882 PDXP chr10:2707270-2709390 (-)]	ENSDART00000055882	PDXP	chr10	-	2704295	2709390	2707313	2709359	2	2704295,2708761,	2707642,2709390,
[NM_001171990 C5orf35 chr10:2715456-2718513 (+), ENSDART00000112019 C10H5orf35 chr10:2711293-2721491 (+)]	ENSDART00000112019	C10H5orf35	chr10	+	2711293	2721512	2711293	2721491	6	2711293,2712112,2715457,2718398,2721216,2721403,	2711391,2712438,2715581,2718514,2721322,2721512,
[ENSDART00000030709 pnx chr10:2826476-2829049 (+)]	ENSDART00000030709	pnx	chr10	+	2826476	2830420	2826543	2828828	2	2826476,2828391,	2826655,2830420,
[ENSDART00000131435 AEBP1 (1 of 2) chr10:2834367-2865382 (+), ENSDART00000126440 AEBP1 (1 of 2) chr10:2834549-2865381 (+)]	ENSDART00000126440	AEBP1 (1 of 2)	chr10	+	2834549	2865381	2834549	2863741	20	2834549,2838456,2839244,2841083,2842005,2843384,2843542,2845635,2847807,2849732,2851475,2854125,2855738,2855960,2856311,2858759,2859240,2861841,2862089,2863256,	2834802,2838699,2839292,2841158,2842089,2843447,2843602,2845713,2847917,2849872,2851560,2854270,2855818,2856084,2856508,2858933,2859625,2861981,2862189,2865381,
[ENSDART00000055869 YKT6 chr10:2868459-2878128 (+), ENSDART00000131505 YKT6 chr10:2868396-2878128 (+)]	ENSDART00000055869	YKT6	chr10	+	2868459	2878128	2870150	2877349	8	2868459,2870132,2870349,2873457,2874031,2875934,2876129,2877313,	2868649,2870254,2870432,2873558,2874136,2876000,2876231,2878128,
[NM_001091153 ddx56 chr10:2887913-2901009 (-), ENSDART00000034555 ddx56 chr10:2883568-2902927 (-)]	ENSDART00000034555	ddx56	chr10	-	2883569	2902927	2883875	2902915	14	2883569,2886465,2887912,2888112,2888279,2888803,2889694,2889893,2891353,2893925,2896313,2896888,2900853,2902858,	2883959,2886560,2888018,2888202,2888353,2888898,2889808,2890031,2891595,2894016,2896484,2897043,2901015,2902927,
[ENSDART00000002622 oclna chr10:2951966-2970092 (-)]	ENSDART00000002622	oclna	chr10	-	2951967	2970092	2952620	2969778	9	2951967,2952800,2954648,2954989,2957670,2963303,2965104,2969722,2970044,	2952719,2952842,2954820,2955163,2957795,2963471,2965744,2969779,2970092,
[ENSDART00000006772 marveld2a chr10:2974239-2987857 (-), ENSDART00000132526 marveld2a chr10:2974242-2998599 (-)]	ENSDART00000132526	marveld2a	chr10	-	2974239	2998599	2974913	2987857	9	2974239,2978429,2982215,2983042,2985359,2986747,2994840,2996964,2998521,	2975039,2978480,2982387,2983185,2985395,2987907,2994966,2997019,2998599,
[ENSDART00000147918 ZFYVE16 chr10:3003165-3053712 (+), ENSDART00000111830 ZFYVE16 chr10:3008281-3053710 (+)]	ENSDART00000111830	ZFYVE16	chr10	+	3008281	3053714	3008281	3053510	17	3008281,3010488,3014199,3029146,3034151,3034376,3037938,3038157,3039946,3041155,3043223,3043410,3045663,3045843,3049228,3051781,3053351,	3008351,3012416,3014296,3029314,3034291,3034590,3038061,3038313,3040171,3041238,3043328,3043561,3045744,3046006,3049334,3051958,3053714,
[ENSDART00000081794 RASGRF2 (2 of 2) chr10:3076990-3126780 (+)]	ENSDART00000081794	RASGRF2 (2 of 2)	chr10	+	3076990	3127230	3076990	3126780	21	3076990,3092395,3095833,3098351,3098542,3100577,3102021,3103193,3103782,3106191,3107799,3107976,3111778,3112672,3115397,3118133,3119539,3119731,3123313,3125797,3126672,	3077269,3092502,3095981,3098441,3098796,3100657,3102215,3103303,3103901,3106352,3107866,3108113,3111861,3112921,3115801,3118259,3119629,3119838,3123426,3125858,3127230,
[ENSDART00000055140 C10H9orf167 (3 of 4) chr10:3136439-3145057 (+), NM_001139797 ci167 chr10:3143714-3144545 (+)]	ENSDART00000055140	C10H9orf167 (3 of 4)	chr10	+	3136439	3146091	3136526	3144608	2	3136439,3143378,	3136526,3146091,
[ENSDART00000114829 VDAC3 (3 of 3) chr10:3150739-3156860 (-)]	ENSDART00000114829	VDAC3 (3 of 3)	chr10	-	3150761	3156860	3151367	3156860	3	3150761,3154632,3156689,	3151459,3154690,3156860,
[ENSDART00000028870 ube2l3a chr10:3159003-3164911 (+)]	ENSDART00000028870	ube2l3a	chr10	+	3159003	3164906	3159003	3164265	4	3159003,3159872,3160598,3164110,	3159084,3159968,3160785,3164906,
[ENSDART00000101449 CKMT2 (1 of 2) chr10:3167715-3177763 (-)]	ENSDART00000101449	CKMT2 (1 of 2)	chr10	-	3167721	3177763	3167839	3177763	9	3167721,3169058,3169270,3169522,3169892,3172025,3172335,3174537,3177614,	3167956,3169184,3169405,3169646,3169978,3172247,3172431,3174736,3177763,
[ENSDART00000113162 pi4kaa chr10:3191217-3268574 (-)]	ENSDART00000113162	pi4kaa	chr10	-	3191217	3268574	3194790	3268574	55	3191217,3196550,3197605,3198503,3200253,3201462,3201667,3203381,3205042,3205196,3205387,3207418,3209305,3209549,3212144,3212401,3214168,3214450,3215082,3217660,3220321,3221053,3223697,3224709,3228281,3228511,3231207,3231437,3232745,3232937,3236003,3236219,3237417,3237577,3238111,3240038,3240796,3243200,3246902,3247084,3247363,3250035,3250262,3250964,3254794,3257300,3257473,3257623,3259428,3260288…	3194842,3196634,3197695,3198663,3200374,3201588,3201772,3203491,3205113,3205269,3205458,3207548,3209426,3209603,3212312,3212492,3214368,3214530,3215241,3217788,3220429,3221205,3223856,3224837,3228438,3228604,3231327,3231527,3232829,3233019,3236128,3236290,3237500,3237711,3238248,3240147,3240847,3243369,3247003,3247268,3247459,3250165,3250392,3251065,3254986,3257397,3257539,3257775,3259495,3260551…
[ENSDART00000109131 CR450714.1 chr10:3276145-3302671 (-), NM_005984 SLC25A1 chr10:3277211-3290322 (-)]	ENSDART00000109131	CR450714.1	chr10	-	3272570	3302671	3276145	3302669	10	3272570,3277229,3279293,3279448,3279649,3281435,3283580,3285860,3290210,3302428,	3276301,3277326,3279367,3279564,3279754,3281520,3283719,3285960,3290318,3302671,
[ENSDART00000031121 VDAC3 (2 of 3) chr10:3307330-3325707 (+)]	ENSDART00000031121	VDAC3 (2 of 3)	chr10	+	3307330	3325684	3310120	3325079	9	3307330,3310115,3310274,3315948,3319025,3319154,3319898,3322050,3324987,	3307483,3310187,3310324,3316101,3319078,3319376,3320049,3322108,3325684,
[ENSDART00000007577 C10H9orf167 (4 of 4) chr10:3331217-3339864 (-)]	ENSDART00000007577	C10H9orf167 (4 of 4)	chr10	-	3330166	3339864	3331666	3339777	2	3330166,3339777,	3332896,3339864,
[NM_001089891 brap chr10:3344500-3366593 (+), ENSDART00000109148 brap chr10:3344273-3366709 (+)]	ENSDART00000109148	brap	chr10	+	3344273	3367713	3344509	3366680	12	3344273,3348774,3350196,3352917,3355899,3356198,3361051,3361508,3363127,3363621,3363803,3366310,	3344588,3348936,3350350,3353107,3356013,3356347,3361127,3361647,3363237,3363711,3363907,3367713,
[ENSDART00000111241 NAA25 chr10:3372151-3401792 (-)]	ENSDART00000111241	NAA25	chr10	-	3372152	3401792	3373604	3401758	24	3372152,3375305,3375557,3375743,3376841,3377640,3377983,3378781,3379362,3379596,3382818,3383721,3384545,3386319,3386514,3388334,3389220,3390782,3390941,3391141,3393318,3393534,3395632,3401700,	3373727,3375452,3375668,3375841,3376907,3377770,3378227,3378907,3379514,3379696,3382999,3383811,3384753,3386432,3386687,3388424,3389332,3390861,3391049,3391216,3393437,3393673,3395718,3401792,
[ENSDART00000005168 ddx55 chr10:3405372-3423760 (-), NM_001006185 DDX55 chr10:3405719-3423458 (-)]	ENSDART00000005168	ddx55	chr10	-	3405369	3423760	3405659	3423649	14	3405369,3407588,3411225,3413660,3415466,3415669,3417681,3419920,3421700,3421939,3422086,3423234,3423404,3423541,	3405821,3407875,3411394,3413775,3415559,3415801,3417764,3420110,3421850,3422002,3422178,3423321,3423455,3423760,
[ENSDART00000037183 tmed2 chr10:3427333-3435132 (-), ENSDART00000133452 tmed2 chr10:3427989-3435091 (-)]	ENSDART00000037183	tmed2	chr10	-	3427337	3435132	3428172	3434987	4	3427337,3428473,3433719,3434807,	3428297,3428581,3433912,3435132,
[NM_001016832 ptpn11 chr10:3438327-3453377 (+), ENSDART00000081599 ptpn11a chr10:3435695-3460177 (+)]	ENSDART00000081599	ptpn11a	chr10	+	3435695	3460170	3435887	3456514	16	3435695,3438329,3442333,3442669,3443758,3444076,3444280,3444474,3446409,3449183,3449400,3451740,3453228,3453990,3456444,3458262,	3435901,3438452,3442528,3442862,3443878,3444190,3444377,3444554,3446568,3449315,3449555,3451808,3453380,3454103,3456545,3460170,
[ENSDART00000092684 RPH3A (2 of 2) chr10:3488895-3522704 (+)]	ENSDART00000092684	RPH3A (2 of 2)	chr10	+	3488895	3522705	3488895	3518378	16	3488895,3492681,3495380,3501489,3503404,3503546,3508325,3511489,3511685,3511886,3514335,3514552,3515251,3515580,3515838,3518244,	3489008,3492811,3495464,3501652,3503443,3503747,3508478,3511569,3511760,3511996,3514462,3514609,3515400,3515662,3515935,3522705,
[ENSDART00000003242 PLA2G3 (1 of 2) chr10:3527757-3540499 (+)]	ENSDART00000003242	PLA2G3 (1 of 2)	chr10	+	3527757	3540499	3527813	3539827	7	3527757,3530928,3531812,3534385,3536155,3538371,3539628,	3528348,3531061,3531947,3534714,3536285,3538497,3540499,
[ENSDART00000129007 TTC28 chr10:4023776-4047488 (+)]	ENSDART00000129007	TTC28	chr10	+	4023776	4048231	4023776	4047488	12	4023776,4032376,4034037,4037037,4037864,4040244,4041692,4044984,4045201,4045433,4045639,4045896,	4023805,4032521,4034217,4037546,4038112,4040369,4041924,4045061,4045225,4045563,4045747,4048231,
[ENSDART00000123086 pitpnb chr10:4054077-4094406 (+), ENSDART00000052268 pitpnb chr10:4054077-4094406 (+)]	ENSDART00000123086	pitpnb	chr10	+	4054077	4094406	4054149	4092918	10	4054077,4057901,4068015,4069018,4074941,4075127,4081313,4081479,4083517,4092867,	4054169,4057932,4068161,4069110,4075030,4075211,4081391,4081590,4083640,4094406,
[ENSDART00000125299 PLK2 (1 of 2) chr10:4318089-4327311 (-)]	ENSDART00000125299	PLK2 (1 of 2)	chr10	-	4318281	4327311	4318723	4327311	14	4318281,4319654,4321305,4321513,4323336,4323513,4323735,4323919,4324150,4324435,4325423,4325632,4325853,4327104,	4318945,4319765,4321435,4321673,4323417,4323652,4323836,4324067,4324349,4324619,4325553,4325749,4325961,4327311,
[ENSDART00000016102 CABZ01073795.1 chr10:4452091-4455744 (+)]	ENSDART00000016102	CABZ01073795.1	chr10	+	4452091	4457738	4452093	4454972	7	4452091,4452384,4452698,4453012,4453274,4454194,4454801,	4452187,4452418,4452897,4453159,4453446,4454295,4457738,
[ENSDART00000109916 GRIN3A chr10:4511583-4547733 (+), NM_001033351 Grin3a chr10:4511673-4542958 (+)]	ENSDART00000109916	GRIN3A	chr10	+	4511583	4548261	4511583	4547733	10	4511583,4527405,4536227,4537400,4539755,4539908,4540003,4542838,4543152,4547399,	4512297,4528010,4537278,4537546,4539805,4539955,4540165,4543003,4543223,4548261,
[ENSDART00000018245 CABZ01115322.1 chr10:4567979-4591256 (-), NM_001173894 lppr1 chr10:4563026-4614810 (-)]	ENSDART00000018245	CABZ01115322.1	chr10	-	4562588	4591256	4567979	4591256	13	4562588,4569723,4569876,4569905,4570011,4571702,4572076,4572729,4572962,4573587,4579754,4586249,4591199,	4568039,4569855,4569886,4569940,4570029,4571758,4572085,4572754,4572986,4573838,4579887,4586438,4591256,
[NM_001204195 PALM2 chr10:4721679-4812015 (+), ENSDART00000101431 AKAP2 chr10:4703150-4914403 (+)]	ENSDART00000101431	AKAP2	chr10	+	4703150	4922019	4703150	4914403	12	4703150,4721687,4764337,4778661,4801069,4804528,4806732,4811303,4831946,4891363,4900025,4914286,	4703260,4721733,4764418,4778792,4801184,4804550,4806834,4811969,4832029,4893497,4900219,4922019,
[ENSDART00000108595 SLC46A2 chr10:4927789-4940071 (+)]	ENSDART00000108595	SLC46A2	chr10	+	4927789	4940072	4927789	4938179	4	4927789,4934716,4937851,4938121,	4928765,4934800,4938008,4940072,
[ENSDART00000109882 LYRM7 chr10:4967864-4972610 (+)]	ENSDART00000109882	LYRM7	chr10	+	4967864	4972601	4967927	4972359	5	4967864,4968171,4968561,4970068,4972288,	4967948,4968244,4968632,4970150,4972601,
[ENSDART00000093228 zgc:136871 chr10:4973035-4983552 (-)]	ENSDART00000093228	zgc:136871	chr10	-	4973037	4983552	4973411	4983348	9	4973037,4976299,4978768,4979758,4980081,4981001,4982645,4982897,4983272,	4973514,4976433,4978951,4979977,4980225,4981114,4982768,4982975,4983552,
[ENSDART00000123048 hnrnpd chr10:5004026-5020233 (-), ENSDART00000101414 hnrnpd chr10:5004024-5020399 (-)]	ENSDART00000101414	hnrnpd	chr10	-	5007394	5020399	5005548	5020233	6	5007394,5010441,5013181,5013395,5013649,5020072,	5007952,5010538,5013313,5013557,5013818,5020399,
[ENSDART00000148277 hnrpdl chr10:5020617-5025578 (-), ENSDART00000020631 hnrpdl chr10:5020617-5027922 (-)]	ENSDART00000020631	hnrpdl	chr10	-	5020619	5027922	5022114	5027785	9	5020619,5021639,5022096,5023618,5023862,5025445,5025710,5025960,5027696,	5020916,5021743,5022185,5023780,5023968,5025577,5025872,5026129,5027922,
[ENSDART00000031165 enoph1 chr10:5029097-5040851 (+)]	ENSDART00000031165	enoph1	chr10	+	5029097	5040178	5029282	5039875	6	5029097,5029454,5032252,5035258,5037775,5039735,	5029366,5029556,5032455,5035391,5037899,5040178,
[ENSDART00000101403 tmem150c chr10:5045670-5056994 (-), ENSDART00000139825 tmem150c chr10:5045378-5062225 (-)]	ENSDART00000101403	tmem150c	chr10	-	5040181	5056994	5045670	5056994	7	5040181,5050738,5053859,5055816,5055977,5056773,5056917,	5045879,5050916,5053987,5055884,5056010,5056827,5056994,
[ENSDART00000108587 sec31a chr10:5097634-5139190 (-), ENSDART00000138537 sec31a chr10:5097524-5139190 (-)]	ENSDART00000108587	sec31a	chr10	-	5095913	5139190	5098041	5137799	28	5095913,5099045,5099710,5100780,5101743,5102320,5104927,5108976,5113837,5114036,5117096,5117392,5120629,5122793,5123106,5127600,5127754,5127923,5128239,5128997,5129244,5130293,5130618,5133086,5133271,5134678,5137720,5139010,	5098221,5099117,5099830,5101020,5101802,5102356,5105254,5109070,5113933,5114237,5117270,5117538,5120756,5122972,5123257,5127648,5127829,5128154,5128392,5129159,5129344,5130436,5130759,5133182,5133470,5134802,5137800,5139190,
[ENSDART00000132627 zgc:113274 chr10:5139243-5147690 (+)]	ENSDART00000132627	zgc:113274	chr10	+	5139243	5151592	5147206	5150032	5	5139243,5143716,5147196,5147660,5149882,	5139279,5143935,5147582,5147746,5151592,
[ENSDART00000142507 CDC42SE2 chr10:5162876-5224939 (+)]	ENSDART00000142507	CDC42SE2	chr10	+	5162876	5229029	5207157	5220476	5	5162876,5177990,5206957,5219573,5220374,	5163062,5178159,5207211,5219675,5229029,
[ENSDART00000063120 sptlc1 chr10:5237745-5268555 (+), ENSDART00000133927 sptlc1 chr10:5237728-5268562 (+)]	ENSDART00000063120	sptlc1	chr10	+	5237745	5268559	5237764	5267908	15	5237745,5240549,5243188,5243413,5246323,5248513,5248770,5250127,5251592,5251786,5256225,5261343,5262270,5267658,5267814,	5237818,5240657,5243283,5243507,5246396,5248646,5248900,5250217,5251700,5251882,5256322,5261398,5262388,5267732,5268559,
[ENSDART00000114491 ror2 chr10:5271455-5410911 (+)]	ENSDART00000114491	ror2	chr10	+	5271455	5410912	5271784	5410070	9	5271455,5371706,5386010,5389077,5400072,5404162,5407898,5408235,5408642,	5271878,5371787,5386307,5389108,5400194,5404465,5408156,5408441,5410912,
[ENSDART00000138821 nfil3 chr10:5417625-5422658 (+), ENSDART00000063101 nfil3 chr10:5417644-5422656 (+)]	ENSDART00000063101	nfil3	chr10	+	5417644	5422664	5421002	5422391	2	5417644,5420862,	5417786,5422664,
[ENSDART00000063093 auh chr10:5425976-5479092 (+)]	ENSDART00000063093	auh	chr10	+	5425976	5479090	5426004	5478507	10	5425976,5426645,5428791,5433257,5435931,5437606,5465324,5470596,5476101,5478429,	5426224,5426713,5428879,5433344,5436024,5437663,5465512,5470647,5476149,5479090,
[ENSDART00000005292 syk chr10:5540465-5571739 (-), ENSDART00000141943 syk chr10:5539533-5584889 (-)]	ENSDART00000005292	syk	chr10	-	5537245	5571739	5540465	5571739	14	5537245,5540444,5541632,5543660,5544485,5545374,5548816,5551806,5560545,5563838,5563950,5567669,5569216,5571337,	5537404,5540538,5541745,5543801,5544675,5545584,5548973,5551885,5560629,5563949,5563986,5567670,5569377,5571739,
[ENSDART00000075211 psd3l chr10:5648616-5832088 (+), ENSDART00000145864 psd3l chr10:5627796-5832088 (+)]	ENSDART00000075211	psd3l	chr10	+	5648616	5832088	5648616	5829514	14	5648616,5655806,5700547,5714760,5716598,5720739,5735392,5787903,5808094,5815652,5819916,5820313,5822959,5829313,	5649272,5656241,5700739,5714841,5716711,5720798,5735482,5787947,5808285,5815723,5820074,5820458,5823103,5832088,
[NM_001012647 FUT10 chr10:5854911-5858219 (+), ENSDART00000042311 fut10 chr10:5853827-5862899 (+)]	ENSDART00000042311	fut10	chr10	+	5853827	5864444	5853916	5862879	4	5853827,5854806,5857623,5862660,	5854015,5855047,5858459,5864444,
[ENSDART00000114349 nrg1 chr10:5882253-5984608 (-), ENSDART00000123161 nrg1 chr10:5882253-5945444 (-), ENSDART00000129453 nrg1 chr10:5883030-6070456 (-), ENSDART00000122179 nrg1 chr10:5882253-6070492 (-), ENSDART00000099018 nrg1 chr10:5882253-5984608 (-), ENSDART00000124209 nrg1 chr10:5882253-6070456 (-)]	ENSDART00000129453	nrg1	chr10	-	5880957	6070456	5883030	6070456	11	5880957,5885933,5886415,5888987,5889242,5893680,5900671,5910106,5969086,5972283,6069981,	5883682,5886134,5886543,5889102,5889345,5893704,5900730,5910245,5969208,5972458,6070456,
[ENSDART00000074986 wrn chr10:6081855-6153459 (-), ENSDART00000136531 wrn chr10:6081677-6153793 (-)]	ENSDART00000074986	wrn	chr10	-	6081462	6153459	6081855	6153459	35	6081462,6091927,6092378,6095080,6096975,6098141,6098597,6100184,6100530,6102894,6103052,6105843,6106179,6110389,6110599,6113771,6113958,6117459,6119242,6119519,6120796,6126153,6128649,6129217,6130093,6131873,6132260,6133673,6142459,6142673,6143097,6146193,6149502,6152303,6153405,	6081969,6092068,6092498,6095217,6097126,6098279,6098712,6100297,6100612,6102974,6103116,6105938,6106350,6110519,6110692,6113873,6114140,6117634,6119430,6119626,6120879,6126222,6128758,6129285,6130169,6131973,6132335,6133989,6142568,6142716,6143247,6146342,6149648,6152422,6153459,
[ENSDART00000145900 purg chr10:6161887-6163207 (+), ENSDART00000074984 purg chr10:6162238-6163204 (+)]	ENSDART00000074984	purg	chr10	+	6162238	6167380	6162238	6163204	2	6162238,6162643,	6162553,6167380,
[NM_001160704 ubxd6 chr10:6222439-6234410 (-), ENSDART00000074971 zgc:112045 chr10:6221830-6234473 (-)]	ENSDART00000074971	zgc:112045	chr10	-	6221837	6234473	6222198	6234440	8	6221837,6222442,6222614,6227525,6233364,6233584,6233746,6234364,	6222369,6222517,6222656,6227657,6233487,6233658,6233872,6234473,
[ENSDART00000058695 hint1 chr10:6234943-6238930 (+)]	ENSDART00000058695	hint1	chr10	+	6234943	6238929	6234989	6238793	3	6234943,6235798,6238628,	6235100,6235903,6238929,
[ENSDART00000039388 pcyox1 chr10:6251316-6269352 (-)]	ENSDART00000039388	pcyox1	chr10	-	6251316	6269352	6251435	6264932	7	6251316,6256722,6257111,6257549,6263120,6264820,6269225,	6252106,6256875,6257323,6257724,6263327,6264965,6269352,
[ENSDART00000058724 fam136a chr10:6269582-6271082 (+)]	ENSDART00000058724	fam136a	chr10	+	6269582	6271083	6269582	6271082	2	6269582,6270941,	6269669,6271083,
[ENSDART00000149643 si:ch211-57m13.1 chr10:6277950-6283505 (+)]	ENSDART00000149643	si:ch211-57m13.1	chr10	+	6277950	6282964	6278007	6282451	9	6277950,6279128,6280513,6280932,6281128,6281483,6281948,6282332,6282622,	6278137,6279845,6280744,6281030,6281179,6281865,6282125,6282462,6282964,
[ENSDART00000148571 si:ch211-57m13.10 chr10:6412391-6417787 (+)]	ENSDART00000148571	si:ch211-57m13.10	chr10	+	6412391	6416700	6412468	6416370	9	6412391,6413557,6414197,6414650,6414849,6415223,6415688,6416072,6416360,	6412598,6414040,6414449,6414748,6414900,6415605,6415865,6416202,6416700,
[ENSDART00000125262 vasa chr10:6548806-6570246 (+), ENSDART00000149334 vasa chr10:6548823-6570246 (+), ENSDART00000121729 vasa chr10:6549298-6569606 (+), ENSDART00000128866 vasa chr10:6548806-6570246 (+), ENSDART00000105384 vasa chr10:6548806-6570246 (+), ENSDART00000149095 vasa chr10:6548794-6569928 (+), ENSDART00000148772 vasa chr10:6548808-6570246 (+)]	ENSDART00000149334	vasa	chr10	+	6548823	6570246	6549298	6569606	27	6548823,6549276,6549651,6554758,6556731,6557311,6557494,6558447,6558557,6558871,6558981,6559203,6559325,6559432,6559640,6561124,6561252,6561631,6562313,6562606,6564350,6564591,6564921,6565692,6565874,6567752,6569516,	6548869,6549322,6549682,6554806,6556764,6557362,6557548,6558474,6558632,6558898,6559056,6559242,6559352,6559483,6559682,6561160,6561297,6561774,6562466,6562761,6564480,6564758,6565067,6565792,6566145,6567860,6570246,
[ENSDART00000041068 SLC38A9 chr10:6572386-6609192 (+), NM_001102163 SLC38A9 chr10:6579004-6603739 (+)]	ENSDART00000041068	SLC38A9	chr10	+	6572386	6609192	6575919	6609023	15	6572386,6575889,6578967,6581432,6582632,6582787,6585003,6585299,6589918,6592787,6598472,6601221,6603592,6606410,6608857,	6572458,6576002,6579097,6581551,6582696,6582881,6585174,6585356,6590116,6592895,6598579,6601335,6603741,6606500,6609192,
[ENSDART00000018017 gmcl1 chr10:6689333-6717917 (-)]	ENSDART00000018017	gmcl1	chr10	-	6689999	6717917	6690406	6716571	15	6689999,6690622,6693994,6694220,6694378,6700946,6701162,6704122,6704297,6704436,6708407,6712499,6712679,6716395,6717733,	6690547,6690710,6694140,6694296,6694448,6701087,6701253,6704207,6704363,6704549,6708505,6712596,6712803,6716582,6717917,
[ENSDART00000075563 SNX24 chr10:6755780-6763439 (-)]	ENSDART00000075563	SNX24	chr10	-	6755779	6763439	6756152	6762878	7	6755779,6758500,6759114,6759241,6759416,6762382,6762809,	6756223,6758565,6759144,6759336,6759521,6762466,6763439,
[ENSDART00000141824 SFTPB (1 of 2) chr10:6826586-6833510 (+)]	ENSDART00000141824	SFTPB (1 of 2)	chr10	+	6826586	6834292	6826586	6832579	7	6826586,6828743,6830512,6831370,6831604,6832312,6832543,	6826701,6828824,6830696,6831510,6831685,6832423,6834292,
[ENSDART00000111065 smtna chr10:6904420-6916833 (-), ENSDART00000145480 smtna chr10:6903575-6920692 (-)]	ENSDART00000111065	smtna	chr10	-	6901159	6916833	6904420	6916833	7	6901159,6909539,6909828,6910038,6910193,6916532,6916716,	6904571,6909691,6909952,6910102,6910325,6916608,6916833,
[ENSDART00000147368 osbp2 chr10:6945219-7002655 (-), ENSDART00000075524 osbp2 chr10:6946517-7002619 (-)]	ENSDART00000147368	osbp2	chr10	-	6945219	7002655	6946517	7002655	14	6945219,6949285,6950674,6950980,6955392,6955737,6957942,6958272,6961911,6962690,6964712,6967089,6996640,7002497,	6946660,6949506,6950859,6951076,6955496,6955858,6958188,6958424,6961982,6962814,6964881,6967340,6996846,7002655,
[ENSDART00000054119 ATP6V0A2 (2 of 2) chr10:7018004-7061385 (-), ENSDART00000140476 ATP6V0A2 (2 of 2) chr10:7017245-7061968 (-)]	ENSDART00000140476	ATP6V0A2 (2 of 2)	chr10	-	7017252	7061968	7018004	7061385	21	7017252,7020593,7020871,7024499,7026147,7028093,7029820,7030047,7033390,7034209,7034989,7038354,7038750,7042572,7042863,7048041,7050408,7053277,7054757,7061268,7061705,	7018107,7020765,7020989,7024598,7026267,7028304,7029939,7030138,7033548,7034349,7035140,7038567,7038844,7042655,7042990,7048139,7050546,7053375,7054836,7061466,7061968,
[ENSDART00000059017 NFKBIL1 chr10:7065846-7070301 (-)]	ENSDART00000059017	NFKBIL1	chr10	-	7064623	7070301	7065846	7070301	4	7064623,7068933,7069837,7070027,	7066430,7069042,7069953,7070301,
[NM_001140812 fel chr10:7074198-7074626 (-), ENSDART00000099031 zgc:136254 chr10:7073863-7075264 (-)]	ENSDART00000099031	zgc:136254	chr10	-	7073864	7075264	7073937	7075103	6	7073864,7074175,7074413,7074715,7075030,7075203,	7074082,7074303,7074625,7074943,7075115,7075264,
[ENSDART00000142714 si:ch211-251f6.7 chr10:7080501-7081885 (-), ENSDART00000099033 si:ch211-251f6.7 chr10:7080501-7081872 (-), ENSDART00000123023 si:ch211-251f6.7 chr10:7080501-7081872 (-)]	ENSDART00000142714	si:ch211-251f6.7	chr10	-	7080495	7081885	7080564	7081808	6	7080495,7080799,7081006,7081320,7081637,7081806,	7080709,7080927,7081218,7081548,7081723,7081885,
[ENSDART00000147104 si:ch211-251f6.6 chr10:7087702-7089073 (-), ENSDART00000099030 si:ch211-251f6.6 chr10:7087772-7089072 (-)]	ENSDART00000099030	si:ch211-251f6.6	chr10	-	7087700	7089072	7087772	7089072	6	7087700,7088013,7088222,7088518,7088836,7089028,	7087917,7088135,7088434,7088746,7088922,7089072,
[ENSDART00000059014 si:ch211-251f6.3 chr10:7106468-7108237 (-)]	ENSDART00000059014	si:ch211-251f6.3	chr10	-	7106469	7108237	7106544	7108237	6	7106469,7107173,7107386,7107682,7108000,7108192,	7106689,7107301,7107598,7107910,7108086,7108237,
[ENSDART00000143848 SUB1 (1 of 2) chr10:7119643-7126592 (+), ENSDART00000075485 SUB1 (1 of 2) chr10:7119643-7126599 (+)]	ENSDART00000075485	SUB1 (1 of 2)	chr10	+	7119643	7126592	7120195	7126367	5	7119643,7120194,7123580,7123797,7126287,	7119752,7120264,7123694,7123906,7126592,
[ENSDART00000123447 PSTPIP2 (1 of 2) chr10:7160081-7167069 (+)]	ENSDART00000123447	PSTPIP2 (1 of 2)	chr10	+	7160081	7167064	7160081	7165267	6	7160081,7162861,7164903,7165085,7165211,7165443,	7160192,7162958,7164973,7165120,7165282,7167064,
[ENSDART00000026244 skiv2l2 chr10:7220902-7289147 (+)]	ENSDART00000026244	skiv2l2	chr10	+	7220902	7289170	7220925	7288965	27	7220902,7221761,7225261,7225399,7225544,7228492,7228761,7231626,7236238,7236768,7240075,7245984,7251196,7253985,7256252,7258994,7259742,7260016,7262354,7264966,7267005,7274908,7275199,7281256,7286009,7286905,7288912,	7221023,7221899,7225328,7225462,7225657,7228667,7228852,7231751,7236337,7236886,7240207,7246064,7251307,7254087,7256378,7259145,7259915,7260085,7262480,7265077,7267194,7275072,7275305,7281313,7286172,7287010,7289170,
[ENSDART00000075412 PPAP2A (2 of 2) chr10:7289025-7318348 (-), NM_001011077 ppap2a chr10:7289121-7305791 (-)]	NM_001011077	ppap2a	chr10	-	7289025	7305791	7289439	7305791	5	7289025,7292256,7297128,7301159,7305640,	7289481,7292436,7297188,7301315,7305791,
[ENSDART00000059322 CSGALNACT1 (1 of 2) chr10:7319767-7381450 (-)]	ENSDART00000059322	CSGALNACT1 (1 of 2)	chr10	-	7320281	7381450	7322037	7381450	7	7320281,7327428,7329681,7333561,7350303,7358330,7380672,	7322327,7327510,7329776,7333740,7350405,7358547,7381450,
[NM_001206253 HVCN1 chr10:7431981-7432215 (+), ENSDART00000059028 HVCN1 chr10:7425123-7436014 (+)]	ENSDART00000059028	HVCN1	chr10	+	7425123	7436019	7431418	7435571	6	7425123,7431389,7431714,7431981,7435317,7435514,	7425161,7431619,7431819,7432213,7435430,7436019,
[ENSDART00000108643 TCTN1 chr10:7439319-7450380 (-)]	ENSDART00000108643	TCTN1	chr10	-	7439127	7450380	7439319	7450380	11	7439127,7441706,7442038,7442286,7443315,7443830,7446114,7446327,7448679,7449034,7450322,	7439466,7441847,7442192,7442424,7443331,7443909,7446240,7446465,7448700,7449147,7450380,
[ENSDART00000074553 PPTC7 (1 of 2) chr10:7462431-7494723 (+)]	ENSDART00000074553	PPTC7 (1 of 2)	chr10	+	7462431	7494732	7462431	7488974	6	7462431,7471249,7479073,7486547,7488689,7488915,	7462633,7471429,7479272,7486671,7488819,7494732,
[ENSDART00000109559 BX682234.1 chr10:7501924-7503409 (+)]	ENSDART00000109559	BX682234.1	chr10	+	7501924	7504031	7501924	7503409	5	7501924,7502117,7502873,7503114,7503300,	7502039,7502489,7503019,7503209,7504031,
[ENSDART00000084353 si:ch211-193e13.4 chr10:7557849-7596243 (+), ENSDART00000132036 si:ch211-193e13.4 chr10:7557849-7596243 (+)]	ENSDART00000132036	si:ch211-193e13.4	chr10	+	7557849	7603485	7557849	7596243	9	7557849,7575362,7576777,7578026,7581976,7584019,7591168,7593008,7595838,	7558043,7575459,7576885,7578133,7582091,7584085,7591358,7593163,7603485,
[ENSDART00000132166 si:dkeyp-35f12.3 chr10:7640531-7644938 (+), ENSDART00000003775 si:dkeyp-35f12.3 chr10:7615648-7650378 (+)]	ENSDART00000003775	si:dkeyp-35f12.3	chr10	+	7615648	7650381	7615648	7644840	12	7615648,7621509,7626492,7629682,7629944,7631988,7634069,7634342,7637826,7640534,7641605,7644740,	7615706,7623744,7626660,7629853,7630046,7632099,7634248,7634500,7637869,7640721,7641741,7650381,
[ENSDART00000027179 st8sia4 chr10:7657528-7673632 (-)]	ENSDART00000027179	st8sia4	chr10	-	7652481	7673632	7657778	7673632	6	7652481,7655988,7659437,7662083,7666215,7673516,	7655934,7658061,7659731,7662341,7666341,7673632,
[ENSDART00000061639 PAM chr10:7692649-7777015 (+), ENSDART00000136976 PAM chr10:7679255-7777017 (+)]	ENSDART00000061639	PAM	chr10	+	7692649	7777015	7692649	7776398	24	7692649,7694114,7700230,7706437,7713747,7715417,7715645,7718653,7721440,7721639,7727413,7734652,7735007,7754693,7756590,7756809,7759260,7762279,7765090,7768306,7769565,7771613,7772015,7776219,	7692741,7694235,7700288,7706525,7713839,7715501,7715694,7718721,7721521,7721716,7727517,7734849,7735058,7754823,7756707,7756882,7759471,7762483,7765209,7768406,7769619,7771931,7772078,7777015,
[ENSDART00000075982 ankrd55 chr10:7814065-7837635 (-)]	ENSDART00000075982	ankrd55	chr10	-	7814060	7837635	7814283	7837386	11	7814060,7816372,7818329,7823055,7823800,7826968,7827489,7829819,7832030,7834429,7837346,	7814546,7816462,7818985,7823223,7823985,7827097,7827550,7829929,7832161,7834549,7837635,
[ENSDART00000126052 MAP3K1 chr10:7894108-7992183 (+), ENSDART00000139062 MAP3K1 chr10:7940415-7990492 (+)]	ENSDART00000126052	MAP3K1	chr10	+	7894108	7992186	7894108	7990388	20	7894108,7940421,7946813,7948655,7950515,7951127,7952033,7954549,7960191,7962345,7973079,7973550,7973731,7976490,7978630,7979840,7981939,7982269,7987879,7990238,	7894536,7940572,7947026,7948850,7950632,7951276,7952155,7954631,7960387,7962594,7973201,7973642,7973924,7977748,7978783,7980003,7982071,7982412,7988011,7992186,
[ENSDART00000074640 BX322605.2 chr10:8022329-8023426 (-)]	ENSDART00000074640	BX322605.2	chr10	-	8019737	8023426	8022299	8023426	8	8019737,8022489,8022609,8022770,8022821,8023051,8023183,8023345,	8022418,8022607,8022665,8022819,8023049,8023117,8023234,8023426,
[ENSDART00000074574 zgc:114200 chr10:8368898-8386382 (+), NM_001191403 APH1B chr10:8369262-8372164 (+)]	ENSDART00000074574	zgc:114200	chr10	+	8368898	8386368	8369262	8385730	7	8368898,8372115,8375747,8375936,8377486,8382329,8385701,	8369375,8372286,8375821,8376059,8377614,8382453,8386368,
[ENSDART00000031322 ca9 chr10:8401205-8439965 (-)]	ENSDART00000031322	ca9	chr10	-	8401205	8439965	8403084	8439965	11	8401205,8403273,8405197,8406103,8412708,8412939,8413127,8415596,8416730,8419868,8439856,	8403172,8403385,8405254,8406227,8412866,8413006,8413220,8415739,8416901,8419901,8439965,
[ENSDART00000056951 dcp2 chr10:8458720-8479699 (-)]	ENSDART00000056951	dcp2	chr10	-	8458723	8479699	8459582	8479466	11	8458723,8461728,8461858,8465006,8469444,8469628,8471854,8472100,8472285,8475641,8479413,	8459719,8461780,8461939,8465136,8469540,8469741,8472007,8472199,8472413,8475793,8479699,
[NM_001091154 MGC81039 chr10:8481943-8496478 (+), ENSDART00000074555 reep5 chr10:8481813-8503694 (+)]	ENSDART00000074555	reep5	chr10	+	8481813	8503598	8481943	8503160	5	8481813,8482258,8496351,8502854,8503110,	8482061,8482352,8496490,8503023,8503598,
[ENSDART00000085727 CHD1 chr10:8523588-8589277 (+), NM_001107465 Chd1 chr10:8526215-8587983 (+)]	ENSDART00000085727	CHD1	chr10	+	8523588	8589277	8523588	8588088	36	8523588,8526217,8527702,8527912,8528075,8532390,8532890,8533201,8536948,8537202,8541143,8541454,8543958,8544403,8546656,8550187,8550429,8551580,8554655,8557137,8557315,8561232,8561954,8563556,8563683,8564052,8568392,8568650,8570995,8574154,8576756,8579313,8579577,8579925,8582648,8587784,	8523641,8526410,8527819,8527965,8528216,8532656,8533116,8533302,8537127,8537327,8541360,8541544,8544149,8544592,8546819,8550340,8550501,8551730,8554804,8557234,8557411,8561409,8562118,8563598,8563817,8564191,8568543,8568773,8571139,8574412,8576870,8579492,8579677,8579977,8582883,8589277,
[ENSDART00000123173 REEP5 (1 of 2) chr10:8592685-8614404 (-), NM_005669 REEP5 chr10:8507849-8614336 (-)]	ENSDART00000123173	REEP5 (1 of 2)	chr10	-	8592685	8614404	8593123	8614336	5	8592685,8593260,8599795,8613927,8614218,	8593173,8593429,8599934,8614021,8614404,
[ENSDART00000098885 DCP2 (1 of 2) chr10:8616815-8636669 (+), NM_001140967 dcp2 chr10:8616787-8626654 (+)]	ENSDART00000098885	DCP2 (1 of 2)	chr10	+	8616815	8637525	8616815	8636669	12	8616815,8620488,8623868,8624082,8624274,8626540,8626741,8631145,8634342,8634501,8636532,8637147,	8616868,8620640,8623996,8624181,8624427,8626653,8626837,8631275,8634423,8634553,8637147,8637525,
[ENSDART00000129643 aplnrb chr10:8719517-8721599 (+)]	ENSDART00000129643	aplnrb	chr10	+	8719517	8721599	8719580	8720660	1	8719517,	8721599,
[ENSDART00000123131 pmaip1 chr10:8746744-8746979 (+)]	ENSDART00000123131	pmaip1	chr10	+	8746744	8747888	8746744	8746979	2	8746744,8746854,	8746757,8747888,
[ENSDART00000080763 GOLPH3 (2 of 2) chr10:8751138-8763305 (-)]	ENSDART00000080763	GOLPH3 (2 of 2)	chr10	-	8749600	8763305	8751207	8763090	4	8749600,8752812,8760512,8762877,	8751632,8752927,8760644,8763305,
[ENSDART00000011987 isl1l chr10:8771214-8778379 (+)]	ENSDART00000011987	isl1l	chr10	+	8771214	8778373	8771275	8777418	6	8771214,8771429,8772526,8775266,8777101,8777313,	8771309,8771619,8772762,8775541,8777233,8778373,
[ENSDART00000145596 ITGA1 chr10:8821472-8931523 (+), ENSDART00000112101 ITGA1 chr10:8821538-8934220 (+)]	ENSDART00000112101	ITGA1	chr10	+	8821538	8934211	8821538	8931446	30	8821538,8858082,8866430,8871475,8881874,8883775,8884847,8889441,8890100,8890816,8892990,8895869,8897798,8900130,8903147,8906882,8910012,8915780,8918999,8919409,8919624,8920216,8920398,8922789,8925487,8925685,8928483,8928691,8930807,8931383,	8821581,8858203,8866543,8871567,8881989,8883897,8884996,8889592,8890275,8890890,8893135,8896012,8897942,8900391,8903278,8907046,8910149,8915891,8919076,8919536,8919705,8920293,8920488,8922898,8925601,8925787,8928594,8928787,8930921,8934211,
[ENSDART00000122223 ITGA2 (2 of 2) chr10:8951526-8974687 (+), ENSDART00000141045 ITGA2 (2 of 2) chr10:8965679-8974690 (+)]	ENSDART00000141045	ITGA2 (2 of 2)	chr10	+	8965679	8974687	8965679	8974210	8	8965679,8967936,8968157,8968360,8970497,8970691,8972104,8974120,	8965772,8968039,8968268,8968471,8970611,8970781,8972221,8974687,
[ENSDART00000064968 rasgef1bb chr10:9249763-9275152 (+), NM_001195367 RASGEF1B chr10:9255307-9272017 (+)]	ENSDART00000064968	rasgef1bb	chr10	+	9249763	9275150	9255217	9274745	14	9249763,9255210,9255508,9259404,9259885,9263928,9264119,9264806,9265026,9267633,9267818,9268008,9271934,9274723,	9250094,9255400,9255631,9259542,9260107,9264003,9264212,9264909,9265106,9267729,9267914,9268132,9272007,9275150,
[ENSDART00000139783 si:dkeyp-41f9.4 chr10:9280549-9282935 (-)]	ENSDART00000139783	si:dkeyp-41f9.4	chr10	-	9275749	9282935	9277135	9282862	4	9275749,9280487,9282058,9282844,	9278103,9280695,9282253,9282935,
[ENSDART00000145879 paqr3b chr10:9312960-9325931 (+), ENSDART00000064973 paqr3b chr10:9312960-9325930 (+)]	ENSDART00000145879	paqr3b	chr10	+	9312960	9325930	9313843	9324369	7	9312960,9313829,9314739,9319341,9319920,9320233,9324238,	9313130,9314028,9314902,9319497,9320118,9320324,9325930,
[ENSDART00000139156 slc37a4b chr10:9372475-9375659 (+)]	ENSDART00000139156	slc37a4b	chr10	+	9372475	9375741	9372475	9375241	3	9372475,9374569,9375074,	9372543,9374708,9375741,
[ENSDART00000039536 mrrf chr10:9395534-9436845 (-)]	ENSDART00000039536	mrrf	chr10	-	9395534	9436845	9396012	9425137	8	9395534,9398487,9407403,9411753,9424544,9424965,9425255,9436719,	9396090,9398647,9407495,9411872,9424697,9425153,9425307,9436845,
[ENSDART00000080843 ndufa8 chr10:9500788-9510479 (+)]	ENSDART00000080843	ndufa8	chr10	+	9500788	9510476	9500919	9510324	4	9500788,9506303,9508771,9510186,	9500970,9506467,9508937,9510476,
[ENSDART00000144214 sh2d3ca chr10:10176350-10240058 (+), ENSDART00000029457 sh2d3ca chr10:10144144-10244373 (+)]	ENSDART00000029457	sh2d3ca	chr10	+	10144144	10244373	10144144	10240058	12	10144144,10153028,10160976,10213749,10220446,10224900,10227748,10231084,10235030,10235739,10236772,10239882,	10144163,10153731,10161016,10213878,10220874,10225025,10228239,10231200,10235202,10235851,10236979,10244373,
[ENSDART00000129952 URM1 chr10:10278939-10291840 (+), ENSDART00000142895 URM1 chr10:10278919-10291921 (+)]	ENSDART00000129952	URM1	chr10	+	10278939	10291750	10278960	10291306	5	10278939,10283241,10289831,10290847,10291237,	10278995,10283312,10289913,10290893,10291750,
[ENSDART00000109432 CERCAM chr10:10317580-10346027 (+), NM_001102035 CERCAM chr10:10317764-10337898 (+)]	ENSDART00000109432	CERCAM	chr10	+	10317580	10347060	10317668	10346027	12	10317580,10320884,10321111,10323989,10326183,10326552,10330079,10330230,10330450,10332685,10337696,10345792,	10317871,10320995,10321229,10324124,10326388,10326672,10330156,10330337,10330583,10332813,10337900,10347060,
[ENSDART00000080904 sardh chr10:10353223-10527714 (+), ENSDART00000129253 sardh chr10:10353284-10527711 (+), ENSDART00000131043 sardh chr10:10354808-10527711 (+)]	ENSDART00000131043	sardh	chr10	+	10354808	10527711	10354808	10527065	21	10354808,10356785,10359611,10364005,10365241,10383080,10398596,10412870,10443442,10447883,10456856,10457351,10458751,10460451,10460731,10483765,10501647,10509800,10511334,10526912,10527622,	10355130,10356964,10359791,10364129,10365342,10383185,10398726,10412957,10443533,10448025,10456940,10457465,10458890,10460565,10460879,10483859,10501810,10509969,10511470,10527096,10527711,
[ENSDART00000112135 FAM163B chr10:10644146-10666665 (+), ENSDART00000136853 FAM163B chr10:10602132-10666665 (+)]	ENSDART00000112135	FAM163B	chr10	+	10644146	10671480	10644146	10666665	3	10644146,10666200,10666559,	10644239,10666511,10671480,
[ENSDART00000109282 C10H9orf119 chr10:10694765-10703146 (+)]	ENSDART00000109282	C10H9orf119	chr10	+	10694765	10702693	10695013	10702506	5	10694765,10696937,10697217,10701978,10702441,	10695114,10696992,10697327,10702073,10702693,
[ENSDART00000004181 slc27a4 chr10:10704775-10748706 (+), NM_001075667 SLC27A4 chr10:10724294-10741668 (+)]	ENSDART00000004181	slc27a4	chr10	+	10704775	10753042	10713574	10748469	13	10704775,10713573,10724284,10730429,10732704,10732858,10733179,10737820,10739849,10741217,10741501,10746254,10748311,	10705065,10713735,10724679,10730588,10732774,10732950,10733289,10738030,10739976,10741355,10741666,10746401,10753042,
[NM_001124386 ambp chr10:10767629-10788988 (+), ENSDART00000027026 ambpl chr10:10767459-10789768 (+)]	ENSDART00000027026	ambpl	chr10	+	10767459	10789346	10767614	10789246	10	10767459,10769019,10781372,10781531,10782735,10783275,10786039,10788696,10788953,10789217,	10767719,10769162,10781449,10781648,10782837,10783322,10786115,10788864,10789130,10789346,
[ENSDART00000122657 nrarpa chr10:10826654-10830227 (-)]	ENSDART00000122657	nrarpa	chr10	-	10826655	10830227	10829318	10829657	2	10826655,10830130,	10830052,10830227,
[ENSDART00000127331 cdc37l1 chr10:10938690-10964395 (+)]	ENSDART00000127331	cdc37l1	chr10	+	10938690	10965008	10938838	10963188	8	10938690,10945968,10946523,10946711,10950361,10953023,10953854,10963074,	10938916,10946229,10946620,10946827,10950484,10953197,10953926,10965008,
[ENSDART00000081063 ak3 chr10:10966795-10977861 (-), ENSDART00000132995 ak3 chr10:10966789-10977896 (-)]	ENSDART00000081063	ak3	chr10	-	10966795	10977861	10967839	10977632	5	10966795,10969771,10974744,10975842,10977517,	10967957,10969890,10974917,10975962,10977861,
[ENSDART00000047954 ugcg chr10:11004087-11060023 (+)]	ENSDART00000047954	ugcg	chr10	+	11004087	11062570	11004105	11058355	9	11004087,11018779,11042616,11047393,11047717,11052577,11054207,11054616,11058184,	11004338,11018921,11042719,11047495,11047830,11052756,11054294,11054803,11062570,
[ENSDART00000146727 ROD1 chr10:11112216-11227461 (-), ENSDART00000040308 ROD1 chr10:11105113-11169009 (-)]	ENSDART00000146727	ROD1	chr10	-	11104909	11227461	11112384	11169009	14	11104909,11114251,11115209,11118680,11119129,11121463,11127061,11132548,11140239,11144389,11147014,11149095,11168981,11227278,	11112517,11114329,11115426,11118773,11119163,11121603,11127136,11132723,11140350,11144557,11147161,11149265,11169060,11227461,
[ENSDART00000038888 hsdl2 chr10:11231165-11246479 (+), NM_001046971 LOC732974 chr10:11233399-11242776 (+)]	ENSDART00000038888	hsdl2	chr10	+	11231165	11246458	11231282	11246340	11	11231165,11233398,11241004,11241202,11242284,11242678,11244746,11245134,11245314,11246012,11246227,	11231299,11233562,11241103,11241317,11242388,11242777,11244941,11245206,11245455,11246141,11246458,
[ENSDART00000145673 si:ch211-126i22.5 chr10:11275709-11276665 (+)]	ENSDART00000145673	si:ch211-126i22.5	chr10	+	11275709	11276666	11275709	11276201	2	11275709,11275893,	11275795,11276666,
[ENSDART00000039145 C10H9orf80 chr10:11285866-11289030 (-)]	ENSDART00000039145	C10H9orf80	chr10	-	11285868	11289030	11286019	11288877	4	11285868,11286198,11288507,11288852,	11286118,11286289,11288604,11289030,
[ENSDART00000064215 cops4 chr10:11321779-11334372 (+)]	ENSDART00000064215	cops4	chr10	+	11321779	11334366	11321847	11333872	10	11321779,11324171,11325040,11325821,11326029,11327402,11328103,11329479,11330999,11333738,	11321921,11324251,11325192,11325925,11326183,11327553,11328274,11329595,11331084,11334366,
[ENSDART00000101045 PLAC8 (2 of 2) chr10:11348261-11351050 (-), ENSDART00000064214 PLAC8 (2 of 2) chr10:11348260-11351051 (-)]	ENSDART00000101045	PLAC8 (2 of 2)	chr10	-	11348261	11351050	11348692	11349796	4	11348261,11348883,11349711,11351015,	11348803,11349008,11349801,11351050,
[NM_001047988 ci-zf(cchc)-1 chr10:11362072-11362171 (-), ENSDART00000064212 SREK1IP1 chr10:11360423-11363486 (-)]	ENSDART00000064212	SREK1IP1	chr10	-	11360440	11363486	11360667	11363385	5	11360440,11361789,11362020,11362947,11363372,	11360854,11361865,11362173,11362995,11363486,
[ENSDART00000064210 CWC27 chr10:11364006-11467320 (+), NM_140251 CG10907 chr10:11364183-11368976 (+)]	ENSDART00000064210	CWC27	chr10	+	11364006	11467317	11364186	11467039	14	11364006,11365231,11365456,11367048,11367397,11367571,11368927,11369095,11369357,11369817,11416549,11445704,11447691,11466876,	11364228,11365328,11365569,11367192,11367496,11367672,11368997,11369175,11369382,11369969,11416650,11445817,11447804,11467317,
[ENSDART00000138748 ADAMTS6 chr10:11559893-11727823 (-), ENSDART00000009715 ADAMTS6 chr10:11559893-11727823 (-)]	ENSDART00000138748	ADAMTS6	chr10	-	11554689	11727823	11559893	11727823	24	11554689,11563370,11570729,11570996,11575888,11577680,11587501,11591330,11596783,11603208,11607031,11615963,11624900,11631411,11643757,11650905,11654309,11669698,11700272,11706158,11706374,11707410,11722174,11727735,	11560003,11563527,11570906,11571201,11576018,11577819,11587665,11591411,11596907,11603342,11607134,11616027,11625046,11631519,11643899,11651052,11654415,11669742,11700418,11706242,11706592,11707579,11722539,11727823,
[ENSDART00000092047 ppwd1 chr10:11733686-11754461 (+)]	ENSDART00000092047	ppwd1	chr10	+	11733686	11755167	11733702	11754402	11	11733686,11734041,11735001,11735232,11739460,11740006,11745130,11745399,11745966,11752726,11754258,	11733823,11734144,11735105,11735353,11739908,11740197,11745320,11745581,11746048,11752909,11755167,
[ENSDART00000101032 TRIM23 chr10:11756200-11806249 (-), ENSDART00000127581 TRIM23 chr10:11756776-11806249 (-)]	ENSDART00000127581	TRIM23	chr10	-	11754470	11806249	11756776	11806225	11	11754470,11769478,11769716,11771417,11774969,11775183,11775489,11800828,11804795,11805012,11806138,	11756956,11769603,11769827,11771547,11775104,11775399,11775672,11801107,11804917,11805175,11806249,
[ENSDART00000081140 EPHA5 chr10:12438614-12656191 (+), NM_004439 EPHA5 chr10:12447722-12652479 (+)]	ENSDART00000081140	EPHA5	chr10	+	12438614	12660139	12438614	12653540	17	12438614,12447723,12478450,12532187,12539231,12579060,12582026,12587261,12602737,12604464,12615110,12615685,12616343,12635842,12643881,12652322,12653434,	12438699,12447788,12479114,12532343,12539567,12579185,12582186,12587364,12602805,12604590,12615296,12615747,12616553,12635992,12644075,12652478,12660139,
[ENSDART00000001253 si:busm1-57f23.1 chr10:13199889-13203157 (-)]	ENSDART00000001253	si:busm1-57f23.1	chr10	-	13199891	13203157	13200228	13202941	4	13199891,13201570,13201754,13202847,	13200315,13201672,13201906,13203157,
[ENSDART00000135082 C10H5orf28 chr10:13242868-13250959 (+), ENSDART00000122872 C10H5orf28 chr10:13247357-13255059 (+), ENSDART00000000151 C10H5orf28 chr10:13242844-13250955 (+)]	ENSDART00000122872	C10H5orf28	chr10	+	13247357	13255061	13247357	13250358	2	13247357,13250022,	13247729,13255061,
[ENSDART00000135941 il11ra chr10:13269399-13307621 (-), ENSDART00000030976 il11ra chr10:13279438-13307572 (-)]	ENSDART00000135941	il11ra	chr10	-	13270290	13307621	13279438	13307572	11	13270290,13279437,13279624,13281599,13285838,13290452,13294129,13295828,13297971,13298570,13307475,	13270949,13279517,13279727,13281677,13285995,13290619,13294314,13295943,13298132,13298637,13307621,
[ENSDART00000145103 cntfr chr10:13423919-13736637 (-), ENSDART00000032852 cntfr chr10:13423921-13636649 (-)]	ENSDART00000032852	cntfr	chr10	-	13423921	13636649	13425064	13636649	8	13423921,13434177,13439648,13492960,13500521,13504886,13564345,13636567,	13425065,13434295,13439838,13493124,13500688,13505004,13564579,13636649,
[ENSDART00000026383 sigmar1 chr10:14452414-14458029 (+), NM_001172992 Sigmar1 chr10:14454743-14457585 (+)]	ENSDART00000026383	sigmar1	chr10	+	14452414	14458033	14452512	14457642	4	14452414,14454744,14455694,14457412,	14452657,14454945,14455787,14458033,
[ENSDART00000057865 IER3IP1 chr10:14571357-14574196 (-)]	ENSDART00000057865	IER3IP1	chr10	-	14571357	14574196	14571898	14574167	3	14571357,14572445,14574076,	14571954,14572547,14574196,
[ENSDART00000140869 si:dkey-88l16.3 chr10:15011550-15045613 (+)]	ENSDART00000140869	si:dkey-88l16.3	chr10	+	15011550	15045610	15011550	15045562	27	15011550,15015146,15015396,15017554,15017849,15018344,15018694,15021189,15021453,15024334,15024589,15027089,15029063,15029271,15029643,15031097,15032713,15034735,15035038,15036048,15038052,15039173,15040688,15041587,15043374,15044888,15045520,	15011605,15015299,15015663,15017770,15018002,15018611,15018910,15021366,15021657,15024502,15024805,15027319,15029193,15029465,15029830,15031313,15032897,15034937,15035203,15036255,15038602,15039299,15040796,15041821,15043687,15045006,15045610,
[ENSDART00000135667 si:dkey-88l16.5 chr10:15053345-15059994 (+), ENSDART00000140084 si:dkey-88l16.5 chr10:15053595-15059803 (+), ENSDART00000145192 si:dkey-88l16.5 chr10:15053579-15059994 (+)]	ENSDART00000145192	si:dkey-88l16.5	chr10	+	15053579	15059995	15055947	15059349	4	15053579,15055941,15059300,15059477,	15053775,15056228,15059379,15059995,
[ENSDART00000038401 CLDN23 chr10:15075410-15077355 (-)]	ENSDART00000038401	CLDN23	chr10	-	15075418	15077355	15076482	15077325	1	15075418,	15077355,
[ENSDART00000128967 PARM1 chr10:15093501-15100733 (+)]	ENSDART00000128967	PARM1	chr10	+	15093501	15103988	15093501	15100733	4	15093501,15094019,15099659,15100651,	15093538,15094781,15099738,15103988,
[ENSDART00000142865 si:ch211-95j8.3 chr10:15117107-15120917 (+)]	ENSDART00000142865	si:ch211-95j8.3	chr10	+	15117107	15123604	15117116	15120543	4	15117107,15117283,15117446,15120288,	15117161,15117355,15117491,15123604,
[ENSDART00000141588 scpp8 chr10:15135381-15139446 (+)]	ENSDART00000141588	scpp8	chr10	+	15135381	15139807	15135700	15138979	5	15135381,15135662,15136477,15136784,15138688,	15135576,15135797,15136595,15136845,15139807,
[ENSDART00000065012 SH3BP2 chr10:15250214-15272781 (+), ENSDART00000137932 SH3BP2 chr10:15253233-15269797 (+)]	ENSDART00000065012	SH3BP2	chr10	+	15250214	15272781	15250214	15269797	13	15250214,15253229,15255514,15258236,15258469,15260716,15262487,15263368,15265504,15266307,15267788,15268356,15269641,	15250267,15253369,15255617,15258354,15258537,15260799,15262544,15263885,15265613,15266363,15267867,15268416,15272781,
[ENSDART00000139047 vldlr chr10:15283771-15333718 (+), ENSDART00000023766 vldlr chr10:15283771-15333716 (+)]	ENSDART00000139047	vldlr	chr10	+	15283771	15333716	15283879	15332859	18	15283771,15298020,15306044,15311340,15314169,15315963,15316421,15319693,15319939,15323680,15324378,15324705,15326519,15326987,15327299,15329066,15332532,15332823,	15283949,15298140,15306167,15311463,15314541,15316086,15316544,15319813,15320065,15323852,15324597,15324824,15326659,15327129,15327449,15329147,15332702,15333716,
[ENSDART00000136239 KCNV2 (1 of 2) chr10:15339384-15342725 (+), ENSDART00000111073 KCNV2 (1 of 2) chr10:15339630-15342719 (+)]	ENSDART00000111073	KCNV2 (1 of 2)	chr10	+	15339630	15342724	15339630	15342461	2	15339630,15342218,	15340698,15342724,
[ENSDART00000046274 C10H5orf44 chr10:15369341-15410459 (+)]	ENSDART00000046274	C10H5orf44	chr10	+	15369341	15410480	15369601	15410277	12	15369341,15370308,15374488,15379976,15380139,15384516,15384822,15389862,15392824,15401267,15401438,15410169,	15369647,15370377,15374588,15380061,15380267,15384589,15384867,15389996,15393026,15401368,15401586,15410480,
[ENSDART00000020665 sgta chr10:15410545-15434138 (-)]	ENSDART00000020665	sgta	chr10	-	15410545	15434138	15416527	15434074	12	15410545,15416518,15416813,15420369,15426858,15427119,15428565,15428951,15429222,15429376,15431528,15434037,	15411599,15416639,15416897,15420407,15426921,15427258,15428670,15429051,15429298,15429480,15431633,15434138,
[ENSDART00000003839 thop1 chr10:15437163-15476154 (+), ENSDART00000123818 thop1 chr10:15437262-15476159 (+)]	ENSDART00000123818	thop1	chr10	+	15437262	15476159	15437262	15476052	14	15437262,15437784,15441820,15445730,15447141,15447326,15449660,15462806,15463009,15465170,15466935,15468968,15473031,15475896,	15437303,15438044,15441969,15445835,15447244,15447487,15449796,15462949,15463173,15465372,15467122,15469097,15473168,15476159,
[ENSDART00000024450 zfand5b chr10:15631655-15641876 (+)]	ENSDART00000024450	zfand5b	chr10	+	15631655	15641869	15636899	15640773	5	15631655,15636878,15637157,15640371,15640624,	15631767,15637056,15637364,15640497,15641869,
[NM_153267 MAMDC2 chr10:15680270-15696564 (-), ENSDART00000109231 MAMDC2 (2 of 2) chr10:15677430-15701436 (-)]	ENSDART00000109231	MAMDC2 (2 of 2)	chr10	-	15677525	15701436	15677847	15701386	14	15677525,15678007,15680270,15682051,15682312,15684908,15687230,15687458,15689982,15693311,15693745,15696357,15701113,15701298,	15677924,15678092,15680530,15682210,15682406,15685174,15687371,15687552,15690266,15693419,15693830,15696608,15701218,15701436,
[ENSDART00000114483 apba1 chr10:15811998-15841848 (+), ENSDART00000140511 apba1 chr10:15805831-15841853 (+)]	ENSDART00000114483	apba1	chr10	+	15811998	15841848	15811998	15841520	12	15811998,15814828,15815029,15817053,15817680,15817895,15823624,15823908,15831699,15837563,15837747,15841448,	15813573,15814930,15815069,15817199,15817713,15817985,15823828,15824088,15831912,15837683,15837888,15841848,
[ENSDART00000136789 tjp2a chr10:15844450-15908143 (-), ENSDART00000092343 tjp2a chr10:15844440-15872808 (-)]	ENSDART00000136789	tjp2a	chr10	-	15844452	15908143	15845368	15872808	24	15844452,15847060,15848616,15851495,15853152,15854782,15854972,15855259,15855435,15855806,15857774,15858244,15858448,15859413,15859690,15863453,15865341,15867074,15867257,15868143,15869662,15872763,15889093,15908000,	15845537,15847143,15848895,15851597,15853374,15854883,15855183,15855339,15855531,15855991,15857994,15858353,15858599,15859516,15859809,15863565,15865495,15867178,15867981,15868246,15869787,15872817,15889223,15908143,
[ENSDART00000122540 aldh7a1 chr10:16035478-16056656 (-)]	ENSDART00000122540	aldh7a1	chr10	-	16035480	16056656	16035659	16056564	18	16035480,16035828,16038489,16038676,16038860,16040667,16043835,16044022,16044636,16045926,16046187,16048032,16048174,16048399,16048601,16052761,16052927,16056366,	16035714,16035904,16038563,16038774,16038977,16040774,16043920,16044117,16044678,16046024,16046265,16048077,16048307,16048523,16048682,16052827,16052981,16056656,
[ENSDART00000065036 phax chr10:16057833-16063987 (+), NM_001006575 RNUXA chr10:16059808-16063329 (+)]	ENSDART00000065036	phax	chr10	+	16057833	16063770	16057911	16063419	5	16057833,16059721,16061308,16062080,16063149,	16057989,16060308,16061429,16062164,16063770,
[ENSDART00000122922 CR396586.2 chr10:16088336-16089857 (-)]	ENSDART00000122922	CR396586.2	chr10	-	16087132	16089857	16088336	16089857	1	16087132,	16089857,
[ENSDART00000043936 megf10 chr10:16098560-16189614 (+)]	ENSDART00000043936	megf10	chr10	+	16098560	16190933	16121280	16189575	25	16098560,16121268,16123475,16124241,16129062,16137548,16137929,16138224,16146602,16155215,16155484,16157174,16158634,16169900,16170158,16170930,16175259,16175499,16175737,16178294,16178692,16180208,16181344,16184322,16189414,	16098693,16121387,16123577,16124342,16129155,16137795,16138047,16138361,16146815,16155390,16155605,16157338,16158737,16170047,16170291,16171061,16175388,16175628,16175866,16178522,16178808,16180332,16181389,16184529,16190933,
[ENSDART00000065045 prrc1 chr10:16194106-16215265 (+)]	ENSDART00000065045	prrc1	chr10	+	16194106	16215174	16197099	16214242	9	16194106,16197087,16201779,16205181,16205402,16206992,16207568,16210435,16214032,	16194183,16197190,16202169,16205324,16205505,16207156,16207672,16210538,16215174,
[NM_001106439 Slc27a3 chr10:16429117-16439339 (-), ENSDART00000067709 SLC27A3 chr10:16426984-16446293 (-)]	ENSDART00000067709	SLC27A3	chr10	-	16426987	16446293	16428979	16446293	10	16426987,16430971,16432769,16435115,16438294,16438528,16438869,16439179,16442637,16445752,	16429156,16431102,16432867,16435314,16438385,16438723,16438994,16439338,16442844,16446293,
[ENSDART00000121864 slc27a6 chr10:16452474-16491111 (+)]	ENSDART00000121864	slc27a6	chr10	+	16452474	16491322	16452474	16491111	10	16452474,16454490,16461457,16465806,16473164,16478304,16481115,16481435,16486329,16490934,	16452994,16454700,16461616,16465931,16473359,16478395,16481314,16481533,16486460,16491322,
[ENSDART00000101142 CHSY3 chr10:16543641-16699699 (+)]	ENSDART00000101142	CHSY3	chr10	+	16543641	16699699	16543641	16698551	3	16543641,16548721,16696979,	16544251,16549005,16699699,
[ENSDART00000018425 SLC12A2 (3 of 5) chr10:16851853-16888981 (-), ENSDART00000127372 SLC12A2 (3 of 5) chr10:16851853-16888981 (-)]	ENSDART00000127372	SLC12A2 (3 of 5)	chr10	-	16851399	16888981	16851853	16888981	22	16851399,16854908,16855659,16857067,16857746,16864736,16869108,16869585,16871634,16872342,16875205,16881467,16881662,16884876,16885056,16885317,16887265,16887506,16887685,16887915,16888601,16888840,	16851989,16854976,16855795,16857154,16857858,16864859,16869231,16869665,16871741,16872483,16875317,16881567,16881818,16884978,16885180,16885425,16887429,16887591,16887810,16888024,16888712,16888981,
[ENSDART00000135679 rab36 chr10:16918677-16927369 (+), ENSDART00000038577 rab36 chr10:16918677-16927358 (+)]	ENSDART00000135679	rab36	chr10	+	16918677	16927362	16919132	16927065	11	16918677,16919098,16920642,16922112,16922275,16922469,16922622,16923902,16924090,16926806,16927009,	16918717,16919186,16920734,16922187,16922377,16922534,16922674,16923999,16924163,16926926,16927362,
[ENSDART00000020122 ywhah chr10:16980963-16985015 (+)]	ENSDART00000020122	ywhah	chr10	+	16980963	16985011	16981282	16983593	2	16980963,16982939,	16981369,16985011,
[ENSDART00000080449 slc5a1 chr10:16991288-17015419 (+)]	ENSDART00000080449	slc5a1	chr10	+	16991288	17015418	16991309	17014822	15	16991288,16993616,16995216,16996137,16996315,16997871,17000753,17000917,17005139,17006004,17008099,17008331,17010071,17012096,17014607,	16991504,16993688,16995321,16996197,16996420,16997977,17000834,17001129,17005275,17006112,17008250,17008500,17010287,17012202,17015418,
[ENSDART00000108959 RNF208 chr10:17047362-17048148 (+)]	ENSDART00000108959	RNF208	chr10	+	17047362	17048484	17047362	17048148	2	17047362,17047691,	17047631,17048484,
[NM_001112874 fam166b chr10:17070016-17070411 (+), ENSDART00000114101 FAM166B chr10:17067869-17073873 (+)]	ENSDART00000114101	FAM166B	chr10	+	17067869	17073610	17067923	17073554	6	17067869,17070015,17070325,17072248,17073154,17073453,	17067988,17070239,17070480,17072381,17073376,17073610,
[NM_001001488 Atp8b1 chr10:17088620-17117412 (-), ENSDART00000109548 CR855996.1 chr10:17087655-17119607 (-)]	ENSDART00000109548	CR855996.1	chr10	-	17087655	17119607	17088503	17119607	27	17087655,17095825,17096040,17097481,17097816,17098503,17100225,17100529,17103039,17103231,17103437,17103679,17109556,17110925,17111822,17111944,17113629,17113920,17115498,17115791,17115962,17116976,17117152,17117310,17119200,17119400,17119552,	17088761,17095956,17096179,17097727,17097900,17098727,17100409,17100671,17103145,17103343,17103602,17103795,17109745,17111091,17111866,17112153,17113823,17114009,17115657,17115874,17116033,17117049,17117214,17117409,17119314,17119456,17119607,
[NM_022862 Unc13b chr10:17131099-17176261 (-), ENSDART00000126832 CR855996.2 chr10:17128335-17237271 (-)]	ENSDART00000126832	CR855996.2	chr10	-	17128334	17237271	17128822	17237271	38	17128334,17131113,17133819,17134057,17136731,17137717,17138898,17140180,17140371,17141780,17150592,17151649,17152986,17153923,17154097,17154516,17154693,17156129,17156369,17156546,17159201,17162372,17162624,17169792,17172324,17173158,17174374,17174694,17176201,17176444,17189822,17190596,17202300,17204350,17211016,17214879,17215595,17237266,	17128845,17131391,17133979,17134150,17136879,17137795,17138949,17140304,17140518,17141869,17150670,17151727,17153130,17154020,17154224,17154602,17154824,17156270,17156459,17156615,17159352,17162536,17162740,17169962,17172466,17173386,17174594,17174769,17176280,17176491,17189913,17190893,17202514,17204408,17211090,17215003,17215713,17237271,
[ENSDART00000038780 sppl3 chr10:17359361-17464098 (+), ENSDART00000122663 sppl3 chr10:17402446-17464927 (+)]	ENSDART00000122663	sppl3	chr10	+	17402446	17464927	17402446	17462828	10	17402446,17434804,17440396,17446151,17446400,17449347,17449614,17454094,17457843,17462756,	17402469,17434882,17440488,17446271,17446479,17449460,17449721,17454449,17457953,17464927,
[ENSDART00000091357 slc2a11l chr10:17516168-17531748 (-), ENSDART00000144847 slc2a11l chr10:17516164-17531748 (-)]	ENSDART00000091357	slc2a11l	chr10	-	17516168	17531748	17516782	17531720	12	17516168,17517922,17518156,17522210,17522430,17523702,17527864,17529093,17529311,17531118,17531525,17531696,	17517001,17518050,17518232,17522312,17522541,17523895,17528011,17529223,17529436,17531279,17531624,17531748,
[ENSDART00000057513 SKA1 chr10:17573495-17580459 (-), ENSDART00000145077 SKA1 chr10:17573899-17581151 (-)]	ENSDART00000057513	SKA1	chr10	-	17573496	17580459	17574060	17580429	6	17573496,17574477,17576786,17577097,17579605,17580341,	17574209,17574647,17576927,17577201,17579730,17580459,
[ENSDART00000113101 SMARCAD1 (1 of 2) chr10:17582952-17618052 (-), NM_001107864 Smarcad1 chr10:17585981-17602935 (-)]	ENSDART00000113101	SMARCAD1 (1 of 2)	chr10	-	17583132	17618052	17583230	17617731	23	17583132,17583384,17585982,17590214,17590606,17593194,17593386,17593707,17598213,17598532,17599033,17600312,17600459,17601211,17601399,17602818,17607368,17607540,17609637,17609896,17610046,17613584,17617679,	17583292,17583494,17586165,17590333,17590795,17593310,17593504,17593803,17598345,17598668,17599109,17600372,17600559,17601302,17601596,17603237,17607447,17607633,17609726,17609945,17610215,17613714,17618052,
[ENSDART00000141221 KCNN2 chr10:17622492-17704565 (+), ENSDART00000017684 KCNN2 chr10:17622151-17704565 (+)]	ENSDART00000141221	KCNN2	chr10	+	17622492	17704716	17622492	17704565	8	17622492,17627254,17668909,17671274,17672626,17675135,17700085,17704289,	17622934,17627350,17669328,17671416,17672737,17675263,17700155,17704716,
[ENSDART00000057500 drg1 chr10:17711293-17721391 (+)]	ENSDART00000057500	drg1	chr10	+	17711293	17721387	17711485	17721115	9	17711293,17711751,17714371,17714741,17714906,17716328,17716539,17718502,17721015,	17711524,17711875,17714547,17714811,17715076,17716459,17716707,17718625,17721387,
[ENSDART00000112560 STARD7 chr10:17732546-17740971 (-), ENSDART00000147553 STARD7 chr10:17730235-17740857 (-)]	ENSDART00000147553	STARD7	chr10	-	17730236	17740857	17732546	17740857	8	17730236,17734585,17734755,17735334,17738602,17738908,17739093,17740522,	17732716,17734670,17734855,17735417,17738713,17738958,17739254,17740857,
[ENSDART00000039969 slc20a1b chr10:17745085-17758385 (+)]	ENSDART00000039969	slc20a1b	chr10	+	17745085	17757271	17745110	17756626	10	17745085,17746101,17746360,17747093,17751150,17754854,17755182,17755976,17756265,17756470,	17745459,17746242,17746446,17747190,17751270,17755085,17755729,17756162,17756350,17757271,
[ENSDART00000132690 si:dkey-200l5.4 chr10:17761651-17775565 (-), ENSDART00000135376 si:dkey-200l5.4 chr10:17761651-17775594 (-)]	ENSDART00000135376	si:dkey-200l5.4	chr10	-	17761316	17775594	17761811	17775594	13	17761316,17768382,17768483,17770377,17770590,17770709,17770977,17771119,17771983,17772149,17772325,17772439,17775440,	17761843,17768400,17768513,17770410,17770620,17770736,17771010,17771146,17772055,17772182,17772358,17772493,17775594,
[ENSDART00000022899 PIGO chr10:17780751-17788744 (+), ENSDART00000135044 PIGO chr10:17778099-17790098 (+)]	ENSDART00000135044	PIGO	chr10	+	17778099	17790094	17780769	17788744	11	17778099,17780768,17783425,17783740,17783980,17784505,17784822,17786474,17786818,17788062,17788614,	17778298,17781250,17783569,17783864,17784140,17784685,17786368,17786678,17787006,17788133,17790094,
[ENSDART00000057509 si:dkey-200l5.2 chr10:17807242-17809966 (+), ENSDART00000141693 si:dkey-200l5.2 chr10:17807200-17810322 (+)]	ENSDART00000141693	si:dkey-200l5.2	chr10	+	17807200	17810313	17807200	17809966	4	17807200,17809242,17809456,17809943,	17807315,17809363,17809584,17810313,
[ENSDART00000138334 ppp2r2a chr10:18907581-18936892 (+), ENSDART00000024127 ppp2r2a chr10:18909075-18936891 (+)]	ENSDART00000024127	ppp2r2a	chr10	+	18909075	18937428	18909160	18936433	10	18909075,18913526,18917953,18919302,18922414,18926400,18926697,18928263,18930743,18936153,	18909167,18913604,18918051,18919468,18922527,18926578,18926862,18928433,18930835,18937428,
[ENSDART00000030205 bnip3lb chr10:18941371-18966165 (+)]	ENSDART00000030205	bnip3lb	chr10	+	18941371	18966160	18941421	18964216	6	18941371,18954550,18958073,18958263,18960583,18964167,	18941473,18954770,18958146,18958361,18960733,18966160,
[ENSDART00000130380 dpysl2b chr10:18977783-19022479 (+), ENSDART00000064875 dpysl2b chr10:18982488-19023153 (+), ENSDART00000146517 dpysl2b chr10:18982490-19022691 (+)]	ENSDART00000146517	dpysl2b	chr10	+	18982490	19025857	18998795	19022479	14	18982490,18998726,19000781,19003276,19003602,19006454,19007270,19007444,19011475,19013325,19013684,19019192,19019922,19022387,	18982685,18998815,19000966,19003441,19003664,19006535,19007339,19007565,19011632,19013467,19013855,19019372,19020088,19025857,
[ENSDART00000038674 C10H20orf30 (2 of 2) chr10:19047365-19051796 (+)]	ENSDART00000038674	C10H20orf30 (2 of 2)	chr10	+	19047365	19051795	19048111	19050696	4	19047365,19048087,19050344,19050555,	19047541,19048210,19050467,19051795,
[ENSDART00000132084 si:ch211-127i16.2 chr10:19461622-19528134 (-)]	ENSDART00000132084	si:ch211-127i16.2	chr10	-	19458369	19528134	19461721	19528134	11	19458369,19473199,19477887,19487536,19491277,19516412,19519823,19523113,19523373,19525170,19528061,	19462010,19473300,19477974,19487695,19491378,19516497,19519913,19523271,19523488,19525351,19528134,
[ENSDART00000097930 VSIG8 (1 of 2) chr10:19556079-19580283 (+)]	ENSDART00000097930	VSIG8 (1 of 2)	chr10	+	19556079	19581338	19558410	19579703	9	19556079,19558322,19558547,19564841,19567167,19572766,19576299,19576503,19579537,	19556127,19558442,19558639,19565011,19567372,19572919,19576422,19576642,19581338,
[ENSDART00000058425 zgc:173990 chr10:19598884-19600180 (+)]	ENSDART00000058425	zgc:173990	chr10	+	19598884	19600566	19598884	19600501	1	19598884,	19600566,
[ENSDART00000112276 zgc:173837 chr10:19625600-19627994 (+)]	ENSDART00000112276	zgc:173837	chr10	+	19625600	19628228	19625600	19628177	2	19625600,19627370,	19626293,19628228,
[ENSDART00000122463 DOK2 (2 of 2) chr10:20067832-20098417 (-), NM_001083363 DOK3 chr10:20068654-20070542 (-)]	ENSDART00000122463	DOK2 (2 of 2)	chr10	-	20065139	20098417	20067832	20098417	5	20065139,20070398,20091558,20091790,20098357,	20068720,20070571,20091673,20092087,20098417,
[ENSDART00000027612 xpo7 chr10:20104114-20135113 (+), ENSDART00000145264 xpo7 chr10:20104112-20135114 (+)]	ENSDART00000027612	xpo7	chr10	+	20104114	20135113	20104129	20133418	28	20104114,20108844,20109150,20109322,20110473,20110692,20110901,20114352,20114550,20115851,20116968,20117712,20117982,20119087,20121160,20121317,20121523,20121902,20122554,20122787,20123465,20123666,20125193,20125507,20127182,20127820,20131534,20133324,	20104147,20108991,20109244,20109489,20110539,20110797,20111067,20114426,20114670,20115998,20117141,20117906,20118088,20119223,20121234,20121398,20121587,20122011,20122661,20122876,20123573,20123749,20125408,20125646,20127343,20127919,20131662,20135113,
[ENSDART00000138120 C10HXorf26 chr10:20136999-20139945 (-)]	ENSDART00000138120	C10HXorf26	chr10	-	20137517	20139945	20137765	20139915	6	20137517,20138234,20139031,20139261,20139420,20139885,	20137878,20138346,20139172,20139321,20139486,20139945,
[ENSDART00000141953 EPB49 chr10:20141544-20181526 (+), ENSDART00000064615 EPB49 chr10:20162199-20181525 (+)]	ENSDART00000064615	EPB49	chr10	+	20162199	20181525	20162199	20180477	12	20162199,20162537,20165718,20166721,20168680,20170032,20170189,20171697,20171978,20173955,20178374,20180363,	20162208,20162600,20165874,20166766,20168813,20170077,20170333,20171807,20172084,20174020,20178455,20181525,
[ENSDART00000080016 ppp3ccb chr10:20214095-20268316 (+), NM_001098076 PPP3CC chr10:20229962-20267827 (+)]	ENSDART00000080016	ppp3ccb	chr10	+	20214095	20270355	20214399	20267908	14	20214095,20229963,20231198,20244449,20248974,20252242,20252612,20252781,20255197,20255486,20258805,20260828,20263748,20267732,	20214451,20230161,20231323,20244561,20249120,20252382,20252690,20252876,20255323,20255564,20258875,20260926,20263775,20270355,
[ENSDART00000111097 C10H8orf4 (2 of 2) chr10:20290435-20290756 (+)]	ENSDART00000111097	C10H8orf4 (2 of 2)	chr10	+	20290435	20291108	20290435	20290756	1	20290435,	20291108,
[ENSDART00000080143 sfrp1b chr10:20385345-20390946 (-), NM_001087488 sfrp1 chr10:20385967-20390650 (-)]	ENSDART00000080143	sfrp1b	chr10	-	20385346	20390946	20385805	20390782	3	20385346,20388532,20390286,	20386131,20388613,20390946,
[ENSDART00000080395 golga7 chr10:20398087-20406075 (+)]	ENSDART00000080395	golga7	chr10	+	20398087	20406077	20398359	20404018	6	20398087,20399132,20402511,20402741,20403973,20405192,	20398368,20399255,20402664,20402843,20404030,20406077,
[ENSDART00000127848 LOXL2 (2 of 3) chr10:20441708-20480325 (-)]	ENSDART00000127848	LOXL2 (2 of 3)	chr10	-	20439538	20480325	20441708	20480325	12	20439538,20443215,20444178,20444393,20447391,20448278,20453347,20453615,20457861,20460237,20468064,20480148,	20441776,20443327,20444315,20444509,20447632,20448444,20453515,20453767,20458045,20460454,20468273,20480325,
[NM_002318 LOXL2 chr10:20490592-20510299 (-), ENSDART00000064613 loxl2a chr10:20489092-20526754 (-)]	ENSDART00000064613	loxl2a	chr10	-	20486915	20526754	20489092	20526754	13	20486915,20490595,20491545,20491760,20494734,20495603,20500848,20501124,20505230,20507613,20510144,20525025,20526486,	20489160,20490707,20491682,20491876,20494975,20495769,20501016,20501276,20505414,20507830,20510353,20525201,20526754,
[ENSDART00000091156 tacc1 chr10:20541755-20554456 (-)]	ENSDART00000091156	tacc1	chr10	-	20538748	20554456	20541755	20554456	11	20538748,20542365,20544005,20544191,20544443,20545083,20545329,20546628,20550023,20551073,20553800,	20541824,20542486,20544112,20544361,20544487,20545160,20545424,20546679,20550180,20551134,20554456,
[NM_001075598 DDHD2 chr10:20585123-20600789 (-), ENSDART00000114824 ddhd2 chr10:20584607-20603536 (-)]	NM_001075598	DDHD2	chr10	-	20584710	20600789	20585123	20600789	12	20584710,20586427,20586872,20586935,20587539,20589416,20589755,20596663,20596820,20598801,20599045,20600705,	20585166,20586534,20586914,20586977,20587699,20589430,20589821,20596720,20597021,20598849,20599156,20600789,
[NM_001124451 LOC100136172 chr10:20711851-20712319 (+), ENSDART00000064666 prnprs1 chr10:20709902-20713984 (+)]	ENSDART00000064666	prnprs1	chr10	+	20709902	20713670	20711659	20713480	2	20709902,20711652,	20709969,20713670,
[ENSDART00000080391 sprn2 chr10:20717180-20718283 (-)]	ENSDART00000080391	sprn2	chr10	-	20714435	20718283	20717856	20718264	1	20714435,	20718283,
[ENSDART00000142028 rassf2l chr10:20722205-20731507 (-), ENSDART00000064662 rassf2l chr10:20722206-20731507 (-)]	ENSDART00000064662	rassf2l	chr10	-	20722206	20731507	20722642	20726518	10	20722206,20722805,20724060,20724752,20724982,20725223,20726075,20726295,20726462,20731285,	20722706,20722903,20724182,20724906,20725131,20725315,20726215,20726371,20726564,20731507,
[ENSDART00000139733 PCDH1 (2 of 2) chr10:21001568-21135264 (-), ENSDART00000091004 PCDH1 (2 of 2) chr10:20998370-21128021 (-)]	ENSDART00000091004	PCDH1 (2 of 2)	chr10	-	20998370	21128021	21001568	21128021	4	20998370,21052858,21124467,21127229,	21001942,21053078,21126654,21128021,
[NM_001141235 avr3 chr10:21442816-21443020 (-), ENSDART00000125167 BX465186.1 chr10:21440455-21443248 (-)]	ENSDART00000125167	BX465186.1	chr10	-	21440331	21443248	21440455	21443248	4	21440331,21440593,21442818,21443116,	21440498,21440714,21443029,21443248,
[ENSDART00000064558 etf1 chr10:21515921-21525089 (+)]	ENSDART00000064558	etf1	chr10	+	21515921	21524981	21516448	21523602	11	21515921,21516425,21517960,21518356,21521366,21521596,21521871,21522184,21522454,21523290,21523519,	21516087,21516534,21518136,21518496,21521505,21521787,21522001,21522355,21522519,21523438,21524981,
[ENSDART00000140113 fbxw11b chr10:21525858-21551798 (+), ENSDART00000019252 fbxw11b chr10:21525869-21551794 (+)]	ENSDART00000019252	fbxw11b	chr10	+	21525869	21551783	21525909	21546763	13	21525869,21530404,21533102,21533516,21533938,21537571,21540171,21540463,21543139,21543744,21544579,21546601,21550919,	21525936,21530464,21533343,21533703,21534029,21537709,21540290,21540713,21543258,21543855,21544658,21546766,21551783,
[ENSDART00000064545 fgf18b chr10:21552520-21565270 (-)]	ENSDART00000064545	fgf18b	chr10	-	21552519	21565270	21555649	21565270	5	21552519,21558522,21562147,21562427,21565238,	21555934,21558629,21562325,21562467,21565270,
[ENSDART00000019005 BX957322.1 chr10:21592964-21601958 (+)]	ENSDART00000019005	BX957322.1	chr10	+	21592964	21602237	21592964	21601958	4	21592964,21597948,21598109,21601698,	21595430,21598010,21598222,21602237,
[ENSDART00000131097 BX957322.2 chr10:21604159-21616378 (+)]	ENSDART00000131097	BX957322.2	chr10	+	21604159	21616381	21604159	21611880	2	21604159,21611856,	21606559,21616381,
[ENSDART00000029122 zgc:165539 chr10:21623187-21625302 (-), ENSDART00000146761 zgc:165539 chr10:21623134-21623907 (-), ENSDART00000134502 zgc:165539 chr10:21623134-21623933 (-), ENSDART00000132207 zgc:165539 chr10:21623129-21626322 (-)]	ENSDART00000029122	zgc:165539	chr10	-	21623131	21625302	21623187	21625302	3	21623131,21624096,21624801,	21623745,21624627,21625302,
[ENSDART00000126629 CR774179.2 chr10:22081319-22082311 (+)]	ENSDART00000126629	CR774179.2	chr10	+	22081319	22082548	22081319	22082311	3	22081319,22081820,22082027,	22081380,22081949,22082548,
[ENSDART00000112054 PARP14 chr10:22142798-22154261 (-), NM_001124336 LOC100135999 chr10:22127647-22143824 (-)]	ENSDART00000112054	PARP14	chr10	-	22142419	22154261	22142798	22154261	18	22142419,22143152,22143424,22143664,22144371,22144687,22144992,22146132,22146417,22146622,22146977,22147568,22147810,22150919,22152740,22153120,22153561,22154080,	22143079,22143333,22143582,22144267,22144578,22144870,22145055,22146282,22146511,22146832,22147217,22147660,22149985,22151147,22152977,22153142,22153680,22154261,
[ENSDART00000109420 kcnip1b chr10:22203959-22232131 (+), ENSDART00000035188 kcnip1b chr10:22212598-22232076 (+)]	ENSDART00000035188	kcnip1b	chr10	+	22212598	22232129	22212881	22231023	8	22212598,22224971,22226070,22228251,22228394,22228579,22229159,22230975,	22212939,22225096,22226140,22228322,22228502,22228684,22229222,22232129,
[ENSDART00000133304 npm1 chr10:22234686-22245329 (+), ENSDART00000134189 npm1 chr10:22234810-22244842 (+), ENSDART00000129634 npm1 chr10:22234703-22245326 (+), ENSDART00000100526 npm1 chr10:22234703-22245326 (+), ENSDART00000021240 npm1 chr10:22234703-22245326 (+)]	ENSDART00000129634	npm1	chr10	+	22234703	22245326	22234836	22244704	13	22234703,22235783,22235968,22236177,22236350,22236538,22237489,22239923,22241392,22241548,22241718,22241907,22244662,	22234876,22235863,22236088,22236271,22236457,22236576,22237497,22239927,22241459,22241626,22241817,22241982,22245326,
[ENSDART00000016575 tlx3b chr10:22251263-22257211 (-)]	ENSDART00000016575	tlx3b	chr10	-	22251265	22257211	22252576	22257045	3	22251265,22254257,22256594,	22252790,22254495,22257211,
[NM_001113894 ugt1a6 chr10:22284097-22284763 (-), ENSDART00000064471 ugt5g2 chr10:22283926-22286624 (-)]	ENSDART00000064471	ugt5g2	chr10	-	22283105	22286624	22283926	22286624	2	22283105,22286501,	22285408,22286624,
[ENSDART00000128778 si:dkey-4c2.7 chr10:22287909-22292290 (-), ENSDART00000140210 si:dkey-4c2.7 chr10:22288674-22295715 (-)]	ENSDART00000128778	si:dkey-4c2.7	chr10	-	22287909	22292290	22288898	22292290	3	22287909,22291653,22292196,	22289141,22291841,22292290,
[ENSDART00000007359 si:ch73-111e15.1 chr10:22311734-22317156 (-), ENSDART00000149470 si:ch73-111e15.1 chr10:22311051-22317331 (-)]	ENSDART00000007359	si:ch73-111e15.1	chr10	-	22310818	22317156	22311734	22317156	4	22310818,22312007,22312215,22316996,	22311903,22312114,22312343,22317156,
[ENSDART00000127025 si:dkey-4c2.6 chr10:22324620-22327075 (-), ENSDART00000133374 si:dkey-4c2.6 chr10:22324040-22328152 (-)]	ENSDART00000133374	si:dkey-4c2.6	chr10	-	22324041	22328152	22324620	22327075	4	22324041,22326517,22326969,22328070,	22324743,22326678,22327083,22328152,
[ENSDART00000006173 cldn7b chr10:22344977-22350629 (-)]	ENSDART00000006173	cldn7b	chr10	-	22344976	22350629	22346126	22350359	4	22344976,22347686,22348034,22350136,	22346301,22347771,22348199,22350629,
[ENSDART00000064477 FGF11 (2 of 2) chr10:22362032-22448429 (-), ENSDART00000148831 FGF11 (2 of 2) chr10:22361794-22449654 (-)]	ENSDART00000064477	FGF11 (2 of 2)	chr10	-	22362032	22448429	22366721	22448429	6	22362032,22366274,22368893,22397223,22405156,22448236,	22363685,22366855,22369092,22397327,22405267,22448429,
[ENSDART00000112484 nlgn2b chr10:22582235-22678339 (+)]	ENSDART00000112484	nlgn2b	chr10	+	22582235	22681542	22582235	22678339	8	22582235,22622107,22639908,22671501,22675803,22676182,22676713,22677420,	22582722,22622161,22640058,22671687,22676069,22676336,22677080,22681542,
[ENSDART00000100497 zgc:172339 chr10:22701972-22706254 (-)]	ENSDART00000100497	zgc:172339	chr10	-	22701973	22706254	22703590	22706219	2	22701973,22705928,	22704166,22706254,
[ENSDART00000134864 GIGYF1 (3 of 3) chr10:22727924-22733396 (+), ENSDART00000109070 GIGYF1 (3 of 3) chr10:22711110-22733393 (+)]	ENSDART00000134864	GIGYF1 (3 of 3)	chr10	+	22727924	22733392	22727924	22730166	7	22727924,22728196,22729221,22729474,22729652,22730116,22732682,	22728107,22728351,22729397,22729519,22729764,22732599,22733392,
[ENSDART00000136123 kdm6bb chr10:22924268-22960869 (+), ENSDART00000079505 kdm6bb chr10:22943733-22963924 (+)]	ENSDART00000079505	kdm6bb	chr10	+	22943733	22963924	22943733	22960279	19	22943733,22944555,22945422,22945724,22946139,22947381,22947976,22951227,22951500,22953618,22954021,22954254,22954438,22955013,22955244,22958182,22958413,22958637,22960255,	22943852,22944630,22945618,22945937,22946274,22947735,22950513,22951354,22951606,22953824,22954128,22954323,22954587,22955128,22955432,22958324,22958540,22958808,22963924,
[ENSDART00000144845 tmem88a chr10:22972293-22979870 (+), ENSDART00000079499 tmem88a chr10:22972356-22979856 (+)]	ENSDART00000079499	tmem88a	chr10	+	22972356	22979797	22976144	22979486	3	22972356,22976102,22979204,	22972520,22976510,22979797,
[ENSDART00000079498 si:ch211-237l4.6 chr10:22982731-22986166 (+), ENSDART00000145558 si:ch211-237l4.6 chr10:22982731-22986660 (+)]	ENSDART00000145558	si:ch211-237l4.6	chr10	+	22982731	22986654	22985836	22986166	3	22982731,22985816,22986011,	22982957,22985921,22986654,
[ENSDART00000122543 PCOLCE (1 of 2) chr10:22989528-23003931 (-), ENSDART00000079469 PCOLCE (1 of 2) chr10:22989542-23003950 (-)]	ENSDART00000079469	PCOLCE (1 of 2)	chr10	-	22989668	23003950	22989953	23003931	10	22989668,22991028,22991797,22991949,22992165,22993602,22994273,22994867,22997118,23003818,	22990084,22991199,22991878,22992048,22992287,22993739,22994398,22995126,22997227,23003950,
[ENSDART00000100468 per1a chr10:23012652-23028581 (-), ENSDART00000079459 per1a chr10:23012652-23028581 (-), ENSDART00000121968 per1a chr10:23010980-23028617 (-)]	ENSDART00000121968	per1a	chr10	-	23010980	23028617	23012733	23028617	19	23010980,23013337,23013698,23013986,23014235,23015433,23015844,23016197,23016516,23016745,23017998,23019670,23019900,23020087,23021736,23022825,23023950,23024180,23028312,	23012931,23013488,23013882,23014155,23015176,23015754,23016015,23016316,23016658,23016854,23018242,23019824,23020007,23020166,23021928,23023027,23024072,23024434,23028617,
[NM_001032820 VAMP2 chr10:23041605-23042143 (-), ENSDART00000079454 vamp2 chr10:23038573-23045695 (-)]	ENSDART00000079454	vamp2	chr10	-	23038398	23045695	23038911	23045469	5	23038398,23041604,23041829,23042086,23045467,	23038928,23041656,23041988,23042189,23045695,
[ENSDART00000079449 and3 chr10:23048765-23054968 (-)]	ENSDART00000079449	and3	chr10	-	23048766	23054968	23048950	23054830	5	23048766,23050462,23050730,23050864,23054809,	23049565,23050617,23050772,23050919,23054968,
[ENSDART00000079437 AP4M1 chr10:23055012-23062288 (+), NM_001077099 AP4M1 chr10:23055249-23061867 (+)]	ENSDART00000079437	AP4M1	chr10	+	23055012	23062286	23055249	23061945	15	23055012,23055479,23055659,23055863,23056066,23056372,23057997,23058140,23058382,23058530,23058718,23059811,23059941,23060063,23061753,	23055307,23055565,23055766,23055960,23056177,23056453,23058060,23058207,23058436,23058637,23058810,23059856,23059992,23060181,23062286,
[ENSDART00000123786 arrb2a chr10:23091576-23107082 (+), ENSDART00000057291 arrb2a chr10:23091439-23107732 (+)]	ENSDART00000057291	arrb2a	chr10	+	23091439	23107729	23091576	23107082	15	23091439,23092137,23092244,23092391,23094265,23095240,23095442,23095616,23097026,23097235,23097453,23098923,23106681,23106851,23106994,	23091599,23092168,23092305,23092436,23094462,23095300,23095510,23095752,23097111,23097308,23097591,23099007,23106758,23106906,23107729,
[ENSDART00000131992 si:ch1073-143l10.2 chr10:23107664-23112569 (-)]	ENSDART00000131992	si:ch1073-143l10.2	chr10	-	23107171	23112569	23108114	23112364	6	23107171,23110389,23110737,23111926,23112118,23112276,	23108235,23110641,23110811,23112014,23112182,23112569,
[ENSDART00000125877 med11 chr10:23112612-23116889 (+), ENSDART00000134790 med11 chr10:23112564-23116410 (+)]	ENSDART00000134790	med11	chr10	+	23112564	23116408	23112564	23116148	4	23112564,23112823,23115731,23116004,	23112650,23112906,23115862,23116408,
[ENSDART00000066154 MED11 (2 of 2) chr10:23171557-23175834 (+)]	ENSDART00000066154	MED11 (2 of 2)	chr10	+	23171557	23175353	23171781	23175093	4	23171557,23171768,23174676,23174949,	23171595,23171851,23174807,23175353,
[ENSDART00000100802 FP102052.1 chr10:23218299-23229318 (-)]	ENSDART00000100802	FP102052.1	chr10	-	23218876	23229318	23219634	23229318	8	23218876,23220045,23220103,23224210,23224501,23224849,23228660,23229103,	23219967,23220091,23220363,23224338,23224554,23224989,23228799,23229318,
[ENSDART00000079711 slc25a1 chr10:23319645-23328578 (+), NM_065848 Y37B11A.3 chr10:23320536-23323929 (+)]	ENSDART00000079711	slc25a1	chr10	+	23319645	23328577	23319770	23327874	9	23319645,23320537,23323837,23324230,23324490,23325000,23325181,23325379,23327759,	23320008,23320645,23323937,23324369,23324575,23325105,23325297,23325453,23328577,
[ENSDART00000148333 nle1 chr10:23329995-23359064 (-), ENSDART00000079703 nle1 chr10:23330528-23359106 (-)]	ENSDART00000079703	nle1	chr10	-	23328044	23359106	23330961	23358874	13	23328044,23331079,23333350,23335450,23335729,23336921,23337141,23337985,23338193,23338838,23339006,23358739,23359049,	23330974,23331150,23333510,23335653,23335776,23337057,23337334,23338083,23338270,23338918,23339224,23358933,23359106,
[ENSDART00000135890 LTN1 chr10:23359144-23398115 (+), ENSDART00000022170 LTN1 chr10:23359201-23399550 (+)]	ENSDART00000022170	LTN1	chr10	+	23359201	23397984	23359201	23397524	30	23359201,23359863,23361775,23362460,23362785,23364717,23365695,23366800,23367401,23368435,23371677,23371807,23372301,23373648,23373926,23375240,23376013,23376297,23377760,23377980,23382006,23384169,23385787,23388601,23390654,23391119,23394755,23395046,23396869,23397461,	23359243,23360070,23361874,23362691,23362838,23364898,23365869,23366991,23367549,23369170,23371719,23371997,23372541,23373802,23374074,23375448,23376173,23376402,23377903,23378116,23382151,23384383,23386025,23388682,23390841,23391276,23394976,23395241,23397037,23397984,
[ENSDART00000127377 CR847844.5 chr10:23802774-23803487 (+)]	ENSDART00000127377	CR847844.5	chr10	+	23802774	23804582	23802774	23803487	3	23802774,23802913,23803335,	23802796,23803207,23804582,
[ENSDART00000148480 inpp5k chr10:24735729-24750722 (-), ENSDART00000109549 inpp5k chr10:24735729-24748344 (-)]	ENSDART00000148480	inpp5k	chr10	-	24735611	24750722	24735729	24749707	13	24735611,24735882,24736194,24736399,24736695,24740918,24743381,24743583,24744213,24746147,24747943,24749660,24750643,	24735798,24735987,24736278,24736537,24736903,24741028,24743493,24743759,24744330,24746256,24748048,24749715,24750722,
[ENSDART00000149362 PITPNA (1 of 2) chr10:24754946-24802508 (-), ENSDART00000002974 PITPNA (1 of 2) chr10:24756795-24774709 (-)]	ENSDART00000002974	PITPNA (1 of 2)	chr10	-	24752352	24774709	24756795	24774709	11	24752352,24756766,24757416,24765367,24765990,24766146,24766528,24767764,24772175,24774371,24774652,	24755305,24756843,24757539,24765478,24766068,24766230,24766603,24767772,24772267,24774517,24774709,
[ENSDART00000048532 slc43a2b chr10:24804083-24822150 (-), ENSDART00000141332 slc43a2b chr10:24803924-24822912 (-), ENSDART00000100772 slc43a2b chr10:24805697-24822912 (-)]	ENSDART00000048532	slc43a2b	chr10	-	24804083	24822150	24805757	24822150	13	24804083,24806018,24806222,24808241,24808594,24810518,24810779,24811757,24811983,24815856,24816037,24816327,24821990,	24805919,24806142,24806296,24808374,24808727,24810662,24810973,24811891,24812076,24815933,24816093,24816622,24822150,
[ENSDART00000112652 slc46a3 chr10:25060479-25072594 (+)]	ENSDART00000112652	slc46a3	chr10	+	25060479	25072594	25060479	25071997	6	25060479,25063341,25067912,25068246,25070468,25071900,	25060662,25064001,25068159,25068330,25070625,25072594,
[ENSDART00000132830 STOML3 (1 of 2) chr10:25072424-25079427 (-), ENSDART00000081834 STOML3 (1 of 2) chr10:25072680-25079424 (-), ENSDART00000079628 STOML3 (1 of 2) chr10:25072430-25079427 (-)]	ENSDART00000081834	STOML3 (1 of 2)	chr10	-	25072714	25079424	25072734	25079387	7	25072714,25073059,25073305,25074430,25074733,25075210,25079332,	25072923,25073194,25073356,25074471,25074806,25075314,25079424,
[ENSDART00000128902 C10H13orf23 chr10:25080880-25090541 (-)]	ENSDART00000128902	C10H13orf23	chr10	-	25080880	25090541	25082045	25090541	11	25080880,25083237,25084981,25087406,25087590,25087766,25089744,25089924,25090114,25090253,25090496,	25082168,25083385,25086383,25087485,25087677,25087877,25089838,25090019,25090183,25090319,25090541,
[ENSDART00000113696 THSD1 chr10:25114273-25117699 (+)]	ENSDART00000113696	THSD1	chr10	+	25114273	25118029	25114273	25117699	4	25114273,25116019,25116266,25116550,	25115300,25116178,25116523,25118029,
[ENSDART00000079566 AL928852.1 chr10:25118099-25120900 (-)]	ENSDART00000079566	AL928852.1	chr10	-	25118099	25120900	25118370	25120899	8	25118099,25119181,25119463,25119627,25119795,25120274,25120606,25120883,	25118554,25119372,25119552,25119725,25119955,25120503,25120677,25120900,
[ENSDART00000079549 tpte chr10:25121729-25139152 (+)]	ENSDART00000079549	tpte	chr10	+	25121729	25139150	25123271	25138721	20	25121729,25122133,25123246,25123567,25123727,25123904,25125567,25125769,25126739,25126944,25127129,25128928,25129111,25131316,25131474,25131851,25136268,25136452,25138463,25138618,	25122051,25122265,25123321,25123645,25123775,25124066,25125687,25125869,25126803,25127009,25127190,25129010,25129200,25131378,25131555,25131957,25136366,25136548,25138534,25139150,
[ENSDART00000114277 SMPD1 chr10:25142067-25155332 (-), ENSDART00000148582 SMPD1 chr10:25141162-25155584 (-)]	ENSDART00000114277	SMPD1	chr10	-	25140123	25155332	25142067	25155332	6	25140123,25147185,25147647,25150540,25152010,25155119,	25142459,25147331,25147724,25150712,25152786,25155332,
[ENSDART00000079528 ilk chr10:25156454-25190812 (-)]	ENSDART00000079528	ilk	chr10	-	25156453	25190812	25157980	25184409	13	25156453,25158217,25158836,25159955,25161618,25163922,25164151,25165586,25165828,25167217,25167993,25184320,25190689,	25158130,25158348,25158936,25160077,25161746,25164032,25164237,25165670,25165925,25167313,25168159,25184601,25190812,
[ENSDART00000064463 fxc1 chr10:25193411-25197184 (-), NM_001040530 FXC1 chr10:25194008-25196868 (-)]	ENSDART00000064463	fxc1	chr10	-	25193414	25197184	25193624	25197007	3	25193414,25196772,25196980,	25194110,25196868,25197184,
[ENSDART00000140877 si:ch1073-15f19.2 chr10:25209484-25215642 (-)]	ENSDART00000140877	si:ch1073-15f19.2	chr10	-	25209677	25215642	25210228	25215642	3	25209677,25210410,25215343,	25210325,25210504,25215642,
[ENSDART00000078218 CABZ01058107.1 chr10:25297786-25307969 (-)]	ENSDART00000078218	CABZ01058107.1	chr10	-	25297741	25307969	25297765	25307969	7	25297741,25298001,25298327,25298811,25306210,25307434,25307770,	25297901,25298108,25298489,25299209,25306222,25307665,25307969,
[ENSDART00000067533 BX897671.2 chr10:25571228-25590724 (+)]	ENSDART00000067533	BX897671.2	chr10	+	25571228	25594040	25571228	25590724	4	25571228,25576781,25581282,25590164,	25571715,25576883,25581342,25594040,
[NM_001146583 c209a chr10:25707894-25721255 (+), ENSDART00000040733 si:ch211-214k5.1 chr10:25703515-25709249 (+)]	NM_001146583	c209a	chr10	+	25707894	25721655	25707894	25721255	5	25707894,25707998,25708224,25719478,25721186,	25707927,25708029,25708248,25719586,25721655,
[NM_001108128 Chordc1 chr10:25830789-25838052 (+), ENSDART00000024514 chordc1 chr10:25830711-25838818 (+)]	ENSDART00000024514	chordc1	chr10	+	25830711	25838825	25830795	25838644	11	25830711,25831293,25831451,25834565,25834911,25835101,25835250,25835417,25837765,25838015,25838464,	25830859,25831343,25831508,25834717,25835015,25835160,25835321,25835523,25837885,25838078,25838825,
[NM_001088273 kpna7 chr10:25840055-25842699 (-), ENSDART00000036906 KPNA7 chr10:25839745-25842829 (-)]	ENSDART00000036906	KPNA7	chr10	-	25839769	25842829	25839792	25842696	10	25839769,25840052,25840301,25840790,25841094,25841442,25841696,25842238,25842400,25842630,	25839882,25840199,25840484,25841024,25841358,25841525,25841965,25842324,25842541,25842829,
[ENSDART00000042767 GRM5 (1 of 2) chr10:25847833-25894051 (+), NM_001206004 GRM1 chr10:25847893-25888021 (+)]	ENSDART00000042767	GRM5 (1 of 2)	chr10	+	25847833	25894622	25847833	25894051	8	25847833,25857817,25876071,25878114,25878549,25880903,25887158,25893177,	25848524,25858067,25876307,25878361,25878718,25881030,25888098,25894622,
[ENSDART00000100438 RAB38 (2 of 2) chr10:25900834-25912102 (+), ENSDART00000140186 RAB38 (2 of 2) chr10:25905486-25912318 (+)]	ENSDART00000140186	RAB38 (2 of 2)	chr10	+	25905486	25916099	25905486	25912102	2	25905486,25911949,	25905769,25916099,
[ENSDART00000123820 tmem135 chr10:25947478-25962770 (-)]	ENSDART00000123820	tmem135	chr10	-	25947484	25962770	25948457	25962686	15	25947484,25950920,25951692,25953404,25953553,25953760,25954141,25955834,25956148,25956338,25957954,25958233,25959566,25960056,25962545,	25948590,25950988,25951791,25953481,25953617,25953928,25954211,25956002,25956190,25956385,25958020,25958267,25959659,25960184,25962770,
[ENSDART00000009477 cct8 chr10:25963451-25979373 (-)]	ENSDART00000009477	cct8	chr10	-	25963452	25979373	25963628	25979264	15	25963452,25964454,25967586,25967832,25967998,25970097,25970304,25970477,25972371,25972592,25972733,25973619,25973858,25976413,25979204,	25963700,25964574,25967751,25967904,25968114,25970185,25970371,25970656,25972509,25972654,25972914,25973769,25973938,25976504,25979373,
[truncated: 14,430 more rows]
